# Supplementary material for: Decoding the complexity of delayed wound healing following Enterococcus faecalis infection
Source: eLife. 2024 May 20;13:RP95113. doi: 10.7554/eLife.95113 (PMC11105157; doi:10.7554/eLife.95113)
Supplement: Supplementary file 2. — Related to Figure 1C. [file elife-95113-supp2.xlsx]

## Sheet: EPITHELIAL
Supplementary file 2a: Differential expression table of genes for epithelial cells
Related to Figure 1C
Wilcoxon rank sum test run using the integrated dataset
BAS1				BAS2				BAS3				SUP1				SUP2				SUP3				SUP4				HFSUP1				HFSUP2				SG				OB
Gene	avg_log2FC	p_val_adj		Gene	avg_log2FC	p_val_adj		Gene	avg_log2FC	p_val_adj		Gene	avg_log2FC	p_val_adj		Gene	avg_log2FC	p_val_adj		Gene	avg_log2FC	p_val_adj		Gene	avg_log2FC	p_val_adj		Gene	avg_log2FC	p_val_adj		Gene	avg_log2FC	p_val_adj		Gene	avg_log2FC	p_val_adj		Gene	avg_log2FC	p_val_adj
Krt5	2.69281	0		Tmem163	1.58777	0		Fhod3	0.730517	1.33585e-161		Krt10	2.85092	0		Gm42418	1.33426	1.54291e-296		Efna5	2.14536	0		Lor	5.22843	0		Krt6b	3.34943	0		Krt79	4.52692	0		Gm42418	1.527	0		Tenm2	2.36054	0
Fcgbp	2.38723	0		Mmp1b	1.01047	0		Gm16685	1.84439	3.24539e-153		Krt1	2.62122	0		mt-Co3	0.686545	4.04544e-156		Ssbp2	2.09249	0		Crct1	4.3074	0		Krt6a	3.06284	0		Defb6	4.09434	0		Camk1d	1.57124	1.15845e-294		Nfib	2.297	0
Col17a1	2.23446	0		Kcnk1	0.649192	0		Crabp1	0.973375	3.3334e-130		Krt77	2.42956	0		mt-Cytb	0.750096	1.74232e-139		Herc4	2.05891	0		Flg	4.08806	0		Krt16	2.81679	0		Adgrl3	2.37002	0		AY036118	1.73974	1.93902e-268		Adgrl3	2.22884	0
Sox6	2.20335	0		Wnt3a	0.538258	0		Col12a1	2.02985	2.33602e-108		Clca3a2	2.20989	0		Camk1d	1.22888	1.06098e-116		Sox6	2.04717	0		Flg2	3.77953	0		Stfa1	2.8008	0		Skint3	2.20434	0		Krt14	0.856568	3.13301e-188		Ptn	1.84248	0
Krt15	2.11944	0		Syt8	0.381961	0		Gjb6	0.771309	6.2084e-104		Mt4	2.18005	0		AY036118	1.2917	7.20512e-114		Map2k4	2.04619	0		Hrnr	3.76128	0		Csta1	2.79315	0		Nebl	2.15311	0		Cstdc5	0.853192	2.40925e-149		Sox9	1.70543	0
Itga6	1.87344	0		Gm4610	0.330225	0		Gsta4	0.972032	1.06e-101		Krtdap	2.07483	0		Krt14	0.492958	4.48553e-113		Epha4	1.94769	0		Asprv1	3.75394	0		Fabp5	2.61565	0		Epcam	1.94315	0		Cmss1	0.95325	3.481e-113		Lgr5	1.64678	0
Krt14	1.82069	0		Ucn2	0.316381	0		Abi3bp	1.18147	2.01991e-100		Dsg1a	2.05527	0		mt-Co2	0.600009	2.02492e-109		Dennd2c	1.92611	0		Lce1a1	3.73684	0		Sprr2d	2.60836	0		Scel	1.75996	0		Krt1	0.494402	1.36904e-106		Lhx2	1.13387	0
Ssbp2	1.77955	0		Il24	1.02498	1.18239e-293		Tnn	0.741273	4.83539e-99		Lgals7	1.96564	0		mt-Nd1	0.762784	1.12751e-106		Gm15987	1.91539	0		2310046K23Rik	3.65443	0		Gjb2	2.56322	0		Casz1	1.70136	0		Krt16	0.837115	2.47974e-104		Cspg4	0.661099	0
Gnai1	1.67586	0		Tnnt2	0.335487	4.8965e-244		Gjb2	1.55286	1.36671e-93		Perp	1.77378	0		mt-Nd4	0.731076	4.50128e-104		Cdh1	1.85511	0		Lce1a2	3.48212	0		Cstdc5	2.45474	0		Alox12e	1.63282	0		Fabp5	0.640546	3.23019e-95		Sema3e	2.05236	1.83911e-296
Ccl27a	1.65876	0		Gramd2	0.695772	1.16024e-239		Ube2c	0.94284	3.38363e-92		Calm4	1.74668	0		mt-Nd2	0.787789	2.52907e-102		Cdcp1	1.72548	0		Sbsn	3.32121	0		Sprr1b	2.37056	0		Sox9	1.58963	0		Lgals7	0.476046	1.53171e-82		Sdk2	0.940031	2.58963e-294
Efna5	1.58615	0		G930009F23Rik	0.656661	2.53919e-219		Thbs2	1.16058	1.8479e-90		Anxa8	1.6937	0		mt-Atp6	0.543328	3.9019e-101		Ptpn13	1.6188	0		Cnfn	3.22734	0		Krt17	2.19493	0		Pkib	1.55764	0		Krt6a	0.939056	5.19929e-76		Lgr4	1.90953	3.43357e-277
Clca3a2	1.56373	0		Ces2f	0.462089	5.03822e-211		Cacna1c	1.02932	6.50931e-89		Fam25c	1.66066	0		Cstdc5	0.488265	5.82672e-73		Map7	1.5239	0		Klk7	3.22703	0		Krt14	2.07161	0		Shroom3	1.16361	0		Uqcrb	0.275518	4.8783e-73		Adgra3	1.43766	6.98762e-276
Slc24a3	1.53994	0		Slit1	1.00817	6.24706e-210		Ncam1	0.900681	2.69881e-87		Dsp	1.65698	0		Krt16	0.561934	7.16819e-72		Fam135a	1.96128	5.553e-303		Calm4	2.94844	0		Ly6d	1.62641	0		Atp6v1c2	1.07789	0		Krt6b	0.918635	1.73393e-66		Ptprk	1.89975	7.16859e-275
Trp63	1.52163	0		Pcyt1b	0.253662	1.83892e-206		Il1rl1	1.13303	7.27878e-86		Dsc3	1.64517	0		Cmss1	0.796642	1.61942e-67		Tenm4	1.41056	6.53147e-299		Spink5	2.94805	0		Gsta4	1.56521	0		Skint4	1.06041	0		Atp5k	0.319925	1.02369e-64		Sh3rf1	2.15347	1.76828e-274
Sema3c	1.52017	0		Hmga2	2.00292	6.26037e-206		Plod2	1.06776	4.21054e-84		Dmkn	1.62413	0		Fabp5	0.40864	1.32948e-66		Npepps	1.54716	4.43739e-296		Krtdap	2.90328	0		Perp	1.40964	0		Myo5b	1.01282	0		Ndufs5	0.268516	3.82287e-64		Fst	2.10343	2.52808e-274
Sema5a	1.50124	0		Mmp10	1.10647	5.28032e-200		Dsc2	0.62401	1.27737e-83		Ly6d	1.58215	0		Gm26917	0.576726	8.02278e-58		Mindy3	1.82067	3.58505e-289		Cdsn	2.89236	0		Sprr2h	1.27981	0		Aadac	0.884254	0		Ndufb3	0.26913	1.54146e-63		Esyt3	0.55721	4.48883e-272
2610035D17Rik	1.44079	0		Pitpnm3	1.14561	1.0115e-185		Hist1h1b	0.797315	8.28983e-80		Serpinb5	1.57299	0		Krt6a	0.559808	4.97295e-44		Cxadr	1.39064	7.36944e-289		Fam25c	2.85051	0		Lgals7	1.27248	0		Gata6	0.826508	0		Fkbp3	0.279938	6.32558e-51		Hmcn1	1.88159	1.6345e-270
Cdcp1	1.43469	0		Car9	0.688587	7.91813e-180		Sdk1	0.919617	7.17867e-79		Trim29	1.5645	0		Ggh	0.302081	8.555e-39		Cecr2	1.34001	3.38135e-286		Cst6	2.8181	0		Csta3	1.27189	0		Foxc1	0.789136	0		Mkrn1	0.321229	2.06024e-50		Pawr	1.7752	2.31612e-270
Stfa3	1.41778	0		Sh2d5	0.568148	5.89692e-177		Krt6b	1.94598	5.91705e-78		Skint9	1.55275	0		Krt6b	0.513132	7.73492e-37		2610035D17Rik	1.56145	9.83414e-285		Gm94	2.72488	0		Dsc2	1.21936	0		Nfe2l3	0.660221	0		Ndufa4	0.257127	6.34144e-49		Cxadr	1.66407	5.43361e-260
Grip1	1.40968	0		Pthlh	1.08338	4.36801e-176		Apod	1.69396	1.86651e-77		Sbsn	1.55061	0		mt-Atp8	0.424545	3.44354e-34		Klf5	1.30938	2.07409e-282		Lce1f	2.70396	0		Krtdap	1.17938	0		Igsf9	0.556828	0		Hmgcs1	0.254255	6.75866e-46		Tfap2b	1.01136	1.96927e-254
Cadm1	1.3164	0		Samd12	2.95892	1.13236e-172		Krt6a	1.95472	4.12666e-77		Sfn	1.52413	0		Atp5g3	0.302155	5.17942e-33		Irf6	1.48648	3.9075e-280		2310050C09Rik	2.68253	0		Gjb6	1.16274	0		Skint2	0.517671	0		Msmo1	0.339645	1.36894e-41		Casz1	1.60281	2.65103e-252
Fxyd3	1.28507	0		Wincr1	0.298274	8.80391e-155		Adam12	1.06869	9.20404e-77		Lypd3	1.49542	0		Gphn	0.557093	5.15879e-27		Smg1	1.50524	6.70705e-277		Ly6g6c	2.62032	0		Stfa2	0.975584	0		Acot1	0.494651	0		Blmh	0.31474	1.05712e-37		Moxd1	1.25008	3.4326e-248
P3h2	1.27515	0		Slc2a5	0.282057	9.98581e-154		Nav3	1.12825	9.96803e-77		Skint6	1.47948	0		Lars2	0.693162	2.26593e-25		Ppp1r14c	1.45957	8.98166e-276		Dmkn	2.56642	0		Sfn	1.44121	2.41758e-297		Sult5a1	1.4793	3.22893e-299		Tuba4a	0.37426	4.59676e-35		Arhgap44	1.39984	2.39582e-246
Ifi202b	1.26275	0		Tmem117	0.86672	1.03827e-152		Rian	1.02571	4.48982e-76		Gadl1	1.45967	0		1810037I17Rik	0.298652	7.92762e-24		mt-Atp6	0.98264	7.57394e-273		Cysrt1	2.53604	0		Tmprss11g	0.833094	2.41445e-292		Ano9	0.756578	1.0574e-297		Lars2	0.658295	1.01677e-31		Golim4	1.79221	1.31454e-245
Dennd2c	1.26118	0		Rapgef3	0.558565	1.24505e-152		Cthrc1	0.989411	2.47e-73		Jup	1.45732	0		mt-Nd4l	0.589295	6.61229e-23		Gata3	1.30183	8.48442e-273		Hal	2.49528	0		Dmkn	1.17913	6.22381e-287		Bmp7	0.638007	1.06524e-291		Palld	0.281395	2.52575e-31		Rnf217	1.72157	8.82509e-234
Robo1	1.25574	0		Fermt1	1.44096	9.70585e-143		Cyp7b1	0.884979	1.56683e-72		Skint11	1.39561	0		mt-Nd3	0.881019	2.74763e-22		Pawr	1.30467	2.04724e-270		Hspb1	2.48924	0		Klk13	0.688093	7.0483e-246		Lratd1	0.954148	1.16846e-290		Tpm2	0.676864	3.25279e-31		Vdr	1.40555	1.0277e-233
Pkp4	1.24972	0		Ifitm10	0.758363	2.28589e-131		Lox	1.20473	2.19749e-72		Abca12	1.38674	0		Atp5h	0.272468	3.36577e-22		Ifi202b	2.24002	3.99859e-269		Pof1b	2.25038	0		S100a8	0.84239	8.49233e-244		Aldh3a1	0.539583	6.31883e-290		Pkp3	0.266031	3.28298e-31		Ctnnal1	1.05321	1.34172e-232
Ptpn13	1.22553	0		Duox1	0.592618	6.51765e-126		Hs6st2	0.667543	5.20438e-72		Pof1b	1.38381	0		Mgst1	0.250398	2.31962e-19		Myo1e	1.49631	1.10396e-264		Tmprss11f	2.24215	0		Dsp	1.25561	4.66451e-237		Usp43	0.397239	4.35921e-283		Gphn	0.604858	5.70028e-29		Cadm1	1.6464	8.86636e-224
Cdh13	1.22143	0		Syt16	0.334743	1.2374e-123		9530059O14Rik	0.753008	8.53047e-72		Rab25	1.38162	0		Tuba4a	0.335926	3.18101e-19		Gnai1	1.47459	2.59278e-264		Serpinb7	2.2106	0		Stfa3	1.67799	1.89108e-218		Lmo7	1.5168	1.24853e-281		Auts2	0.288283	9.81145e-29		Npnt	0.674096	4.563e-220
Lamc2	1.21942	0		Mmp13	2.63126	4.51268e-121		Csta1	1.15157	6.91962e-71		Gltp	1.37389	0		Sqle	0.27813	1.52273e-13		Ctnnd1	1.41853	4.01157e-259		Abca12	2.2002	0		Calm4	1.0849	1.63668e-217		Atp6v0a4	0.773179	1.56759e-271		Krt5	0.7471	8.81933e-27		Plekha7	1.23269	3.34747e-217
Cxadr	1.20862	0		Itgb4	3.03259	1.01539e-120		Tnfaip6	0.811159	1.89378e-69		Tmprss4	1.34522	0		Krt5	0.32799	1.45569e-12		Cadm1	1.51453	6.45528e-259		Nccrp1	2.16598	0		Krt1	1.19674	8.26888e-216		Endod1	0.843769	1.00644e-269		Sqle	0.254747	1.39027e-24		Bcl11a	1.09058	7.04187e-216
Klf5	1.19126	0		Padi4	0.544365	4.55457e-120		Lrrc15	0.939341	6.34707e-69		Ly6g6c	1.3423	0		Pf4	0.376383	1.29861e-10		Tjp2	1.67153	2.90042e-258		Dapl1	2.12909	0		S100a9	0.516292	1.03037e-210		Calml3	1.10262	6.46804e-268		Ckmt1	0.473715	3.01003e-24		Epcam	1.27825	4.59297e-211
Dsg3	1.15812	0		Itga2	2.14716	6.5273e-120		Hmga2	0.463829	2.22093e-68		Apoc1	1.33514	0		Scd1	0.974727	1.9303e-06		Dsc3	1.33154	1.00251e-256		Krt23	2.10144	0		Cstdc6	0.518283	4.97715e-210		Efnb2	1.44681	3.6287e-260		Fgfr2	0.660856	8.7772e-24		Tcf12	1.76145	7.38998e-206
Herc4	1.13675	0		Lamb3	3.3527	1.75216e-119		Slit3	1.06311	2.36146e-67		Rplp0	1.31047	0		Rps26	0.264686	0.000482928		Pard3	1.37234	3.20695e-256		Mboat2	2.08154	0		2610528A11Rik	1.40861	2.68661e-209		Mill1	1.31579	4.88781e-259		Idi1	0.488813	4.85089e-23		Tanc2	1.66987	2.08643e-203
Ppp1r14c	1.12595	0		Vwa1	0.769307	7.6531e-117		Samd12	0.815816	4.59677e-67		Gata3	1.29367	0		H2-K1	0.282005	0.000864443		Cd2ap	1.62686	4.60946e-255		Klk5	2.07235	0		Rbp2	1.039	1.58601e-200		Susd2	0.980166	9.29006e-250		Gm37240	0.629238	1.12443e-22		Col17a1	1.55004	2.681e-203
1700025G04Rik	1.11827	0		Col7a1	2.33256	6.44527e-115		Col5a1	1.26444	7.10196e-67		Gm15987	1.27867	0		Stfa3	0.343738	0.000943402		Lypd6b	1.34418	1.32331e-254		Map2	2.06263	0		Urah	1.56821	2.49282e-188		Egr2	0.855726	5.94117e-249		Tmprss4	0.289107	1.73539e-22		Sostdc1	0.765275	3.45268e-203
Peli2	1.1094	0		Itga3	1.70277	7.37684e-115		Pcsk5	0.828118	3.93935e-66		1810037I17Rik	1.25221	0		Cdk8	1.08284	0.0121998		Esrp1	1.17767	1.34542e-252		Kprp	2.05208	0		Il33	1.73989	1.15853e-182		Klc3	0.983402	7.50941e-249		Anxa8	0.251629	7.14667e-21		Lgr6	0.895729	1.98422e-202
Bcl11b	1.10922	0		Fam167a	0.891488	9.87156e-113		Sulf1	0.788882	7.92718e-66		Fxyd3	1.24415	0		Aqp3	0.330779	0.0234972		Sh3d19	1.49288	1.06719e-250		Orm1	2.04187	0		Defb1	0.931577	1.97014e-172		Gstm5	1.00059	5.56935e-248		Urah	0.312742	1.08249e-19		Trp63	1.50278	1.00254e-200
Map7	1.10202	0		Lama3	3.74235	9.19473e-112		Cdh11	0.755304	2.53216e-65		Avpi1	1.22889	0		Elovl4	0.621151	0.039765		mt-Co3	0.88261	4.27154e-249		Pla2g2f	2.04184	0		Teddm3	0.895732	3.36899e-171		Pdzk1ip1	1.22739	4.28487e-242		Ggct	0.395517	7.01595e-19		Efna5	1.64336	1.74523e-198
Gata3	1.10142	0		Patj	0.991168	4.83649e-106		Fbln2	1.25958	1.47185e-64		Tprg	1.22326	0						Nr6a1	1.45211	1.22312e-248		Elovl1	1.98294	0		Gm42418	0.865207	1.7339e-170		Sdr16c6	0.920485	2.15762e-240		Etl4	0.344742	1.49545e-17		Samd5	0.671544	1.46453e-197
Wnt4	1.09807	0		Gjb6	1.34889	6.28295e-105		Medag	0.823782	5.20873e-64		Epha4	1.21395	0						Map3k20	1.42532	5.64108e-248		Psapl1	1.96781	0		Sbsn	0.78717	1.95822e-162		Slc5a8	0.827695	5.33226e-239		S100a14	0.335706	4.16749e-17		Afdn	1.59616	1.37942e-195
Mark3	1.09219	0		Etv4	0.334475	1.45304e-104		Acta2	0.655883	8.59722e-64		Alox12e	1.19702	0						Ctnna1	1.35763	2.48975e-246		Ivl	1.96547	0		Jup	1.26847	4.76542e-157		Skint1	0.908882	1.25432e-236		Calm4	0.469243	1.4764e-16		Kank1	1.63016	2.60972e-195
Itgb4	1.08033	0		Glt1d1	1.15262	3.86253e-102		Clstn2	0.47386	1.10313e-63		Scel	1.18985	0						Tiam1	1.43444	1.40905e-245		Il1f5	1.957	0		Krt10	0.665142	2.40837e-156		Vdr	1.19627	9.65543e-235		Trim29	0.326611	2.75034e-15		Ptprg	1.47672	8.33587e-195
Slco3a1	1.07289	0		Lamc2	4.51707	5.94891e-100		Col6a3	1.00015	6.16061e-63		Pkp1	1.18184	0						Slco3a1	1.50945	7.08002e-244		Krt80	1.94831	0		Pkp1	1.17855	6.0719e-149		Rbp1	1.18125	2.36013e-234		Perp	0.467633	1.37372e-13		Etl4	1.33887	1.0284e-190
Irf6	1.06939	0		Il11	0.257203	8.26075e-100		Tnc	1.04656	4.47632e-59		Fam135a	1.18117	0						Trp63	1.44416	9.96734e-244		Dnase1l3	1.93548	0		Spink5	1.75795	1.02264e-145		Prickle2	1.18911	1.92217e-232		Zfhx3	0.660651	8.29415e-12		Syne2	1.39665	4.52682e-190
Lama3	1.05172	0		Slc25a21	0.637616	2.29496e-98		Col5a2	1.16347	4.39579e-56		Map2k4	1.17902	0						Gtf2f2	1.40334	8.54296e-243		Klk8	1.93198	0		Lypd3	1.23657	2.35612e-145		Ocln	0.965545	2.75872e-232		Apoc1	0.414059	5.33013e-10		Crim1	1.34479	4.61743e-190
Fgfr2	1.04997	0		Moxd1	1.61171	2.99619e-97		Bnc2	0.771882	9.58578e-56		Fabp5	1.17591	0						Epb41l5	1.02703	2.86812e-240		Lypd5	1.93057	0		Dstn	1.08668	1.63624e-141		Emp2	1.41519	1.05514e-229		Tacstd2	0.41603	1.00336e-08		Ptpn13	1.51377	1.31498e-188
Mcc	1.04797	0		Gli2	0.847624	1.12626e-96		Loxl2	0.872915	1.20178e-55		Ralbp1	1.1642	0						Ralgps2	1.18802	1.08265e-239		Elovl4	1.91546	0		Ptprz1	0.549922	2.05993e-140		Cst6	4.3293	3.65977e-228		Fxyd3	0.379056	5.89836e-08		Myo1d	1.56373	2.5486e-188
Gm49890	1.03795	0		Map6	0.803509	1.37842e-96		Cald1	1.10967	1.28247e-54		Tmem45a	1.15935	0						Sgms1	1.57177	1.20561e-239		Ide	1.85421	0		Hspb1	0.912552	1.5324e-137		Cldn1	1.35432	1.66512e-227		Dmkn	0.423073	2.76622e-07		Robo2	2.1853	7.06718e-188
Ptma	1.02266	0		Bmpr1b	1.89279	4.80668e-93		Col5a3	0.934428	2.23205e-54		Pycard	1.15556	0						Nckap1	1.16092	2.74159e-237		Calml3	1.78903	0		AY036118	1.28681	1.22163e-133		Skint8	0.451194	1.80865e-226		Pkp1	0.443548	5.48226e-07		Itga6	1.26529	4.96188e-185
Nfix	1.01764	0		Prelid2	0.97798	3.12224e-92		Colec12	0.688744	3.61285e-54		Cdh1	1.15066	0						Baiap2l1	1.21832	3.4517e-237		Cobl	1.78204	0		Aqp3	1.25816	6.96426e-128		Rassf9	0.904322	6.85692e-226		Aqp3	0.483489	1.23914e-05		Map7	1.23041	9.98333e-185
Rpl28	0.999426	0		Pi15	1.50861	3.62792e-92		Gfpt2	0.753341	3.6524e-54		Tacstd2	1.15062	0						mt-Nd1	0.919246	4.96061e-236		Slurp1	1.78112	0		Crabp2	0.847075	4.65525e-126		Bbox1	0.805231	2.31147e-225		Scd1	1.65924	0.000151473		Cdh3	1.02692	1.63293e-184
Dsc3	0.995536	0		Trp53i11	0.743752	5.00664e-92		Meg3	0.640044	7.89999e-54		Slco3a1	1.14379	0						Clec2g	1.00702	1.60082e-232		Ppl	1.7699	0		Endou	0.854974	5.59437e-118		Efna3	0.547607	2.86033e-224						Arhgef4	1.11411	7.9992e-181
Ahcyl2	0.992753	0		Has3	0.665642	6.22591e-89		Col1a2	1.36427	1.07083e-53		Irf6	1.14137	0						Naa15	1.17515	9.36726e-231		Elmod1	1.75859	0		S100a16	1.11812	1.52105e-110		Celsr2	0.818331	1.45675e-221						Ppp1r14c	1.33306	2.84958e-180
Gas5	0.986991	0		Grip1	3.72871	8.79999e-87		Zfpm2	0.678962	1.07208e-53		Tiam1	1.13457	0						Grip1	1.5396	6.00335e-230		Dsc1	1.74367	0		Dsg1b	0.92972	5.21494e-109		Plekha7	0.788129	1.79468e-219						Aopep	1.44746	4.6557e-180
Rpl4	0.97532	0		Sorcs2	1.65633	1.40584e-86		Rarres2	0.77372	1.29261e-53		Dsg1b	1.12576	0						Myo10	1.32458	2.82133e-229		Slc5a8	1.71866	0		Sprr2a3	0.895212	2.19242e-107		Clip4	1.16124	4.66583e-218						Bnc2	1.49617	5.02472e-179
Sh3d19	0.973699	0		Vsnl1	0.456834	1.54977e-86		Col1a1	1.38156	9.17497e-52		Elovl4	1.12355	0						Dip2b	1.33808	2.20492e-227		Pdzk1ip1	1.71093	0		Lypd5	0.572639	2.27223e-100		Lurap1l	0.367181	1.16684e-217						Zbtb16	1.41646	2.7075e-178
Rps18	0.965541	0		Rnf152	1.29165	4.746e-86		Mki67	0.697775	2.70723e-51		Herc4	1.11443	0						Ehf	1.21666	5.02933e-225		Smpd3	1.70558	0		Fam162a	1.22348	1.39896e-99		Acpp	1.37647	3.22268e-217						Mical3	1.05245	3.54541e-175
Rpl32	0.964427	0		Duoxa1	0.262344	7.3804e-85		Aspn	0.643368	3.78976e-51		Dapl1	1.11106	0						Slc24a3	1.65974	1.28975e-223		Ereg	1.67057	0		Gsdmc	0.714668	7.94231e-99		Klk7	1.67148	5.16629e-217						Pard3	1.1522	1.27254e-170
Lamb3	0.945354	0		Phldb2	2.2288	5.32376e-84		Postn	1.0149	8.25243e-51		Rps18	1.10831	0						Yap1	1.24875	3.64369e-221		Skint6	1.63395	0		Sprr1a	1.22285	1.26637e-97		Epha4	1.48588	5.61643e-217						Gpc4	1.2344	1.12419e-168
Hmgn1	0.941904	0		Gm49890	1.04717	8.3379e-83		Sorcs2	0.828666	9.77969e-51		Ggct	1.09829	0						Wwc1	1.11137	5.36646e-221		Casp14	1.60541	0		Elovl4	0.790529	2.25994e-94		Pcsk6	0.834269	2.56275e-216						Fgfr2	1.4139	2.47591e-168
Cdh1	0.941507	0		Bnc1	0.789836	2.24896e-82		Serpinh1	1.02291	4.67616e-50		Sdc4	1.08494	0						Srpk2	1.27317	3.09404e-220		Slc6a14	1.59272	0		Rab25	0.804012	4.57554e-94		Cxadr	1.37521	3.18999e-215						Trabd2b	1.54446	3.72562e-167
Rpl12	0.934922	0		Porcn	0.631726	9.55992e-81		Top2a	0.838635	5.33813e-50		Lgals3	1.08379	0						mt-Co2	0.797837	3.66173e-220		Nrtn	1.58618	0		S100a14	0.973664	1.23151e-93		Adgra3	0.716978	1.01726e-214						Krt15	2.31877	5.83903e-166
Slco2a1	0.933385	0		Csta3	1.12326	1.63438e-80		Krt16	1.04495	5.57371e-50		Sptssa	1.08262	0						mt-Nd4	0.853494	1.0109e-219		Atp6v1c2	1.5522	0		Samd12	0.493674	9.36783e-92		Eps8l1	0.718291	6.57264e-213						Acpp	1.10478	4.14512e-161
Tns4	0.930617	0		Dkk3	0.8362	1.67503e-78		Rcn3	0.855669	1.1106e-49		Sptlc3	1.07429	0						Egfr	1.55114	4.48792e-219		Clic3	1.54869	0		Cnfn	0.983946	1.94238e-88		Rgs20	1.14937	1.1138e-212						Palmd	1.1535	4.111e-160
Rps27	0.928899	0		Aff3	1.4233	3.37678e-78		P4ha2	0.808766	2.79329e-48		Ptgs1	1.06397	0						Syne2	1.24012	7.7359e-217		Eps8l1	1.52537	0		Nrarp	0.514853	1.90557e-87		Krt80	1.07101	1.98937e-208						Cpne8	1.25037	8.90712e-160
Nr6a1	0.92639	0		Tgfa	1.72013	3.54113e-78		Slc7a2	0.735608	4.38352e-48		Oas1f	1.04872	0						Tspan5	1.54248	1.33599e-215		Krt78	1.51813	0		Gm94	0.751005	1.32703e-86		Faah	0.429585	5.23293e-208						Grip1	1.52772	6.52738e-159
Rplp0	0.919017	0		Wnt10a	0.722955	1.55667e-77		Aebp1	0.73771	1.33532e-47		Acsl1	1.03822	0						Mast4	1.12788	1.89677e-214		Klk6	1.49629	0		Dsc3	0.854283	3.24723e-86		Krt17	2.68137	7.1532e-206						Btbd11	1.20948	3.76388e-156
Rpl13	0.899151	0		Prss12	0.897376	1.87195e-75		Bgn	0.899344	4.19557e-47		Clip4	1.03683	0						Tacc2	1.15395	2.27479e-214		Tspan8	1.46715	0		Sult2b1	0.672449	1.86483e-84		Grhl1	0.969317	1.16965e-202						Lmtk2	1.55922	4.35445e-156
Ybx3	0.895919	0		Tenm2	1.5232	1.40881e-74		Prrx1	0.697514	4.33098e-47		Klf5	1.03343	0						Ptpn3	1.0382	1.0129e-213		Susd2	1.45609	0		Tpm2	0.729536	3.9072e-83		Wwc1	1.09235	1.50262e-202						Klhl29	1.08592	9.88439e-155
Gm15987	0.894682	0		Nckap5	2.3376	2.59187e-74		Sox5	0.64698	4.6597e-47		Lrrc1	1.0334	0						mt-Co1	0.910043	2.23835e-213		Lgalsl	1.44041	0		Dsg3	0.924312	5.3169e-83		Cttnbp2	0.983738	1.18215e-200						Sult5a1	1.43984	1.5826e-154
Rpl11	0.889059	0		E2f7	0.583835	5.6302e-73		Timp1	0.797069	4.91442e-47		Ybx3	1.03078	0						Strn3	1.25239	2.89835e-212		Slc5a1	1.41372	0		Bpifc	0.511005	1.08934e-82		Plet1	1.78516	1.1367e-198						Mir205hg	0.846553	2.14544e-154
Rpl6	0.886598	0		Cdh3	1.19873	6.73783e-73		Lgi2	0.676375	6.11787e-47		Skint3	1.02436	0						Csnk1a1	0.991602	1.62242e-210		Hebp2	1.39602	0		Dynll1	0.927842	1.17414e-81		Adgrl2	1.49871	2.56227e-197						Jag2	0.577271	7.69084e-154
Rpl10a	0.884548	0		Fhl2	1.22931	2.9068e-72		Lum	0.678045	6.91741e-47		Tspan5	1.02415	0						Ambra1	1.24086	2.48976e-210		Skint5	1.3932	0		Cd24a	0.783266	6.944e-72		Pof1b	1.20901	1.85375e-196						Il31ra	1.09886	1.70642e-151
Rps5	0.884098	0		Tmigd1	0.418058	6.02072e-72		Ptprz1	0.673457	7.04079e-47		Rpl12	1.0095	0						Lrrc1	1.28927	4.40516e-210		Cldn4	1.38677	0		Fam25c	0.689236	2.51408e-71		Cdh1	1.30307	2.08705e-195						Cdh13	1.59244	2.90914e-151
Smoc2	0.883555	0		9530059O14Rik	1.06124	6.34422e-72		Sprr1b	0.829118	9.36434e-47		Rps2	1.00865	0						mt-Nd2	0.875968	2.5858e-209		Dkkl1	1.35519	0		Rbp1	0.680058	8.87874e-71		Ly6g6c	1.8083	2.90207e-195						Stox2	1.1767	3.09653e-151
Rps15a	0.880257	0		Wnt5a	1.0861	1.04448e-71		Krt14	1.06397	1.4131e-46		Cd2ap	1.00807	0						Ankrd11	1.06064	3.3362e-206		Bpifc	1.35131	0		Trim29	0.830113	6.50481e-70		Erbb3	0.739389	5.07695e-195						Kif21a	1.23432	8.88232e-151
Oxct1	0.878167	0		Col17a1	3.17067	2.26775e-70		Cxcl5	0.443286	3.3348e-46		Skint5	1.00716	0						Il13ra1	1.13699	1.36481e-205		Cpm	1.33809	0		Tuba4a	0.921468	2.08871e-68		Camsap3	0.505732	3.12326e-194						Fgfr1	1.28552	1.62945e-149
Slc38a2	0.877927	0		Dsg3	2.00082	7.22498e-70		Fstl1	0.907399	3.94258e-46		Cldn1	1.00148	0						Bcl11b	1.03156	8.08087e-204		Slc15a1	1.33069	0		Blmh	1.03237	4.33613e-68		Cd200	0.678214	2.33114e-191						Rere	1.11821	1.76003e-148
Tnfrsf19	0.877346	0		Slco2a1	1.95581	4.5153e-69		Dpp6	0.354639	4.85636e-46		Eppk1	0.99386	0						Pum2	1.22281	4.88145e-202		Sdr9c7	1.3228	0		Ly6g6c	0.885395	3.80058e-67		BC016579	0.515659	3.84342e-189						Gfra1	0.942221	4.93678e-148
Rnf217	0.876876	0		Itgb6	0.940842	5.45455e-69		Tagln	0.343235	9.82704e-46		Tnik	0.992125	0						mt-Cytb	0.789178	1.65471e-201		Sdcbp2	1.31897	0		Serpinb5	0.764037	5.19916e-67		Plxdc2	1.65236	1.7005e-188						mt-Atp6	0.776081	3.13391e-147
Rpl36	0.875646	0		Ces2g	0.624067	2.25088e-68		Dclk1	0.804139	1.04037e-44		Tjp2	0.987304	0						Slmap	1.16771	2.66999e-201		Sult2b1	1.31563	0		Higd1a	1.007	2.07456e-66		Klk5	0.617593	3.18693e-188						Itga3	0.66691	9.44059e-147
Rpl15	0.872077	0		Itga6	3.28244	5.59107e-68		Krt17	0.834991	1.99329e-44		Itprid2	0.979816	0						Ubr5	1.30279	4.27502e-201		Dgat2	1.29602	0		Krt5	0.708942	3.0634e-66		Elovl7	1.04352	1.08589e-187						Macf1	1.46013	1.0751e-146
Rps8	0.870587	0		Pgf	0.669081	7.44543e-68		Col3a1	1.0515	3.38046e-44		Ifi202b	0.978527	0						Slc22a23	1.28029	1.64997e-200		Gsdma	1.28534	0		Gltp	0.894074	2.82298e-65		Pla2g2f	1.01426	1.06855e-185						Plch2	0.711743	4.82073e-146
Cecr2	0.866981	0		Plch2	0.935161	1.88039e-67		Lgals1	1.05346	3.89901e-44		Rpl32	0.976318	0						Mctp2	1.06739	2.54274e-200		Them5	1.28464	0		Mpzl2	0.750452	8.59037e-65		Neurl1b	0.364176	3.69307e-185						Stim1	1.42451	1.78467e-145
Limd1	0.866235	0		Ltbp1	1.66698	1.18955e-65		Serpine1	0.547957	4.03571e-44		Clca2	0.974508	0						Maml3	1.13114	7.26562e-200		Alox12b	1.27011	0		Dsc1	0.784711	2.5767e-64		Lgals7	1.51325	5.23119e-185						Tenm4	1.49169	8.3792e-145
Net1	0.866204	0		8030451A03Rik	0.512939	1.2282e-65		Cacna2d1	0.566778	4.90723e-44		Rpl10a	0.97079	0						Kif13b	1.62257	1.72066e-199		Asah2	1.23336	0		Aldh3b2	0.510206	5.20035e-64		Ehf	1.15654	1.58441e-183						Galnt18	1.29711	1.91659e-144
Ikzf2	0.857873	0		Tll1	1.59496	5.80198e-65		Fndc1	0.440492	6.40209e-44		Gcat	0.97036	0						Sema3c	1.55776	1.20658e-198		AA986860	1.2263	0		Fgfbp1	0.824499	7.61251e-64		Macc1	0.888152	6.0525e-183						Magi1	1.03535	6.47859e-144
Rpl17	0.853863	0		Ptprz1	0.861527	6.04397e-65		Bicc1	0.625858	1.09963e-43		Rpl14	0.966002	0						Fgfr2	1.18117	2.26409e-198		Yod1	1.21833	0		Cmss1	0.644296	9.97307e-64		Mal2	0.69464	8.83155e-183						Nhsl1	1.27254	1.71413e-143
Rps6	0.852839	0		Gm19610	0.352087	1.47434e-64		Grip1	0.890431	1.60912e-43		Rps8	0.965151	0						Pard6g	0.932635	3.01624e-198		Trex2	1.20682	0		Camk1d	0.841787	1.74618e-62		Arap2	1.14469	1.02834e-182						Itgb4	0.810459	3.25479e-143
Tfap2a	0.852326	0		Jag2	0.862069	5.61524e-64		Tbx15	0.625071	1.68491e-43		Me1	0.96356	0						Nipal2	1.0178	9.88142e-198		Lipm	1.20214	0		Ggct	0.809486	9.61328e-62		Lrrc1	1.18275	1.44932e-182						Fzd7	0.490894	6.62612e-143
Rps19	0.849697	0		Trp63	2.33935	7.98408e-64		Igsf10	0.635482	1.86763e-43		S100a14	0.962962	0						Esyt2	1.4123	1.17693e-197		Klk9	1.19639	0		S100a11	0.503319	1.08846e-61		Esrp1	1.04558	2.09405e-182						Col4a6	0.645409	6.84268e-143
Rpl30	0.845301	0		Gys1	1.04167	9.95737e-64		Bmpr1b	0.562474	2.93345e-43		Cpeb2	0.961186	0						Dsg3	1.13263	1.75201e-195		Tgm1	1.19626	0		Mal2	0.517563	1.71736e-60		AA986860	0.707126	2.4434e-182						Tacc2	1.31747	2.28217e-142
Rpl22	0.844674	0		Herc3	0.942526	3.93416e-63		Fbn1	0.60145	6.62814e-43		Cltb	0.960736	0						Trp53bp2	1.13441	2.29592e-195		Cpa4	1.19093	0		Nectin4	0.577879	2.67473e-60		Gsdma	0.589586	1.65148e-181						Ddr1	0.912271	9.0664e-142
Tenm4	0.843874	0		Arntl2	0.630712	5.84304e-63		Sparc	1.03673	2.1696e-42		Rps7	0.957856	0						Tfap2a	0.975948	1.10667e-194		Acp7	1.1882	0		Rps26	0.452517	3.56463e-59		Kif26b	0.96047	5.96078e-179						Boc	1.0459	1.21306e-141
Ncl	0.842468	0		Aknad1	0.400687	1.10017e-62		Fabp5	0.842447	5.82921e-42		Esrp1	0.957339	0						Arhgef11	1.22186	9.78218e-192		Arhgef37	1.1646	0		Tmprss4	0.656192	1.05712e-58		Ly6d	1.43337	1.17822e-178						Auts2	1.64635	6.68429e-141
Rps12	0.841478	0		Dsg2	0.403901	2.29618e-62		Ccl7	0.772527	8.92384e-42		Rps5	0.955898	0						Ikzf2	1.00521	2.49475e-190		Slc46a2	1.13986	0		Cyp4f39	0.343874	5.755e-58		Sprr1a	2.45864	3.36429e-178						Fryl	1.10242	1.16379e-140
Rps20	0.840198	0		Nat8l	0.926538	5.84884e-62		Fbn2	0.507596	5.46847e-41		Rplp1	0.945321	0						Prkci	1.09175	3.96639e-189		Tmem40	1.12629	0		Ide	0.782935	2.05515e-56		Ppl	0.838192	2.50028e-177						Luzp1	1.2551	2.6719e-140
Pawr	0.840011	0		Eml2	0.67357	5.90862e-62		Ckap4	1.03778	8.71308e-41		Urah	0.944042	0						Huwe1	1.1821	1.07178e-188		Pcdh1	1.10674	0		Actg1	0.374114	2.64731e-55		Ovol1	0.802129	3.32268e-177						Ptpn4	1.06779	4.33511e-140
Rps15	0.83722	0		Flrt2	2.29454	8.13148e-62		Dsg3	0.939061	1.01895e-40		Rpl15	0.938437	0						Pdlim5	1.27914	2.33985e-188		Rnf227	1.0966	0		Anxa1	0.84592	6.24537e-54		Tec	1.04864	4.21733e-177						Foxc1	0.457902	2.58826e-139
Rps16	0.83685	0		Vwa2	0.303369	4.9866e-61		Igfbp5	0.557626	1.06838e-40		Bag1	0.92965	0						Tcerg1	1.06614	3.4609e-188		Faah	1.06617	0		Areg	0.583761	6.59402e-54		Tgfa	0.899326	4.44355e-176						Enox1	1.767	1.17531e-137
Rpl18	0.836196	0		Snai2	0.605598	2.10975e-60		Col6a1	0.696626	1.0759e-40		Mindy3	0.926177	0						Aebp2	1.01194	2.32511e-187		Pglyrp3	1.05257	0		Krt77	0.411888	1.31885e-53		Bicdl1	0.725127	1.66304e-174						Dsg3	0.983339	6.90146e-137
Rpl37	0.831197	0		Eogt	0.604776	2.59809e-60		Cpxm1	0.649651	1.14545e-40		Rps26	0.924034	0						Abca12	1.74361	4.21238e-186		Fam110a	1.03047	0		Rps12	0.38274	1.64801e-53		Afdn	1.188	9.81232e-174						Cables1	0.712498	2.14618e-136
Etl4	0.83006	0		Col23a1	1.14423	3.01646e-60		Spink5	0.504057	1.68643e-39		Rpl13a	0.921348	0						Casz1	1.13597	2.89525e-184		Anxa9	1.01641	0		Grip1	0.625262	2.34041e-53		Stard5	0.720092	1.8728e-173						Tle1	1.12038	6.02431e-136
Rps4x	0.828335	0		Cstdc6	0.432273	4.30477e-60		Gpc6	0.515672	1.87472e-39		Maoa	0.921262	0						Nlrc5	1.02247	2.66821e-183		Cyp4f39	0.983528	0		Rplp1	0.356377	4.5418e-53		Zbtb7c	0.679647	4.57731e-173						Kcnh1	0.795647	7.3659e-135
Pard3	0.823257	0		Bcl2l15	0.545122	2.90571e-59		Stfa1	0.823365	5.84751e-39		Ptpn13	0.917206	0						Tra2a	1.01251	2.09431e-182		Tmem54	0.981757	0		Rab27b	0.564234	2.42221e-52		Vangl1	0.601829	2.21075e-172						Tiam2	0.868399	1.39961e-134
Frmd4b	0.819612	0		Arhgef4	1.43592	6.87311e-59		Lrrc17	0.565387	1.54243e-38		Rab38	0.917042	0						Ankrd17	1.17082	1.20823e-181		Ano9	0.954657	0		Pkp3	0.735426	6.16044e-52		Cracr2b	0.292581	5.07828e-172						mt-Co1	0.764715	4.31702e-134
Wee1	0.815621	0		Ednra	0.469023	3.97577e-58		Tgfb2	0.554764	4.23921e-38		Rpl28	0.916664	0						Vcl	1.24996	1.56738e-181		Slc28a3	0.947618	0		Dsg1a	0.655671	2.56575e-51		S100a14	1.10451	4.95249e-171						Epb41l4b	0.88184	2.24235e-132
Pard6g	0.815205	0		Gjb2	1.86878	9.96307e-58		Eya4	0.461698	6.38082e-38		Ppl	0.915171	0						Pkp4	1.38687	1.51595e-180		Abhd12b	0.936668	0		2310046K23Rik	0.79462	3.39293e-49		Tmem45a	1.20981	5.49123e-171						Atxn1	1.24884	1.16585e-131
Rpl13a	0.813682	0		Ak4	0.818802	2.389e-57		Dcn	0.602527	1.235e-37		Endou	0.913252	0						Mark3	1.3216	6.40822e-180		Calcb	0.927594	0		Egln3	0.810254	3.55486e-48		Grhl3	0.54187	1.45589e-170						Cdcp1	1.0651	1.59761e-131
Rpl21	0.812951	0		Igsf9	0.560334	2.94795e-57		Itm2a	0.543334	1.32234e-37		Dbi	0.912459	0						Mcc	1.29235	2.38831e-179		Gjb4	0.917733	0		Klk8	0.801931	4.33266e-47		Anxa8	1.18083	4.46628e-170						Cdh1	1.11913	7.25478e-131
Usp24	0.812459	0		Enah	2.35783	3.37678e-57		Tafa2	0.435566	2.54074e-37		Rpl4	0.907141	0						Maoa	1.48093	5.00009e-179		Cgn	0.916078	0		Sdc1	0.848978	1.23527e-45		Sdr16c5	0.556521	1.80867e-169						Flnb	1.5217	1.21072e-129
Syne2	0.80919	0		Slc2a1	1.9141	4.23134e-57		Rgs5	0.439676	8.21822e-37		Them5	0.905244	0						Suco	1.16839	6.65709e-179		Slurp2	0.905234	0		Ndufa4l2	0.669136	1.21901e-43		Sort1	0.578962	1.87093e-169						Lama3	0.954912	2.6622e-129
Col7a1	0.808872	0		Col18a1	2.05075	6.95349e-57		Rbms3	0.528171	1.0959e-36		Rps20	0.901851	0						Stim1	1.25289	3.95315e-178		Aloxe3	0.904869	0		Gsto1	0.764887	1.83145e-43		Psapl1	1.02986	2.84831e-169						Ppp2r3a	1.29593	2.93207e-129
Rps26	0.808176	0		Stab1	1.01635	2.71888e-55		Diaph3	0.579347	1.17046e-36		Dennd2c	0.896112	0						Pum1	1.07421	4.87287e-178		Rps6ka6	0.886663	0		Rpl41	0.347771	3.78731e-42		Sptbn2	0.631423	2.19327e-168						Prlr	0.885134	4.19623e-129
Apoc1	0.804547	0		Grhl2	0.987787	7.10179e-55		Areg	0.511233	1.59601e-36		Rps12	0.895655	0						Epb41l4b	0.827567	7.51746e-178		Nlrp10	0.834233	0		4833423E24Rik	0.428937	2.77769e-41		Myh14	0.541278	3.84079e-168						Yap1	1.1129	7.15465e-129
Yap1	0.804546	0		Plxnb1	0.400938	8.24173e-55		Palld	0.6714	1.65916e-36		Ablim1	0.894232	0						Tuft1	1.16742	7.91443e-178		Ephx3	0.831104	0		Rps2	0.441518	3.91445e-41		Ndrg2	0.579812	1.08119e-167						Lrig1	1.43686	1.37288e-128
S100a14	0.798032	0		Mmp9	2.87666	1.01254e-54		Ptx3	0.638647	2.08279e-36		Capns2	0.89301	0						Malat1	0.898929	1.2855e-177		Rarres1	0.825532	0		Lad1	0.498023	2.37119e-40		Plekha6	0.594323	1.16214e-167						Cobll1	1.17722	1.11997e-127
Gna14	0.797693	0		Fat2	0.829768	1.09913e-54		Ltbp2	0.496576	3.20044e-36		Rpl8	0.891494	0						Kmt2c	1.06824	1.35535e-177		Lipk	0.823597	0		Mall	0.485038	1.06018e-39		Sh2d4a	0.355482	4.09861e-167						mt-Co3	0.696559	3.3641e-127
Moxd1	0.788775	0		Fads3	0.54733	1.22645e-54		Tpm2	0.699634	5.11798e-36		Bbox1	0.888682	0						Atl2	1.00077	3.46165e-177		Tesc	0.805916	0		Anxa8	0.610385	2.51567e-39		Tcaf2	0.443362	1.87312e-166						Rapgef5	0.932431	4.42376e-127
Rps3a1	0.783395	0		Arhgef16	0.357848	3.1903e-54		Phldb2	0.805627	5.5726e-36		Nectin1	0.888107	0						Sltm	1.15721	1.75353e-176		Rnf225	0.79608	0		Klk7	0.956461	1.33552e-38		Cmtm8	0.343838	1.20473e-164						Slc7a6	1.03161	8.31633e-126
Cdh3	0.774812	0		Tenm4	1.85424	3.70829e-54		Nr3c2	0.553375	1.18794e-35		Pla2g4f	0.88621	0						Clpx	0.976869	1.9513e-176		Epn3	0.795486	0		Rps20	0.346228	1.43683e-38		Fhdc1	0.462977	2.47164e-164						Tns4	0.897116	9.06618e-126
Pola1	0.771783	0		Nrg1	2.51358	5.4975e-54		Kdelr2	0.841805	1.50082e-35		Prnp	0.886112	0						Ptp4a2	1.09464	1.55943e-175		Skint10	0.784795	0		Fam57a	0.56999	1.37877e-37		Skint9	1.0612	3.84435e-164						Pkp4	1.20522	2.91951e-125
Zfp654	0.771336	0		Efnb1	1.1718	5.87219e-54		Cenpe	0.387168	2.31661e-35		Itpkc	0.885373	0						Tsc22d2	1.33545	2.54029e-175		Dnase1l2	0.77863	0		1810037I17Rik	0.808548	7.26102e-37		Nectin4	0.702239	6.09313e-164						Fam167a	0.640628	3.22635e-125
Chit1	0.769439	0		Ass1	0.923639	4.81843e-53		Glis3	0.483552	4.77534e-35		Rgs20	0.883798	0						Zfp654	1.13549	2.74652e-175		Dhcr7	0.777788	0		Cers3	0.402874	1.09725e-36		Mall	0.577613	7.79176e-164						Shmt1	0.516204	6.79094e-125
Rpl27a	0.768676	0		Bmp3	0.313853	1.17207e-52		Il33	0.803233	5.20038e-35		Ehf	0.881905	0						Mid2	1.04497	1.87463e-173		Wfdc5	0.774229	0		Abca12	0.316751	1.45629e-36		Pglyrp3	0.649471	1.8644e-162						Prickle2	1.14457	7.47315e-125
Rps27a	0.765153	0		Ephb2	0.820686	1.78432e-52		Tenm3	0.42364	1.21854e-34		Grhl1	0.881136	0						Robo1	1.27468	2.1238e-173		Olfm2	0.77272	0		Enah	0.68748	2.38272e-36		Sox7	0.489915	3.48038e-162						Arhgef12	1.10875	9.77881e-125
Ctnnal1	0.763953	0		Jag1	1.82345	2.54055e-52		Lama3	1.38271	5.2735e-34		Rps19	0.877612	0						Itpkc	1.04872	4.60118e-172		Il1f6	0.741166	0		Mboat2	0.478078	1.56325e-35		Dapl1	1.56475	9.00493e-162						Gli2	0.900717	1.03833e-124
Arhgef11	0.76181	0		Palld	1.53163	4.08926e-52		Dsg1b	0.52813	6.55674e-34		Rps16	0.874818	0						Itprid2	1.19194	8.9768e-172		Fam89a	0.722959	0		Dhcr24	0.423254	1.70527e-35		Kif21a	1.06507	1.45879e-160						Mrtfa	1.19037	2.56572e-124
Serbp1	0.76089	0		Pmepa1	1.72812	1.17862e-51		Csgalnact1	0.695656	1.05559e-33		Rpl13	0.873739	0						P3h2	1.14017	1.27076e-171		Tmem265	0.693537	0		Zfp750	0.468449	4.65845e-35		Adgrf2	0.806537	2.62627e-159						Fermt1	0.47362	3.487e-124
Trp53bp2	0.751033	0		Itgb1	2.05367	1.78187e-51		P4hb	0.818208	1.62089e-33		Rps15a	0.873172	0						Epb41l4a	0.889065	1.78365e-169		Nipal4	0.69196	0		Pdzk1ip1	0.436944	7.79685e-35		Hip1r	0.597286	1.4863e-158						Mbnl2	1.00801	9.64564e-124
Epb41l4a	0.746397	0		Cdcp1	1.52337	1.98995e-51		Fkbp10	0.605473	3.52213e-33		Rpl30	0.8699	0						Tnik	1.29711	2.76047e-169		Prss8	0.691247	0		Rplp0	0.281789	7.99254e-35		Rnf144b	0.560818	5.0511e-158						Adgrg6	1.06454	3.13882e-121
Txndc17	0.740004	0		Chdh	0.516752	2.6924e-51		Tuba1b	0.87197	1.24438e-32		Rpl23a	0.868807	0						Arap2	0.97173	3.0966e-169		Card14	0.677053	0		Tubb2a	0.836621	3.40943e-34		Crabp2	0.785598	5.7514e-158						Tcf7l2	1.15971	1.57811e-120
Il20ra	0.733217	0		Car12	1.41926	3.25798e-51		Fam162a	0.787823	1.40291e-32		Nipal2	0.867511	0						Rnd3	1.08974	4.78075e-168		Ptrh1	0.66946	0		Glrx	0.614706	5.44155e-34		Tprg	0.993368	1.02282e-157						Gli3	0.869649	7.98723e-120
Baiap2l1	0.732009	0		Mab21l3	0.419722	3.55714e-51		Hsp90b1	0.857014	1.48312e-32		Rps3	0.865395	0						Tle4	1.25399	6.75194e-167		Ceacam19	0.654922	0		Evpl	0.475526	2.22255e-33		Dsp	1.24428	1.35984e-157						Actn1	1.19072	8.38075e-120
Car12	0.722669	0		Cpe	1.49665	7.7931e-51		Arhgap6	0.491091	2.54011e-32		Elovl7	0.863626	0						Ndfip2	1.09819	9.14148e-167		Fndc9	0.643232	0		Fhl2	0.319371	4.38753e-33		Ephb6	0.611653	2.44512e-157						Rbfox2	1.05	1.53555e-119
Uqcrc1	0.722001	0		Plcd3	0.282298	7.82554e-51		Serpinf1	0.519239	3.29314e-32		Hmgn1	0.862499	0						Nhsl1	1.40062	9.4179e-167		Klk11	0.641871	0		Lars2	0.458359	6.59123e-32		Spint2	0.845526	4.99427e-157						Lamc2	0.729489	1.85075e-119
Btbd11	0.721845	0		Anln	0.911436	1.13642e-50		Csta3	0.456446	3.96036e-32		Rpl11	0.862262	0						Usp24	1.07122	4.33673e-166		Gdpd3	0.640591	0		Map2	0.392883	1.18543e-31		Pawr	1.10973	3.21156e-156						Lmo1	0.592804	7.05485e-119
Dgka	0.719232	0		2610035D17Rik	2.29143	1.36906e-50		Dlc1	0.698543	4.95358e-32		Rpl5	0.856629	0						Ppp3ca	1.04271	7.12366e-166		Srcin1	0.63936	0		Serinc2	0.441775	1.98128e-31		Fam135a	1.30415	6.8048e-156						Myo1e	1.17722	2.50342e-118
Itga3	0.716543	0		Mtss1	1.76522	2.69213e-50		Pcolce	0.547693	6.80782e-32		Ckmt1	0.855405	0						Top1	1.12599	1.42757e-165		Il1f8	0.637964	0		Il1f9	0.26633	2.27879e-31		Klf4	1.22165	2.78246e-155						Barx2	0.997453	4.35832e-117
Lrrc1	0.706601	0		Vldlr	0.509518	7.87895e-50		Ly6d	0.844038	7.41004e-32		Npl	0.85436	0						Smg7	1.04002	1.43488e-165		Myo5b	0.627473	0		Hbegf	0.640563	4.91921e-31		Cecr2	0.98862	3.25857e-155						Smad1	0.955322	7.10175e-117
Il1rl2	0.702159	0		Celsr1	0.629964	1.16842e-49		Tmsb10	0.822715	7.49448e-32		Emp2	0.854356	0						Prpf39	1.0252	1.60601e-165		Tgm5	0.622627	0		Gja1	0.695227	6.78304e-31		Zfp750	0.571565	4.68668e-154						Nfix	0.961369	1.02342e-116
Tspan9	0.701195	0		Mmp28	0.505289	2.51611e-49		Birc5	0.535791	8.44816e-32		Casz1	0.854145	0						Rora	0.978613	2.39036e-165		Flvcr2	0.601874	0		Avpi1	0.685043	7.66759e-31		Ephb2	0.569606	1.64755e-153						Mir99ahg	1.34609	3.16548e-116
Fgfbp1	0.698815	0		Ptprf	1.38364	7.11122e-49		Enah	0.854441	1.30636e-31		Klc3	0.853973	0						Arid4b	1.21187	5.42568e-165		Slc39a2	0.598719	0		Apoc1	0.615746	1.08128e-30		Fxyd3	1.08747	1.93774e-153						Dgka	0.876783	3.79494e-116
Esrp1	0.697991	0		Il17re	0.328337	2.19768e-48		Cstdc6	0.466719	2.7811e-31		Adgrf2	0.853836	0						Tmem87a	0.965791	1.19669e-164		Pnpla1	0.583615	0		Fam43a	0.451016	1.11194e-30		Orm1	0.439086	2.7301e-153						Grhl2	0.814341	7.26444e-115
Epb41l4b	0.697133	0		Ajuba	0.573424	9.537e-48		Adarb1	0.660041	2.92571e-31		Evpl	0.852433	0						Ust	1.20125	2.36028e-164		Rdh9	0.5798	0		Tacstd2	0.568358	1.58051e-29		Abca12	1.01883	1.24836e-152						Tnk1	0.680482	2.22649e-114
Prkci	0.696408	0		Fzd6	0.898593	1.04755e-47		Efemp2	0.60709	4.62836e-31		Rpl6	0.852155	0						Elovl7	0.86825	4.09714e-164		Atp10b	0.576411	0		Prom2	0.47737	7.84397e-29		Gm15987	1.19825	1.29705e-152						mt-Nd2	0.723743	2.23843e-114
Sema3d	0.69323	0		Aplp2	2.20555	1.53077e-47		Col6a2	0.615779	6.61538e-31		Rpl27a	0.852128	0						Erbin	0.989971	4.49332e-164		Pglyrp4	0.56575	0		Casp14	0.520253	9.36087e-29		Chchd10	0.442021	2.46361e-152						Ankrd11	0.845918	4.25869e-114
Nod2	0.679567	0		Proser2	0.290164	5.24114e-47		Anln	0.401055	8.42532e-31		Rpl29	0.849855	0						Il20ra	0.729201	5.1604e-164		Hephl1	0.559346	0		Rpl13	0.266243	2.77679e-28		Agpat3	0.750392	1.10597e-151						Gpc6	1.92895	5.53166e-114
Mapkbp1	0.679505	0		Rgs12	1.27808	6.14249e-47		Fbxl7	0.553707	1.93971e-30		Eif5a	0.849131	0						Exoc6b	1.05729	1.35957e-163		Cldn23	0.558411	0		Nebl	0.280081	3.15205e-28		Lipm	0.476584	1.42247e-151						Slc25a13	0.793993	5.98426e-114
Lypd6b	0.675452	0		Cadm1	1.76592	8.39411e-47		Ebf1	0.294188	4.11287e-30		Acer1	0.848686	0						Prrc2c	0.938305	1.79048e-163		Cyp2b19	0.544902	0		Eif5a	0.587654	3.57662e-28		St14	0.653719	2.19424e-150						Patj	0.569108	6.81312e-114
Shtn1	0.675057	0		Kif26a	0.291666	9.96133e-47		Antxr1	0.523088	8.37795e-30		Rpl3	0.848562	0						Col17a1	1.18207	1.16646e-162		Fut2	0.539454	0		Txn1	0.762977	1.13193e-27		Hr	0.617566	5.21453e-150						Ahcyl2	1.17057	1.30004e-113
Spred2	0.670106	0		Nhs	0.926215	1.01931e-46		Lhfp	0.473988	2.22792e-29		Rps3a1	0.84709	0						Cdyl	1.14299	1.22327e-162		Rnf39	0.538464	0		Ralbp1	0.744818	8.73469e-27		Rab25	0.751383	8.19398e-150						Dsg2	0.470921	1.3194e-113
Tacc2	0.668836	0		Ift43	0.791512	1.16215e-46		Pakap.1	0.482417	2.78463e-29		Rpl37	0.843369	0						Rab38	0.984669	7.20119e-162		Ptk6	0.537885	0		Sqle	0.540287	9.78164e-27		Phtf2	0.94423	4.49643e-149						Sh3d19	0.99123	1.82188e-112
Znrf3	0.665551	0		Egln3	1.73518	2.02515e-46		Cstdc5	0.598622	3.56175e-29		Tec	0.837866	0						Ranbp9	1.04451	5.86832e-161		Liph	0.513207	0		Rps10	0.32642	1.34289e-26		Epb41l5	0.706106	6.66603e-149						C1qtnf12	0.608374	3.8399e-112
Cpe	0.660638	0		Mir205hg	0.751148	8.29246e-46		Sfrp2	0.46468	2.17155e-28		Rps4x	0.835138	0						F11r	0.897621	7.51985e-161		Gprin2	0.510872	0		Cltb	0.68944	1.50875e-26		Dbi	1.6209	7.08615e-149						Itgb8	0.600321	1.32536e-111
Ralgps2	0.656999	0		Gm44613	0.557828	2.40247e-45		Bcat1	0.524536	3.45285e-28		Cd109	0.834777	0						Cds1	0.88469	2.4275e-160		Bicdl2	0.482864	0		Hsd17b7	0.377882	2.6067e-26		Evpl	0.763297	3.60439e-148						Dmd	0.720236	1.66711e-111
Gm44613	0.652661	0		Pxdc1	1.19377	2.9207e-45		Col24a1	0.389505	3.95143e-28		Dgcr6	0.834187	0						Pcnx	1.1564	4.61324e-160		Atp13a4	0.481502	0		Rps24	0.281518	2.65868e-26		Me1	0.903661	5.04515e-147						Erc1	1.15403	2.32904e-111
Htra1	0.646662	0		Jph1	0.364276	3.66313e-45		Psd3	0.655321	4.61413e-28		Serbp1	0.833966	0						Ldlr	0.996481	3.08289e-159		Hsbp1l1	0.462618	0		Cdh1	0.33018	8.37924e-26		Ddr1	0.653154	6.85271e-147						Esrp1	0.72863	2.44055e-110
Kif13a	0.645712	0		Tgfbi	1.88643	1.52645e-44		Cdk1	0.429817	4.61619e-28		Dstn	0.833331	0						Naa25	0.852941	4.63127e-159		Spag1	0.454717	0		Serpinb1a	0.380605	2.40905e-25		Nipal1	0.456021	1.00055e-146						Pde7a	0.864041	2.67843e-110
Fgfr3	0.63705	0		Morc4	0.460876	3.49079e-44		Prkd1	0.436411	7.76181e-28		Cxadr	0.829744	0						Erc1	1.06587	1.83938e-157		Gm11992	0.454221	0		Idi1	0.623225	3.90606e-25		Sox21	0.404083	2.53015e-146						Agrn	0.605496	2.96419e-110
Ckmt1	0.634404	0		Galnt3	0.852963	8.7773e-44		Depdc5	0.453591	3.09286e-27		Rps15	0.829629	0						Arhgap5	0.940573	2.40017e-157		Xkrx	0.450145	0		Fam83g	0.432931	1.48195e-23		9530059O14Rik	0.714332	5.46531e-146						Egfr	1.03795	4.15508e-110
Fat2	0.62982	0		Btbd11	1.35165	1.1045e-43		Wnt5a	0.540045	4.27717e-27		Ahnak2	0.828895	0						Fdft1	0.898859	3.6638e-157		Arhgap40	0.433721	0		Ckmt1	0.471446	2.40344e-23		Homer2	0.941895	5.61547e-146						Fnbp1l	1.07975	1.19258e-109
Amotl1	0.629634	0		Tinagl1	0.455593	1.26164e-43		Rcn1	0.756668	1.11235e-26		Rpl21	0.82709	0						Cobll1	0.955734	4.93159e-157		Muc15	0.411598	0		Sptbn2	0.42527	4.38536e-23		Defb1	0.879082	2.32142e-144						Efnb2	1.12494	2.04281e-109
Tspear	0.626219	0		Zfp532	0.647747	1.7865e-43		Samd4	0.444236	1.13659e-26		Fam83b	0.825587	0						Clcn3	0.962224	8.64285e-156		Sp6	0.404876	0		F3	0.651517	6.74947e-23		Ralgps2	0.856225	4.33665e-144						Nedd4l	1.41469	2.79362e-109
Lancl1	0.617099	0		Bcar3	1.0439	1.93591e-43		Crispld2	0.56627	1.26897e-26		S100a16	0.825483	0						Pex14	0.941679	3.8827e-155		4930438A08Rik	0.36665	0		Rpl27a	0.286943	1.53496e-22		Kank1	0.888364	8.30102e-144						Sntb1	0.928914	2.89214e-109
Cdh4	0.61532	0		Fam83a	0.371998	3.47784e-43		Tubb5	0.831685	1.48966e-26		Hpgds	0.825291	0						Mreg	0.766465	2.60743e-154		Scnn1g	0.341742	0		Nectin1	0.59396	5.08716e-22		Fzd7	0.32412	2.08704e-143						Gmds	1.15376	6.04962e-109
Itga2	0.612468	0		Tns4	1.24024	1.00402e-42		Tpm4	0.72835	1.92704e-26		Rps11	0.823147	0						Phtf2	1.10106	9.25449e-154		Capn9	0.336736	0		Eppk1	0.455041	8.18984e-22		Eps8l2	0.547903	2.19677e-143						Cpe	1.01118	6.79178e-108
Plek2	0.611394	0		Plek2	0.701644	1.55292e-42		Pknox2	0.402517	3.10345e-26		Rpl18	0.823121	0						Gm44613	0.926872	1.88678e-153		Rdh1	0.323452	0		Rps3a1	0.278007	8.67589e-22		Spint1	0.413152	4.76362e-142						Dkk3	0.888637	2.68296e-107
Nipal2	0.610974	0		Mical3	0.938681	2.12915e-42		Dlgap1	0.343366	3.32313e-26		Rps27a	0.822963	0						Wac	0.984369	2.81939e-153		Fcho1	0.316998	0		Rps23	0.308186	1.21237e-21		Atp10b	0.396613	4.80467e-142						Kif13a	0.935105	1.21105e-106
Wwc1	0.610715	0		Fam162a	2.01552	2.36187e-42		Ccbe1	0.343873	4.67941e-26		Sdr16c5	0.822372	0						Arhgef5	0.733446	2.85918e-153		Rnf222	0.313465	0		Tmem154	0.342806	1.48466e-21		Mfsd6	0.68073	9.09963e-142						Bmpr1a	0.939313	1.22805e-106
Scin	0.609529	0		Nme7	0.432215	2.82051e-42		Cenpf	0.357152	4.7122e-26		Chit1	0.822028	0						Enah	1.14467	3.11012e-153		Vsig10l	0.306623	0		Gcat	0.421154	6.59645e-21		Adgrf4	0.620693	1.24893e-141						Cxcl14	1.38642	3.07092e-106
Cxcl14	0.608429	0		Gnai1	1.35824	5.46453e-42		Nid1	0.464109	6.4035e-26		Ralgps2	0.821088	0						Camsap2	0.972759	1.61379e-152		Rhbdl2	0.828217	1.65148e-303		Rpl10a	0.339379	1.1239e-20		Sgpp1	0.849197	3.77416e-141						Eda	1.29481	3.16405e-106
Limch1	0.606362	0		Pcdh7	1.8716	6.15176e-42		Galnt17	0.274303	1.11919e-25		Pdzk1ip1	0.820479	0						Vdr	0.719488	2.01556e-152		Adgrf2	1.4313	9.54822e-303		Rps27a	0.270793	2.84909e-20		Foxq1	0.291502	5.32787e-141						Ccdc3	0.759773	1.60794e-105
Mmp28	0.604193	0		Atxn1	1.95723	8.30135e-42		Mir99ahg	0.438175	1.2966e-25		Map2	0.819931	0						Atp11b	1.20541	1.11605e-151		Cers3	1.03686	1.23877e-298		Pycard	0.622064	3.21284e-20		Crb3	0.418703	9.20737e-141						Palld	1.35858	4.62665e-105
Ptpn3	0.601508	0		Acsbg1	0.701031	8.83015e-42		Mmp2	0.49329	1.33117e-25		4833423E24Rik	0.819783	0						Rnf217	1.0978	1.938e-151		Nectin4	1.15015	3.99688e-298		Rplp2	0.274252	4.56442e-20		Slc15a1	0.35682	2.02091e-140						Adgrl2	1.20251	1.89132e-104
Prxl2a	0.601284	0		Hsd17b7	0.760266	1.23309e-41		Adamts2	0.483566	1.49875e-25		Rpl9	0.819506	0						Tjp1	1.03339	2.33526e-151		Tmprss13	0.832231	5.24645e-297		Ablim1	0.438259	1.12281e-19		Ankrd22	0.73069	3.65959e-140						Arhgap21	0.866649	7.75335e-104
Jag2	0.596549	0		Ggct	1.65457	1.46637e-41		Smc2	0.506483	1.58418e-25		Sgpp1	0.815573	0						Senp2	1.03474	2.55798e-151		Nfe2l3	0.494741	7.18209e-297		Eef1g	0.516652	1.42373e-19		Kif13b	1.19628	4.52065e-140						Rfx7	0.975106	2.36134e-103
Ccdc3	0.595696	0		Afap1l1	0.250626	2.62017e-41		Aqp3	0.591666	1.7035e-25		Tacc2	0.815075	0						Itga6	1.46316	1.84435e-150		Smpd1	1.12811	2.1814e-296		Rps5	0.274461	1.42778e-19		Rnf39	0.31697	5.18166e-139						Ptpn14	0.887378	2.51646e-103
Bcam	0.583221	0		Tnik	1.14145	3.66219e-41		Nhs	0.318806	2.78314e-25		Rpsa	0.811142	0						Nedd4l	1.15932	2.8941e-150		Tuba8	0.561417	7.69791e-296		Glo1	0.624043	1.85324e-19		Pcdh1	0.52507	6.59594e-139						Zfp609	0.89431	6.46247e-103
Kcnh1	0.583196	0		Frmd4b	1.64951	3.99114e-41		Ndrg1	0.645258	4.38297e-25		Pou3f1	0.806639	0						Btbd11	0.853333	1.61982e-149		Tjp3	0.384514	4.39795e-295		Irf6	0.300064	2.58287e-19		Megf9	0.851338	2.14485e-138						Dennd2c	1.0543	9.97581e-103
Col4a6	0.582167	0		Asap2	0.945594	5.08549e-41		Ppic	0.646325	4.43308e-25		Fdps	0.798566	0						Serpinb5	0.846004	2.52931e-149		Vgll3	1.16418	2.10514e-294		Pof1b	0.416695	4.95024e-19		Aqp3	1.03867	2.27333e-138						Trp53bp2	1.05983	1.21163e-102
Tmpo	0.579505	0		Cotl1	1.37547	1.06501e-40		Plat	0.513798	6.63221e-25		Fdft1	0.797001	0						Wwtr1	1.12879	3.93896e-149		Cptp	0.365275	8.08119e-291		Rps4x	0.269884	2.78492e-18		Dusp22	0.751284	4.90417e-138						mt-Cytb	0.641192	1.31515e-102
Col23a1	0.579084	0		Gsta4	0.620897	1.44987e-40		Setbp1	0.425188	1.01025e-24		Rpl23	0.793472	0						Smad1	0.941224	4.60695e-149		Ly6g6e	0.51002	2.40926e-290		Rps18	0.269751	3.71021e-18		Sntb1	0.673169	5.05621e-138						Bcr	0.870283	1.91202e-102
D16Ertd472e	0.577605	0		Krt5	2.06847	2.07161e-40		Pdzrn3	0.290544	1.27703e-24		Rack1	0.791741	0						Megf9	0.903252	6.44512e-149		Stx19	0.271801	1.03154e-288		Elovl7	0.448427	5.67656e-18		Map7	0.857075	4.5429e-137						Lrig3	0.688042	8.37683e-100
Ptprf	0.577235	0		Pak6	0.522192	3.99272e-40		Actn1	0.625629	1.44994e-24		Tenm4	0.790865	0						Kif21a	0.871592	7.53078e-149		Tuft1	1.54956	4.85823e-288		Rps3	0.310521	5.93427e-18		Pak3	1.00271	6.58474e-137						Wwc1	1.05113	4.70116e-99
Wnt3	0.573008	0		Kank1	1.1491	6.72054e-40		Bmp1	0.537239	1.54206e-24		Rps25	0.790092	0						Arl5b	1.02754	9.33077e-149		Nipal1	0.748846	9.20046e-287		Grhl1	0.429421	9.26671e-18		Lypd6b	1.06238	6.89732e-137						Arhgef5	0.643318	4.76071e-99
Sh3rf2	0.57249	0		Tnfrsf23	0.680807	7.11501e-40		Krt5	0.461464	2.12048e-24		Pkp3	0.78776	0						Ube2q2	1.25296	1.049e-148		Atp1b1	0.737903	2.32797e-284		Rpl11	0.301802	1.21491e-17		Stim1	1.05798	1.04108e-136						Usp47	0.955865	6.48378e-99
Prc1	0.571314	0		Actn1	1.42647	7.94004e-40		Pclaf	0.343508	2.29029e-24		Krt80	0.786339	0						Fubp1	0.975381	2.28322e-148		Skint2	0.303055	2.71267e-284		Endod1	0.301357	3.2166e-17		Perp	1.03761	1.57547e-136						Lamb3	0.520958	3.59735e-98
Pou3f1	0.569505	0		Krt14	1.93856	8.04816e-40		Pdgfra	0.421267	2.79027e-24		Sult2b1	0.781038	0						Agfg1	0.96376	2.61149e-148		Ppif	1.05912	1.51207e-281		Klc3	0.453964	3.59446e-17		Bspry	0.292192	2.29951e-136						Cdk19	0.97806	4.03462e-98
Arhgef4	0.557132	0		Rrm2	0.61658	1.51505e-39		2610528A11Rik	0.385527	7.01116e-24		Eef1a1	0.779463	0						1700025G04Rik	1.04657	4.89321e-148		Tent5b	0.464473	3.26544e-281		Ehf	0.337056	8.53475e-16		Itgb8	0.511603	5.06338e-136						Chd6	0.940668	5.88503e-98
Serinc2	0.55324	0		Myo1b	1.39758	2.38567e-39		Lamc2	1.65497	7.65625e-24		Cyp51	0.779138	0						Tspan9	0.872646	7.17883e-148		Mpzl3	1.33613	1.21881e-280		Ammecr1	0.512812	8.99875e-16		Rapgefl1	0.586729	1.85084e-135						Ubr5	1.06818	7.99288e-98
Snhg1	0.551197	0		Nav2	0.941015	2.63093e-39		Pmepa1	0.749378	8.94358e-24		Tecr	0.778058	0						Daam1	0.985557	7.87241e-148		Skint11	1.58031	2.36821e-279		Wnt4	0.323334	9.33746e-16		Prss8	0.342676	5.05747e-135						Slc38a2	1.28973	1.67929e-97
Phgdh	0.547158	0		Ak1	0.639776	4.63998e-39		Loxl1	0.410305	9.50939e-24		Lypd6b	0.770995	0						Scel	1.26533	1.07184e-147		Bicdl1	0.985418	7.11865e-279		Twf1	0.653576	1.1087e-15		Irx3	0.447221	5.06487e-135						Ankrd10	0.761158	2.82294e-97
Slc25a48	0.543186	0		Fgfr3	0.63817	5.05805e-39		Dcbld2	0.590377	1.24117e-23		Pla2g2f	0.769853	0						Serinc2	0.806667	7.92588e-147		Skint3	1.46972	2.96119e-278		Rpl39	0.296838	1.67915e-15		Eppk1	0.734915	6.41327e-135						Lrp6	0.874043	8.56385e-97
Col4a5	0.540583	0		Dock5	0.83202	6.10355e-39		Adamts12	0.478234	1.70785e-23		Itm2b	0.763368	0						Fcgbp	1.4303	9.07408e-147		Rgs2	1.47251	7.90446e-277		Homer2	0.399563	1.88666e-15		Dsc1	0.74002	1.96826e-134						Ppp3ca	0.836205	1.44753e-96
Acpp	0.539865	0		Bub1	0.303322	9.90268e-39		Sprr2h	0.304526	1.7907e-23		Hras	0.75589	0						Gramd3	1.00584	9.65886e-147		Il1f9	1.05249	1.04865e-275		Hsp90ab1	0.287429	3.74675e-15		Ece1	1.11841	5.0463e-134						Enah	1.05207	5.07592e-96
Bcl11a	0.536327	0		Kirrel	0.501034	1.1009e-38		Aldh1l2	0.476721	1.87627e-23		Il34	0.754022	0						Cnot2	0.953176	1.35917e-146		Tprg	1.31297	4.3534e-275		Rpl8	0.289982	3.96735e-15		Skint10	0.62534	2.85489e-133						Tiam1	0.957243	6.82329e-96
Celsr1	0.525285	0		Src	0.596211	2.09013e-38		Gpx3	0.281825	1.95341e-23		Wdr61	0.750641	0						Cnot6l	0.936746	3.28432e-146		Scnn1a	0.545637	4.9848e-275		Rps15a	0.26971	4.1403e-15		Gm20219	0.364049	3.40481e-133						Acsl3	0.853723	7.08294e-96
Dsg2	0.523414	0		Egln1	1.30481	2.8968e-38		Creb3l1	0.556647	2.82643e-23		Tuft1	0.746962	0						Ube2g1	0.950455	3.40211e-146		Ppfia3	0.370543	6.31501e-272		Qsox1	0.436644	8.47671e-15		Apoc1	0.976159	8.89772e-133						Usp24	0.93458	7.35554e-96
Slc27a3	0.522951	0		Cenpe	0.848589	3.79615e-38		Ldha	0.654309	3.87429e-23		Arap2	0.745188	0						St14	0.888601	2.33127e-145		Ctnnbip1	1.60638	1.94177e-270		Rpl32	0.279505	8.88045e-15		Lmtk2	0.796663	3.70586e-132						Top1	1.09256	8.45097e-96
Urah	0.521583	0		Agrn	0.697219	5.32569e-38		Ccdc80	0.466484	3.9559e-23		Sar1b	0.744053	0						Ocln	0.720702	2.83928e-145		Lce1b	3.73612	2.54151e-270		Rpl26	0.272775	9.46212e-15		Serpinb5	0.988832	6.76415e-132						mt-Nd4	0.61396	1.08808e-95
Smo	0.5181	0		Htra1	1.18599	5.56561e-38		Ccl2	0.469366	4.53166e-23		Slc12a2	0.738817	0						Vps13a	0.945496	1.56146e-144		Blmh	1.95445	4.34759e-269		Rpl5	0.288826	1.30351e-14		Fam83b	0.708549	6.84233e-132						Kalrn	0.921331	1.30894e-95
Grhl2	0.515828	0		Slf1	0.447361	5.78222e-38		Slc4a4	0.431837	4.78562e-23		Ptprf	0.737721	0						Nfkb1	0.892217	1.71347e-144		Myo6	1.53152	3.93433e-268		Gphn	0.330669	1.47649e-14		Tfap2c	0.577625	3.75367e-131						Smg1	0.957326	1.33419e-95
Clca2	0.514631	0		Fgfbp1	1.27503	7.17177e-38		Serping1	0.253909	5.85596e-23		Pak3	0.737245	0						Rfx7	0.964599	2.40758e-144		Rnf208	0.327368	4.89307e-266		Rpl15	0.303521	1.60644e-14		Bnipl	0.353344	3.99916e-131						Scel	1.08509	1.58315e-95
Mboat1	0.506922	0		Lad1	0.832515	9.20886e-38		Sec31a	0.625474	6.26866e-23		Ankrd35	0.736936	0						Slk	1.018	2.99775e-143		Homer2	1.25883	7.20241e-265		Rpl3	0.323158	2.12071e-14		Shb	0.774373	6.37338e-131						Postn	1.44974	2.0651e-95
Dcbld1	0.505506	0		Epgn	0.417738	1.21913e-37		mt-Nd4l	0.808465	6.59366e-23		Prxl2b	0.728804	0						Wdr61	0.790558	2.47324e-142		Mal2	0.922848	1.80919e-264		Polr3g	0.344608	2.52801e-14		Fam89a	0.41335	9.60735e-131						Net1	0.749251	2.12005e-95
Lrp4	0.496047	0		Mthfd1l	0.82244	1.23854e-37		Angptl2	0.478281	6.66594e-23		Map1lc3a	0.724937	0						Cpeb2	1.33718	4.20719e-142		March3	1.9357	3.53371e-264		Fdps	0.547074	2.69706e-14		Net1	0.757585	1.10109e-130						Dach1	0.805215	3.10411e-95
Lgr6	0.493916	0		Krt6a	1.8401	1.98249e-37		Sod3	0.467327	8.07668e-23		Clec2g	0.723423	0						Gpatch8	0.885805	2.39723e-141		Grhl3	0.693653	1.07992e-263		Rpl28	0.269309	2.75343e-14		Slc12a2	0.840723	1.20692e-130						Mark3	0.937914	3.29078e-95
Tenm2	0.486445	0		Parm1	0.401602	3.57104e-37		S100a16	0.609278	8.51765e-23		Gm94	0.720896	0						Rab40c	0.798201	3.563e-141		Hopx	1.16915	5.74434e-263		Rpl12	0.258486	8.84101e-14		Palmd	0.735824	1.6045e-130						Fat1	0.856988	6.8366e-95
Rgmb	0.48575	0		Cdca2	0.358604	3.74411e-37		Fscn1	0.50898	1.06072e-22		Agpat3	0.718171	0						Tra2b	0.882724	1.58339e-140		Atp6v0a4	0.556234	3.33433e-262		Ppp1r14c	0.27763	1.01606e-13		Trim29	0.894166	2.89436e-130						Peli2	1.15274	9.01669e-95
Fbxo36	0.464785	0		Prep	0.982372	3.8998e-37		Grem2	0.403875	1.19059e-22		Abhd6	0.71677	0						Kdm6a	1.00105	1.7711e-140		Kctd11	1.05159	1.45923e-261		Asprv1	0.269298	1.13496e-13		Stard10	0.456541	5.34159e-130						Neurl1b	0.364176	9.04714e-95
Vdr	0.460745	0		Card10	0.399088	3.97628e-37		Camk1d	0.497665	1.39625e-22		Itpr3	0.716469	0						Trpv3	0.481873	2.22967e-140		Pcsk6	0.780223	1.54104e-261		Ppl	0.412725	1.14161e-13		Ripk4	0.554281	5.97142e-130						Osbpl3	1.03474	2.62969e-94
Dgcr6	0.458213	0		Plau	0.494238	5.94261e-37		Ngf	0.55804	1.43709e-22		Acad9	0.715015	0						Fam83b	0.861301	2.95447e-140		Tex264	1.19344	2.12197e-256		Cd81	0.565302	1.38233e-13		Ahr	0.948548	7.59345e-130						Pum1	0.939706	2.67523e-94
Slc25a13	0.454017	0		Ttll7	0.468038	6.22157e-37		Prkg1	0.290601	1.65809e-22		Nhp2	0.714099	0						Luc7l3	0.901094	3.891e-140		Shroom3	1.28655	4.58407e-254		Flg	0.635436	2.98033e-13		Clic3	0.477447	1.16369e-129						Crybg1	0.984999	3.60477e-94
Mreg	0.449692	0		Ppp1r14c	1.25958	8.38204e-37		Col17a1	0.759678	2.35551e-22		Dusp22	0.712494	0						Appl1	0.89285	4.18049e-140		Bspry	0.316829	2.7434e-253		Fxyd3	0.433623	3.34357e-13		Tacstd2	0.996985	1.75662e-129						Foxp1	1.42819	4.60191e-94
Clstn1	0.447399	0		Fam83f	0.475107	1.2827e-36		Ndufa4l2	0.623629	2.44334e-22		Dynlt3	0.706029	0						Net1	0.704748	6.16798e-140		Sdr16c6	0.796877	8.77655e-251		Ldha	0.522021	3.81288e-13		Chmp4c	0.390523	2.76704e-129						Firre	0.552618	6.7149e-94
Tfap2c	0.446807	0		Dlg5	0.526735	1.52743e-36		Vcan	0.419512	3.30262e-22		Gjb5	0.701434	0						Pls3	1.14238	2.25033e-139		Gjb3	0.833355	1.59009e-248		Ppia	0.34022	2.87788e-12		Tmem265	0.400516	3.19485e-129						Igsf9	0.354248	2.96375e-93
Wnk2	0.444007	0		Fscn1	0.734055	2.53724e-36		Nedd4	0.66371	4.30875e-22		Tuba4a	0.700161	0						Dgka	0.779371	2.28909e-139		Aadacl2	0.290482	2.98469e-248		Itpk1	0.252377	5.33091e-12		Ccl27a	1.75166	1.99393e-128						Strbp	0.845228	3.91824e-93
Rps6ka1	0.435718	0		Tnk2	0.586043	2.8738e-36		mt-Nd5	0.678744	5.14903e-22		Map7	0.691198	0						Gm26688	0.489611	4.17456e-139		Slc6a20a	0.382147	1.17391e-247		Rpl14	0.334984	9.1197e-12		Reep5	0.917726	1.65308e-127						Ctnna1	0.90813	4.6878e-93
Wnt10a	0.430598	0		Tpm2	1.32875	3.03721e-36		Mrc2	0.487655	7.76478e-22		Naa25	0.690658	0						Arhgap32	0.971355	4.26356e-139		C2cd2	1.0249	1.4686e-246		Serbp1	0.46038	9.92095e-12		Fam83a	0.287176	2.00093e-127						Dst	0.938935	4.93758e-93
Pkp3	0.427348	0		Endou	0.976647	4.96294e-36		Dstn	0.613977	9.01354e-22		Gsdmc	0.689042	0						Lrrfip2	0.909704	8.67745e-139		Gpr87	0.768269	3.24942e-246		Msmo1	0.435102	4.54921e-11		Barx2	0.619942	3.53373e-127						Msi2	0.857033	1.11164e-92
Bnc1	0.425572	0		Gli3	0.941997	5.52229e-36		Tenm4	0.464392	9.47226e-22		Sema3d	0.688814	0						Stim2	1.0259	1.05973e-138		Egr3	0.881883	2.90809e-245		Esrp1	0.327634	6.02946e-11		Mtfr1	0.440857	7.89967e-127						Acvr1	1.01588	1.26443e-92
Wnt16	0.424913	0		Pdgfa	0.793626	7.60514e-36		Gpc3	0.324921	9.63863e-22		Micos13	0.684751	0						Thrb	0.899893	2.49782e-138		Dusp14	0.87045	4.57621e-245		Eef1b2	0.349522	8.77715e-11		Syne2	0.975263	9.96418e-127						Tmem245	0.803437	3.06449e-92
Mgst3	0.424532	0		Nmnat3	0.37063	9.9337e-36		Grb10	0.435545	1.22588e-21		Polr3g	0.684555	0						Slc25a25	0.883496	4.6375e-138		Epcam	1.54485	2.68667e-240		Fam83b	0.323898	9.40359e-11		Nectin1	0.80256	2.06114e-126						Tra2a	0.900638	6.91891e-92
Rapgefl1	0.421853	0		Vangl1	0.529409	1.12528e-35		Fgfr1	0.585324	1.57385e-21		Krt78	0.684092	0						Znrf3	0.955002	6.33856e-137		Sprr1a	2.53653	4.92639e-240		Rpl4	0.332814	1.24908e-10		Erbb2	0.447652	4.69067e-126						P3h2	0.931056	9.56127e-92
Ripk4	0.420759	0		Slc25a13	0.874784	1.31181e-35		Npm1	0.611726	2.10609e-21		Ppp1r14c	0.681112	0						Zdhhc21	1.05688	7.23595e-137		Me1	1.18049	1.54239e-238		Cstb	0.468943	1.67868e-10		Clip1	1.00055	6.02011e-126						Cask	1.21341	1.97723e-91
Shroom2	0.419986	0		Tanc2	1.46135	2.4998e-35		Igf2bp2	0.45282	2.35222e-21		Susd2	0.679613	0						Luzp1	0.895303	3.77733e-136		Teddm3	0.702353	2.15467e-238		Rpl30	0.254132	2.83379e-10		Hebp2	0.503939	9.90588e-126						Usp34	0.784997	2.25623e-91
Arhgef5	0.41988	0		Cacna2d3	0.691974	2.67367e-35		Itgb1	0.6799	2.75141e-21		Homer2	0.675692	0						Zcchc7	0.945468	7.51017e-136		Agpat5	1.67416	1.93151e-236		Uchl3	0.385633	3.55945e-10		Ank	0.688968	1.82005e-125						Rsf1	0.849182	3.82728e-91
Panx1	0.413977	0		Tnc	1.41462	3.51667e-35		Tubb2a	0.484768	3.07336e-21		Aldh3b2	0.673731	0						Trim33	0.915028	1.10711e-135		Lmo7	1.13187	2.72678e-236		Dusp22	0.454084	6.09855e-10		Slc5a9	0.263724	5.9012e-125						Ptprf	0.688017	6.78074e-91
Gpsm2	0.412964	0		Ctdspl	1.29716	9.41705e-35		Actb	0.521941	3.2514e-21		Serpinb12	0.669185	0						Gm2164	0.603999	1.36757e-135		Skint9	1.17821	3.74813e-236		Pmvk	0.363234	1.06967e-09		Ptpn13	0.945222	2.41221e-124						Skint4	0.69618	7.14273e-91
Trim7	0.41058	0		Gja1	1.46317	1.08966e-34		Csf1	0.468641	3.83395e-21		Fgfbp1	0.667409	0						Macf1	0.966144	1.88654e-135		Chit1	1.543	2.67561e-235		Klf4	0.452459	1.72028e-09		Lipg	0.352383	4.64033e-124						Gpatch8	0.835292	1.45893e-90
Stard10	0.40903	0		Tspan3	1.33692	1.20049e-34		Btbd11	0.512893	4.06048e-21		Smagp	0.665614	0						Rictor	0.862341	4.42193e-135		Pak3	1.19802	5.51703e-235		Hsdl2	0.345173	2.37689e-09		Slc25a13	0.54794	4.90518e-124						Sgk3	0.875269	2.21726e-90
Cpox	0.407884	0		Slc16a3	1.11393	1.32043e-34		Mmp3	0.288929	5.58021e-21		Dsc1	0.661218	0						Cldn1	0.782749	6.2895e-135		Acsbg1	0.755431	1.35831e-234		Rpl27	0.300508	2.82695e-09		Cachd1	1.07323	7.35519e-123						Cecr2	0.921565	5.80823e-90
Glt1d1	0.406732	0		Fbxw4	0.45875	1.99216e-34		F3	0.550723	5.67385e-21		Zfp750	0.66109	0						Arih1	0.912248	1.38379e-134		Usp2	0.546354	1.83098e-234		Klf5	0.34919	4.70383e-09		Blnk	0.621143	1.40072e-122						Tnrc6c	0.958189	7.49992e-90
Irx5	0.403779	0		Bcl11b	1.17064	3.06977e-34		Prickle1	0.410229	7.58154e-21		Ankrd22	0.657957	0						Cnot4	0.905619	4.24279e-134		Adgrf4	0.977051	4.28137e-234		Rps13	0.256148	6.50135e-09		Dhcr24	0.673271	5.88707e-122						Parp8	1.04155	8.56056e-90
Celf4	0.400952	0		Has2	0.655982	4.08901e-34		Il15ra	0.542775	8.20608e-21		Rab27b	0.651732	0						Nectin1	0.758666	6.07687e-134		Osbpl1a	0.87015	5.50538e-233		Bicd2	0.479866	1.07215e-08		4833423E24Rik	0.521617	6.16421e-122						Phtf2	1.00705	8.74915e-90
C1qbp	0.398423	0		Qsox1	0.874401	4.57673e-34		Spon1	0.356606	9.26626e-21		Il17rc	0.648831	0						Mtmr1	0.748635	6.1414e-134		Acpp	1.53472	2.19384e-232		Rps6	0.28133	1.50994e-08		Fry	1.01039	9.39477e-122						Med13l	0.816117	1.16828e-89
Fzd6	0.396504	0		Zfp507	0.311391	6.73554e-34		Pdia3	0.614033	1.08877e-20		Sptbn2	0.645903	0						Mon2	0.864565	1.78602e-133		Cmtm8	0.385614	3.79311e-232		Phlda3	0.341717	1.8375e-08		Fdft1	0.764136	1.79903e-121						Cachd1	1.096	1.71456e-89
C77080	0.39483	0		Dzip1l	0.321587	8.41438e-34		Gas1	0.601979	1.65189e-20		Adgrf4	0.643079	0						Rasa1	0.906739	1.9996e-133		Efna3	0.542939	1.33934e-230		Clip4	0.361723	2.63284e-08		Ceacam19	0.306175	4.39587e-121						Rev3l	0.87063	2.7873e-89
Ackr4	0.394687	0		Trip13	0.311234	1.70122e-33		Flnb	0.565321	3.74488e-20		Rapgefl1	0.639538	0						Gm37240	0.72309	2.27789e-133		Lce1m	3.46297	2.54917e-230		Elovl1	0.446596	3.05664e-08		Pkp1	0.810744	4.4729e-120						Iffo2	0.966008	1.45632e-88
Chdh	0.390668	0		Prxl2a	0.572359	1.95008e-33		Pde1a	0.412995	3.76199e-20		Mpzl3	0.635999	0						Clasp2	1.11483	3.02206e-133		Plxdc2	1.79518	4.34537e-229		Ptprf	0.408306	3.14527e-08		Nlrc5	0.875948	8.6331e-120						mt-Co2	0.550517	1.68986e-88
Galnt3	0.385988	0		Nt5dc2	0.875985	2.76363e-33		Pxdn	0.49917	1.60433e-19		Slc5a1	0.635469	0						Nrip1	1.02572	3.96526e-133		Srpk1	1.65546	2.41834e-227		Hmgn1	0.517938	3.47911e-08		Acer1	0.458942	2.06372e-119						Fgd6	0.865169	2.19033e-88
Adcy3	0.384286	0		Dsc2	0.402485	3.40554e-33		Dsp	0.514871	1.89648e-19		Lancl1	0.630774	0						Arhgef4	0.673357	8.7297e-133		Ndufa4	1.6144	8.3328e-225		Spint2	0.293876	3.61128e-08		Ptgr1	0.480757	8.46968e-119						Kmt2a	0.856849	2.49409e-88
Tnfrsf18	0.382148	0		Flna	1.31734	4.06808e-33		Col16a1	0.482898	1.96273e-19		Nectin4	0.630198	0						Spag9	0.791892	1.20476e-132		Desi1	1.17644	8.36211e-225		Gm19951	0.650985	4.13686e-08		Myo18a	0.720549	2.02398e-118						Tle4	1.00189	2.88503e-88
Fermt1	0.380334	0		Gtf2e2	0.728679	5.12947e-33		AI506816	0.607362	2.08474e-19		Clic3	0.629943	0						Grhl1	0.805787	1.22246e-132		Gan	1.59769	1.55221e-223		Dusp7	0.401633	4.39865e-08		Ahnak2	0.831688	3.62614e-118						Ssbp2	0.919648	5.38829e-88
Sinhcaf	0.376495	0		Flnb	1.44692	6.08124e-33		Pkp1	0.616696	4.40319e-19		Lipm	0.625093	0						Rtn4	0.874668	1.60605e-132		Thop1	0.590929	3.7972e-223		Ndufa4	0.52029	1.11769e-07		Exph5	0.439059	5.04471e-118						Nfatc1	0.984051	2.96905e-87
Guca2a	0.374009	0		Adarb1	1.04027	1.02893e-32		Calr	0.574608	5.70462e-19		Dlg2	0.624467	0						Trim7	0.604881	2.16915e-132		Sptlc3	1.50145	4.55986e-223		Sptssa	0.521172	1.33103e-07		Gltp	1.03827	1.19562e-117						Setbp1	1.2612	3.07451e-87
Rnf43	0.373833	0		Serinc2	0.861896	2.12991e-32		Rrbp1	0.592449	5.84188e-19		Casp14	0.623999	0						Cblb	1.23487	4.78709e-132		Eppk1	1.49763	7.94902e-220		Ywhaz	0.414672	1.33463e-07		Slk	1.10528	1.21902e-117						Fam135a	0.940376	3.8986e-87
Card10	0.373365	0		Chek2	0.25865	2.2064e-32		Macf1	0.510664	6.21683e-19		Dnase1l3	0.616163	0						Pan3	0.855928	4.97113e-132		Krt10	2.43094	1.89016e-218		Rpl22	0.307172	1.56951e-07		Tfap2a	0.556687	4.30397e-117						Ubap2	0.854269	6.76572e-87
Irx2	0.370185	0		Ccny	1.09139	2.89948e-32		Ddah1	0.480566	6.98341e-19		Celsr2	0.614794	0						Acpp	0.68332	2.97286e-131		Nebl	1.05321	4.34362e-216		Adgrg1	0.277284	1.64548e-07		Rnf217	0.903156	6.02228e-117						Celsr2	0.507126	1.80396e-86
Fam81a	0.369848	0		Tmem158	0.311191	4.3933e-32		Parva	0.546322	7.01453e-19		Msmo1	0.61421	0						Taf15	1.0039	1.05548e-130		Proser2	0.414836	9.9789e-216		Clu	0.358729	2.79355e-07		Pou2f3	0.761943	2.00651e-116						Trio	0.8132	3.90728e-86
Ptk7	0.366827	0		Nphp3	0.258278	7.30284e-32		Ror2	0.355561	8.14772e-19		Slc39a8	0.606363	0						Arntl	0.820864	2.13876e-130		Id4	0.55023	4.08846e-215		Rpl36a	0.343445	2.9705e-07		Jup	0.754415	2.53852e-116						Farp1	0.931032	5.39299e-86
Hoxa7	0.362951	0		Ppfibp1	0.989843	9.09792e-32		Sfn	0.560127	8.56534e-19		Ikzf2	0.602846	0						Pik3cb	0.930156	3.97084e-130		Defb1	0.921925	4.66944e-213		Il17rc	0.344155	3.71726e-07		Sult2b1	0.531569	2.82529e-116						mt-Nd1	0.617291	8.77435e-86
F2rl1	0.362271	0		Bcam	0.504744	9.24764e-32		Bsg	0.573483	1.52059e-18		Hal	0.596775	0						Ptprg	0.798796	9.72128e-130		Trim2	1.34199	1.9833e-212		Rpl7a	0.335843	4.98578e-07		Pard6g	0.675814	3.14114e-116						Bach2	1.00921	1.07222e-85
Piga	0.361658	0		Impa2	0.319792	1.29908e-31		Fkbp11	0.384855	1.846e-18		Cttnbp2	0.591516	0						Actr3	0.736264	3.1381e-129		Gltp	1.56884	5.51456e-212		Dpp3	0.316206	5.63099e-07		Bcl11b	0.783289	3.6837e-116						Arid1b	0.798224	2.45553e-85
Cwh43	0.357648	0		Pacs1	0.961944	1.38005e-31		Txndc5	0.570062	2.27467e-18		Ace2	0.588016	0						Mbd2	0.862479	6.71133e-129		Paqr8	0.565873	2.88934e-211		Emp2	0.536726	1.30488e-06		Aldh3b2	0.384404	9.56644e-116						Ank3	0.820639	3.17364e-85
Shmt1	0.357575	0		Tead4	0.421566	2.03485e-31		Slc39a14	0.360097	2.2921e-18		Fam57a	0.58755	0						Il1rl2	0.878954	1.04952e-128		Mapk13	1.05515	1.41522e-209		Tspan3	0.489411	1.36559e-06		Sh3bgrl2	0.518854	1.35968e-115						Sfrp1	1.0364	3.38412e-85
Frem2	0.349854	0		Kif13a	1.07097	2.36613e-31		Emilin1	0.464938	2.84508e-18		Lsr	0.586485	0						Lemd3	0.943562	1.14607e-128		Slc5a9	0.278136	1.52039e-209		Palld	0.270473	1.43171e-06		Tmprss4	0.649179	1.43835e-114						Tfap2a	0.700152	8.71935e-85
Mthfd1	0.343869	0		Nacc2	0.291257	3.08303e-31		Ablim1	0.43631	3.51722e-18		Cds1	0.582382	0						Sppl3	0.904205	2.48801e-128		Pnpla3	0.262662	2.61505e-208		F11r	0.360556	1.88827e-06		Dsg1a	0.765437	4.87937e-113						Sos2	0.823454	1.15256e-84
Psat1	0.340145	0		Rps6ka1	0.390268	3.14383e-31		Tubb2b	0.436068	3.5176e-18		Pkib	0.580232	0						Cpsf6	0.835475	2.92004e-128		Kifc3	0.873923	1.53769e-206		Pls3	0.339767	4.02714e-06		Slc25a25	0.806966	6.15926e-113						Iqcb1	0.708713	1.27336e-84
Pak6	0.334781	0		Ctnnal1	0.55026	3.47073e-31		Esr1	0.343264	7.20812e-18		Lratd1	0.571569	0						Rps6ka3	1.07366	1.18845e-127		Ggct	1.61891	1.76653e-206		Cyp51	0.500089	6.38429e-06		Afap1l2	0.49388	1.51735e-112						Mbnl1	0.869488	2.0225e-84
Lmo1	0.330445	0		Csta1	1.432	5.29775e-31		Hdlbp	0.618265	9.82426e-18		Sqle	0.568159	0						Frmd4b	0.881418	1.4218e-127		Ace2	0.574336	2.86592e-206		Bod1	0.282044	7.58569e-06		Inava	0.389185	3.6868e-112						Tnks2	0.861321	5.77127e-84
Ccdc88c	0.327711	0		Rbl1	0.330159	5.42756e-31		Fer	0.655073	9.93756e-18		Mpzl2	0.567627	0						Rc3h1	0.844388	2.02757e-127		Dab1	0.691676	1.23532e-205		Pgam1	0.480295	1.05065e-05		Arhgef5	0.504483	6.17589e-112						Nebl	1.11397	1.92246e-83
Snhg4	0.32731	0		Endod1	0.61031	6.08052e-31		Pdia5	0.45574	1.06112e-17		Acpp	0.56758	0						Pola1	0.976156	4.33633e-127		BC016579	0.550424	1.45422e-205		Myl6	0.301253	1.23552e-05		Csnk2a2	0.822768	3.53313e-111						Hdgfl3	0.737011	4.28199e-83
Ajuba	0.325934	0		Schip1	1.0733	6.54536e-31		Col7a1	0.496146	1.17639e-17		Ovol1	0.563181	0						Fnbp1l	0.928567	1.92258e-126		Csnk2a2	1.34942	1.59602e-205		Anxa2	0.309979	1.71101e-05		Adgrg1	0.43764	7.54299e-111						Plcg2	0.70592	7.4706e-83
P2ry1	0.324294	0		E2f8	0.310816	6.65089e-31		Itga6	0.869484	1.40745e-17		Hsdl2	0.563139	0						Rbms1	0.844137	3.72644e-126		Myh14	0.660066	1.03052e-204		Rps25	0.251144	1.84476e-05		Peli1	1.01828	1.58341e-110						Alcam	0.81693	9.60677e-83
Bcl2l15	0.315211	0		Serpine1	1.23653	8.10927e-31		Clmp	0.270853	1.54232e-17		Wdr47	0.562562	0						Gm35188	0.503092	4.07671e-126		Stard4	0.777154	5.00212e-203		Slc2a1	0.559281	1.94774e-05		Mpzl3	0.656887	6.8874e-110						Scmh1	0.960263	1.15034e-82
Sfrp1	0.314928	0		Qsox2	0.311999	1.00838e-30		Urah	0.45117	1.88324e-17		Fam83g	0.560909	0						Zfyve9	0.890401	4.74983e-126		Ankrd35	0.766884	3.47873e-202		Pard6g	0.2873	2.68678e-05		Rarres1	0.477069	2.26664e-109						Kmt2c	0.825229	1.5045e-82
Trp53i11	0.31344	0		Macf1	1.28129	1.43092e-30		Hspa5	0.503059	2.17523e-17		Tdh	0.560246	0						1600010M07Rik	0.747899	8.81019e-126		Slc22a23	0.947395	1.57183e-199		Stom	0.398779	4.74296e-05		Gsn	0.95838	5.44822e-109						Naaladl2	1.52771	1.5238e-82
Dkc1	0.313138	0		Mcm2	0.361431	1.43649e-30		Rbp4	0.306531	4.28962e-17		Mfsd6	0.560155	0						Gm49890	1.0727	2.74447e-125		Sdr42e1	0.384402	1.73568e-198		Pou3f1	0.317183	0.000101279		Garem1	0.786494	1.22684e-108						Ranbp9	1.0306	2.03223e-82
Capns2	0.311953	0		Itpr3	1.11913	1.45756e-30		Jup	0.438534	4.48513e-17		Pgrmc2	0.559518	0						Wdr20	0.723497	2.81312e-125		Prdm1	1.0702	2.37763e-198		Scd2	0.442214	0.000104869		Tjp2	1.00304	9.58995e-108						Nr6a1	1.02117	5.01668e-82
Trim16	0.3101	0		Akr1b8	0.714568	1.56685e-30		Srpx2	0.32299	4.80003e-17		Mid2	0.559511	0						Mark2	0.862415	3.64131e-125		Ehf	1.2598	8.75273e-198		Rpl36al	0.411935	0.000116901		Cobll1	0.686349	1.08644e-107						Tmem131l	0.814286	1.27618e-81
Orc6	0.308316	0		Tbc1d2	0.524911	2.05045e-30		Ikbip	0.402154	5.03362e-17		Tesc	0.558469	0						Afdn	0.785727	4.08079e-125		Tacstd2	1.44505	1.83239e-196		Celsr2	0.253623	0.000119482		2310046K23Rik	1.76708	1.79571e-107						Ptk7	0.626685	1.54446e-81
Has3	0.308136	0		Pfkl	0.714	2.76704e-30		Spsb1	0.4429	5.59006e-17		Idi1	0.555043	0						Nup153	0.844945	8.29642e-125		Llgl2	0.454132	1.84952e-196		Agpat3	0.353431	0.000122713		Insig2	0.655124	2.45505e-107						Mical2	0.891498	1.71596e-81
Pfkfb2	0.306948	0		Trerf1	1.00304	3.0662e-30		Cd63	0.535814	6.72864e-17		H60c	0.551264	0						Mbp	0.640395	1.52683e-124		Pinlyp	0.313492	1.77339e-195		Mapk13	0.281235	0.000144424		Cdc42bpg	0.340774	5.70822e-107						Map3k1	0.80265	2.78859e-81
Edaradd	0.303766	0		Gm26612	0.250806	3.07469e-30		Gpm6b	0.380345	6.93103e-17		Rab3d	0.549677	0						Cdk19	0.939269	1.59488e-124		Rgs20	1.02328	5.27134e-195		Fdft1	0.358744	0.000265947		Arhgef37	0.474155	6.23944e-107						Ptprs	0.686528	4.36037e-81
Il12rb2	0.302097	0		Kif15	0.561378	3.23204e-30		Fkbp9	0.556935	7.62978e-17		Skint1	0.549316	0						Cramp1l	0.897347	2.23041e-124		Casz1	1.35446	4.83912e-194		Limk2	0.287023	0.00030062		Sdc1	0.794107	1.1178e-106						Strn3	0.783968	1.20723e-80
Ppp2r2c	0.301353	0		Slc10a7	0.883989	4.48154e-30		Prickle2	0.360325	9.13073e-17		Cyp2b10	0.546808	0						Med13l	0.807534	2.284e-124		Krt77	3.01401	6.53793e-194		Txndc17	0.501126	0.000346301		Ptprf	0.630648	1.3576e-106						Gatad2b	0.72144	1.91807e-80
Wnt7b	0.30044	0		Homer3	0.570368	4.53957e-30		Ank3	0.416341	1.05176e-16		Hadh	0.546416	0						Wee1	0.847711	3.54478e-124		Ybx3	1.29743	2.5361e-193		Prdx5	0.289534	0.000460518		Itpr3	0.621379	1.99061e-106						Ankrd17	0.865429	1.8558e-79
Dll1	0.295157	0		Nectin1	1.00993	4.72266e-30		B830012L14Rik	0.316469	1.4609e-16		Uchl3	0.544796	0						Chit1	1.00408	7.95727e-124		Serpinb8	1.02204	7.14325e-193		Gpx1	0.401582	0.000559418		Bmpr1a	0.800331	2.65566e-106						Myo10	0.757822	2.60271e-79
Slc2a12	0.29505	0		Smtn	0.406516	5.06123e-30		Prelid2	0.420499	1.70472e-16		Wwc1	0.544081	0						Xrn2	0.892303	1.39935e-123		Ank	0.932973	6.16929e-191		AI506816	0.402469	0.000630036		Osbpl3	0.916744	4.02336e-106						Ube2g1	0.843756	5.58341e-79
Gm13219	0.294321	0		Rttn	0.407525	5.96695e-30		Higd1a	0.497785	2.33543e-16		1110008P14Rik	0.542787	0						Rapgefl1	0.580667	1.67507e-123		Rhbg	0.266724	1.27661e-190		Dbi	0.429991	0.000704416		Macf1	1.06313	6.93162e-106						Baiap2l1	0.836737	2.62422e-78
Pitpnm3	0.292073	0		Sdc1	1.18724	9.63175e-30		Chsy3	0.286993	3.04028e-16		Tfap2a	0.53365	0						Thoc2	0.872286	3.89026e-123		Msmo1	1.06952	2.68813e-190		Epha2	0.354691	0.00174128		Ppp1r13l	0.404208	1.70888e-105						Aff1	0.926677	3.39035e-78
Hotairm1	0.290593	0		Sh3rf1	0.959791	1.02467e-29		Pde10a	0.334565	3.89182e-16		Gm9750	0.533592	0						Srsf11	0.768785	1.29672e-122		Acer1	0.678448	2.40022e-189		1110008P14Rik	0.366048	0.00238074		Cask	1.17208	2.59782e-105						Filip1l	0.748311	3.56809e-78
Tmem158	0.289505	0		Dtnb	0.557191	1.09248e-29		Dok6	0.282352	4.6919e-16		Mgst2	0.532126	0						Sh3rf2	0.670479	2.29517e-122		Mall	0.684718	2.21498e-188		Eef1d	0.457446	0.00245712		Ldhb	0.310452	3.93991e-105						Bcl11b	0.829944	3.67908e-78
Fam189a2	0.286237	0		Plet1	0.749947	1.26885e-29		Tpm1	0.445669	5.14854e-16		Il20rb	0.527715	0						Peli2	1.28764	2.44085e-122		Hspb8	0.833797	7.66067e-188		Acsl1	0.352962	0.00414994		Nfatc1	0.623201	5.10813e-105						Bmp7	0.417085	5.04396e-78
Slc4a8	0.285579	0		2700097O09Rik	0.491022	1.31997e-29		Fgf7	0.302798	5.79093e-16		Rbp2	0.525205	0						Gm48678	0.790614	3.16627e-122		Gm20219	0.427109	1.53023e-187		Rpl29	0.271915	0.00629661		Ppp1r14c	0.690574	1.0636e-104						Senp6	0.733771	6.44461e-78
Snai2	0.28269	0		Myof	1.20019	1.67259e-29		Cpe	0.430498	6.16189e-16		Cebpa	0.522991	0						Nsd3	0.754081	3.41484e-122		St14	0.836403	4.6722e-187		Chchd2	0.324762	0.00662214		Nipal2	0.601863	2.76411e-104						Nrbp2	0.480684	1.18231e-77
Tfap2b	0.282572	0		Pdk1	0.676029	1.96006e-29		Egfr	0.371013	9.03304e-16		Clu	0.522571	0						Myo18a	0.699851	3.41632e-122		Exph5	0.817449	1.93672e-186		Rab3d	0.255161	0.00688472		Ano1	0.451091	4.14318e-104						Arap2	0.740132	2.45621e-77
Cib2	0.277881	0		Amotl1	0.9495	3.24019e-29		Ctsk	0.411897	1.14801e-15		Orm1	0.518744	0						Wdr47	0.758038	4.0288e-122		Rab27b	0.880806	1.9307e-185		Rps17	0.264916	0.00947976		Sptlc3	0.500684	5.6633e-104						Srrm2	0.646583	3.25543e-77
Aknad1	0.270362	0		Cbr2	0.64498	3.79666e-29		Plod1	0.462377	1.24634e-15		Tmem154	0.517181	0						Zfp326	0.924973	4.15111e-122		Evpl	1.08684	3.86521e-185		Prnp	0.438899	0.0159725		Kctd1	0.476219	1.33861e-103						Slco2a1	0.839946	6.52445e-77
Fam83f	0.267495	0		Vgll4	1.15659	3.96665e-29		Dapk2	0.283797	1.25092e-15		Sytl1	0.516924	0						Usp47	0.964524	4.5506e-122		Csnk2b	1.11773	3.96627e-185		Bok	0.295489	0.0345515		Nhsl1	0.868568	2.73059e-103						Plet1	0.645264	9.49259e-77
Plxnb1	0.267428	0		Inava	0.42061	4.07996e-29		Ephb2	0.357931	1.59364e-15		Psapl1	0.516281	0						Zc3h7a	0.80934	4.8347e-122		Arhgef5	0.904396	1.25902e-184		Rab10	0.338136	0.0475145		Tacc2	0.783204	3.85097e-103						Acvr2a	0.821971	9.60751e-77
Plch2	0.267171	0		Maf	1.46031	5.69186e-29		Cdc42bpa	0.557079	2.06416e-15		Bok	0.514901	0						Atp13a3	0.886258	6.63258e-122		Bbox1	0.650158	1.56953e-183		Ybx3	0.280768	0.0481981		Capns2	0.420339	4.01903e-103						Bcam	0.470925	9.86838e-77
Hlf	0.261391	0		Kntc1	0.256752	6.62953e-29		Sec61b	0.46177	2.07006e-15		Ephb6	0.5135	0						Cstf3	0.69602	8.71844e-122		Grhl1	1.03747	2.52523e-182						Wdr47	0.524362	1.20474e-102						Brwd1	0.76848	1.36999e-76
Gdpd2	0.260296	0		Sec14l2	0.440902	6.78464e-29		Rbfox2	0.455945	2.07343e-15		Pard6g	0.512869	0						Golga4	0.826817	1.60855e-121		Fam57a	0.802073	1.26011e-181						Vangl2	0.354418	2.43065e-102						Vps13a	0.76732	3.15223e-76
Eogt	0.251361	0		Mad1l1	0.869885	6.95748e-29		Gpx7	0.378851	2.08187e-15		Erbb3	0.512008	0						Wdr43	0.833349	2.7349e-121		Skint4	0.586355	1.41907e-181						Klhl8	0.274283	4.39116e-102						Lama5	0.376518	2.02372e-75
Rp9	0.523093	4.9835e-303		Pde7a	0.916928	7.03265e-29		Adam19	0.368848	2.11064e-15		Prom2	0.511762	0						Erbb3	0.590192	4.95552e-121		Tuba4a	1.24583	9.00123e-181						Sdc4	1.00058	1.56735e-101						Nup153	0.765054	5.16698e-75
Rpl7	0.740604	6.82346e-303		Mastl	0.360604	7.85385e-29		Tgfbr3	0.343159	2.20717e-15		Plekha6	0.504769	0						Ptprf	0.614008	9.37422e-121		Elovl6	0.659123	6.2957e-180						Bok	0.506787	4.80903e-101						Zfp704	0.742699	6.44349e-75
Nolc1	0.389991	6.99743e-303		Cmtm4	0.437522	8.51782e-29		Egln3	0.425152	2.34374e-15		Sdr16c6	0.498187	0						5330438D12Rik	0.622534	9.49162e-120		Sdr16c5	0.777449	2.4716e-178						Pycard	0.719996	4.96408e-101						Chdh	0.3787	7.33357e-75
Rpl36a	0.834762	1.96878e-302		Cdca8	0.455427	8.77386e-29		Myo1b	0.413334	2.38389e-15		Nsun2	0.497163	0						mt-Nd5	0.733543	1.08564e-119		Rhof	0.39808	6.88881e-178						Inhbb	0.280036	5.72986e-101						Frmd6	0.761483	1.16039e-74
Spint2	0.510653	5.77522e-302		Tpx2	0.586924	1.03056e-28		Tuba1a	0.518157	2.39202e-15		Hebp2	0.49687	0						Ubap2	0.780836	1.19472e-119		Ocln	0.765743	1.01711e-177						Ide	0.617405	7.95253e-101						Cbfa2t2	0.696031	2.21902e-74
Rpl23	0.736406	7.49355e-302		Cdc25b	0.451294	1.75459e-28		Calu	0.586586	2.63971e-15		Pou2f3	0.496075	0						Serpinb2	1.17759	1.48551e-119		Ugcg	1.22496	4.07058e-177						S100a16	0.745605	1.34585e-100						Cnot6l	0.798137	6.79953e-74
Wdr61	0.559995	2.87552e-301		Orai2	0.412946	1.94378e-28		Nucks1	0.574611	2.72185e-15		Macc1	0.493165	0						Ppp2r5e	0.819453	2.4859e-119		Cdkn2b	0.318531	6.21763e-175						Sbsn	1.1503	1.49475e-100						Znrf3	0.893181	9.09498e-74
Agrn	0.332828	4.41163e-301		Mbnl3	0.410537	2.55224e-28		Pcdh7	0.395961	2.88134e-15		Stard10	0.492783	0						Cdh4	0.714663	3.02977e-119		Klf4	1.23583	1.07769e-174						Crip2	0.673511	1.8354e-100						Arl15	0.872642	1.21079e-73
Sema4b	0.471118	1.66651e-300		Prag1	0.337937	2.95991e-28		Sdc1	0.60484	2.95754e-15		Mb21d2	0.48969	0						Clip4	0.930027	3.94452e-119		Lsr	0.773984	1.3595e-174						Txnrd3	0.325992	2.67072e-100						Pan3	0.76944	1.90207e-73
Rps13	0.757541	1.31595e-299		Rad51b	1.0375	4.89668e-28		Lypd3	0.345521	3.06935e-15		Ly6g6e	0.486727	0						Stam	0.803811	6.32976e-119		Miga2	0.283625	2.27387e-173						Btbd11	0.711286	4.26528e-100						Pard6g	0.651994	2.07405e-73
Rras2	0.626635	7.52913e-299		Mb21d2	0.935604	5.26834e-28		Ugdh	0.304907	3.21711e-15		Paqr5	0.486523	0						Larp4b	0.751397	6.87462e-119		Dsg1a	1.59406	5.29184e-173						Fam210b	0.33143	5.96659e-100						Epb41l5	0.708998	2.3406e-73
Rif1	0.513997	2.65848e-298		Serpinb1a	0.722162	6.29746e-28		Dsc3	0.379049	3.50163e-15		Tns4	0.485393	0						Ncoa2	0.874479	1.24355e-118		Sc5d	0.834286	5.6486e-173						Tnk1	0.396417	1.91196e-99						Ocln	0.695943	5.74614e-73
Tmem245	0.547451	3.40263e-298		Mark3	1.2768	7.76415e-28		Rbp2	0.37499	3.54628e-15		Mapk13	0.482604	0						Rcor1	0.875759	2.87118e-118		Hip1r	0.674679	2.01995e-171						1110008P14Rik	0.582012	2.91661e-99						Bmpr2	0.853736	6.11077e-73
Tiam1	0.846767	4.41384e-298		Gpr87	0.339761	9.60204e-28		Serpinb2	0.281263	3.8551e-15		Gjb3	0.476638	0						Mbtd1	0.978535	7.10629e-118		Pmvk	0.749916	6.86908e-171						Itprid2	0.864649	7.20935e-99						Col7a1	0.452135	6.94193e-73
Gtf2f2	0.807831	6.47251e-298		Mical2	0.819427	1.20645e-27		Dynll1	0.478398	4.03976e-15		AA986860	0.471061	0						Slc38a2	0.882374	5.54624e-117		Gjb5	0.836454	1.10645e-169						Serinc2	0.495173	8.40585e-99						Daam1	0.746669	1.40974e-72
Sun1	0.462721	1.52176e-297		Atp9a	0.733126	1.24775e-27		Gm17268	0.259088	4.06604e-15		Sh3rf2	0.467705	0						Bmpr2	0.842109	1.04865e-116		Usp54	0.389006	7.09523e-169						Tmem19	0.461277	1.15918e-98						Nfat5	0.852493	2.59305e-72
Grpel2	0.376977	1.08808e-296		Mboat1	0.523561	1.2504e-27		Ssr3	0.531638	4.20247e-15		Mettl7a1	0.4584	0						Psme4	0.867663	7.7935e-116		Blnk	0.925534	1.01312e-167						Fnbp1l	0.805398	1.20634e-98						Large1	0.917123	3.14328e-72
Rps17	0.77498	2.90526e-296		Ldlrad4	1.39991	1.38194e-27		Pdia6	0.583951	4.50307e-15		Hspa12a	0.448442	0						Ubxn7	0.8549	8.3755e-116		Tmem79	0.465246	1.59585e-167						Gjb4	0.283896	3.94739e-98						Smoc2	0.574178	4.00989e-72
Nckap5	0.644711	2.92464e-296		Tacc3	0.42773	1.4735e-27		Cavin1	0.385183	4.88152e-15		Ripk4	0.448321	0						Tanc1	0.799753	1.85174e-115		Dlg3	0.371157	3.31328e-167						Kifc3	0.415325	9.44528e-98						Neo1	0.698877	4.51511e-72
Ptpn14	0.501113	3.5593e-296		Slc25a24	0.492368	1.83455e-27		Pdgfrl	0.296139	5.91145e-15		Klk8	0.447797	0						Wapl	0.74952	3.97303e-115		Ndrg2	0.481292	1.64768e-166						Fam167a	0.336712	1.25645e-97						Mill1	0.778086	5.73216e-72
Rpl26	0.772497	4.63096e-296		Rras2	0.801846	2.09604e-27		Bmpr1a	0.522395	6.42756e-15		Skint4	0.447744	0						Gk	1.00447	5.15389e-115		Gpld1	0.423648	4.62416e-166						Ddi2	0.686853	4.24097e-97						Ubxn7	0.69266	6.85882e-72
Rpl3	0.807475	5.65623e-296		Sgo2a	0.335834	2.96196e-27		Col18a1	0.344796	8.71194e-15		Mall	0.4461	0						Acsl1	0.874112	5.34485e-115		Slitrk6	0.300169	4.04527e-165						Tmem159	0.456894	7.86244e-97						Usp9x	0.832768	7.2695e-72
Ap1ar	0.453882	1.64661e-295		Stox2	1.20938	4.87444e-27		Sec24d	0.494148	1.11595e-14		Tmprss11f	0.43976	0						Sema4b	0.660505	1.56638e-114		Macc1	0.752659	1.22189e-164						Pglyrp4	0.402056	1.58895e-96						Fto	0.761596	9.09413e-72
Cnst	0.318501	2.00299e-295		Ero1l	1.12394	5.35226e-27		Prc1	0.475044	1.22357e-14		Arpc5l	0.435933	0						Ric1	0.857741	1.58788e-114		Gdpd2	0.448237	1.62532e-164						Hadh	0.526558	1.6731e-96						Mcc	0.826062	1.17099e-71
Trabd2b	0.470166	5.4168e-295		Ephb4	0.384661	8.82185e-27		Tln2	0.383256	1.53395e-14		Cyp4f39	0.43521	0						Usp34	0.743763	1.73911e-114		Lypd3	1.44159	2.64365e-164						Nxt1	0.417423	3.90986e-96						Pcdh7	1.27009	1.76005e-71
Epb41l5	0.45149	1.48036e-294		Mrtfa	1.32871	1.52034e-26		Mxra8	0.410988	1.54014e-14		Eef2k	0.434355	0						Mir100hg	1.09956	2.03863e-114		Vstm5	0.433614	3.38894e-164						Ezr	0.6903	6.85268e-96						Prrc2c	0.660018	2.91552e-71
Rpl19	0.752282	6.03506e-294		Fat1	0.900509	1.77049e-26		Tpx2	0.4114	1.75396e-14		Esrp2	0.433469	0						Senp6	0.82437	2.32344e-114		Gm9750	0.336262	7.37077e-164						Rnf43	0.365451	7.49391e-96						Arl13b	0.795802	3.19454e-71
Myo10	0.842572	2.62488e-293		Cald1	1.11978	2.39945e-26		Anxa1	0.509369	1.91043e-14		Lrp4	0.430565	0						Tns4	0.606675	3.17244e-114		Ccdc120	0.279931	1.72124e-163						Ctnna1	0.80953	7.5881e-96						Slmap	0.797307	3.29811e-71
Wdr43	0.602305	5.30912e-293		Camsap2	1.1812	2.43226e-26		Cmss1	0.298219	2.13064e-14		Sc5d	0.429033	0						Sptlc2	0.938228	4.31572e-114		Trim29	1.16378	2.36714e-163						Rab38	0.550996	1.13864e-95						Adcy9	0.744748	4.81907e-71
Hagh	0.391166	1.04703e-292		Gm26532	0.539495	2.65868e-26		Rps12	0.416396	2.42813e-14		Ano1	0.426477	0						Garem1	0.763572	4.32573e-114		Sphk1	0.623856	2.70807e-163						Pard6b	0.296323	1.17305e-95						Pik3cb	0.848972	5.40471e-71
Rps23	0.749004	1.75547e-292		Ptk2	0.76581	2.97504e-26		Aplp2	0.819304	3.07136e-14		Skint10	0.423541	0						Reps1	0.771944	1.0259e-113		Lratd1	0.732861	3.28992e-163						Pik3cb	0.760897	1.66283e-95						Col4a5	0.525164	8.49866e-71
Rps2	0.82375	1.26677e-291		Glo1	0.854563	3.79613e-26		Txn1	0.43857	3.33646e-14		Epb41l5	0.423023	0						Ripk4	0.515365	1.81397e-113		Slc19a2	0.394448	1.15908e-162						Slc39a11	0.640167	1.89993e-95						Stag1	0.749499	8.74392e-71
Skint1	0.290617	1.32456e-291		Plec	1.28657	5.83603e-26		Sec61g	0.496944	4.10758e-14		Zfp185	0.419745	0						Dhx15	0.812923	2.36538e-113		Tob1	0.980549	1.44215e-162						Hspb1	0.90579	4.84277e-95						Bnc1	0.375707	8.85708e-71
Slc16a9	0.284988	1.57723e-290		Taok2	0.608433	8.03912e-26		Perp	0.360043	4.66162e-14		Cers3	0.416125	0						Rab22a	0.74234	2.63012e-113		Tubb2a	1.34878	2.80265e-162						Ephx3	0.327844	7.7667e-95						Krt5	0.603673	9.06769e-71
Fam83g	0.318304	4.26103e-290		Mphosph6	0.356321	9.85857e-26		Svep1	0.284096	4.7583e-14		Prrg4	0.415863	0						Pla2g4f	0.672675	3.7496e-113		Klc3	0.755059	2.9437e-162						Tspan5	1.01713	8.00781e-95						Atrx	0.685159	1.20559e-70
Epb41l4aos	0.330348	1.15008e-289		Rad51	0.250563	9.96327e-26		Mt2	0.267182	6.37073e-14		Tfap2c	0.414458	0						Ktn1	0.730241	9.38959e-113		Serpinb12	0.964751	4.25568e-161						Lad1	0.362407	9.5323e-95						Atxn2	0.819981	1.3804e-70
Rps7	0.862424	1.75166e-289		Ptk2b	0.78659	1.01891e-25		Kdelr3	0.398754	6.76093e-14		Eif1ad	0.408636	0						Riok1	0.709753	6.65937e-112		Abhd6	0.659817	4.30419e-161						Lmbrd2	0.656924	9.87927e-95						Fhit	1.19925	1.44482e-70
Rpl14	0.790734	5.05651e-289		Tfap2a	0.640424	1.02372e-25		C1s1	0.317445	7.6122e-14		Hs3st6	0.407837	0						Ankrd22	0.757765	7.17718e-112		Fam135a	1.49341	4.77918e-161						Plch2	0.315198	1.6706e-94						Tanc1	0.731421	3.28902e-70
Aggf1	0.501202	9.14926e-289		Wnt4	0.729062	1.17189e-25		Dkk3	0.343755	8.32273e-14		Ocln	0.407725	0						Ybx3	0.674271	1.0826e-111		Rhod	0.517362	2.2157e-160						Tnfrsf19	0.440186	2.46068e-94						Zfyve9	0.698108	4.00778e-70
Ppp1r14b	0.658492	1.46848e-288		Slitrk6	0.275659	1.36255e-25		Trp63	0.457886	8.85527e-14		Mfsd2a	0.402365	0						Cpne8	0.909451	1.16665e-111		Ano8	0.320247	1.2838e-159						Nfe2l1	0.703689	3.31952e-94						Eps8l2	0.596022	4.23787e-70
Btbd3	0.401672	2.4656e-287		Lamb1	0.434346	1.98269e-25		Pgam1	0.45939	1.05503e-13		Myh14	0.402119	0						Ccdc6	0.776617	1.22389e-111		Plekhn1	0.690449	4.9831e-159						Lnpk	0.550882	3.93887e-94						Camta1	0.767418	6.55203e-70
Lgals7	0.723582	3.85249e-287		Ahcyl2	1.22397	2.09595e-25		Stk39	0.396072	1.11203e-13		Mreg	0.40195	0						Arhgap12	0.812694	1.6015e-111		Cyp51	1.04981	6.27548e-158						Ly6g6e	0.284003	5.0181e-94						Pcnx	0.759007	7.71326e-70
Rpl5	0.768821	6.34507e-287		Sema4b	0.645259	2.10025e-25		Mir100hg	0.31066	1.91206e-13		Gjb4	0.401414	0						Btbd7	0.733604	1.62234e-111		Elovl7	1.01481	4.90016e-157						Tuft1	0.531929	5.28209e-94						Arid4b	0.835103	1.98631e-69
Rps10	0.748896	1.04475e-286		Smo	0.602108	2.53257e-25		Schip1	0.480594	1.95362e-13		Gpr160	0.400224	0						Cul3	0.779736	1.7112e-111		Camsap3	0.351562	7.39909e-157						Map1lc3a	0.660626	5.52275e-94						Ptbp2	0.770974	2.0369e-69
Rps3	0.802068	1.52894e-286		Kif4	0.445813	2.66201e-25		Csrp2	0.447057	2.4076e-13		Erbb2	0.396063	0						Jup	0.642456	1.75327e-111		Gramd3	1.03253	2.20625e-156						Tjp1	0.704614	7.27245e-94						Clstn1	0.671481	2.12103e-69
Polr3g	0.290812	3.4183e-286		Tspan9	0.985965	2.76e-25		Nxn	0.359367	2.5446e-13		Lad1	0.394001	0						Arhgef12	0.712988	1.87883e-111		Map1lc3a	1.18461	2.82029e-155						Map2k4	0.864764	1.67266e-92						Ryk	0.654457	3.61512e-69
Stim1	0.838203	1.57944e-285		Cyb5b	0.615772	2.82093e-25		Nfia	0.366436	2.7013e-13		Cep170b	0.392454	0						Hnrnpc	0.796487	3.53123e-111		Il18	1.22745	3.47285e-155						Iffo2	0.689883	1.93666e-92						Rock2	0.749195	3.88123e-69
Ptcd3	0.301794	3.01646e-285		Areg	0.677273	2.82745e-25		Ggct	0.419158	2.9979e-13		Tmem40	0.387211	0						Ythdc1	0.842698	3.78675e-111		Eps8l2	0.656524	1.75376e-154						Crybg1	0.669763	3.30942e-92						Ece1	0.92198	4.87853e-69
Pex14	0.625412	4.70058e-285		Tmem140	0.5831	3.33464e-25		2610035D17Rik	0.442176	3.11629e-13		Hr	0.386565	0						Mef2a	0.837165	4.33522e-111		Prdx5	1.14284	2.55698e-153						Lypd3	0.652455	4.07352e-92						Scaf8	0.775088	6.86465e-69
Rack1	0.775625	2.38403e-284		Ehbp1	0.660982	3.8697e-25		Flrt2	0.530198	3.25265e-13		Ddr1	0.385921	0						Tnks2	0.797646	7.01345e-111		Sh3gl2	0.421835	4.42353e-151						Pkp3	0.460885	4.65497e-92						Rictor	0.773522	8.94106e-69
Erbb3	0.328235	2.62199e-284		Igsf8	0.732462	4.01527e-25		Oaf	0.403071	3.66105e-13		Mvk	0.384514	0						Ubn2	0.808483	1.08781e-110		Mvd	0.26806	6.06057e-151						Cldn4	0.584841	9.02254e-92						Ctnnd1	0.71465	9.46027e-69
Slc7a6	0.464197	4.83102e-284		Soga1	0.590827	6.01083e-25		Tmem263	0.455795	3.7195e-13		Cyp2j6	0.383614	0						Magi1	0.686415	2.01539e-110		Sptbn2	0.616647	8.78116e-151						Mid2	0.619035	1.00136e-91						Fus	0.710608	1.17125e-68
Taf15	0.752923	8.49899e-284		Pard6g	0.779431	6.70672e-25		Scd2	0.500564	3.7983e-13		Ephx3	0.381541	0						Dsp	0.714762	2.64176e-110		Bnipl	0.275986	9.35309e-150						Pls3	0.765917	1.39101e-91						Pdzd2	0.794467	1.23286e-68
Igfbp3	1.35082	1.60903e-283		Cbx5	0.707918	6.93112e-25		Fat1	0.466882	3.81131e-13		Ppp1r13l	0.377819	0						Ppm1b	0.776175	7.76028e-110		Tmem45a	1.24218	1.57553e-149						Lrig3	0.419162	1.41722e-91						Irx5	0.533898	2.17879e-68
Fat1	0.446023	4.92524e-283		Pkp1	1.07603	7.03402e-25		Itgb4	0.443817	3.90863e-13		Bod1	0.374462	0						Bclaf1	0.864376	7.76052e-110		Pdlim2	0.511227	3.20076e-149						Krt23	0.44776	2.5793e-91						Immp2l	0.969914	6.70256e-68
Idh3a	0.293927	2.43841e-282		Apex2	0.411114	9.22532e-25		Rps26	0.396237	4.33041e-13		Efna3	0.36691	0						Rab10	0.818049	1.06892e-109		Adgrl2	1.39011	3.74959e-149						Ctnnd1	0.747724	2.81163e-91						Itpr3	0.543067	1.15633e-67
Hras	0.48014	9.22441e-282		Cd276	0.312593	9.31982e-25		Qsox1	0.426867	4.64007e-13		Skint7	0.36621	0						Metap1	0.691379	2.02706e-109		Lipe	0.366267	4.58002e-149						Cebpa	0.389826	3.65927e-91						Rai1	0.628749	1.26233e-67
Adrb2	0.342586	1.07966e-281		Zfp827	0.281109	9.44096e-25		Atp2a2	0.496575	4.88608e-13		Trim7	0.36502	0						Mill1	0.939316	3.98005e-109		Snrnp25	0.306536	8.46446e-149						Gstm1	0.539795	6.76763e-91						Dip2b	0.726879	1.33777e-67
Amd1	0.409167	3.41868e-281		Mms22l	0.448095	9.95135e-25		Olfml3	0.321838	5.03998e-13		Tmem79	0.364922	0						Cask	0.84365	1.63751e-108		Fdps	1.19455	3.47845e-148						Mapk13	0.37125	8.04866e-91						Cul1	0.785787	1.83046e-67
Sh3rf1	0.614465	1.06493e-280		Cip2a	0.366563	1.03642e-24		Nckap5	0.322936	6.21548e-13		Epha2	0.364776	0						Ahcyl2	0.903359	2.04343e-108		Pard6b	0.331924	6.48818e-148						Mst1r	0.292869	9.55809e-91						Tent4b	0.755933	2.53695e-67
Nfib	0.64478	4.64119e-280		Jade3	0.349161	1.10489e-24		Rnf19b	0.563167	7.24538e-13		Ormdl2	0.364362	0						Clca3a2	0.967354	2.8022e-108		Perp	1.27539	1.45859e-147						Luzp1	0.760034	1.0713e-90						Srsf7	0.630478	2.92444e-67
Dip2b	0.810214	6.46885e-280		Lrp5	0.561866	1.26692e-24		Lman1	0.509366	8.21594e-13		Slc25a48	0.364232	0						Med13	0.735486	3.79876e-108		N4bp3	0.262655	2.45415e-147						Ripk2	0.745501	1.43203e-90						Usp54	0.459004	5.274e-67
Tmem238	0.261075	1.41322e-279		Dip2b	1.23752	1.5673e-24		Cks1b	0.382402	1.04185e-12		Rhov	0.363635	0						Fbxo11	0.782767	7.61138e-108		Slc10a6	0.56395	4.64805e-147						Crybg2	0.29715	2.28707e-90						Ssbp3	0.68238	5.06166e-66
Ddx46	0.565512	1.43987e-279		Abhd18	0.392558	1.80356e-24		Lamb3	0.795985	1.34182e-12		Cobl	0.361613	0						mt-Nd3	0.627598	9.25783e-108		Trpv3	0.411056	6.04703e-147						Ivl	0.373552	2.33732e-90						Ephb4	0.466273	5.35921e-66
Npm3	0.322053	2.48536e-279		Nars2	0.380515	1.91109e-24		Lars2	0.279918	1.37613e-12		Eps8l2	0.361239	0						Hacd2	0.77061	9.71985e-108		Ablim1	0.999412	6.71265e-146						Foxk1	0.442293	2.65674e-90						Rapgef2	1.16746	8.08241e-66
Mid2	0.518111	5.53133e-279		Adgrg1	0.517332	1.94904e-24		Fkbp7	0.344645	1.49621e-12		Tmem238	0.360739	0						Tfap2c	0.496128	9.78922e-108		Ggh	1.17828	8.11076e-146						D230025D16Rik	0.47379	2.71823e-90						Cpsf6	0.682155	8.95647e-66
Ociad2	0.252083	6.3208e-279		Alg8	0.31201	2.20156e-24		Defb1	0.359344	1.55875e-12		Gm2164	0.356031	0						Sun1	0.653361	3.21201e-107		Dsp	1.3752	1.12283e-145						Selenoi	0.572733	3.39197e-90						Ptpn3	0.647336	9.87984e-66
Rps11	0.763922	1.63389e-278		Kcnq5	0.790001	2.58279e-24		Homer2	0.36306	1.57521e-12		Mal2	0.354149	0						Phactr2	1.15412	4.18917e-107		Emp2	1.1231	2.65863e-145						Scap	0.5541	6.83903e-90						Nop58	0.641361	2.08243e-65
Ust	0.892396	3.44856e-278		Vstm5	0.358068	2.70263e-24		Camk2d	0.4927	1.879e-12		Srd5a1	0.353348	0						Arid1b	0.761504	1.02329e-106		Crybg2	0.40593	3.19679e-145						Cysrt1	0.280229	9.37587e-90						Rasal2	0.659383	1.0452e-64
Prep	0.436569	4.67248e-278		Erp44	0.927787	3.20082e-24		Il1r1	0.277357	2.71837e-12		Serpinb3b	0.353252	0						Col4a3bp	0.800543	1.77254e-106		Csta1	0.952266	1.81414e-144						Clpx	0.585857	1.65659e-89						Erbin	0.701772	2.74633e-64
Mcm7	0.254942	4.85271e-278		Mcm5	0.268261	3.37225e-24		Dip2c	0.48378	3.61699e-12		Il20ra	0.35156	0						Lnpk	0.668671	1.82315e-106		Clu	0.746728	8.74802e-144						Kremen1	0.580278	2.27754e-89						Pxdc1	0.737445	3.42443e-64
Mir205hg	0.366793	4.9184e-278		Dock9	0.812227	3.76346e-24		Ostc	0.527237	3.75012e-12		Scnn1a	0.349707	0						Ppl	0.604538	1.92683e-106		Sort1	0.411433	1.45795e-143						Dkkl1	0.422487	2.82757e-89						Ncor1	0.628532	3.77606e-64
Mill1	0.789741	6.42189e-278		Slc7a1	0.805564	3.87294e-24		Tagln2	0.462413	4.05026e-12		Hlf	0.348482	0						Skint11	1.09192	1.98485e-106		Phldb3	0.390876	1.98836e-143						Lrig1	0.81872	2.99199e-89						Tcf7l1	0.851248	5.12503e-64
Usp10	0.375909	5.91869e-277		Gpc4	0.398714	4.84564e-24		Mlec	0.455531	5.59761e-12		Stard4	0.346529	0						Kdm4c	0.72296	3.08653e-106		Fhdc1	0.382725	3.21175e-143						Slc39a8	0.573653	4.49178e-89						Yes1	0.684492	7.3634e-64
Rgs12	0.395471	1.53214e-276		Diaph3	1.00451	5.13516e-24		Mast2	0.503597	5.92534e-12		Camsap3	0.345161	0						Fbxw11	0.787022	3.21728e-106		Cltb	0.923785	3.46249e-143						Hopx	0.490662	5.29472e-89						Spint2	0.518189	1.08261e-63
Npm1	0.75303	1.58301e-275		Hook1	0.561161	5.3513e-24		Fhl2	0.407609	7.5622e-12		Crb3	0.3432	0						Fat2	0.465823	4.15617e-106		Crabp2	0.578498	1.19669e-142						Hacd3	0.556086	6.09478e-89						Maml3	0.740417	1.15168e-63
Dusp7	0.427862	4.57385e-275		Etl4	0.941852	5.77584e-24		Hsp90aa1	0.39547	9.75382e-12		Cwh43	0.342804	0						Ppp1r12a	0.801202	6.04327e-106		Myzap	0.835255	6.91841e-142						Slmap	0.849539	6.12245e-89						Nckap5	0.807304	1.354e-63
Atic	0.260449	1.24876e-274		Anxa2	1.07631	7.48389e-24		Ldlrad4	0.303222	1.14731e-11		Osbpl5	0.341609	0						Sar1b	0.91049	6.12445e-106		Scel	1.17368	1.70509e-141						Pon2	0.675197	6.18674e-89						Nedd9	0.58115	1.57805e-63
Rbbp8	0.88025	1.47476e-273		Ptk7	0.455961	8.51415e-24		Sqle	0.39977	1.39781e-11		F2rl1	0.33921	0						Unc45a	0.596735	7.07544e-106		Sqle	0.827775	1.13295e-138						Naa25	0.56014	6.53185e-89						Arhgap32	0.704497	2.77483e-63
Rpl7a	0.703635	2.02573e-273		Lig1	0.383065	8.91891e-24		Man2a1	0.413183	1.7138e-11		Emc4	0.337701	0						Zbtb11	0.769366	8.93142e-106		Ptpn21	0.608468	1.4357e-138						Socs5	0.458547	6.91468e-89						Car12	0.786876	3.55939e-63
Bag4	0.318348	3.72093e-273		Ube3c	0.730761	1.1532e-23		C1ra	0.295724	2.5339e-11		Slc6a20a	0.334809	0						Galnt3	0.472876	1.25317e-105		Ap1s3	0.462185	2.33018e-138						Ankrd35	0.321588	7.61914e-89						Xpo7	0.715375	4.10358e-63
Nop53	0.626379	5.7858e-272		Rnf141	0.408194	1.1673e-23		Lmcd1	0.26407	2.63045e-11		Acsbg1	0.327386	0						Brwd1	0.779007	2.01159e-105		Spint1	0.390351	7.95801e-138						Fam234a	0.549273	1.14449e-88						Dapk2	0.559351	5.51333e-63
Qser1	0.435126	5.98537e-271		Ndufa4l2	1.30269	1.34106e-23		Gja1	0.394165	2.87973e-11		Gm16136	0.327276	0						Aggf1	0.637622	3.72903e-105		Tubb4b	1.05287	1.55758e-137						Ybx3	0.694748	9.13706e-88						Srek1	0.646738	6.25931e-63
Bcl2l13	0.409599	2.03123e-270		Rac3	0.260845	1.35364e-23		Maged1	0.410332	2.96019e-11		Trbc2	0.327066	0						Dhx9	0.903148	3.77604e-105		Sytl1	0.422096	6.69744e-137						Itpkc	0.673789	1.0275e-87						Tgfa	0.634175	1.04035e-62
Tgfa	0.369246	2.22014e-270		Ccnb1	0.34753	1.53267e-23		Slc2a1	0.389906	3.04264e-11		Mcur1	0.326206	0						Lmbrd2	0.715987	1.24161e-104		Prxl2b	0.781461	1.51806e-136						Tmprss13	0.307188	1.0806e-87						Gpsm2	0.586223	1.23012e-62
Camsap2	0.69762	2.78226e-270		Cenph	0.256251	1.53455e-23		Wwox	0.288847	3.15424e-11		Dffa	0.324892	0						Akirin1	0.77773	1.4279e-104		Blzf1	0.431045	8.80851e-136						Cgn	0.250511	1.14173e-87						Hdac4	0.638521	1.57138e-62
Suclg2	0.339839	2.80118e-270		Atic	0.287664	1.76735e-23		P4ha1	0.404297	3.16039e-11		Tmem54	0.313919	0						Celsr1	0.464789	1.6547e-104		Itprid2	1.05471	1.41458e-135						Ckmt1	0.401545	1.18873e-87						Sfpq	0.583485	2.25139e-62
Rpl18a	0.769023	3.01421e-270		Cks1b	0.511052	2.61829e-23		Camsap2	0.484316	3.72967e-11		Irx3	0.312649	0						Usp53	0.663205	2.51519e-104		Jup	1.06618	2.52899e-135						Prom2	0.331563	1.19758e-87						Ktn1	0.591765	2.52657e-62
Ptpn4	0.5404	4.43698e-270		Lima1	0.968493	2.73018e-23		Tgfbi	0.348703	3.79235e-11		Pgap1	0.311964	0						Pias1	0.717936	3.16274e-104		Idi1	0.830584	3.1201e-135						Epn2	0.537411	1.22266e-87						Nipbl	0.616255	2.59729e-62
Paics	0.327429	7.83985e-270		Eif4e3	0.428823	2.77638e-23		Ccn4	0.281226	3.89854e-11		Aadac	0.31173	0						Usp15	0.718117	3.26801e-104		Pla2g4e	0.385332	3.99421e-135						Efnb1	0.431141	1.3993e-87						Ctdspl	0.645071	2.78787e-62
Ddr1	0.314842	9.42516e-270		C1qtnf12	0.374582	4.72791e-23		Mmp23	0.348042	4.9774e-11		Sh3gl2	0.307251	0						Polb	0.73408	3.60417e-104		Aqp9	0.356268	5.87574e-135						Fam25c	0.741298	3.36984e-87						Ash1l	0.696415	3.15993e-62
Rpl35	0.885712	6.39387e-268		Cep290	0.423983	4.85375e-23		Mmp14	0.357488	5.3538e-11		Nrip3	0.306347	0						Mcmbp	0.696915	5.34367e-104		Arhgap32	1.13868	9.56768e-135						Yes1	0.542671	5.3956e-87						Tax1bp1	0.586727	3.43263e-62
Tacstd2	0.683391	1.56267e-267		Tmtc3	0.543453	5.05416e-23		Ust	0.331593	5.36296e-11		Gm47071	0.306042	0						Gm47167	0.448092	1.76906e-103		Laptm4b	0.666909	1.63892e-134						Lsr	0.370076	6.69332e-87						Usp53	0.701263	4.24102e-62
Rpl8	0.735641	1.73168e-267		Ociad2	0.340131	5.33499e-23		Endod1	0.42179	7.0576e-11		Gdpd2	0.305453	0						Rere	0.826246	6.74996e-103		Zfp750	0.453299	2.17367e-133						Cbr3	0.319976	6.69449e-87						Fxyd3	0.715708	4.78945e-62
Impdh2	0.404771	1.32643e-266		Ptpre	0.695937	5.97088e-23		Ddr2	0.296192	7.62573e-11		Rhbg	0.304517	0						Pds5a	0.76213	1.21602e-102		Rps6kb2	0.29619	4.53424e-133						Ptpn3	0.574339	8.80701e-87						Zfp326	0.692184	1.15189e-61
Pxdc1	0.635858	2.11098e-266		Klc1	0.822533	6.62942e-23		Rpn1	0.506092	7.86565e-11		Grhl3	0.303688	0						Wasl	0.753381	1.78862e-102		Tjp2	1.19921	1.40367e-132						Mindy3	0.807288	1.53541e-86						Zfp644	0.667911	1.38583e-61
Clec2g	0.337657	2.14237e-266		Fbln2	1.0291	7.49599e-23		Ppfibp1	0.373165	8.46003e-11		Cdkn2b	0.303276	0						Mpzl3	0.844859	3.88292e-102		Kif13b	1.2177	7.17091e-132						Trp63	0.576814	1.63586e-86						Nckap1	0.694319	1.69829e-61
Anxa2	0.750152	2.49815e-266		Gjb3	0.348928	7.99465e-23		Col27a1	0.284264	9.71305e-11		Adh7	0.300991	0						Oga	0.681897	4.36094e-102		Iffo2	0.9255	1.06115e-131						Ranbp9	0.736734	1.66042e-86						Zfp148	0.729778	1.70823e-61
Sfn	0.815248	6.29081e-266		Cdc42bpa	0.782818	8.28586e-23		Hells	0.272082	9.80153e-11		Epha1	0.297597	0						Cast	0.852446	4.89886e-102		Inava	0.384635	1.5297e-131						Rbp2	0.368374	4.60769e-86						Ctdspl2	0.596952	1.82352e-61
Rps9	0.666957	7.55688e-266		Uba2	0.690354	8.40599e-23		Actg1	0.326464	1.00851e-10		Mycl	0.294254	0						Slc25a13	0.584326	4.90258e-102		Plpp6	0.281349	2.51563e-131						Ptpn4	0.591616	1.35287e-85						Prkce	0.777819	2.09226e-61
Gpc4	0.385498	7.77742e-266		Ndrg1	1.40521	8.49162e-23		Tuba4a	0.367354	1.09923e-10		Tmprss13	0.293937	0						Cpeb3	0.864447	7.78317e-102		Prnp	0.869484	3.47311e-131						Trbc2	0.42209	1.81714e-85						Rps6kb1	0.616415	3.68831e-61
Trerf1	0.544236	1.26002e-265		Nabp1	0.346706	9.40775e-23		Plcb4	0.319683	1.11922e-10		Gsta2	0.292524	0						Clca2	0.554916	1.28075e-101		Ptgr1	0.559264	5.34929e-131						Mpzl2	0.351667	1.9829e-85						Rps6ka1	0.362074	6.61984e-61
Nudt5	0.38344	2.60217e-265		Gm2164	0.471124	9.70321e-23		Mark1	0.29303	1.34921e-10		Tuba8	0.291094	0						Tlk1	0.770173	1.62886e-101		Cldn1	0.925999	1.00311e-130						Spink5	0.864874	2.11394e-85						Ank	1.51598	8.14729e-61
Adgrg6	0.497893	5.1884e-265		Ccnd1	0.591009	9.91671e-23		Tns4	0.482963	1.39547e-10		Sort1	0.288463	0						Abhd6	0.724827	1.87889e-101		Dpp3	0.536148	9.79479e-130						Pgap1	0.5	2.59204e-85						Cnst	0.468877	9.16673e-61
Epha4	0.730483	5.62852e-265		Fam210a	0.301104	1.08275e-22		Pgk1	0.390968	1.67019e-10		Teddm3	0.288417	0						Nup98	0.731372	2.08572e-101		Defb6	1.27111	1.33098e-129						Osbpl5	0.369652	3.51301e-85						Larp4	0.70601	9.54809e-61
Hmgb1	0.879714	9.11306e-265		Smurf1	1.068	1.18207e-22		Myadm	0.436163	1.7602e-10		Nipal1	0.287819	0						Tmem245	0.683146	3.32476e-101		Epha1	0.310839	3.46499e-129						C1qtnf12	0.320383	5.18826e-85						Esyt2	0.74671	1.00701e-60
Nfia	0.892778	1.203e-264		Vangl2	0.380691	1.21159e-22		Hnrnpab	0.407367	2.67437e-10		Psat1	0.287405	0						Cdk6	0.826659	7.18055e-101		Rasgrp1	0.276715	8.93705e-129						Arhgap5	0.631749	9.81797e-85						Chmp4c	0.416588	3.5074e-60
Snhg12	0.389958	1.45732e-264		Cenpk	0.253093	1.30027e-22		Atp10a	0.337094	2.69925e-10		Rhbdl2	0.286912	0						Faf1	0.789684	1.62688e-100		Ahnak2	0.868441	2.60688e-128						Ammecr1	0.591621	3.51706e-84						Spred2	0.687696	3.94958e-60
Smg1	0.823318	1.47956e-264		Phlda3	0.728519	1.33609e-22		Hsd17b7	0.331507	2.71285e-10		Cyb561	0.286558	0						Ppp2r2a	0.687415	1.77291e-100		Tead3	0.448318	1.20469e-127						Aig1	0.568403	4.50796e-84						Jag1	0.878809	4.12766e-60
Glo1	0.402154	2.86002e-264		Pqlc3	0.363407	1.49928e-22		Flna	0.514254	3.43956e-10		Adtrp	0.28289	0						Gm26917	0.764447	2.01025e-100		Paqr5	0.324641	1.24605e-127						Pdcd4	0.590485	5.48986e-84						Setd2	0.608628	5.8173e-60
Rab30	0.437666	3.03293e-264		Esrp1	0.762707	1.53599e-22		Lima1	0.384619	3.94911e-10		Bpifc	0.282452	0						Tbl1x	0.806108	2.20804e-100		Prrg2	0.407297	2.90178e-126						Krtdap	0.96744	6.56085e-84						Hr	0.519349	7.55476e-60
Eed	0.448918	3.62146e-264		Fam126a	0.943073	1.61622e-22		Thy1	0.261415	4.34746e-10		Hook1	0.278647	0						Cers3	0.568276	2.97672e-100		Cttnbp2	0.46022	4.03644e-126						Shroom2	0.420244	7.26815e-84						Serpinb5	0.57731	8.18577e-60
Cd2ap	0.75991	8.37936e-264		Agbl3	0.317291	1.61707e-22		Large1	0.321267	4.55289e-10		Dab1	0.278556	0						Setd5	0.744535	3.34411e-100		Plekhg1	0.611725	4.99143e-126						Notch3	0.264028	7.55849e-84						Hnrnph1	0.605453	9.4855e-60
Ppp1r13l	0.253287	2.70392e-262		Rreb1	1.22529	1.74255e-22		Cct6a	0.463426	4.64326e-10		Fam210b	0.277376	0						Sema3d	0.796814	3.65151e-100		Ttc9	0.410304	1.88231e-125						Atad2b	0.715897	1.02694e-83						Gm47283	0.576908	1.48201e-59
Xrn2	0.672915	1.03554e-260		Kif20b	0.368056	2.14087e-22		Hbegf	0.327988	4.73506e-10		Paqr3	0.276095	0						Dnajc5	0.775289	1.0549e-99		Gm15987	1.22417	4.80953e-124						Cdkl5	0.367634	1.60846e-83						Tspan9	0.637131	1.50201e-59
Arhgap5	0.683288	1.24219e-260		Myo19	0.329641	2.41195e-22		Rplp1	0.360535	5.86975e-10		Kctd1	0.275908	0						Ecpas	0.737037	1.29491e-99		Klf3	0.796568	8.82687e-124						Cds1	0.5012	1.82579e-83						Csrp1	0.932446	1.71954e-59
Exph5	0.253597	1.95367e-260		Myh9	0.951674	3.08063e-22		Ssrp1	0.440544	6.54235e-10		BC016579	0.271308	0						Atg3	0.886651	1.38687e-99		Esrp1	0.854645	9.42367e-124						Fam83g	0.423913	2.01732e-83						Arih1	0.792148	1.98655e-59
Srpk2	0.75921	4.66169e-260		Gpc1	0.563221	3.27631e-22		Hmgcs1	0.35122	7.12501e-10		Nrtn	0.271083	0						Larp1	0.701101	2.44516e-99		Agpat4	0.915071	1.39605e-123						Bicd2	0.543454	2.08457e-83						Larp1	0.637229	3.08959e-59
Rpl39	0.791655	2.36695e-259		Aqp3	1.15782	4.24249e-22		Eef1g	0.399571	7.85655e-10		Hsd17b7	0.268737	0						Acaca	0.825284	4.11434e-99		Ovol1	0.591565	2.64806e-123						Tmem79	0.292323	1.01224e-82						Npepps	0.712407	3.54372e-59
Sema3f	0.258589	3.07888e-259		Fam83b	0.588323	5.77242e-22		Hspd1	0.439265	7.90363e-10		Klk11	0.268542	0						Pof1b	0.954041	4.6215e-99		Gdpd1	0.428469	8.73824e-123						Arl4a	0.653074	1.405e-82						Tuft1	0.573747	6.59811e-59
Ehf	0.484591	1.16041e-258		B3galnt2	0.54257	7.01116e-22		Eprs	0.482856	8.10193e-10		Tyro3	0.268434	0						Adgrg6	0.7098	4.6315e-99		Tec	0.902714	5.02432e-122						Larp1b	0.494123	1.51308e-82						Nsd3	0.62004	6.95535e-59
Il13ra1	0.761392	1.4081e-258		Sema6d	0.4301	7.62512e-22		Sh3pxd2a	0.352363	8.21788e-10		Crybg2	0.266837	0						Fgfr3	0.46239	4.76682e-99		Guk1	0.61704	5.963e-122						Pcyox1	0.47602	2.33777e-82						Map3k20	0.640694	7.25785e-59
Map2k4	0.90616	1.4156e-258		Zfp395	0.370044	1.16369e-21		Hist1h1e	0.427605	8.68645e-10		Nipal4	0.266386	0						Slain2	0.773739	4.88449e-99		Uchl3	0.609498	4.21576e-121						Frat2	0.263469	2.4618e-82						Crebbp	0.607386	7.83061e-59
Pcnx	0.809513	1.55207e-258		Sh3pxd2a	1.09458	1.50098e-21		Pls3	0.362334	8.90409e-10		Olfm2	0.265452	0						Eps8l2	0.51647	9.46394e-99		Dedd2	0.496532	4.65765e-121						Ablim1	0.576259	5.1485e-82						Luc7l3	0.627057	8.53398e-59
Mllt3	0.622585	1.9324e-258		Gstcd	0.275828	1.77554e-21		Snd1	0.43714	8.99042e-10		Atp10b	0.264994	0						Limd1	0.853071	1.05882e-98		Cds1	0.817643	9.8367e-121						Bcl11a	0.408863	6.55209e-82						Tnrc6a	0.71669	1.17788e-58
Rpl23a	0.718041	2.36654e-258		Ccnb2	0.284947	2.13842e-21		Loxl3	0.342595	9.19586e-10		Acad11	0.264415	0						Usp25	0.713523	2.04826e-98		Rab25	0.815634	1.2673e-120						Psph	0.495624	1.04991e-81						Vgll4	0.748482	1.3735e-58
Tle4	0.837313	3.49856e-258		Cep89	0.291645	2.2072e-21		Tgfa	0.395327	1.03881e-09		Pak6	0.264396	0						Shroom2	0.594073	2.71012e-98		Fam83g	0.57616	3.22838e-120						Rab40c	0.549756	1.20341e-81						Bclaf1	0.645312	3.43679e-58
Ddx27	0.284156	1.06356e-257		Dusp7	0.673785	2.31622e-21		Mapk6	0.403292	1.03927e-09		D7Ertd443e	0.261532	0						Pkp1	0.551271	3.65917e-98		Endou	0.63135	3.79465e-119						Sh3gl2	0.379713	1.68403e-81						Sema5a	0.734461	7.2425e-58
Nop58	0.504245	2.25715e-257		Jpt2	0.415993	2.32677e-21		Car12	0.392644	1.06621e-09		Dhcr7	0.260801	0						Itpr3	0.563642	3.78003e-98		Cep170b	0.494781	4.47959e-119						5330438D12Rik	0.356818	1.94399e-81						Clpx	0.625749	8.05083e-58
Thsd4	0.57519	4.73301e-257		Pfkp	0.989504	2.32862e-21		Epb41l3	0.333015	1.08728e-09		Kctd15	0.259466	0						Gna14	0.61013	1.19801e-97		Dsg1b	1.00372	4.66753e-119						Akirin1	0.698238	2.1004e-81						Megf9	0.620504	8.70633e-58
Rpl9	0.714913	5.90176e-257		Irx5	0.425181	2.95681e-21		Gpx8	0.387778	1.20859e-09		Scd1	0.258244	0						Tax1bp1	0.598643	1.29622e-97		Btg2	1.19688	6.54003e-119						Eml4	0.782764	2.88382e-81						Arhgap5	0.611458	9.16405e-58
Dhx9	0.669543	6.3333e-257		Mcph1	0.425364	3.0775e-21		Itga2	0.32258	1.46187e-09		Mfap3l	0.25672	0						Rngtt	0.804374	1.42459e-97		Dlg2	1.11499	8.9402e-119						Cdcp1	0.544884	4.37287e-81						Ttc3	0.695809	1.02117e-57
Tmem87a	0.527251	1.07178e-256		Mmp3	1.22408	3.15085e-21		Hnrnpa1	0.479468	1.55028e-09		Rnf144b	0.255484	0						Bmpr1a	0.718288	5.15296e-97		Slc27a4	0.364376	1.72388e-118						Sh3d19	0.604821	4.47309e-81						Setd5	0.67025	1.64462e-57
Unc45a	0.384154	1.23725e-256		Pgm1	0.392494	3.26818e-21		Lamb1	0.277636	1.59766e-09		Gm20219	0.254778	0						Usp6nl	0.915292	7.73357e-97		Zdhhc21	0.866219	4.37756e-118						Erlin1	0.417822	5.51983e-81						Rnf38	0.736928	2.01061e-57
Arhgef3	0.690528	2.42109e-256		Bub1b	0.316834	3.89673e-21		Gli3	0.354255	1.80562e-09		Fut2	0.252808	0						March7	0.611048	8.0202e-97		Hmgcr	0.717577	1.24367e-117						Nckap1	0.664898	1.00941e-80						Fbxo11	0.703674	2.1114e-57
Rps14	0.703376	4.08845e-256		Flrt3	0.657966	4.0781e-21		Ptgfrn	0.48133	1.96913e-09		Rps13	0.807611	3.22933e-303						Tacstd2	0.59639	1.10287e-96		Amotl2	0.590243	1.26455e-117						Nrtn	0.354881	5.60472e-80						mt-Nd3	0.514216	5.89839e-57
Met	0.501428	4.16994e-256		Sfn	1.12519	5.20264e-21		Tshz3	0.298313	2.27481e-09		Bicd2	0.625712	6.79751e-302						Yes1	0.578987	5.77149e-96		Adtrp	0.263101	1.43234e-117						Gtf2ird1	0.489368	6.06284e-80						Dhx15	0.589614	7.13617e-57
Naca	0.676228	9.56705e-256		Tuba4a	0.800734	5.9038e-21		Vkorc1	0.367433	2.36827e-09		Uba52	0.817964	1.89299e-301						Lnpep	0.845932	6.51388e-96		Ptgs1	0.955972	1.83732e-116						Sppl3	0.757537	9.30013e-80						Mtmr11	0.391027	1.10509e-56
Smg7	0.6882	1.55169e-255		Kif24	0.301994	6.4117e-21		Ranbp1	0.397479	2.48544e-09		Dbnl	0.456454	1.94977e-301						Top2b	0.665717	7.28684e-96		2200002D01Rik	0.415158	1.89313e-116						Hsdl2	0.403973	1.39792e-79						Arid1a	0.627998	1.18323e-56
Mir100hg	0.74272	2.11967e-255		Fbln1	0.477255	6.88634e-21		Tent5a	0.384646	2.58869e-09		Pon2	0.745875	1.90979e-300						Baz2a	0.647548	7.94803e-96		Cebpa	0.539389	1.98235e-116						Etfdh	0.36884	1.88159e-79						Ubn2	0.696535	1.26225e-56
Eef1b2	0.763723	5.71335e-255		Dag1	0.685959	7.34981e-21		Dnajc10	0.463273	2.61786e-09		Gm14164	0.422976	2.2077e-300						Gspt1	0.646639	1.48706e-95		Usp6nl	1.12838	1.62341e-115						Hace1	0.55124	2.43129e-79						Slc20a2	0.614178	1.34424e-56
Ptger4	0.334368	1.46332e-254		Mpzl2	0.47563	7.89242e-21		Sptbn1	0.340832	2.69836e-09		Hmgcs1	0.78809	4.18057e-299						Mb21d2	0.628526	2.31103e-95		Fosl1	0.730116	2.4677e-115						Myo1d	0.787491	2.46043e-79						Mkln1	0.676048	1.50265e-56
Clasp2	0.790931	6.42611e-254		Apbb2	0.690966	8.02855e-21		Ppp1r14b	0.399096	3.6582e-09		Tspan9	0.610063	1.90422e-298						Stat3	0.776896	2.47072e-95		Rhov	0.298234	3.37273e-115						Arhgap44	0.460916	2.62564e-79						Ncoa1	0.721016	1.72007e-56
Rpl35a	0.656933	2.35959e-253		Fblim1	0.408193	9.39658e-21		Rpl41	0.336789	3.73605e-09		Nlrc5	0.612066	2.26838e-298						Klf12	1.20764	2.474e-95		Ift20	0.697572	3.63447e-115						Gm16136	0.256463	3.94449e-79						Wdr43	0.637355	2.56163e-56
Lgr4	0.430497	3.97571e-253		Gtf3c1	0.560228	1.0209e-20		Spats2l	0.257771	3.78657e-09		Rpl22	0.785986	5.79906e-298						Phlpp1	0.656262	7.11216e-95		Ttpal	0.327623	4.25262e-115						Rangap1	0.48841	4.14561e-79						Pds5a	0.724754	2.79892e-56
Fbl	0.383558	7.18447e-253		Fut8	0.928194	1.2625e-20		P4ha3	0.339766	3.9511e-09		Acaa2	0.400014	1.21486e-297						Rlf	0.693811	7.34353e-95		Klhl18	0.414563	5.19308e-115						Sh3rf2	0.470339	4.34262e-79						Efnb1	0.470727	3.16394e-56
Rplp2	0.617584	7.21797e-253		Ahdc1	0.393393	1.29421e-20		Gphn	0.286411	4.12608e-09		Hspb1	1.04378	2.65391e-297						Rab6a	0.703578	8.05602e-95		Zfp706	0.891045	7.53213e-115						Zdhhc5	0.541282	4.40755e-79						Qser1	0.595548	3.21715e-56
Rplp1	0.648421	8.98165e-253		Limk1	0.270006	1.39634e-20		Cd24a	0.263843	4.3563e-09		Rps23	0.779543	4.37767e-297						Dcaf1	0.642023	9.78318e-95		Egr2	0.527828	9.29297e-115						Aldh3a2	0.344379	4.83792e-79						Epha4	0.777047	3.33571e-56
Itgb6	0.352255	1.0684e-252		Mis18bp1	0.345701	1.62792e-20		Selenom	0.30078	4.65781e-09		Rpl26	0.771303	1.59365e-295						Actn4	0.640575	1.14252e-94		Sh3bgrl2	0.376269	9.44452e-115						Gskip	0.407406	5.62767e-79						Gm26917	0.662547	3.63685e-56
Cd109	0.548518	1.44754e-252		Maml2	0.918917	1.94346e-20		Ktn1	0.424422	4.68637e-09		Hagh	0.402111	3.8433e-295						Gpr160	0.559568	1.74867e-94		Wwtr1	0.771756	4.5135e-114						Aopep	0.783125	8.43759e-79						Zfp280d	0.692115	3.76376e-56
Eef1a1	0.649292	1.87057e-252		Lrrc4	0.538015	2.11706e-20		Zfp809	0.452981	7.2456e-09		Rpl36	0.858667	5.53626e-295						Aftph	0.700259	2.12555e-94		Prrg4	0.464677	5.41684e-114						Rpl23a	0.675979	1.07096e-78						Tbc1d8	0.452755	3.82185e-56
Pnn	0.49835	2.60194e-252		Cep164	0.423756	2.53021e-20		Htra1	0.434683	7.78582e-09		Rps6	0.791808	6.47269e-295						Rbm27	0.698689	2.55441e-94		Clec2g	0.48398	5.44215e-114						Plekhn1	0.399461	1.21593e-78						Epb41l4a	0.671639	3.8958e-56
Adk	0.556458	3.24505e-252		Rere	1.05055	3.09391e-20		Slc10a7	0.381081	8.17841e-09		Rpl19	0.753104	1.06311e-294						Psmd11	0.702533	2.64015e-94		Avpi1	0.976903	9.75005e-114						Klk6	0.455284	1.34115e-78						Lemd3	0.742341	5.14954e-56
Anxa8	0.496375	3.32182e-252		Igsf3	0.621899	4.40789e-20		Hivep2	0.283284	1.01453e-08		Abhd5	0.579558	3.95703e-294						Camsap1	0.647262	4.88454e-94		6430548M08Rik	0.469683	1.26331e-113						Llgl2	0.253874	2.07605e-78						Naa15	0.601319	5.34313e-56
Taf1d	0.543144	4.50327e-252		Tmem51	0.453544	4.79415e-20		Mrfap1	0.397134	1.02532e-08		Klf4	0.827711	1.26e-293						Klhl7	0.734605	6.01615e-94		Rbp2	0.595704	2.03706e-113						Abhd5	0.528626	3.12459e-78						Adk	0.726995	7.33652e-56
Zfp1	0.260766	8.20054e-252		C77080	0.416586	5.11743e-20		Gnas	0.344806	1.10925e-08		Rpl17	0.778381	2.52703e-293						Ippk	0.566569	7.13921e-94		Spsb3	0.386462	2.92811e-113						Trim2	0.510548	3.16845e-78						Sppl3	0.690878	8.89835e-56
Set	0.663873	8.9491e-252		Grhpr	0.267907	7.07389e-20		Idi1	0.290827	1.18574e-08		Zfp385a	0.332109	9.54914e-292						Ptpn4	0.76708	7.69986e-94		Mvk	0.293525	7.56686e-113						Nipal4	0.260557	4.27787e-78						Smurf2	0.773285	1.07679e-55
Ccnd1	0.26409	1.8146e-251		Efna1	0.403907	7.12516e-20		Fam83b	0.299652	1.20349e-08		Sesn2	0.425206	2.52448e-291						Chl1	0.582429	9.77258e-94		Dynll1	1.12407	7.1318e-112						Pex3	0.360995	4.44665e-78						9930021J03Rik	0.664888	1.20479e-55
Abcg2	0.334549	3.87679e-251		Ccdc58	0.426903	7.57288e-20		Uck2	0.352542	1.33231e-08		Scrib	0.251774	3.47514e-291						Atg13	0.675737	9.9067e-94		Abtb2	1.13928	2.36426e-111						Rab3d	0.38306	8.90569e-78						Stt3b	0.651372	1.36708e-55
Cblb	0.832481	1.3419e-250		Smc2	0.480739	9.22022e-20		Pdlim7	0.325402	1.43755e-08		Fasn	0.312167	3.49054e-291						Hsd17b12	0.741687	1.01083e-93		Dock6	0.332579	5.15924e-111						Dbndd2	0.258414	9.40829e-78						Socs5	0.541553	1.45691e-55
Tnfrsf12a	0.378454	5.48932e-250		Racgap1	0.349639	1.03234e-19		Crtap	0.382127	1.60248e-08		Cecr2	0.586501	6.53706e-291						Piga	0.485099	1.0448e-93		Ndfip2	1.0032	5.703e-111						Atp9a	0.296526	1.00995e-77						Ahcyl1	0.656984	1.53209e-55
Mb21d2	0.443772	7.10942e-250		Pdia4	0.671203	1.05839e-19		Mfap2	0.254732	2.33541e-08		Nhsl1	0.749921	1.67957e-290						Btaf1	0.808252	1.05491e-93		Crb3	0.276794	6.90156e-111						Nrip3	0.275945	1.08943e-77						Mon2	0.71823	1.75241e-55
Rps25	0.6675	1.0729e-249		Nrbp2	0.306559	1.17368e-19		Acsl3	0.378921	2.95874e-08		Arhgef10l	0.642615	1.97908e-290						Trip12	0.669497	1.11708e-93		Sorbs1	0.61806	7.22775e-111						Srcin1	0.291636	1.46863e-77						Hnrnpm	0.535398	1.93807e-55
Bok	0.302981	1.36653e-249		Pou3f1	0.583385	1.26268e-19		Plpp3	0.397185	3.16705e-08		Arl4a	0.604245	3.57392e-290						Hnrnpd	0.646586	1.24077e-93		Fam43a	0.342681	9.62371e-111						Cd2ap	0.695972	1.63002e-77						Irx2	0.451533	2.17171e-55
Rnd3	0.77838	8.2509e-249		Carmil1	0.720602	1.77893e-19		Slc38a10	0.353901	3.58604e-08		B4galnt3	0.255627	1.03214e-289						Gatad2b	0.686369	1.46762e-93		Dusp22	0.649781	9.64701e-111						Gfod1	0.370021	2.13648e-77						Kmt2e	0.653107	2.86767e-55
Ago4	0.302866	1.22089e-248		Foxk2	0.462369	1.78028e-19		Erc1	0.350155	4.60453e-08		Gid8	0.276838	1.1191e-289						Acvr1	0.77706	1.80299e-93		Plaat3	0.369694	1.12545e-110						Scnn1a	0.259935	2.96373e-77						Tsc22d2	0.835168	4.84336e-55
Car13	0.452342	2.7999e-248		Hes1	0.438067	1.80465e-19		Ugcg	0.317273	5.44549e-08		Stard5	0.312818	1.94068e-289						Slc25a48	0.44506	1.99314e-93		Prom2	0.406739	1.82539e-110						Ssbp2	0.525747	4.18598e-77						Mast2	0.758803	6.70949e-55
Zfp280c	0.290351	5.13711e-248		Rin2	0.665451	1.88214e-19		Arhgap29	0.27656	5.46916e-08		Mon1a	0.267278	7.63047e-289						Itgb6	0.561823	2.09684e-93		Slc6a8	0.613252	5.43523e-110						Rc3h1	0.81142	4.52363e-77						Cd109	0.722402	7.93754e-55
Vps13a	0.579503	6.74363e-248		Akap6	0.294891	1.96691e-19		Gpr153	0.267147	5.90435e-08		Rpl18a	0.78268	1.23016e-288						Smox	0.651556	3.1284e-93		Pdzd11	0.391689	5.8269e-110						Ormdl2	0.335091	5.8943e-77						Bcl2	0.462099	1.13363e-54
Limk2	0.332177	1.2282e-247		Erc1	0.877012	1.9838e-19		Myl6	0.365271	6.05715e-08		Ghr	0.706553	3.47433e-287						2610020C07Rik	0.456103	4.59986e-93		Kctd5	0.590034	1.5199e-109						Sfn	0.669928	1.02611e-76						Nxn	0.878879	1.61358e-54
Mcm6	0.263881	1.32096e-247		Plekha2	0.284268	2.05688e-19		P3h1	0.276487	6.15369e-08		Eef1b2	0.838436	3.38438e-286						Mboat1	0.614025	6.85235e-93		Hmgcs1	0.925055	1.03622e-108						Kalrn	0.47634	2.51428e-76						Pkn2	0.61487	1.91037e-54
Ptprz1	0.305282	5.31295e-247		Mtap	0.287129	2.17571e-19		Ak1	0.307339	7.32051e-08		Egr3	0.343159	8.23981e-286						Socs6	0.530319	1.42291e-92		Cpeb2	1.07361	1.50591e-108						Cish	0.357546	2.60132e-76						Arhgap39	0.390556	2.18743e-54
Pa2g4	0.399514	1.7822e-245		Ncapd3	0.449246	2.28298e-19		Ddost	0.385275	7.32607e-08		Sltm	0.811315	3.3216e-285						Atxn1	0.847537	1.46527e-92		Fdft1	0.691862	1.59556e-108						Map2	0.509652	3.76956e-76						Srpk2	0.68147	2.30897e-54
Exosc7	0.255604	5.36924e-245		Tpk1	0.339215	2.3616e-19		Tcf7l1	0.269163	7.66478e-08		Bcl11b	0.602624	9.06109e-285						Sumo1	0.749663	1.51216e-92		Sesn2	0.526565	2.38193e-108						Bace2	0.418058	6.0877e-76						Nsd2	0.692024	2.41981e-54
Crim1	0.672071	8.23999e-245		Extl3	0.464291	2.47401e-19		Dip2b	0.30291	9.71611e-08		Erlin1	0.32615	4.40893e-284						Kif5b	0.629389	3.99953e-92		Rab38	0.790357	3.36937e-108						Usp6nl	0.684718	6.73872e-76						Kdm6a	0.734648	3.0081e-54
Emp2	0.511986	2.34125e-244		Pcyox1	0.601769	2.49363e-19		Sec23a	0.390181	9.92462e-08		Bag4	0.340909	3.37273e-282						Nipbl	0.616508	6.53767e-92		Gstm5	0.512946	6.74476e-108						Maoa	0.732263	1.43854e-75						Zzz3	0.616451	4.21394e-54
Rpsa	0.68812	2.68045e-244		Ccnf	0.330324	3.47678e-19		Hspe1	0.352582	9.95898e-08		Uqcc2	0.71894	5.27317e-282						Ube2h	0.727004	8.16924e-92		Lrrc28	0.710001	2.88907e-107						Pde12	0.294024	1.99586e-75						Gtf2f2	0.815408	4.89714e-54
Phldb2	0.577408	2.09091e-243		Rassf5	0.346917	3.55565e-19		Eno1	0.377198	1.08259e-07		Glo1	0.453375	8.79681e-281						Pon2	0.804888	9.64654e-92		Megf9	0.809306	1.31663e-106						Irf6	0.400898	2.50286e-75						Huwe1	0.750603	5.65054e-54
Sf3b3	0.498535	2.45292e-243		Pkp3	0.622019	4.67269e-19		Sept11	0.342209	1.29365e-07		Zdhhc21	0.591175	9.00033e-281						Macc1	0.749626	9.86582e-92		Oas1f	0.443192	2.28461e-106						Grpel2	0.353561	3.1862e-75						Dsc3	0.446344	5.76405e-54
Fam83b	0.308322	5.14967e-243		Cep57l1	0.269014	4.80548e-19		Tubb6	0.360355	1.67458e-07		Rps9	0.674441	2.07612e-280						Rsf1	0.789256	1.20647e-91		Ly6d	1.00845	4.31566e-106						Abcd3	0.550466	3.49777e-75						Kcnq1ot1	0.637436	6.52638e-54
Trappc10	0.412947	3.0726e-242		Nav1	0.738876	4.82772e-19		Kctd11	0.265952	1.85934e-07		Ptpn3	0.54483	7.5526e-280						Fhit	0.976835	1.71189e-91		Ephb6	0.400472	5.41698e-106						Hras	0.516238	4.53065e-75						Rassf9	0.568193	7.07003e-54
Rps28	0.749137	3.47235e-242		Mir100hg	0.579048	5.37366e-19		Itga3	0.350183	1.86854e-07		Mtmr1	0.440746	3.08641e-279						N4bp2l2	0.656074	3.15391e-91		Rhou	0.385136	3.41611e-105						Lgalsl	0.393631	5.65525e-75						Pdzrn3	1.5663	8.43916e-54
Stmn1	0.742979	5.71178e-242		2200002D01Rik	0.411666	5.89204e-19		Rnf152	0.321178	2.09502e-07		Aacs	0.279685	2.19718e-278						Larp1b	0.612756	5.98968e-91		Pou2f3	0.514145	3.75094e-105						Pmm1	0.325724	5.76104e-75						Tead4	0.462633	1.12546e-53
Notch1	0.379012	1.13516e-241		Tbc1d8b	0.393536	6.07036e-19		Ssr1	0.368356	2.11877e-07		Ctnnd1	0.792548	9.21482e-278						Ipo7	0.687542	1.08907e-90		Zfyve9	0.732534	4.24456e-105						Prkci	0.485409	6.0062e-75						Nasp	0.698614	1.34571e-53
Snrpg	0.636013	2.03393e-241		Armh3	0.519943	6.07515e-19		Cntln	0.297504	2.20909e-07		Nxt1	0.256358	3.48087e-277						Memo1	0.734998	1.17009e-90		Cited2	0.635832	4.35319e-105						Brap	0.392019	7.03361e-75						Lncppara	0.479343	2.30062e-53
Sgk3	0.450865	1.09452e-240		Snx24	0.31256	6.23686e-19		Rpl22l1	0.336628	2.22491e-07		Rpl39	0.827806	3.9339e-277						Anxa7	0.645209	1.19065e-90		S100a14	0.745117	1.8998e-104						Lgr4	0.551406	9.28079e-75						Rif1	0.611664	2.31527e-53
Nckap1	0.64278	3.82146e-240		Papss2	0.468906	6.35997e-19		Nme2	0.355425	2.25133e-07		Trappc6a	0.384607	4.93196e-277						Ece1	0.667199	1.41868e-90		Plet1	1.31897	1.95249e-104						Dlg3	0.280803	9.94702e-75						Pdlim5	0.999949	5.89696e-53
Ndufb11	0.540372	6.483e-240		Twf1	0.767366	6.50603e-19		Dad1	0.435813	2.67891e-07		Rhod	0.303453	4.93627e-277						Nfat5	0.695095	2.19533e-90		Dhcr24	0.432551	2.32129e-104						Ptgs1	0.551376	1.21979e-74						Fbxl17	0.692674	6.20809e-53
Esyt2	0.979887	6.77714e-240		Rab30	0.487019	7.36752e-19		Pros1	0.389729	2.73449e-07		Prkci	0.565763	5.41032e-277						Strn	0.648288	2.31454e-90		Lypd6b	0.783961	3.03196e-104						Dgka	0.44277	1.29948e-74						Csnk1a1	0.5671	6.49145e-53
Hmgn2	0.32334	1.56986e-239		Fer	0.970162	8.28848e-19		Kif21a	0.266008	2.75485e-07		Kif21a	0.61602	3.52246e-276						Fnbp1	0.664417	3.25573e-90		Hook1	0.380757	4.22629e-104						Papss1	0.507375	1.3292e-74						Dzip1l	0.344141	6.60391e-53
Fam162a	0.724925	2.8069e-239		Ppard	0.844776	9.03327e-19		Trio	0.366925	3.19727e-07		Rxra	0.323337	4.00896e-276						Ubr3	0.703856	6.87208e-90		Itpkc	0.83985	2.52637e-103						Sytl1	0.261871	1.64916e-74						Nmt2	0.703376	6.65354e-53
Mcm4	0.25557	5.89933e-239		Spidr	0.62283	9.1565e-19		Myof	0.410961	3.42475e-07		Arhgef37	0.268528	5.03038e-276						Xpo7	0.698906	7.04414e-90		Cyp2j6	0.342132	2.79053e-103						Klk8	0.495701	3.20393e-74						Arhgap42	0.664254	6.69358e-53
Gja1	0.669052	1.30308e-238		Atp1a1	0.837923	1.02153e-18		Cdh3	0.257675	3.52886e-07		Dusp7	0.46024	4.57565e-275						Srrm2	0.56547	7.19658e-90		Areg	0.560717	3.03766e-103						Esrp2	0.26472	3.47232e-74						Pbx1	0.68054	6.98306e-53
Eps8l2	0.266647	2.90445e-238		Ston2	0.406563	1.04997e-18		Prdx4	0.39701	3.8026e-07		Atp11b	0.800806	1.11099e-274						Pnisr	0.673569	9.81692e-90		Rora	0.738215	6.2535e-103						Dusp7	0.467901	4.63988e-74						Fhdc1	0.455169	8.11135e-53
Rpl27	0.664433	3.4167e-238		Dlgap5	0.325109	1.07356e-18		Lpp	0.296742	4.23237e-07		Asprv1	0.599228	7.6791e-274						Dnmbp	0.820141	1.12847e-89		Smagp	0.54737	8.98942e-103						Myo1e	0.720294	5.18242e-74						Kat6a	0.592831	9.0503e-53
Rps24	0.648674	5.33731e-238		Ttk	0.338342	1.16646e-18		Glo1	0.402874	4.26399e-07		Clcn3	0.592093	2.18091e-273						Pafah1b1	0.646963	1.24351e-89		Gabarapl2	1.11921	9.01812e-103						Mark4	0.486861	7.8905e-74						Dhx9	0.59332	9.07308e-53
Uba52	0.659579	7.12461e-238		Tcim	0.546695	1.30395e-18		Gramd3	0.334945	4.62631e-07		Qars	0.435653	1.55159e-272						Gm47283	0.745798	2.10194e-89		Serpinb3b	0.272268	1.54939e-102						Gpr160	0.305463	9.14351e-74						Ltbp1	0.727218	1.12338e-52
Map3k20	0.776375	1.29227e-237		Ldha	1.12909	1.41171e-18		Cbx5	0.360881	4.6474e-07		Serinc2	0.445268	1.67956e-272						Rel	0.700802	2.72245e-89		Trbc2	0.261618	4.58274e-102						Abhd6	0.433934	1.03595e-73						Gas1	0.510471	2.44479e-52
Stox2	0.442918	1.58833e-237		Pqlc1	0.688746	1.69839e-18		Pak1	0.330713	4.7647e-07		Klf12	0.862737	3.00763e-272						Taf3	0.673945	2.95113e-89		Akirin1	0.815012	9.54806e-102						Baiap2l1	0.50865	1.3632e-73						Tra2b	0.616004	3.36983e-52
Myo1e	0.812781	3.11699e-237		Nvl	0.404728	1.7039e-18		Srsf1	0.410834	4.92185e-07		Sprr1a	1.10359	1.78888e-271						Adam10	0.853203	2.97999e-89		Slc30a4	0.474061	1.56363e-101						Yap1	0.619376	1.90503e-73						Tcf20	0.648277	3.79223e-52
Lrig3	0.266007	4.00083e-237		Slc39a13	0.270418	1.8856e-18		Galnt1	0.403104	4.98843e-07		Baiap2l1	0.468221	2.19534e-271						Nod2	0.634751	3.03191e-89		Slc1a1	0.596316	3.63796e-101						Myo6	0.610991	3.72894e-73						Atl2	0.679977	5.35817e-52
Phb2	0.386189	6.58544e-237		Procr	0.298456	1.92873e-18		Ptk2	0.278839	5.42558e-07		Rpl7	0.699761	3.24396e-271						Sfpq	0.620404	3.61171e-89		Arhgap23	0.694305	5.14205e-101						Chl1	0.535387	4.92312e-73						Ppm1b	0.567294	6.15199e-52
Ppia	0.663648	7.40058e-237		Pdia6	0.789778	2.00625e-18		Kdm5b	0.443994	5.89085e-07		Slc24a3	0.705541	4.97643e-271						Sec24a	0.848553	4.41918e-89		Gsn	1.0422	5.34066e-101						Nav2	0.473407	4.98824e-73						Rnf43	0.443127	6.32981e-52
Cpne8	0.601977	8.44217e-237		Mst1r	0.335378	2.13027e-18		Nap1l1	0.426569	6.41771e-07		Rps27	0.785906	6.09965e-271						Ppp1cb	0.669885	5.12658e-89		Sgpp1	0.748246	9.85458e-101						Magi1	0.48567	5.16904e-73						Inpp4b	0.374769	6.38055e-52
Gm2164	0.324663	9.74864e-237		Aig1	0.738663	2.31856e-18		Morf4l2	0.392734	6.63415e-07		Dynll1	0.83422	6.12597e-271						Rgs20	0.994143	6.73844e-89		Hsd17b7	0.329501	1.18633e-100						Clca3a2	0.311275	5.52703e-73						Trim33	0.605352	7.80612e-52
2900026A02Rik	0.286288	2.38814e-236		Nup155	0.319573	2.45452e-18		Ppib	0.296667	7.63806e-07		Rps10	0.7278	1.94194e-270						Ube2e2	0.838943	7.59227e-89		Pex3	0.380534	1.20014e-100						Serpinb3b	0.27088	6.01111e-73						Vcl	0.740449	9.88629e-52
Acer3	0.727012	3.6188e-236		Slc25a48	0.363421	2.53692e-18		Nhsl2	0.290143	8.09836e-07		Rpl31	0.763524	4.53728e-270						Lysmd4	0.403473	8.01615e-89		Sec11c	0.672326	1.72234e-100						Acsbg1	0.354458	1.08217e-72						Fat2	0.418055	1.09004e-51
Fam241a	0.323543	1.31404e-235		Cuedc1	0.324126	2.91258e-18		Parp8	0.254743	8.21388e-07		Chmp1a	0.343864	4.30848e-269						Satb1	0.362994	1.57641e-88		Barx2	0.389556	2.05692e-100						Dsg1b	0.305225	1.13858e-72						Shb	0.735583	1.72237e-51
Ldlr	0.644853	2.9335e-235		Sec22a	0.461773	3.112e-18		Frmd6	0.300521	8.49428e-07		Mycbp	0.257926	1.70541e-267						Dcbld1	0.631678	1.68766e-88		Eif1ad	0.464499	3.23102e-100						Tom1l2	0.663192	1.19984e-72						Ewsr1	0.582604	2.70578e-51
Imp3	0.282216	1.62792e-234		Pdlim1	0.748183	3.43088e-18		Papss2	0.28291	8.51551e-07		Slc22a23	0.499769	1.76974e-267						Cnot1	0.683018	2.60068e-88		Nr1d1	0.340661	4.38129e-100						Dsc3	0.583123	1.43338e-72						Trip12	0.634016	3.34197e-51
1600010M07Rik	0.266914	2.41888e-234		Calr	1.01649	6.46006e-18		Endou	0.250061	8.86452e-07		Thrb	0.516954	8.27176e-267						Ccnt2	0.633124	3.19087e-88		Lgals7	1.14482	7.37145e-100						Cep170b	0.355954	2.02532e-72						Itga2	0.818418	3.83587e-51
Rab38	0.337013	2.53232e-234		Keap1	0.253084	6.66135e-18		F11r	0.337302	9.69066e-07		Echs1	0.297428	4.99258e-266						Wnk2	0.435612	4.29379e-88		Sprr1b	1.60547	8.71035e-100						Cnot2	0.718322	2.12437e-72						Psme4	0.765263	3.94394e-51
Atrx	0.693682	2.85407e-234		Fam83h	0.279713	6.6705e-18		Twf1	0.406932	1.04238e-06		Desi1	0.416082	2.48195e-265						Adgrf2	1.32209	4.55364e-88		Clip4	0.708166	9.63337e-100						Tom1l1	0.314043	3.76303e-72						Nf1	0.570331	4.28946e-51
Map3k4	0.292031	1.0739e-233		Trak1	0.751272	6.71222e-18		Sh3pxd2b	0.396346	1.06425e-06		Gsn	0.952297	2.49645e-265						Eed	0.652711	9.00997e-88		AI661453	0.382489	9.97761e-100						Zfyve9	0.610385	4.09735e-72						Kansl1	0.624143	4.40297e-51
Sult5a1	0.450375	1.20654e-233		Cenpf	0.677448	7.75147e-18		P3h4	0.316256	1.09077e-06		Dnajb1	0.788582	8.87801e-265						Desi2	0.789937	1.05575e-87		Rhbdl3	0.2992	1.01644e-99						Lbh	0.342566	4.22199e-72						Mcmbp	0.610114	4.5835e-51
Tcerg1	0.569158	4.95e-233		Pja1	0.384039	7.98225e-18		Nbas	0.365155	1.12208e-06		Npepps	0.826796	4.96273e-264						Larp4	0.752696	1.18578e-87		Arhgef10l	0.633395	2.71402e-99						Nrarp	0.28525	4.30734e-72						Myo9a	0.772472	4.58413e-51
Zfp326	0.603226	1.24743e-232		Cd151	0.438202	8.80084e-18		Dsel	0.362237	1.12945e-06		Anxa1	0.69713	3.50822e-263						Fbxw7	0.656474	1.73587e-87		Ankrd22	0.53249	1.12212e-98						Stap2	0.250261	9.47553e-72						Rabep1	0.698967	4.61569e-51
Eef2	0.739441	1.89631e-232		Atp2c1	0.628607	9.96119e-18		Sfr1	0.346853	1.50892e-06		Limk2	0.357286	1.19201e-262						Afap1l2	0.494642	1.94881e-87		Rmnd5a	0.917718	1.68056e-98						Zfp266	0.450564	1.94608e-71						Elf1	0.721623	5.50833e-51
Pou2f3	0.347777	4.22702e-232		Limk2	0.501445	1.00444e-17		Krtcap2	0.300167	1.85997e-06		Rps14	0.704884	3.80659e-262						Nipa2	0.648251	2.63818e-87		Il34	0.463189	5.88862e-98						Hspb8	0.434568	2.7585e-71						Calml3	0.467208	6.01822e-51
Rpl29	0.680563	9.88607e-232		Hbegf	0.82937	1.0095e-17		Rad18	0.312207	1.95792e-06		Ddr2	0.771592	9.75895e-261						U2surp	0.64138	2.70847e-87		Itpr3	0.746456	1.31623e-97						Sh3d21	0.263977	3.28892e-71						Kctd1	0.530842	6.1953e-51
Mindy3	0.727121	1.17907e-231		Kctd11	0.397146	1.0162e-17		Pabpc1	0.369223	2.0297e-06		Tspan8	0.362036	1.88779e-260						B4galnt3	0.584513	3.2413e-87		Map3k8	0.828377	3.83147e-97						Abtb2	0.902569	1.1265e-70						Ppp1cb	0.674878	6.75139e-51
Foxk1	0.345563	1.69161e-231		Clybl	0.59779	1.02648e-17		Rps20	0.280665	2.33549e-06		Ldlr	0.698488	2.43598e-259						Katnbl1	0.678076	4.1699e-87		Rab11fip1	0.556735	5.91927e-97						Pqlc1	0.49299	2.28758e-70						Rtf1	0.599042	9.1313e-51
Flvcr1	0.321297	1.94557e-231		Pcbp3	0.487073	1.03934e-17		Srm	0.315019	2.55925e-06		Vdr	0.383015	3.65786e-259						Sptlc3	1.33941	4.39115e-87		Rapgefl1	0.453213	7.37655e-97						Tead3	0.357316	3.25572e-70						Arhgef28	0.595135	1.04497e-50
Fam135a	0.436207	9.92421e-231		Gsto1	0.81589	1.06135e-17		Tmed3	0.291665	2.56327e-06		Rpl27	0.712065	1.81798e-258						Appbp2	0.618947	5.31767e-87		Rbbp6	0.876544	1.98054e-96						Il34	0.409767	4.18484e-70						Ndufs4	0.617771	1.11253e-50
Carnmt1	0.343356	1.27733e-230		Inhba	0.305209	1.22948e-17		Sept9	0.417392	2.57761e-06		Efna5	0.89063	3.47903e-258						Mmp28	0.477741	5.5808e-87		Arhgap29	0.539327	5.2144e-96						Gjb3	0.253112	5.39746e-70						Fxr1	0.582509	1.15282e-50
Ezh2	0.518472	1.50317e-230		Jarid2	0.929999	1.23694e-17		Cbx3	0.374615	2.66397e-06		Megf9	0.448378	5.9131e-258						Myo1d	0.707835	8.63418e-87		Nlrc5	0.654056	6.1241e-95						Tenm4	0.708933	7.70348e-70						Usp33	0.536309	1.6017e-50
Nasp	0.509911	4.84118e-230		Fam83g	0.438633	1.34086e-17		Arhgap32	0.286646	2.70831e-06		Mctp2	0.4168	6.28669e-258						Ppp4r1	0.700819	9.21086e-87		Dnaja4	0.329686	7.69143e-95						Mark2	0.586132	8.92694e-70						Sos1	0.609688	2.0036e-50
Trp53	0.348253	1.04124e-229		Gpatch2	0.313184	1.3784e-17		Tpi1	0.357651	2.74989e-06		Atox1	0.708367	3.12651e-257						Arl15	0.803824	1.193e-86		Gcat	0.559411	1.90365e-94						Strbp	0.468216	1.05508e-69						Lmbr1l	0.464061	2.16172e-50
Taf3	0.439078	2.98174e-229		S100a6	1.46506	1.41047e-17		Pam	0.250879	3.24822e-06		Ggh	0.578075	3.30335e-257						March5	0.686896	1.99167e-86		Nhsl1	0.967185	3.6443e-94						Acsl1	0.537355	2.65998e-69						Numa1	0.527624	2.48495e-50
Mybbp1a	0.302853	3.62358e-229		Aco1	0.303558	1.44299e-17		Fto	0.320252	3.53871e-06		Cs	0.599652	1.32869e-255						Usp7	0.629152	2.1347e-86		Tmprss4	0.758895	5.80872e-94						Zfp326	0.541814	3.18876e-69						Bbx	0.605971	2.52427e-50
Topors	0.268431	3.33348e-228		Synpo	0.30743	1.44827e-17		Manf	0.316264	3.57868e-06		Plxdc2	0.705144	3.28397e-255						Scyl2	0.582972	2.23129e-86		Slc25a25	0.689487	2.94522e-93						Usp54	0.313374	3.94738e-69						App	0.649215	2.54578e-50
Nfatc3	0.410235	3.66534e-228		Nup205	0.389984	1.61959e-17		Mif	0.325327	3.64646e-06		Parl	0.327897	2.33105e-254						Pip5k1a	0.698584	2.98821e-86		Gpr160	0.330602	3.18967e-93						Ppp1cb	0.589587	4.85288e-69						Ube2q2	0.623542	3.12389e-50
Mink1	0.410919	6.86619e-228		Plekha5	0.944646	2.19436e-17		Taf4b	0.257109	3.77109e-06		Plbd1	0.477948	3.19739e-254						Clasp1	0.976707	4.65235e-86		Clip1	0.737302	1.07391e-92						Ipmk	0.561175	8.41659e-69						Vangl1	0.490182	3.24798e-50
Slc9a1	0.56294	6.86902e-228		Golga1	0.350429	2.21605e-17		Nars2	0.290863	3.86681e-06		Ppm1d	0.36368	9.09004e-254						Dsg1a	0.680623	8.1661e-86		Mfap3l	0.350115	1.41422e-92						Slc41a1	0.314994	1.24103e-68						Tfdp2	0.524918	3.78381e-50
Kank1	0.461644	1.17551e-227		Cav2	0.494801	2.2891e-17		Hmgn1	0.325112	3.87621e-06		Atg14	0.254557	1.07746e-253						G3bp1	0.745189	1.00443e-85		Hr	0.42181	1.9399e-92						Chp1	0.599994	3.69056e-68						Pex14	0.643996	4.07674e-50
Osgin2	0.311629	2.06612e-227		Phf14	0.535085	2.74711e-17		Ube2s	0.360661	4.20583e-06		Rgmb	0.289946	1.96596e-253						Lamc2	0.680323	1.01938e-85		Rdh13	0.263466	2.88256e-92						Top2b	0.564519	4.05359e-68						Cnot4	0.655467	4.23684e-50
Ilf2	0.320387	3.34335e-227		Ddit4	0.358086	2.87914e-17		Hmgb1	0.283047	4.54333e-06		Capn1	0.362033	4.22313e-253						Lrch3	0.831954	1.02536e-85		Gba	0.407838	2.93007e-92						Car13	0.436403	7.69896e-68						Atf7	0.604047	4.44667e-50
Gnl3	0.508922	4.76882e-227		Cpped1	0.287978	3.0266e-17		Akr1b8	0.301687	4.95873e-06		Kif13b	0.797279	4.79565e-253						Scamp1	0.680298	1.37623e-85		Dexi	0.461789	3.74609e-92						Fam102a	0.305593	1.34599e-67						Rdx	0.582283	4.4599e-50
Alkbh1	0.367536	5.19781e-227		Tenm3	0.350889	3.08376e-17		Slc25a24	0.358849	5.01706e-06		Pdcd4	0.460062	1.0072e-252						Ptger4	0.576701	1.73164e-85		Ippk	0.422029	7.6858e-92						Klf5	0.547234	2.43164e-67						Otud7b	0.668671	4.72842e-50
Zfas1	0.456085	6.19802e-227		Ckmt1	0.493765	3.36347e-17		Mthfd1l	0.257539	5.3568e-06		Rnd3	0.631537	1.17929e-252						Papola	0.609028	2.21989e-85		Ormdl2	0.40832	1.30135e-91						Prkch	0.487731	3.95783e-67						Ezh2	0.653921	4.78669e-50
4930523C07Rik	0.520311	9.68364e-227		Ank3	0.631617	3.369e-17		Ncl	0.383148	5.96378e-06		Trp63	0.557036	1.42551e-252						Clk1	0.574278	2.55238e-85		Tspan5	0.96609	3.14382e-91						Map4k3	0.680873	4.93258e-67						Arid4a	0.574275	5.33006e-50
Naa25	0.381845	1.36938e-226		Slx4ip	0.382667	3.5505e-17		Slc43a3	0.30651	6.0889e-06		Atp5d	0.682712	1.63092e-252						Dock9	0.602937	2.55953e-85		Wfdc21	1.21189	4.33068e-91						Mettl17	0.286064	5.66597e-67						Smarcc1	0.558879	6.83238e-50
Cobll1	0.4723	1.67605e-226		Pdss1	0.264987	3.63825e-17		Adgra2	0.310388	6.18176e-06		Ssx2ip	0.262854	4.26249e-251						Stt3b	0.692915	4.2713e-85		Pgrmc2	0.583067	4.54607e-91						Guk1	0.373517	5.94317e-67						Ube2h	0.741095	6.97822e-50
Avpi1	0.539252	1.98254e-226		Ercc6l2	0.26515	3.99023e-17		Ube2e2	0.262253	6.23213e-06		Rps24	0.676972	9.20794e-251						Lrba	0.624458	7.19085e-85		Serpinb5	1.03359	6.71218e-91						Cyp51	0.601217	5.96616e-67						Rnf169	0.559567	1.11566e-49
Pak1ip1	0.294958	7.10284e-226		Dnmt3a	0.614433	4.41068e-17		Ssr2	0.325489	6.26431e-06		Sox6	0.354304	9.49817e-251						Polr3g	0.54289	7.35118e-85		Lad1	0.357667	1.33698e-90						Acox1	0.52405	7.09995e-67						Cse1l	0.590913	1.22046e-49
Ncbp1	0.255381	2.06424e-225		Hsp90b1	0.918714	4.97539e-17		Slc25a4	0.284979	6.53411e-06		Smim13	0.278584	1.26997e-250						Ubac2	0.710004	2.18229e-84		Abhd5	0.651284	1.75161e-90						Clcn3	0.460504	7.63616e-67						Zc2hc1a	0.465324	1.46548e-49
Eif3e	0.569217	2.38758e-225		Slc38a4	0.299588	5.63132e-17		Nme1	0.366025	6.65736e-06		Znrf2	0.682074	2.76166e-250						Foxn3	0.659243	2.5354e-84		Tmem43	0.603379	1.29223e-89						Egr3	0.339278	9.29941e-67						Id1	0.527495	2.8598e-49
Antxr1	0.438543	3.8727e-225		Scmh1	0.596174	6.83166e-17		Ammecr1	0.318602	6.7243e-06		Sema4b	0.401627	4.17651e-250						Abi1	0.533451	3.00892e-84		Sh3rf2	0.545314	1.49776e-89						mt-Co1	0.500982	9.82204e-67						Usp10	0.498901	3.95313e-49
Mtrex	0.31859	4.72916e-225		Cep295	0.307083	7.24502e-17		Eif3a	0.434297	8.16901e-06		St14	0.287693	5.32189e-250						Phip	0.713393	3.58276e-84		Ypel2	0.464305	1.95165e-89						2610035D17Rik	0.704971	1.2479e-66						Celf1	0.560092	4.03483e-49
Clpx	0.441277	6.38662e-225		Cr1l	0.510988	7.384e-17		Surf4	0.277035	9.12495e-06		Scap	0.379886	5.91768e-250						Ttc37	0.616734	3.61767e-84		Atp6v0a2	0.465669	2.87846e-89						Naa15	0.561744	1.71972e-66						Hnrnpr	0.510835	4.34294e-49
Itpr3	0.304579	8.89824e-225		Ppp2r3a	0.795526	7.50877e-17		Chpf	0.285499	9.37481e-06		Plcb3	0.267472	7.72785e-250						Ccnl1	0.630194	4.29838e-84		Tmem159	0.334922	3.40169e-89						Dlg2	0.491199	2.12962e-66						Ephx1	0.340526	4.47499e-49
Arl4a	0.42298	1.21292e-224		Pbx1	0.85775	7.67673e-17		Rrm1	0.41227	1.005e-05		Ide	0.466022	1.40853e-248						Sap130	0.613096	8.17486e-84		Pkp3	0.541098	4.70206e-89						Rgma	0.394687	2.27619e-66						Arhgap35	0.536654	6.04937e-49
Serpinb5	0.519407	1.43161e-224		Tmem260	0.361226	7.71258e-17		Slco2a1	0.372356	1.18438e-05		F11r	0.543341	2.55044e-248						9930021J03Rik	0.663186	8.54869e-84		Ermp1	0.357721	8.09988e-89						Rcor1	0.617253	3.32109e-66						Dcun1d4	0.53697	6.73679e-49
Prmt1	0.281515	1.53881e-224		Spred2	0.714886	7.86174e-17		Prkcsh	0.337367	1.30803e-05		Rplp2	0.617424	3.03362e-248						Ppm1d	0.584741	1.13293e-83		Alox12e	0.63971	1.22867e-88						Btbd10	0.437662	5.48318e-66						Sumo1	0.625292	6.79431e-49
Rpl36al	0.609967	2.24768e-224		Ercc1	0.274326	8.17575e-17		Fgfbp1	0.288618	1.31345e-05		2610528A11Rik	0.607083	4.74924e-248						Gapvd1	0.647418	1.29725e-83		Bnip3l	0.894034	2.32847e-88						Zfp385a	0.352401	6.61027e-66						Map3k3	0.70074	7.26923e-49
Pdlim1	0.329741	3.49668e-224		2610307P16Rik	0.317561	8.22478e-17		Map4	0.308704	1.33228e-05		Ppdpf	0.312289	8.44974e-248						Ankhd1	0.591092	1.56259e-83		Sprr2h	0.43622	4.19782e-88						Rasal2	0.500198	7.34704e-66						Ipo7	0.629063	1.05447e-48
Megf9	0.365749	8.88263e-224		Slc12a4	0.29394	9.20233e-17		Adk	0.281106	1.41084e-05		Zfp266	0.416827	1.87871e-247						Upf2	0.613868	2.46757e-83		Plekha5	0.808555	1.6933e-87						Firre	0.253148	8.09888e-66						Syncrip	0.569221	1.42255e-48
Ankrd11	0.659115	8.89312e-224		Barx2	0.267328	9.62779e-17		Cd164	0.34236	1.49457e-05		Arhgef4	0.310787	2.24742e-246						Tlk2	0.683314	2.85104e-83		Mindy3	0.84859	5.92127e-87						Rhbdl3	0.319182	1.46328e-65						Fam120a	0.544094	1.53018e-48
Crybg1	0.476956	3.78686e-223		Map2k1	0.750109	1.10644e-16		Eif2s2	0.300838	1.70866e-05		Spint2	0.375709	6.69628e-246						Plekha5	0.87717	3.18167e-83		Erbb3	0.424993	1.15306e-86						Pex14	0.507898	3.30075e-65						Shroom2	0.478055	2.05001e-48
Golim4	0.3824	1.23392e-222		Mast4	0.834048	1.18235e-16		Macc1	0.26797	1.70872e-05		Unc45a	0.391933	1.72114e-245						Rad23b	0.579767	5.62563e-83		Aldh3b2	0.272133	1.20037e-86						Dusp6	0.435357	5.69132e-65						Gm37240	0.584552	2.89101e-48
Ctnna1	0.678599	1.60991e-222		Fgd6	0.370433	1.20065e-16		Wipi1	0.315121	1.75348e-05		Vdac1	0.607521	5.9635e-245						Fat1	0.607742	5.9978e-83		Krt1	1.77464	2.02282e-86						Gpr87	0.297422	6.20584e-65						Map3k2	0.776518	2.97312e-48
Trp53inp1	0.349149	2.87868e-222		Rad50	0.356546	1.22094e-16		Cyp51	0.3062	1.80124e-05		Gtf2f2	0.662645	7.13389e-245						Lrch1	0.710955	6.22921e-83		Daam1	0.745937	2.09701e-86						Tecr	0.488136	6.24151e-65						Pptc7	0.542625	3.21452e-48
Ect2	0.433439	1.11657e-221		Fam49b	0.79389	1.35656e-16		Fdft1	0.256995	1.84573e-05		H2afj	0.672154	1.39769e-244						Ppp6r3	0.62266	8.01158e-83		Nectin2	0.512762	2.98411e-86						Efna1	0.250712	7.77177e-65						Smc4	0.636817	3.32846e-48
Snrpf	0.484381	1.1171e-221		Msmo1	0.983487	1.40049e-16		Dock1	0.298531	1.86793e-05		Net1	0.355975	3.83169e-244						Etl4	0.699818	9.33659e-83		Osbpl5	0.336339	6.063e-86						Baz2a	0.491766	8.695e-65						Snrnp70	0.540384	3.4261e-48
Cd9	0.527932	1.414e-221		Ackr3	0.382665	1.51716e-16		Kcnq1ot1	0.379536	1.88765e-05		Slc25a17	0.334783	9.66304e-244						Rbm39	0.52182	1.0506e-82		Kif1c	0.554818	8.57965e-86						Reep4	0.284089	9.16989e-65						Pum2	0.561095	4.15372e-48
Hmgcs1	0.557891	2.86511e-221		Net1	0.553029	1.58177e-16		Bzw1	0.348905	1.94476e-05		Slc6a8	0.363124	1.46008e-243						Hagh	0.495858	1.6537e-82		Pkp1	0.758919	1.77196e-85						Uqcc2	0.44413	9.51945e-65						Smyd3	0.782792	5.20208e-48
Ssh2	0.632749	2.95305e-221		Tmeff1	0.350505	1.70959e-16		Fermt2	0.255653	1.95369e-05		Fbxo9	0.268233	2.06429e-243						Met	0.671434	1.81165e-82		Tecr	0.688051	1.52957e-84						Fdps	0.419034	1.19843e-64						Clasp2	0.725439	6.96994e-48
Mrpl13	0.317538	7.42012e-221		Ext1	1.05756	1.82726e-16		Eif4g1	0.394393	2.33038e-05		Cadm1	0.456278	2.1932e-243						Nckap5	0.871888	2.29057e-82		Acsl1	0.722174	1.91242e-84						Zcchc8	0.317407	1.27775e-64						Ophn1	0.685772	7.48306e-48
Npepps	0.748096	9.41105e-220		Hjurp	0.540894	2.02289e-16		Ddb1	0.3453	2.40301e-05		Cpeb3	0.528546	4.06504e-243						Selenoi	0.596985	3.4499e-82		Zfp800	0.633537	3.87506e-84						Fam57a	0.296213	1.35042e-64						Calm2	0.609743	8.99068e-48
Bmpr1a	0.472756	6.99923e-219		Cast	0.748705	2.04961e-16		Copb1	0.347393	2.44329e-05		Rrn3	0.303548	7.00453e-243						Frs2	0.681254	5.13024e-82		Srgap1	0.391709	2.96583e-83						H2afj	0.557379	1.79784e-64						Arid2	0.547301	1.38616e-47
Scap	0.307823	8.6822e-219		Cit	0.426727	2.06674e-16		Cask	0.261181	2.45546e-05		Rangap1	0.471046	1.29162e-242						Kmt2e	0.646508	5.90545e-82		Tsc22d2	0.907564	6.88172e-83						Phldb3	0.256119	3.11544e-64						Acvr1b	0.499862	1.98233e-47
Rpl24	0.614616	1.02905e-218		Gpsm2	0.383308	2.24375e-16		Lad1	0.333504	2.4595e-05		Eef1d	0.618426	1.36092e-242						Igsf3	0.516538	8.27406e-82		Tead1	0.688749	1.87227e-82						Hadha	0.442858	3.29915e-64						Txnrd3	0.355861	2.25988e-47
Tmem51	0.288649	1.0606e-218		Vegfa	0.774337	2.41101e-16		Ran	0.332402	2.555e-05		Naca	0.662549	2.20615e-242						Nmt2	0.710018	8.976e-82		Celsr2	0.40296	5.75758e-82						Psmd7	0.466657	6.98979e-64						Hnrnpc	0.585573	2.55047e-47
Hnrnpd	0.553167	3.56319e-218		Rusc2	0.34082	2.44293e-16		Pxdc1	0.395745	2.62696e-05		Rpl36a	0.725535	5.06979e-242						Atf6	0.693827	1.16897e-81		Pdzd2	0.63339	1.43608e-81						Mtmr1	0.397213	7.39395e-64						Zbtb20	0.535879	2.67706e-47
Trim29	0.412829	6.53428e-218		Rubcn	0.284544	2.44619e-16		mt-Atp8	0.3731	2.79818e-05		Rps21	0.709787	1.01373e-241						Flnb	0.752472	1.43684e-81		Kif21a	0.613203	3.4154e-81						Camsap1	0.410936	7.50214e-64						Rbm26	0.558654	2.70373e-47
Mt2	0.703452	1.18534e-217		Rab11fip5	0.255576	2.52498e-16		Pkd2	0.2981	2.88634e-05		Eef1g	0.65953	4.49084e-241						Cdh3	0.536882	1.62446e-81		Zdhhc9	0.457831	7.80561e-81						Irx5	0.258281	8.67963e-64						Sltm	0.555131	2.90582e-47
Larp1b	0.429453	1.40492e-217		Ammecr1	0.760251	2.59133e-16		Rps24	0.270064	3.23495e-05		Rpl37a	0.630254	5.23334e-241						Csnk2a2	0.700805	2.47747e-81		Dhrs1	0.411922	1.20717e-80						Chit1	0.464604	9.32244e-64						Zcchc7	0.627515	4.32092e-47
Aqp3	0.555532	4.03163e-217		Gipc1	0.307086	2.62572e-16		Cast	0.29338	3.50931e-05		Papss1	0.405295	1.25908e-240						Hmgcs1	0.56975	2.65381e-81		Sptssa	0.755031	1.28941e-80						Etl4	0.481209	1.1799e-63						Pacs1	0.62757	5.13228e-47
Wls	0.542347	8.76878e-217		Cdca3	0.256793	2.98959e-16		Vdac1	0.29082	4.00435e-05		Ak2	0.478409	1.79622e-240						Ppp2r3a	0.690562	3.48283e-81		Echdc1	0.253286	2.14443e-80						Dstn	0.51062	2.42371e-63						Dip2c	0.64985	5.53062e-47
Gtf3c1	0.275508	9.88523e-217		Micall1	0.566881	3.65435e-16		Itpk1	0.275309	4.46082e-05		Ippk	0.282637	2.68829e-240						B4galt1	0.614359	4.66613e-81		Cbx4	0.42064	9.13436e-80						Bcl9l	0.29399	2.86401e-63						Trp53inp1	0.63173	5.72082e-47
2610528A11Rik	0.452734	1.04632e-216		Ptpn9	0.422062	4.04032e-16		Rbm3	0.310136	4.74526e-05		Slc1a1	0.508004	2.69975e-240						Eppk1	0.673613	5.4475e-81		Cd2ap	0.721804	1.07831e-79						Rmnd5a	0.531639	3.03744e-63						Srsf3	0.526725	5.89559e-47
Rfx7	0.519394	2.44379e-216		Setdb1	0.263919	4.12216e-16		Serpinb6a	0.278558	4.83707e-05		Micu2	0.489597	5.11032e-240						Ascc3	0.66759	8.26836e-81		Mettl17	0.274579	1.46831e-79						Elovl4	0.494694	4.05805e-63						Wac	0.66893	5.9755e-47
Naa15	0.580592	3.11682e-216		Pard3	0.845387	4.12358e-16		Mpp6	0.286718	4.982e-05		Tubb4b	0.703546	1.8208e-239						Epb41	0.57922	1.14912e-80		Dcun1d3	0.486815	2.07252e-79						Prrg4	0.303393	4.2125e-63						Fubp1	0.567125	6.65976e-47
Naa16	0.339212	3.40064e-216		Wipi1	0.383933	4.15787e-16		Kpnb1	0.363169	5.56014e-05		Rpl34	0.711877	2.19734e-238						Kdm5c	0.652131	1.29432e-80		Rnf11	0.781858	2.18256e-79						F2rl1	0.357499	5.39479e-63						Tbl1x	0.683455	6.89054e-47
Pik3cb	0.570225	7.29226e-216		Tango6	0.399303	4.20994e-16		Hspa4	0.316321	5.61654e-05		Pard3	0.71369	1.64307e-237						Scaf8	0.659318	1.47092e-80		Dnajb1	0.758931	2.20772e-79						Bmpr2	0.638017	8.72128e-63						Pafah1b1	0.586463	7.22366e-47
Atp5a1	0.563089	8.44153e-216		Eefsec	0.285731	4.23234e-16		Golim4	0.291362	5.76618e-05		Ubac2	0.552988	6.07248e-237						Ino80	0.639103	1.55106e-80		Epha4	0.848731	3.99092e-79						Endou	0.486381	1.18397e-62						Ankhd1	0.568877	7.5431e-47
Reps1	0.50536	1.19437e-215		Cwh43	0.391579	4.33457e-16		Prrc1	0.343524	5.89741e-05		Grpel2	0.3051	6.4376e-237						Thrap3	0.581658	2.66215e-80		Ezr	0.654912	4.4012e-79						Hagh	0.366548	1.19371e-62						Gphn	0.457473	1.18364e-46
Slc22a23	0.502589	1.49503e-215		Eef2k	0.362652	5.00398e-16		Ncapg2	0.315898	6.59187e-05		Gnai1	0.550406	8.39922e-237						Hmbox1	0.591373	3.26264e-80		Bicd2	0.674469	4.83176e-79						Sqle	0.335099	1.36506e-62						Zfr	0.614207	1.50289e-46
Nedd4l	0.762566	2.03767e-215		Nudt5	0.453686	5.06555e-16		Gm47283	0.279331	6.63539e-05		Eef2	0.70513	1.92485e-236						Osbpl3	0.683027	3.79821e-80		Csnk2a1	0.683006	5.72961e-79						Slc5a1	0.521755	1.41037e-62						Btbd7	0.580041	1.72464e-46
Snx27	0.503986	3.06048e-215		Smarcad1	0.397856	6.2034e-16		Stt3a	0.384449	6.65302e-05		Tpt1	0.590386	1.1253e-235						Rmnd5a	0.653332	3.87093e-80		2310022B05Rik	0.34205	6.83995e-79						Chmp2b	0.402257	1.90375e-62						Scap	0.498824	2.09716e-46
Metap2	0.520954	3.95791e-215		Capn1	0.44388	6.40557e-16		Rpsa	0.251532	6.70562e-05		Ppp1r14b	0.612348	1.15629e-235						Epha2	0.421811	3.87662e-80		Psmd8	0.698931	8.22302e-79						AC149090.1	0.368551	2.32244e-62						Memo1	0.646451	2.16461e-46
Igsf3	0.306208	6.23844e-215		Vcl	0.861615	6.78995e-16		Colgalt1	0.339975	6.99542e-05		Rpl36al	0.653312	1.23173e-235						mt-Nd4l	0.590316	4.7736e-80		Arl5b	0.750793	1.14405e-78						Gpcpd1	0.743755	3.32296e-62						Mbd2	0.57012	2.45229e-46
Wdr47	0.327296	6.56688e-215		Rnf145	0.583745	7.4954e-16		Chsy1	0.276084	7.07939e-05		Skp1a	0.567418	2.62172e-235						Camta1	0.625066	5.05122e-80		Eif5a	0.66102	1.95509e-78						Tmem134	0.40781	3.54274e-62						Pls3	0.807572	2.53156e-46
Larp4	0.538386	1.7823e-214		Slc22a15	0.275845	7.80077e-16		Sec61a1	0.310204	7.5283e-05		Stim1	0.673878	8.32142e-235						Hace1	0.608088	6.5527e-80		Maff	0.411567	4.25936e-78						Msmo1	0.510669	3.72805e-62						Smap1	0.645086	3.15253e-46
G3bp1	0.603357	4.99882e-214		Mgst3	0.475672	7.83372e-16		Capns1	0.318846	7.77641e-05		Epcam	0.308612	1.02243e-234						Plxdc2	1.07311	7.7628e-80		Mpzl2	0.40456	6.8417e-78						Jmy	0.484159	4.9897e-62						Birc6	0.509542	4.97017e-46
Eef1g	0.596285	7.10821e-214		Pkm	0.879743	8.70751e-16		Snrpd2	0.328015	8.5887e-05		Eif3k	0.616344	1.06765e-234						Cse1l	0.554356	9.73608e-80		Golga1	0.258864	9.57901e-78						Nek7	0.6485	6.28331e-62						Dcaf6	0.636746	7.33062e-46
Egfr	0.801225	8.81862e-214		Col12a1	0.409123	8.85709e-16		Eef1b2	0.26169	8.64494e-05		Higd1a	0.724151	4.81914e-234						Tcf20	0.663095	1.19785e-79		Hars	0.389618	1.68496e-77						Epha1	0.265461	7.37418e-62						Aplp2	0.474989	7.63228e-46
Eif4b	0.519749	1.20741e-213		Bok	0.365194	9.04577e-16		Cd276	0.300947	9.5585e-05		Clpx	0.504347	1.51086e-233						Large1	0.791944	1.20841e-79		Hras	0.609693	3.07798e-77						Epha2	0.289561	9.12641e-62						Svil	0.610255	8.24138e-46
Cachd1	0.497993	1.72066e-213		Sipa1l3	0.683788	9.0839e-16		Sdc2	0.291441	9.78546e-05		Car13	0.405674	3.14312e-233						Foxk1	0.519443	1.95693e-79		Ifi30	0.513641	5.87161e-77						Ctif	0.49741	1.89012e-61						Ptk2	0.542049	9.89874e-46
Gm37240	0.277208	2.59794e-213		Dtymk	0.255784	9.38447e-16		Chd9	0.301258	0.00010634		Iffo2	0.464037	4.5704e-233						Jmjd1c	0.607616	2.98982e-79		Bin3	0.356327	9.01195e-77						Slc6a8	0.345018	2.60904e-61						Sgk1	0.537007	1.15075e-45
Pqlc1	0.416309	3.73566e-213		Iars2	0.448326	9.54701e-16		Set	0.331363	0.000115926		Ank	0.257464	4.88337e-233						Dennd4c	0.794839	3.41799e-79		Cln8	0.386447	9.45378e-77						Plcg2	0.371119	2.94217e-61						Afap1l2	0.54788	1.26529e-45
Brix1	0.265153	4.95181e-213		Ext2	0.439059	1.1304e-15		Map3k5	0.437329	0.000152838		Sun1	0.358079	1.31413e-232						Tmtc2	0.749499	3.68201e-79		Dstn	0.666181	1.29074e-76						Tmem238	0.260793	3.22051e-61						Rhbdl3	0.395326	1.35006e-45
B3galnt2	0.291616	7.60662e-213		Anapc4	0.264336	1.2352e-15		Bnip3	0.261001	0.000153886		Taf13	0.28778	9.03192e-232						Gpbp1l1	0.549702	4.01744e-79		Efnb2	0.694946	1.31594e-76						Slain2	0.469779	3.64524e-61						Rbbp4	0.51555	1.85675e-45
Arhgap21	0.567941	8.06095e-213		Btrc	0.338598	1.4734e-15		Rpn2	0.380818	0.000167534		Pdzd2	0.336183	3.41862e-231						Eps15l1	0.572817	5.67447e-79		Sec62	0.788309	1.54683e-76						Dynll1	0.726947	4.31696e-61						Gapvd1	0.53245	1.9092e-45
Ppp2r3a	0.529982	1.49445e-212		Cttn	0.607453	1.50069e-15		Spidr	0.254628	0.000168172		Rpl7a	0.645558	4.57465e-231						Mycbp2	0.574113	6.15974e-79		Mfsd6	0.537746	1.6419e-76						Ralgapa2	0.598999	5.69553e-61						Prxl2a	0.430136	2.28192e-45
Snhg8	0.447804	4.23776e-212		Ptprk	0.35982	1.55787e-15		Moxd1	0.336512	0.000182717		Igsf3	0.327316	1.25731e-230						Tmem65	0.591903	8.49997e-79		Vasn	0.354976	8.42314e-76						Cd109	0.561963	7.51281e-61						Hacd3	0.537031	2.64929e-45
Hnrnpr	0.414124	7.92223e-212		B4galnt1	0.288627	1.63951e-15		Epb41l4a	0.251292	0.000213935		Ech1	0.311751	1.61599e-230						Gxylt1	0.563416	1.06677e-78		Sptlc1	0.340975	1.65801e-75						Cnot6l	0.569392	9.49029e-61						Luc7l2	0.490443	3.36138e-45
Maml3	0.681034	3.22569e-211		Zkscan3	0.399086	1.6896e-15		Nectin1	0.293044	0.00024226		Aggf1	0.411023	3.51232e-230						Mbnl1	0.731045	1.235e-78		Tmem154	0.288347	1.67293e-75						Dcaf1	0.465804	1.17123e-60						Notch1	0.503049	5.32984e-45
Rps21	0.65618	3.35784e-211		Map4	0.764315	1.9446e-15		Rhoq	0.28293	0.000273941		Atg13	0.450086	1.13409e-229						Fut8	0.85327	1.90447e-78		Chmp2b	0.521388	2.08326e-75						Nemf	0.489021	1.30936e-60						Matn2	0.29806	5.858e-45
Iffo2	0.303091	5.69405e-211		Pgam1	0.918203	2.00766e-15		Rassf5	0.357318	0.000274246		Hsp90ab1	0.603903	5.25268e-229						Dyrk1a	0.626033	2.34702e-78		Plk3	0.550272	2.93032e-75						Egfr	0.587455	1.34971e-60						R3hdm1	0.582781	6.63415e-45
Ncor2	0.390834	7.48157e-211		Dip2a	0.398408	2.14719e-15		Igsf8	0.357584	0.000282669		Slc25a25	0.489631	6.84395e-229						Osgin2	0.476058	2.60132e-78		Egfr	0.757289	6.98758e-75						Ube2g1	0.552154	1.56479e-60						mt-Nd5	0.450964	6.78483e-45
Upf3b	0.26168	1.13637e-210		Atp8a1	0.39667	2.21431e-15		Ywhaq	0.342267	0.000361466		Sh3d19	0.656244	7.41765e-229						Snx27	0.67797	2.82894e-78		Rapgef4	0.651591	1.01566e-74						Rhod	0.287915	1.85308e-60						Dcaf1	0.581732	7.68981e-45
Akap8	0.254459	1.17513e-210		Snrk	0.535533	2.49422e-15		Myh9	0.284213	0.000382826		Vps13a	0.563314	8.41009e-229						Fus	0.626957	5.90814e-78		Sar1b	0.689005	1.26744e-74						Ubn2	0.616014	2.98856e-60						Atad2b	0.66402	1.10107e-44
Topbp1	0.307534	1.5966e-210		Capn2	0.679579	2.61442e-15		Serp1	0.258944	0.000393407		Rps28	0.702832	1.53319e-228						Klc1	0.645598	6.26551e-78		Med4	0.368898	1.81381e-74						Lsg1	0.322212	3.10782e-60						Zfc3h1	0.602992	1.46249e-44
Kctd1	0.259376	1.95822e-210		Rcor3	0.466549	2.79496e-15		Mid1	0.253424	0.000398086		Pcyox1	0.355603	2.15621e-228						Tmem131	0.606877	7.30364e-78		Nupr1	0.50366	2.49921e-74						Pou3f1	0.489185	5.02216e-60						Cblb	0.647757	1.71968e-44
Mical3	0.278415	2.86539e-209		Tsnax	0.457846	2.79747e-15		Arhgap5	0.300839	0.000417998		Zdhhc3	0.403552	6.50899e-228						Cab39	0.609727	7.78705e-78		Nrd1	0.884081	4.87748e-74						Ctr9	0.297402	5.26979e-60						Tlk1	0.565639	2.1269e-44
Adss	0.535161	3.98133e-209		Dsp	0.76046	2.89616e-15		Vps54	0.250478	0.000441189		Rab11a	0.605688	8.94223e-228						Map3k9	0.320157	8.88596e-78		Abhd17c	0.372533	5.14554e-74						Ubxn2a	0.272377	6.95555e-60						Tcerg1	0.571571	2.25704e-44
Acsl3	0.307576	5.51259e-209		Pitpnc1	0.417935	2.94715e-15		Serbp1	0.257922	0.000447615		Ap1b1	0.297294	5.79032e-227						Mfsd2a	0.360159	1.0712e-77		Map7	0.558064	1.34461e-73						Plxna2	0.500816	8.573e-60						Fyttd1	0.566686	2.659e-44
Ccdc6	0.433256	6.73616e-209		Slc30a9	0.42945	3.84053e-15		Tmem97	0.355479	0.000482278		Copg2	0.265261	4.80675e-226						Ppm1l	0.624619	1.40263e-77		Itm2b	0.616594	1.59569e-73						Rab3ip	0.319684	8.64442e-60						Csad	0.412251	3.28032e-44
Lrig1	0.33226	7.64223e-209		Mlec	0.516235	4.66712e-15		Tmpo	0.323055	0.000492504		Rps17	0.655877	6.76894e-226						Nop58	0.558793	1.60894e-77		Clcn3	0.572938	1.75459e-73						Nectin2	0.36798	1.0298e-59						6720427I07Rik	0.482151	4.88404e-44
Ppm1g	0.314804	1.06707e-208		Vav2	0.253412	4.84037e-15		Nt5dc2	0.315742	0.000570356		Ndufc1	0.546434	1.11833e-225						Nfia	0.789617	1.83301e-77		Zdhhc5	0.552397	2.70188e-73						Cipc	0.255902	1.17797e-59						Helz	0.533631	6.02071e-44
Tuft1	0.253855	1.80412e-208		Ints6	0.649298	4.94801e-15		Tspan4	0.276584	0.000589471		Bcl7c	0.395212	2.27126e-225						Ncoa6	0.575909	2.83407e-77		Wwc1	0.492911	5.07904e-73						Sos2	0.473675	1.38831e-59						Sik2	0.711225	6.05899e-44
Papss1	0.352586	2.11689e-208		Lnx2	0.447461	5.19523e-15		Tmem167	0.273637	0.000663419		Crybg1	0.510274	4.23271e-225						Bcl2l13	0.527088	4.05556e-77		Ppp1r13l	0.273131	5.50086e-73						Mon1a	0.275889	1.39491e-59						Rcor1	0.594997	9.30593e-44
Nlrc5	0.376767	7.00127e-208		P3h2	0.698272	5.57592e-15		Cttn	0.328761	0.000756861		Atpif1	0.632114	4.7224e-225						Grhl2	0.416668	4.42048e-77		Ubqln1	0.547883	6.2912e-73						Ppm1b	0.50335	1.62189e-59						Fam83b	0.472066	1.20749e-43
Vgll4	0.522271	9.82468e-208		Bnip3	0.72007	6.66893e-15		Tspan9	0.289782	0.000804992		Fau	0.59918	2.41013e-224						Mbip	0.418602	4.49853e-77		Serpinb2	0.953512	9.92625e-73						Arhgap42	0.511281	1.99159e-59						Gtf2ird1	0.477515	1.23057e-43
Efl1	0.322464	1.44591e-207		Iars	0.390601	6.79382e-15		Mmp9	0.595817	0.000885156		Polr1d	0.587236	4.6483e-224						Mtmr3	0.632896	4.60394e-77		Sft2d2	0.342907	1.51877e-72						Oas1f	0.314073	2.33114e-59						Ahdc1	0.403658	1.3057e-43
Pebp1	0.511052	1.00758e-206		Hs6st1	0.311455	6.907e-15		Ost4	0.294027	0.000974425		Tnks1bp1	0.343791	1.2616e-223						Stag2	0.621585	4.91451e-77		Pla2g4f	0.27067	4.44098e-72						Dmkn	0.49734	5.03436e-59						Rbbp8	0.913651	1.4927e-43
Smad1	0.540035	3.21713e-206		Trim44	0.374419	7.2767e-15		Hist1h4d	0.286877	0.00119436		Rps29	0.69531	1.88043e-223						Plaa	0.596883	6.25072e-77		Gnai3	0.62017	9.43523e-72						Akap9	0.518735	5.87505e-59						Otud4	0.535758	2.42735e-43
2410006H16Rik	0.6341	3.4422e-206		Ap4e1	0.324263	7.99049e-15		Hnrnpk	0.252432	0.00136832		Ola1	0.42201	2.75407e-223						Arl8b	0.587733	1.06578e-76		Mfsd14b	0.611044	1.16827e-71						Smagp	0.327133	6.02759e-59						Far1	0.516257	2.54465e-43
Ubr5	0.71328	4.11451e-206		Prim2	0.548408	8.44688e-15		Rgs12	0.344853	0.00156323		Aqp3	0.779464	1.55534e-222						Rnf43	0.403777	1.36771e-76		Il20rb	0.437931	1.25117e-71						Ppargc1b	0.262248	8.57836e-59						Phip	0.635631	2.96563e-43
Dtnb	0.308028	5.92444e-206		Uqcrc1	0.686502	8.69072e-15		Ttc3	0.270746	0.00157546		Eif3i	0.536579	1.94607e-222						Uap1	0.760634	1.38538e-76		Prelid3b	0.375373	1.35424e-71						Kif5b	0.523471	1.02905e-58						Carmil1	0.539491	3.11942e-43
Fut8	0.532227	2.39115e-205		Dph6	0.378855	9.61165e-15		Cnn2	0.307639	0.00162077		Serpinb2	1.19719	3.94079e-222						Ppif	0.52964	1.55666e-76		Tmcc3	0.538994	2.08805e-71						Lrp5	0.320557	1.10973e-58						Kdm3b	0.514157	4.39091e-43
Ppp3ca	0.688453	5.92538e-205		Ptgfrn	0.515782	9.78647e-15		Anxa2	0.268434	0.00187069		Gm11808	0.461474	1.19079e-221						Sf3b3	0.577461	1.60895e-76		Ube2e2	0.626404	3.35171e-71						Nmt2	0.567209	1.21866e-58						Ppp2r5e	0.550615	7.19281e-43
Larp1	0.52334	1.3079e-204		Tfap2c	0.468016	9.95671e-15		Llph	0.2601	0.0021753		Zfp706	0.503213	1.29193e-221						Ogt	0.563979	1.97725e-76		Atg101	0.290012	5.69871e-71						Psen1	0.523143	1.40293e-58						Mob2	0.513686	9.23137e-43
Ddx21	0.409516	1.85262e-204		Ppp1r13l	0.292839	1.02183e-14		Cyp20a1	0.287796	0.00218068		Epb41l4a	0.310453	7.92264e-221						Tmem131l	0.622416	2.2731e-76		Wipf2	0.531905	1.6931e-70						Mon2	0.646402	1.62476e-58						Ythdc1	0.633671	9.9466e-43
Vdac1	0.460484	4.7793e-204		Ckap5	0.713415	1.11184e-14		Plod3	0.272953	0.00238741		Srpk2	0.7151	1.45052e-220						Amotl1	0.555046	2.30082e-76		Ube2n	0.648021	1.79938e-70						Acad9	0.314179	1.7002e-58						Rbm39	0.439654	1.01797e-42
Trim33	0.537553	1.97826e-203		Sprr2a3	0.27818	1.12373e-14		Ppa1	0.294032	0.0025384		Rpl35	0.79818	3.84031e-220						Ppp4r3a	0.570524	2.30171e-76		Nfe2l1	0.614727	3.45226e-70						Actn4	0.532691	2.00414e-58						Prkci	0.460171	1.48535e-42
Rab40c	0.383479	2.31116e-203		Prdm10	0.572913	1.2607e-14		Serinc2	0.280703	0.00271576		Zdhhc5	0.422503	7.93613e-220						Mib1	0.635635	2.33647e-76		Zdhhc13	0.31588	5.0274e-70						Efna5	0.459426	2.49653e-58						Mtf2	0.493002	1.67623e-42
Slc20a2	0.362183	2.72345e-203		Trmt6	0.278495	1.27451e-14		Kif5b	0.281899	0.00293503		Crip2	0.513203	2.08975e-219						Cs	0.588076	3.7819e-76		Map2k4	0.746118	1.38475e-69						Il17rc	0.297662	2.90272e-58						Nek7	0.6902	2.0979e-42
Rpl34	0.667589	3.42307e-203		Rrm1	0.508724	1.45268e-14		Sar1a	0.284839	0.00298184		Acly	0.402455	2.29448e-219						Ddx10	0.620914	6.17035e-76		Qsox1	0.532081	2.82821e-69						Hsp90ab1	0.488946	3.81483e-58						Pcbp3	0.544787	2.44692e-42
Emg1	0.281902	5.42302e-203		Efna5	1.05177	1.65154e-14		Polr2f	0.324623	0.0030959		Polb	0.552927	4.59876e-219						Sh3rf1	0.75803	6.76072e-76		Cyb5r4	0.385942	3.63039e-69						Rnd3	0.403484	4.42128e-58						Gm47167	0.41115	2.7387e-42
Sprr2a3	0.568037	7.42206e-203		Cdk1	0.352698	1.67049e-14		Zfp532	0.263732	0.00313535		Dip2b	0.701911	3.02748e-218						Myh14	0.389738	7.05297e-76		Itsn2	0.756903	4.74879e-69						Cdkn2b	0.25125	7.55478e-58						Ptcd3	0.417263	3.15393e-42
Hells	0.33972	8.6152e-203		F11r	0.64487	1.78967e-14		Kdelr1	0.341209	0.00331126		Chmp1b	0.288355	4.90801e-217						Supt6	0.532151	8.98895e-76		Pkib	0.309547	9.64472e-69						Lrba	0.443833	7.62363e-58						Ajuba	0.320647	3.26783e-42
Pkp1	0.427409	2.54183e-202		Galnt1	0.766497	1.85879e-14		Hk2	0.251179	0.00359095		Eif6	0.530818	7.6972e-217						Acer3	0.93811	9.41503e-76		Spint2	0.416078	4.92527e-68						Zxdc	0.261568	7.90294e-58						Usp31	0.476276	4.05956e-42
Sae1	0.320646	4.4608e-202		Lss	0.453726	2.13188e-14		Copb2	0.297049	0.00372992		Elovl1	0.30042	8.63102e-217						Birc6	0.604678	1.06694e-75		S100a16	0.549338	5.23148e-68						Serpinb8	0.516183	7.93912e-58						Actn4	0.525381	1.07482e-41
Dpm1	0.503111	4.91964e-202		Spg7	0.317679	2.15816e-14		Arf4	0.296195	0.00424337		Il6ra	0.414547	9.90041e-217						Atxn7	0.626402	1.52874e-75		Mctp2	0.430187	7.90812e-68						Ppif	0.491905	8.18724e-58						Adarb1	0.648129	1.65486e-41
Gm14164	0.258889	8.66761e-202		Mcm4	0.330601	2.27731e-14		Hnrnpu	0.298789	0.00433583		Nectin2	0.358332	3.17908e-216						Znrf2	0.651621	1.61722e-75		Ppm1d	0.361981	1.04504e-67						Trim16	0.294428	8.7165e-58						Ubp1	0.530736	1.99419e-41
Dnm1l	0.367681	1.11666e-201		Slc35a3	0.386531	2.29396e-14		Ddx21	0.343069	0.00434393		Naa15	0.628965	5.4277e-216						4932438A13Rik	0.679086	1.69626e-75		Afdn	0.542226	2.75307e-67						Top1	0.59957	9.01718e-58						Btaf1	0.596845	2.2887e-41
Ror1	0.519951	1.49832e-201		Bcl9l	0.375287	2.47047e-14		Arl6ip1	0.292902	0.00481071		Rpl35a	0.599804	7.45736e-216						Ncoa1	0.669222	1.70862e-75		Prdx2	0.665122	3.99912e-67						Emc8	0.29807	9.02454e-58						Suco	0.479482	2.82718e-41
Riok1	0.375438	2.31752e-201		Txndc17	1.00464	2.67763e-14		Afap1	0.322666	0.00633506		Rnpepl1	0.266437	1.3439e-215						Col7a1	0.411582	1.86157e-75		Cdh1	0.660843	4.27684e-67						Man1a2	0.477494	9.5425e-58						Sh3pxd2a	0.550586	3.03083e-41
Luc7l3	0.5532	5.80477e-201		Smim15	0.304743	2.7747e-14		Gpc1	0.296916	0.0067897		Utp14a	0.26632	6.27181e-215						Ap1g1	0.561363	2.66855e-75		H60c	0.251836	6.28628e-67						Senp2	0.597157	1.0425e-57						Myh14	0.543692	3.16015e-41
Mrpl23	0.302939	9.95734e-201		Wls	0.715809	2.84594e-14		Txndc17	0.252646	0.0072667		Blmh	0.446616	6.95101e-215						Ammecr1l	0.538787	3.01968e-75		Prkch	0.566877	8.43557e-67						Ktn1	0.48312	1.71791e-57						Top2b	0.446248	4.28954e-41
Zfyve9	0.417389	1.10059e-200		Rab31	0.646976	3.12095e-14		Morc2a	0.27698	0.00895687		Chl1	0.471236	1.07762e-214						Foxj3	0.634351	3.11046e-75		Ppp1r13b	0.352715	1.06808e-66						4833439L19Rik	0.379586	1.87811e-57						Lifr	0.60327	5.18241e-41
Cse1l	0.335222	2.25918e-200		Tipin	0.340482	3.16938e-14		Uso1	0.314671	0.0105864		Mbp	0.275062	1.08981e-214						Atxn2	0.666511	3.55299e-75		Slc35e4	0.417952	1.93051e-66						Rasa1	0.5349	1.99221e-57						Tjp2	0.689476	5.28267e-41
Slmap	0.61567	9.84183e-200		Shb	0.44225	3.33371e-14		Iffo2	0.259857	0.010792		Larp1b	0.376885	1.15141e-214						Mrtfa	0.581715	5.3664e-75		Calm1	0.612163	5.03079e-66						Fam43a	0.279206	2.33736e-57						1600010M07Rik	0.477954	5.32842e-41
Nucks1	0.550362	2.73544e-199		Gmnn	0.286776	3.4082e-14		Cfdp1	0.277833	0.0113657		Rab40c	0.390833	6.28418e-214						Gm15283	0.74373	7.33405e-75		Chmp4c	0.407165	6.30975e-66						Klf3	0.493255	2.80467e-57						Lrba	0.56317	5.95812e-41
Chd6	0.402313	2.96165e-199		1700025G04Rik	0.723954	3.46943e-14		Ctdspl	0.298676	0.0129119		Polr2f	0.395229	8.83459e-214						Lama3	0.449792	8.54858e-75		Sept8	0.387549	8.21678e-66						Cat	0.357232	4.86551e-57						Maco1	0.503876	7.33267e-41
Tanc1	0.476693	5.3043e-199		Utp14b	0.304222	3.77801e-14		Ryk	0.281018	0.0138622		Palmd	0.251234	2.01035e-213						Nemf	0.646029	8.96868e-75		Ndel1	0.604592	3.00014e-65						Ier2	0.492618	5.62824e-57						Clock	0.610477	9.12659e-41
Atpif1	0.558926	6.08512e-199		Cdh13	0.548415	3.83004e-14		Got2	0.30136	0.0143228		Acaca	0.50664	2.84084e-213						Evpl	0.464913	9.16585e-75		Fuca1	0.501138	3.14284e-65						Nfatc2	0.32977	1.14528e-56						Bdp1	0.520531	9.8577e-41
Slc25a17	0.268619	6.69735e-199		Ryk	0.571183	3.87264e-14		Slc39a1	0.325787	0.0236868		Rnh1	0.546227	3.10118e-213						Taf1d	0.526585	1.06507e-74		Atp5d	0.603859	3.66747e-65						Tiam1	0.429536	1.27202e-56						Plekha5	0.525646	1.00124e-40
Ptprg	0.470376	3.48193e-198		Cstdc5	1.00546	3.88467e-14		Sdhc	0.326907	0.0270855		Rab18	0.492222	3.8414e-213						Ptbp3	0.576138	1.23528e-74		Arhgap17	0.890696	5.21049e-65						Kctd3	0.272726	1.34965e-56						Ehbp1	0.53959	1.05447e-40
Daam1	0.580546	4.23528e-198		Ylpm1	0.464605	4.24446e-14		Pdgfa	0.258462	0.0290397		Hmgcr	0.390016	3.45516e-212						Csnk1g1	0.622189	1.71628e-74		Nipal2	0.383542	8.39494e-65						Mob2	0.413572	1.4177e-56						Fam193a	0.568566	1.0675e-40
Atl2	0.448399	8.16366e-198		S100a14	0.701837	4.38956e-14		Ero1l	0.250887	0.0310982		Hacd2	0.491438	2.13839e-211						Scap	0.51093	2.14172e-74		Lmtk2	0.407753	1.14768e-64						Mcc	0.547787	1.48043e-56						Scaf11	0.463367	1.28571e-40
L3mbtl3	0.361537	9.87585e-198		Snapc3	0.356929	4.89227e-14		Swi5	0.274869	0.0330231		Camsap1	0.323833	9.50133e-211						Mtmr10	0.613155	2.28874e-74		Rab11a	0.569523	2.87774e-64						Cyb561	0.262719	1.72486e-56						Abtb2	0.75727	1.30654e-40
Ipo7	0.498424	1.06223e-197		Nxn	0.740727	5.21711e-14		Tram1	0.275938	0.0339622		Tmem159	0.270416	2.80987e-210						Rptor	0.548143	2.76281e-74		Pld3	0.429661	3.20238e-64						Flnb	0.637484	2.30784e-56						Map2k4	0.580005	1.64943e-40
Nfx1	0.341084	2.525e-197		Ect2	0.419258	5.64157e-14		Pfkl	0.302703	0.0352089		Ei24	0.284307	4.1618e-210						Fmr1	0.676683	3.3321e-74		Chmp2a	0.51968	3.78082e-64						Ptpra	0.588505	3.10898e-56						Zfp36l2	0.544161	1.75256e-40
Ktn1	0.523409	4.72921e-197		Dsc3	0.758901	5.79731e-14		Arcn1	0.30356	0.0361844		Myo18a	0.435587	2.04096e-209						Shroom4	0.699766	3.76975e-74		Slco3a1	0.636884	6.23723e-64						Tspan8	0.407363	3.31382e-56						Ncs1	0.352059	1.85342e-40
Erh	0.271121	5.86299e-197		Yeats2	0.37868	5.95857e-14		Eny2	0.287885	0.0454882		Slc25a5	0.55375	1.50952e-207						Ankrd13c	0.576544	3.92866e-74		Polb	0.515825	7.45312e-64						Ppp1r37	0.329562	3.52137e-56						Srsf10	0.47178	1.88435e-40
Nudt21	0.262918	7.47594e-197		Copg1	0.327537	6.4668e-14		Atp2c1	0.25478	0.0507948		Sf3b6	0.48919	1.56057e-207						Crebbp	0.558814	4.61472e-74		Dbnl	0.443928	7.85707e-64						Zfp410	0.304701	3.56412e-56						Ror1	0.842276	1.95047e-40
Got2	0.314777	7.81065e-197		Tmem131l	0.670246	7.62552e-14		Tbrg1	0.265004	0.0534876		Clip1	0.598509	5.94009e-207						Dpm1	0.598109	7.08589e-74		Fosb	0.531957	8.39368e-64						Desi1	0.34126	4.36942e-56						Prrc2b	0.552683	1.95858e-40
Vcl	0.704511	1.06205e-196		Lxn	0.267399	7.78737e-14		Rad23b	0.268381	0.0609452		Retreg3	0.387425	9.3691e-207						Relch	0.649857	9.17124e-74		Pmm1	0.263006	8.98213e-64						Hmgcs1	0.614075	4.51687e-56						Zranb1	0.552284	2.03659e-40
Enah	0.54838	9.90732e-196		Shprh	0.287785	8.4134e-14		Cnpy2	0.260393	0.072513		Ywhaz	0.554669	1.48399e-206						Btbd3	0.520519	9.39987e-74		Zbtb43	0.257243	1.14268e-63						Bag4	0.300201	4.8625e-56						Hnrnpd	0.451011	2.0428e-40
Eef1d	0.495888	1.0572e-195		Tacc2	0.616237	8.84699e-14		Erlec1	0.30116	0.0853207		Phlda3	0.288676	5.79501e-206						Fryl	0.53794	1.03658e-73		Sh3gl1	0.367457	1.71996e-63						Csnk1a1	0.544913	6.40327e-56						Ilf3	0.506187	2.09783e-40
F11r	0.36334	1.53217e-195		Slc20a2	0.540858	9.11001e-14		Yipf5	0.301685	0.0933793		Pmvk	0.25218	6.20755e-206						Usp9x	0.65086	1.04231e-73		Noct	0.577519	2.23653e-63						Unc45a	0.344068	9.39785e-56						Dyrk1a	0.515788	2.88614e-40
Bcl7c	0.315098	1.54569e-195		Plekhb2	0.504789	9.47927e-14		Phlda3	0.261517	0.101693		Mark4	0.383383	9.07819e-206						D16Ertd472e	0.523517	1.19449e-73		Reep3	0.568047	5.3783e-63						Zfp598	0.26127	1.01819e-55						Smarca2	0.572103	3.04367e-40
Ndufa12	0.335652	1.90526e-195		Cbfa2t2	0.46993	1.11951e-13		Egln1	0.321997	0.114155		Bcl2l13	0.290165	2.14303e-205						Aff1	0.809107	2.14951e-73		Ptpn14	0.416124	5.78933e-63						A930015D03Rik	0.322811	1.03386e-55						Fry	0.821156	3.98503e-40
Efnb1	0.261988	2.0346e-195		Fam78b	0.327358	1.14783e-13		Pdia4	0.284409	0.156085		Sdc1	0.571559	2.37601e-205						Sema5a	1.22443	3.203e-73		Abca5	0.514624	9.08844e-63						Golga4	0.504471	1.03848e-55						Rasa1	0.513215	8.26487e-40
Fdft1	0.330054	2.04356e-195		Higd1a	0.82795	1.28212e-13		Pdap1	0.273199	0.190954		Acsl5	0.305911	4.46762e-205						Wasf2	0.579823	3.38375e-73		Mprip	0.489846	1.1516e-62						Epb41	0.438748	1.25408e-55						Mllt3	0.73862	8.88841e-40
Rpl31	0.597949	2.13378e-195		Map3k4	0.348145	1.31945e-13		Tsn	0.294369	0.201877		Sowahc	0.381704	5.49089e-205						Cd109	0.575877	4.4554e-73		H2afj	0.571981	1.18156e-62						Dnase1l3	0.373415	1.32554e-55						Nemf	0.539533	1.04322e-39
Tex10	0.282301	5.98554e-195		Tpm1	0.737192	1.43279e-13		Tmf1	0.312679	0.378931		Eif3f	0.59746	1.56847e-204						Gpr107	0.550346	6.6139e-73		Peli1	0.661506	2.24304e-62						Arhgef12	0.428235	1.39757e-55						Mib1	0.549332	1.09668e-39
Tfdp2	0.255802	9.416e-195		Dars	0.371921	1.43663e-13		Tceal9	0.250641	0.447111		Cobll1	0.362481	1.71852e-204						Crim1	0.810115	6.96981e-73		Tom1	0.390897	2.32456e-62						Plekha1	0.492226	4.2584e-55						Larp1b	0.62421	1.16004e-39
Ggct	0.388979	8.43551e-194		Nfia	0.951883	1.5393e-13		Sf3b5	0.286286	0.588504		Galnt7	0.382016	1.78927e-204						Kdm2a	0.560901	7.15588e-73		Map3k20	0.590969	3.73465e-62						Cwh43	0.270175	6.04261e-55						Wdr47	0.578853	1.39352e-39
Ctnnd1	0.611425	1.63831e-193		Kif11	0.558928	1.54885e-13		Nono	0.269404	0.737103		Arhgef11	0.543408	1.82118e-204						Gsk3b	0.636319	1.21654e-72		Spryd7	0.287691	5.2868e-62						Retreg3	0.388704	7.09979e-55						Mbtd1	0.625556	1.54632e-39
Ivns1abp	0.475437	1.82383e-193		Spin1	0.497359	1.58546e-13		Snrpd1	0.280964	0.834395		Pawr	0.392237	9.54837e-204						Zfc3h1	0.71268	1.29691e-72		Spire1	0.579831	8.78616e-62						Limk2	0.286568	8.44285e-55						Scaf4	0.50135	1.57674e-39
Mdh1	0.323329	2.88179e-193		Slc16a1	0.500675	1.67249e-13		Efnb1	0.282749	0.917511		Hmg20b	0.338847	1.98076e-203						Rps6kb1	0.577373	1.58099e-72		Psmc5	0.459611	1.13705e-61						Huwe1	0.566165	9.13708e-55						Hivep2	0.740745	1.76481e-39
Dcaf1	0.313638	2.94697e-193		Ltb4r1	0.339584	1.67721e-13						Cdyl	0.595354	6.08949e-203						Rbm6	0.589826	1.68007e-72		Fam83b	0.483814	1.58256e-61						Fryl	0.468187	1.13868e-54						Trpm7	0.555584	1.80464e-39
Snrpd3	0.297967	2.95584e-193		3830406C13Rik	0.378332	1.67764e-13						Btf3	0.577683	9.99241e-203						Map4k3	0.53676	1.75708e-72		Phactr4	0.568283	2.5581e-61						Slc25a5	0.488755	1.35764e-54						Reps1	0.627052	2.03969e-39
Polk	0.307054	3.34152e-193		Elk3	0.468925	1.68888e-13						Llph	0.454745	2.56849e-202						Nfix	0.565037	2.90246e-72		Pon2	0.598576	2.89681e-61						Eif1ad	0.297533	1.36743e-54						Swt1	0.472697	2.46295e-39
Rnf145	0.337125	3.77592e-193		Nf2	0.394277	1.90584e-13						Dgka	0.311729	3.75268e-202						Vps37b	0.391017	3.2585e-72		Cxadr	0.384328	3.43191e-61						Dennd2c	0.298687	1.92285e-54						Dennd1a	0.568282	2.5322e-39
Sumo1	0.592322	2.45438e-192		Eno1	0.806169	1.92249e-13						Ebp	0.264778	3.89919e-202						Btbd10	0.62493	4.21552e-72		Arap2	0.44908	5.13918e-61						Usp3	0.579799	1.97358e-54						Cdc42bpg	0.311415	2.64349e-39
Prpf8	0.287057	2.59034e-192		Orc5	0.255749	2.02766e-13						Hace1	0.346203	8.27376e-202						Sesn2	0.499213	4.84314e-72		Ranbp10	0.428485	5.23291e-61						Calm2	0.604934	2.30036e-54						Hnrnpu	0.428804	3.17893e-39
Usp53	0.333814	2.62268e-192		Antxr2	0.330244	2.03749e-13						Top2b	0.621402	1.02285e-201						Hectd1	0.456242	6.57669e-72		Fry	0.405835	1.06591e-60						Ormdl3	0.323023	2.50616e-54						Sesn1	0.585146	3.19376e-39
Bclaf1	0.582542	3.14357e-192		Spcs3	0.36593	2.11466e-13						Slc30a4	0.331853	1.15805e-201						Atrnl1	0.599318	6.93981e-72		Rab24	0.343221	1.86187e-60						Ppp2r5e	0.491402	2.9541e-54						5330438D12Rik	0.627509	3.30201e-39
Capn1	0.253041	1.00303e-191		Hmmr	0.386387	2.29037e-13						Csnk1a1	0.570345	3.12501e-201						Grpel2	0.453418	7.03286e-72		Pfdn1	0.4269	2.12871e-60						Relch	0.490917	3.50522e-54						Glce	0.460534	4.09841e-39
Fkbp4	0.287552	1.34751e-191		Urah	0.634972	2.8065e-13						Fam114a2	0.32943	3.3877e-201						Adgrl2	0.921813	7.47916e-72		Tuba1a	0.374039	2.79611e-60						Znrf2	0.447858	8.10191e-54						Paip1	0.512621	4.25112e-39
Lima1	0.496566	4.29699e-191		Mapk6	0.74406	3.06651e-13						Egfr	0.728818	3.83429e-200						Sh3pxd2a	0.553008	8.47776e-72		Ptpn3	0.389218	8.05913e-60						Gtf2f2	0.460358	8.61494e-54						Uri1	0.479161	4.52534e-39
Wdr36	0.28561	8.12485e-191		Knl1	0.479983	3.09088e-13						Phtf2	0.438483	6.79307e-200						Rev3l	0.7783	8.51922e-72		Pard6g	0.428315	9.27533e-60						Rab22a	0.50003	1.30484e-53						Srsf11	0.474833	4.69383e-39
Tanc2	0.528138	1.41503e-190		Acvr1	0.722401	3.19104e-13						Sars	0.325764	1.32377e-199						Trip11	0.54228	9.68954e-72		Zfp266	0.420189	9.33666e-60						Sulf2	0.263134	1.35573e-53						Foxn3	0.536548	4.93693e-39
Arpp19	0.449282	2.12384e-190		Trim8	0.299545	3.47249e-13						Ptma	0.53319	1.53586e-199						Exoc5	0.606213	1.09816e-71		Hbegf	0.56587	5.82063e-59						Tab3	0.296324	1.52015e-53						Sinhcaf	0.39391	5.08772e-39
Galnt18	0.36229	8.73359e-190		Ubash3b	0.603509	3.61254e-13						Ndufa12	0.34773	9.15784e-199						Elf1	0.639316	1.11898e-71		Leprotl1	0.36053	8.10366e-59						Pim3	0.366766	2.08295e-53						Unkl	0.360201	5.23747e-39
Lnpep	0.611888	1.0183e-189		Arhgef1	0.453801	3.62836e-13						Mink1	0.315226	1.92047e-198						Eif5b	0.522801	2.09809e-71		Fam234a	0.394501	8.72361e-59						Ube2h	0.619478	2.21701e-53						Micu3	0.503224	5.44771e-39
Itpr2	0.484885	1.15594e-189		Ngf	0.384689	3.63158e-13						Sgms1	0.771088	3.22171e-198						Bicd2	0.567329	2.22349e-71		Rars	0.346274	1.17733e-58						Tmem65	0.451669	3.26762e-53						Tead1	0.629046	5.65262e-39
Nup153	0.443222	1.33901e-189		Slc39a6	0.451596	3.63855e-13						Slc39a6	0.348234	1.94257e-197						Mia2	0.587392	2.32308e-71		Glrx2	0.356159	3.87288e-58						Atp8b1	0.352367	3.33049e-53						Tab3	0.45333	6.07653e-39
Magi1	0.306525	2.34829e-189		Cdc20	0.298359	4.04031e-13						Neo1	0.323197	2.00415e-197						Tprg	0.974955	2.33668e-71		Pex13	0.348018	4.84291e-58						Amotl1	0.420572	3.37951e-53						Akap9	0.454251	7.05137e-39
Rrm1	0.373818	4.65257e-189		Tax1bp3	0.42938	4.42825e-13						Pa2g4	0.347703	3.59401e-197						Baz1a	0.658809	2.53172e-71		Abcd3	0.498817	5.05561e-58						Mboat2	0.617409	5.87888e-53						Pitpnm2	0.280714	7.19327e-39
Anp32b	0.540324	5.46601e-189		Gon4l	0.283823	4.73415e-13						Gsto1	0.336965	2.63477e-196						Pkn2	0.553945	6.1929e-71		Ptprf	0.565454	5.69334e-58						Acadm	0.301416	5.89841e-53						Ecpas	0.560225	7.23746e-39
Smc3	0.383361	5.65723e-189		Tnfrsf12a	0.524047	4.90409e-13						Rpl41	0.559644	6.27049e-196						Rras2	0.691667	6.53364e-71		Dock9	0.315286	6.78261e-58						Cnksr3	0.329063	6.36688e-53						Mdn1	0.472235	8.07103e-39
Cdyl	0.427156	9.36037e-189		Calu	0.718576	5.24924e-13						Psmc5	0.318337	1.03655e-195						Ddx46	0.53188	6.86704e-71		Tmem50b	0.262743	6.79294e-58						Zdhhc3	0.416449	9.68829e-53						Med13	0.555086	8.95672e-39
Cnot6l	0.559716	9.86847e-189		Dazap1	0.430562	5.29952e-13						Tmem134	0.380764	1.05856e-195						Epcam	0.366197	7.47753e-71		Fasn	0.276173	9.88972e-58						Pgrmc2	0.337064	1.02147e-52						Ino80	0.545192	8.98057e-39
Skp1a	0.450111	1.4432e-188		Heatr5a	0.545362	5.5699e-13						Kank1	0.287352	3.59692e-195						Csnk1d	0.539687	8.70275e-71		Myo18a	0.543232	1.29562e-57						Rps15	0.529322	1.70772e-52						Aqp3	0.364107	9.57109e-39
Eif2s2	0.51693	2.57859e-188		Rnf214	0.271336	5.67125e-13						Mdh1	0.326569	4.09797e-195						Neat1	0.648459	9.10621e-71		1110008P14Rik	0.414919	1.51261e-57						Pum1	0.566754	2.04028e-52						Prpf4b	0.474998	9.84008e-39
Uba2	0.30474	2.70219e-188		Cnot7	0.288559	5.67428e-13						Il13ra1	0.61913	8.83714e-195						Tom1l2	0.790955	2.05131e-70		Amotl1	0.403113	1.69957e-57						Mink1	0.292761	2.29619e-52						Shroom3	0.518201	1.55056e-38
Kazn	0.269519	2.99588e-188		Parva	0.466237	5.71488e-13						Cdcp1	0.28182	2.81323e-194						Spata5	0.620171	2.32562e-70		Urah	0.46008	1.94095e-57						Idi1	0.504949	2.29881e-52						Kdm1a	0.508016	1.65379e-38
Tent5a	0.434426	3.51685e-188		Cav1	0.594699	5.90417e-13						Tmem41b	0.256588	3.40971e-194						Tet2	0.555504	3.06515e-70		Lmbrd2	0.429229	2.15897e-57						Capn1	0.267814	2.64888e-52						Taf15	0.479984	1.67136e-38
Nsa2	0.499631	3.88781e-188		Sept9	0.651344	6.4059e-13						Ndufa10	0.325023	7.20958e-194						Wnt4	0.414609	3.93545e-70		Npl	0.312336	2.33583e-57						Fkbp4	0.293366	2.66314e-52						Ripk4	0.36193	2.22726e-38
Thrb	0.486621	1.08996e-187		Incenp	0.404298	6.46103e-13						Rpl9-ps6	0.320429	1.58081e-193						Osbpl8	0.517985	4.73066e-70		Shb	0.366935	2.7389e-57						Adamts1	0.595599	2.91214e-52						Zbtb11	0.52924	3.14934e-38
Xpo7	0.405181	2.20562e-187		Bcr	0.410333	6.70417e-13						Vps36	0.308063	1.38984e-191						Mdn1	0.448845	4.84554e-70		Dusp7	0.393048	4.72697e-57						Cdk19	0.464154	4.44255e-52						Eed	0.466375	3.70643e-38
Nol7	0.309682	4.96733e-187		Ube2c	0.630457	6.99638e-13						Gk	0.563164	1.18905e-190						Rgmb	0.470346	1.27686e-69		Arfgap2	0.31287	5.83071e-57						Atg2b	0.338509	4.61717e-52						Sf3b3	0.457655	4.08554e-38
Mctp2	0.252802	7.50295e-187		Elp4	0.294511	7.42305e-13						Ezr	0.498992	1.70219e-190						Vkorc1l1	0.601952	1.39421e-69		Xpnpep1	0.497966	7.15987e-57						Ppfia1	0.419582	4.91837e-52						Itpr2	0.599599	4.65411e-38
Ahnak2	0.367897	8.83884e-187		Mbnl2	0.608815	7.44715e-13						Stfa3	1.14041	3.52239e-190						Naa50	0.561707	1.48529e-69		Ckb	0.459449	8.05168e-57						Ptp4a2	0.623309	5.22872e-52						Wapl	0.511122	5.13743e-38
Eif3f	0.541055	1.4327e-186		Uevld	0.254867	7.48293e-13						Akirin1	0.549504	9.03092e-190						Brwd3	0.575746	2.59643e-69		Adipor2	0.499667	1.07536e-56						Smim13	0.253122	6.30724e-52						Extl3	0.473953	6.24259e-38
Snrk	0.313848	6.24664e-186		Hells	0.461973	7.50667e-13						Cstdc5	0.897902	1.01219e-189						Pcgf5	0.764916	3.6229e-69		Zfand6	0.907549	1.28202e-56						Kdm4c	0.46935	6.71694e-52						Ivns1abp	0.481592	6.24499e-38
Ilf3	0.340749	3.21258e-185		Macrod2	0.938251	7.87897e-13						Phactr2	0.704646	1.29187e-188						Snrk	0.542147	4.28328e-69		Apoc1	0.504684	1.36662e-56						Acaa2	0.307525	7.94558e-52						Arhgef37	0.405067	6.95045e-38
Wwtr1	0.58779	3.97239e-185		Krt17	0.653773	8.06818e-13						Tom1l2	0.523831	3.77337e-188						St5	0.695243	4.58289e-69		Trmt10a	0.265541	1.52015e-56						Rfx7	0.483275	8.12735e-52						Gpbp1l1	0.460237	7.09937e-38
Gm11808	0.362251	7.53669e-185		Sh3bgrl2	0.25893	8.12255e-13						Mafb	0.399413	1.18661e-187						Kcmf1	0.538452	5.23431e-69		Lrrc1	0.552474	2.07422e-56						Ube2v2	0.266458	8.21843e-52						Phlpp2	0.389109	7.73188e-38
Atp1b3	0.568493	1.16664e-184		Gtf2ird1	0.497451	8.21341e-13						Rpl10	0.600118	2.18511e-187						Rreb1	0.575347	5.64457e-69		Cnksr3	0.360574	3.88926e-56						Arhgef4	0.474851	1.19881e-51						Ston1	0.311418	8.34412e-38
Phtf2	0.436479	1.42213e-184		Sqle	0.413271	8.56639e-13						Nckap1	0.566452	2.67529e-187						Nfib	0.498979	6.3696e-69		Mid1ip1	0.259723	4.23954e-56						Srpk1	0.35903	1.23794e-51						Csnk1g1	0.504903	8.44161e-38
Rpl37a	0.546714	2.14925e-184		Mctp2	0.365603	9.69936e-13						Rpl22l1	0.638105	1.10239e-186						Ivns1abp	0.533596	6.86613e-69		Appl2	0.250782	4.55157e-56						Pptc7	0.372641	1.33566e-51						Pspc1	0.451805	9.8409e-38
Cct4	0.397914	2.20331e-184		Far1	0.509077	1.03967e-12						Epn2	0.269524	4.15687e-186						Kdm5b	0.599982	8.18447e-69		Chmp5	0.439629	9.01422e-56						Dynlt3	0.386256	1.40067e-51						Amd1	0.417068	1.02548e-37
Ndufa1	0.397169	2.67571e-184		Lrp6	0.692532	1.05161e-12						Nfe2l1	0.494007	2.33184e-185						Pcdh7	0.914459	1.12969e-68		Map4k5	0.445292	1.49034e-55						Arf6	0.393925	1.5149e-51						Spata5	0.555603	1.03471e-37
Prpf4b	0.419149	3.87062e-184		Add1	0.51172	1.09189e-12						Rpl24	0.562682	2.66199e-185						Rrn3	0.44822	1.6516e-68		Frmd6	0.430116	3.09717e-55						Ambra1	0.551206	1.86361e-51						Retreg1	0.435251	1.26848e-37
Snrpd2	0.394478	2.00157e-183		Arhgap32	0.488088	1.11825e-12						Ammecr1	0.389358	7.9474e-185						Trim16	0.381721	2.08103e-68		Herc4	0.50262	4.07346e-55						Ubap2	0.43902	1.98976e-51						Fam193b	0.394025	1.31876e-37
1110038B12Rik	0.253772	3.19916e-183		Bod1	0.287124	1.11848e-12						Cdh4	0.266159	2.38108e-184						Scaf4	0.60091	2.47989e-68		Pou3f1	0.379111	4.22269e-55						Vps13a	0.442697	2.37247e-51						Gsk3b	0.504734	1.32512e-37
Hdgfl3	0.318155	4.12644e-183		Ube2v2	0.366222	1.13626e-12						Pls3	0.578695	4.741e-184						Ovol1	0.431993	3.87063e-68		Mtmr1	0.383301	4.34462e-55						Mical2	0.297488	2.82962e-51						Slk	0.574088	1.36176e-37
Usp47	0.605735	5.71588e-183		Met	0.354176	1.14513e-12						Cyc1	0.279082	7.10559e-184						Arhgap17	0.881363	4.03183e-68		Grk2	0.362831	5.04647e-55						Trp53bp2	0.403226	3.0032e-51						Erbb3	0.397148	1.442e-37
Selenoi	0.364235	5.80317e-183		Mgll	0.396824	1.25661e-12						Bscl2	0.260703	1.43946e-183						Pkp3	0.355025	4.92975e-68		Arrdc4	0.405256	5.32093e-55						Micos13	0.390597	3.6349e-51						Sdc4	0.587541	1.61495e-37
Plp2	0.304233	7.52701e-183		Arhgap11a	0.284373	1.4237e-12						4833439L19Rik	0.306378	2.69141e-183						Ctdp1	0.511598	5.2685e-68		Rab5a	0.630926	2.03281e-54						Ippk	0.267796	5.15466e-51						Prpf39	0.572379	1.69443e-37
Sgms1	0.892253	1.24996e-182		Hivep2	0.950409	1.43983e-12						Edf1	0.475874	3.07559e-183						Atrx	0.665496	5.35854e-68		Sfn	0.750089	2.83871e-54						Srpk2	0.432646	5.61377e-51						Ralgps2	0.454971	1.97104e-37
Tmem131l	0.382519	4.01444e-182		Dip2c	0.790501	1.56294e-12						Dnmbp	0.396841	1.13507e-182						Irx2	0.40785	8.92041e-68		Slc26a2	0.384517	5.94965e-54						Ubqln1	0.382377	5.64296e-51						Pcm1	0.512903	2.33043e-37
Snrpd1	0.334418	5.78947e-182		Tgfb2	0.568959	1.57972e-12						Tjp1	0.478156	1.60338e-182						Cmip	0.408136	9.70029e-68		Tpm1	0.39686	5.99353e-54						Gng12	0.511333	6.2635e-51						Tnpo3	0.552161	3.28865e-37
Rsl1d1	0.257155	1.15821e-181		Cenpp	0.395584	1.58502e-12						Slc6a14	0.492414	2.81254e-181						Pak3	0.885163	1.13172e-67		Zswim4	0.438124	8.65045e-54						Flrt3	0.319805	7.67267e-51						Shtn1	0.47093	3.70626e-37
Tkt	0.415547	1.77685e-181		Isoc1	0.369445	1.61108e-12						Tprgl	0.31584	3.16242e-181						Arid5b	0.621841	1.64903e-67		4833439L19Rik	0.335021	2.38274e-53						Arpc1a	0.381201	8.46347e-51						Bcas3	0.695858	4.03802e-37
Msi2	0.438947	2.17121e-181		Tfdp1	0.393671	1.73785e-12						Arpc1a	0.411505	2.18698e-180						Shtn1	0.512272	1.93574e-67		F3	0.757575	3.4903e-53						Them5	0.252121	1.08948e-50						Acin1	0.488133	4.7441e-37
Lrch1	0.588181	3.18966e-181		Tagln2	0.847469	2.11571e-12						2610035D17Rik	0.508705	5.82097e-180						Lrp4	0.479156	2.87713e-67		Slc9a3r1	0.255884	5.89597e-53						Sptan1	0.449919	1.20637e-50						Asxl1	0.579524	5.3702e-37
Uri1	0.306551	3.64769e-181		Tnrc18	0.598181	2.23934e-12						Mrps14	0.304015	6.0767e-180						Itsn2	0.79461	3.00742e-67		Micos13	0.501569	7.74753e-53						Arl8b	0.434137	1.25639e-50						Myo18a	0.461449	8.40848e-37
Slc25a5	0.487324	9.25855e-181		Ppp3ca	0.757992	2.44792e-12						Efnb2	0.315689	1.64921e-179						Alkbh1	0.523201	3.04595e-67		Gata3	0.456737	8.27089e-53						Zranb1	0.408956	2.37608e-50						Ppp2r2a	0.488236	8.69396e-37
Cds1	0.315425	1.25076e-180		C1galt1	0.457604	2.502e-12						Ccdc71l	0.493445	3.37829e-179						Fnip1	0.525786	3.32382e-67		4833423E24Rik	0.260668	1.30839e-52						Mical3	0.287564	2.44226e-50						Lrch3	0.601509	9.11705e-37
Spata5	0.352069	2.3213e-180		Bnip2	0.488015	2.58239e-12						Ndufb9	0.469745	4.98426e-179						Nos1ap	0.542482	3.43508e-67		Pdcd4	0.400789	1.32969e-52						Ap1ar	0.324092	2.8515e-50						Serinc2	0.419792	1.13694e-36
Dsp	0.457749	6.58186e-180		Lmo1	0.262951	2.93942e-12						Atp5g1	0.478595	6.95651e-179						Setd2	0.553077	4.01396e-67		Rab3d	0.321354	1.36649e-52						Arhgap21	0.550701	3.01449e-50						Mark4	0.470078	1.26132e-36
Lmo4	0.286576	2.04676e-179		Ehbp1l1	0.316941	3.00354e-12						Cldnd1	0.356122	7.63413e-179						Clip1	0.719948	4.07422e-67		Huwe1	0.513178	1.46521e-52						Pard3	0.502144	3.91037e-50						Jmjd1c	0.54169	1.32436e-36
Srsf10	0.356357	4.07832e-179		Synj2	0.31888	3.11605e-12						Mpc2	0.345431	2.08364e-178						Arhgef37	0.482568	4.14488e-67		Kctd12	0.606375	2.03178e-52						Ppm1d	0.313068	4.82472e-50						Tns3	0.49008	1.40768e-36
Csrp1	0.554507	4.64548e-179		Garem1	0.28302	3.13809e-12						Ttc37	0.363117	6.17465e-178						Prc1	0.565144	5.0194e-67		Ccdc124	0.286927	2.7664e-52						Arhgef11	0.448762	5.47442e-50						Epn2	0.42752	1.61092e-36
Atp5b	0.490214	8.13768e-179		Atp2a2	0.653189	3.19129e-12						Serpinb8	0.329629	1.51666e-177						Zfand6	0.558246	5.47123e-67		Pip5k1a	0.540682	3.00748e-52						Smpdl3a	0.307538	6.52312e-50						Zc3h14	0.441997	1.67436e-36
Rps27rt	0.378232	1.04563e-178		Gabpb2	0.403081	3.2668e-12						Kifc3	0.251197	3.08593e-177						Hsdl2	0.474716	6.3545e-67		Ebp	0.309181	3.28472e-52						Nt5c3	0.315072	7.63018e-50						Rsbn1	0.489412	1.83756e-36
Mbd2	0.53035	1.05261e-178		Pak1	0.458163	3.27927e-12						Garem1	0.301491	8.70773e-177						Khdc4	0.551438	7.72083e-67		Pepd	0.358939	3.35473e-52						Actr1a	0.391484	9.52673e-50						Nfia	0.547143	1.84965e-36
Rasa1	0.439373	1.72658e-178		Vrk2	0.297605	3.43241e-12						Anxa7	0.496197	1.84483e-176						Ube2d2a	0.594106	8.15181e-67		Chmp1b	0.285694	3.54887e-52						Ola1	0.325099	1.27104e-49						Cdk13	0.493559	2.1439e-36
Csnk1a1	0.543711	2.33661e-178		Tmpo	0.501428	3.5954e-12						Eif1ax	0.418944	4.62945e-176						Tenm2	0.323203	8.45096e-67		Dgcr6	0.268078	4.34782e-52						Camsap2	0.472104	1.51494e-49						Slc29a1	0.319425	2.23697e-36
Smarcc1	0.368161	2.41182e-178		C2cd5	0.270793	3.9499e-12						Wdr43	0.375747	7.11232e-176						Tiparp	0.613789	8.76643e-67		Sh3d19	0.567366	4.92907e-52						Ar	0.362624	1.65454e-49						Paxbp1	0.434009	2.33997e-36
Gsto1	0.287578	2.78316e-178		Il1rap	0.261602	5.24277e-12						Eif3g	0.285341	7.60765e-176						Diaph1	0.557952	1.25262e-66		Tmed5	0.525035	5.65925e-52						Nhp2	0.348652	1.81219e-49						Phlpp1	0.423403	2.4022e-36
Ola1	0.331218	4.0735e-178		Anapc1	0.438509	5.7601e-12						Pim3	0.356226	7.78253e-176						Kank1	0.538003	1.71444e-66		Gm11290	0.348895	9.20365e-52						Usp38	0.307448	3.55316e-49						Stau1	0.556472	2.70813e-36
Zfp609	0.420626	6.68712e-178		Mfhas1	0.582811	6.63096e-12						Tcerg1	0.48353	1.18067e-175						Bdp1	0.566342	2.64666e-66		Arl4a	0.459364	1.26137e-51						Tent4b	0.450581	5.24712e-49						Usp37	0.548727	2.76598e-36
Uck2	0.463308	1.26119e-177		Mink1	0.365706	6.8973e-12						Ust	0.482943	3.26873e-175						Ewsr1	0.548068	2.8329e-66		Mapre2	0.387293	1.48222e-51						Strn	0.385728	8.78764e-49						Vangl2	0.360662	2.85523e-36
Ddx10	0.307419	1.41446e-177		Cd44	0.649034	7.08007e-12						Arf6	0.346409	4.1694e-175						Sult5a1	0.543794	3.49028e-66		Mapk3	0.404838	3.05346e-51						Hacd2	0.487382	8.97857e-49						Ctnnb1	0.405826	3.31394e-36
Hspe1	0.479571	2.47035e-177		Cherp	0.296829	7.2885e-12						Robo1	0.277218	5.00391e-175						Clock	0.611635	4.78123e-66		Anxa8	0.680037	3.27567e-51						Brd7	0.320489	1.01676e-48						Xrn2	0.481636	3.48883e-36
Psme2	0.3399	8.75266e-177		Stx18	0.257876	7.60893e-12						Ctnna1	0.609378	1.04825e-174						Slc44a1	0.616972	1.20959e-65		D8Ertd738e	0.705615	3.81179e-51						Polb	0.406504	1.02932e-48						Ccny	0.507939	4.02475e-36
Fubp1	0.534305	9.01756e-177		Med26	0.316111	8.13456e-12						Ssbp2	0.47982	1.60358e-174						Rhbdl2	0.560061	1.38399e-65		Rcn1	0.283763	3.92201e-51						Aacs	0.259241	1.59831e-48						Exoc6b	0.531076	4.42317e-36
Cks2	0.273931	1.69433e-176		Osbpl3	0.460173	8.35374e-12						Psmd7	0.435487	5.31311e-174						Crybg1	0.544341	1.41056e-65		Cramp1l	0.507954	3.93046e-51						Ptma	0.481598	2.11896e-48						Smg7	0.531768	4.89062e-36
Strn3	0.623239	1.83855e-176		Shtn1	0.316195	8.58714e-12						Prdx5	0.542756	7.89082e-174						Pdpk1	0.594954	1.72936e-65		Maoa	0.570439	8.512e-51						Usp10	0.275047	2.84838e-48						Ncl	0.457294	5.02415e-36
Hnrnpa3	0.5566	1.93695e-176		Rasal2	0.704016	8.62436e-12						Lrba	0.368454	2.55319e-173						Tapt1	0.446041	1.84166e-65		Arl5a	0.453107	1.13968e-50						Rpl17	0.540893	3.19686e-48						Maml2	0.707408	5.26801e-36
Atp1a1	0.561288	2.31337e-176		Xpnpep1	0.367672	8.88416e-12						Afdn	0.372547	5.30911e-172						Tab3	0.42195	1.93676e-65		Fis1	0.4269	1.31089e-50						Kdm1a	0.395173	3.37015e-48						Tial1	0.48743	5.56499e-36
Lrrc8b	0.297524	3.56323e-176		E130308A19Rik	0.31931	8.94403e-12						Atl2	0.434076	8.53239e-172						Hnrnpdl	0.460969	2.69056e-65		Atox1	0.521944	1.68392e-50						Cobl	0.254497	5.69359e-48						Smg6	0.596609	7.0122e-36
Prrc2c	0.548246	3.96134e-176		Dis3l2	0.377485	9.32584e-12						Map3k20	0.599029	2.55576e-170						Prrg4	0.525842	3.20644e-65		Mid2	0.434621	2.11584e-50						Akap11	0.459877	5.9662e-48						Zbtb7c	0.477236	7.90755e-36
Nos1ap	0.342581	7.02881e-176		Rai1	0.367479	9.97939e-12						Slc35f5	0.266978	6.91563e-170						Taf4	0.338606	3.22109e-65		Garem1	0.331428	2.77998e-50						Acvr2a	0.377932	6.79075e-48						Mindy3	0.598783	9.55048e-36
Tjp2	0.557364	7.99963e-176		Mtfr1	0.28752	1.00014e-11						Nebl	0.374941	7.67553e-170						Mdm4	0.533634	3.80859e-65		Grpel1	0.277887	1.01876e-49						Upf1	0.251157	7.28383e-48						Gtf2i	0.477607	1.14848e-35
Ndufa4l2	0.565182	1.16664e-175		Trpv3	0.266152	1.03895e-11						Vat1	0.380709	1.82255e-169						Hspa4	0.491165	5.32481e-65		Slc39a8	0.316012	1.47112e-49						Hmg20b	0.304203	8.17928e-48						Abl2	0.533451	1.36809e-35
Eif3h	0.495688	1.40911e-175		Snx14	0.292078	1.06803e-11						Ppp2r3a	0.490903	2.60514e-169						Wdfy2	0.609158	5.58297e-65		Traf6	0.330202	1.61253e-49						Reps1	0.409113	1.0734e-47						Avl9	0.468349	1.54008e-35
Kif21a	0.338476	2.02122e-175		Sox9	0.270475	1.10926e-11						Ube2q2	0.653115	3.77748e-169						Celsr2	0.381197	6.15867e-65		Dlgap4	0.43781	1.87142e-49						Acvr1b	0.353304	1.73905e-47						Bzw2	0.562309	1.82137e-35
Ndfip2	0.517885	2.12807e-175		Rcn2	0.320301	1.14696e-11						Nos1ap	0.253599	6.47072e-169						Nfx1	0.528541	6.49935e-65		Gng12	0.450306	1.89916e-49						Tspan9	0.382552	2.17321e-47						Camsap3	0.337297	1.83227e-35
Supt16	0.372923	4.39099e-175		Cog5	0.491339	1.23683e-11						Tmem87a	0.363308	1.96409e-167						Cachd1	0.598925	7.19745e-65		F11r	0.402334	1.36435e-48						Mfn1	0.298257	2.4073e-47						Pds5b	0.508452	1.96855e-35
Eif3k	0.478965	7.03925e-175		Adcy9	0.372231	1.25255e-11						Znrf3	0.339801	2.20977e-167						Bag4	0.435738	7.49462e-65		Hsdl2	0.341985	1.91372e-48						Tanc1	0.415879	2.40747e-47						Son	0.363208	2.53741e-35
Egln1	0.353556	9.75917e-175		Lrpprc	0.273098	1.37319e-11						Rab5if	0.367775	4.80579e-167						Azin1	0.6572	9.96719e-65		Golt1b	0.292997	2.11344e-48						Metap1	0.37596	2.97973e-47						Dicer1	0.471695	2.56237e-35
Rere	0.59604	1.4158e-174		Gsk3b	0.678553	1.44709e-11						Kdm5b	0.490274	6.36317e-167						Mbnl2	0.477522	1.2257e-64		Endod1	0.341081	2.6487e-48						Cramp1l	0.423585	3.70068e-47						Hace1	0.505472	2.86542e-35
Atp5j2	0.467324	5.37303e-174		Farp2	0.291658	1.6679e-11						Ipmk	0.376297	7.0809e-167						Smg6	0.585614	1.69257e-64		Bscl2	0.263777	3.20621e-48						Calm4	0.710718	3.73356e-47						Zfp654	0.65398	3.56882e-35
Park7	0.32647	7.30946e-174		Rbm10	0.324935	1.73635e-11						Zfyve9	0.363	1.46848e-166						Vapa	0.612322	1.95208e-64		Trp53inp2	0.321617	4.82434e-48						Atp5d	0.428686	4.10611e-47						Cnot2	0.597472	4.14421e-35
Gas1	0.290626	1.04853e-173		Map2k6	0.260519	1.85724e-11						Abcd3	0.312991	2.42047e-166						Gnai3	0.565165	3.60593e-64		Bok	0.266465	1.35439e-47						Csrp1	0.485225	4.16823e-47						Smo	0.389372	5.01384e-35
Rpl10	0.581255	1.6025e-173		Sh3bp1	0.285549	2.25122e-11						Golga4	0.489318	3.39345e-166						Mtm1	0.560325	4.22e-64		Midn	0.376578	3.73076e-47						Tlk1	0.421546	4.49299e-47						F11r	0.476923	5.54706e-35
Sirt1	0.574966	3.98203e-173		Srbd1	0.274073	2.31157e-11						Tollip	0.367961	1.1985e-164						Atg2b	0.440712	5.00633e-64		Fgfbp1	0.394764	4.06375e-47						Lin7c	0.282289	5.30722e-47						St5	0.61137	5.80391e-35
Eif3i	0.389235	4.20613e-173		Tpm4	0.641326	2.53715e-11						Abcf1	0.39827	1.33894e-164						Wnt3	0.292092	5.42728e-64		Egr1	0.501538	4.29267e-47						Laptm4b	0.326018	5.50198e-47						Pias2	0.598412	6.01067e-35
Cox5b	0.462866	9.7768e-173		Tnks1bp1	0.30256	2.57245e-11						Vkorc1l1	0.3546	1.41322e-164						Zdhhc5	0.536094	5.65855e-64		Tead4	0.355436	7.30926e-47						Dlg1	0.494803	5.60369e-47						Cnot1	0.526327	6.79197e-35
Mrps14	0.281504	9.9406e-173		Parp6	0.283166	2.64196e-11						Bcas2	0.325564	1.80764e-164						Usp32	0.669759	6.03059e-64		Nt5c3	0.567956	1.27469e-46						Phlpp1	0.378941	5.67832e-47						Strn	0.487057	7.03564e-35
Mcmbp	0.395455	1.19563e-172		Atg16l1	0.285305	2.65999e-11						Slain2	0.472248	3.53896e-164						Sgk3	0.575356	7.38789e-64		Paip2	0.424585	2.44305e-46						Wdr20	0.379349	6.71297e-47						Akap11	0.576017	7.6761e-35
Abcd3	0.320092	1.50904e-172		Prkar2a	0.341586	2.66045e-11						Trappc10	0.258581	4.84773e-164						Tcf12	0.521407	9.58881e-64		Gsdmc	0.289133	3.05834e-46						Lemd3	0.470729	6.79235e-47						9530026P05Rik	0.60155	7.94628e-35
Ndufb6	0.28672	1.61321e-172		Helz	0.347117	2.73927e-11						Lnpk	0.27492	5.05222e-164						Rab27b	0.806543	1.54535e-63		Prrc1	0.272898	1.17074e-45						Scyl2	0.41158	6.83089e-47						Creb5	0.788266	9.69628e-35
Atp5g1	0.425497	2.64272e-172		Serpinb6a	0.585344	2.76365e-11						Pdap1	0.386093	5.15224e-164						Mob2	0.517974	1.63588e-63		H2-T22	0.269841	1.29559e-45						Gdpd1	0.257196	8.17926e-47						Foxp4	0.50615	1.28913e-34
Sec61a2	0.254075	4.53545e-172		Ppme1	0.397764	2.78248e-11						Arhgap32	0.386108	1.16769e-163						Tollip	0.499223	2.21607e-63		Nhp2	0.398509	1.72661e-45						Cast	0.53049	8.5656e-47						4930523C07Rik	0.444183	1.33966e-34
Dst	0.613132	6.61523e-172		Lman1	0.484005	2.79828e-11						Csnk2b	0.329759	6.19589e-162						Tec	0.910938	2.5549e-63		Il17rc	0.259208	2.1013e-45						Vps54	0.373143	8.85801e-47						Usp15	0.429221	1.34531e-34
Orc4	0.276395	7.83991e-172		Zfp1	0.266016	2.86934e-11						Prdx2	0.473331	1.50083e-161						Kansl1	0.572501	3.69734e-63		Capn15	0.359983	2.73405e-45						Kif1b	0.447868	9.06868e-47						Lrp5	0.377251	1.37762e-34
Scaf4	0.376151	8.00894e-172		Cyp7b1	0.525183	2.90703e-11						Lmbrd2	0.292109	7.32502e-161						Rb1cc1	0.512786	4.17328e-63		Rel	0.479581	3.64365e-45						Ubxn7	0.452911	1.12185e-46						Rbm6	0.511272	1.41535e-34
Npat	0.253957	9.49853e-172		Pgk1	0.650756	2.94078e-11						Lamtor4	0.30495	9.13949e-161						Map3k1	0.556559	4.98734e-63		Golga4	0.45919	3.87551e-45						Ythdf2	0.330097	1.47378e-46						Serpinb8	0.527245	1.66626e-34
Il6ra	0.297694	1.18377e-171		Rad18	0.347213	2.9789e-11						Klf3	0.388704	9.2649e-161						Psen1	0.590189	5.89358e-63		Ddi2	0.40495	4.26671e-45						Rpl4	0.532186	1.4858e-46						Sap130	0.506604	1.77824e-34
Sfr1	0.473066	1.76813e-171		Hspg2	0.38078	3.00122e-11						Ndufb4	0.317043	1.19126e-160						Rasal2	0.547095	6.10124e-63		Eif6	0.406493	5.65056e-45						Abcf1	0.382615	1.76906e-46						D16Ertd472e	0.352375	2.35383e-34
Myo1d	0.35573	2.01146e-171		Sh3kbp1	0.546833	3.21232e-11						Hadha	0.329974	6.33297e-160						Zfp148	0.578591	1.24747e-62		Fam114a2	0.290649	8.80895e-45						Appl1	0.395916	1.80735e-46						Ahctf1	0.520636	2.64651e-34
Senp6	0.498085	3.20751e-171		Sae1	0.383625	3.24092e-11						Ivns1abp	0.341568	7.99844e-160						Map3k3	0.539136	1.41363e-62		Psmc2	0.262159	1.72046e-44						Arpc5l	0.269632	1.98763e-46						Rnd3	0.4454	2.78429e-34
Hspd1	0.414819	3.59949e-171		Snd1	0.798624	3.5875e-11						Kif5b	0.477673	1.13276e-159						Zc3hav1	0.484238	1.9638e-62		Cs	0.406992	1.95885e-44						Tmem87a	0.36872	2.19945e-46						Cldn1	0.379472	2.90907e-34
Pum1	0.55331	3.78031e-171		Crim1	0.728044	3.91693e-11						Hbegf	0.395687	1.95593e-159						Rtf1	0.560098	2.12162e-62		Zranb1	0.493574	2.36355e-44						Csnk2b	0.362703	2.29365e-46						Adnp	0.41984	3.50488e-34
E130308A19Rik	0.334117	3.87725e-171		Sinhcaf	0.276508	4.19492e-11						Chmp5	0.33172	2.36545e-159						Ankfy1	0.507069	2.95094e-62		Rassf5	0.473315	2.54993e-44						Ptpn14	0.27664	2.51788e-46						Mllt10	0.500596	3.87115e-34
Itpkc	0.431954	4.14758e-171		Cdipt	0.276198	4.323e-11						Ndufs5	0.323896	7.16466e-159						Mfsd14a	0.477858	2.98456e-62		Foxo3	0.361522	3.20486e-44						Cs	0.372815	3.54787e-46						Amotl1	0.377068	4.175e-34
Pcdh7	0.603629	4.18976e-171		Chd9	0.581068	4.38475e-11						Atp5j2	0.473274	3.22749e-158						Gigyf2	0.621092	3.01453e-62		Tmem134	0.367797	3.64438e-44						Rab27b	0.372066	3.65114e-46						Smad5	0.3765	4.24445e-34
Ranbp1	0.385744	6.66404e-171		Aco2	0.359061	4.38765e-11						Eif3h	0.488779	3.33318e-158						Ppfia1	0.517519	3.12508e-62		Ak2	0.376132	3.81755e-44						Hnrnpul2	0.34883	4.66941e-46						Atp13a3	0.576027	4.83003e-34
Fam133b	0.300906	7.22591e-171		Cep128	0.380391	4.41199e-11						Eif2s2	0.463523	4.91089e-158						Tgfa	0.472064	3.32442e-62		Pard3	0.493939	4.32513e-44						Ptprk	0.334912	4.72875e-46						Tmem65	0.480303	5.01673e-34
Ssrp1	0.255189	8.08866e-171		Spopl	0.39484	4.59818e-11						Fhit	0.385463	9.19899e-158						Fnbp4	0.434605	3.36385e-62		Map2k2	0.397146	1.69036e-43						Memo1	0.492368	4.81251e-46						Lnpep	0.437067	5.31695e-34
Rpl41	0.51652	8.86535e-171		Sema4c	0.262458	4.77523e-11						Ccdc6	0.355992	1.22419e-157						Prpf38b	0.481301	4.89988e-62		Sema3d	0.290197	1.79749e-43						Lap3	0.278316	6.17921e-46						Stxbp5	0.583123	5.76851e-34
Il20rb	0.308778	9.6491e-171		Hira	0.287686	5.12072e-11						Ndufb2	0.28702	2.50021e-157						Ddx42	0.52503	4.90802e-62		Dennd1b	0.581285	2.2169e-43						Nrbf2	0.275604	6.84735e-46						Txlng	0.448252	6.32929e-34
Gspt1	0.465901	1.03289e-170		Slc12a2	0.31595	5.30725e-11						Eif3l	0.2859	3.23193e-156						E130308A19Rik	0.55964	5.70475e-62		Plxnb2	0.336427	4.50665e-43						Rnf10	0.372103	7.65137e-46						Supt20	0.453304	6.68293e-34
Hnrnpab	0.493139	2.19126e-170		Clstn1	0.268409	5.36828e-11						Arl5b	0.485128	5.15052e-156						Car13	0.493818	8.94971e-62		Ripk2	0.383467	4.84512e-43						Cltb	0.341532	8.72969e-46						Shoc2	0.53719	6.69868e-34
Ppm1l	0.388608	2.94991e-170		Frmd6	0.507197	5.80444e-11						Chmp2b	0.264953	2.13542e-155						Iffo2	0.443445	1.00232e-61		Ifrd1	0.365805	5.04226e-43						Map3k20	0.475668	1.08556e-45						Zmynd11	0.467567	7.41646e-34
Rev3l	0.490981	5.47109e-170		Phf12	0.324626	5.84883e-11						Kmt5a	0.33475	2.35949e-155						Celf1	0.613949	1.31751e-61		Tjp1	0.38517	9.63852e-43						Eif6	0.373933	1.09786e-45						Ppp6r3	0.490994	8.27745e-34
U2af1	0.325578	7.61694e-170		Ski	0.609943	6.13255e-11						Eif3m	0.35802	3.17627e-155						Jak2	0.676729	1.88102e-61		Pik3cb	0.422528	1.27695e-42						Ldlr	0.530436	1.55142e-45						Yeats2	0.376189	8.73855e-34
Rarg	0.284372	1.35439e-169		Cnot2	0.70042	6.21622e-11						Chchd2	0.464794	4.8809e-155						Htt	0.556209	2.41589e-61		Tnip1	0.400168	1.34547e-42						Kmt2c	0.534821	1.58526e-45						Ppp4r3a	0.455417	8.88429e-34
Cpsf6	0.427271	1.89044e-169		Anxa3	0.451895	6.68011e-11						Tomm22	0.294274	7.25256e-155						Mink1	0.511273	3.0156e-61		Uqcc2	0.361244	2.34109e-42						Tnks1bp1	0.258623	2.09468e-45						Rgs12	0.447155	9.54003e-34
St5	0.393735	2.06529e-169		Tbl1x	0.588252	6.75263e-11						Ndufb10	0.337132	9.92581e-155						Mtrex	0.487785	3.93645e-61		Dennd2c	0.381792	5.77247e-42						Dpm1	0.378087	3.03778e-45						Unc45a	0.432809	9.8112e-34
Tdrd3	0.261976	2.58538e-169		Nhsl1	0.511654	6.92004e-11						Ptgfrn	0.326702	2.43069e-154						Ash1l	0.512993	4.05137e-61		Cldnd1	0.352839	6.85278e-42						Rps19	0.514293	4.27332e-45						Smarca5	0.473183	1.03185e-33
Ubap2	0.409151	2.59653e-169		Tpi1	0.848034	6.92022e-11						Twsg1	0.254934	2.91388e-154						Arhgap21	0.773417	4.34003e-61		Crybg1	0.390123	1.22024e-41						Mrpl53	0.270791	6.29695e-45						Thrap3	0.429765	1.08756e-33
Ttc37	0.397497	2.8618e-169		Sun1	0.434823	6.97257e-11						Relch	0.391904	3.04214e-154						Akirin2	0.499993	4.43414e-61		Il15ra	0.285649	2.27091e-41						Fam129b	0.417043	7.39067e-45						Srsf4	0.483918	1.13413e-33
Ndufb5	0.374539	3.21717e-169		Dock1	0.700307	7.39968e-11						Eif3b	0.315709	2.32124e-153						Trappc10	0.464339	4.60467e-61		Hmg20b	0.276082	3.43136e-41						Kat6a	0.394434	9.84242e-45						Upf2	0.490214	1.32177e-33
Rtf1	0.413203	3.93152e-169		Ncor2	0.479031	7.54823e-11						Actg1	0.486337	2.41177e-153						Rasgef1b	0.502556	7.99475e-61		Gars	0.271883	1.60658e-40						Senp6	0.452576	1.08069e-44						Rapgef6	0.542438	1.66032e-33
Sh3pxd2a	0.466781	6.48026e-169		Tbck	0.339413	7.80854e-11						Scamp1	0.419175	2.86559e-153						Hook1	0.385933	1.04925e-60		Ralgps2	0.345425	1.70064e-40						Bcl2l13	0.290264	1.40383e-44						Ankrd28	0.610332	1.85012e-33
Afap1	0.296795	6.50174e-169		Nbas	0.302556	7.87164e-11						Csnk2a2	0.347269	3.89102e-153						Hnrnpm	0.534819	1.08014e-60		Pdxdc1	0.34504	2.57859e-40						Sar1b	0.307206	2.38231e-44						Mdm4	0.455047	1.94822e-33
Focad	0.273425	7.21082e-169		Dennd6a	0.362645	7.90733e-11						Pgls	0.37891	4.62194e-153						Ipmk	0.65618	1.37662e-60		Atg13	0.316435	2.75904e-40						Adgrg6	0.35502	2.68778e-44						Spaca6	0.406911	2.0745e-33
Abce1	0.312271	7.88876e-169		Acsl3	0.648445	8.33275e-11						Pex14	0.357515	7.48657e-153						Eda	0.722453	1.54976e-60		Hdgf	0.400949	3.09731e-40						Nos1ap	0.332143	3.11885e-44						Zmym2	0.483258	2.29724e-33
Myo18a	0.325861	9.20757e-169		Cep192	0.341263	8.63242e-11						Nr6a1	0.455998	7.52015e-153						Celf4	0.354077	1.70556e-60		Wipi2	0.436515	3.26836e-40						Avpi1	0.415196	4.36925e-44						Pbx3	0.707823	2.31606e-33
Cct2	0.391287	1.11565e-168		Robo2	0.338718	8.67653e-11						Ndfip2	0.463235	8.08864e-153						B3galnt2	0.486628	2.01441e-60		Arpc1a	0.395799	3.52608e-40						Rab10	0.422242	5.26439e-44						Mlxip	0.513313	3.06699e-33
Cs	0.391481	1.48043e-168		Strbp	0.408967	8.80643e-11						Rab22a	0.449145	1.03386e-152						Rufy3	0.563142	2.06769e-60		Pls3	0.328891	5.01136e-40						Acbd5	0.472441	6.10769e-44						Rgma	0.415275	3.2723e-33
Pfkp	0.455189	3.59368e-168		Fmnl2	0.402366	9.1428e-11						Wdfy2	0.402267	4.03936e-152						Ezh2	0.587153	2.19213e-60		Tiam1	0.328042	8.1005e-40						Galnt18	0.473205	6.19892e-44						Rab6a	0.539231	3.3172e-33
Med14	0.255244	5.63591e-168		Mnat1	0.308175	9.52249e-11						Ndufa4l2	0.675656	8.82684e-152						Deptor	0.549691	2.21649e-60		Nectin3	0.350434	1.21168e-39						Eif5b	0.406156	9.65488e-44						Camsap2	0.498479	3.50569e-33
Snrpe	0.414159	7.41676e-168		Rgs20	0.354034	1.00012e-10						Mark2	0.472652	1.10507e-151						Adgrf4	0.490487	2.59251e-60		Acvr2a	0.28176	1.50439e-39						Stard4	0.285885	1.01396e-43						Nedd4	0.327586	3.88567e-33
Ube2q2	0.756552	2.45098e-167		Myo18a	0.462952	1.0195e-10						Sec24a	0.476511	1.74386e-151						Rsbn1	0.536977	3.03659e-60		Dynlt3	0.372535	2.4244e-39						Smad1	0.452199	1.21734e-43						Ddx5	0.349024	4.07891e-33
Fnbp1l	0.445155	3.32979e-167		Stil	0.281806	1.02756e-10						Mrps21	0.270362	2.33865e-151						Kpna1	0.569335	3.12495e-60		Chp1	0.376163	7.86398e-39						Mob4	0.36292	2.1517e-43						Mid2	0.480047	4.8178e-33
Mad1l1	0.257288	3.53281e-167		Nfyc	0.28311	1.04997e-10						Brwd3	0.313683	4.37405e-151						Prpf40a	0.503311	3.73828e-60		Oser1	0.305067	1.9829e-38						Prkar2a	0.263739	2.41176e-43						Nr2c2	0.481413	4.92353e-33
Hacd3	0.276206	4.22297e-167		Prss23	0.307587	1.16168e-10						Cox5b	0.462988	4.58971e-151						Orc4	0.449979	5.20169e-60		Map7d1	0.427055	2.47672e-38						Rad23b	0.445941	2.4331e-43						Tlk2	0.531044	5.24284e-33
Camta1	0.463145	4.87762e-167		Zcchc7	0.707082	1.32425e-10						Bmpr1a	0.372473	1.457e-150						Shoc2	0.513411	6.2618e-60		Ahnak	0.412638	2.79138e-38						Smg7	0.445722	2.63989e-43						Dek	0.50188	5.36305e-33
Srsf1	0.294895	2.84937e-166		Cks2	0.503669	1.39561e-10						Pum2	0.53026	4.41223e-150						Tnfrsf19	0.457764	8.04288e-60		Cope	0.343669	2.87711e-38						Brwd3	0.323222	2.88887e-43						Ythdf3	0.415535	5.44789e-33
Dut	0.258878	2.89359e-166		Sema3c	0.360021	1.41174e-10						Amotl1	0.28201	7.77056e-150						Cdc37l1	0.491136	8.4538e-60		Baiap2	0.27026	3.01426e-38						Atp2a2	0.411071	4.53396e-43						Nup98	0.577846	5.60183e-33
Anln	0.431417	5.22809e-166		Got2	0.42796	1.46895e-10						Ssr4	0.439461	1.23774e-149						Smoc2	0.474413	8.91313e-60		Cul3	0.597447	4.01569e-38						Atp5a1	0.399952	4.73635e-43						Atp11c	0.63439	6.35943e-33
Uqcc2	0.384021	1.73069e-165		Fto	0.671574	1.53077e-10						Atp5c1	0.411673	3.30747e-149						Itgb4	0.435995	1.15903e-59		Mob2	0.306921	7.5581e-38						Rpl13	0.478588	4.76511e-43						Ubr3	0.501409	6.64735e-33
Numa1	0.32517	2.02436e-165		Plp2	0.520191	1.53415e-10						Cyb5a	0.369161	8.58361e-149						Lipm	0.453936	1.2343e-59		Usp7	0.379297	1.74907e-37						Rpl12	0.520593	6.24219e-43						Fbxw7	0.51878	6.75133e-33
Tcf20	0.435143	2.22831e-165		Dbf4	0.269613	1.55777e-10						Glrx3	0.34107	2.10451e-148						Ptgfrn	0.536371	1.4422e-59		Tollip	0.361115	1.75528e-37						Trp53inp1	0.32458	7.21394e-43						Stat3	0.673248	7.42351e-33
Clcn3	0.347644	2.51389e-165		Ptpn3	0.333348	1.67386e-10						Ift20	0.28172	3.12932e-148						Osbpl9	0.36429	1.54486e-59		Ctsh	0.358939	2.03514e-37						Rps3a1	0.444707	1.07621e-42						Hook1	0.385107	8.13907e-33
Cdk19	0.515514	2.53303e-165		Csnk1g1	0.580086	1.84511e-10						Gm2000	0.413401	5.20313e-148						Rif1	0.482489	1.73288e-59		Scamp1	0.380229	2.09293e-37						Cpeb2	0.406625	1.08547e-42						Plxna2	0.81034	1.14618e-32
Luzp1	0.513354	2.71897e-165		Hdac1	0.378476	1.87526e-10						Fosl1	0.38695	5.24997e-148						Retreg3	0.545703	1.73969e-59		Mocs2	0.265618	3.02466e-37						Vcl	0.451643	1.48949e-42						Pkp3	0.29737	1.33214e-32
Ubxn7	0.454517	5.49713e-165		Cdk6	0.628217	1.97259e-10						Rab10	0.564387	5.43577e-148						Tial1	0.558729	2.65729e-59		Lrp10	0.306257	3.0772e-37						Frmd6	0.346404	1.49028e-42						Stmn1	0.524626	1.34901e-32
Garem1	0.355889	7.09435e-165		Mki67	0.86186	2.02436e-10						Frk	0.386037	2.22292e-147						Ptpn14	0.507248	2.66764e-59		Dcun1d1	0.26971	3.15027e-37						Npat	0.289263	2.54189e-42						Pard3b	0.720688	1.37119e-32
Arntl	0.438934	2.66266e-164		Map1b	0.481571	2.02896e-10						Nop53	0.416785	7.03702e-147						Ccdc88c	0.34734	3.65775e-59		Mbtd1	0.399778	5.86519e-37						Arhgap12	0.455931	3.11308e-42						Agfg1	0.443526	1.40914e-32
Snrnp48	0.26648	2.70287e-164		Ufl1	0.270592	2.05475e-10						Ripk2	0.330813	8.73403e-147						Ube3a	0.499821	5.34772e-59		Acox1	0.27848	8.60408e-37						Tmcc3	0.340893	3.91563e-42						Nr3c1	0.549289	1.41955e-32
Shroom4	0.418422	2.91121e-164		Kdm5b	0.518559	2.16331e-10						Srebf2	0.337875	1.01937e-146						Mark4	0.424799	6.58147e-59		Krt17	1.47094	9.591e-37						Oxr1	0.302341	3.96248e-42						Cd2ap	0.410657	1.554e-32
Ndufb2	0.287883	6.99272e-164		Bmpr1a	0.400981	2.28079e-10						Cox7c	0.461415	1.18841e-146						Hip1r	0.407936	9.07004e-59		Edf1	0.40244	1.2443e-36						Atf6	0.481036	4.53877e-42						Eif3j1	0.487565	1.58965e-32
Cpne3	0.257778	8.34447e-164		Trip11	0.543711	2.72375e-10						Cst3	0.336138	1.72378e-146						Map4k5	0.641596	9.07646e-59		Mknk2	0.272121	1.28303e-36						Cldnd1	0.288779	4.86027e-42						Adss	0.469641	1.64103e-32
Eif3m	0.3739	1.09281e-163		Cd24a	0.528239	2.75254e-10						Cct2	0.371127	3.19488e-146						Galnt7	0.517221	1.04581e-58		Usp32	0.388974	1.3705e-36						Egr1	0.650541	5.10756e-42						Il13ra1	0.556059	1.71413e-32
Cct5	0.361291	1.27699e-163		F3	0.714592	2.86913e-10						Ndufs6	0.330207	7.85105e-146						Cdkal1	0.541157	1.65018e-58		Stub1	0.274635	1.41114e-36						Dhx15	0.403886	6.25976e-42						Kdm2a	0.488465	1.73913e-32
Bcr	0.260797	1.48674e-163		Usp14	0.363304	3.00208e-10						Phactr4	0.353212	1.14428e-145						Limk2	0.348754	2.27996e-58		Dbi	0.655206	2.22736e-36						Rpl5	0.482167	6.28704e-42						Utrn	0.381389	2.11685e-32
Rbbp7	0.323906	2.59749e-163		mt-Nd1	0.778295	3.05589e-10						Mill1	0.289883	1.73066e-145						AA986860	0.532931	2.40898e-58		Mill1	0.431974	3.08066e-36						Xpo7	0.425123	6.6811e-42						Myo6	0.418084	2.28202e-32
Mpc2	0.267432	4.00825e-163		Eri3	0.342897	3.15703e-10						Nemf	0.344923	1.05785e-144						Uba6	0.574703	2.44204e-58		Scd2	0.517617	5.33728e-36						Ahcyl1	0.407773	6.78339e-42						Eml4	0.569051	2.48787e-32
Tra2b	0.5202	1.07733e-162		Arpp19	0.562529	3.71342e-10						Huwe1	0.555485	1.50634e-144						Jarid2	0.581144	2.90908e-58		Ttc39b	0.376324	6.82543e-36						Ipo8	0.253912	8.43557e-42						Ybx3	0.306814	2.53408e-32
Lsm4	0.27358	1.10339e-162		Setd3	0.511393	5.13637e-10						Timm23	0.355605	4.44474e-144						Itga3	0.413867	2.91873e-58		Ralgapa2	0.406828	8.93659e-36						Aggf1	0.307303	8.59375e-42						Rcc2	0.413285	2.73962e-32
Tbl1x	0.538931	1.47983e-162		Cpne3	0.403521	5.70308e-10						Senp2	0.473526	6.39854e-144						Eif3j1	0.564957	2.96178e-58		Hook3	0.400533	9.56301e-36						Serbp1	0.402227	1.13149e-41						Zbtb44	0.399637	2.84387e-32
Ndufa10	0.250933	6.9088e-162		S100a10	0.932729	5.75994e-10						Cramp1l	0.319719	4.04221e-142						Vps54	0.489512	3.20489e-58		Erp44	0.32085	1.91637e-35						Parl	0.263673	1.20691e-41						Uap1	0.675348	2.84426e-32
Aimp1	0.250985	9.5758e-162		Oaf	0.388677	5.80692e-10						Gas5	0.478851	1.06979e-141						Tor1aip2	0.470276	6.1604e-58		Gtf2f2	0.299082	1.93124e-35						Arhgap32	0.344734	1.40894e-41						Sun1	0.385306	3.04417e-32
S100a10	0.560156	1.11192e-161		Uri1	0.279715	6.27163e-10						Yap1	0.350649	2.92191e-141						Tspan14	0.49342	7.55128e-58		Pycard	0.559567	2.17362e-35						Traf3ip2	0.293413	1.49811e-41						Ldlrad3	0.52682	3.73541e-32
Smc1a	0.389463	1.47133e-161		Mipol1	0.284232	6.40665e-10						Ahnak	0.488688	4.74556e-141						Kat6a	0.514903	1.13729e-57		Cyth3	0.342053	3.20832e-35						Tle1	0.359281	1.57206e-41						Dtnb	0.530728	4.96137e-32
Maf	0.423681	1.97844e-161		S100a16	0.553312	6.58333e-10						Taf3	0.26443	5.51233e-141						Txlng	0.526149	1.15099e-57		Plxna2	0.329234	3.27637e-35						Bzw2	0.456435	1.83116e-41						Pus7	0.368251	5.26326e-32
Cstdc5	0.697312	2.66354e-161		Ehmt1	0.471537	6.95855e-10						Syne2	0.424674	1.48609e-140						Ptgs1	0.457244	1.19941e-57		Irf6	0.36887	9.90189e-35						Eps15l1	0.373092	2.23711e-41						Sik1	0.589828	5.83241e-32
Srsf7	0.365705	3.90177e-161		Mtor	0.256256	7.11791e-10						Tanc1	0.342582	3.40745e-140						Stk38l	0.470182	1.47857e-57		Acly	0.299741	1.84337e-34						Rps7	0.515178	2.41794e-41						Oga	0.492106	6.14353e-32
Pdap1	0.369443	9.65398e-161		Thap12	0.266917	7.38656e-10						Snhg1	0.261453	3.96397e-140						Crybg2	0.346525	1.55483e-57		Srebf2	0.282042	2.51961e-34						Mbtd1	0.480006	2.43547e-41						Plek2	0.321954	6.3867e-32
Dhx15	0.426754	1.39753e-160		Ppip5k2	0.286416	7.66791e-10						Rps27rt	0.330083	4.0409e-140						Slc9a1	0.535963	3.11392e-57		Mark4	0.280814	3.2438e-34						Ckap5	0.351812	2.5048e-41						Npat	0.463568	6.9468e-32
Llph	0.318576	3.02217e-160		Tmem165	0.443915	7.71591e-10						Arhgap5	0.418168	5.22658e-140						Mprip	0.505333	3.91273e-57		Retreg3	0.313934	3.7614e-34						Rpl30	0.450782	2.67185e-41						Susd6	0.59762	7.15339e-32
Dnmt1	0.27065	5.68973e-160		Kif23	0.357602	9.15454e-10						Ndufa4	0.359765	6.53428e-140						Kat7	0.437647	3.97403e-57		Pa2g4	0.280296	4.24917e-34						Sun1	0.30799	2.81766e-41						Chd1	0.4929	7.18028e-32
Hspa4	0.459961	5.93582e-160		Tubb6	0.53742	9.29279e-10						Clasp1	0.442345	8.8577e-140						Neo1	0.51395	5.95975e-57		Ube2r2	0.553952	5.19658e-34						Ube2q2	0.421183	2.88733e-41						Ambra1	0.475737	7.22897e-32
Eif3l	0.26291	1.78156e-159		Nr6a1	0.585816	9.32827e-10						Atp5h	0.403588	9.13722e-140						Mllt3	0.623705	6.11181e-57		Senp2	0.394292	5.60549e-34						Riok1	0.328983	2.97709e-41						Ltbp3	0.310283	9.47303e-32
Rad51b	0.657174	1.89973e-159		Zfp292	0.563268	9.60553e-10						Sprr1b	0.729566	1.44808e-139						Zfand5	0.508505	6.81761e-57		Glrx	0.435374	7.08476e-34						Rps16	0.469938	3.2627e-41						Mast4	0.383603	1.35638e-31
Stt3b	0.413858	3.29102e-159		Phtf1	0.307321	9.96508e-10						Ndufb11	0.373347	1.68024e-139						Mkln1	0.593144	7.31707e-57		Sec24a	0.398142	9.6326e-34						Uchl3	0.262941	3.3845e-41						Pvt1	0.585055	1.35707e-31
Hist1h1e	0.613173	4.04895e-159		Arap2	0.486022	1.00063e-09						Ubl5	0.408551	4.25702e-138						mt-Atp8	0.412088	8.51613e-57		Ier2	0.378159	1.15257e-33						Vkorc1l1	0.389118	4.92004e-41						Sec63	0.436788	1.55755e-31
Gm2000	0.419717	4.24422e-159		Ssr1	0.480555	1.08223e-09						Metap1	0.316374	6.53405e-138						Atad2b	0.549329	9.05716e-57		Mt4	0.384165	1.41783e-33						Slco3a1	0.561165	6.45889e-41						Wwtr1	0.424634	1.90691e-31
Ttc3	0.450481	4.4459e-159		Zfp609	0.563947	1.10996e-09						Tmem131l	0.284536	6.81333e-138						Tnpo3	0.505485	1.26159e-56		Tnik	0.341353	1.72898e-33						Snapc3	0.287125	6.68144e-41						Ylpm1	0.393444	2.04158e-31
Cox4i1	0.450089	4.7519e-159		Nsmce1	0.359853	1.16029e-09						Hsf2	0.259028	1.14137e-137						Npat	0.465741	1.3117e-56		Jund	0.350568	1.84824e-33						Dcbld1	0.302504	7.37945e-41						Ppp1r12a	0.471051	2.07464e-31
Hsp90ab1	0.484067	5.50252e-159		Mid2	0.272219	1.18314e-09						Metap2	0.403449	2.05671e-137						Spint2	0.391013	1.58718e-56		Mast4	0.360817	4.25576e-33						Prnp	0.341796	9.65376e-41						Mtrex	0.422992	2.34772e-31
Trip11	0.416667	5.67367e-159		Sept11	0.442347	1.27949e-09						Map3k8	0.325391	3.29444e-136						Serpinb8	0.590926	1.72929e-56		Cnot6l	0.516902	5.10586e-33						Foxo1	0.292877	1.12941e-40						Ilf2	0.473115	2.72226e-31
Mef2a	0.579969	1.65005e-158		Tomm40	0.254739	1.28326e-09						Gnai3	0.423709	5.02093e-136						Gng12	0.530908	1.74136e-56		Rpl36al	0.365569	6.9552e-33						Kif1c	0.27124	1.13345e-40						Spag9	0.548884	3.09962e-31
Nop10	0.279805	1.78587e-158		Snx27	0.470263	1.64654e-09						Psmb5	0.297627	5.42653e-136						Tex10	0.454295	2.29047e-56		Ubl3	0.62362	1.29956e-32						Znrf3	0.356161	1.35201e-40						Tenm3	0.450982	3.41465e-31
Prkar2a	0.26947	5.09251e-158		Creb3l2	0.319851	1.66402e-09						Eif4g2	0.428935	7.57167e-136						Fgfr1op	0.388107	2.61549e-56		Ambra1	0.420413	1.48526e-32						Tom1	0.304445	1.82548e-40						Nck2	0.39971	3.83898e-31
Maoa	0.303972	1.14069e-157		Ptprg	0.416493	1.72248e-09						March5	0.340677	1.0242e-135						Crebrf	0.520161	2.90141e-56		Ndufc1	0.30711	1.91238e-32						Cdsn	0.541593	1.84725e-40						Galnt3	0.333861	3.84855e-31
Hnrnpu	0.450389	1.73737e-157		Arhgef5	0.252895	1.81167e-09						Xrn2	0.450548	1.66242e-135						Numa1	0.479051	4.59535e-56		Prkar2a	0.268455	1.42574e-31						Gapvd1	0.390227	2.12152e-40						Rreb1	0.426738	4.33588e-31
Ubac2	0.374303	5.69421e-157		Socs6	0.362301	2.12651e-09						Timm13	0.356052	5.2861e-135						Plekha1	0.483653	5.88409e-56		Foxo1	0.308837	2.0626e-31						Ubr5	0.48726	2.34401e-40						Peli1	0.516807	5.641e-31
Actn4	0.486475	8.07922e-157		Tmx3	0.408358	2.20714e-09						Ndufb8	0.303504	7.89888e-135						Emp2	0.329665	6.18839e-56		Hcfc1r1	0.279291	2.32075e-31						Amd1	0.302891	2.95766e-40						Frs2	0.5017	6.19471e-31
H2afv	0.460374	1.18845e-156		Cspp1	0.35477	2.40216e-09						Supt6	0.299344	1.22769e-134						Mfn1	0.414426	6.28765e-56		Ppp1r2	0.309282	3.73696e-31						Ndel1	0.371261	3.01413e-40						Alkbh1	0.436057	7.82776e-31
Rbm27	0.36646	1.37322e-156		Hmgcr	0.79782	2.40635e-09						Eif4g1	0.404849	1.41815e-134						Mapk1	0.499484	6.52093e-56		Smap2	0.416799	3.89742e-31						Tmed9	0.31126	3.78839e-40						Fam83f	0.280195	7.99637e-31
Ubp1	0.308183	1.37704e-156		Itpk1	0.275103	2.40837e-09						Rasa1	0.389541	6.02545e-134						Etf1	0.528524	7.24722e-56		Kmt5a	0.32087	6.93476e-31						Crim1	0.326986	4.23588e-40						Wwox	0.736404	8.57596e-31
Riok2	0.256588	1.47039e-156		Uba1	0.414422	2.43469e-09						Tsc22d2	0.583518	7.84164e-134						Rapgef6	0.510831	9.00527e-56		Slk	0.44671	7.85269e-31						Sap130	0.315394	5.2462e-40						Ddx10	0.490967	8.63904e-31
Fgd6	0.271378	1.70935e-156		Ddb1	0.465118	2.48456e-09						Eif3c	0.406555	7.92575e-134						Mon1a	0.314854	1.14911e-55		Rplp0	0.498557	8.89856e-31						Bcas3	0.401388	5.50871e-40						Dusp6	0.429881	8.71919e-31
Snu13	0.292373	2.3795e-156		Sgk3	0.371237	2.58599e-09						Smdt1	0.365704	1.46225e-133						Rab11a	0.521502	1.22146e-55		Cdkn1a	0.308821	1.09105e-30						Pcyt2	0.263459	6.07575e-40						Gm35188	0.361167	1.07565e-30
Atg3	0.461347	4.50843e-156		Hr	0.325585	2.75801e-09						Atf3	0.654195	6.24148e-133						Avl9	0.466433	1.4161e-55		Glcci1	0.422033	1.12533e-30						Slc26a2	0.25745	6.74271e-40						Mapkbp1	0.376002	1.07859e-30
Cbfa2t2	0.28109	2.15295e-155		Strn3	0.683003	2.78405e-09						Tle4	0.462193	7.22209e-133						Ncor1	0.48346	2.05479e-55		Tom1l2	0.311083	2.04385e-30						Usp25	0.464799	7.59155e-40						Kdm5a	0.447014	1.25289e-30
Frk	0.359759	2.79941e-155		Bcl2l13	0.371411	2.81432e-09						Ddx21	0.274414	1.356e-132						Bcl11a	0.411445	2.10665e-55		Hectd1	0.353828	2.10705e-30						Rps18	0.505238	8.28693e-40						Wdr33	0.441567	1.25954e-30
Prpf39	0.422992	6.54628e-155		Ufsp2	0.282526	2.83453e-09						Slmap	0.498497	2.12747e-132						Otud4	0.498595	2.15153e-55		Zc3h15	0.283405	2.71199e-30						Tprgl	0.268307	8.59145e-40						Supt16	0.430433	1.39065e-30
Ppp4r1	0.415387	1.07998e-154		Fam135a	0.477234	3.05948e-09						Uqcr11	0.383839	3.63742e-132						Cop1	0.604961	2.29678e-55		Smdt1	0.35991	3.56593e-30						Stim2	0.42144	8.7125e-40						2610035D17Rik	0.571371	1.42783e-30
Neo1	0.25963	1.36994e-154		Zfp346	0.269011	3.1796e-09						Maf	0.300105	1.10028e-131						Tent4b	0.576189	2.42975e-55		Uba1	0.308452	3.60028e-30						Npepps	0.434751	9.18128e-40						Tnrc18	0.399135	1.56616e-30
Zfp266	0.257325	2.04498e-154		Itga5	0.507575	3.18743e-09						Mtmr10	0.297198	1.15116e-131						Dab1	0.366091	2.61721e-55		Wasl	0.356399	6.48518e-30						Carmil1	0.314301	9.19222e-40						Ncor2	0.424404	1.89225e-30
Bcas2	0.288894	5.20987e-154		Arid2	0.439489	3.1884e-09						Psen1	0.387735	4.67292e-131						Fbxo36	0.433985	2.87793e-55		Psmc3	0.26482	6.9058e-30						Arl5b	0.400196	1.34189e-39						Foxj3	0.475784	1.90886e-30
Ctdspl	0.293637	5.93563e-154		9530026P05Rik	0.566443	3.43533e-09						Il1rl2	0.254366	8.41054e-131						Luc7l	0.449545	3.15275e-55		Eif4g1	0.333894	7.13362e-30						Sik1	0.33025	1.39702e-39						Jmy	0.39967	2.66727e-30
Hk1	0.292547	1.55304e-153		Lrrk1	0.319349	3.72405e-09						Ndufv3	0.299649	1.02463e-130						Usp38	0.434825	3.48684e-55		Cast	0.333234	7.73384e-30						Kdm6a	0.437746	2.11147e-39						Fmr1	0.428479	4.10529e-30
Btf3	0.454498	3.86072e-153		Adk	0.388823	3.90067e-09						Cdc37	0.269238	3.92805e-130						Wwc2	0.557655	3.51972e-55		Smpdl3a	0.273529	1.51314e-29						Mtf2	0.34346	2.50258e-39						Dpm1	0.413252	4.97482e-30
Ankrd17	0.54486	4.31563e-153		Ccnd2	0.337272	4.02478e-09						Ubqln1	0.278725	5.27052e-130						Casc3	0.449627	4.78373e-55		Vamp8	0.330629	2.60522e-29						Rpl7	0.434764	2.7063e-39						Baz2b	0.290241	5.80021e-30
Stim2	0.46629	4.47209e-153		Olfm2	0.382453	4.62759e-09						Snhg8	0.277017	1.75468e-129						Perp	0.307023	4.84366e-55		Ndufa11	0.27235	2.95399e-29						Zfp654	0.375234	2.91137e-39						Uba6	0.509615	7.63667e-30
Diaph3	0.568482	7.10928e-153		Adnp	0.401657	4.65027e-09						Chmp2a	0.288218	7.8531e-129						Ranbp2	0.451894	4.88484e-55		Srgap2	0.367487	3.37756e-29						Atl2	0.324031	3.62694e-39						Mink1	0.422324	7.85265e-30
Tpd52l2	0.266623	9.96329e-153		Smyd3	0.633139	4.73332e-09						Mcc	0.332226	8.18415e-129						Gpbp1	0.499402	5.99245e-55		Suco	0.35667	3.38615e-29						Bcr	0.332794	3.68314e-39						Rprd2	0.448356	8.29146e-30
Ptp4a2	0.557229	1.02025e-152		Nup160	0.315704	4.75363e-09						Klhl7	0.26182	4.07195e-128						Rangap1	0.381483	6.0774e-55		Vcp	0.312578	3.9543e-29						Eif3j1	0.343392	4.67224e-39						Paics	0.325118	8.81116e-30
Nectin1	0.280026	1.0417e-152		Ttc37	0.43961	4.90429e-09						Mxd4	0.263326	4.28835e-128						Ahcyl1	0.479971	7.42864e-55		Cdyl	0.435498	5.19483e-29						Rarg	0.322863	4.97589e-39						Dlg1	0.501454	1.0613e-29
Hdgf	0.400942	1.53103e-152		Ube2d1	0.300856	5.06735e-09						Ambra1	0.475239	9.41281e-128						Il34	0.62091	7.76602e-55		Bag1	0.35201	8.80808e-29						Mob1b	0.37311	5.04563e-39						mt-Nd4l	0.392693	1.1634e-29
Tmtc2	0.307768	1.67774e-152		Tdg	0.262415	5.24882e-09						Ddx46	0.285756	1.2792e-127						Rheb	0.525378	1.00859e-54		Fos	0.331863	1.14435e-28						Herc4	0.376952	5.80291e-39						Ip6k2	0.328374	1.18711e-29
Spin1	0.277958	3.11807e-152		Scaper	0.477972	5.29716e-09						Oxct1	0.30208	2.21602e-127						Ern1	0.303465	1.04959e-54		Chchd2	0.29708	2.55737e-28						Dip2b	0.44451	5.8769e-39						Rabgap1l	0.403523	1.31106e-29
Schip1	0.315967	4.43613e-152		2610528A11Rik	0.251294	5.42762e-09						Mboat2	0.344772	2.37559e-127						Ube2d3	0.489975	1.33849e-54		Cstb	0.32123	2.64503e-28						Kif16b	0.281054	7.13941e-39						1810026B05Rik	0.468968	1.5328e-29
Top2b	0.447814	5.14454e-152		Rnf217	0.459264	5.67234e-09						Bsdc1	0.279278	4.15701e-127						Uty	0.485218	1.5688e-54		Qars	0.263937	4.28996e-28						Smyd3	0.477172	7.51569e-39						Ranbp2	0.416045	1.584e-29
Slain2	0.427084	7.59375e-152		Smarcc1	0.418132	5.84601e-09						Ppia	0.428577	4.71959e-127						Zfp609	0.60509	1.62328e-54		Ldlr	0.352638	4.50055e-28						Map3k1	0.3758	7.58186e-39						Appbp2	0.500889	1.76064e-29
Aebp2	0.485299	1.23516e-151		Rif1	0.297803	5.96877e-09						Nsa2	0.399129	7.68532e-126						Il6ra	0.501266	2.01581e-54		Mapk14	0.296471	4.6034e-28						Supt6	0.310487	7.87171e-39						Dock9	0.345085	1.76122e-29
Arhgef12	0.403228	1.68831e-151		Arhgap5	0.545628	6.16773e-09						Rora	0.34482	9.43611e-126						Wdr36	0.438191	2.51259e-54		Crip2	0.303548	7.40552e-28						Dhx9	0.397444	8.74455e-39						Eif5b	0.426019	1.78552e-29
Slc25a25	0.333325	1.90752e-151		Sec11a	0.519874	6.8835e-09						Atp5o	0.339289	4.62058e-125						Sos2	0.575605	2.71944e-54		Calm2	0.530342	7.95566e-28						Slc25a17	0.250589	1.17047e-38						Matr3	0.375908	2.07438e-29
Pde7a	0.261952	2.07885e-151		Itfg1	0.33482	7.0662e-09						Exoc6b	0.481041	5.18e-125						Dlg1	0.507162	2.73477e-54		Mon2	0.305862	1.65764e-27						Micu3	0.273823	1.24829e-38						Emb	0.35156	2.35762e-29
Wasl	0.412177	2.79344e-151		Tcf12	0.592056	7.1644e-09						Dennd4c	0.559664	5.44563e-125						Sik1	0.512884	2.89168e-54		Ube2d3	0.441094	3.26248e-27						Rpl15	0.468516	1.79984e-38						Ptpn21	0.310463	2.36619e-29
Tomm7	0.385168	3.67811e-151		Efl1	0.275363	7.27586e-09						Lamtor2	0.284271	2.78653e-124						Ezr	0.383912	3.49793e-54		Pnpla8	0.258508	6.10898e-27						Rtf1	0.349439	2.06803e-38						Epb41	0.421761	2.51378e-29
Mbnl1	0.470293	5.70866e-151		Immp2l	0.445273	8.20065e-09						Ndufb5	0.290614	6.05251e-124						Acbd5	0.629889	3.75581e-54		Atp6v0b	0.285576	1.36005e-26						Copg2	0.287986	2.24114e-38						Naa16	0.463422	2.62217e-29
Zbtb16	0.261871	6.16029e-151		Myadm	0.530557	8.6593e-09						Ier2	0.291956	6.34158e-124						Wdr44	0.644234	3.82497e-54		Clasp1	0.42443	2.40052e-26						Socs6	0.251884	2.29901e-38						Lrrc4	0.358709	2.66672e-29
Ndufb4	0.270898	6.83835e-151		Wwc1	0.38403	8.9878e-09						Vcl	0.45853	9.02536e-124						Ap1ar	0.455034	3.90192e-54		Ppm1b	0.299232	4.33994e-26						Ralbp1	0.305063	2.43493e-38						Usp7	0.40639	2.93271e-29
Cnbp	0.41067	1.22724e-150		Plcg1	0.404458	9.06572e-09						Rpl38	0.463197	1.78808e-123						Cyp51	0.466158	3.94028e-54		Ccdc6	0.286244	5.13887e-26						Erc1	0.447901	2.53659e-38						Rlf	0.454151	3.16514e-29
Kdm6a	0.482079	1.30109e-150		Yipf5	0.318992	9.21861e-09						Atp5a1	0.359511	3.18276e-123						Rbm25	0.467958	5.24738e-54		Uba52	0.362757	5.2773e-26						Tapt1	0.255164	2.85878e-38						Simc1	0.354059	3.59407e-29
Cdk6	0.499024	1.41825e-150		Sike1	0.281568	9.43939e-09						Atp5k	0.309665	5.50617e-123						Kdm5a	0.513225	5.6198e-54		Ranbp9	0.3953	6.11364e-26						Txlng	0.34016	2.88439e-38						Oxct1	0.444968	3.60345e-29
Tecr	0.257972	1.42331e-150		Ctnnd1	0.502636	9.85662e-09						Slk	0.463442	1.17457e-122						Plxna2	0.512403	5.62282e-54		Myo1e	0.306864	6.71208e-26						Pdhb	0.256255	3.3291e-38						Spen	0.360285	5.04782e-29
Tcea1	0.358856	1.57303e-150		Dgka	0.320673	1.01121e-08						Cox7b	0.356667	1.60571e-122						D230025D16Rik	0.439108	6.00855e-54		Faf1	0.268452	7.41222e-26						Srebf2	0.349203	4.29475e-38						8030462N17Rik	0.3672	5.14515e-29
Micos13	0.279009	3.19902e-150		Usp46	0.272488	1.10941e-08						Gramd3	0.29028	5.69299e-122						Pou3f1	0.286848	9.02101e-54		Rab18	0.307745	1.06003e-25						Brwd1	0.454968	4.37541e-38						Baz1b	0.431067	5.44322e-29
Thrap3	0.438186	3.36271e-150		Pdia3	0.54742	1.11582e-08						Ahcyl1	0.352491	3.00781e-121						Lmtk2	0.460587	9.30069e-54		Micu2	0.252771	1.8575e-25						Rab6a	0.398372	4.73926e-38						Trip11	0.415586	5.87341e-29
Hsf2	0.308171	3.69316e-150		Tspo	0.697758	1.124e-08						Cachd1	0.259532	3.88806e-121						Usp3	0.566675	1.05144e-53		Heca	0.263976	1.96057e-25						Ythdc1	0.451971	4.90127e-38						Ehmt1	0.435376	6.00759e-29
Fbxw7	0.386985	5.38155e-150		Spcs2	0.44057	1.15599e-08						Gm10076	0.637001	8.57658e-121						Bcr	0.45132	1.55259e-53		Atp2a2	0.27571	2.59091e-25						Ypel5	0.275841	5.98535e-38						Ube3a	0.390303	6.60939e-29
Hmgb2	0.686473	6.35922e-150		Sec63	0.506487	1.22898e-08						Psmb3	0.290247	9.55538e-121						Lnx2	0.465315	1.81192e-53		Cd82	0.256487	3.4103e-25						Rpl26	0.450575	6.27659e-38						Laptm4b	0.371746	6.88544e-29
Srsf3	0.440265	1.6377e-149		Capns1	0.782656	1.29878e-08						Map4k5	0.349127	1.10914e-120						Exph5	0.471711	2.22334e-53		Map2k3	0.325939	3.77431e-25						Spast	0.293176	8.77481e-38						Tfap2c	0.286899	8.8809e-29
Acvr1	0.381817	3.18841e-149		Tex261	0.262269	1.34548e-08						Snrpf	0.259352	7.07912e-120						Asap1	0.617664	2.72054e-53		Uqcrb	0.270208	5.19841e-25						Upf2	0.316585	9.20842e-38						Tmem87a	0.409866	9.19645e-29
Tra2a	0.485574	5.20065e-149		Taf4b	0.340956	1.40097e-08						Top1	0.444316	2.36908e-119						Acvr2a	0.522266	2.8864e-53		Itgb5	0.31513	6.84893e-25						Jun	0.611865	1.08287e-37						Smc3	0.385938	1.20464e-28
Ppp4r3a	0.331138	9.59852e-149		Mllt10	0.554432	1.40847e-08						Psmb1	0.344438	2.03053e-118						Cnksr3	0.619072	3.20822e-53		Tsc22d4	0.260205	8.47498e-25						Kdm5b	0.366677	1.098e-37						Hnrnpa2b1	0.339713	1.57081e-28
Atf3	0.949746	1.08716e-148		Chd6	0.519594	1.47545e-08						Pik3cb	0.271247	8.9042e-118						Gpr87	0.257097	9.38723e-53		Fer	0.265825	1.05745e-24						Ankrd13c	0.290335	1.14399e-37						Ptpn12	0.59335	1.83574e-28
Nono	0.311283	1.25034e-148		Ldlrap1	0.312702	1.48211e-08						Myo1e	0.433088	6.04829e-117						Ctnnal1	0.608423	1.31838e-52		Eif1	0.305284	3.89514e-24						Ndufa4	0.323392	1.15814e-37						L3mbtl3	0.48393	2.45487e-28
Wdr20	0.273987	1.41179e-148		Gm37240	0.35781	1.56013e-08						Zc3h15	0.312344	1.03968e-116						Arhgef3	0.713897	1.71016e-52		Fxyd3	0.271806	6.55694e-24						Prlr	0.270784	1.21086e-37						Clk1	0.457267	2.73751e-28
Slc7a1	0.298679	6.23709e-148		Mtf2	0.447472	1.59668e-08						Usp32	0.342064	1.62144e-116						Prlr	0.284292	1.89195e-52		Fam214a	0.535771	1.80602e-23						Zfp277	0.251514	1.28039e-37						Rapgefl1	0.348555	3.91477e-28
Atg13	0.264027	6.4326e-148		Map4k5	0.358126	1.60527e-08						Acbd5	0.288806	3.59473e-116						Tmem51	0.397543	1.92638e-52		Csnk1a1	0.251702	4.63026e-23						Pgap2	0.296445	1.29046e-37						Ubtd2	0.402699	4.01542e-28
Zfp36l2	0.435507	7.58122e-148		Dicer1	0.259133	1.66813e-08						Smarca4	0.273765	6.74756e-116						Riok3	0.410602	2.28459e-52		Ascc3	0.289067	1.03865e-22						Scamp1	0.358681	1.44653e-37						Fbxw11	0.425211	4.06021e-28
Helz	0.251039	1.95032e-147		Topbp1	0.280944	1.70413e-08						Cct5	0.268395	6.7485e-116						Pak6	0.315552	2.31967e-52		Golgb1	0.278543	1.65309e-22						Bach2	0.250365	1.45012e-37						Tjp1	0.434356	4.45879e-28
Top1	0.540196	2.14229e-147		Gars	0.329624	1.76554e-08						Plekha1	0.256768	1.89509e-115						Sec61a2	0.452722	2.60301e-52		Ppp1cb	0.252893	1.88845e-22						Hmgcr	0.388044	1.46358e-37						Atf2	0.411932	4.48395e-28
Hspa9	0.400009	2.78598e-147		Taf15	0.54342	1.93513e-08						1810058I24Rik	0.274109	5.4948e-115						Plch2	0.26032	3.41847e-52		Ube2h	0.307421	4.36439e-22						Desi2	0.485966	1.47379e-37						Ralgapa1	0.332815	5.01208e-28
Lrba	0.313189	1.1672e-146		Setx	0.298074	2.12171e-08						Atp5b	0.353743	1.07912e-114						Bicdl1	0.451868	4.4018e-52		Hsp90ab1	0.289321	4.42205e-22						Dnajc21	0.272756	1.66317e-37						St14	0.294685	5.22552e-28
Ece1	0.403395	1.569e-146		Golim4	0.433117	2.12218e-08						Romo1	0.266982	2.98405e-114						Zbtb16	0.38672	4.50211e-52		Acbd5	0.26794	1.17408e-21						Pmvk	0.255179	1.69444e-37						Ap1ar	0.476834	5.41664e-28
Strn	0.275192	1.73386e-146		Odf2	0.355156	2.12315e-08						Psmb4	0.321542	3.8473e-114						Carmil1	0.46676	4.50327e-52		Nectin1	0.330814	4.01736e-21						Mdm4	0.314447	1.83849e-37						Rnf19a	0.465589	5.77543e-28
Sik1	0.362466	3.64273e-146		Atp1b3	0.567036	2.19284e-08						Fnbp1l	0.259222	5.61215e-114						Srsf3	0.443188	5.04766e-52		Acap2	0.269958	4.18563e-21						Larp1	0.347652	1.8542e-37						Hs6st1	0.307407	6.14123e-28
Bcar3	0.288932	3.66429e-146		Phrf1	0.383174	2.35859e-08						Hnrnpul2	0.301733	6.66404e-114						Timm23	0.430646	5.87329e-52		Mark2	0.307159	4.62505e-21						Snhg8	0.323428	3.108e-37						Bcl6	0.376695	6.43483e-28
Banf1	0.263534	5.2838e-146		Shroom4	0.343829	2.39129e-08						Atp1b3	0.432888	1.363e-113						Wdr45b	0.494799	5.95058e-52		Wdr26	0.37933	5.09775e-21						Prkab2	0.300062	3.27332e-37						Arid5b	0.42828	7.20661e-28
Eif1ax	0.314556	6.31169e-146		Arhgap21	0.429486	2.40958e-08						Rtf1	0.297801	6.65811e-113						Ppp1r13l	0.305751	6.50802e-52		Higd1a	0.260705	9.48276e-21						Tle4	0.492602	4.16003e-37						Rtn4	0.507423	7.41753e-28
Erc1	0.45252	8.17405e-146		Wwp1	0.265905	2.419e-08						Ndufa7	0.295058	2.79477e-112						Riok2	0.481253	7.33445e-52		Tle5	0.261043	1.19603e-20						Zc3h13	0.325831	4.36034e-37						Cdc37l1	0.440264	8.02502e-28
Ndufb10	0.303735	9.02504e-146		Cavin1	0.417862	2.56816e-08						Kdm4c	0.281311	2.98139e-112						Rnf4	0.463952	7.34767e-52		Macf1	0.327479	1.57823e-20						Bsdc1	0.36624	4.60709e-37						Dcaf5	0.440382	8.33701e-28
Tmem131	0.350445	1.22598e-145		Lrrc59	0.447043	2.69206e-08						Ndufa1	0.269599	3.84455e-112						Scaf11	0.462222	7.81186e-52		Sltm	0.356048	5.53036e-20						Ubr3	0.411752	4.80248e-37						Nfx1	0.469991	8.37537e-28
Rhot1	0.258233	1.80634e-145		Stfa1	0.598733	2.74266e-08						Vamp8	0.2645	1.3965e-111						Efl1	0.422614	7.99115e-52		Ythdc1	0.314056	3.72946e-19						Otud4	0.266483	5.24678e-37						Qk	0.497688	1.01304e-27
Med13l	0.517455	2.09807e-145		Tubb4b	0.64867	2.75434e-08						Ddi2	0.253188	3.37052e-111						Cobl	0.506105	8.79232e-52		Jun	0.329678	4.96628e-17						Arid4b	0.431463	6.5012e-37						Tom1l2	0.500108	1.20018e-27
Luc7l	0.272401	4.80819e-145		Capg	0.511576	2.91615e-08						Arpp19	0.286832	6.98439e-111						Serbp1	0.3773	9.03285e-52		Ube2k	0.252968	1.2344e-16						Ammecr1l	0.31337	7.49601e-37						Aig1	0.628734	1.35704e-27
U2surp	0.357186	6.34512e-145		Ssrp1	0.402342	3.64717e-08						Arl8b	0.332557	9.03221e-111						Gdpd2	0.258406	1.4426e-51		Dnmbp	0.298241	1.51061e-16						Acsl5	0.373485	7.54785e-37						Ttll4	0.30501	1.43252e-27
Btbd1	0.323347	9.83734e-145		Edc3	0.282959	4.03547e-08						Appl1	0.319867	9.96025e-111						Cap1	0.445207	1.93522e-51		Sdc4	0.253364	3.06477e-16						Camta1	0.363721	7.79879e-37						Pnisr	0.444179	1.59974e-27
Ankrd13c	0.293649	1.73507e-144		Coro1c	0.368763	4.08398e-08						Atp5l	0.348222	1.25563e-110						Hipk1	0.509545	2.42472e-51		Sptlc2	0.259743	1.64118e-15						Ssbp3	0.305911	1.08994e-36						Chd4	0.407878	1.99879e-27
Cnot2	0.464814	2.06145e-144		Sec61a2	0.311305	4.27328e-08						Smad1	0.298718	1.59412e-110						Srebf2	0.478196	3.09077e-51		Atad2b	0.258556	1.84076e-15						Zbtb7a	0.304382	1.31526e-36						Hnrnpdl	0.370258	2.03921e-27
Timm23	0.335829	2.15748e-144		Mgat5	0.514574	4.29662e-08						Uqcrb	0.284652	2.45116e-110						Mtf2	0.525306	3.22616e-51		Rpl23a	0.279589	6.49521e-14						Cpeb3	0.254464	1.48233e-36						Tns1	0.519985	2.05208e-27
Api5	0.281447	4.22133e-144		Spint2	0.35282	4.31644e-08						Camsap2	0.334884	9.46985e-110						Erbb2	0.335655	5.19226e-51		Eif5	0.270614	1.65829e-13						Cstb	0.745885	1.58456e-36						Tnpo1	0.418381	2.07607e-27
Tspan3	0.49009	6.62051e-144		G2e3	0.441878	4.59134e-08						Tle5	0.284161	1.29613e-109						Zranb1	0.523804	5.96716e-51		Chic2	0.290824	2.36256e-13						Plekhg3	0.260889	1.92268e-36						Ube2b	0.382812	2.59082e-27
Slc2a1	0.394786	8.52003e-144		Ghr	0.440201	4.60188e-08						Ccl27a	0.610557	3.12386e-109						Sbno2	0.502111	6.98226e-51		Twf1	0.277539	1.94997e-12						Pi4k2a	0.337975	2.83645e-36						Wwc2	0.493144	2.5933e-27
Gpr107	0.312215	8.72829e-144		Ipo11	0.274984	4.61573e-08						Hnrnpab	0.330468	1.44702e-108						Usp10	0.371683	7.61857e-51		Krt79	1.54427	6.24712e-12						Rplp0	0.431839	2.90457e-36						Kansl1l	0.317328	2.71574e-27
Dnajb1	0.410012	1.06646e-143		AW554918	0.304686	4.75803e-08						Pdlim5	0.398753	3.34285e-107						Skint6	1.00511	7.8419e-51		Piezo1	0.305314	4.03588e-11						Gpatch8	0.365463	3.0846e-36						Ep400	0.432882	2.7476e-27
Ddx42	0.320727	1.95219e-143		Stk38l	0.305841	4.88417e-08						Cpne8	0.285778	5.43148e-107						Ghr	0.708944	8.04105e-51		Lgals3	0.349346	1.90034e-08						Gpbp1l1	0.335029	3.47365e-36						Wdr20	0.492176	3.37996e-27
Aatf	0.252688	4.18631e-143		Msn	0.519879	5.12087e-08						Ubap2	0.256708	3.0917e-106						Csrp1	0.63346	8.4052e-51		Atp11b	0.366297	1.2059e-07						Anxa1	0.468882	3.52824e-36						Tbc1d12	0.500906	3.61433e-27
Perp	0.320334	4.23938e-143		Kctd1	0.254835	5.15059e-08						Actn4	0.337913	6.37311e-106						Peli1	0.620765	9.38795e-51		Trip12	0.251883	4.78967e-07						Phf20l1	0.371258	4.17123e-36						Hsf1	0.301165	3.90082e-27
Khsrp	0.266193	4.47414e-143		Wwox	0.692385	5.22401e-08						S100a11	0.275484	1.00014e-105						Gadl1	0.577467	9.84095e-51										Gan	0.286848	6.13626e-36						Lrrc1	0.436308	3.99755e-27
Rora	0.470523	4.72567e-143		Tmem167	0.360448	6.46717e-08						Cox7a2	0.316455	1.32916e-105						Ubp1	0.488949	1.11182e-50										Atg3	0.278212	6.81372e-36						Srrm1	0.359984	4.285e-27
Pls3	0.612396	5.42859e-143		Efr3a	0.409969	6.5059e-08						Cox6a1	0.322191	2.05993e-105						Sqle	0.377521	1.1282e-50										Impad1	0.271347	6.86401e-36						Srsf2	0.349298	5.43192e-27
Fmr1	0.369339	5.94547e-143		Pls3	0.45858	6.56258e-08						Sprr2a3	0.461591	3.51633e-105						Heca	0.434939	1.44511e-50										Rps5	0.464986	7.57639e-36						Dcbld1	0.451023	5.97685e-27
Hnrnpa2b1	0.444709	1.76102e-142		Trim33	0.384166	6.66411e-08						Sppl3	0.438537	1.20869e-104						Cwh43	0.35851	1.47642e-50										Ncbp1	0.271189	1.09681e-35						Tmem131	0.405021	8.02811e-27
Cox7b	0.392101	2.09929e-142		Stt3a	0.319273	6.83549e-08						Hsd17b12	0.326486	1.38073e-104						Aopep	0.543701	2.02482e-50										Rpl22	0.417667	1.33493e-35						4932438A13Rik	0.491798	1.08806e-26
Mtf2	0.269148	3.22099e-142		mt-Nd2	0.712778	7.4438e-08						Rmnd5a	0.2616	1.97626e-104						C77080	0.343468	2.63916e-50										Plekha5	0.312653	1.53412e-35						Cbfb	0.469021	1.14835e-26
Ahctf1	0.267784	3.37445e-142		Sik2	0.442394	7.55092e-08						Akap9	0.278646	2.1043e-104						Foxn2	0.490272	2.732e-50										Tnpo3	0.330128	1.68269e-35						Dab2ip	0.33573	1.19783e-26
Jup	0.25965	3.44299e-142		Dpy19l4	0.279182	7.6462e-08						Nme1	0.268102	2.57094e-104						Msi2	0.51956	2.83717e-50										Cop1	0.369478	1.69767e-35						Gnl3	0.431915	1.24575e-26
Appl1	0.393371	3.7217e-142		Csnk1a1	0.461775	7.82899e-08						Myo10	0.318146	1.0679e-103						Arhgap42	0.382234	2.96387e-50										Stxbp5	0.302963	1.80972e-35						B3galnt2	0.381958	1.30512e-26
Naa50	0.373317	5.23162e-142		Myo5a	0.29709	8.12786e-08						Csnk2a1	0.291544	1.60163e-103						Ccnl2	0.405982	3.25379e-50										Spaca6	0.290534	2.5549e-35						Itpkc	0.428675	1.31448e-26
Serpinb2	0.868725	5.30197e-142		Spaca6	0.32567	8.26734e-08						Enah	0.382578	9.71737e-103						Med4	0.344311	3.36641e-50										Zfp706	0.290922	3.34836e-35						Caprin1	0.374439	1.70611e-26
Ptgfrn	0.261722	1.13583e-141		Cpeb3	0.478252	8.5074e-08						Eif3j1	0.290581	3.95385e-102						Eif2s3y	0.453936	3.49774e-50										Pkp4	0.441821	3.77594e-35						Bptf	0.386754	1.83338e-26
Gpatch8	0.435474	1.7747e-141		Ckap4	0.442657	8.53999e-08						Tubb2a	0.254988	1.50037e-101						Prnp	0.414861	3.72261e-50										Foxn3	0.352735	3.97844e-35						Rbm27	0.484867	2.09277e-26
Rps29	0.493502	1.81721e-141		Kpnb1	0.438181	8.74293e-08						Camta1	0.28433	2.2733e-101						Zfp644	0.511557	3.76389e-50										Mtch2	0.278638	4.03244e-35						Met	0.428783	2.15642e-26
Rfc1	0.266523	2.27557e-141		Xdh	0.392625	9.25087e-08						Memo1	0.305545	4.43276e-101						Col23a1	0.46698	3.80333e-50										Atox1	0.378391	4.11125e-35						Cand1	0.412488	2.79816e-26
Zfp706	0.283853	2.8113e-141		Ttc14	0.429929	9.40762e-08						Cox6b1	0.338954	5.76116e-101						Atp2b4	0.530037	3.89412e-50										Rpl14	0.444914	4.37456e-35						Kansl3	0.444159	3.20883e-26
Kmt2c	0.493685	2.92676e-141		Bsg	0.597891	1.00134e-07						Mif	0.383428	1.13161e-100						Ahnak2	0.429599	4.0851e-50										Smarca4	0.314336	4.63099e-35						Smc1a	0.39554	3.49081e-26
Kdm3b	0.319265	3.84891e-141		Wbp1l	0.334059	1.05655e-07						Cox6c	0.326471	1.20923e-100						Katna1	0.451785	4.31172e-50										Clint1	0.458691	5.37746e-35						Sin3a	0.419379	3.60277e-26
Sf3b6	0.296087	1.20188e-140		Nucks1	0.489083	1.07284e-07						Uqcrq	0.315006	1.27861e-100						Pfkfb2	0.304861	5.97684e-50										Kdm5c	0.330956	5.94184e-35						Efna1	0.30432	3.8277e-26
Osbpl3	0.270676	1.25756e-140		Cyb5r3	0.461536	1.07524e-07						Pum1	0.391997	1.89661e-100						Akap9	0.424767	6.65598e-50										Slc6a14	0.394425	6.0044e-35						Xpo4	0.408222	4.83123e-26
Prdm10	0.26957	1.4354e-140		Pola1	0.496008	1.10267e-07						Cdk6	0.278407	4.31884e-100						Qk	0.496776	7.87399e-50										Usp15	0.342735	6.74873e-35						Fgd4	0.394063	4.8459e-26
Arl5b	0.384395	1.70208e-140		Phc2	0.29606	1.10394e-07						Pomp	0.260907	2.15895e-99						Polk	0.438939	7.89422e-50										Rel	0.402211	7.57012e-35						Trim44	0.439529	4.90653e-26
Rsf1	0.435078	2.11758e-140		Degs1	0.372349	1.12251e-07						Foxn3	0.314354	2.26145e-99						Chd1	0.450658	8.42223e-50										Chd7	0.264659	1.42935e-34						Osmr	0.421746	5.11735e-26
Atp5c1	0.387344	3.05518e-140		Nek1	0.251763	1.12899e-07						Map7d1	0.325062	2.98822e-99						Prpf4b	0.491539	1.06771e-49										Btg2	0.592874	2.05628e-34						Sept9	0.396837	7.1821e-26
Stat1	0.267417	4.53552e-140		Rabgap1l	0.570388	1.17241e-07						Dpm1	0.256531	3.64816e-99						Prep	0.416636	1.17479e-49										Plaa	0.309863	2.10361e-34						Hook2	0.296855	7.31526e-26
Cbx1	0.263868	6.91741e-140		Atp9b	0.503079	1.18135e-07						Cops9	0.263485	8.15839e-99						Tead3	0.359659	1.37317e-49										Ncoa1	0.376702	2.41919e-34						Malat1	0.296278	7.92691e-26
Tgfbi	0.302388	8.06919e-140		Socs5	0.252509	1.18632e-07						Zc3h12c	0.40536	2.22273e-98						Msmo1	0.492118	1.44963e-49										Rps26	0.399837	2.45841e-34						Axin1	0.385088	7.93123e-26
Abcf1	0.304916	1.98532e-139		Lpp	0.588607	1.22121e-07						Trip11	0.286118	2.9668e-98						Pnn	0.415204	2.11119e-49										Zbtb11	0.37652	2.81598e-34						Eps15l1	0.397135	8.81916e-26
Rangap1	0.26497	5.36524e-139		Camk2d	0.577428	1.24783e-07						Eif5b	0.326245	8.84724e-97						Jag1	0.379501	3.28318e-49										Naca	0.391173	3.46148e-34						Cul3	0.402103	8.8744e-26
Hadha	0.253429	5.67004e-139		Golga7	0.280421	1.2862e-07						Cnbp	0.298169	1.24845e-96						Stx3	0.43916	3.56083e-49										Rps8	0.423312	3.54403e-34						Pdcd4	0.380174	9.11267e-26
Zfp644	0.36193	7.85724e-139		Rarg	0.306874	1.30278e-07						Eif3e	0.309864	2.8547e-96						Cul2	0.417943	3.77135e-49										Pdxdc1	0.319178	3.56905e-34						Ogt	0.376255	9.37137e-26
Tnks2	0.429745	1.33797e-138		Afap1	0.344871	1.30653e-07						Ogdh	0.264657	1.17333e-95						Fer	0.53285	3.92865e-49										Nr6a1	0.381357	3.78714e-34						Bcl9l	0.370223	9.8363e-26
Rps6kb1	0.317946	2.51455e-138		Rpn1	0.426481	1.35004e-07						Ythdc1	0.342138	1.40152e-95						Fam91a1	0.407667	5.41871e-49										Trp53inp2	0.255917	3.95353e-34						Usp3	0.532448	1.41001e-25
Rpl22l1	0.454309	7.39089e-138		Neo1	0.30429	1.36078e-07						Rufy3	0.251176	1.64197e-95						Kdm3a	0.438806	6.04058e-49										Srcap	0.273402	4.38324e-34						Atxn7	0.442096	1.55085e-25
Hnrnpdl	0.331431	2.27938e-137		Airn	0.35387	1.36901e-07						Purb	0.281471	5.3479e-95						Ankrd35	0.379936	6.42015e-49										Llph	0.259602	4.73064e-34						Ddx42	0.46522	1.65172e-25
Hnrnph3	0.281967	3.44228e-137		Hspa4	0.628258	1.51622e-07						Dhx9	0.298224	7.16493e-95						Nktr	0.422173	7.69189e-49										Rps14	0.417753	5.20521e-34						Klf4	0.488293	1.71627e-25
Atp5o	0.352362	1.04624e-136		Homer1	0.259677	1.6432e-07						Dnajc5	0.302942	1.24617e-94						Ptcd3	0.34332	9.09303e-49										Dcun1d1	0.274159	6.0899e-34						mt-Atp8	0.360512	1.75364e-25
Zbtb11	0.364053	1.15311e-136		Idi1	0.566726	1.65736e-07						Agfg1	0.324358	3.20739e-94						Hnrnpu	0.425709	9.17103e-49										Rbm27	0.321911	6.15673e-34						Ptp4a2	0.515029	1.76836e-25
Aff1	0.528988	1.15888e-136		Lgals9	0.326949	1.70708e-07						Btg2	0.406092	6.44725e-94						Atg4b	0.403768	9.39427e-49										Rpl13a	0.434702	6.79317e-34						Ppp2r1b	0.339847	1.97694e-25
Arhgap12	0.349995	1.47609e-136		Lmna	0.504385	2.13606e-07						Rcor1	0.322557	1.49586e-93						Ankrd28	0.579172	1.25633e-48										Rsrc2	0.353963	7.88824e-34						Dop1a	0.408566	2.02309e-25
Immp2l	0.49027	1.52056e-136		Hif1a	0.558161	2.2178e-07						Flnb	0.277851	2.19959e-93						L3mbtl3	0.488446	1.31432e-48										Btbd7	0.387399	8.16507e-34						Khdc4	0.419168	2.14337e-25
Eif3b	0.258694	7.10295e-136		Dcp2	0.285598	2.26555e-07						Cox5a	0.272616	4.86616e-93						Tm9sf2	0.451919	1.46593e-48										Rrn3	0.259219	9.19018e-34						Fbxo42	0.448483	2.37563e-25
Ndufb9	0.350294	7.848e-136		Cul4a	0.290008	2.28059e-07						Atp2b4	0.292227	6.62217e-93						Hnrnph3	0.419385	1.60344e-48										Larp4	0.340035	9.86589e-34						Cyld	0.410026	2.53533e-25
Ckap2	0.276728	1.01318e-135		Supt20	0.307995	2.29527e-07						Arhgap12	0.252051	1.52788e-92						Nectin2	0.401135	1.67114e-48										Tmem245	0.283326	1.1026e-33						Gspt1	0.362528	2.54236e-25
Foxj3	0.301101	1.04572e-135		Map2k5	0.384055	2.32188e-07						Eda	0.251807	3.14263e-92						Hivep1	0.515036	1.85232e-48										Usp53	0.297107	1.30794e-33						Mfhas1	0.535646	2.57112e-25
R3hdm1	0.341323	6.53519e-135		Dusp10	0.331691	2.32937e-07						Ubn2	0.370733	5.12967e-92						Sec24b	0.457469	1.9144e-48										Mcmbp	0.272868	1.47152e-33						Clic4	0.473295	2.63279e-25
Tax1bp1	0.424764	8.92629e-135		Gpr107	0.391902	2.60857e-07						Cop1	0.347177	6.26541e-92						Sos1	0.520947	2.24978e-48										Zfp280d	0.31627	1.547e-33						Rnf216	0.443203	2.79595e-25
Arhgap32	0.262266	1.19756e-134		Ap1s1	0.274346	2.74468e-07						Arl15	0.380039	1.12537e-91						Dusp7	0.346404	2.67332e-48										Lmna	0.355606	1.61326e-33						Ago1	0.368875	4.06545e-25
Ptk2	0.296028	2.02593e-134		Cyp51	0.534744	2.87134e-07						Ppp2r5e	0.264098	1.47404e-91						Dnm1l	0.497492	2.99777e-48										Rictor	0.43885	1.8441e-33						Tnrc6b	0.354631	4.20433e-25
Nrg1	0.507125	2.38312e-134		Fars2	0.322067	3.06344e-07						Ipo7	0.25738	6.78927e-91						Pi4k2a	0.439818	3.5969e-48										Ndufs6	0.252689	2.07987e-33						Nt5dc3	0.39583	4.29368e-25
Eif3j1	0.326649	2.47085e-134		Cdc42bpb	0.367546	3.07009e-07						Itsn2	0.372945	9.2129e-91						Pdcd6ip	0.405271	3.89065e-48										Lin52	0.276096	2.22435e-33						Frmd4b	0.481535	4.49162e-25
Deptor	0.319996	3.85756e-134		Rdx	0.453263	3.13658e-07						Daam1	0.251236	7.71172e-90						Kdm3b	0.477703	3.96916e-48										Gatad2b	0.392603	2.46745e-33						Rb1cc1	0.423663	4.61314e-25
Psme4	0.479967	3.94656e-134		Mprip	0.442262	3.1431e-07						Rps27l	0.270226	9.85301e-90						Arl5a	0.463991	4.35891e-48										Tcerg1	0.32628	2.60242e-33						Ep300	0.387454	4.78853e-25
Eif3c	0.379026	3.99391e-134		Jup	0.403407	3.24193e-07						Mon2	0.304537	1.61619e-89						Hsf2	0.549959	5.73825e-48										Tob1	0.274046	2.96219e-33						Garem1	0.591535	5.2196e-25
Scyl2	0.251045	4.70054e-134		Myo10	0.480453	3.40629e-07						Eif4b	0.272234	2.89646e-89						Npas2	0.462452	6.23349e-48										Nuak1	0.286808	2.99338e-33						Brd1	0.442698	5.81317e-25
Kmt2a	0.362176	5.73508e-134		Nudt3	0.252185	3.47876e-07						Cnot2	0.344539	4.44797e-89						Plet1	0.411319	6.28636e-48										Mdh1	0.265963	3.62467e-33						Acbd5	0.49769	5.95212e-25
Stam	0.350026	6.2869e-134		Comt	0.276717	3.5782e-07						Tiparp	0.299028	4.47391e-89						Ahctf1	0.468017	7.04149e-48										Rpl8	0.42002	3.83632e-33						Ints7	0.366289	6.0445e-25
Frs2	0.385251	9.1444e-134		Alkbh5	0.298818	3.61375e-07						Ppp1cb	0.283592	1.29201e-88						Nfe2l1	0.376256	7.44346e-48										Tet3	0.353297	5.36079e-33						Appl1	0.407619	6.14417e-25
Ndufs4	0.303799	1.26321e-133		Srsf6	0.339705	3.73988e-07						Tor1aip2	0.250702	3.36872e-88						Rnf121	0.399645	7.69029e-48										March5	0.302485	6.29387e-33						Foxo3	0.414538	6.76537e-25
Tpt1	0.417356	2.39656e-133		Ktn1	0.429936	3.80538e-07						Luzp1	0.268229	3.74958e-88						F2rl1	0.314528	8.57572e-48										Cox7a2l	0.328785	6.73915e-33						Ppp2cb	0.384267	6.89353e-25
Usp14	0.253296	3.8374e-133		Ctdspl2	0.283306	3.88149e-07						Hdgf	0.271141	1.17604e-87						Lrrc4	0.38939	9.63824e-48										Tcf12	0.513324	6.81643e-33						Utp20	0.305744	7.33156e-25
Ehmt1	0.280995	5.32199e-133		Smap1	0.402831	4.22507e-07						Nrip1	0.343194	3.65145e-87						Snrnp70	0.371743	1.01041e-47										Fyttd1	0.270123	7.05988e-33						Tet3	0.396096	7.36395e-25
Cstf3	0.334995	1.09244e-132		Tulp4	0.457523	4.29975e-07						Paip2	0.284652	1.79266e-86						Bcas3	0.547181	1.422e-47										Hmgn1	0.284752	7.42614e-33						mt-Nd6	0.36589	7.5272e-25
Tcp1	0.326941	2.15013e-132		Nfx1	0.334575	4.37684e-07						Maml3	0.263955	1.83704e-86						Arid1a	0.448449	1.51252e-47										Lrch3	0.433612	7.5585e-33						Arl4a	0.393418	8.82042e-25
Mki67	0.811488	2.26437e-132		Tead1	0.414315	4.42088e-07						Dhx15	0.251926	3.76358e-86						Cept1	0.507605	1.7553e-47										9930021J03Rik	0.357149	7.58173e-33						Tent4a	0.292992	9.18443e-25
Map3k1	0.285561	2.32171e-132		Golt1b	0.255488	4.46808e-07						Nme2	0.301547	1.70698e-84						Ablim1	0.713035	1.78666e-47										Eif5a	0.346187	8.16094e-33						Camsap1	0.388004	1.13536e-24
Phactr2	0.545781	2.46854e-132		Tmem245	0.393454	4.60117e-07						Mbtd1	0.30716	3.54439e-84						Heatr1	0.350843	1.80008e-47										Mgat5	0.408114	9.66257e-33						Rock1	0.38388	1.25042e-24
Dek	0.477889	2.78767e-132		Adam10	0.433717	5.03721e-07						Smg1	0.338538	6.72011e-83						Pou2f3	0.492911	2.16137e-47										Rps20	0.40124	1.01503e-32						Sgms1	0.464505	1.25965e-24
S100a16	0.289327	5.65259e-132		Abracl	0.558963	5.12135e-07						Ube2e2	0.281202	2.1787e-81						Hacd3	0.444908	2.27983e-47										Ptprg	0.302039	1.08728e-32						Tmtc2	0.401508	1.36879e-24
Uap1	0.406426	6.13908e-132		Arhgap35	0.294294	5.12627e-07						Psmd11	0.284705	4.2766e-81						Vps37a	0.433142	2.52049e-47										Eed	0.264746	1.10355e-32						Zmym4	0.426779	1.41972e-24
Cct6a	0.295072	6.77706e-132		Utrn	0.397599	5.22359e-07						Gspt1	0.260115	7.50786e-80						Lrig2	0.416955	2.54862e-47										Il13ra1	0.380458	1.13842e-32						Rad51b	0.63931	1.45087e-24
Glrx3	0.2798	7.60964e-132		Klf5	0.290238	6.02538e-07						Bmpr2	0.311684	1.96079e-77						Frk	0.632465	2.61649e-47										Atp2c1	0.314419	1.27902e-32						Meis1	0.454616	1.60624e-24
Map1lc3a	0.26434	1.7093e-131		Uhmk1	0.288302	6.28616e-07						Cast	0.352975	4.57567e-77						Snd1	0.478079	2.88642e-47										Brd1	0.253471	1.34137e-32						Gatad2a	0.40359	1.82737e-24
Lemd3	0.374049	2.4418e-131		Kdelr1	0.404279	6.34588e-07						Pcnx	0.294645	6.66413e-77						Dsg1b	0.637878	3.16331e-47										Ctnnb1	0.306634	1.6188e-32						Arntl	0.453117	1.85239e-24
Prpf38b	0.311548	3.73522e-131		Dnaja4	0.295001	6.82491e-07						Naa50	0.253445	6.86088e-77						Cdc27	0.503784	3.29977e-47										Fam91a1	0.295252	2.09354e-32						Trp53	0.340817	2.6216e-24
Tspan5	0.499766	4.23144e-131		Smad3	0.304988	6.88644e-07						Krt16	0.676572	1.0119e-75						Ano1	0.304825	3.80894e-47										Zzz3	0.327411	2.39908e-32						2610020C07Rik	0.32528	2.62848e-24
Smarca4	0.29618	5.07344e-131		Atrn	0.276779	7.2017e-07						Srsf11	0.284127	9.27328e-75						Lrig3	0.37051	3.85843e-47										Cab39	0.339476	2.59364e-32						Aftph	0.392631	2.65633e-24
Uqcr10	0.348633	8.77938e-131		Hmbox1	0.453661	7.62222e-07						Rab6a	0.256972	9.44099e-75						Paxbp1	0.405216	4.61879e-47										Tmem43	0.309304	2.78628e-32						Desi2	0.607584	2.83585e-24
Gm10076	0.62199	9.32887e-131		Large1	0.455226	7.66634e-07						Tra2b	0.281418	1.08432e-73						Ube2b	0.405475	4.88736e-47										Gramd3	0.42484	3.18267e-32						Nfkb1	0.548555	2.96883e-24
Klc1	0.326008	1.43361e-130		Ppic	0.326532	7.85533e-07						Rc3h1	0.296929	2.38531e-73						Dctn4	0.437043	5.77485e-47										Purb	0.289409	4.25445e-32						Ppp1r13l	0.255756	3.76087e-24
Sos2	0.283069	2.30272e-130		Aqr	0.257186	7.86821e-07						Kmt2c	0.291052	3.18502e-72						Map2	1.23312	5.83714e-47										Atg13	0.272826	4.93043e-32						Lpp	0.39654	3.9779e-24
Thoc2	0.447802	1.50777e-129		Bcl11a	0.256822	8.32517e-07						Brwd1	0.269381	1.50461e-70						Qrich1	0.427315	6.7077e-47										Wac	0.38335	5.4196e-32						Qrich1	0.392888	4.29453e-24
Eif5b	0.378036	3.71682e-129		Nrip1	0.418948	9.38711e-07						Thoc2	0.294012	1.53832e-69						Phf21a	0.502817	7.86658e-47										Rpl10a	0.443614	9.9865e-32						Mycbp2	0.372107	4.89531e-24
Xpo1	0.335918	4.13072e-129		Eif4ebp1	0.423488	9.5654e-07						Cblb	0.342175	1.62105e-69						Ranbp10	0.456684	8.14517e-47										Zfc3h1	0.43131	1.02122e-31						Taf1d	0.370718	5.45935e-24
Gpbp1l1	0.275081	4.23597e-129		Synj2bp	0.302944	1.01671e-06						Erc1	0.258711	1.13518e-68						Ilf3	0.466787	9.67304e-47										Ppp1r14b	0.287277	1.11985e-31						Vezt	0.3944	5.76701e-24
Fau	0.429497	4.25442e-129		Cdc123	0.258904	1.02204e-06						Atp5g2	0.250037	2.2705e-68						Naa30	0.324581	9.81921e-47										Eif3h	0.327433	1.14579e-31						Emsy	0.465219	5.77439e-24
Uqcr11	0.360108	5.92979e-129		Psmc4	0.268643	1.04352e-06						Wapl	0.252153	3.13776e-68						mt-Nd6	0.369813	1.54678e-46										Pds5a	0.369644	1.44021e-31						Ipo5	0.389598	6.22055e-24
Dnajc8	0.298776	7.932e-129		mt-Nd6	0.362643	1.07056e-06						Ankrd11	0.276584	3.59744e-66						Cttnbp2	0.501658	1.73995e-46										Rpl6	0.413804	1.4634e-31						Ncbp1	0.306754	6.24087e-24
Atp5h	0.361531	8.31238e-129		Anks1	0.297691	1.11444e-06						Cask	0.2573	7.19947e-64						Hook2	0.28958	2.07211e-46										Sec24b	0.321565	1.496e-31						Itgb6	0.715422	6.91237e-24
Atp5k	0.30808	1.08625e-128		Tmed9	0.447532	1.14211e-06						Fubp1	0.260015	1.76984e-63						Gm49336	0.440218	2.17981e-46										Pan3	0.371743	1.57839e-31						Btbd9	0.33519	7.19404e-24
Bbx	0.325114	1.54455e-128		mt-Cytb	0.620303	1.16751e-06						Prrc2c	0.272775	2.50243e-61						Sirt1	0.77286	2.28141e-46										Ndufb11	0.275663	1.92654e-31						Map4k3	0.378282	9.70664e-24
Znrf2	0.299126	1.88355e-128		Ptbp3	0.445762	1.19493e-06						Arid4b	0.307213	2.957e-60						Zfp266	0.479818	3.81968e-46										Ubac2	0.345205	1.92785e-31						Usp25	0.41904	1.09203e-23
Rictor	0.421315	2.22035e-128		Prc1	0.549857	1.21959e-06						Ubr5	0.2635	6.18087e-57						Smurf2	0.559754	3.87372e-46										Gcnt2	0.291805	2.03054e-31						Arl5b	0.442575	1.10831e-23
Aopep	0.477804	3.57337e-128		Fbxw7	0.374376	1.26524e-06						F3	0.256431	1.36133e-53						Ube2k	0.444348	4.07169e-46										Il20rb	0.264875	2.13329e-31						Pqlc1	0.330591	1.13547e-23
Fosl1	0.336354	3.8105e-128		Pafah1b2	0.312266	1.29658e-06						Jun	0.261128	1.52468e-43						Fyttd1	0.445665	4.42039e-46										Krt77	0.472139	2.26601e-31						Socs7	0.338545	1.30399e-23
Exoc6b	0.443813	4.48208e-128		Smad2	0.394842	1.34345e-06														Slc7a6os	0.346571	4.48021e-46										Timm23	0.287282	2.28325e-31						Wee1	0.389014	1.40849e-23
Hnrnpm	0.403793	7.60012e-128		Nap1l4	0.359373	1.35772e-06														Jag2	0.306951	9.50921e-46										Hbegf	0.384625	2.76105e-31						Phf3	0.393972	1.54282e-23
Eif5a	0.402772	1.45397e-127		Snrnp70	0.403015	1.36965e-06														Sf3b1	0.41451	1.02035e-45										Ppp2r2a	0.334194	4.45781e-31						Mpzl1	0.342934	1.61457e-23
Crip2	0.28176	1.80139e-127		Nadk	0.332794	1.52881e-06														Brd8	0.403264	1.03691e-45										Kmt2e	0.370142	5.15872e-31						Ccl27a	0.807112	1.74141e-23
Ewsr1	0.374032	2.31085e-127		Traf3ip2	0.289189	1.58735e-06														Ralbp1	0.458905	1.08078e-45										Atpif1	0.320769	5.9371e-31						Rsbn1l	0.425943	1.80927e-23
Nxn	0.26314	2.43535e-126		Tkt	0.395359	1.59823e-06														Ssh2	0.597432	1.09856e-45										Sec61a2	0.25715	6.21723e-31						Cspp1	0.461177	1.81634e-23
Tmem65	0.326083	3.92629e-126		Nsd1	0.540264	1.69162e-06														Hnrnph1	0.415071	1.21057e-45										Rab18	0.250822	6.22561e-31						Smurf1	0.445427	1.85958e-23
Arid1b	0.447696	6.59799e-126		Ldlr	0.692274	1.80758e-06														Uhrf1bp1l	0.544629	1.26489e-45										Rps25	0.387162	7.69781e-31						Gtf3c1	0.322175	2.08675e-23
Smarca5	0.361658	6.75432e-126		Csnk2a1	0.410498	2.10282e-06														Srsf2	0.363655	1.28584e-45										Wapl	0.34037	9.60931e-31						Zmym5	0.397487	2.71926e-23
Ddb1	0.294066	9.45086e-126		Srpk2	0.453215	2.44791e-06														Dtx2	0.392601	1.3801e-45										Rpl19	0.384154	1.04017e-30						Ccnt2	0.413879	2.74928e-23
Usp34	0.428877	1.04281e-125		Cd9	0.411592	2.60714e-06														Car12	0.380712	1.90003e-45										Alkbh1	0.261828	1.04021e-30						Zfp532	0.407472	2.79973e-23
Arid4b	0.554439	1.67311e-125		Rcn1	0.273771	2.6164e-06														Fosl1	0.44598	2.04612e-45										Strn3	0.349011	1.13426e-30						Chka	0.496345	2.83052e-23
Ndufs6	0.250498	2.07525e-125		Gbf1	0.36587	2.66832e-06														Fam83g	0.304443	2.34392e-45										Tm9sf2	0.309325	1.26578e-30						Thap3	0.309683	2.84047e-23
Tial1	0.270358	6.14936e-125		Tent4a	0.297673	2.88466e-06														Rnf145	0.438264	2.98761e-45										Kdm5a	0.310275	1.38868e-30						Bcar1	0.314626	2.98162e-23
Rab22a	0.362447	1.65967e-124		Morf4l2	0.448164	2.93392e-06														Gnl3	0.52874	3.04796e-45										Eef2	0.420652	1.42354e-30						Mid1	0.625937	3.08299e-23
Adnp	0.267632	2.70134e-124		Snrpd3	0.25898	2.93594e-06														Brd1	0.425299	3.09617e-45										Ankrd11	0.38544	1.85549e-30						Fbrsl1	0.379031	3.31722e-23
Pum2	0.450897	3.18511e-124		Anxa1	0.643302	2.95106e-06														Smap1	0.444339	3.28722e-45										Rps13	0.400832	1.91352e-30						Etfdh	0.374389	3.58787e-23
Polr1d	0.346875	4.06269e-124		Top2a	0.633514	3.06492e-06														Gmeb1	0.436926	3.49822e-45										Sos1	0.293079	2.27107e-30						Mprip	0.329475	4.28654e-23
Atp5l	0.365991	4.15368e-124		Copb2	0.395385	3.09537e-06														Mst1r	0.297377	3.86681e-45										Stam2	0.376887	2.8152e-30						Heca	0.41335	4.39866e-23
Tlk1	0.305186	5.21533e-124		Sec24c	0.284298	3.1115e-06														Utp18	0.38836	5.72888e-45										Arid1a	0.287917	2.84768e-30						C2cd5	0.377019	4.88596e-23
Uqcrh	0.374908	5.2636e-124		Cd81	0.458168	3.11972e-06														Btbd9	0.425301	6.35716e-45										Srsf3	0.313249	3.05998e-30						Rfwd3	0.428974	4.88639e-23
Bmpr1b	0.38539	5.92169e-124		Plekhg3	0.264431	3.21654e-06														Tanc2	0.627367	7.05032e-45										Vps37a	0.26813	3.47186e-30						Fzd6	0.314117	5.52496e-23
Snrpb	0.297812	8.57062e-124		Tomm70a	0.27747	3.2267e-06														Ppp6c	0.421243	9.32189e-45										Mib1	0.364671	3.49456e-30						Celsr1	0.272377	6.0315e-23
Hnrnpul2	0.291174	9.84841e-124		Gpi1	0.518176	3.30348e-06														Mapkbp1	0.493012	9.74867e-45										Ddx10	0.269575	3.56765e-30						Vkorc1l1	0.434796	6.18398e-23
Tnpo3	0.275114	1.09479e-123		Ltn1	0.264688	3.33012e-06														Ube2n	0.456241	9.95089e-45										Sltm	0.294714	3.87808e-30						Stard5	0.329318	6.65998e-23
Rcor1	0.397521	1.34169e-123		Ywhag	0.410215	3.41271e-06														Skint3	0.916946	1.02617e-44										Zcchc7	0.371106	4.05232e-30						Akap8	0.347405	7.08771e-23
Hnrnpf	0.337954	3.86758e-123		Eps15	0.39339	3.6167e-06														Sik3	0.468379	1.06165e-44										Ube2n	0.285048	4.12769e-30						Slc6a6	0.914093	9.25325e-23
Sltm	0.352888	9.50275e-123		Ddost	0.406705	3.63158e-06														Traf3ip2	0.381356	1.10392e-44										Psme4	0.465388	4.34038e-30						Tdrd3	0.354627	9.54399e-23
Capg	0.268491	1.4897e-122		Cep350	0.357749	3.74686e-06														Cep170b	0.308703	1.24061e-44										Mllt3	0.358732	4.6222e-30						Ube2d2a	0.435595	1.04922e-22
Smc4	0.405105	3.16424e-122		Zc3h13	0.35216	3.75069e-06														Edrf1	0.308512	1.36591e-44										Rplp2	0.337667	4.76437e-30						G3bp1	0.350214	1.2293e-22
Pds5a	0.373452	4.19469e-122		Prkca	0.318494	3.78121e-06														Snx5	0.412257	1.41394e-44										Ppp4r3b	0.269304	5.7786e-30						Rsl1d1	0.335397	1.26062e-22
Nmt2	0.309338	4.77765e-122		Srsf1	0.277993	3.82772e-06														Srsf5	0.384848	1.48156e-44										Elovl6	0.579339	5.87562e-30						Gigyf2	0.467055	1.27783e-22
Rtn4	0.526909	5.39855e-122		2610001J05Rik	0.251497	3.85765e-06														Stam2	0.539152	1.70226e-44										Skp1a	0.279447	5.95346e-30						Slc25a25	0.473452	1.32427e-22
Acbd5	0.298236	3.98403e-121		Ckap2	0.316482	4.08132e-06														2900026A02Rik	0.329587	1.77872e-44										Xpr1	0.322985	6.21186e-30						Srcap	0.345976	1.43347e-22
Atp5g3	0.309933	7.58421e-121		Faf1	0.467004	4.10638e-06														Plekha6	0.395195	2.04596e-44										Rps3	0.400087	6.33856e-30						Hira	0.344736	1.43615e-22
Sar1b	0.286532	1.41867e-120		Evi5	0.275283	4.13962e-06														Pfkp	0.42563	2.19076e-44										Eif3i	0.255558	1.07834e-29						Bok	0.394331	1.51784e-22
Anp32e	0.255857	1.80533e-120		Magt1	0.394421	4.24183e-06														Krt5	0.453061	2.73665e-44										Smg1	0.3085	1.35297e-29						Khdrbs1	0.454652	1.58665e-22
Ssb	0.334649	1.81414e-120		Luzp1	0.499845	4.42883e-06														Nfatc3	0.47737	2.85715e-44										Tcf20	0.313598	1.54382e-29						Tob1	0.318979	1.6077e-22
Memo1	0.368021	9.67031e-120		5330438D12Rik	0.269659	4.44207e-06														Uck2	0.546649	3.59603e-44										Dnajb1	0.323981	2.01072e-29						Hmbox1	0.435442	1.62227e-22
Foxn3	0.362066	9.76842e-120		Dstyk	0.269996	4.57227e-06														Rbfox2	0.433185	4.71454e-44										Acvr1	0.288513	2.24683e-29						Lmo7	0.605198	1.78103e-22
Faf1	0.357393	1.54242e-119		Rpn2	0.327033	4.59665e-06														Zfp280d	0.451025	4.7727e-44										Cox8a	0.338282	2.83881e-29						Fnbp4	0.40521	1.95115e-22
Fam120a	0.341329	3.6597e-119		Clcn3	0.416113	5.0037e-06														Eif4g1	0.378552	5.15031e-44										Gpc4	0.409189	2.88663e-29						Ddx3x	0.369707	2.13017e-22
Ralbp1	0.357493	6.69445e-119		Rbbp8	0.509399	5.06993e-06														Tmprss11f	0.843715	5.85114e-44										Mtdh	0.28535	3.18573e-29						Fam83g	0.291329	2.24297e-22
Dcun1d5	0.263938	6.7431e-119		Rab18	0.360416	5.10791e-06														Bcl6	0.32145	5.98495e-44										Map3k8	0.335051	3.40773e-29						Arhgef11	0.372662	2.37023e-22
Nrip1	0.468795	1.05145e-118		Kif1c	0.295901	5.31006e-06														Man1a2	0.468948	6.58167e-44										Arid2	0.254947	3.4856e-29						Esco1	0.361665	2.64238e-22
Chchd3	0.250734	4.17324e-118		S100a11	0.726146	5.32445e-06														Mob1b	0.418252	7.98556e-44										Csnk2a1	0.288785	3.51917e-29						Brd8	0.397514	2.7091e-22
Gsk3b	0.423129	6.75085e-118		Csnk1g2	0.308999	5.33205e-06														Lmo7	0.759091	8.23837e-44										Ptpn11	0.261276	3.51981e-29						Acsl4	0.637329	2.75424e-22
Ppp2r5e	0.31748	7.7825e-118		Smarca4	0.369615	5.37837e-06														Stx12	0.431997	8.75438e-44										Rps2	0.418367	3.66909e-29						Mfn1	0.376953	2.93313e-22
Sdc1	0.303659	1.49812e-117		Ostc	0.388184	5.38376e-06														Lypd3	0.372981	9.52695e-44										Daam1	0.266393	3.9713e-29						Faf1	0.424171	2.96233e-22
Rheb	0.342831	2.05571e-117		Dnm1l	0.304529	5.51703e-06														Calm2	0.538856	9.82087e-44										Frs2	0.305114	4.19256e-29						Atp1a1	0.348177	3.12595e-22
Calm2	0.477782	6.34445e-117		Rbp1	0.260261	5.55372e-06														Tnfaip8	0.435804	1.22074e-43										Rpl29	0.402749	4.77463e-29						Sbno1	0.327345	3.25159e-22
Prnp	0.305587	6.39529e-117		Rnf169	0.329432	5.65182e-06														Hipk3	0.465515	1.28931e-43										Usp7	0.27026	4.96029e-29						Adamts1	0.712424	3.7907e-22
Evi5	0.278487	8.22216e-117		Mapkap1	0.296705	5.83034e-06														Ino80d	0.426381	1.2909e-43										Dync1li1	0.283399	6.66932e-29						Bckdhb	0.31985	4.3171e-22
Hnrnpc	0.427943	1.38403e-116		G3bp2	0.317218	5.86293e-06														Rab1a	0.385026	1.37823e-43										Atp5o	0.272103	6.87925e-29						Atf6	0.522941	4.36044e-22
Rbfox2	0.268308	1.54339e-116		Tsen34	0.25366	5.92224e-06														Eif4a2	0.411321	1.76522e-43										Cdc73	0.268409	7.95008e-29						Btg3	0.457091	4.73385e-22
Eps15	0.388978	2.43581e-116		Uggt1	0.265129	6.00588e-06														Atxn3	0.409422	1.79197e-43										Kdm2a	0.278388	1.13058e-28						Trappc10	0.339415	5.13693e-22
Pbx1	0.401537	4.80671e-116		Hmgcs1	0.944991	6.07545e-06														Adss	0.622978	1.88154e-43										Rpl31	0.358929	1.13197e-28						Foxo1	0.404073	5.22151e-22
Anxa7	0.338562	5.31143e-116		Ppp4r1	0.274946	6.56943e-06														Gatad2a	0.472566	1.9636e-43										Ncoa6	0.300073	1.17722e-28						Arhgap24	0.693005	5.68176e-22
Sipa1l3	0.252005	5.55612e-116		Ctnna1	0.343967	6.69871e-06														Cdh13	0.82454	1.96911e-43										Tubb4b	0.293375	1.30845e-28						Tulp4	0.345896	6.04788e-22
Csnk1g1	0.343723	8.36472e-116		Relch	0.328183	6.72397e-06														Naa16	0.437969	2.21424e-43										Rpl32	0.43277	1.51402e-28						Styx	0.397522	6.07365e-22
Sarnp	0.269138	9.31816e-116		Iffo2	0.294343	7.56048e-06														Ap1s3	0.385228	2.47197e-43										Ezh2	0.289876	1.91959e-28						Ubr2	0.386268	6.48802e-22
Fhit	0.483062	1.52959e-115		Eif2s1	0.296321	8.68405e-06														Ncbp1	0.348944	2.56711e-43										Ywhaz	0.307822	2.25209e-28						Arhgap12	0.431858	6.65357e-22
Cbx5	0.276102	1.72493e-115		Msi2	0.438199	8.73046e-06														Tbc1d2	0.265841	3.4946e-43										Rack1	0.385582	2.33621e-28						Ipo8	0.336448	7.01845e-22
Acin1	0.304983	2.00201e-115		Lrba	0.367093	8.80628e-06														Mfsd6	0.450811	3.54397e-43										Cpsf6	0.2766	2.34781e-28						Map4	0.559429	7.20857e-22
Pabpn1	0.305867	3.05421e-115		Asxl2	0.311076	9.21468e-06														Lpp	0.382555	3.70464e-43										Kansl1	0.376475	2.38518e-28						Nr1d2	0.388761	7.43925e-22
Srp72	0.260208	4.44033e-115		Kat6b	0.471671	9.24675e-06														A930015D03Rik	0.385801	4.01306e-43										Stat3	0.403487	2.43918e-28						Ncoa6	0.40145	7.81058e-22
Psmb1	0.305304	6.18369e-115		Cnn2	0.354264	9.39721e-06														Nrd1	0.376339	4.06685e-43										Sumo1	0.32794	2.66081e-28						Snrnp48	0.419114	1.02188e-21
Srrm1	0.322175	6.23389e-115		Dipk1a	0.279818	9.83039e-06														Focad	0.401175	4.30535e-43										Rps4x	0.397975	2.76843e-28						Nfrkb	0.296974	1.0233e-21
Mtus1	0.309079	1.19536e-114		Sec24d	0.264338	9.92679e-06														Syncrip	0.4249	5.33469e-43										Rpl28	0.391988	3.06898e-28						Ctif	0.480475	1.11894e-21
Sfpq	0.350111	3.64157e-114		Slc9a1	0.399471	1.06295e-05														Mllt10	0.487453	5.98172e-43										Eif4g1	0.294363	3.68805e-28						Pnn	0.295121	1.21934e-21
Lrch3	0.420035	6.31841e-114		Sppl3	0.42557	1.07069e-05														1810013L24Rik	0.455928	7.31196e-43										Acaca	0.259627	4.03521e-28						Dnmt3a	0.38267	1.24215e-21
Srsf2	0.27773	1.76703e-113		Senp5	0.330609	1.08236e-05														Nasp	0.468635	7.69024e-43										Rps10	0.373849	4.44275e-28						U2surp	0.393194	1.291e-21
Ipmk	0.27302	4.21577e-113		Sec31a	0.327895	1.09282e-05														Tmem41b	0.384013	1.0486e-42										Nfix	0.263952	4.59269e-28						Osbpl5	0.310814	1.44516e-21
Cox7a2	0.336539	7.8432e-113		Tspan14	0.277793	1.12271e-05														Ubqln1	0.364036	1.82636e-42										Baiap2	0.254556	5.72498e-28						Epc1	0.420582	1.49041e-21
Sdc4	0.435732	1.78315e-112		Lims1	0.407233	1.1621e-05														Pik3ca	0.401158	1.86856e-42										Nup153	0.289637	6.08044e-28						Arglu1	0.323078	1.85705e-21
Agfg1	0.391293	3.4986e-112		Ankib1	0.337264	1.2476e-05														Zfp800	0.425867	2.161e-42										Bmt2	0.278056	6.3547e-28						Tapt1	0.374017	1.95107e-21
Zfp148	0.330107	3.9064e-112		Rbfox2	0.421924	1.31855e-05														Gtf2ird1	0.378635	2.41952e-42										Tulp4	0.302932	7.40255e-28						Ccnl2	0.329207	2.45903e-21
Top2a	0.767486	6.41669e-112		Tasor	0.370342	1.35606e-05														Epn2	0.398148	2.85379e-42										Ddx42	0.250946	8.27451e-28						Ube2j1	0.484738	2.65844e-21
Golga4	0.336588	8.78675e-112		Smc6	0.312167	1.41191e-05														Parp8	0.673858	2.90895e-42										Nsa2	0.338516	1.21497e-27						D230025D16Rik	0.415292	3.09244e-21
Purb	0.318515	2.86814e-111		Nlk	0.259393	1.44024e-05														Nxf1	0.331024	3.02606e-42										Agfg1	0.337741	1.36863e-27						Sf3b1	0.311189	3.24192e-21
Fto	0.334458	4.5184e-111		Nckap1	0.410826	1.44857e-05														Galnt18	0.451922	4.30796e-42										Rps23	0.386722	1.64829e-27						Crebrf	0.392701	3.28101e-21
Khdrbs1	0.324677	4.64445e-111		Gapdh	0.712976	1.4499e-05														Csde1	0.338368	4.9049e-42										Rps24	0.361651	1.68997e-27						Nudt4	0.267631	3.62129e-21
Kpna1	0.271083	6.19407e-111		Ankrd17	0.459471	1.47156e-05														Spint1	0.260562	5.64523e-42										Smg6	0.309743	1.71333e-27						Cep57	0.307334	4.51375e-21
Ambra1	0.422454	6.28252e-111		Cfdp1	0.328598	1.74271e-05														Abcd3	0.415252	5.89482e-42										Dennd4c	0.35494	1.7277e-27						Skp1a	0.453543	4.53336e-21
Tubb4b	0.359975	2.16547e-110		Pdcd6	0.265297	1.75422e-05														Slc30a4	0.456858	6.54422e-42										Rpl23	0.356938	1.89123e-27						Rhot1	0.370315	5.00035e-21
H2-Q7	0.252725	4.43845e-110		Sec61a1	0.331848	1.77578e-05														Map3k7	0.4417	6.90115e-42										Maml3	0.310162	2.25612e-27						Upf3b	0.331979	5.06904e-21
Mapk8	0.27963	7.1517e-110		Tm9sf3	0.406281	1.85674e-05														Mpp5	0.484324	6.94732e-42										Shoc2	0.265703	2.2943e-27						Lnpk	0.438785	5.48452e-21
Smc6	0.253096	1.09772e-109		Mfsd14a	0.269039	1.91953e-05														Atp11a	0.436248	7.22934e-42										Arl15	0.319281	2.59162e-27						Rab11fip3	0.390812	6.56025e-21
Gigyf2	0.331001	1.15784e-109		Rap1gds1	0.31278	2.0038e-05														Hdgfl3	0.438263	7.67055e-42										Cadm1	0.263003	2.67688e-27						Tex30	0.286257	6.66163e-21
Syncrip	0.331696	1.2067e-109		Rangap1	0.290004	2.13898e-05														Limch1	0.433559	8.25595e-42										Cox7c	0.353544	2.92603e-27						Ubr4	0.369892	6.76736e-21
Rad21	0.308218	1.35833e-109		Stk39	0.350741	2.43891e-05														Mapk8	0.442136	8.28249e-42										Ino80	0.298582	3.08751e-27						Ip6k1	0.295864	6.78671e-21
Actr3	0.394836	2.18097e-109		Serpinb5	0.31685	2.47219e-05														Cdk13	0.432217	9.01896e-42										Chchd3	0.284853	3.49646e-27						Supt6	0.324009	7.30666e-21
Nsd2	0.300729	2.47873e-109		Fgfr2	0.408522	2.5317e-05														Snrnp48	0.382852	9.55195e-42										Eea1	0.300013	3.55373e-27						Phf12	0.321514	8.01928e-21
Hnrnpa1	0.294509	6.17771e-109		Tubb5	0.519079	2.8672e-05														Hipk2	0.392494	1.10281e-41										Rpl21	0.369975	3.64045e-27						Klf5	0.342386	8.09648e-21
Cdc27	0.261991	7.57878e-109		Parp8	0.344436	2.913e-05														Arpc1a	0.411293	1.13458e-41										Adam10	0.394994	3.64477e-27						Zfp740	0.277228	8.46472e-21
Cdv3	0.271888	9.02226e-109		Atg10	0.260138	3.03294e-05														Sbno1	0.411906	1.2057e-41										Bdp1	0.280934	3.84429e-27						Usp48	0.284513	9.13795e-21
Cox6c	0.340721	1.39361e-108		Chchd3	0.34817	3.06651e-05														Prom2	0.260717	1.62809e-41										Ndufb5	0.254888	4.21779e-27						Slain2	0.451182	1.04408e-20
Ran	0.315001	1.41594e-108		Nedd4	0.370866	3.09901e-05														Pdzd2	0.379534	2.49682e-41										Usp24	0.30268	4.88661e-27						Prkch	0.33265	1.12052e-20
Wdr45b	0.25085	1.49308e-108		Srp72	0.382435	3.19675e-05														Oxct1	0.399269	2.54764e-41										mt-Atp6	0.297887	8.04495e-27						Rcl1	0.331719	1.21908e-20
Aftph	0.270862	2.25484e-108		Cblb	0.497375	3.20815e-05														Ext1	0.519015	2.73861e-41										Rpl36	0.39884	9.00971e-27						Hnrnpl	0.334235	1.27995e-20
Hint1	0.340701	3.7401e-108		Mllt3	0.337109	3.24379e-05														Rsbn1l	0.424307	2.91325e-41										Acly	0.266034	9.20201e-27						Nectin1	0.263879	1.34464e-20
Timm13	0.251726	5.75455e-108		Usp24	0.39806	3.37803e-05														Sertad2	0.535464	3.00257e-41										Nipbl	0.324305	1.03185e-26						Ss18	0.355063	1.35294e-20
Cycs	0.259586	1.24936e-107		Cstf3	0.300533	3.60312e-05														Smarca4	0.382118	3.32056e-41										Mprip	0.272371	1.24732e-26						Dis3l2	0.470564	1.39246e-20
Zfp91	0.298235	3.93145e-107		Tm9sf4	0.284043	3.64276e-05														Pcyt2	0.325667	3.59415e-41										Rufy3	0.271993	1.28566e-26						Dgkd	0.291346	1.57242e-20
Mrfap1	0.26906	5.54721e-107		Picalm	0.437541	3.77922e-05														Qser1	0.462042	3.70731e-41										Eef1b2	0.380035	1.65298e-26						Itprid2	0.363728	1.63233e-20
Pkn2	0.325539	7.2752e-107		Pak2	0.353146	3.84861e-05														Shb	0.483172	3.87405e-41										Rps27	0.363248	1.83645e-26						Naa25	0.329338	1.73588e-20
Htt	0.286997	8.77948e-107		Stimate	0.263616	3.95384e-05														Ccser2	0.526767	4.35479e-41										Cfl2	0.36088	1.89147e-26						Kif16b	0.347854	1.95879e-20
Btaf1	0.323467	1.04644e-106		Kdm4b	0.25403	4.36182e-05														Zfp207	0.367671	4.55389e-41										Gsdmc	0.292987	1.92043e-26						Suz12	0.385895	2.07797e-20
Katnbl1	0.252302	1.47146e-106		Bnip3l	0.409057	4.53799e-05														Etfdh	0.386296	5.41087e-41										Ppp2r3a	0.283694	2.02469e-26						Hs2st1	0.67607	2.59962e-20
Large1	0.408067	2.2178e-106		Selenos	0.291081	4.63649e-05														Homer2	0.727933	6.09077e-41										Sgms1	0.31506	2.07366e-26						Ythdf2	0.360884	2.62667e-20
Fam49b	0.357063	3.03221e-106		Tbc1d12	0.333793	4.65853e-05														Hr	0.288854	7.12026e-41										Rpl36al	0.305251	2.28225e-26						Deptor	0.444425	2.63489e-20
Tspo	0.312712	9.308e-106		Dennd2c	0.344637	5.04686e-05														Rab14	0.363797	7.15435e-41										Setd5	0.32711	2.86637e-26						Vps37a	0.380878	2.97945e-20
Tlk2	0.315052	1.38254e-105		Hnrnpul1	0.250693	5.15181e-05														Esco1	0.344667	7.80333e-41										Trim33	0.284281	3.2787e-26						Rbbp7	0.312017	3.32832e-20
Myo1b	0.389084	3.1045e-105		B4galt1	0.397345	5.20568e-05														Tnfaip3	0.4552	8.10537e-41										Larp4b	0.313185	4.07898e-26						Plxdc2	0.289739	3.60873e-20
Asap1	0.486802	3.58599e-105		Cbx1	0.275302	5.40813e-05														Sema3f	0.267674	8.68564e-41										Thoc2	0.348507	4.46707e-26						Ube3c	0.366587	3.96934e-20
Sf3b2	0.258801	6.14053e-105		Actr2	0.420868	5.50905e-05														Slc7a6	0.452758	9.51629e-41										Tnks2	0.313481	4.48966e-26						Lrig2	0.327074	4.03857e-20
Huwe1	0.397043	1.03221e-104		Atl3	0.300273	5.6614e-05														Pak1	0.43126	1.08618e-40										Srsf11	0.315841	4.87119e-26						Limk2	0.301256	4.05262e-20
Pacs1	0.320896	1.88085e-104		Tbca	0.411601	5.66732e-05														Kazn	0.374283	1.09245e-40										Xrn2	0.313115	5.70676e-26						March6	0.360122	4.15112e-20
Ube3a	0.287459	1.9536e-104		Wdr70	0.305468	5.86185e-05														Bcas2	0.377753	1.13041e-40										Prpf38b	0.273873	6.06122e-26						Selenoi	0.415578	4.9628e-20
Gm47283	0.359887	3.11351e-104		Mrps6	0.267684	6.06081e-05														Gnl2	0.354065	1.14352e-40										Ube2e2	0.3398	6.18369e-26						Siah1a	0.326248	5.87435e-20
Gramd3	0.266029	4.29437e-104		Il4ra	0.431721	6.42097e-05														Phldb3	0.277119	1.28816e-40										Hmbox1	0.268155	6.31143e-26						Hmgb1	0.410736	6.57338e-20
Parp8	0.38667	1.04191e-103		Ap2s1	0.364165	6.43547e-05														Eif2s2	0.353497	1.82949e-40										Usp32	0.282598	7.41404e-26						Hspa9	0.331975	7.66905e-20
Tiparp	0.365084	2.03259e-103		Ube2g1	0.309269	6.58218e-05														Ep400	0.45909	2.52746e-40										Wdr44	0.291104	8.32581e-26						Phkb	0.340456	8.17809e-20
Wwc2	0.265576	2.28819e-103		Epb41l4a	0.322314	6.7891e-05														Firre	0.267984	3.07342e-40										Atp5b	0.291455	9.16643e-26						Kpna1	0.432438	8.48421e-20
Baz2a	0.265458	5.02979e-103		Igf2bp2	0.40732	7.0037e-05														Cand1	0.347796	3.1074e-40										Arl5a	0.268671	9.50889e-26						Lima1	0.461514	9.11016e-20
Mif	0.348826	7.43378e-103		Akap9	0.3427	7.36056e-05														Lcor	0.424101	4.05271e-40										Elf1	0.308769	9.53959e-26						Mapk8	0.421364	9.42256e-20
Rreb1	0.301076	1.82412e-102		Exoc6b	0.485144	7.98352e-05														Vopp1	0.434077	4.33796e-40										Abhd2	0.264353	1.05071e-25						Ptch1	0.3812	9.82095e-20
Dstn	0.269809	3.96872e-102		Psmd1	0.30824	8.35187e-05														Rnf111	0.435666	4.90145e-40										H2-Q7	0.298114	1.52498e-25						Khsrp	0.312674	1.09117e-19
Fxr1	0.293866	4.22198e-102		Vti1a	0.399763	8.4896e-05														Tbc1d12	0.471331	5.83515e-40										Rps15a	0.371721	1.63899e-25						Brd4	0.315532	1.11219e-19
Cox7a2l	0.336145	1.40189e-101		Fbxl17	0.413075	8.53473e-05														Ythdf2	0.388727	7.51032e-40										Fus	0.313596	1.6403e-25						Vps54	0.359541	1.17314e-19
Phip	0.343609	2.41966e-101		Ube2n	0.350273	8.53904e-05														Zfp750	0.38265	7.88143e-40										Rpl7a	0.32221	2.24032e-25						Schip1	0.457701	1.26166e-19
Adam10	0.379618	3.3651e-101		Tbc1d1	0.279258	9.32519e-05														March6	0.368304	9.58684e-40										Rps27a	0.338575	2.75452e-25						Cab39	0.405012	1.26828e-19
Prpf40a	0.319932	9.02158e-101		Uck2	0.405722	9.38628e-05														R3hdm1	0.497328	1.01459e-39										Gnai3	0.299291	3.38038e-25						Braf	0.405757	1.29554e-19
Anxa1	0.456556	1.51212e-100		Nipa2	0.300473	9.71051e-05														Tmprss13	0.27921	1.01461e-39										Rab14	0.289725	3.52374e-25						Tcea1	0.287317	1.58434e-19
Mrpl52	0.276234	3.77356e-100		Dnajc5	0.345035	9.78238e-05														Moxd1	0.320152	1.06123e-39										Pfdn5	0.273146	4.14389e-25						Eif4a2	0.284659	1.60883e-19
Mt1	0.340851	4.83069e-100		Cab39	0.319468	9.8006e-05														Tnks1bp1	0.347121	1.08562e-39										Ndfip2	0.276065	5.51481e-25						Zc3h7a	0.35309	1.61186e-19
Higd1a	0.272416	5.12925e-100		Hdlbp	0.408047	9.88229e-05														Ccnt1	0.431622	1.08583e-39										Car12	0.384371	6.3053e-25						Nrg1	1.73941	1.63543e-19
Smc2	0.381899	6.74101e-99		Foxk1	0.374867	9.9491e-05														Gab1	0.40224	1.091e-39										Rpl9	0.377367	6.39817e-25						Zcchc14	0.316359	1.70306e-19
Eif3a	0.334511	9.5731e-99		Anp32b	0.4129	0.00010036														Fam120a	0.417252	1.22603e-39										Sec62	0.264823	7.26874e-25						Thoc2	0.411926	1.7402e-19
Elf1	0.348592	9.70419e-99		Luc7l2	0.441585	0.000104186														Lin54	0.359393	1.23487e-39										Tanc2	0.422689	7.42957e-25						Herc3	0.287761	1.87905e-19
Ube2g1	0.347612	1.8681e-98		Pcm1	0.321684	0.000105093														Dgcr2	0.347518	1.59574e-39										4930523C07Rik	0.308691	7.47929e-25						Scamp1	0.323694	1.92592e-19
Snd1	0.310777	1.07617e-97		Selenoi	0.301334	0.000105714														Fbxo34	0.369076	1.8703e-39										Smap1	0.270864	7.57452e-25						Ddi2	0.347146	1.93288e-19
Srsf11	0.331768	1.20537e-97		Arhgef11	0.252253	0.000109045														Gmeb2	0.382808	1.88637e-39										Eif3c	0.2594	8.12637e-25						Retreg3	0.36494	2.04274e-19
Zcchc7	0.350176	1.22481e-97		Tbrg1	0.253271	0.000109679														Wipi2	0.376676	1.97766e-39										Uba52	0.310051	1.00586e-24						Srsf1	0.286743	2.04292e-19
Ccser2	0.283066	1.52157e-97		Cask	0.454354	0.000111972														Wsb1	0.393406	2.19702e-39										Zfand6	0.291293	1.03165e-24						Pprc1	0.317228	2.0704e-19
Cpeb3	0.259588	2.37525e-97		Tuba1c	0.504942	0.000113618														Eml4	0.425948	2.25991e-39										Rsf1	0.314322	1.10178e-24						Trim24	0.42739	2.44603e-19
Atp5d	0.294051	2.66967e-97		Mea1	0.27715	0.000132376														Maco1	0.419834	2.97702e-39										Pdlim5	0.290488	1.20578e-24						Luc7l	0.358785	2.83528e-19
Lmna	0.398676	5.25557e-97		Rab10	0.408621	0.000132763														Actr1a	0.384988	3.94776e-39										Ino80d	0.250782	1.44714e-24						Tshz1	0.330513	3.31443e-19
Rb1cc1	0.339691	1.6176e-96		Snrpd1	0.254257	0.00013633														Jmy	0.342343	4.02565e-39										Atp13a3	0.347763	1.93663e-24						Msh3	0.281722	3.46257e-19
Clock	0.294927	1.6885e-96		Slc35b1	0.250532	0.000138314														Gtpbp4	0.373175	4.07452e-39										Scd1	0.709645	2.04376e-24						Ncoa2	0.425355	3.51795e-19
Cab39	0.302013	2.52648e-96		E2f3	0.25104	0.000146357														Slc20a2	0.442581	4.39212e-39										Prdx2	0.253817	2.28356e-24						Rab14	0.287702	3.94248e-19
Gpx1	0.300176	3.02498e-96		Hnrnpa3	0.445225	0.000147176														Supt16	0.394732	5.2036e-39										Psmd11	0.30135	2.57772e-24						Cers5	0.37231	4.26001e-19
Atp5j	0.281817	7.68658e-96		Rad23b	0.387793	0.000150805														Xpo1	0.470093	6.99375e-39										Tmprss11f	0.405675	3.23746e-24						Ssb	0.318122	4.2918e-19
Gatad2b	0.314169	8.31695e-96		P4hb	0.450029	0.00015266														Fhl2	0.51345	6.9946e-39										H3f3a	0.277785	6.54618e-24						Cbx1	0.324219	4.3646e-19
Atp5g2	0.291953	1.03171e-95		Clock	0.42775	0.000154672														Prkch	0.360945	7.13558e-39										Arid1b	0.308591	6.95711e-24						Ube2k	0.351813	4.54923e-19
Rbm3	0.329766	2.45533e-95		R3hdm1	0.373621	0.000155161														Phrf1	0.32073	7.19179e-39										Ncor1	0.270963	6.98712e-24						Naa50	0.319536	5.15931e-19
Smap1	0.275371	4.059e-95		Zmym4	0.325285	0.000158718														Cfl2	0.388595	8.48219e-39										Rpl35a	0.329048	7.6963e-24						Rmnd5a	0.311929	6.17329e-19
Ppp2r2a	0.307573	4.38773e-95		Psmd14	0.299987	0.000160413														Bmt2	0.497537	8.49459e-39										Gsk3b	0.288781	9.27546e-24						Rab3gap1	0.332185	6.32508e-19
Hist1h1b	0.92737	1.49133e-94		Maml3	0.364684	0.00016779														Kmt2a	0.484637	9.22257e-39										Cnot4	0.320179	9.67342e-24						Ggnbp2	0.340784	6.76112e-19
Adamts1	0.433497	1.85827e-94		Scaf11	0.366827	0.000174364														Prdm10	0.337379	1.09604e-38										Ptms	0.258642	9.93774e-24						Kcmf1	0.376667	6.92504e-19
Brwd1	0.296944	2.67634e-94		Mast2	0.275366	0.000190171														Bsdc1	0.423227	1.11723e-38										Chd4	0.286267	1.04275e-23						Mtus1	0.454154	7.19602e-19
Rpl38	0.370691	2.80879e-94		Baz1b	0.353791	0.000191824														Ttc14	0.388657	1.31505e-38										Cpe	0.509087	1.37416e-23						Lmna	0.318612	7.57358e-19
Nme2	0.330318	2.84367e-94		Stag1	0.416203	0.000193768														Pde4b	0.528492	1.45146e-38										Map4k5	0.255314	1.97581e-23						Sik3	0.341524	9.66832e-19
Postn	0.284602	2.86894e-94		Xpo1	0.313755	0.000194293														Naa20	0.386073	1.61882e-38										Rab5a	0.273888	2.25841e-23						Cdip1	0.304479	9.7205e-19
Rad23b	0.27572	5.41062e-94		Spire1	0.424363	0.000198353														Rhod	0.336871	2.16372e-38										Uqcrh	0.261701	2.77576e-23						Nlrc5	0.479861	9.78177e-19
Cox5a	0.254365	8.31581e-94		Ipo9	0.265165	0.000216078														Sc5d	0.31431	2.31835e-38										mt-Co3	0.261292	3.7677e-23						Rev1	0.360992	1.04381e-18
Vapa	0.340629	9.41201e-94		Tram1	0.291723	0.000226617														Phf3	0.378509	2.32858e-38										Rps11	0.358188	3.97978e-23						Man1a2	0.381776	1.06752e-18
Yy1	0.267178	1.12115e-93		Cbx3	0.250415	0.00022969														Ppp4r2	0.418346	3.31236e-38										Kcmf1	0.294025	4.79369e-23						Irf6	0.266554	1.07856e-18
Atxn1	0.470271	2.1338e-93		Zfp654	0.29457	0.000238147														Skint1	0.314835	3.52305e-38										Ankrd17	0.366563	5.62843e-23						Lnx2	0.350958	1.13006e-18
Ncoa2	0.337002	2.36916e-93		Ss18	0.298708	0.000244272														Fam193a	0.462941	3.62047e-38										Sptlc2	0.287664	1.01766e-22						Cdc42ep3	0.334203	1.2461e-18
Scaf8	0.26012	3.34144e-93		Dut	0.26733	0.000247863														8030462N17Rik	0.337438	4.06832e-38										Cnot6	0.255025	1.39991e-22						Slc7a6os	0.343623	1.27448e-18
Desi2	0.333201	7.65626e-93		Bzw1	0.372316	0.000250502														Atp6v1h	0.444062	4.97065e-38										Zdhhc20	0.306721	1.55087e-22						Zbtb2	0.411246	1.29634e-18
Birc6	0.320692	2.29469e-92		Ogt	0.465187	0.000254417														Dcun1d4	0.313838	5.67493e-38										Rpl27a	0.318911	2.22249e-22						Cdkal1	0.393756	1.70195e-18
Pcna	0.255556	4.63528e-92		Cbfb	0.381918	0.00026061														Smyd3	0.624803	5.99679e-38										Pkn2	0.26927	2.57516e-22						Srpk1	0.272286	1.71568e-18
Tsc22d2	0.331272	5.87303e-91		Ncapg2	0.403005	0.000263989														Zmym2	0.418714	8.2324e-38										Itpr2	0.276525	2.67293e-22						Mfsd14a	0.317656	1.89141e-18
Cnot4	0.376921	1.64529e-90		Cdkal1	0.337909	0.000264165														Rab5a	0.397356	9.27152e-38										Prrc2c	0.312203	3.0953e-22						Ppm1g	0.325701	1.90256e-18
Scaf11	0.266756	4.17349e-90		Znrf3	0.29653	0.000269848														Uchl3	0.397488	1.02551e-37										Ube2b	0.257719	3.69312e-22						Btbd1	0.396469	2.18455e-18
Dnajc5	0.268447	2.78782e-89		Ssr2	0.258427	0.000278371														Tmem161b	0.323701	1.19518e-37										Zc3hav1	0.282546	4.31664e-22						Kdm5c	0.380273	2.39363e-18
Pcgf5	0.259859	6.6855e-89		Tlk1	0.44609	0.000279026														Cacul1	0.35786	1.66964e-37										Ecpas	0.269938	5.9372e-22						Papola	0.317898	2.44004e-18
Glud1	0.260581	1.23503e-88		Rab28	0.267397	0.000294496														Ddr1	0.283467	1.90591e-37										Klhl7	0.252995	7.20143e-22						Kremen1	0.361385	2.49249e-18
Caprin1	0.274082	4.04261e-88		Scd2	0.315722	0.000321649														Ptpn11	0.363961	2.78725e-37										Rpl18	0.336121	7.30081e-22						Srsf6	0.294589	2.60242e-18
Mon2	0.27716	2.6855e-87		Ywhah	0.343813	0.000322363														Asxl2	0.410147	2.91606e-37										Rpl18a	0.340577	8.77709e-22						Src	0.276519	2.78461e-18
Ybx1	0.324457	3.02568e-87		Robo1	0.303907	0.000330199														Adrb2	0.295508	3.17776e-37										Cox5b	0.253594	9.75846e-22						Mtdh	0.334637	2.95678e-18
Bhlhe40	0.26571	4.11805e-87		Zmynd8	0.324989	0.00034653														Tdrd3	0.414366	3.64933e-37										Btf3	0.283149	1.16601e-21						Rbm10	0.270317	3.08708e-18
Celf1	0.296297	1.14953e-86		Nras	0.281306	0.0003686														Stox2	0.35562	4.19552e-37										Rpl37	0.307893	1.19491e-21						Edrf1	0.279845	3.27094e-18
Cast	0.390131	4.63941e-86		Cct7	0.294464	0.00037382														Strbp	0.436425	5.1093e-37										Rpl27	0.311458	1.51741e-21						Scyl2	0.369016	3.42495e-18
Papola	0.312306	7.35986e-86		Cnih4	0.278488	0.000403279														Erp44	0.428832	5.32152e-37										Rpl36a	0.306662	1.85334e-21						Evi5	0.399507	3.5625e-18
Ubr3	0.26869	1.26549e-84		Gm15283	0.423369	0.000434777														Pbx1	0.430784	5.42551e-37										Col4a3bp	0.279698	2.26435e-21						Adam10	0.435458	3.69706e-18
Lrrfip2	0.365569	1.85021e-84		Kdelr2	0.280761	0.000450017														Fbxo42	0.365853	5.56285e-37										Rps28	0.330973	2.89369e-21						Zfp292	0.310037	3.90086e-18
Psmd11	0.280213	4.66052e-84		Copa	0.363673	0.00045557														Il1f9	0.311102	6.09413e-37										Mbnl2	0.290693	3.14667e-21						Smad4	0.389711	3.94008e-18
Tgfbr1	0.28891	2.02554e-83		Prdm1	0.419323	0.000476413														Hdac4	0.358994	7.15546e-37										Atf3	0.422451	3.37614e-21						Plekha1	0.392193	4.21694e-18
Atp13a3	0.331813	3.43523e-83		Sesn2	0.317352	0.000477164														Ripk2	0.479455	8.2456e-37										Pip5k1a	0.283986	4.03435e-21						Lcorl	0.47673	4.34353e-18
Pnisr	0.254765	3.55099e-83		Spcs1	0.328176	0.000479173														Abcf1	0.372318	8.58911e-37										Rps9	0.314627	8.66975e-21						Rps6ka5	0.478439	4.63406e-18
Ubash3b	0.383781	4.17347e-83		Atp11a	0.363541	0.000480846														Tmem170b	0.302309	9.21601e-37										Csnk1g1	0.251513	9.09997e-21						Prpf38b	0.323274	4.92782e-18
Ecpas	0.294267	1.06487e-82		Mrfap1	0.374897	0.000488019														Rnf38	0.468772	1.28247e-36										Acbd6	0.286613	9.69717e-21						Pdxdc1	0.331127	5.24372e-18
Atxn2	0.2834	1.61254e-82		Bbx	0.279462	0.000504459														Zc3h12c	0.66844	1.92199e-36										Rlf	0.252586	9.89125e-21						Rptor	0.313844	5.76108e-18
Tcf12	0.262403	2.81357e-82		Ankrd13c	0.266319	0.000506738														Smarcc1	0.368069	2.05707e-36										Eda	0.381513	1.00821e-20						Senp2	0.422112	5.77495e-18
Mark2	0.26442	4.5923e-82		Ppp2r5e	0.324759	0.00052975														Ilrun	0.336267	2.12424e-36										Rabgap1	0.251302	1.10756e-20						Kctd3	0.334041	6.17917e-18
Ckap5	0.26057	1.25381e-81		Srebf2	0.305952	0.000546641														Tnpo1	0.436003	2.68192e-36										Uba6	0.276074	1.31728e-20						Plcg1	0.291396	6.25726e-18
Itgb1	0.514752	1.51059e-81		Ppp1r14b	0.336982	0.000555987														Prrc2b	0.375406	2.76462e-36										Arih1	0.310863	1.67528e-20						Traf3ip2	0.336465	6.68075e-18
Dnajc1	0.31983	3.01857e-81		Mga	0.264411	0.000563884														Acad9	0.254075	3.21499e-36										Agpat4	0.409596	2.05894e-20						Ckap5	0.366535	8.00034e-18
Atad2	0.250175	7.31805e-81		Arf1	0.338442	0.000567154														Sacm1l	0.371096	3.27111e-36										Rpl35	0.326625	3.56303e-20						Hadha	0.354285	9.02399e-18
Ubn2	0.30786	9.45594e-81		Stat1	0.290717	0.000634849														Pdxdc1	0.422454	4.30016e-36										Rps6	0.329509	3.65489e-20						Ski	0.350288	9.10119e-18
Srrm2	0.285344	1.71613e-79		Surf4	0.259878	0.000652277														Zfr	0.428847	4.74689e-36										Tra2b	0.263667	6.10767e-20						Atad3a	0.26976	9.18593e-18
Ncor1	0.264259	4.18963e-78		Celf1	0.330268	0.00065939														Acot9	0.404673	5.28606e-36										Gmds	0.29398	6.378e-20						Zfp277	0.354863	9.23373e-18
Kif13b	0.319598	6.07497e-78		Pbrm1	0.395099	0.000694988														Eea1	0.361375	5.5498e-36										Fbxw11	0.2751	8.16218e-20						Xpo6	0.357999	1.04362e-17
Pdlim5	0.41261	1.3536e-77		Tnks2	0.394672	0.000695605														Slco2a1	0.566201	5.62964e-36										Atxn2	0.298497	1.10652e-19						Egr1	0.833217	1.11842e-17
Pan3	0.306693	2.60891e-77		Glg1	0.352351	0.000722433														Pqlc1	0.361479	6.04349e-36										Rps17	0.291656	1.13556e-19						Mms19	0.330135	1.13669e-17
Usp25	0.268393	9.51496e-77		Hacd2	0.357369	0.000731725														4930523C07Rik	0.515777	6.67776e-36										Ppp6r3	0.268986	1.72776e-19						Pik3ca	0.378852	1.24716e-17
Hist1h4d	0.342059	6.76732e-76		Fam172a	0.349813	0.000763993														Myo6	0.770435	6.86623e-36										Rngtt	0.267209	2.16674e-19						Hivep1	0.355922	1.2788e-17
Cox7c	0.26876	2.41394e-74		Plxnb2	0.321497	0.000785887														Lsg1	0.304482	1.00893e-35										Trip12	0.286622	2.35121e-19						Rc3h1	0.38725	1.30546e-17
Erbin	0.302368	1.97088e-73		Manf	0.262715	0.000807935														Dync1li1	0.360445	1.01975e-35										Cnot1	0.250001	2.62167e-19						Gigyf1	0.290225	1.39442e-17
Wac	0.289038	7.21226e-72		Ralgapa2	0.308846	0.000808486														Srcap	0.368302	1.02723e-35										Fosb	0.296192	4.98139e-19						Gnl2	0.280351	1.51878e-17
Bmpr2	0.280898	9.17159e-72		Myl12a	0.490262	0.000808834														Hbs1l	0.365579	1.04307e-35										Tsc22d2	0.30527	6.41325e-19						Nxf1	0.266446	1.52445e-17
Cask	0.253209	1.34838e-71		Actb	0.581615	0.000834552														Mob4	0.366667	1.17567e-35										Ppp3ca	0.270689	1.45686e-18						Ppp1r37	0.307662	1.54088e-17
Rab10	0.296417	1.65853e-71		Trip12	0.384123	0.000902112														Capza1	0.320411	1.40927e-35										Rps12	0.29264	2.47002e-18						Neat1	0.350114	1.62377e-17
Slc4a7	0.379916	1.52094e-70		Ssh2	0.364754	0.000931702														Vps26a	0.363992	1.52053e-35										Ube2k	0.269917	4.3731e-18						Fbxo3	0.287958	1.72969e-17
H3f3b	0.274676	8.16991e-69		Tanc1	0.331838	0.000941738														Zmynd11	0.407781	1.54743e-35										Rpl3	0.308003	5.15389e-18						Tspan14	0.314827	1.97197e-17
Setd5	0.266727	2.90748e-68		Tuba1b	0.34487	0.000966119														Arih2	0.351906	1.74911e-35										March3	0.444204	5.37972e-18						Ankrd13c	0.35837	1.97462e-17
Cox8a	0.251529	9.15819e-68		Inpp5a	0.325494	0.000977528														Zzz3	0.435199	1.91243e-35										Aff1	0.30496	6.41445e-18						Yy1	0.315462	1.98192e-17
H2afz	0.303438	2.84671e-64		Prelid1	0.38026	0.00098309														Efnb2	0.388991	1.91862e-35										Rps21	0.294466	1.52846e-17						Katnbl1	0.337979	1.99464e-17
Plec	0.256223	9.03338e-64		Pfn1	0.436276	0.000984343														Amd1	0.335831	2.15545e-35										Eef1a1	0.274727	1.55539e-17						Rabgap1	0.378347	2.27058e-17
Mbtd1	0.252613	4.49546e-63		Wdr33	0.251286	0.000987568														Carnmt1	0.33926	2.29094e-35										Fst	0.369532	1.86886e-17						Metap1	0.363691	2.36639e-17
Jun	0.317982	6.75197e-53		Usp34	0.429765	0.0010192														Mms19	0.360468	2.36058e-35										Eif3f	0.250136	2.62941e-17						Hipk3	0.375552	2.79754e-17
Rps6ka3	0.261217	3.04833e-45		Purb	0.331327	0.00105219														Dcun1d3	0.494619	2.49482e-35										Rpl10	0.274003	2.59644e-16						Brix1	0.274664	2.88452e-17
Neat1	0.368857	6.10442e-44		Pxk	0.286032	0.00106512														Zfp180	0.281766	3.11931e-35										Nrip1	0.252445	6.32572e-16						Snx27	0.330422	3.10874e-17
Klf12	0.408182	1.70554e-42		P4ha1	0.309503	0.00109638														Dlg2	0.754421	3.14739e-35										Rpl34	0.296196	7.8295e-16						Kif5b	0.280557	3.6947e-17
				Slmap	0.391875	0.00110563														Atg14	0.299878	3.24427e-35										Rpl11	0.263467	2.61429e-15						Tpm1	0.861325	4.48076e-17
				Gapvd1	0.292665	0.00112708														Brd4	0.346757	3.54927e-35										Rplp1	0.258682	7.35178e-15						Acaca	0.403947	4.56363e-17
				Yme1l1	0.265847	0.00114049														Rsrc2	0.393994	3.66791e-35										Rpl39	0.284014	1.19724e-14						Ino80d	0.381152	5.01406e-17
				Atrx	0.376826	0.00117311														Hspa9	0.351517	3.9131e-35										Fau	0.250927	1.49754e-14						Mtmr12	0.384278	5.29697e-17
				Impad1	0.298257	0.00120601														Khdrbs1	0.4368	5.59527e-35										Krt10	0.317659	5.97502e-14						Ppp1r13b	0.290201	5.8754e-17
				Ly6e	0.398749	0.00123875														Zfp277	0.365635	7.09739e-35										Skint6	0.399139	1.03765e-13						Hspa4l	0.312059	6.68984e-17
				Cnot4	0.42089	0.00124428														Phactr4	0.623363	7.11244e-35										Nedd4l	0.32988	1.68705e-13						Capn7	0.348003	7.24669e-17
				Actr3	0.422285	0.00128971														Arid4a	0.350957	7.47865e-35										Rpsa	0.252393	2.3195e-12						March7	0.320017	8.39765e-17
				Hsp90aa1	0.454365	0.00134324														Nmd3	0.357379	8.61276e-35										Susd6	0.353335	9.50903e-11						Fam13b	0.330851	8.54452e-17
				Tet3	0.285248	0.00134549														Fgd6	0.437524	8.92558e-35																		Rps6ka3	0.491111	8.91854e-17
				Swi5	0.300356	0.00136849														Sf1	0.334846	9.47451e-35																		Foxk1	0.308835	1.03952e-16
				Cand1	0.258008	0.00153577														Tmcc3	0.562357	1.15404e-34																		Sema3c	0.361382	1.13444e-16
				Tsc22d2	0.487359	0.00158469														Picalm	0.387988	1.32243e-34																		Zfp664	0.295657	1.44191e-16
				Hist1h1b	0.250683	0.00169843														Cdc73	0.406569	1.34233e-34																		Cpne1	0.336928	1.68718e-16
				Rfc1	0.253743	0.00171311														Fbxo33	0.369302	1.41542e-34																		Msrb3	0.446056	1.91568e-16
				Xpo7	0.329946	0.0017247														Tead1	0.510431	1.51293e-34																		Lrch1	0.279835	1.96573e-16
				Tln1	0.279866	0.00177386														Me1	0.582375	2.26273e-34																		Cog5	0.404325	2.04245e-16
				Hras	0.28152	0.00187361														Afap1	0.346107	2.51509e-34																		Zfp655	0.362709	2.31462e-16
				Smurf2	0.407213	0.00190789														Spaca6	0.364323	3.05522e-34																		Mpp6	0.393689	2.46406e-16
				Aldoa	0.511043	0.00202086														Kifc3	0.555515	4.01407e-34																		Gcnt2	0.476816	2.4948e-16
				Ly6d	0.486854	0.0020365														Rad21	0.380272	4.0615e-34																		Nap1l1	0.277005	2.56583e-16
				Tcf7l2	0.311943	0.00205152														Exoc4	0.387073	4.54911e-34																		Spast	0.320691	2.81836e-16
				Mgmt	0.280563	0.0023959														Dido1	0.27723	4.90726e-34																		Ccdc88c	0.301008	2.99714e-16
				Pank3	0.398211	0.00255778														Dip2c	0.45761	5.62345e-34																		Eif4b	0.27267	3.08721e-16
				Tcf20	0.327172	0.00279099														Abce1	0.358867	6.74684e-34																		Cdv3	0.291308	3.17847e-16
				Hnrnpa0	0.267799	0.00293296														Rell1	0.41251	6.89862e-34																		Nop56	0.267346	3.59464e-16
				Anapc5	0.265764	0.00309217														6720427I07Rik	0.356742	7.22049e-34																		Actr1a	0.309224	3.94454e-16
				Zmym2	0.300373	0.00309409														Elf2	0.373047	7.39453e-34																		Bcl2l13	0.306292	4.50562e-16
				Eif4h	0.286998	0.00309909														Zswim6	0.436027	8.32608e-34																		Stx3	0.359813	4.58029e-16
				Rasa1	0.294359	0.00312481														Kctd3	0.309685	8.39805e-34																		Naf1	0.307257	4.66691e-16
				mt-Nd5	0.484084	0.00316654														Traf6	0.371501	8.60354e-34																		Fancc	0.33102	4.97498e-16
				Epc1	0.299513	0.00352011														Panx1	0.362275	1.21012e-33																		Hagh	0.303183	5.41976e-16
				Mbd5	0.346883	0.00353668														Gm20732	0.303458	1.35728e-33																		Setd7	0.328968	5.54847e-16
				Suz12	0.32159	0.0036728														Srsf7	0.371074	1.50376e-33																		Sf1	0.271117	5.57715e-16
				Canx	0.349332	0.00383633														Dnajc7	0.324688	1.60908e-33																		Nmd3	0.300018	6.2529e-16
				Rbm6	0.343022	0.00393044														Trim24	0.414387	1.66409e-33																		Kdm4c	0.38348	6.51939e-16
				Pias2	0.251165	0.0039757														Samd8	0.342829	1.74277e-33																		Pogz	0.272576	7.6478e-16
				Rsrc1	0.33668	0.00439971														Auts2	0.280928	1.80746e-33																		Sertad2	0.500455	8.30719e-16
				Rcor1	0.366446	0.00457456														Rcan1	0.272983	1.81e-33																		Zfp410	0.297443	9.52204e-16
				Gm47283	0.552251	0.00464791														Kif13a	0.575878	1.81876e-33																		Rb1	0.426725	1.03846e-15
				Cct6a	0.307803	0.00477478														Ogdh	0.405659	1.91682e-33																		Map3k4	0.316859	1.07914e-15
				Hnrnpd	0.299318	0.00518571														Map3k5	0.394314	2.57272e-33																		Cdc27	0.337193	1.12972e-15
				Rad21	0.326888	0.00519946														Nol10	0.329913	3.20106e-33																		Mark2	0.2745	1.21936e-15
				Mdh2	0.265545	0.00565571														Taok1	0.335238	4.34311e-33																		Phc2	0.31183	1.22602e-15
				Kdm3a	0.314277	0.00581004														Usp4	0.344154	6.68051e-33																		Ogfod1	0.264496	1.22903e-15
				Ccar1	0.26504	0.00602291														Kif1b	0.374487	7.50207e-33																		Capn2	0.420855	1.3976e-15
				Ptbp2	0.269792	0.00672716														Klhl18	0.349377	9.27658e-33																		Baz2a	0.341617	1.43225e-15
				Slc38a2	0.299486	0.00694131														Arid2	0.345049	1.14579e-32																		Cacna1c	0.669554	1.51689e-15
				mt-Nd3	0.492264	0.00709916														Mtfr1	0.279162	1.15846e-32																		Morc2a	0.28262	1.71161e-15
				Pds5a	0.261863	0.00757979														Rab30	0.436488	1.19905e-32																		Hibadh	0.401716	1.78254e-15
				Nfib	0.258592	0.00765055														Evi5	0.451714	1.44683e-32																		Jun	0.472789	1.85482e-15
				Clasp2	0.252515	0.00770829														Chd6	0.436064	1.93967e-32																		Zfp592	0.265135	1.87945e-15
				Cfl1	0.341499	0.00795437														Usp14	0.46299	1.95035e-32																		Mapk8ip3	0.29993	1.92717e-15
				Aprt	0.293029	0.00798759														Kat6b	0.403252	1.96433e-32																		Glg1	0.31982	2.00108e-15
				Nsd2	0.331954	0.00801876														Il20rb	0.373401	2.04467e-32																		Ldb1	0.252982	2.08052e-15
				Svil	0.345652	0.00873762														Smo	0.357943	2.11978e-32																		Sec24b	0.337311	2.0922e-15
				Gpx1	0.457838	0.00906951														Uba3	0.272614	2.3359e-32																		Orc4	0.304241	2.22688e-15
				Arhgef3	0.358602	0.0091514														Heatr3	0.270402	2.56126e-32																		Cstf3	0.375957	2.26061e-15
				Hnrnpm	0.262321	0.00938959														Frmd6	0.332738	2.82078e-32																		Taf4	0.316475	2.39024e-15
				Nr2c2	0.266835	0.00957515														Snhg4	0.28311	3.64236e-32																		Dnm1l	0.329986	2.41363e-15
				Thoc2	0.320622	0.0100009														Mfhas1	0.392478	3.64919e-32																		Rbm25	0.304636	2.47242e-15
				Ssr3	0.32344	0.0104732														Vezt	0.336153	4.26975e-32																		Rad23b	0.321835	2.52199e-15
				Nrf1	0.285974	0.0109433														Fto	0.432859	4.96102e-32																		Erf	0.305338	2.57767e-15
				Rptor	0.316502	0.0109978														Styx	0.326248	5.01502e-32																		Map4k5	0.275421	2.74876e-15
				Kdm5c	0.296737	0.0124785														Ehmt1	0.373163	5.13593e-32																		N4bp2l2	0.276876	3.28497e-15
				Tnpo3	0.282817	0.0125787														Notch1	0.340258	5.19046e-32																		Ube2e1	0.374106	3.30636e-15
				Dlg1	0.398367	0.0127303														Tpd52l2	0.30836	6.24876e-32																		Csnk1d	0.339245	3.6297e-15
				Dync1h1	0.327419	0.0136537														Stk17b	0.255119	6.30877e-32																		Dusp7	0.299632	3.72255e-15
				Pdlim5	0.314961	0.0148279														Rsrc1	0.38779	7.22574e-32																		Abce1	0.29803	3.78341e-15
				R3hdm2	0.311797	0.0156419														Atp6v0a2	0.36302	8.60355e-32																		Aff4	0.284046	3.80102e-15
				Dctn4	0.285917	0.0183439														Pitpnb	0.346907	1.19499e-31																		Wipi2	0.267864	4.158e-15
				Cct2	0.254436	0.0192844														Lrp5	0.299849	1.35438e-31																		Bcorl1	0.380333	4.24129e-15
				Numb	0.282258	0.0206403														Ubash3b	0.633615	1.48677e-31																		Uhrf1bp1l	0.395691	4.91488e-15
				Fabp5	0.448642	0.0215247														Tet3	0.360379	1.67083e-31																		Utp6	0.253518	5.22923e-15
				Klf13	0.273798	0.0219571														Xpo6	0.347926	2.22202e-31																		Wls	0.301641	5.73563e-15
				Eif4g1	0.277899	0.0259677														Acvr1b	0.307214	2.50599e-31																		Smad2	0.347575	5.81454e-15
				Dnajc1	0.314727	0.0296173														Rcl1	0.329332	2.63337e-31																		Epha2	0.275323	5.87071e-15
				Gnb1	0.333498	0.0296291														Papss1	0.392266	3.77886e-31																		Fam91a1	0.322095	5.91586e-15
				Ap1g1	0.345173	0.0320996														Tnrc6a	0.416409	4.4062e-31																		Srrt	0.276203	5.95879e-15
				Prrc2b	0.258451	0.0321909														Lima1	0.432464	4.92555e-31																		Hdac8	0.469291	6.30051e-15
				Ube2s	0.263189	0.0356069														Fam13b	0.356761	5.52623e-31																		Abcf1	0.252611	7.53081e-15
				Exoc4	0.330936	0.0357304														Ankrd10	0.31427	6.3537e-31																		Dnajc1	0.435032	7.72531e-15
				Ube2k	0.32598	0.0366267														Zfp407	0.366961	7.15034e-31																		Sirt1	0.277809	9.076e-15
				Golga4	0.273954	0.0401055														Nfkbiz	0.331184	7.37017e-31																		Atad2	0.392918	9.91504e-15
				Hspa5	0.334922	0.041159														Tmem40	0.313538	7.68846e-31																		Smchd1	0.274355	1.05417e-14
				Ywhae	0.265239	0.0538021														Srrm1	0.337705	8.41252e-31																		Dgcr2	0.317742	1.06651e-14
				Vps13d	0.304908	0.0553887														Med26	0.263323	8.63578e-31																		Mex3c	0.360209	1.08098e-14
				Mapk1	0.266529	0.055505														Arglu1	0.335066	1.03531e-30																		Taf3	0.343324	1.0895e-14
				Arpc5	0.264587	0.0562192														Aatf	0.394783	1.28281e-30																		Ptpn9	0.296659	1.22712e-14
				Mt2	0.390837	0.0622096														Cpd	0.3249	1.28625e-30																		Irs2	0.376637	1.22817e-14
				Ddx17	0.323055	0.0687856														Fbxl17	0.381474	1.32967e-30																		Pafah1b2	0.307104	1.26797e-14
				Ywhaq	0.262043	0.0777438														Nebl	0.573622	1.6018e-30																		Srsf5	0.256398	1.30517e-14
				Ranbp1	0.255226	0.0809385														Nsf	0.519621	1.78492e-30																		Klhl7	0.394825	1.3329e-14
				Sfpq	0.270631	0.0827794														Cbfb	0.432218	1.85003e-30																		Bicral	0.341916	1.41643e-14
				Ahctf1	0.276266	0.0837621														Ufd1	0.314398	1.8987e-30																		Gga2	0.27113	1.55821e-14
				Smc4	0.368809	0.089185														Lrp6	0.337458	1.9951e-30																		Cramp1l	0.303791	1.597e-14
				Eif5a	0.351015	0.090049														Itpr2	0.350838	2.41323e-30																		Mapk1	0.279325	2.23305e-14
				Syncrip	0.279586	0.093702														Tent4a	0.25022	2.69098e-30																		Bsdc1	0.353527	2.24512e-14
				Neat1	0.377654	0.096808														Emsy	0.439552	2.89183e-30																		Exoc4	0.325126	2.25327e-14
																				Yy1	0.300237	2.97833e-30																		Alg13	0.29167	2.25352e-14
																				Pias2	0.417813	3.15937e-30																		Clk4	0.302234	2.3322e-14
																				Ilf2	0.366712	3.21516e-30																		Bag4	0.270097	2.38127e-14
																				Tfb2m	0.2521	4.16694e-30																		Api5	0.337291	2.55765e-14
																				Map7d1	0.355954	4.28297e-30																		Kat7	0.307457	2.73312e-14
																				Abl2	0.34284	5.66177e-30																		Rnf2	0.375844	2.74918e-14
																				Gja1	0.334084	6.75903e-30																		Stx6	0.312582	2.80653e-14
																				Usp28	0.299689	8.31403e-30																		Lbr	0.250435	2.81834e-14
																				Zyg11b	0.361704	8.38903e-30																		Usp6nl	0.367193	2.8407e-14
																				Tbc1d10a	0.253685	8.50373e-30																		Gm20732	0.304497	2.8777e-14
																				Rapgef2	0.417212	1.01432e-29																		Rad54l2	0.281392	2.97406e-14
																				Wdr33	0.287784	1.02253e-29																		Rnf115	0.403356	2.9956e-14
																				Zc3h15	0.352255	1.19099e-29																		Mob1b	0.312918	3.28293e-14
																				Rev1	0.427823	1.25816e-29																		Zdhhc20	0.368058	3.28465e-14
																				Dcun1d1	0.351275	1.45732e-29																		Mtmr3	0.320883	3.37142e-14
																				Tpp2	0.365959	1.49029e-29																		G3bp2	0.293735	3.40307e-14
																				Hnrnpr	0.352435	1.55391e-29																		Abcd3	0.271517	3.50028e-14
																				Utp4	0.277612	1.65608e-29																		Zcchc8	0.274855	3.93328e-14
																				Slc5a1	0.956342	1.73096e-29																		Pkd1	0.306725	4.63044e-14
																				Brix1	0.321735	1.81488e-29																		Fam102a	0.271823	5.41032e-14
																				Ckap5	0.376937	1.96516e-29																		Rsrc2	0.313187	5.4504e-14
																				Gtf2h1	0.299483	2.14187e-29																		Ahnak2	0.266697	5.52537e-14
																				Sipa1l1	0.264296	2.30015e-29																		Foxn2	0.320497	5.58497e-14
																				Stxbp5	0.329031	2.41596e-29																		Suclg2	0.306496	5.76906e-14
																				Nectin4	0.409431	2.52744e-29																		Vapa	0.311116	6.53749e-14
																				Ammecr1	0.366649	2.60945e-29																		Cul2	0.298418	6.84088e-14
																				Dicer1	0.319584	2.66033e-29																		Mia2	0.29039	7.66741e-14
																				Cul1	0.420478	2.7004e-29																		Taok1	0.2577	7.92055e-14
																				Clk4	0.283969	3.07929e-29																		Hnrnph3	0.277533	7.99623e-14
																				Krt15	0.339593	3.63662e-29																		Ccser2	0.374998	8.00228e-14
																				Hmgcr	0.374441	3.72115e-29																		Zyg11b	0.323644	8.21486e-14
																				Cspp1	0.348014	3.8082e-29																		Sec61a2	0.337981	8.49205e-14
																				Zdhhc20	0.379476	3.86135e-29																		Ormdl3	0.265981	8.84299e-14
																				Rnf11	0.266498	4.11294e-29																		Fcho2	0.280005	9.52575e-14
																				Susd6	0.423538	4.49479e-29																		Pik3r1	0.26978	9.6706e-14
																				Suz12	0.427375	4.5646e-29																		Diaph3	0.46031	9.7833e-14
																				Kdm7a	0.34612	4.73135e-29																		Aatf	0.362678	9.87815e-14
																				Ndel1	0.386315	4.88243e-29																		Ssx2ip	0.314798	1.02371e-13
																				Nrf1	0.405494	5.02498e-29																		Gls	0.34387	1.04291e-13
																				Osbpl2	0.299437	5.11764e-29																		Fer	0.275309	1.05406e-13
																				Ralgapa2	0.287194	5.6874e-29																		Nrip1	0.408518	1.1073e-13
																				Dcaf5	0.368963	6.07066e-29																		Myc	0.268285	1.15189e-13
																				Rabggtb	0.276403	6.09554e-29																		Mapk14	0.293441	1.1587e-13
																				Zfp410	0.289532	6.85112e-29																		Klhdc10	0.294878	1.22524e-13
																				Nrg1	0.721656	6.91137e-29																		Ralgds	0.333635	1.23884e-13
																				Arfgef1	0.331984	8.50166e-29																		Kif1b	0.36271	1.24301e-13
																				Ptch1	0.297845	9.28097e-29																		Zfp451	0.279357	1.24712e-13
																				Pxdc1	0.412464	1.08723e-28																		Zfand6	0.348464	1.24833e-13
																				Pdpr	0.269782	1.20659e-28																		Trp53bp1	0.275917	1.25628e-13
																				Arhgap35	0.375552	1.20685e-28																		Pwwp2a	0.342299	1.39675e-13
																				Stk40	0.31634	1.23254e-28																		Hectd4	0.275016	1.4096e-13
																				Flvcr1	0.36097	1.28925e-28																		Pcyt2	0.262338	1.47135e-13
																				Gpcpd1	0.350345	1.43966e-28																		Serinc5	0.334048	1.62419e-13
																				Btbd1	0.406484	1.5842e-28																		Oxr1	0.32455	1.79599e-13
																				Rbbp8	0.702325	1.62311e-28																		Col18a1	0.339948	1.84501e-13
																				Ctdspl	0.295837	1.75431e-28																		Ano6	0.279322	1.88123e-13
																				Tasor2	0.309417	1.78163e-28																		Numb	0.259953	1.93084e-13
																				Nub1	0.292233	1.90799e-28																		Stag2	0.329495	2.08556e-13
																				Kctd9	0.274796	1.94272e-28																		E130308A19Rik	0.351725	2.17946e-13
																				Atrn	0.35064	2.11739e-28																		Vwa8	0.275772	2.22422e-13
																				Adnp	0.331328	2.15053e-28																		Ctr9	0.26872	2.33641e-13
																				Dop1a	0.296146	2.2311e-28																		Dag1	0.256748	2.43625e-13
																				Mpp7	0.427377	2.44983e-28																		Ube2r2	0.323829	2.48726e-13
																				Uri1	0.334468	2.61791e-28																		Cast	0.366988	2.5155e-13
																				Api5	0.358962	3.10043e-28																		Zhx3	0.436664	2.72651e-13
																				Bckdhb	0.260353	3.13978e-28																		Acox1	0.306149	2.74438e-13
																				Anxa1	0.437241	3.30687e-28																		Ccnt1	0.302348	2.87373e-13
																				Ube4b	0.335289	3.54112e-28																		Glud1	0.306913	3.04283e-13
																				Itga2	0.638265	3.55755e-28																		S100pbp	0.268322	3.29472e-13
																				Adk	0.382112	3.86608e-28																		Sipa1l3	0.293827	3.45344e-13
																				Cttn	0.269283	3.93825e-28																		Nucks1	0.29182	3.47099e-13
																				1810026B05Rik	0.321241	4.26594e-28																		U2af1	0.251924	3.58215e-13
																				Zfx	0.347156	4.57541e-28																		Pip5k1a	0.305233	3.6768e-13
																				Fbxo8	0.26932	4.84089e-28																		Pias1	0.390638	3.72676e-13
																				Ror1	0.515028	5.0617e-28																		Lsg1	0.259487	4.25838e-13
																				Metap2	0.29971	6.35525e-28																		Fut8	0.361475	4.68464e-13
																				Cnbp	0.264527	7.44927e-28																		Scaper	0.378967	4.77611e-13
																				Gtf3c2	0.283856	9.91512e-28																		March5	0.319566	5.00381e-13
																				Mapkapk3	0.257949	1.13486e-27																		Ddx46	0.259864	5.09787e-13
																				Tmpo	0.339124	1.20312e-27																		Atg2b	0.340979	5.12607e-13
																				Tbc1d15	0.303624	1.22262e-27																		Herc1	0.280167	5.63103e-13
																				Ist1	0.316752	1.39908e-27																		Gm37494	0.263693	5.78477e-13
																				Zfp385a	0.271875	1.43873e-27																		Trrap	0.263143	5.80787e-13
																				Prkcd	0.286286	1.49579e-27																		Ctps	0.258151	6.11536e-13
																				Smu1	0.278617	1.52683e-27																		Zfp266	0.274937	6.32069e-13
																				Orc6	0.274311	1.80691e-27																		Plekhg3	0.375013	6.69304e-13
																				Swt1	0.325319	1.86457e-27																		Lrpprc	0.268332	6.74221e-13
																				Ago4	0.288009	2.37588e-27																		Npc1	0.285197	6.76403e-13
																				Rock1	0.370605	2.42084e-27																		Xpo1	0.337538	7.74631e-13
																				Nr2c2	0.357894	2.43905e-27																		H2afv	0.315453	8.31911e-13
																				Micall1	0.317614	3.20907e-27																		Nod2	0.268575	8.71026e-13
																				Luc7l2	0.285777	3.73115e-27																		Rell1	0.38082	8.74962e-13
																				Vps50	0.344775	3.74554e-27																		Tut4	0.33334	9.55529e-13
																				Prpf18	0.281642	4.74113e-27																		Set	0.263358	9.93105e-13
																				Ubap1	0.251102	5.79065e-27																		Cdc73	0.270534	1.05181e-12
																				Nek7	0.362425	6.10191e-27																		Fam172a	0.372048	1.08173e-12
																				Xpr1	0.446205	6.25271e-27																		Senp7	0.276359	1.09987e-12
																				Ube2j2	0.320094	6.74875e-27																		Aggf1	0.264612	1.10558e-12
																				Smad4	0.327261	7.14805e-27																		Hltf	0.261668	1.13888e-12
																				Spred2	0.529349	7.66563e-27																		Ap1g1	0.260527	1.16406e-12
																				Dcaf6	0.472013	8.77118e-27																		Agap3	0.255379	1.18929e-12
																				Diaph3	0.587216	1.39121e-26																		Ust	0.38614	1.20698e-12
																				Atp2a2	0.315068	1.64418e-26																		Chtop	0.254141	1.2295e-12
																				Rhot1	0.31657	1.82641e-26																		Arfgef1	0.283472	1.27837e-12
																				Zc3h13	0.336993	1.92996e-26																		Larp4b	0.282698	1.40324e-12
																				Csnk1g3	0.323258	2.62849e-26																		Smc6	0.294228	1.41616e-12
																				Ttc39b	0.317332	2.66561e-26																		Clip1	0.359216	1.48957e-12
																				Myh9	0.343055	2.68692e-26																		Arnt	0.389026	1.5543e-12
																				Slc12a2	0.300883	2.81757e-26																		Rufy3	0.394885	1.56149e-12
																				Dcun1d5	0.334409	3.28328e-26																		Ezh1	0.306084	1.92228e-12
																				Arl13b	0.351316	3.4725e-26																		Pex5	0.290572	1.94981e-12
																				Nup54	0.299829	3.66461e-26																		Carm1	0.267595	1.99046e-12
																				Rprd1a	0.282021	3.78098e-26																		Lrrfip1	0.304018	2.28285e-12
																				Dmtf1	0.368293	4.50751e-26																		Slc12a2	0.368906	2.28351e-12
																				Wipf2	0.325275	5.39828e-26																		Rab10	0.296744	2.30494e-12
																				Cd44	0.372263	6.58013e-26																		Rora	0.38771	2.52958e-12
																				Arl4a	0.264546	6.70301e-26																		Lancl1	0.259101	2.54808e-12
																				Mtus1	0.436131	6.86838e-26																		Dnajc7	0.288296	2.64606e-12
																				Snx13	0.340092	6.95859e-26																		Tox4	0.307004	2.86786e-12
																				Fam117b	0.407149	7.46282e-26																		Ilrun	0.272807	2.90134e-12
																				Kansl3	0.315512	7.57111e-26																		Topors	0.265307	3.07795e-12
																				Kpna3	0.332938	7.66301e-26																		Riok1	0.351826	3.26382e-12
																				Ssb	0.305958	7.93987e-26																		Nrf1	0.316344	3.30113e-12
																				Usf3	0.332144	8.35598e-26																		Apc	0.288758	4.20665e-12
																				Crebzf	0.270343	9.07526e-26																		Aebp2	0.282155	4.28702e-12
																				Psmd14	0.414721	9.09452e-26																		Grpel2	0.286994	4.3702e-12
																				Gcnt2	0.421178	9.97817e-26																		Ccar1	0.308032	4.51231e-12
																				Zbtb43	0.256998	1.15418e-25																		Hat1	0.290007	4.75736e-12
																				Kdm1a	0.274782	1.22985e-25																		Ahr	0.578148	4.76711e-12
																				Tgfbr1	0.487471	1.26339e-25																		Chd9	0.307843	4.7759e-12
																				Ggnbp2	0.290507	1.2966e-25																		Elf2	0.306823	4.82016e-12
																				Cbfa2t2	0.365716	1.32838e-25																		Acer3	0.415359	4.83842e-12
																				Pdcd10	0.298509	1.43028e-25																		Pfkp	0.345872	5.1576e-12
																				Pgrmc2	0.257559	1.51661e-25																		Ptpn1	0.292939	5.64429e-12
																				Acsl3	0.302875	1.64387e-25																		Ammecr1l	0.323338	5.835e-12
																				Srsf4	0.29719	1.90619e-25																		Tomm70a	0.2955	6.13164e-12
																				Tent5a	0.303434	1.94023e-25																		Rbm5	0.265728	6.21423e-12
																				Mast2	0.463689	2.07452e-25																		Tmpo	0.309904	6.24132e-12
																				Hif1a	0.374181	2.25012e-25																		Cfl2	0.302611	6.81311e-12
																				Rlim	0.313067	2.27707e-25																		Hivep3	0.54117	6.97229e-12
																				Cog5	0.329262	2.41539e-25																		Esf1	0.268386	7.32138e-12
																				Sgpp1	0.270276	2.49401e-25																		Zc3h13	0.311344	7.34466e-12
																				Vgll4	0.458712	3.02649e-25																		Phf2	0.262729	7.99753e-12
																				Itpk1	0.432058	3.36316e-25																		Mob4	0.25982	8.70541e-12
																				Ptbp2	0.315462	4.0643e-25																		Hipk1	0.255323	8.89109e-12
																				Med14	0.30952	4.88883e-25																		Pou2f1	0.37366	9.03319e-12
																				Ergic2	0.308179	6.06366e-25																		Sacm1l	0.295593	9.38387e-12
																				Paip1	0.294752	6.10722e-25																		Anks1	0.294825	9.78219e-12
																				Spin1	0.323719	6.33241e-25																		Hk2	0.379511	9.93216e-12
																				Anxa11	0.325842	7.8396e-25																		Lonp2	0.299823	1.02791e-11
																				Trerf1	0.401546	1.05682e-24																		Rgs20	0.419013	1.0455e-11
																				Srek1	0.346255	1.14132e-24																		Mtfr1	0.270139	1.14404e-11
																				Btg3	0.340157	1.37529e-24																		Chchd3	0.342681	1.21222e-11
																				Prkar2a	0.266551	1.38987e-24																		Rheb	0.303049	1.25274e-11
																				Jak1	0.328037	1.42602e-24																		Relch	0.303138	1.49371e-11
																				Bcorl1	0.307573	1.63725e-24																		Inpp5f	0.277971	1.66319e-11
																				Kremen1	0.25229	1.67285e-24																		Vti1a	0.421808	1.66786e-11
																				Adam17	0.319243	1.74213e-24																		Apoc1	0.339949	1.84939e-11
																				Pprc1	0.269156	1.79521e-24																		Mga	0.28531	1.97085e-11
																				Thoc1	0.296171	2.04782e-24																		Atrn	0.368631	2.07853e-11
																				Fam102a	0.263639	2.26149e-24																		Lsm14a	0.260912	2.13853e-11
																				Gpd2	0.267094	2.40238e-24																		Taf4b	0.27008	2.29067e-11
																				Smurf1	0.414197	2.42215e-24																		Rnf146	0.282302	2.35589e-11
																				Rab28	0.353035	2.7583e-24																		Nup160	0.260734	2.5551e-11
																				Vta1	0.319719	3.01865e-24																		Sptan1	0.274154	2.56551e-11
																				Slc39a8	0.288098	3.41756e-24																		Zwint	0.26357	2.58683e-11
																				Supt5	0.266851	3.66346e-24																		Ext1	0.306494	2.76377e-11
																				Banp	0.339144	3.69288e-24																		Smc5	0.277279	2.98083e-11
																				Akap10	0.288871	4.67974e-24																		Ssh2	0.333285	3.32843e-11
																				Ipo5	0.296254	4.76088e-24																		Ankib1	0.331641	3.57599e-11
																				Hk1	0.262873	4.87055e-24																		Cops2	0.266723	3.68713e-11
																				Zmym5	0.28684	5.01689e-24																		Rnf4	0.26217	3.74502e-11
																				Zfp217	0.268912	5.30469e-24																		Smarca4	0.254249	4.1571e-11
																				Ide	0.306862	6.30752e-24																		Prpf40a	0.254228	4.21647e-11
																				Acin1	0.265342	8.9715e-24																		Med14	0.254209	4.49508e-11
																				Fosb	0.405503	9.53755e-24																		Usp22	0.272049	5.03483e-11
																				Srsf1	0.259419	9.66612e-24																		Prkca	0.279645	5.68368e-11
																				Ppm1g	0.288716	1.10818e-23																		Fam117b	0.368523	5.83435e-11
																				Rprd2	0.307581	1.32026e-23																		Ube2n	0.298446	5.9348e-11
																				Usp16	0.33765	1.64697e-23																		Rrn3	0.260484	6.30573e-11
																				Atp10a	0.403948	1.69202e-23																		Prkag2	0.26669	6.32524e-11
																				Sinhcaf	0.28554	1.77947e-23																		Snd1	0.262985	6.68387e-11
																				Pam	0.264725	1.81883e-23																		Top2a	0.464873	6.7478e-11
																				Wdr70	0.296007	2.18822e-23																		Eri3	0.251404	7.79184e-11
																				Pdhb	0.294163	2.50266e-23																		Mpp5	0.337515	7.80372e-11
																				Xpo4	0.300851	2.50898e-23																		Fdft1	0.262948	7.94133e-11
																				Sipa1l3	0.328775	2.5866e-23																		Phf21a	0.297858	8.19819e-11
																				Trp53inp1	0.372224	3.93906e-23																		Exoc5	0.279267	9.0544e-11
																				Slc35f5	0.304566	4.31509e-23																		Uimc1	0.281969	9.12356e-11
																				Bptf	0.279831	4.84309e-23																		Nipal2	0.352908	9.36073e-11
																				Gabpb1	0.32218	6.19866e-23																		Med26	0.274192	1.26955e-10
																				Tspan3	0.441556	6.25274e-23																		Ccnd2	0.253695	1.32475e-10
																				Usp37	0.294848	7.37023e-23																		Ap2a2	0.257105	1.41981e-10
																				Snhg12	0.294282	8.06285e-23																		Ncbp3	0.275103	1.54165e-10
																				Mat2a	0.359031	8.23132e-23																		Rnf10	0.264678	1.63153e-10
																				Fbxo3	0.290435	8.29564e-23																		Ankrd50	0.272974	2.02145e-10
																				Ss18	0.34183	9.10222e-23																		Snx7	0.39982	2.58852e-10
																				Sec63	0.360658	9.31641e-23																		Pde4d	0.315351	2.67584e-10
																				Ahr	0.27968	9.39676e-23																		Kctd9	0.271003	2.67599e-10
																				Ddx21	0.265154	1.02603e-22																		Phf14	0.30114	2.79266e-10
																				Atg5	0.294914	1.20117e-22																		Tm9sf2	0.253809	2.8593e-10
																				Lcorl	0.434329	1.30113e-22																		Chd8	0.257698	2.94183e-10
																				Lrrc8b	0.346665	1.35349e-22																		Atp8a1	0.407262	3.07644e-10
																				Axin1	0.260822	1.57856e-22																		Nufip2	0.282903	3.155e-10
																				Pkib	0.464106	1.58876e-22																		Insig2	0.283917	3.21982e-10
																				Inpp5a	0.285453	1.73965e-22																		Uty	0.278602	3.29675e-10
																				Tmed5	0.257403	1.76695e-22																		Lmbrd2	0.283082	3.48127e-10
																				Tex30	0.263489	1.854e-22																		Nsd1	0.274674	3.94886e-10
																				Gtf3c1	0.281864	1.91717e-22																		Nt5c3	0.283663	4.04593e-10
																				Fbxo38	0.291918	2.43382e-22																		Utp18	0.294907	4.10668e-10
																				Usp31	0.308935	2.57549e-22																		Ergic2	0.289496	4.41314e-10
																				Crtc3	0.429825	3.02962e-22																		Sp3	0.26043	4.64435e-10
																				Zwint	0.269391	3.27217e-22																		Dlgap4	0.367929	5.42065e-10
																				Cyth3	0.321907	3.36327e-22																		Chic2	0.284246	5.66454e-10
																				Fry	0.317122	4.11374e-22																		Ppp4r1	0.282716	6.73198e-10
																				Brd7	0.253881	4.11682e-22																		Dnajc21	0.253792	7.94504e-10
																				Fam133b	0.331449	5.09986e-22																		Homer1	0.309489	8.11309e-10
																				Mapk1ip1l	0.29778	5.79278e-22																		Brd7	0.253912	8.49724e-10
																				Chd9	0.294155	6.60117e-22																		Prep	0.255437	8.63365e-10
																				Serinc5	0.270757	6.65789e-22																		Zfp217	0.251223	8.78934e-10
																				Foxo1	0.278467	8.1677e-22																		Rbm33	0.273161	9.24972e-10
																				E330009J07Rik	0.283307	8.36272e-22																		Kpna3	0.269589	1.04974e-09
																				Smc4	0.376101	1.3107e-21																		Rarg	0.298277	1.17906e-09
																				Naf1	0.271284	1.44247e-21																		Pmepa1	0.325451	1.21682e-09
																				Psmb2	0.295598	1.49426e-21																		Reep3	0.333568	1.26938e-09
																				Pcmt1	0.315224	1.49699e-21																		Ttc14	0.27132	1.37162e-09
																				Senp7	0.274675	1.76119e-21																		Gtf3c2	0.271796	1.40997e-09
																				Ppp4r3b	0.251253	2.40401e-21																		Usp14	0.284359	1.49462e-09
																				Klf3	0.264566	2.44173e-21																		Fhl2	0.342333	1.76877e-09
																				Foxp4	0.264025	2.45862e-21																		Eif2ak4	0.250816	1.82926e-09
																				Pptc7	0.259895	2.57723e-21																		Gm49336	0.252657	1.8476e-09
																				Afg3l2	0.280029	3.31849e-21																		Ubash3b	0.493945	1.86135e-09
																				Boc	0.260332	3.64554e-21																		Parg	0.276874	1.96514e-09
																				Parg	0.280872	3.97868e-21																		Timp3	0.289145	2.07061e-09
																				Atp2c1	0.342774	4.03511e-21																		Atg4b	0.289049	2.11302e-09
																				Myo1b	0.616188	4.08077e-21																		Arl8b	0.270165	2.29021e-09
																				Rbm10	0.250005	4.19027e-21																		Cdc42bpb	0.318497	2.36004e-09
																				Pcnp	0.253405	4.45619e-21																		Ube2e2	0.355667	3.0338e-09
																				Trpm7	0.357506	4.60935e-21																		Bcas2	0.256783	3.07024e-09
																				Atf2	0.386295	4.62575e-21																		Bag3	0.268682	3.10915e-09
																				Yme1l1	0.289971	5.20176e-21																		Setd3	0.26142	3.69095e-09
																				Dlst	0.263021	5.31083e-21																		Max	0.259344	3.6978e-09
																				Spast	0.276884	5.89128e-21																		Ptpn11	0.253783	3.82749e-09
																				Extl3	0.273686	5.94947e-21																		Zfx	0.262167	4.0216e-09
																				Rab3gap2	0.268716	6.32994e-21																		Tex10	0.285754	4.09877e-09
																				Irf2	0.321911	7.47871e-21																		Gm15987	0.440736	4.37139e-09
																				Bcar3	0.35505	7.73871e-21																		Pola1	0.343381	4.42112e-09
																				Usp33	0.289201	8.34386e-21																		Fars2	0.346776	4.95477e-09
																				Skint9	0.69343	8.65092e-21																		Pcmt1	0.282294	5.13759e-09
																				Zfp292	0.275509	9.10707e-21																		Zfp948	0.296206	5.14504e-09
																				Tpm1	0.417911	9.92954e-21																		Phc3	0.293201	5.40278e-09
																				Hpgds	0.47906	1.15788e-20																		Mzt1	0.252519	6.52573e-09
																				Map3k2	0.392101	1.23184e-20																		Aak1	0.28699	6.70966e-09
																				Kif2a	0.271711	1.28481e-20																		Csnk1g3	0.251093	6.83632e-09
																				Asxl1	0.331956	1.36994e-20																		Tgfbr1	0.366008	7.0353e-09
																				Cops2	0.280499	1.40151e-20																		Ccn1	0.542899	7.28862e-09
																				Sf3b6	0.261257	1.95045e-20																		Samd4	0.52578	8.19456e-09
																				Aff4	0.26353	1.96964e-20																		Kmt5b	0.280732	8.45539e-09
																				Zfp91	0.262493	2.19703e-20																		Fip1l1	0.266167	8.82417e-09
																				Dnajc13	0.296867	2.4546e-20																		R3hcc1l	0.263775	9.83001e-09
																				Nsmce2	0.30663	2.57556e-20																		Slc16a2	0.286434	1.06476e-08
																				Ccar1	0.265833	3.19286e-20																		Myh9	0.281791	1.09213e-08
																				Rad18	0.284162	3.36025e-20																		Klf9	0.289539	1.31117e-08
																				Clint1	0.410965	3.63351e-20																		Stim2	0.312654	1.36228e-08
																				Mfsd14b	0.266834	3.82878e-20																		Ints6l	0.280667	1.36533e-08
																				Rab3gap1	0.251671	4.22577e-20																		Asxl2	0.270541	1.41208e-08
																				Tab2	0.287288	5.52833e-20																		1810013L24Rik	0.272674	1.42169e-08
																				Bbx	0.421364	5.58893e-20																		Fosb	0.637465	1.91033e-08
																				Sin3a	0.270823	5.96824e-20																		Fbxl20	0.320845	1.99817e-08
																				Ipo11	0.282466	6.1588e-20																		Brwd3	0.332555	2.01866e-08
																				Socs7	0.256586	6.22057e-20																		Cdk12	0.266342	2.01971e-08
																				4833423E24Rik	0.286279	6.49481e-20																		Tspan5	0.305882	2.1027e-08
																				Hadhb	0.266274	7.71626e-20																		Dctn4	0.250371	2.23255e-08
																				Cog3	0.264641	8.46904e-20																		Dcun1d1	0.266106	2.76952e-08
																				Farp2	0.259587	9.86184e-20																		Pcmtd1	0.257166	2.77244e-08
																				Atf3	0.2945	1.01392e-19																		Pi4k2b	0.250069	2.9052e-08
																				Fam49b	0.57298	1.20901e-19																		Rsrc1	0.300479	3.03778e-08
																				Rnf24	0.381525	1.33104e-19																		Etf1	0.276885	3.65338e-08
																				Eps15	0.445218	1.70089e-19																		Akap10	0.297007	3.80366e-08
																				Pxk	0.322374	2.16219e-19																		Fosl1	0.370415	4.24995e-08
																				Smad2	0.290567	2.19896e-19																		Ksr1	0.336808	5.55943e-08
																				Smad3	0.398386	2.34015e-19																		Kat6b	0.328425	5.69815e-08
																				Diaph2	0.317697	2.57023e-19																		Dipk1a	0.266154	8.22677e-08
																				Rabgap1	0.260933	5.00026e-19																		Nfatc3	0.281461	9.1676e-08
																				Ttc3	0.307226	6.26586e-19																		Cdk7	0.277279	9.31835e-08
																				Phc3	0.295926	6.63965e-19																		Togaram1	0.269321	1.07383e-07
																				Stau1	0.310863	7.69013e-19																		Pak1	0.441578	1.17229e-07
																				Ifrd1	0.277668	9.6534e-19																		Ipo11	0.284315	1.18801e-07
																				Ddi2	0.31354	9.74545e-19																		Tasor2	0.276072	1.24162e-07
																				Ahnak	0.251693	1.35601e-18																		Dmtf1	0.264984	1.37394e-07
																				Immp2l	0.50923	1.60177e-18																		Topbp1	0.251133	1.56611e-07
																				Taf4b	0.298004	1.77025e-18																		Slbp	0.255191	1.69642e-07
																				Scfd2	0.310593	2.00579e-18																		Focad	0.259834	1.90188e-07
																				Lgr4	0.334422	2.22689e-18																		Zswim6	0.434301	2.52873e-07
																				Stambpl1	0.280838	2.60033e-18																		Ier2	0.332758	2.91376e-07
																				Rnf19a	0.261531	2.68714e-18																		Shroom4	0.269437	4.45157e-07
																				Tbc1d1	0.420641	2.704e-18																		Atf3	0.604473	4.63775e-07
																				Gnb1	0.306164	2.79234e-18																		Micall1	0.298377	5.04438e-07
																				Maea	0.256737	2.90038e-18																		Gk5	0.260833	5.28854e-07
																				Mapk8ip3	0.25028	3.03853e-18																		Mtx2	0.268437	5.75518e-07
																				Pacs1	0.507769	3.0896e-18																		Yaf2	0.295155	5.77522e-07
																				Chic2	0.276163	3.87873e-18																		Pgap1	0.308355	6.33288e-07
																				Abhd5	0.305124	4.02342e-18																		AW554918	0.301757	6.55847e-07
																				Fam172a	0.316316	6.31459e-18																		Kat2b	0.315789	7.34256e-07
																				Ube2r2	0.282169	6.96714e-18																		Dlst	0.25625	9.86543e-07
																				Hat1	0.276528	7.02477e-18																		Kif2a	0.285725	9.91966e-07
																				Supt20	0.292478	1.0331e-17																		Tshz2	0.336078	1.59675e-06
																				Ythdf3	0.261794	1.06864e-17																		Ppfia1	0.258492	2.72097e-06
																				Ptpn12	0.32493	1.16566e-17																		Myo1b	0.393132	3.11713e-06
																				Slc7a1	0.290551	1.34498e-17																		Itgb1	0.280683	3.17193e-06
																				Baz1b	0.263606	1.67046e-17																		Il20rb	0.30993	3.69048e-06
																				Adamts1	0.330519	1.72714e-17																		Iqsec2	0.320978	5.11558e-06
																				Pou2f1	0.392805	1.75011e-17																		Rnf24	0.256692	6.56381e-06
																				Plekhn1	0.258095	2.04754e-17																		Ube2e3	0.305145	1.27325e-05
																				F3	0.516836	2.3401e-17																		Gpcpd1	0.650906	1.28282e-05
																				Ctif	0.317776	2.55453e-17																		Id3	0.41546	1.62944e-05
																				Rad51b	0.451031	3.0345e-17																		Baz1a	0.257992	2.24862e-05
																				Lin52	0.291592	3.57384e-17																		Rngtt	0.285058	2.33053e-05
																				Arhgef10l	0.654259	5.22116e-17																		Ppm1l	0.36624	4.19368e-05
																				Alg13	0.293583	6.91647e-17																		Psen1	0.256035	4.75134e-05
																				Edem3	0.284955	7.9005e-17																		Igsf3	0.256413	5.40889e-05
																				Srsf10	0.271218	8.4312e-17																		E2f3	0.255515	5.62053e-05
																				Abhd2	0.293328	9.64901e-17																		Pik3c2a	0.36084	6.11711e-05
																				Hivep2	0.255042	1.77427e-16																		Ammecr1	0.287207	6.35384e-05
																				Ube3c	0.290322	1.80128e-16																		Fam234a	0.255435	0.000106261
																				Pex13	0.271249	2.2639e-16																		Btbd10	0.28379	0.000229295
																				Htra1	0.321607	2.34439e-16																		Phlda1	0.315663	0.000329822
																				Abtb2	0.756376	2.93158e-16																		Armh3	0.258286	0.000359384
																				Elf4	0.304622	3.6216e-16																		Atp2c1	0.263579	0.00037367
																				Jun	0.255205	6.84603e-16																		Lmbr1	0.254124	0.000621781
																				Ube2e3	0.306066	1.13568e-15																		Dnaja1	0.306885	0.00119865
																				Bin3	0.258166	1.55742e-15																		Xpr1	0.289258	0.00132954
																				Camk2d	0.308246	1.61029e-15																		Plpp1	0.479253	0.00161809
																				Vti1a	0.286535	1.67658e-15																		B4galt1	0.265437	0.00215991
																				Trio	0.264926	2.38513e-15																		Mitf	0.27698	0.00667674
																				Sbf2	0.2626	2.94914e-15																		Fam168a	0.252717	0.00972097
																				Rfwd3	0.257914	3.30033e-15																		Npas2	0.312982	0.0389753
																				Fbxo22	0.259274	3.45984e-15
																				Ndufs4	0.292973	1.52827e-14
																				Acox1	0.259727	1.77227e-14
																				Ccny	0.264515	2.75997e-14
																				Dlgap4	0.289146	3.00145e-14
																				Areg	0.292372	3.33209e-14
																				Ralgapb	0.256586	3.34078e-14
																				Ppp1r2	0.271569	3.53902e-14
																				Galnt1	0.268494	4.02704e-14
																				Chka	0.333359	4.81941e-14
																				Phldb2	0.482729	5.34965e-14
																				R3hcc1l	0.251308	5.69755e-14
																				Dnajc1	0.343775	5.98334e-14
																				Mad1l1	0.251014	9.01036e-14
																				Srgap2	0.278058	9.75829e-14
																				Zzef1	0.356867	1.29546e-13
																				Igfbp3	0.435188	1.31548e-13
																				Fxr1	0.370117	2.11091e-13
																				Dennd1b	0.322013	3.30523e-13
																				Prkce	0.32935	4.46872e-13
																				Caprin1	0.262482	4.69325e-13
																				Helz	0.299805	5.23553e-13
																				Vmp1	0.313831	6.97632e-13
																				Slc4a7	0.571452	1.1422e-12
																				Desi1	0.33581	5.43128e-12
																				Wwox	0.297565	5.60215e-11
																				Ccdc71l	0.268339	7.45382e-11
																				Rnf115	0.268867	7.56871e-11
																				Rbbp4	0.257177	1.20641e-10
																				Ugcg	0.58379	1.22862e-10
																				Ptk2	0.333575	1.29281e-10
																				Mboat2	0.848491	1.80092e-10
																				Kcnq1ot1	0.254464	3.18978e-10
																				Stag1	0.269058	4.8511e-10
																				Meis2	0.290775	1.00736e-09
																				Hs2st1	0.307546	1.33608e-09
																				Ano6	0.312429	2.57217e-09
																				Rnf169	0.276281	4.29754e-09
																				Fam168a	0.340036	5.51435e-09
																				Yaf2	0.255128	8.0597e-09
																				Blnk	0.411836	1.00304e-08
																				Atp11c	0.364238	1.45335e-08
																				Ddr2	0.446169	2.42679e-08
																				Schip1	0.343232	8.18907e-08
																				Svil	0.279241	1.88158e-07
																				Arhgap23	0.258335	1.08608e-06
																				Nsd2	0.288957	1.31699e-05
																				Top2a	0.446981	0.000604216
																				Mki67	0.502233	0.0123302

## Sheet: IMMUNE
Supplementary file 2b: Differential expression table of genes for immune population
Related to Figure 1C
Wilcoxon rank sum test run using the integrated dataset
M2-LIKE				TRM				DC/LC				TMEM				NEUT1				NEUT2
Gene	avg_log2FC	p_val_adj		Gene	avg_log2FC	p_val_adj		Gene	avg_log2FC	p_val_adj		Gene	avg_log2FC	p_val_adj		Gene	avg_log2FC	p_val_adj		Gene	avg_log2FC	p_val_adj
Pid1	3.24853	0		Cd74	3.17327	0		Cd74	4.817	0		Camk4	4.25424	0		S100a9	5.16944	0		Mirt1	2.88728	3.38569e-254
Arg1	3.06446	0		H2-Aa	2.91257	0		H2-Aa	4.70276	0		Grap2	4.04	0		S100a8	4.90085	0		Csf3r	2.94679	1.5749e-131
Pf4	2.84087	0		C1qa	2.85218	0		H2-Ab1	4.70072	0		Tox	3.97991	0		Cstdc4	4.55748	0		Sgms2	2.8953	3.56941e-104
Cxcl3	2.83451	0		C1qb	2.84619	0		H2-Eb1	4.67323	0		Skap1	3.45646	0		Srgn	4.16515	0		Pik3ap1	2.77611	1.96299e-86
Ctss	2.71274	0		Selenop	2.7793	0		Ccr7	3.45131	0		Itk	3.44086	0		Stfa2l1	4.02264	0		Sorl1	2.32725	4.53315e-86
F13a1	2.6228	0		H2-Eb1	2.73427	0		Cytip	3.21661	0		Ptpn22	3.34296	0		Hdc	3.9748	0		Xylt1	2.81033	1.27436e-84
Lyz2	2.56836	0		H2-Ab1	2.72307	0		Tbc1d4	3.21443	0		Cd247	3.33837	0		Slpi	3.92444	0		Alcam	2.60695	1.14626e-81
Cacna1d	2.49433	0		Mrc1	2.65589	0		Stat4	3.19453	0		Cd3g	3.13492	0		Retnlg	3.84154	0		Ankrd33b	2.48827	1.24811e-81
Ctsl	2.48683	0		C1qc	2.57741	0		Cd83	2.95821	0		Il2rb	2.8012	0		Acod1	3.75305	0		Hdc	2.2888	6.80539e-77
Abca1	2.47616	0		Lgmn	2.39483	0		Ramp3	2.81179	0		Trat1	2.67386	0		Csf3r	3.51178	0		Sell	1.89558	3.63598e-76
Hmox1	2.47023	0		Ms4a7	2.33892	0		Zfp366	2.59359	0		Sytl3	2.63993	0		Sgms2	3.42605	0		Sh2d3c	2.13242	2.06887e-75
Cybb	2.45317	0		Ccr5	2.29507	0		Gpr183	2.44637	0		Zmat4	2.56817	0		G0s2	3.41067	0		Fgr	2.40396	5.92771e-74
Ccl9	2.41039	0		Lyz2	2.18553	0		Ccl22	2.44361	0		Cd3e	2.55964	0		Ccl3	3.34327	0		Ptprc	2.21968	4.45088e-73
Zeb2	2.36393	0		Pltp	2.1654	0		Htr7	2.37291	0		P2ry10	2.5377	0		Entpd1	3.29722	0		Lilrb4a	2.10068	1.229e-70
Pdpn	2.3186	0		Apoe	2.1487	0		P2ry10	2.30705	0		Icos	2.53296	0		Pik3ap1	3.29496	0		Lilr4b	2.12852	2.64395e-68
Spp1	2.28166	0		Ifi27l2a	2.14738	0		Dapp1	2.29972	0		Ppp1r16b	2.50563	0		Igf1r	3.29249	0		Nedd9	2.74969	7.17851e-67
Fn1	2.24999	0		Ctsb	2.08159	0		Myo1g	2.20958	0		Ikzf3	2.17679	0		Gsr	3.2619	0		Apbb1ip	2.54332	3.70258e-66
Trim25	2.19723	0		Cd83	2.06664	0		Gpr132	2.14772	0		Cd7	2.13884	0		Antxr2	3.21019	0		Gm20528	2.65288	4.81546e-66
Cxcl2	2.17167	0		Laptm5	2.03988	0		Flt3	2.13146	0		Rundc3b	2.04818	0		Mirt1	3.16211	0		Gsr	2.47568	2.1548e-64
Psap	2.16113	0		Ctss	2.03677	0		Rnf157	2.01389	0		Card11	1.91936	0		Nedd9	3.13687	0		4732465J04Rik	1.75943	7.29298e-60
Lrmda	2.15949	0		Cd86	2.01247	0		Klrb1b	1.92122	0		Nkg7	1.87293	0		Sorl1	3.03539	0		Arg2	2.31591	2.23416e-59
Rbm47	2.10608	0		Itga9	1.97194	0		Klrd1	1.87049	0		Cd3d	1.87272	0		Mxd1	3.03214	0		Slc7a11	1.97339	4.20626e-58
Thbs1	2.0789	0		Csf1r	1.94529	0		Grk3	1.81878	0		Trdv4	1.87223	0		Lcn2	3.02122	0		Antxr2	2.44707	2.24056e-57
Lgmn	2.07471	0		Rbm47	1.88783	0		Grasp	1.80129	0		Cd2	1.8366	0		Sell	2.98037	0		Rps6ka2	2.45723	5.64807e-56
Ctsb	2.06082	0		Zdhhc14	1.88254	0		Bcl2a1d	1.79113	0		Cntn1	1.81409	0		Slc7a11	2.9396	0		Entpd1	2.18855	5.82909e-56
Cd36	2.04928	0		F13a1	1.87521	0		H2-DMa	1.75667	0		Trbc1	1.74702	0		Il1r2	2.8689	0		Neat1	1.39318	3.02751e-55
Zdhhc14	2.04197	0		Ftl1	1.86104	0		Pdcd1lg2	1.68901	0		Cxcr6	1.62253	0		Ankrd33b	2.86639	0		Igf1r	2.89098	4.10543e-54
Gramd1b	2.02632	0		Ctsc	1.85385	0		H2-DMb1	1.66217	0		Itgae	1.62067	0		Arg2	2.85988	0		Irak2	2.18838	9.79006e-54
Mitf	2.01488	0		Fcer1g	1.85102	0		Klri1	1.52772	0		Klrk1	1.60272	0		Xylt1	2.85865	0		Dock2	2.1068	3.07732e-53
Slc7a8	2.0082	0		Mdfic	1.82444	0		Runx3	1.5176	0		Themis	1.58749	0		Clec4d	2.84458	0		Gm26740	2.05719	1.45667e-51
Dock10	1.97504	0		Nceh1	1.81436	0		Gpr171	1.48627	0		Xcl1	1.58081	0		Lyst	2.83284	0		Il18rap	1.68196	8.73395e-51
Abr	1.97209	0		Aif1	1.81128	0		Napsa	1.4353	0		Sidt1	1.52823	0		Tyrobp	2.82336	0		Fgd3	1.90464	1.36019e-50
Trps1	1.93275	0		Mmp19	1.8102	0		Cbfa2t3	1.41752	0		Lck	1.51381	0		Ccr1	2.80381	0		Mir142hg	2.08468	1.29198e-49
Fnip2	1.91798	0		Trps1	1.8003	0		Klrk1	1.34084	0		Avil	1.50178	0		Clec4e	2.77473	0		Klra2	1.87365	1.66477e-45
Tnfrsf1b	1.86337	0		Dab2	1.74993	0		Sema7a	1.25934	0		Rhoh	1.49334	0		Lilrb4a	2.73752	0		Samsn1	2.09932	8.15492e-45
Mcl1	1.80882	0		Ms4a6c	1.73985	0		Tnfsf4	1.25643	0		Tcrg-C1	1.48732	0		Fgr	2.73305	0		Ripor2	1.74055	3.12491e-44
Mdfic	1.80249	0		Mpeg1	1.72851	0		Strip2	1.24663	0		St8sia1	1.43692	0		Dgat1	2.71969	0		Lyn	1.831	7.52784e-43
Plin2	1.80191	0		Trim25	1.72062	0		Mmp25	1.24549	0		Klrc1	1.21623	0		Il1b	2.71491	0		Lyst	2.58398	9.3416e-43
Mrc1	1.79132	0		Fcgr2b	1.71601	0		Ciita	1.22625	0		Ctsw	1.17854	0		Slfn4	2.71472	0		Malat1	0.903755	7.01393e-42
Dab2	1.77728	0		Snx24	1.70684	0		Siglecg	1.13422	0		Clnk	1.17545	0		Stx11	2.69337	0		Baz2b	1.83388	4.53595e-40
Cd86	1.77291	0		Adgre1	1.70206	0		Il21r	1.09021	0		Sh2d2a	1.16743	0		Resf1	2.68385	0		E230032D23Rik	1.55037	5.80969e-38
Grn	1.76858	0		Dock10	1.70015	0		Cd209a	1.08724	0		B3galt5	1.07949	0		Samsn1	2.67389	0		Slfn4	1.94155	2.42607e-37
Laptm5	1.76621	0		Psap	1.69892	0		H2-DMb2	1.0572	0		Cd96	1.02824	0		Sh2d3c	2.67371	0		Myo1f	2.13886	8.12887e-37
Btg1	1.74973	0		Slamf7	1.69377	0		Rtn1	0.967187	0		Sla2	0.907215	0		Lilr4b	2.60959	0		Chst11	2.02014	1.66743e-36
Ftl1	1.7426	0		Cd68	1.6908	0		Gm7247	0.95561	0		Jakmip1	0.900583	0		Rps6ka2	2.59451	0		Ccr1	1.6783	3.95016e-36
Slc16a10	1.73097	0		Grn	1.68167	0		C130026I21Rik	0.937397	0		Ptprcap	0.887265	0		Trem1	2.59076	0		Syk	1.63112	1.25441e-35
Msr1	1.72135	0		Cytip	1.68054	0		Dnah2	0.864351	0		Zap70	0.855244	0		Il1rap	2.57802	0		Srgn	1.29848	2.85859e-35
Pitpnc1	1.71821	0		Tnip3	1.67793	0		Cd72	0.8201	0		Prf1	0.835907	0		Cd14	2.57085	0		Cd300lf	1.59898	1.23998e-34
Cebpb	1.716	0		Ern1	1.67482	0		Gpr55	0.789619	0		Spn	0.824945	0		Bcl2l11	2.5349	0		Gab2	1.67836	3.55475e-34
Sash1	1.71197	0		Abca1	1.67399	0		Itgax	0.760848	0		Lat	0.711295	0		Cxcr2	2.50677	0		Gm42418	0.575403	4.06219e-34
Mpeg1	1.7074	0		Ms4a6d	1.66399	0		Rogdi	0.720266	0		Traf3ip3	0.656407	0		Plek	2.48412	0		Il1rap	2.34151	7.23669e-33
Osbpl8	1.70155	0		Apobec1	1.64843	0		H2-Oa	0.616611	0		Tbc1d10c	0.64881	0		Alcam	2.48387	0		Zfp608	2.06139	2.95252e-31
Lhfpl2	1.6866	0		Cxcl16	1.64125	0		H2-Ob	0.562787	0		Gm15472	0.56643	0		Fcer1g	2.47232	0		Acod1	2.12416	7.9812e-31
Ccl6	1.66876	0		Ccr2	1.62505	0		Ocstamp	0.553759	0		Gm43065	0.564176	0		Fbxl5	2.45948	0		S100a9	0.9859	1.88651e-30
Id2	1.63591	0		Ly6e	1.62307	0		Gm20513	0.474911	0		Txk	1.48291	1.13863e-293		Cd53	2.45689	0		Bcl2l11	2.05645	1.06489e-29
Pik3r5	1.62997	0		Pik3r5	1.6205	0		Il4i1	1.37487	2.08634e-302		Ripor2	2.97246	1.6938e-277		Ptprc	2.43518	0		Cmip	1.56643	1.1662e-29
Hilpda	1.62675	0		Gab2	1.61932	0		Map3k14	3.08045	6.27948e-297		Gprin3	1.47002	2.80056e-236		Fth1	2.43304	0		Camk1d	0.741161	2.98498e-29
Arhgap10	1.62509	0		Lyn	1.61705	0		Tspan13	1.66672	6.53549e-295		Klrd1	0.997442	4.3366e-232		Msra	2.42709	0		Osbpl9	1.78277	3.59201e-29
Vav3	1.62008	0		Slc8a1	1.5967	0		Cd86	2.76501	4.49641e-291		Serpinb6b	1.25241	2.59893e-228		Lmnb1	2.41397	0		Elmo1	1.86416	8.03025e-28
C1qa	1.61344	0		Cd14	1.59654	0		Traf1	2.82448	9.30552e-289		Ikzf1	2.25084	3.16233e-218		Mir142hg	2.39745	0		Iqsec1	2.03061	2.53744e-27
Apoe	1.60801	0		Cyba	1.59352	0		Serpinb6b	1.45654	1.60271e-286		Klrb1b	1.38362	4.07737e-216		Rdh12	2.37272	0		Lcp2	1.81394	3.19927e-27
Rbpj	1.59842	0		Syk	1.58729	0		Plxnc1	1.73548	3.04093e-282		Trpm6	1.29576	7.03552e-208		Cxcl2	2.34478	0		Gfod1	2.1614	1.25295e-26
Dennd1a	1.59374	0		C3ar1	1.58037	0		Havcr2	1.79624	3.79297e-282		Gpr55	0.734493	2.07927e-202		Nlrp3	2.34393	0		Gsap	2.01251	1.52966e-26
Cd93	1.58427	0		Rgl1	1.57838	0		Kit	0.866917	7.43914e-281		Tmem156	0.9722	2.13932e-185		Hcar2	2.3399	0		Mxd1	1.84793	1.80216e-26
Rgl1	1.58263	0		Npc2	1.57691	0		Cd80	2.23418	1.11874e-280		Acap1	0.722127	3.5475e-180		Pag1	2.33894	0		Fmnl1	1.52254	4.70306e-26
Gab2	1.57435	0		Pla2g7	1.5712	0		Zbtb46	1.6667	4.22105e-279		Arnt2	0.733633	2.53488e-178		Irak2	2.31406	0		Retreg1	1.93266	1.47121e-25
Fam20c	1.57377	0		Lst1	1.56806	0		Rhof	1.07294	5.79652e-277		Sytl2	1.46826	6.97831e-173		Cd52	2.30553	0		Diaph1	1.50423	4.60949e-25
Slc7a11	1.57042	0		B4galt5	1.56325	0		Il7r	2.36237	1.99513e-276		Runx3	2.32532	6.3291e-170		Txnip	2.29055	0		Btbd9	1.81358	1.72325e-24
Fcgr2b	1.56541	0		Unc93b1	1.5623	0		Alpk2	0.509331	4.50948e-275		Rnf157	2.99197	4.02721e-167		Lyn	2.28786	0		AY036118	0.879554	2.17667e-24
Alox5ap	1.55451	0		Basp1	1.5433	0		Zbtb18	1.50976	6.85801e-262		Gcnt1	1.87807	5.49862e-165		Tnfrsf23	2.28662	0		Itgam	1.76909	2.27208e-24
Fth1	1.5521	0		Mxi1	1.54297	0		Samsn1	2.47068	4.40115e-259		Il18r1	2.06845	2.71655e-164		Apbb1ip	2.27958	0		Spag9	1.08324	1.33988e-23
Atp2b1	1.5388	0		Zeb2	1.53809	0		Gm17276	1.61429	2.82313e-251		Gpr171	0.722287	6.10629e-160		Ifitm1	2.25448	0		Sema4d	1.90783	4.80626e-23
Eepd1	1.5298	0		Slc9a9	1.50926	0		Selplg	1.66084	1.20275e-250		Il12rb2	3.01831	9.37554e-158		Il15	2.25327	0		Morrbid	2.19886	7.48956e-22
Fmnl2	1.52754	0		Tyrobp	1.50528	0		Ctnnd2	1.07775	1.71344e-247		Tcf7	1.2105	6.47076e-156		Gm26740	2.24169	0		Cd33	1.50947	7.71419e-22
Sirpa	1.51673	0		Fnip2	1.48699	0		Snx20	1.18338	3.97502e-244		Stat4	2.87083	2.11448e-152		Lcp1	2.21224	0		Pag1	2.25553	3.53836e-21
Fmn1	1.51225	0		Tmsb4x	1.48281	0		Rnf180	1.46205	1.55749e-240		Fam174b	0.973531	7.14334e-150		Grina	2.20645	0		Msra	2.28025	7.31187e-21
Plek	1.50486	0		Cd52	1.48242	0		Il1r2	2.66488	2.25625e-238		Rinl	0.949671	1.76519e-149		Klra2	2.1666	0		Clec4d	1.04405	3.94256e-20
Tns3	1.50264	0		Arl4c	1.48045	0		Fyn	2.67868	9.0648e-233		Cyfip2	1.60607	3.15107e-147		Tpd52	2.15431	0		Atg7	2.27372	3.97664e-20
Itgam	1.50063	0		Ninj1	1.47819	0		Cd40	1.15528	1.75565e-231		Sept6	1.71066	5.36289e-143		Cd300lf	2.14555	0		Il1r2	1.53449	4.05601e-20
Rai14	1.49541	0		Tns3	1.47602	0		Arhgap45	1.04748	3.75179e-230		Itgal	1.03136	1.70376e-141		Slc11a1	2.13831	0		Fndc3b	1.24594	5.74328e-20
Pla2g7	1.49103	0		Efhd2	1.47156	0		Clec10a	1.14438	6.43264e-230		Pced1b	1.39404	2.56768e-137		Gfod1	2.12363	0		Cd300a	1.56975	1.31883e-19
Slfn2	1.48567	0		Ppm1h	1.47088	0		Cmtr1	1.90131	1.4973e-228		Trdc	2.65396	9.38688e-130		Mirt2	2.12248	0		Stx11	1.84031	1.46369e-19
Adgre1	1.48498	0		Sfmbt1	1.46651	0		Tnip3	2.45156	5.32676e-224		Ramp3	1.86014	8.28369e-128		4732465J04Rik	2.12199	0		Zeb2	1.05996	1.05257e-18
Ms4a6d	1.48065	0		Ctsz	1.46459	0		Lsp1	1.96848	8.39942e-221		Pik3cd	1.6581	2.35492e-127		Sp140	2.12153	0		Cd44	1.10835	3.89007e-18
Lcp1	1.47068	0		Lpin2	1.46429	0		Plscr1	1.30403	9.17094e-221		Rcsd1	1.32874	2.80776e-127		Klf2	2.10838	0		Notch2	1.6052	8.66114e-18
Clec4d	1.46847	0		Slfn2	1.45655	0		Prr5l	1.31237	9.63504e-220		Cytip	1.82092	3.68121e-120		Ncf2	2.09382	0		Babam2	2.01937	2.92754e-17
Syk	1.46799	0		Dclre1c	1.45423	0		Csf2rb	2.22511	9.32119e-219		Tnfrsf9	2.21095	1.89364e-117		Chst11	2.0804	0		Plek	1.26301	3.31128e-17
C3ar1	1.46604	0		Ifi30	1.44536	0		Stap1	1.64334	1.51684e-215		Arhgap25	1.64783	1.04367e-116		Mcemp1	2.07945	0		Resf1	1.9649	5.50376e-17
Csf1r	1.45564	0		Hexa	1.44463	0		Gpr137b	1.4771	1.9552e-214		Sept1	0.843645	2.54051e-113		Gda	2.06779	0		Cd53	1.18138	1.16351e-16
Cflar	1.45487	0		Got1	1.42914	0		Rgs1	2.101	3.84625e-212		Rhof	1.21305	2.13144e-111		Fpr1	2.06216	0		Ncf2	1.41784	1.17398e-16
Cd14	1.45446	0		Sestd1	1.42649	0		St8sia4	2.47034	1.47891e-207		Dock8	2.56501	6.76682e-107		Gsap	2.04956	0		Lcp1	1.21515	5.74742e-16
Sdcbp	1.45387	0		Spi1	1.41961	0		Mrtfa	2.58334	1.55319e-207		Rab4a	0.998226	4.38249e-99		Zfp608	2.02281	0		Kpna4	1.72706	6.67812e-16
Npc2	1.45019	0		Ly86	1.4159	0		Phlpp1	3.1131	3.66209e-201		Cd244a	0.942296	4.26247e-97		Slc2a3	2.01588	0		Mbnl2	1.40737	7.76296e-16
Cd38	1.44723	0		Fyb	1.4135	0		Coro1a	1.21408	2.46581e-196		Zeb1	3.26491	5.04778e-97		Emilin2	2.00937	0		Tnfrsf23	1.9909	1.00557e-15
Fyb	1.44436	0		Gna13	1.41201	0		Gpr68	0.799404	1.22085e-195		Il2ra	2.50426	1.17972e-96		Dop1b	2.00781	0		Slc11a1	1.56498	1.73533e-15
Ninj1	1.43243	0		Dennd1a	1.40887	0		Ifitm1	3.63407	1.23493e-194		Pde3b	2.40895	4.56975e-96		Snx20	2.00375	0		Suco	1.48194	9.39208e-15
Mtss1	1.4297	0		Trem2	1.40607	0		Cenpa	1.45349	9.75775e-193		Ptprc	2.51195	4.28749e-95		Wfdc21	1.99847	0		Sik3	1.37571	9.49319e-15
Clec4e	1.42944	0		Cd300c2	1.4039	0		Nrros	1.47598	5.38875e-192		Plekha2	1.7191	1.28825e-94		Smox	1.99653	0		Snx20	1.27866	1.0467e-14
Kcnk13	1.42895	0		Cbr2	1.4025	0		Csf2rb2	1.14508	9.66469e-192		Akna	0.950764	3.22329e-94		Sema4d	1.99282	0		Anxa11	1.71336	2.63368e-14
Wfdc17	1.42374	0		Ptpn18	1.40083	0		Syngr2	1.89786	2.82001e-191		Dock10	2.29884	1.46786e-92		Myo1f	1.99218	0		Hectd1	1.51429	1.1273e-13
Ctsd	1.42259	0		Tbc1d9	1.39484	0		AI662270	0.721464	6.09593e-189		AU020206	2.01006	4.87944e-92		Iqsec1	1.98731	0		Fbxl5	2.07066	6.1753e-13
Gna13	1.42115	0		Plin2	1.38264	0		Nr4a3	2.74461	8.13192e-188		Fmnl1	1.22843	8.37208e-92		Ifitm2	1.97968	0		Cd84	1.62234	1.19453e-12
Pstpip2	1.41677	0		B2m	1.37787	0		Itga4	1.98538	4.37932e-187		Itgb7	1.19897	5.47368e-91		Fam107b	1.97739	0		Gtdc1	1.88775	7.08264e-12
Sestd1	1.41499	0		Rab7b	1.36803	0		Edil3	1.65968	8.27982e-186		Ctnnd2	2.02367	2.34285e-89		Ntng2	1.97444	0		Smox	1.3081	8.30447e-12
Plekhm3	1.3931	0		Ifi207	1.35975	0		Cd52	1.98545	2.50511e-184		Adamtsl3	1.08952	2.77235e-89		F5	1.95588	0		Runx1	1.92299	1.94827e-11
Mdm2	1.39037	0		Plek	1.35331	0		Ly75	1.86976	4.7837e-184		Abcb1a	1.38092	1.17088e-87		Cd33	1.9473	0		Ccnl1	1.27276	1.96336e-11
Il1a	1.3692	0		Cebpb	1.34976	0		Gm26510	0.618895	1.36448e-183		Atp1b1	0.926811	1.6462e-87		Cd300a	1.93848	0		Il15	1.95362	3.07397e-11
Ms4a7	1.3664	0		St3gal1	1.34602	0		Pde3b	1.65084	2.91232e-183		Dennd4a	3.31222	1.01598e-85		Itgam	1.93508	0		Ankrd44	1.86463	3.48149e-11
Jarid2	1.36357	0		Sdcbp	1.33332	0		Slc38a1	1.21764	3.88133e-183		Ankrd44	2.38481	1.25419e-85		Osbpl9	1.93226	0		Kras	1.59031	3.56167e-11
Aoah	1.36159	0		Tank	1.3314	0		Lrrk1	2.10017	1.161e-182		Grap	0.690655	1.34701e-82		Fxyd5	1.93057	0		Inpp5d	1.38814	4.02661e-11
Vegfa	1.35647	0		Cybb	1.33052	0		Bcl2a1a	0.861858	4.21834e-182		Ighm	0.698783	3.40258e-82		Retreg1	1.92901	0		Rnf149	1.32466	1.39528e-10
Tbc1d9	1.35289	0		Lilr4b	1.32706	0		Mir142hg	1.30047	1.17877e-181		Slc38a1	1.74097	5.22483e-82		Slc15a3	1.92555	0		Bdp1	0.280042	2.30511e-10
Malt1	1.34107	0		Lamp1	1.3193	0		Nuak2	1.01388	1.68823e-178		Kdm2b	2.48538	1.70085e-81		Fgd3	1.92281	0		Cux1	1.53026	2.97738e-10
C1qc	1.33866	0		Ucp2	1.31692	0		Pik3r5	1.86141	2.06708e-176		Lpxn	1.52048	6.62843e-81		Gm43661	1.91858	0		Cd80	1.49268	4.38622e-10
Map4k4	1.33519	0		Lipa	1.31047	0		Rftn1	2.39004	1.63694e-175		Rgs1	2.88432	2.86475e-80		Slc40a1	1.91198	0		Atad2b	0.292317	4.87351e-10
Tlr2	1.33176	0		Specc1l	1.30996	0		Fam129a	1.57959	7.74928e-174		Runx2	2.18348	9.2154e-80		Sirpb1b	1.91164	0		Dleu2	1.57728	6.13518e-10
Cd84	1.33158	0		Trf	1.30977	0		Etv3	2.04017	2.79504e-171		Rnf125	1.35368	1.64274e-77		Sh2b2	1.90882	0		Tpd52	1.29854	7.63729e-10
Hexa	1.33036	0		Sdc3	1.3096	0		Ikbkb	1.53832	3.36026e-171		Pde7a	2.64832	8.61429e-76		Slfn1	1.9028	0		Dlg1	0.257055	1.10962e-09
Lamp1	1.32828	0		Nrros	1.3053	0		Pkib	2.15118	2.58832e-170		Gm16093	0.629445	3.1909e-75		Nudt4	1.90155	0		Il1b	0.987906	1.65483e-09
Mxi1	1.32269	0		Epsti1	1.30504	0		Arhgap30	0.836369	9.80081e-170		Lrmp	0.727685	7.72924e-75		C5ar1	1.90044	0		Chd7	1.37421	1.99677e-09
Trem2	1.30119	0		Gpr137b	1.30375	0		Akna	0.418058	2.21482e-167		Mir142hg	1.79326	1.29096e-74		Tlr4	1.89431	0		Tlr4	1.61679	2.12508e-09
Ctsz	1.29948	0		Sirpa	1.29643	0		Malt1	2.88512	3.57446e-167		Arhgap45	1.20939	3.61864e-74		Lcp2	1.89088	0		Maco1	0.330253	2.53443e-09
Apobec1	1.29683	0		Ms4a6b	1.29252	0		Dennd4a	2.44103	2.11224e-166		Ctla2b	0.706555	3.6357e-74		Baz2b	1.88498	0		Snx3	0.285028	2.53734e-09
Snx8	1.29206	0		Slc38a1	1.29178	0		Fmnl1	0.690645	4.76203e-165		Kcnma1	2.22049	6.73525e-74		Trim30b	1.86689	0		Hsp90aa1	0.28016	2.70069e-09
Sh3kbp1	1.29015	0		Arhgap18	1.29092	0		Spi1	1.24971	6.56105e-165		Rgs9	0.773808	3.43475e-72		Syk	1.86386	0		S100a8	0.897359	2.96085e-09
Myo5a	1.28576	0		Rilpl2	1.28831	0		Fam49a	1.23264	9.21147e-165		Vgll4	2.44232	1.47394e-71		Marcksl1	1.85809	0		Slc16a6	1.4769	3.34343e-09
Fndc3a	1.27929	0		Ccl12	1.28709	0		Wnt11	0.609269	1.4196e-164		Myo1g	0.972013	1.74183e-71		Cd9	1.84477	0		Amn1	1.58893	4.09697e-09
Efhd2	1.27908	0		Clec4a3	1.2832	0		Ifi30	1.9859	3.20648e-163		Acot11	0.909388	2.04297e-71		Hsd11b1	1.84317	0		App	1.02415	5.38085e-09
Ppm1h	1.27394	0		Fem1c	1.27992	0		Rel	2.17836	5.73763e-161		Tut4	2.09008	4.50432e-71		Cyp4f18	1.83674	0		Dgat1	1.7332	7.60932e-09
Basp1	1.2686	0		Fcrls	1.27498	0		Ms4a4c	0.801014	3.01752e-155		Ets1	2.46272	1.36118e-70		Rab7	1.83356	0		Cd9	1.02983	1.28533e-08
Rffl	1.26657	0		Rnf130	1.27217	0		Dusp2	0.781542	1.35732e-154		Selplg	1.32097	3.42266e-69		S100a11	1.83323	0		Btbd1	0.405924	1.53064e-08
C1qb	1.26304	0		Rab8b	1.26715	0		Etv6	2.23418	1.04362e-153		Ccdc88c	1.73014	1.57726e-68		Tnfrsf26	1.82913	0		Arhgap26	1.53068	2.03271e-08
Lrrc8d	1.26243	0		Cfp	1.26428	0		Basp1	2.06654	4.88139e-153		Neurl3	1.86569	4.81366e-68		Rab44	1.82464	0		Sh2b2	1.49665	3.63035e-08
Tnf	1.25991	0		Ptprc	1.2585	0		Pip4k2a	1.76224	4.28989e-150		Fnbp1	2.25998	7.5694e-68		Upp1	1.80503	0		Gm13986	1.5151	6.15542e-08
Cd68	1.25596	0		Clec4a1	1.25407	0		Snhg15	1.00763	2.37948e-149		Gpr68	0.859457	2.62145e-67		Plaur	1.79763	0		Optn	1.45033	6.68036e-08
Ctsc	1.25353	0		Rgs1	1.25343	0		Kif21b	0.606646	3.56333e-148		St6galnac3	2.79934	3.49643e-67		Il18rap	1.79476	0		Chd1	0.382488	7.34667e-08
Zmiz1	1.24938	0		Csf2rb	1.24512	0		Map3k1	1.63388	2.56643e-146		Il2rg	1.44588	6.88694e-67		Gm13986	1.78954	0		Selplg	1.30273	7.7467e-08
Nckap1l	1.24488	0		Por	1.24408	0		Cd274	2.20615	3.51494e-146		Inpp5d	1.74274	7.85856e-67		Selplg	1.7874	0		Flii	0.254224	9.88606e-08
S100a4	1.24114	0		Stap1	1.23483	0		Grb2	1.63137	4.4774e-146		Fgf13	1.61788	1.44309e-66		Cyth1	1.78294	0		Litaf	1.20228	1.03577e-07
Selenop	1.23749	0		Folr2	1.22958	0		Gins3	0.472062	2.84976e-145		Dock2	2.32765	3.39808e-66		Fcgr3	1.78097	0		Rab21	0.267246	1.19031e-07
Junos	1.23447	0		Epb41l2	1.22151	0		Plcl1	1.70468	1.78862e-144		Stk17b	1.97099	3.09529e-65		Dock2	1.77161	0		Gda	1.73608	1.47571e-07
Gnaq	1.23444	0		Arhgap15	1.21685	0		Lactb	1.12975	7.91563e-144		Ncald	1.05861	1.84388e-64		E230032D23Rik	1.76833	0		Add1	0.261713	1.52243e-07
Adam8	1.22575	0		Serinc3	1.21664	0		Rcsd1	1.17237	4.66147e-142		Atp8b4	2.05668	1.23686e-63		A530064D06Rik	1.76667	0		Samd8	0.286696	2.45534e-07
B2m	1.22447	0		Rnf149	1.21298	0		Foxn3	2.16896	9.76654e-142		Gng2	1.6954	9.2909e-62		Ets2	1.75036	0		Lrrc8d	1.35843	3.05763e-07
Lilr4b	1.22177	0		Tpd52	1.21013	0		Rap2a	1.36125	9.96354e-142		Vps37b	2.65408	1.17397e-61		Fmnl1	1.75009	0		Smchd1	0.335346	3.25422e-07
Card19	1.22069	0		Adap2	1.19399	0		Arrb2	0.694327	1.3304e-140		Satb1	3.08992	3.16061e-59		Fpr2	1.74719	0		Vav3	1.27846	3.65865e-07
Itgb2	1.21852	0		Cyth1	1.18725	0		Dock10	1.75933	2.12586e-140		Samsn1	1.4856	3.47022e-59		Ptafr	1.7118	0		Dennd4a	1.38161	4.19553e-07
Cd53	1.21608	0		Atp2b1	1.18572	0		Sp110	0.621372	1.01309e-139		Osbpl3	1.89873	2.85081e-58		Ripor2	1.69888	0		Zmym5	0.309608	6.18194e-07
Tank	1.21542	0		H2-D1	1.18337	0		Map4k4	2.05315	3.60863e-136		Prex1	1.65483	4.21303e-58		Lrg1	1.69494	0		Mapk1ip1l	0.263623	6.33407e-07
Cyba	1.21015	0		Inpp5d	1.18216	0		Aff3	2.1021	1.25633e-134		Fyn	1.88335	6.90983e-58		Themis2	1.67586	0		Rnf144a	1.68939	6.60945e-07
Nceh1	1.2065	0		Gpr132	1.18034	0		Slc8a1	1.7173	1.58173e-132		Gsdme	1.15308	9.70453e-58		Cd80	1.65923	0		Gpcpd1	1.45701	7.96226e-07
Clec4n	1.20432	0		Fcgr1	1.17823	0		Arhgap26	1.68781	3.42177e-131		Rab27a	0.984243	3.64788e-57		Gmfg	1.65636	0		Bcl2l13	0.267801	8.01656e-07
Cfp	1.19524	0		Pld4	1.17814	0		Irf8	1.70883	3.8143e-131		Mbnl1	1.8513	3.85164e-56		Snx18	1.64853	0		Icam1	0.301012	1.29016e-06
Gas2l3	1.18838	0		Alox5ap	1.17721	0		Gfpt1	2.06599	2.40696e-130		Arhgap30	0.982155	1.52721e-55		Neurl3	1.63596	0		Hadha	0.321504	1.53516e-06
Slc43a2	1.18791	0		Lcp1	1.17614	0		Epsti1	1.10483	3.03273e-130		Ptk2b	2.34619	1.54707e-55		4933432I03Rik	1.63179	0		Ubr4	0.339984	1.77503e-06
Lilrb4a	1.17899	0		Ccl9	1.17237	0		Pmaip1	1.3265	4.73943e-130		Emb	2.64706	9.81694e-55		Rnf149	1.629	0		Bcl2l1	1.45867	1.97852e-06
Sqstm1	1.17608	0		Rgs10	1.16865	0		Auh	1.19513	1.36155e-129		Crem	2.17127	1.68609e-54		Litaf	1.62644	0		Mpc1	0.499692	2.7188e-06
Itgav	1.17006	0		Emp3	1.16678	0		Antxr2	1.55811	6.98406e-129		Ctla2a	2.61584	4.7731e-54		Trem3	1.59014	0		Agpat4	0.268269	3.2022e-06
Ptprj	1.16908	0		Zmiz1	1.16594	0		B3gnt5	0.804277	2.37459e-126		Abcb1b	2.196	9.82803e-54		Diaph1	1.53759	0		Phip	0.276066	4.515e-06
Rilpl2	1.16882	0		Mcl1	1.16524	0		Tmsb4x	2.12722	1.14672e-125		Chd2	2.0149	3.79542e-53		Hectd1	1.52731	0		Clec4e	0.885539	4.82502e-06
Clec4a1	1.16704	0		Cxcr4	1.16361	0		Csf2ra	0.65329	2.26203e-125		Fam107b	1.81925	8.90564e-53		Csf2rb	1.52598	0		Stx5a	0.257458	5.30831e-06
Soat1	1.16302	0		Ctsa	1.15372	0		Cyfip2	0.544808	9.32582e-125		Fli1	1.58806	1.86157e-52		Dhrs9	1.49325	0		Hk1	0.276969	5.58288e-06
Creg1	1.16162	0		Gng2	1.14912	0		Il2rg	0.73141	5.79751e-123		Stk4	2.13939	4.19412e-51		Mmp9	1.49252	0		Ubr2	0.296369	5.61601e-06
Irak2	1.1599	0		Ptafr	1.14838	0		Zmynd15	0.798017	1.96751e-122		Serpinb9	1.20181	5.13818e-50		Rab8b	1.48774	0		Pla2g7	1.16156	6.67385e-06
Lrp12	1.15717	0		Zfp516	1.14668	0		Akt3	1.66729	2.42797e-122		Kcnq5	2.69799	6.3962e-50		Tlr13	1.47073	0		Tbc1d5	0.385516	7.41021e-06
P2rx4	1.15477	0		Lpxn	1.14577	0		Arl5c	0.89168	7.72248e-122		Celf2	1.6628	1.43366e-49		Gpat3	1.46132	0		Ap1g1	0.383681	9.38776e-06
Atp6v1a	1.15462	0		Slc15a3	1.14104	0		Prex1	1.1647	2.84688e-121		Rgs2	2.81798	4.49387e-49		Jaml	1.41879	0		Foxo3	0.310636	1.13503e-05
Atp6v1c1	1.15439	0		P2rx4	1.14042	0		Ncoa7	1.67794	3.08828e-121		Elmo1	1.77791	4.6833e-48		Btg1	1.41303	0		Cpeb4	0.302635	1.32238e-05
Ampd3	1.15113	0		Picalm	1.13769	0		Zmiz2	0.82007	5.29773e-121		Herc3	1.50071	6.76065e-48		2310001H17Rik	1.3786	0		Rnh1	0.265532	1.35989e-05
Abcc1	1.14384	0		Snx8	1.13166	0		Slc25a20	1.13942	3.13514e-120		Prkch	2.84153	7.51757e-48		Coro1a	1.37015	0		Atp8b4	1.36565	1.53097e-05
Bst1	1.13527	0		Cerk	1.12629	0		Rin3	1.20112	7.73653e-120		Tnrc6b	1.69462	1.02605e-47		Mefv	1.36305	0		Rp9	0.299036	1.59585e-05
Gas7	1.13374	0		Atp6v0c	1.12584	0		Pgf	1.00356	8.85371e-120		Fryl	2.23355	3.5531e-47		Rac2	1.35046	0		Zcchc7	0.313217	1.93047e-05
St3gal1	1.13295	0		Lmbrd1	1.11922	0		Psmb9	0.746569	7.81166e-119		Cmip	1.43259	3.62665e-47		Gm5150	1.337	0		Arnt	0.392121	2.04086e-05
Arl4c	1.13276	0		Pirb	1.11701	0		Gm2a	1.34262	4.08056e-117		Plcl2	1.28199	4.16609e-47		F630028O10Rik	1.33507	0		Rnf115	0.273863	2.30933e-05
Arhgap24	1.13211	0		Traf1	1.11394	0		Sp140	0.881217	8.34484e-117		Cenpa	1.33368	5.74745e-46		Ptgs2os2	1.32165	0		Rngtt	0.388224	2.3222e-05
Cyfip1	1.12662	0		Prex1	1.10687	0		S100a4	2.31041	9.0461e-116		Arhgap15	2.88539	1.04704e-45		9830107B12Rik	1.30966	0		Tfe3	0.252562	2.39969e-05
Sod2	1.11388	0		Lilrb4a	1.10393	0		Psmb8	1.31852	3.4966e-114		Nsd3	1.62986	2.06766e-45		H2-Q10	1.26176	0		R3hdm2	0.340412	2.66479e-05
Ptafr	1.11229	0		Kctd12	1.10103	0		Gucd1	0.637607	2.25239e-113		Bcl2	1.48021	2.26339e-45		4833407H14Rik	1.23713	0		Kif1c	0.328135	3.9965e-05
Unc93b1	1.11229	0		Ubl3	1.10058	0		Laptm5	1.22556	2.45256e-113		Ptpn7	0.578257	3.81936e-45		A530013C23Rik	1.18637	0		Neurl3	1.18948	4.28433e-05
Cxcr4	1.109	0		Tm6sf1	1.09703	0		Tmem123	1.96505	1.44197e-112		Pitpnm2	1.70119	9.81441e-45		Gm16556	1.01877	0		Cyth1	1.3491	4.57183e-05
Fnip1	1.10689	0		Slc7a8	1.09598	0		Fnbp1	1.90163	1.94178e-112		Rabgap1l	2.35406	1.72858e-44		Pglyrp1	0.999006	0		Ogt	0.325981	6.07306e-05
St18	1.10182	0		Sh3bgrl	1.09417	0		Wipf1	1.55872	1.06849e-111		Atp10a	2.44877	6.88012e-44		B430306N03Rik	0.971975	0		Shoc2	0.29671	6.40225e-05
Kdm7a	1.09992	0		Dock2	1.0814	0		Lmnb1	1.25109	2.46913e-111		Akap13	1.44977	8.93908e-44		Lilra6	0.949547	0		Kctd20	0.28764	6.45338e-05
Dock7	1.09838	0		Irak2	1.07971	0		Adap1	0.729102	1.43957e-110		Fyb	1.73236	9.17467e-44		Gm20406	0.904894	0		Grina	1.11053	6.46228e-05
Sdc3	1.0962	0		Cd300a	1.07886	0		Stk4	1.2989	3.30091e-110		Cers4	0.882941	5.80984e-43		Eif1	1.196	3.14659e-303		Gatad2a	0.274343	6.84905e-05
Gns	1.09511	0		Taok3	1.07133	0		Bcl2a1b	1.52243	1.22417e-109		Sla	0.89171	6.08483e-43		Rab11fip1	1.67931	5.90371e-303		Snx4	0.303807	7.40401e-05
Fam129b	1.09319	0		Fcgr3	1.06844	0		Arhgap15	1.55897	3.49875e-109		Smad7	1.50795	6.52411e-43		Ccl6	2.02454	7.6121e-302		Dop1b	1.73303	8.10906e-05
Sh3bgrl	1.09022	0		Arpc3	1.06612	0		Bach2	2.28632	1.337e-108		Sema6d	1.36861	1.31162e-42		Gm31718	1.38776	5.79494e-301		Arhgef3	0.352068	9.83907e-05
Plekho2	1.08893	0		Atp6v1c1	1.06312	0		Synj1	1.29755	6.42004e-108		4932438A13Rik	1.64843	2.04666e-42		Cd44	1.29507	9.99035e-299		Wdfy2	0.291352	9.90841e-05
Cbl	1.08428	0		Cd84	1.06135	0		Crem	1.1499	1.75838e-107		Traf4	0.715836	3.28493e-42		Fem1c	1.62757	1.50606e-296		Rnf216	0.423705	0.000100681
Cd83	1.08361	0		Ifi204	1.05658	0		Dock2	1.07603	3.76746e-107		Sipa1l1	1.89999	4.08369e-42		Cyth4	1.32821	7.35641e-296		Eif4enif1	0.392838	0.000104903
Dock4	1.08344	0		Gm2a	1.05404	0		Jak2	1.65503	4.76751e-107		Csnk1g3	1.72855	6.26362e-42		Pim1	1.47926	3.57296e-292		Trps1	0.953795	0.000108237
Bcl2a1b	1.07862	0		Clec4a2	1.053	0		Cst3	2.54417	1.30439e-105		Il18rap	1.3471	1.14634e-41		Fas	1.76181	4.5779e-292		Myo9a	0.255043	0.000113569
Lpin2	1.07802	0		Cd53	1.04595	0		Akap13	1.39733	5.94121e-105		Gm26740	2.53354	1.95704e-41		Cd300lb	1.35118	9.41052e-292		Srebf2	0.265633	0.000114393
Dazap2	1.07465	0		Plekho2	1.04527	0		Ncf1	1.04487	8.96676e-105		Gm50012	0.788516	2.48518e-41		Gm20528	1.18495	5.55242e-291		Cdc27	0.360685	0.000122415
Cd300c2	1.07188	0		Grb2	1.03913	0		Mllt6	0.855402	1.05475e-104		Hcst	0.709105	2.99374e-41		Gtdc1	1.90162	9.22504e-291		Ranbp2	0.325279	0.000155868
Fcer1g	1.07128	0		Cndp2	1.0381	0		Raet1e	0.590776	1.65527e-104		Arhgap26	1.37992	5.21535e-41		H3f3b	1.33841	9.95346e-290		Tmbim4	0.322958	0.000158857
Cndp2	1.06847	0		Gns	1.03773	0		Itgb7	0.488593	2.57873e-104		Pgm2l1	1.08939	1.19817e-40		Atg7	1.99847	5.34255e-289		Ilf3	0.300714	0.000174881
Sgpl1	1.06534	0		Pparg	1.03465	0		Taok3	1.09986	5.30199e-104		Nfatc3	1.64914	2.14796e-40		Il1f9	2.13169	1.95562e-288		Taok1	0.254101	0.000181432
Dmxl2	1.06289	0		Ms4a4c	1.02655	0		Nfkbie	0.871215	5.57931e-104		Zbtb25	0.673791	1.02214e-39		Anxa11	1.70175	4.45588e-287		Zfp516	0.415505	0.000191268
Xdh	1.06123	0		Soat1	1.02464	0		Sla	0.522959	7.31371e-104		Elovl5	1.379	1.67398e-39		Il1rn	2.00886	8.89437e-286		Tug1	0.298573	0.00025327
Sh3bp5	1.06123	0		Asah1	1.01317	0		Serpinb9	1.25348	1.11979e-103		Btbd9	1.67752	2.1298e-39		Itgal	0.981598	3.80024e-285		Yme1l1	0.323917	0.000253901
Fem1c	1.05974	0		E230029C05Rik	1.01299	0		Zfp516	1.31344	5.067e-103		Cnnm2	1.79497	2.71166e-39		Ostf1	1.5256	3.47256e-284		Lmbrd1	0.262261	0.000254011
Pirb	1.05811	0		Eepd1	1.0129	0		Ccr5	1.70523	1.12622e-102		Lcp2	1.0513	8.00531e-38		Ppp1r3b	1.11497	1.88617e-281		Npc1	0.302102	0.000269575
Tnfaip2	1.05736	0		Rftn1	1.01173	0		Zeb1	1.47483	2.1973e-102		Nr4a3	1.69964	2.25094e-37		Rab20	1.4931	2.21813e-281		Dync1i2	0.339688	0.00028021
Emp3	1.05723	0		Card19	1.01169	0		Tmem131	1.71874	6.49343e-102		Rin3	1.24036	2.25437e-37		Optn	1.58746	7.58758e-281		Kmt5b	0.459255	0.000292305
Rnf130	1.05709	0		Fermt3	1.00607	0		Runx2	1.52875	9.35069e-102		Havcr2	1.15736	3.62744e-37		Kras	1.56918	2.75252e-280		Gm12840	0.301125	0.000316612
Iqgap1	1.05665	0		Slc43a2	1.00433	0		Gm46224	0.781496	1.31402e-101		Coro2a	0.776115	5.8915e-37		Plin2	1.50268	1.50975e-278		Eya3	0.461976	0.000339629
Iqgap2	1.04465	0		Gas2l3	1.00144	0		Pik3cg	0.465169	9.10388e-101		Gpr183	1.03089	7.04819e-37		Notch2	1.52863	3.38874e-277		Kif1b	0.443818	0.000363761
Rnf149	1.04396	0		Cotl1	0.996225	0		Gm40645	0.373355	9.64673e-100		Rab8b	1.51263	7.88155e-37		Neat1	1.22341	4.776e-276		Mapk1	0.260301	0.000399526
Il7r	1.03657	0		Clec4n	0.994731	0		Acsf2	0.395955	9.42168e-99		Me2	0.93244	1.07374e-36		Suco	1.71108	1.10582e-273		Ppp2r2d	0.358685	0.000439931
Esd	1.03342	0		Stab1	0.990625	0		Pde4b	1.36216	1.54937e-98		Zbtb1	1.27762	3.3389e-36		Cd300ld	1.34116	2.47574e-272		Khdc4	0.402003	0.000453112
Irf2bp2	1.03123	0		Pxn	0.990204	0		H2afz	1.92615	1.58283e-98		Dgat1	1.79868	4.56044e-36		Mcl1	1.16949	1.27051e-268		Pias1	0.344914	0.000465622
Nlrp3	1.02637	0		Arhgdib	0.983095	0		Cxcl16	1.73166	1.77981e-98		Zc3hav1	1.66257	1.67536e-35		Ncf1	1.58173	1.5974e-267		Iqgap1	0.622649	0.000474075
Ccr5	1.02496	0		Tmem106a	0.979889	0		Cmip	1.19929	2.51884e-98		Isy1	1.486	2.63274e-35		Babam2	1.80894	3.19714e-266		Ubap2l	0.273244	0.000513188
Nrp2	1.02319	0		Ftl1-ps1	0.97013	0		Tyrobp	1.13837	6.22998e-98		Pag1	1.20229	2.8426e-35		Mrpl33	1.93478	6.31834e-266		Lsm14a	0.412661	0.000538287
Tbxas1	1.01723	0		Rnasel	0.966872	0		Tbc1d8	2.00325	8.58158e-98		Ssh2	1.60228	3.45812e-35		Chd7	1.56478	1.47615e-262		Cep350	0.506738	0.000574731
Dusp3	1.01379	0		Crem	0.96175	0		Dpp4	0.876299	1.28672e-97		Map3k14	1.23675	5.7201e-35		Cux1	1.69237	3.54398e-262		Azi2	0.251236	0.000583004
Itpkb	1.00908	0		Slc37a2	0.96	0		Rassf3	1.16848	2.09912e-97		Ikzf2	2.85078	6.95819e-35		Kpna4	1.68675	9.74476e-262		Dstyk	0.358874	0.000633648
Txnrd1	1.00817	0		Cd300ld	0.959181	0		Tmtc2	2.57995	3.00532e-97		Foxo1	2.57882	9.15734e-35		Adam8	1.50301	1.09865e-261		Cstf3	0.420528	0.000669136
Lpar1	1.00692	0		St18	0.945778	0		Alcam	1.4976	1.45982e-96		Ankrd11	1.21341	1.38968e-34		Dennd1c	0.926716	5.89869e-261		Mapk8ip3	0.317537	0.000705203
Spi1	1.0067	0		Emilin2	0.941878	0		Wnk1	1.9951	1.6887e-96		Trbc2	0.880537	2.53466e-34		Pla2g7	1.54255	9.27596e-261		Tapt1	0.289214	0.000728096
Alcam	1.00533	0		H2-DMb1	0.941118	0		Otulinl	0.751327	6.03141e-96		Eml4	1.43396	5.34928e-34		Tnfrsf1b	1.36258	2.7913e-258		Cbl	0.316141	0.000728284
Rassf4	1.0048	0		St6gal1	0.937454	0		Uvrag	1.52326	7.63978e-96		Sik3	1.3425	1.40771e-33		Bcl2l1	1.67071	3.46734e-257		Cyb5r4	0.358925	0.000760258
Rabep1	0.995235	0		Aoah	0.930757	0		Calm1	1.78135	7.91454e-96		Traf1	1.36601	2.61563e-33		Ddx6	1.49206	9.83364e-257		Cdyl	0.374272	0.000824854
Arap1	0.993862	0		Hpcal1	0.928541	0		Ero1lb	0.672853	3.82306e-95		Nfatc2	0.841271	5.56663e-33		Slc16a3	1.60045	3.04039e-255		Fam107b	1.4579	0.000894513
B4galt5	0.993571	0		Ncf2	0.923346	0		Dusp5	1.28102	1.61303e-94		Bach2	2.6034	6.44828e-33		Rhog	1.46117	1.66599e-254		Trim33	0.326661	0.000993581
Cyth1	0.987247	0		Slc11a1	0.921573	0		Swap70	1.53507	2.38785e-94		Hacd3	1.57592	1.88919e-32		Hp	1.37156	6.27975e-254		Atxn10	0.39646	0.000997141
Lgals3	0.987071	0		Plxnc1	0.921406	0		Aph1c	0.530736	2.47876e-94		H2-Q6	1.09553	3.34339e-32		Mir22hg	1.53152	6.2937e-254		Jak2	0.331488	0.00100062
Ctsa	0.984528	0		Tmem189	0.918987	0		Dennd5a	1.21717	2.62023e-94		Plscr1	1.07482	9.61226e-32		Lpcat2	1.69544	3.42565e-252		Ube2w	0.420362	0.00101833
Ptpre	0.984016	0		Rassf2	0.916339	0		Mcemp1	0.590492	9.49273e-94		Stat5b	1.88009	9.99999e-32		Gab2	1.41921	2.96243e-250		Mau2	0.416981	0.00102469
F10	0.983752	0		Coro1a	0.913238	0		Pld4	0.598497	1.1729e-93		Ndfip1	1.46902	1.07499e-31		Thbs1	1.72516	8.02661e-249		Abhd17b	0.492986	0.00102723
Tmem189	0.983349	0		Slc25a28	0.894975	0		Relb	1.52555	1.21092e-93		Sesn3	0.997445	1.70629e-31		Rnf144a	1.84473	1.02519e-248		Hbp1	0.30437	0.00105443
Tgm2	0.981081	0		Runx3	0.888603	0		Il1b	1.63896	5.49481e-93		Lcp1	1.00074	1.94317e-31		Cmip	1.36509	4.15373e-245		Ctcf	0.26386	0.00113443
Ifi207	0.980329	0		Msr1	0.887054	0		Irf5	0.72681	7.73362e-93		Stat3	1.45868	2.50586e-31		Gk	1.82025	1.94608e-244		Ncoa6	0.476777	0.00113801
Dock2	0.980043	0		Nckap1l	0.881065	0		Inpp5d	1.14498	3.65081e-92		Lrrc8d	1.44866	2.77526e-31		Nfe2l2	1.40866	1.56536e-243		Paxbp1	0.255414	0.00119454
Ptprc	0.975571	0		Vsir	0.875682	0		Pak1	1.32155	8.00893e-92		Bin2	0.572747	3.93301e-31		Hk3	1.08757	2.89667e-243		Hdac4	0.425437	0.00141071
Specc1	0.975196	0		Havcr2	0.874764	0		Baz2b	1.27095	8.70253e-92		D16Ertd472e	1.33324	7.87576e-31		Fam111a	1.40219	6.48723e-243		Mdm2	0.322255	0.00143172
Ms4a6c	0.973832	0		Ifnar1	0.874199	0		Tbc1d9	0.902597	2.26363e-91		Sh3kbp1	1.38821	1.41673e-30		Msrb1	1.70671	1.98265e-241		Cmss1	0.32172	0.00146658
Anxa4	0.97382	0		Prkcb	0.873969	0		Dennd1c	0.328912	3.49526e-91		Smap2	1.35384	1.54143e-30		Elmo1	1.47421	3.58045e-239		Kdm3a	0.267524	0.00168395
Slc38a6	0.971772	0		Vav1	0.872007	0		Sub1	1.29969	1.64717e-90		Nr3c1	1.92573	2.51185e-30		Dusp1	1.55425	8.56378e-239		Casc3	0.337137	0.0017539
Mfsd1	0.966681	0		H2-DMa	0.869526	0		Lyn	1.32878	2.40005e-90		Gem	1.98537	4.53132e-30		Lamp2	1.34779	7.09934e-237		Raf1	1.63891	0.00175923
Slc23a2	0.96565	0		Cd38	0.867541	0		Ikzf1	0.584715	3.50045e-90		Tmem123	1.27787	5.69874e-30		Morrbid	1.96769	9.28657e-235		Zfand3	0.882608	0.00180653
Edem1	0.965136	0		C5ar1	0.863174	0		H2-Q6	0.773198	1.00846e-89		Slc37a3	1.1626	6.48959e-30		Malat1	0.739842	9.82837e-234		Safb2	0.32737	0.00182736
B4galt6	0.962033	0		Irf8	0.856999	0		Nfkbid	0.744926	1.17816e-89		Srrm2	1.10724	8.92449e-30		Cox17	1.69022	1.22032e-231		Mapk6	0.369286	0.00187147
Rap1b	0.961427	0		Rasa4	0.853161	0		Rassf2	0.741723	3.2276e-89		Itpkb	1.80108	2.21043e-29		Cebpb	1.26522	1.51689e-229		Avl9	0.28152	0.00197136
M6pr	0.960904	0		Itgam	0.848576	0		Ccdc88a	1.50987	5.6838e-89		Fam129a	2.03821	2.37865e-29		Cd274	1.85805	1.01172e-227		Rtn3	0.270426	0.00200625
Mapkapk2	0.957564	0		Gla	0.84567	0		Ass1	0.84884	6.35879e-89		Arhgef6	0.76442	3.9306e-29		Ehd1	1.43137	1.85122e-224		Tgoln1	0.293929	0.00218566
Cd274	0.956925	0		Crlf3	0.840118	0		Il10ra	0.516591	1.98202e-88		Lncpint	1.41478	4.59452e-29		Myl12b	1.43837	8.65094e-224		Zfp652	0.309732	0.00222691
Snx18	0.95553	0		Man2b1	0.839364	0		Tmem120b	1.05014	2.21938e-88		Il7r	1.56074	6.59171e-29		H3f3a	0.918016	1.54746e-223		Sept7	0.298687	0.00228497
Lipa	0.954355	0		Gm46224	0.837259	0		Tctex1d2	0.505924	2.25423e-88		Sp4	1.12617	9.2773e-29		S100a6	1.48354	1.63519e-222		Rab8b	0.884846	0.00228896
Pltp	0.953844	0		Cyth4	0.827876	0		Ptprc	1.09729	3.18803e-88		Cblb	1.7414	2.11761e-28		Ncf4	1.07225	2.16514e-222		Mef2d	0.528671	0.00242516
Adap2	0.947887	0		2310022A10Rik	0.826912	0		Slamf7	0.588476	3.66716e-88		Hmces	0.90152	2.37431e-28		Itgb2	1.13557	3.63097e-220		Dmtf1	0.323896	0.00250607
St8sia4	0.947405	0		Lgals3bp	0.821328	0		Ankrd44	1.23931	5.87499e-88		Peli1	1.46329	2.4506e-28		Sik3	1.32071	7.73395e-219		Cacul1	0.402614	0.0025874
Prex1	0.942805	0		Rassf4	0.821198	0		Cntrl	0.720669	1.47885e-87		Rapgef6	1.37802	3.53648e-28		Ahi1	1.53313	6.1572e-215		Arhgap15	1.58352	0.002643
Slc15a3	0.941699	0		Irf7	0.819214	0		Madd	0.717638	1.90287e-87		Hip1r	1.1564	7.70281e-28		Nabp1	1.39263	5.14582e-214		Elk4	0.284084	0.00272036
Lpxn	0.939401	0		Arap1	0.816331	0		Sod1	0.995098	2.45872e-87		Prrc2c	1.09859	1.20639e-27		Spi1	1.21831	4.7068e-213		Sidt2	0.288055	0.00275177
Emp1	0.938819	0		Dusp3	0.813528	0		Rab43	1.03042	2.54899e-87		Def6	0.793148	1.52421e-27		Gpcpd1	1.5532	5.03e-213		Ulk1	0.434377	0.0027728
Apoc2	0.938735	0		Fcgr4	0.811264	0		Bclaf3	1.25335	7.21616e-87		Rac2	0.741227	3.99618e-27		Btbd9	1.82376	1.62355e-210		Nfe2l2	1.15452	0.00281834
Por	0.937387	0		Mefv	0.810904	0		Stat5b	1.24206	2.85077e-86		Cdc42se2	1.30232	4.81515e-27		Sdcbp	1.11392	1.42576e-209		Usp19	0.306546	0.00289938
Blvrb	0.937017	0		Plekho1	0.802049	0		Stat5a	1.30064	3.5238e-86		Raet1e	1.07537	8.07014e-27		Ubap1	1.48907	2.17287e-209		Senp2	0.277546	0.00313039
Atp6v1b2	0.930623	0		Nfkbie	0.799988	0		Cxcr4	0.664406	5.13592e-86		Stk10	1.12238	8.17091e-27		Snap23	1.41372	3.09927e-208		Zranb1	0.424897	0.0031763
Rab7b	0.930111	0		Iqgap2	0.794006	0		Coro2a	0.576522	8.89249e-86		Batf	0.975034	1.10001e-26		March7	1.21228	4.59398e-208		Prr14l	0.361554	0.00324388
Slc41a2	0.929202	0		Tcirg1	0.793459	0		Slc25a19	0.379135	2.66254e-85		Dennd5a	1.42223	1.35188e-26		Alas1	1.32189	1.8512e-206		Usp38	0.256014	0.00338407
Ifnar2	0.927398	0		Ifi209	0.78526	0		Thada	1.50927	6.40172e-85		Ago2	1.13785	2.535e-26		Btk	0.968676	7.84771e-206		Atp6v0d1	0.366884	0.00363099
Rnf128	0.92455	0		Gm34084	0.784607	0		Gosr2	0.730027	2.33098e-84		Dennd3	0.622204	5.70444e-26		Zeb2	1.11084	6.02373e-205		Myo1d	1.7192	0.00364189
Nus1	0.923445	0		Tgfb1	0.781383	0		Ttc7b	0.887856	3.04177e-84		Apobec3	0.860022	1.71905e-25		Rap1gap2	1.27343	6.32338e-204		Mapkapk3	0.355682	0.00365083
Lrp1	0.914346	0		Arrb2	0.780205	0		Rasgrp4	0.36329	4.32586e-84		St3gal6	0.896532	1.74191e-25		Raf1	1.72854	1.44075e-203		N4bp2l2	0.326522	0.00396632
Arg2	0.913995	0		Kcnk13	0.779629	0		Pik3r1	1.91149	4.95158e-84		Bpnt1	1.08856	2.6416e-25		Prdx5	1.27041	3.00469e-202		Plin2	0.960705	0.00442633
Atp6v0c	0.910379	0		Itgb2	0.776202	0		Stk38l	1.20087	2.09855e-83		Rhoq	1.91619	2.88506e-25		Fam71f2	1.14593	5.82072e-202		Stag1	0.256781	0.00443047
Ftl1-ps1	0.909195	0		Evi2a	0.771364	0		Gm38115	0.315142	3.26838e-83		Dock11	1.33103	5.66981e-25		Irak3	1.60087	1.87779e-200		Stk38	0.39654	0.00443379
Tcirg1	0.905363	0		Aph1c	0.7702	0		Isy1	0.885265	3.71193e-83		Tshz1	1.24928	8.35422e-25		Basp1	1.52759	1.79671e-199		Sp3	0.351648	0.00509494
Nrros	0.903741	0		Il10rb	0.766272	0		Pvr	0.876071	3.97253e-83		Zhx2	1.75574	8.43343e-25		Tmem38b	1.34209	1.85263e-198		Nrf1	0.451947	0.00517451
Rgs1	0.901065	0		Ms4a4a	0.763093	0		Prcp	0.871464	1.52186e-82		Mbd2	1.32141	9.22294e-25		Vasp	1.37013	8.46605e-198		Rab7	1.08909	0.00523866
Fermt3	0.899187	0		Otulinl	0.756734	0		Sh3bgrl3	1.21371	2.14614e-82		Uty	2.46436	1.13424e-24		Igsf6	1.26646	9.99796e-198		Ilrun	0.351267	0.00582399
Parvb	0.898991	0		Gmfg	0.750143	0		Abcc4	1.39752	3.28923e-81		Med14	1.49047	1.25195e-24		Tmem189	1.28205	6.79042e-197		Vps26a	0.322228	0.00639215
Hif1a	0.895494	0		Gpr65	0.747828	0		Bend4	0.805264	1.65357e-80		Ncoa2	1.30601	1.33525e-24		Por	1.3401	4.60369e-196		Zc3h12a	0.429728	0.00684207
Anxa5	0.894701	0		Ccr1	0.73993	0		Ctsz	1.00906	3.23601e-80		Thy1	1.28053	1.84898e-24		Slfn2	1.38689	1.94642e-194		Mpp5	0.382157	0.0069251
Emilin2	0.892375	0		Il10ra	0.738254	0		Lcp1	0.963242	4.95797e-80		Hsd11b1	0.597644	2.21526e-24		App	1.11145	2.57041e-194		Dcaf5	0.485375	0.00704454
Slc37a2	0.891966	0		Pou2f2	0.732122	0		Il18rap	0.53956	6.4023e-80		Ldlrad4	1.43057	3.30014e-24		Nfam1	0.902192	1.1847e-190		Wsb1	0.332837	0.0071102
Plcl2	0.890832	0		Hacd4	0.730931	0		Gab2	1.14708	9.91137e-80		Hs3st3b1	0.913728	3.79031e-24		Ell	1.39344	2.69333e-189		Tmcc1	1.9191	0.00712501
Epb41l2	0.890179	0		Arl5c	0.726756	0		Cyth4	0.6888	2.99511e-79		Mier1	1.22848	4.66512e-24		Ccrl2	2.0865	2.45238e-188		Tut4	0.474143	0.00720631
Igsf6	0.89007	0		Cd180	0.722044	0		Fgr	0.804553	4.89084e-79		Ppp3cc	0.907877	7.91554e-24		Sp100	1.51054	3.4625e-188		Jmjd1c	0.9995	0.00725409
Snx10	0.886926	0		Clec12a	0.718839	0		Nhlrc2	1.14361	5.36446e-79		Gtpbp1	0.958871	1.29128e-23		Fam114a1	1.38604	6.41281e-188		Ptafr	0.966496	0.00759735
Pim1	0.88687	0		Sh2b2	0.713343	0		Lrrfip1	1.04422	8.47199e-79		Ncor1	1.07692	1.86791e-23		Ccnl1	1.051	1.2231e-187		Chmp3	0.309168	0.00778178
Tmem106a	0.881774	0		Pik3ap1	0.698777	0		Aim2	0.492756	2.16711e-78		Dip2b	1.37739	2.24479e-23		Dennd4a	1.32731	4.54123e-187		Strn	0.460675	0.00795172
Dhrs3	0.881302	0		Renbp	0.693599	0		Bhlhe40	1.30407	2.683e-78		Prelid2	0.788865	2.49972e-23		Amn1	1.34619	8.34553e-186		Kdm5b	0.336184	0.00828524
Lat2	0.876146	0		Apoc2	0.688234	0		Rab11fip1	0.802075	4.21547e-78		Unc5b	0.763	2.80766e-23		Hck	1.30252	9.112e-186		Rnf11	0.52982	0.00886882
Elk3	0.871115	0		St6galnac4	0.687647	0		Cyba	1.0192	4.40056e-78		Tnfrsf18	0.815325	4.52463e-23		Ftl1	1.0339	1.18943e-185		Ero1l	0.529804	0.00918199
Vamp4	0.870817	0		Cd48	0.684874	0		Sdccag8	0.786456	5.09171e-78		Ccr2	1.40453	4.58578e-23		Arpc3	1.31283	2.82799e-185		March6	0.477848	0.00963142
Scpep1	0.867296	0		Galc	0.678295	0		Ptpro	0.396013	5.29765e-78		Madd	0.9587	5.23476e-23		Marcks	1.19719	4.65695e-185		Smarca2	0.441235	0.00998312
Ucp2	0.866823	0		Lat2	0.671328	0		Gdi2	1.15668	1.62142e-77		Clcf1	0.588458	1.93271e-22		Pilra	0.887883	1.22936e-183		Ncor1	0.303663	0.0110516
Fam49b	0.865704	0		Dnase1l1	0.666179	0		St3gal3	1.31284	1.65179e-76		Rnf138	1.25243	2.44725e-22		Ndel1	1.33882	2.40876e-183		Eif2s3y	0.380888	0.0110963
Atp8b4	0.865358	0		Hcls1	0.664282	0		Nr4a2	1.37084	1.6937e-76		Ppp1r12a	0.998909	3.22434e-22		Spag9	0.978463	8.15178e-183		Mvp	0.454685	0.0114045
Gpr137b	0.865291	0		Pla2g15	0.654722	0		Pcgf5	1.57848	2.78558e-76		St8sia4	1.33314	3.53774e-22		Dgat2	1.33704	3.09837e-182		Wdr26	0.451997	0.0118909
Nfe2l2	0.859099	0		Myo1f	0.652336	0		Syk	0.907439	5.67546e-76		Prkd3	1.19041	5.27629e-22		Slc16a6	1.32513	5.35058e-182		Rc3h2	0.490652	0.0119063
Bri3	0.858658	0		Daglb	0.650937	0		Hat1	0.742474	3.34718e-75		Crbn	0.829119	8.81376e-22		Vav1	1.15974	8.44664e-182		Fbxo30	0.343783	0.0124797
Mob3b	0.857743	0		Hck	0.648512	0		Naga	0.48065	4.11772e-75		Arap3	0.467661	9.67038e-22		Hcst	0.803441	1.3548e-180		Arl8a	0.402289	0.0125202
Gde1	0.853694	0		Nxpe5	0.637595	0		Ucp2	1.05178	7.533e-75		Birc2	1.00183	1.0567e-21		Csf2ra	0.989697	4.80172e-180		Lpcat3	0.580197	0.0126082
Stab1	0.849266	0		Irf5	0.635935	0		Plek	0.83305	1.2749e-74		H2-Q7	1.3205	1.65118e-21		Tmcc1	2.0209	1.41653e-176		Ankrd13a	0.422376	0.0126827
Cotl1	0.847579	0		Rac2	0.630022	0		Apaf1	0.973666	1.85899e-74		Myl12b	1.13153	2.06486e-21		Chd2	1.31109	1.05491e-175		Qsox1	0.390258	0.0130198
Emb	0.842138	0		Clec10a	0.628339	0		Got1	1.1504	6.62146e-74		Tgfbr2	1.22097	2.08293e-21		Mapkapk2	1.33334	2.18316e-175		Aftph	0.494825	0.014277
Rab8b	0.84008	0		Slc35f6	0.628095	0		Arih2	1.05396	1.16265e-73		Chsy1	1.08467	2.14282e-21		Fndc3b	1.05039	2.42211e-174		Mob4	0.353378	0.0145198
Rasa4	0.830238	0		Cd72	0.625012	0		Rgs10	0.777304	1.31163e-73		Heca	1.18674	3.42491e-21		Kctd12	1.33367	4.61665e-173		Asxl1	0.381386	0.0151768
Asah1	0.829802	0		Parvb	0.621452	0		Il2ra	1.06268	1.99764e-73		Rap1a	1.21255	3.69703e-21		Trim30a	1.48292	6.52835e-173		Sirt2	0.322825	0.0153748
Slc11a1	0.825644	0		G530011O06Rik	0.619328	0		Rgs2	1.25468	2.70444e-73		Dapp1	1.28846	4.11143e-21		Adipor1	1.18333	1.10327e-171		Xpr1	0.309113	0.01613
Ifi211	0.821715	0		Myo1g	0.616616	0		Gngt2	0.747882	4.72843e-73		Kansl1	1.11505	5.31195e-21		Jdp2	1.12864	1.57154e-171		Syne1	2.30252	0.0164131
Snx30	0.821607	0		Acp2	0.614236	0		Crlf3	0.795591	7.32795e-73		Trpv2	0.567208	6.79138e-21		Inpp5d	1.2351	7.88748e-169		Elf4	0.498674	0.0164137
Nampt	0.820722	0		Pstpip1	0.613401	0		Gramd4	0.636283	8.8401e-73		Prkca	2.26757	1.01159e-20		Cd84	1.34381	4.02143e-168		Dnaja1	0.313516	0.0166536
Notch2	0.819337	0		Gm21188	0.608215	0		Sipa1l1	1.52575	1.19101e-72		Mycbp2	1.00672	1.60564e-20		Arhgap30	0.936552	5.17068e-168		Etnk1	0.524424	0.0169248
Lcp2	0.817066	0		Csf2ra	0.604144	0		Ggta1	1.13612	1.36612e-72		Jmy	1.82468	1.67673e-20		Rasa2	1.50176	1.0007e-167		Rab8a	0.314249	0.0171132
H2-D1	0.817051	0		B3gnt5	0.603613	0		Zfp106	0.965732	1.69979e-72		Rasa2	1.60034	1.68143e-20		Vmp1	1.04505	3.85779e-167		Nr3c1	0.581959	0.0173176
H2-K1	0.813837	0		Tbxas1	0.598947	0		Mif4gd	0.584124	2.60943e-72		Wnk1	0.990392	1.84125e-20		Vps4b	1.24476	2.17332e-165		Itgb2	1.07086	0.0183557
Gng2	0.813237	0		Ncf4	0.598603	0		Tm6sf1	0.96881	8.96614e-72		Pak2	0.952531	1.89731e-20		Tes	1.46585	6.627e-165		Wdr37	0.258596	0.0189198
Dgkz	0.812033	0		Il2rg	0.582649	0		Dock8	0.744665	1.50116e-71		Gm20559	0.605733	1.95307e-20		Cytip	1.01499	1.62299e-164		Ptbp3	0.706653	0.0196289
Cux1	0.803588	0		Stard8	0.576478	0		Hivep1	1.08474	2.08547e-71		Elf1	1.03844	1.99419e-20		Polr2a	1.36073	1.64101e-164		Mapre2	0.397711	0.02128
Tpd52	0.800669	0		AB124611	0.573144	0		Tut4	1.08825	5.57127e-71		Smchd1	1.69126	2.45119e-20		Lasp1	1.31337	5.24283e-162		Pank2	0.31291	0.0216377
Atp6v0b	0.797688	0		AI662270	0.572832	0		Cfp	0.789947	7.73783e-71		Prkcb	1.32238	2.52013e-20		Cd24a	1.40551	2.4171e-158		Ascc3	0.396797	0.0221001
Gm2a	0.795811	0		Tmem8	0.57146	0		Mgat4a	0.571006	2.14689e-70		Faah	0.52451	2.99426e-20		Btg2	1.09415	2.08529e-156		Syap1	0.265087	0.0224741
Inpp5d	0.793762	0		Gm6377	0.570561	0		Pirb	0.436831	2.15412e-70		Rsbn1l	1.05919	3.07742e-20		Arhgap25	1.00173	4.95697e-156		Fam76a	0.348504	0.0225131
Tyrobp	0.79317	0		Cysltr1	0.567356	0		Ctss	0.610883	4.30352e-70		Samd9l	0.733317	3.53878e-20		Atf7ip	1.33076	6.79127e-156		Mtm1	0.449094	0.02268
Cd44	0.790752	0		Gpr183	0.566143	0		Donson	0.455105	4.59183e-70		Rapgef2	1.42207	3.69799e-20		Zfand3	0.953454	7.14807e-156		Usp4	0.399975	0.0242636
Arl8a	0.786388	0		Ncf1	0.561999	0		Sema4a	0.554031	1.22857e-69		4930523C07Rik	1.06616	4.3611e-20		Ier5	1.20248	1.95565e-154		Apaf1	0.254203	0.02457
Ncf1	0.78548	0		Mir142hg	0.542195	0		Golph3l	0.748709	1.59244e-69		Tnfaip8	1.53427	6.63419e-20		Ankrd44	1.60767	4.66026e-154		Fbxw7	0.389788	0.0256155
Slc6a6	0.783179	0		Neu1	0.537786	0		Epb41l2	1.07672	2.55053e-69		Rbm39	0.758976	6.89311e-20		Pirb	1.03812	1.38232e-153		Coro1c	0.403426	0.0266659
Zfand2a	0.782387	0		P2ry6	0.513195	0		Nckap1l	0.403552	6.59002e-69		Pip4k2a	1.52475	7.25811e-20		N4bp1	1.53174	7.86026e-153		Marf1	0.3068	0.0291393
Atp6v1e1	0.782343	0		Batf	0.503865	0		Ifnar1	0.842451	7.1664e-69		Dgkh	1.3703	7.79921e-20		Pde7b	1.49202	5.51159e-152		Stxbp5	0.732426	0.0294322
Rftn1	0.781196	0		Hfe	0.49315	0		Fermt3	0.498665	1.22048e-68		Cep120	0.923898	8.06155e-20		Gm16599	0.948997	1.90478e-151		Atrnl1	0.376701	0.0331776
Hacd4	0.779687	0		Slc28a2	0.490176	0		Sik3	1.02605	1.56578e-68		Ankrd12	1.28197	1.04218e-19		Ccl4	3.10021	4.73323e-147		Mbd5	0.62366	0.0340214
Ifnar1	0.777525	0		Abca9	0.476793	0		Arhgef2	0.700933	1.99243e-68		Msi2	1.49547	1.55591e-19		AI839979	0.822384	4.78205e-147		Slpi	0.656296	0.0346967
Sh2b2	0.776636	0		Cd40	0.463181	0		Ncf4	0.460252	2.80298e-67		Parp8	1.79949	1.8411e-19		Osm	1.19287	9.0204e-147		Cyfip1	0.426359	0.0347157
Rassf2	0.775601	0		Tlr7	0.460811	0		Pik3r6	0.711416	4.15173e-67		2011-09-01	1.04027	1.88448e-19		Dusp5	1.23353	2.43399e-146		Usp15	0.481035	0.0358391
Akr1a1	0.775315	0		Lair1	0.460328	0		Arhgef10	0.782081	4.72745e-67		Rcc1l	1.42754	2.80689e-19		Il10rb	1.14887	6.41432e-145		Bbx	0.542245	0.0360669
C5ar1	0.773497	0		Lrrc25	0.446951	0		Rab8b	1.0506	4.80376e-67		Slc7a1	1.14844	2.96961e-19		Bst1	0.976059	1.38044e-144		Ppt1	0.38741	0.0386843
Rbms1	0.767067	0		Rab3il1	0.446394	0		Tmem39a	1.47044	6.35888e-67		Rbm33	0.949917	3.01336e-19		Tut7	1.16561	1.438e-144		Rnf24	0.258657	0.0396073
Il10rb	0.763477	0		Gm13391	0.44003	0		Ago2	0.870907	3.60254e-66		Dapk2	1.01231	3.17811e-19		Trpv2	0.975406	2.18452e-144		Homer1	0.657515	0.0407615
Slamf7	0.760272	0		Susd3	0.439473	0		Mvp	0.72535	3.86887e-66		Kmt2a	1.15196	6.26102e-19		Gabarap	0.842162	2.38501e-144		Siah1a	0.310804	0.0408968
A930007I19Rik	0.760156	0		Arhgap45	0.433837	0		Smchd1	1.37633	9.06441e-66		Iqgap2	0.770018	6.54921e-19		Sirpb1c	0.864386	3.73932e-144		Usp34	0.287611	0.0411517
Dnase1l1	0.755135	0		A630001G21Rik	0.425705	0		Crlf2	0.384851	9.09946e-66		Farp1	1.06591	6.60962e-19		Alox5ap	1.0045	6.78166e-144		Ski	0.503641	0.0412948
Tm6sf1	0.751577	0		Ly9	0.40792	0		Ubl3	1.00617	1.19009e-65		Smad3	1.19281	7.47475e-19		Rab31	1.39976	8.54212e-144		Sp140	1.22589	0.0422424
Ikbke	0.747574	0		Wdfy4	0.400697	0		Casc3	0.799949	1.68261e-65		Arap2	1.56509	7.91948e-19		Lrrc25	0.772064	1.78969e-143		Zfp106	0.511341	0.0435338
Fxyd5	0.746078	0		Milr1	0.388052	0		Traf6	0.852016	4.7473e-65		Bend4	1.31736	1.0611e-18		Arhgap26	1.231	2.51932e-143		Etf1	0.433841	0.044147
Golph3l	0.740294	0		Ptpro	0.382708	0		Apobec3	0.598119	9.06479e-65		Jak1	1.02158	1.41184e-18		Spata13	1.07126	3.6969e-142		Acsl4	0.285768	0.0458984
Rusc2	0.739263	0		Nlrp1b	0.363614	0		Plekho1	0.523126	1.09543e-64		Sp100	0.890987	1.8608e-18		Nt5c2	1.3889	9.56784e-142		Rictor	0.339924	0.0461551
Csf2rb	0.739124	0		Rasgrp4	0.358627	0		Ddx6	0.876533	1.12338e-64		Tmem243	1.08968	1.92661e-18		Card19	1.17491	1.0466e-141		Ttc19	0.403842	0.0484116
Renbp	0.725502	0		Itga4	0.34296	0		Actb	1.12619	1.45152e-64		Zdhhc2	0.891129	2.538e-18		Efhd2	0.993028	1.82668e-141
Ms4a4a	0.725159	0		Ticam2	0.336653	0		Dnajb14	0.646528	4.70888e-64		Reps1	1.33418	2.57252e-18		Ltb4r1	1.15261	2.40691e-141
Vsir	0.722338	0		Il21r	0.32947	0		Psme1	0.914164	1.03602e-63		Rab43	0.814329	2.87647e-18		Rin3	1.08782	9.95978e-139
Slc8b1	0.720299	0		Tmem37	0.324889	0		St3gal1	1.08052	1.24462e-63		Ccnd2	0.9677	4.12357e-18		Lst1	1.09137	2.25768e-137
Tfec	0.716889	0		Was	0.313193	0		E230029C05Rik	0.805502	1.48814e-63		Swap70	1.41173	4.38174e-18		Trim12a	1.04604	6.07729e-135
Adssl1	0.715955	0		Cmip	1.16586	1.153e-303		Cystm1	0.48831	2.11401e-63		Vrk1	0.733824	5.65419e-18		Ubc	0.804788	1.56548e-134
Ncf2	0.715783	0		Fgl2	0.975315	1.25574e-303		Satb1	1.57459	2.02873e-62		Kmt2e	0.940542	8.45746e-18		Cxcl3	1.27894	2.86404e-133
Osm	0.708194	0		Gnpda1	0.447925	3.60397e-303		Vav3	1.27641	2.71622e-62		Mctp2	1.8303	1.24222e-17		Mbnl2	1.18438	8.21745e-133
AI504432	0.707295	0		Scpep1	0.897017	3.8358e-303		Srgn	0.322438	4.55591e-62		Ppp1cc	1.04558	1.25268e-17		Map1lc3b	1.10446	1.53392e-132
Fcgr3	0.706801	0		Adcy7	0.579026	1.71348e-302		Pot1b	0.611063	4.88007e-62		1810026B05Rik	1.08444	1.42922e-17		Dusp16	1.80386	1.20304e-131
Cdc42	0.706476	0		Cd300lb	0.483946	8.99881e-302		Ifi209	0.446686	6.44125e-62		Akt3	1.26433	1.48031e-17		Aim2	1.01388	7.95653e-131
Lyn	0.705588	0		Grik3	0.449975	2.41663e-301		Mpc1	0.806596	7.2335e-62		Aak1	1.15304	1.86709e-17		Wwp2	1.27398	2.96062e-130
Sel1l3	0.696845	0		Bst2	0.882622	1.21937e-300		H2afy	0.890367	7.2791e-62		Phc3	0.997074	3.28141e-17		Stk17b	1.4218	1.53875e-129
Kcnn4	0.694902	0		Tnfrsf11a	0.873256	1.86739e-300		Iscu	0.658631	7.85091e-62		Plekha5	1.03881	3.42842e-17		Gpr132	0.96587	3.21607e-129
Aif1	0.694347	0		Ifnar2	1.09065	4.54219e-299		Spag9	0.956954	9.02876e-62		Dock5	0.934747	4.18587e-17		Rbks	0.993097	3.61871e-129
Ankrd33b	0.694255	0		Cyp4f18	0.389685	1.00411e-298		Pank2	0.724169	3.21463e-61		Fgd3	0.400022	7.29191e-17		Tmsb4x	0.706214	5.26047e-129
Ccrl2	0.693297	0		Pdxk	0.551458	1.75459e-298		Wdfy4	0.539556	4.12506e-61		Arl6ip5	0.97158	7.48053e-17		Ptbp3	0.790001	6.1424e-129
Hcls1	0.689623	0		Cd93	0.917229	1.00513e-296		Stxbp3	1.00355	5.79586e-61		Zc3h13	1.66785	7.55944e-17		Runx1	1.52801	3.00766e-128
Pacs2	0.689469	0		Tnfsf13	0.387681	6.34126e-296		Birc2	0.96294	3.46574e-60		Gch1	1.06627	1.37755e-16		Selenon	1.14256	5.50421e-128
Itgb7	0.686317	0		Lncpint	1.15842	6.01416e-295		Fam49b	1.02619	4.34977e-60		Rapgef1	0.958389	2.32982e-16		Asprv1	1.16051	2.31126e-127
Clec4a2	0.684251	0		Itm2b	1.29823	7.44897e-295		Baz1a	0.808068	5.76249e-60		Git2	1.07238	2.72339e-16		Pira2	0.827334	2.86391e-127
Lst1	0.682857	0		Tnfsf12	0.509253	1.08985e-294		Lrrc8d	1.0003	7.67974e-60		Cerk	1.09955	3.22391e-16		A330023F24Rik	1.0282	5.1207e-126
Acp2	0.682394	0		Creg1	1.03121	1.95728e-294		Ifngr2	0.61773	8.13277e-60		Lrrc8c	1.11445	3.50264e-16		Vps37b	1.48851	9.77699e-126
Gpr132	0.678898	0		Rassf3	0.83849	3.83981e-294		Ptafr	0.704991	9.25767e-60		Elf4	1.02861	3.52201e-16		Tnrc6b	1.45399	1.16339e-125
Bend4	0.670886	0		Ednrb	1.30413	7.03458e-294		Mthfs	0.626687	1.06736e-59		Laptm5	0.751629	4.16715e-16		AA467197	0.875665	1.37464e-124
Myo1f	0.668809	0		Zfp703	1.07738	7.12641e-294		Smim3	0.638092	1.1341e-59		Zdhhc18	0.830618	5.1884e-16		Gla	1.06734	2.64078e-123
Neu1	0.66136	0		Blvrb	0.989273	1.56798e-291		Cyfip1	0.929363	1.27202e-59		Tnfaip3	1.22721	5.21395e-16		Pfkfb3	1.29267	3.51615e-123
Cd300ld	0.658802	0		Ap1s2	0.703315	2.10562e-291		Gpsm3	0.375377	1.58943e-59		Gramd1a	0.660951	5.37678e-16		Lamb3	0.817335	1.80555e-122
Ptpn18	0.65727	0		Gusb	0.598623	3.43353e-291		Tent5c	0.336102	4.70525e-59		Cd48	0.440182	5.74524e-16		Nsd3	1.08436	6.10934e-122
Apbb1ip	0.65513	0		Osbpl8	1.33334	4.64171e-291		Tnip2	0.721233	8.29352e-59		Mgat5	1.62428	6.82564e-16		Fcgr4	0.772643	7.70827e-121
Fcgr1	0.648179	0		Map4k4	1.27762	6.662e-291		Limd2	0.38332	1.32428e-58		Unkl	0.754312	6.88424e-16		Atp6v0c	1.01987	2.72366e-119
Cd48	0.647763	0		B4galt6	0.629692	9.66831e-291		Kdm6b	1.03609	2.39352e-58		Dgkd	0.793002	7.68473e-16		Rffl	1.255	1.08347e-117
Folr2	0.643369	0		Pip5k1c	0.604867	3.53588e-290		Zfp263	0.581523	2.84634e-58		Clcn3	1.14678	1.02647e-15		Gadd45a	1.20279	5.66848e-116
Atg4c	0.640923	0		Pacs2	0.623865	6.85377e-290		Hcls1	0.363126	2.91571e-58		Tgfb1	0.890075	1.18751e-15		Kansl1l	1.59118	5.77318e-115
Plekho1	0.638598	0		Vamp4	1.001	7.35817e-290		Zfand3	0.898341	4.44684e-58		Cyth1	0.862115	1.27144e-15		Lrrfip1	0.961308	1.14393e-114
B3gnt5	0.632584	0		Sgpl1	1.04788	1.11363e-289		Dapk1	1.23298	5.39692e-58		Tecpr1	0.880539	1.32873e-15		Hcls1	0.886622	1.70008e-114
AI662270	0.626371	0		Plcl2	0.73479	2.14207e-289		Stk17b	0.908744	6.59506e-58		Dennd1b	1.22172	2.40349e-15		Klf3	1.18987	1.83795e-114
Mefv	0.622755	0		Etv6	1.38938	2.54122e-289		Crtc3	1.01508	6.88147e-58		Slc1a5	0.811274	2.80172e-15		Lrrc8d	1.12709	9.4235e-114
Cd37	0.621799	0		Oasl1	0.804531	1.2788e-288		Fau	0.743501	9.20764e-58		Usp36	1.01919	3.34548e-15		Pts	1.08663	3.2041e-113
Traf1	0.61328	0		Crlf2	0.432752	1.53318e-287		Osgin2	0.654389	1.19898e-57		Lats2	1.09989	4.01139e-15		Pdlim7	0.969956	9.46918e-113
Il10ra	0.610366	0		Adssl1	0.497066	1.00122e-286		Epb41	1.0816	1.21125e-57		Orai1	1.04103	5.28991e-15		Birc3	1.2528	1.96819e-112
Gm21188	0.605088	0		Itpkb	1.2006	7.6839e-286		Atmin	0.393794	2.22653e-57		Galnt6	0.737665	6.6191e-15		Snx10	1.21472	9.374e-111
Hck	0.601305	0		Pid1	0.826932	9.26492e-286		Gpd2	1.0603	2.50323e-57		Saraf	1.01875	6.73523e-15		Kdm6b	1.04788	1.47916e-110
F7	0.600497	0		Fth1	1.11385	9.42352e-286		Bin2	0.266201	3.92357e-57		Herc1	1.14477	9.78336e-15		Adgre5	1.23229	1.56016e-110
Irf5	0.59532	0		Id2	1.11474	2.32285e-285		Aftph	0.778588	4.95169e-57		Elmsan1	1.26684	1.10798e-14		Arhgap15	1.30089	3.53961e-110
Pik3r6	0.592786	0		Igsf6	0.476898	2.91172e-285		Pkn1	0.352617	6.1295e-57		Rb1	1.1418	1.14962e-14		Klf7	1.09199	6.73961e-110
Vav1	0.577956	0		Tnfrsf1b	1.07189	3.34706e-285		Usp12	0.774313	7.8271e-57		Ssbp3	0.953289	1.64838e-14		Trib1	1.17075	1.67515e-107
Glipr1	0.57484	0		Csf2rb2	0.557788	2.48541e-284		Lrrc8c	0.720277	1.33263e-56		Gna13	1.15801	1.70159e-14		Nab1	1.1256	2.38396e-107
Cd300lb	0.572561	0		Rcbtb2	0.682606	3.07112e-283		Mpp7	1.45347	1.80501e-56		Epb41l2	1.12462	1.8045e-14		Atp8b4	1.15535	7.38924e-107
Mctp1	0.565764	0		Cd37	0.414319	4.88446e-283		Ptger4	0.888255	2.13947e-56		Lyn	1.22191	2.24742e-14		Lrrfip2	0.959337	1.40316e-106
Pstpip1	0.563822	0		Zfand2a	0.736856	1.05024e-282		Gm16599	0.435605	2.19419e-56		Dbf4	0.602845	2.5037e-14		Myo1d	1.55377	2.1037e-105
Tnip3	0.56278	0		Cenpa	0.730876	3.67684e-282		Pira2	0.34271	2.99519e-56		Prag1	1.32372	2.54582e-14		Cap1	1.00431	5.96209e-104
Gmfg	0.555762	0		Mfsd1	0.783599	5.53138e-282		Elovl5	0.71136	4.33031e-56		Mpp6	1.80869	2.68666e-14		Dmxl2	1.13251	7.90402e-104
Dpep2	0.540508	0		Vav3	1.23361	2.66685e-281		Cyld	0.893077	6.01672e-56		Crebbp	0.81077	3.12412e-14		Glrx	1.12431	1.0512e-103
Clec4a3	0.524513	0		Gdf15	1.14347	9.56653e-281		Bri3bp	0.412951	1.03505e-55		Spata13	0.851154	3.41403e-14		Znrf1	1.14815	1.62218e-103
Coro1a	0.52121	0		Arhgap30	0.438159	2.48022e-280		Id2	1.12084	1.0696e-55		Crtc3	1.14805	3.88162e-14		Psd4	1.11882	1.86982e-103
Irf8	0.506973	0		Lcp2	0.606848	3.97693e-280		Ly86	0.422058	1.40442e-55		Ciapin1	0.680216	4.84994e-14		Wipf1	1.26047	1.45332e-101
Cmklr1	0.506786	0		Snx18	0.887354	6.54708e-280		Pmvk	0.667485	3.09227e-55		Rps6ka3	1.00185	5.04758e-14		Pkm	0.699674	3.62191e-101
Ncf4	0.503825	0		Myo5a	1.213	1.49626e-279		Tnfaip8	1.08968	3.68666e-55		Dnaja1	1.27645	5.20258e-14		Tgm2	1.07462	2.66727e-100
Lair1	0.49868	0		Atp8b4	0.660668	2.19025e-279		Plbd1	1.20153	4.65914e-55		Mtmr12	0.877523	7.6803e-14		Pnrc1	0.899848	3.75085e-100
Cd300a	0.495394	0		Ccrl2	0.789415	1.71957e-278		Fbxo11	0.991636	6.55408e-55		Epsti1	0.965944	8.90982e-14		Bcl6	1.04965	1.03283e-99
Cyth4	0.492882	0		Atp8a1	0.753721	7.59063e-278		Tmem176a	0.847838	7.46923e-55		Riok1	0.916341	9.33165e-14		Riok3	1.03484	1.47312e-99
Pira2	0.486611	0		Arhgef6	0.337777	8.14206e-278		Foxp1	1.10181	8.51243e-55		Abhd2	0.980806	9.8511e-14		Glipr2	0.958178	3.12855e-99
Naip2	0.479379	0		Osm	0.609333	6.33743e-277		Ccm2	0.642077	1.23819e-54		Kpna1	1.32399	1.1887e-13		Nfkbid	0.982664	3.11041e-98
Mir142hg	0.465733	0		Myom1	0.488287	1.91198e-276		Gcnt2	1.17078	1.45421e-54		Phf6	1.00602	1.19406e-13		Ell2	0.918542	5.89944e-98
Pld4	0.4585	0		Cux1	1.07156	9.80659e-276		Cd48	0.340026	2.71458e-54		Glcci1	1.52564	1.23099e-13		Tbc1d23	1.22909	9.70495e-98
Sirpb1c	0.43056	0		Pde7b	1.28219	1.75023e-275		Tacc1	0.654975	3.94426e-54		Ppm1h	0.997116	1.28543e-13		Lnpep	1.03218	2.07494e-97
AB124611	0.416896	0		Tlr2	0.700468	3.58417e-275		Chp1	0.76938	4.74965e-54		Pik3r1	1.15942	1.29529e-13		Pygl	1.08238	6.32509e-97
Pilra	0.394147	0		Pde3b	0.888178	1.16421e-274		Btk	0.344246	1.06258e-53		Ifngr1	1.35218	1.3692e-13		Slc3a2	1.01557	1.7293e-96
Hk3	0.386348	0		Elmo1	0.885881	5.09484e-274		Vps37b	1.20742	1.10226e-53		Sik2	0.871113	1.56695e-13		Rgcc	1.2106	1.98067e-96
Pik3ap1	0.383016	0		Grk3	0.456256	9.11307e-274		Ubald2	0.778225	2.19638e-53		Aebp2	1.30895	1.62718e-13		Plk3	0.927822	2.4433e-96
Ccr1	0.339702	0		Cflar	1.04458	1.06553e-273		Dgat1	0.612456	2.3655e-53		Cd37	0.489283	2.73558e-13		Csf1	1.81025	3.58316e-96
Gla	0.628174	1.15203e-303		Dusp5	0.895479	8.06741e-272		Dok1	0.256094	5.07509e-53		Gabbr1	0.443149	2.90625e-13		St3gal6	0.926185	5.56729e-96
Smpdl3a	0.773704	1.24105e-303		Camk1	0.577239	3.52592e-271		Gabarapl1	0.799356	5.09797e-53		Cd52	0.96008	3.1048e-13		Vav3	0.907298	3.12888e-95
Arpc1b	0.762386	2.51755e-303		Bri3	0.906687	4.45217e-270		Ptcd2	0.391882	5.78078e-53		Ip6k1	0.894493	3.61129e-13		E330009J07Rik	1.10569	1.61337e-93
Ms4a6b	0.499895	8.83984e-303		Atp13a2	0.563805	1.08537e-269		Mmd	0.884959	6.84912e-53		Ubald2	1.10699	4.2934e-13		Mctp1	0.61911	7.14584e-93
Trf	0.922577	3.09485e-302		Dram2	0.746821	5.74591e-269		Edem1	0.736276	3.50003e-52		Fam222b	1.19391	4.43934e-13		Mthfs	1.17851	6.1035e-92
Lmbrd1	0.925437	8.08321e-300		Slc6a6	0.883717	7.49843e-269		Cenpl	0.305698	3.97654e-52		Irak2	0.763818	5.28282e-13		Tax1bp1	0.734546	8.97263e-92
Mtpn	0.888862	3.11134e-299		Atp6v1a	1.06542	1.53225e-268		Stxbp6	1.50566	4.66715e-52		Birc6	0.89938	5.79647e-13		Ralgapa1	1.62817	2.77123e-91
Galc	0.585457	1.33084e-298		H2-K1	0.933863	1.83773e-268		Atox1	0.907738	5.30741e-52		Prkacb	1.38998	6.14907e-13		Chp1	1.21508	2.08262e-90
Rcbtb2	0.663202	4.62577e-297		Nrp1	0.941641	2.15901e-268		Alox5ap	0.64014	5.90181e-52		Dnajb6	1.08754	6.50021e-13		Lpin2	1.10662	3.7685e-89
Cdk14	0.925611	1.29671e-294		Arhgap26	1.19177	4.66429e-268		Sestd1	0.949811	9.50107e-52		Mta3	1.10877	7.11645e-13		Mtmr6	1.09368	3.733e-88
Ehd1	0.796493	4.23654e-294		Rab20	0.591884	5.23835e-268		Plac8	1.48663	1.52568e-51		Cmah	0.743455	7.39777e-13		Synj1	1.05222	9.71789e-88
Ednrb	0.850107	1.02408e-293		Cln8	0.597173	1.89964e-267		Ifngr1	1.22644	1.83215e-51		Areg	2.21734	8.28351e-13		Ddx5	0.571483	4.12776e-84
Cxcl16	0.882707	1.22092e-293		Zeb2os	0.279357	2.42365e-267		Neurl3	0.455616	2.4941e-51		Fosl2	1.30217	9.09392e-13		Cflar	0.944008	5.54127e-83
Hpcal1	0.799769	9.05216e-293		Snx5	1.06197	1.35364e-265		Snap23	0.718641	4.53927e-51		Lin54	1.68545	9.8969e-13		Cnnm2	1.07216	6.31162e-83
Dse	0.738948	9.41436e-293		Adora2b	0.77334	2.99977e-265		Gpbp1	0.716673	5.20974e-51		Nr4a2	1.15999	1.13032e-12		Trim30d	1.0879	3.71826e-81
Mmp14	0.857813	8.21878e-289		Cd200r1	0.40451	4.17629e-265		Chd7	0.888599	7.23992e-51		Fbxo34	1.38091	1.22247e-12		Sbno1	0.98374	5.48061e-81
Gpnmb	1.63075	1.02947e-288		Dhrs3	0.93058	5.84824e-265		Rnaset2a	0.606238	7.35157e-51		Fam49b	1.1081	1.27473e-12		Iqgap1	0.548993	8.28812e-80
Ly86	0.564223	1.35992e-288		Il10	1.29778	1.39534e-264		Fcho2	0.869716	1.80302e-50		Pacs1	1.16216	1.34235e-12		Gng5	0.692116	1.79538e-79
Lasp1	0.690681	5.18048e-288		AI504432	0.481252	6.73266e-264		Olfm1	0.426717	2.51095e-50		Auh	0.865283	1.63795e-12		Gcnt2	1.05164	2.28027e-79
Rab20	0.568889	7.79464e-284		Arpc1b	0.89017	1.23471e-263		Arl4c	0.709082	2.94682e-50		Nabp1	1.2241	2.01124e-12		Tnfaip2	1.1654	1.32458e-78
Slc27a1	0.574011	1.71954e-282		Iqgap1	0.899016	1.51118e-263		Arpc3	0.605261	3.81273e-50		Slc45a4	0.550207	2.04061e-12		Rhoa	0.667944	2.39387e-78
Mafg	0.812706	6.9144e-282		Akr1a1	0.967318	2.45642e-263		Fem1c	0.941564	4.36271e-50		Lrba	1.27849	2.09011e-12		Gpsm3	0.769478	2.56037e-78
Cyp4v3	0.484186	8.71399e-282		Hk3	0.415517	2.60942e-263		Eipr1	0.539767	5.13371e-50		Aim2	0.921923	2.25569e-12		Ube2b	0.771013	2.92378e-78
App	0.689677	1.83392e-279		Clta	0.906076	1.46227e-262		Purg	0.528993	6.06772e-50		Rfx3	0.881481	3.84742e-12		Msn	0.76115	7.52895e-78
Csf2ra	0.461105	5.80296e-278		Rap1a	1.03538	4.75727e-262		Atg16l2	0.368204	1.36838e-49		Tacc1	0.765842	4.22799e-12		Braf	1.23846	7.74458e-78
Epsti1	0.55777	3.93033e-277		Gngt2	0.732367	5.25035e-262		Flrt3	1.09391	1.48422e-49		Oga	0.982699	5.62773e-12		Laptm5	0.438706	6.11222e-77
Etv6	0.958702	3.78344e-275		Blnk	1.02805	7.11574e-262		Mapkapk3	0.85282	2.395e-49		Prrc2b	0.886217	5.917e-12		Rabgef1	0.950189	3.82878e-76
Pitpna	0.696997	9.47387e-275		Tmem104	0.430222	1.11848e-261		Trpv2	0.260419	3.95188e-49		Rock1	0.895491	6.55881e-12		Tgoln1	1.00289	6.43828e-75
Pgk1	0.862177	1.00706e-273		Dazap2	0.843573	6.8728e-261		Plcg2	0.547393	4.30675e-49		Prdm2	0.968344	7.72866e-12		Rlf	0.905776	6.90961e-75
Slc8a1	1.09396	1.02809e-273		Mafb	1.46614	6.96517e-261		Slc29a3	0.405654	9.46167e-49		H2-Q4	0.718187	7.82151e-12		Pnpla7	1.12928	9.13844e-75
Cltc	0.694291	1.10268e-273		Selplg	0.333241	1.36352e-259		Tank	0.976912	1.1048e-48		Diaph1	0.711514	8.45369e-12		Junb	0.668025	1.66479e-74
Cgnl1	0.729133	2.35033e-273		Tgm2	0.792863	4.2011e-259		Chd2	0.791819	3.02321e-48		Ncapd3	0.644908	9.20825e-12		Sntb2	0.96054	1.86271e-74
Uhrf2	1.13628	2.74589e-271		Fcgrt	1.10218	4.89288e-259		Elmo1	0.812766	3.62384e-48		Rai1	0.999221	9.98682e-12		Rybp	1.2626	3.29159e-74
Vim	0.833763	2.5794e-270		Lmo2	0.401596	6.20154e-259		Abi3	0.358435	4.3341e-48		Arih1	0.74242	1.06771e-11		Atp11b	1.24848	1.64096e-73
Ccl3	1.01539	7.73387e-268		Eps8	1.29423	1.61519e-258		Vasp	0.57867	4.47487e-48		Lbh	0.472203	1.77006e-11		Slc43a2	1.13481	3.67052e-73
Ppp4r2	0.77632	9.19207e-268		Oas2	0.360203	7.97538e-258		Snd1	0.844913	6.20528e-48		Pspc1	0.841625	1.81703e-11		Rnf11	0.959628	7.59742e-73
Ier3	1.26919	8.71032e-267		Entpd1	0.579598	7.52215e-257		Cd47	0.853447	1.1195e-47		Cdip1	0.845115	2.18491e-11		Cdk2ap2	1.31284	1.24019e-72
Tmsb4x	0.639568	9.94034e-267		Anxa4	0.831912	1.13803e-256		Fxyd5	1.02335	1.28125e-47		Malt1	0.934801	2.52856e-11		Il18	0.898063	3.6218e-72
Csf2rb2	0.453494	4.5292e-264		Sh3kbp1	1.0896	2.03354e-256		Zfc3h1	0.950401	1.5757e-47		Nipbl	0.787858	2.86364e-11		Pxn	0.894108	4.63524e-72
Anxa3	0.672399	1.24943e-262		Rab43	0.745555	7.9687e-256		Kdm2b	1.10117	1.77904e-47		Eif4g3	0.763175	2.89357e-11		Cdk17	1.01536	1.2826e-71
Stap1	0.475981	1.55063e-262		Slfn8	0.55561	1.9402e-255		Cux1	1.01242	1.94959e-47		Ube2j1	1.09505	2.90022e-11		Hmgb2	1.00265	3.16564e-71
1700017B05Rik	0.613866	1.76134e-262		Cyfip1	0.944789	6.00208e-254		Pcyt1a	1.44666	2.01805e-47		Grk6	0.524273	3.541e-11		1700017B05Rik	1.00449	4.7896e-71
Arrb2	0.502924	4.24908e-261		Tlr5	0.324623	1.8662e-252		Cd53	0.523912	2.21352e-47		Exoc2	0.848422	3.70345e-11		Atp2b1	0.801331	5.5569e-71
Glul	0.877881	5.31491e-261		Pitpnc1	1.65664	2.70346e-252		H2-Q7	0.964316	2.57467e-47		Col27a1	0.790115	3.83027e-11		Taldo1	1.16074	1.24211e-70
Furin	0.79449	9.37367e-261		Ifngr2	0.790888	4.44306e-252		Cep170	0.577864	2.73967e-47		Klf12	1.1825	3.92774e-11		Ip6k1	0.997857	1.52644e-70
Elmo1	0.630832	3.70841e-258		Xylt2	0.453828	4.98351e-252		Fam107b	0.727455	3.99859e-47		Tiprl	0.824691	4.41e-11		Ninj1	0.798542	2.3204e-70
Slc25a37	0.647569	3.64547e-257		Fxyd5	0.954417	5.17326e-252		Specc1	1.22972	4.21768e-47		Zbtb20	1.03262	5.9415e-11		Rnasel	0.870089	3.40619e-70
Npc1	0.759044	5.67984e-257		Slc49a4	1.05069	7.38463e-252		Mreg	2.23248	6.89825e-47		AI662270	0.388999	6.04889e-11		Pitpna	0.828577	3.42373e-70
Ifi204	0.610829	7.72792e-257		Lrmda	1.07944	7.64799e-252		Zfp667	0.393543	7.51097e-47		Rpa1	0.623932	6.49973e-11		Actg1	0.556165	4.31084e-70
Gm46224	0.437852	3.29505e-255		Abhd12	0.776119	1.25794e-251		Cox17	0.636641	8.59646e-47		Gramd1b	0.75593	7.21178e-11		Tnrc18	1.05375	2.15909e-68
Pcyt1a	0.779406	1.14466e-254		Gnai2	0.853194	4.6634e-251		Gm6377	0.292215	1.1266e-46		Vps54	1.6637	7.54541e-11		Slc27a4	0.849397	3.8249e-68
Snx24	1.1847	8.50645e-254		Lgals3	1.15478	1.07351e-250		Gmip	0.395905	1.16274e-46		Prkd2	0.570548	7.56239e-11		Agtpbp1	1.09971	5.48503e-68
Gab1	1.00283	3.11727e-253		Gab1	1.32894	1.38061e-250		Ubxn2a	0.529293	1.24545e-46		Galnt1	1.03954	7.75451e-11		Tra2a	1.03846	5.7631e-68
Gsap	0.518098	1.65928e-252		Bend4	0.749033	1.54052e-250		Mtmr6	0.5523	3.33431e-46		Lnpep	0.632048	9.97652e-11		Fyb	1.15949	9.01418e-68
Arpc3	0.59851	1.50667e-251		Abr	1.02529	3.06637e-250		Vrk1	0.422093	4.8918e-46		Stk24	0.887844	1.32967e-10		Arih2	0.866224	9.3999e-68
Picalm	0.707469	1.92263e-251		Pkn1	0.438922	5.45037e-250		Clec2d	0.814724	1.3979e-45		Thada	1.10977	1.35047e-10		Map3k5	1.09789	4.75676e-67
Metrnl	0.767466	3.89556e-251		Hcst	0.295773	8.24335e-249		Pacs2	0.434368	1.5869e-45		Gls	0.836317	1.63567e-10		Kmt2e	0.706954	9.8395e-67
Adam17	0.804826	5.46729e-251		Sp110	0.380429	4.09627e-248		Ubxn4	0.746592	2.04592e-45		Pkn1	0.602662	1.65313e-10		Prkcb	1.24517	1.3732e-66
Rgs10	0.576885	2.78808e-249		Lacc1	0.655297	7.17523e-248		Fam110a	0.284318	2.7002e-45		Arid5a	0.645276	1.83006e-10		Ubb	0.601063	3.19199e-66
Tnfrsf9	0.889207	5.73472e-248		Wfdc17	1.72308	1.18446e-246		Anxa11	0.894028	2.70572e-45		Pitpnc1	0.878064	3.31865e-10		Samhd1	1.29431	1.05722e-65
Cerk	0.817162	1.74054e-247		Hpse	0.516062	1.43193e-246		Rrad	0.365411	3.28741e-45		Tnfrsf1b	0.58847	3.51038e-10		Mpp7	1.4989	1.98499e-65
Ell2	0.922063	6.11399e-247		Etv3	1.01498	5.78742e-246		Wasf2	0.670439	4.02344e-45		March3	1.22173	3.68002e-10		Clec4n	1.03702	2.80393e-65
Marcksl1	0.833431	9.45255e-245		Gpsm3	0.425066	1.8352e-245		Ube2e3	0.639133	6.28803e-45		Mpp7	1.77897	4.09243e-10		Syne1	1.70703	4.91155e-65
Ago3	0.95683	1.49145e-244		Gnaq	0.921364	2.8475e-245		Txnrd1	0.841385	8.25025e-45		S100a4	1.6485	4.30527e-10		Ptpre	0.96233	1.86081e-64
Arhgap15	0.575483	3.30663e-244		Arhgap9	0.251774	4.50571e-244		Nfkbib	0.534881	1.03277e-44		Gpr132	0.949953	4.56393e-10		Arpc1b	0.635654	6.77334e-64
Grina	0.641239	2.62666e-243		Lfng	0.342225	1.42656e-243		Lilr4b	0.828099	1.65395e-44		Arhgap21	1.30278	4.56736e-10		Zfp263	0.955889	7.35998e-64
Arhgdib	0.680067	2.78112e-243		Gpr35	0.603936	1.63338e-242		Ifitm2	1.24978	1.79293e-44		Ubl3	1.01408	4.64064e-10		Map3k14	0.768437	1.09677e-63
Ccr2	0.678526	4.00631e-243		Litaf	0.812582	8.09409e-242		R3hdm2	0.729521	3.52492e-44		Ubr2	0.83652	4.83382e-10		Arrdc3	1.01587	1.66374e-63
Raph1	0.926121	9.44245e-242		Bin2	0.302923	8.66132e-242		Ppm1m	0.25294	5.8408e-44		Plcg1	0.749352	6.13564e-10		Wbp1l	1.02696	2.93069e-63
Skap2	0.747958	1.23743e-241		Dmxl2	0.493722	2.40545e-241		Sdf2l1	0.424333	6.14202e-44		Esyt1	0.545294	6.75023e-10		Ezr	0.996207	3.20324e-63
Dleu2	1.00534	9.67973e-241		Uvrag	0.903558	2.84768e-241		Pfn1	0.692084	1.1693e-43		Cd82	0.774099	7.07775e-10		Rnf125	0.759481	6.41202e-63
Got1	0.760654	1.01995e-240		Ctsh	0.82891	4.46804e-241		Nfil3	0.646535	1.63952e-43		Trmt61b	1.6282	7.43572e-10		Txnrd1	1.09136	1.4619e-62
Birc3	0.739375	1.5497e-240		Antxr2	0.954436	4.13942e-240		Gna13	0.639425	2.75689e-43		Abr	1.58967	7.49589e-10		Slc12a6	1.09615	2.03058e-62
Akt3	0.704064	1.06478e-239		Rhog	0.683939	1.39161e-239		Rnf8	0.523319	2.97589e-43		Ccm2	0.891872	8.47687e-10		Sgpl1	0.773638	3.22821e-62
Arhgdia	0.653929	1.2987e-239		Pcyt1a	0.871885	3.84178e-239		Ccdc167	0.357164	3.42413e-43		Cd53	0.428375	9.6604e-10		Gadd45b	1.51755	4.36658e-62
Slc38a1	0.548132	1.58337e-238		AI839979	0.40177	1.77232e-238		Ptpn18	0.302846	4.46445e-43		Trp53inp1	0.855306	1.05234e-09		Gpr35	0.80095	1.44545e-61
Prdx1	1.38343	2.94306e-238		Cst3	0.800648	1.93764e-238		D8Ertd738e	0.586226	7.04191e-43		Coro1a	0.634937	1.10547e-09		Runx2	1.00994	2.38786e-61
Cstb	0.707191	2.94803e-236		Mertk	0.523408	1.43581e-237		Rac2	0.389668	7.62955e-43		Epb41	1.29837	1.21267e-09		Gpbp1	0.785523	3.19558e-61
Cln8	0.55709	1.74134e-235		M6pr	0.724389	3.10154e-236		Acot7	0.346823	8.69449e-43		Cdc14a	0.495656	1.524e-09		Skap2	0.94522	3.2449e-61
Plaur	0.490325	1.59105e-233		Dusp2	0.576708	3.76442e-236		H2-T23	0.467552	1.15372e-42		St6gal1	0.720673	1.59063e-09		Dedd2	0.901125	1.33844e-60
St6galnac4	0.532452	3.26417e-232		Cdc42	0.736441	1.17863e-235		AA467197	0.738819	1.98919e-42		Usp38	0.957011	1.69216e-09		Cdkn1a	0.815518	8.69725e-60
Plcb1	0.817832	3.31846e-231		Jdp2	0.898107	1.35655e-235		Ube2j2	0.586519	2.62441e-42		Nrf1	0.929475	1.77855e-09		Rab32	0.777732	3.52951e-59
Rhoa	0.570354	6.89135e-231		Txnrd1	1.06183	1.49317e-235		Cdkn1b	0.556266	2.91715e-42		Dyrk1a	0.813647	2.02994e-09		Hnrnph2	0.887838	4.77759e-59
Gpalpp1	0.726497	7.4692e-231		Cacna1d	0.881408	1.82355e-235		Picalm	0.871832	2.92726e-42		Rbl2	0.92369	2.16572e-09		Atp6v1e1	0.9585	1.20749e-58
Nfkbie	0.520409	1.19057e-230		Eif4e	1.30323	2.59558e-235		Plcl2	0.899449	4.09102e-42		Slc9a9	1.22702	2.18389e-09		Zfyve26	0.840135	3.82454e-58
Cers2	0.540333	1.23941e-230		Irf2bp2	0.922001	1.49152e-234		Birc3	0.860102	4.3079e-42		Sh2b1	0.37819	2.3153e-09		Tm6sf1	0.818001	5.62261e-58
2510009E07Rik	0.786142	3.0423e-230		Tent5c	0.396508	1.56861e-234		Btbd9	0.779028	5.5361e-42		Brd4	0.554616	2.40105e-09		Trps1	0.727707	6.62835e-58
Kctd12	0.829972	4.06245e-230		Slc8b1	0.611609	2.10175e-234		Arl5a	0.969157	5.64333e-42		Sntb1	1.58343	2.40433e-09		Abr	0.571959	7.38497e-58
Uap1l1	0.453796	5.52414e-230		Rp2	0.500529	2.18496e-234		Rbbp8	0.939111	5.9057e-42		Zfp53	0.98417	2.43049e-09		Klf6	0.682769	4.01064e-57
Mafb	1.06302	6.26763e-230		Rnf157	0.670593	6.1574e-234		Slc35f6	0.352233	6.05776e-42		Gnas	0.956186	2.58417e-09		Ap3s1	0.931067	5.66511e-57
Arpc5	0.680582	9.88765e-230		Cep170	0.678997	1.28202e-233		Cd300a	0.665154	6.376e-42		Cwc25	1.24367	3.05439e-09		Zyx	0.88829	6.34048e-57
Slc48a1	0.761522	3.84992e-228		Dnajb14	0.642708	1.66409e-232		Pim1	0.61146	9.96985e-42		Ppm1b	0.818664	3.06813e-09		Plgrkt	1.0871	8.88312e-57
Zfand3	0.686171	2.77298e-227		Lrrc8d	0.868982	5.19839e-232		Nav1	1.09369	1.33901e-41		Rfx7	0.996474	3.30175e-09		Ago2	0.81298	9.83295e-57
Arhgap30	0.370892	1.67847e-225		Snx20	0.290183	2.57842e-230		Trps1	0.920594	1.47004e-41		Sfpq	0.592748	3.30307e-09		Msl2	0.988209	4.2133e-56
Slc49a4	0.837946	5.71179e-225		Neurl3	0.449022	1.0477e-229		Arap2	1.4923	1.55863e-41		Cntrl	0.6325	3.4946e-09		Clk1	0.632735	7.10688e-56
Rapgef1	0.827218	1.43879e-224		Mfsd12	0.413494	1.62485e-229		N4bp2l1	0.469817	2.45488e-41		Atf7ip	1.15867	3.90819e-09		Tfeb	0.830506	7.96616e-56
Rreb1	0.961553	2.18446e-224		Fli1	0.584275	3.75978e-229		Crybg1	0.60187	2.71699e-41		Cnot4	0.654373	4.05397e-09		Tet2	0.934285	1.21132e-55
Slc12a6	0.747623	6.243e-224		Fndc3a	0.921384	4.73845e-228		Dennd3	0.41023	2.73111e-41		Usp3	0.849239	4.16722e-09		Usp32	0.935959	7.45989e-55
Ecm1	0.681107	3.7708e-223		Stat4	0.252054	4.35347e-227		Lncpint	0.787264	3.36432e-41		Irf2	0.768954	4.28268e-09		N4bp2	0.922046	8.28589e-55
Sfmbt1	0.920428	1.92959e-220		Rap1b	0.804903	5.49383e-227		Phf12	0.520651	3.48408e-41		Ddx5	0.586278	5.47786e-09		Tsc22d3	1.0551	1.56258e-54
Gnptab	0.830656	1.98218e-219		March1	0.305325	7.12367e-227		Nfkb2	0.537003	3.81688e-41		Mmd	1.09491	5.75009e-09		Abtb2	0.938778	4.43751e-54
Galns	0.443471	6.44853e-219		Auh	0.695001	7.87884e-227		Tnfrsf11a	0.823052	4.04333e-41		Arid1b	0.759072	6.57561e-09		Arrdc4	0.957066	5.06455e-54
[truncated: 927 more rows]

## Sheet: FIBROBLAST
Supplementary file 2c: Differential expression table of genes for fibroblasts
[truncated: 1,320 more rows]

[truncated: 2 more sheets: ENDOTHELIAL, MISC.]
