# Supplementary material for: Decoding the complexity of delayed wound healing following Enterococcus faecalis infection
Source: eLife. 2024 May 20;13:RP95113. doi: 10.7554/eLife.95113 (PMC11105157; doi:10.7554/eLife.95113)
Supplement: Supplementary file 4. — Related to Figure 1C. [file elife-95113-supp4.xlsx]

## Sheet: EPITHELIAL
Supplementary file 4a: Differential expression table of genes for infected epithelial cells
Related to Figure 1C
Wilcoxon rank sum test in the infected dataset
BAS1				BAS2				BAS3				SUP1				SUP2				SUP3				SUP4				HFSUP1				HFSUP2				SG				OB
Gene	avg_log2FC	p_val_adj		Gene	avg_log2FC	p_val_adj		Gene	avg_log2FC	p_val_adj		Gene	avg_log2FC	p_val_adj		Gene	avg_log2FC	p_val_adj		Gene	avg_log2FC	p_val_adj		Gene	avg_log2FC	p_val_adj		Gene	avg_log2FC	p_val_adj		Gene	avg_log2FC	p_val_adj		Gene	avg_log2FC	p_val_adj		Gene	avg_log2FC	p_val_adj
Krt5	2.57974	0		Tmem163	1.9256	0		Tmem163	1.30868	2.49411e-26		Krt10	2.79019	0		Gm42418	1.22309	8.00882e-158		Dennd2c	1.89997	5.37922e-235		Crct1	4.52401	0		Krt6b	3.30181	0		Krt79	4.38583	4.02744e-281		Gm42418	1.37148	5.1686e-163		Ptn	1.64412	6.09615e-267
Fcgbp	2.45437	0		Mmp1b	1.37575	6.47556e-238		Nfasc	0.910663	2.47624e-23		Krt1	2.48477	0		mt-Co3	0.680601	2.2941e-111		Efna5	2.21097	3.87019e-234		Flg2	3.9325	0		Krt6a	3.03821	0		Sox9	1.63204	7.52294e-267		Camk1d	1.39102	1.80647e-90		Lgr5	1.30344	6.47742e-243
Col17a1	2.22016	0		Hmga2	2.41903	8.09231e-106		Cadm4	0.787448	2.35463e-22		Krtdap	2.0365	0		mt-Cytb	0.688897	1.71331e-95		Cdcp1	1.6121	4.93572e-214		Flg	3.83902	0		Krt16	2.70274	0		Alox12e	1.87534	1.71477e-259		AY036118	1.37384	1.78512e-84		Adgrl3	2.08941	9.32024e-229
Sox6	2.00937	0		Slit1	1.07666	1.44836e-97		Gfra1	1.4796	5.82433e-18		Dsg1a	1.91033	0		mt-Nd2	0.789263	1.48312e-80		Cdh1	1.78655	1.00339e-211		2310046K23Rik	3.81421	0		Fabp5	2.49589	0		Adgrl3	2.14422	8.21427e-253		Cstdc5	0.714655	1.44307e-62		Sox9	1.6013	4.90235e-206
Itga6	1.8074	0		Il24	1.30762	4.57241e-92		Samd12	2.20257	2.98326e-10		Lgals7	1.88581	0		mt-Co2	0.5878	3.09929e-77		Gm15987	1.88534	9.32486e-195		Lce1a1	3.80039	0		Cstdc5	2.35551	0		Defb6	3.90359	9.78493e-253		Krt14	0.59923	8.66838e-61		Tenm2	1.90446	1.8125e-187
Krt14	1.8058	0		Samd12	2.83047	3.39923e-91		Mpz	1.84795	6.34176e-10		Calm4	1.8459	0		mt-Atp6	0.559213	3.7288e-77		Herc4	1.9773	1.44459e-192		Asprv1	3.77064	0		Krt14	2.06727	0		Atp6v1c2	1.02698	2.06175e-224		Lgals7	0.499379	1.76459e-43		Sostdc1	0.770987	1.19807e-153
Gnai1	1.55976	0		Gramd2	0.720445	3.87311e-86		9530059O14Rik	1.36377	2.67361e-09		Mt4	1.80693	0		mt-Nd4	0.693763	1.92096e-74		Epha4	1.90001	2.17262e-191		Hrnr	3.73502	0		Sprr2d	2.78914	3.20767e-272		Skint2	0.491549	3.20987e-216		Fabp5	0.595921	1.16127e-40		Cxadr	1.66903	8.90568e-144
Cdcp1	1.35861	0		Pthlh	1.15647	2.79649e-81		Pcdh9	0.758782	5.85527e-08		Perp	1.78413	0		mt-Nd1	0.698382	1.32344e-69		Map2k4	1.94214	5.43119e-190		Klk7	3.39694	0		Dsc2	1.25985	3.69967e-264		Skint3	2.05039	1.44507e-207		Cmss1	0.862482	6.88755e-40		Robo2	2.08573	5.48269e-141
Lama3	1.21711	0		G930009F23Rik	0.739976	8.53843e-81		Slit1	0.882409	3.16699e-07		Dmkn	1.70263	0		AY036118	1.25288	3.48365e-69		Tenm4	1.4666	1.5128e-183		Cnfn	3.3858	0		Stfa1	2.69114	8.67092e-245		Epcam	1.84872	1.04159e-189		Krt16	0.598339	5.17939e-34		Nfib	2.08527	4.08951e-138
Itgb4	1.21016	0		Kcnk1	0.557242	2.61889e-78		Tmem117	0.597843	4.08742e-07		Fam25c	1.69762	0		Camk1d	1.29651	3.56483e-65		Fam135a	1.93087	1.12989e-182		Spink5	3.10597	0		Gsta4	1.46753	1.83082e-237		Gata6	0.781048	2.36058e-187		Hba-a1	5.55677	8.60589e-31		Pawr	1.75091	1.85388e-137
Wnt4	1.00432	0		Tmem117	0.890521	7.30745e-72		Nat8l	1.21793	7.66787e-07		Sbsn	1.6692	0		Cmss1	0.867979	3.40363e-64		Ssbp2	1.92914	1.98051e-181		Cdsn	3.07372	0		Lgals7	1.24979	8.69361e-233		Nebl	1.91029	1.89808e-185		Hba-a2	5.4269	4.55094e-30		Fst	1.66986	2.65749e-131
Tns4	0.896603	0		Ces2f	0.503749	3.22647e-66		Csta3	1.70034	1.71937e-06		Anxa8	1.61408	0		Krt14	0.39677	7.37728e-62		Ptpn13	1.52368	2.48485e-173		2310050C09Rik	2.85271	0		Sprr1b	2.30036	1.39489e-231		Sult5a1	1.57975	4.34445e-181		Krt1	0.355019	3.74593e-26		Bcl11a	1.07618	7.09061e-131
Col7a1	0.793919	0		Lama3	3.76908	9.5332e-65		Gsta4	1.46544	4.50374e-05		Dsp	1.57454	0		Cstdc5	0.4697	2.92457e-57		Npepps	1.50192	2.86999e-168		Gm94	2.85254	0		Gjb6	1.1302	9.49666e-229		Aadac	0.830663	9.88469e-171		Hbb-bs	5.70572	5.04985e-19		Adgra3	1.22487	6.43127e-124
Itga3	0.730017	0		Slc25a21	0.889094	1.53821e-60		Nkain2	1.27038	0.000147651		Trim29	1.53598	0		Krt1	0.337509	1.29098e-50		Ifi202b	2.11562	8.10965e-166		Lce1f	2.7871	0		Sprr2h	1.36842	1.11585e-228		Pkib	1.51131	5.4257e-160		Krt6a	0.57711	2.52329e-16		Sh3rf1	1.8232	8.65605e-122
Gna14	0.684322	0		Itgb4	3.03436	1.6277e-59		Mrc2	1.1436	0.000150253		Serpinb5	1.52995	0		Fabp5	0.355034	7.83566e-47		Mindy3	1.68492	4.335e-165		Cysrt1	2.76333	0		Gjb2	2.55027	2.19165e-217		Foxc1	0.653372	4.71226e-155		Gphn	0.596737	1.88633e-15		Hmcn1	1.47823	1.26868e-120
Fat2	0.615065	0		Lamb3	3.44441	2.23252e-58		Pcsk5	1.49724	0.000208234		Jup	1.50828	0		Krt16	0.372651	3.56936e-39		Klf5	1.31507	6.63741e-161		Hal	2.38836	0		Krtdap	1.16	6.53974e-215		Aldh3a1	0.610446	1.85426e-151		Krt6b	0.53463	2.48558e-14		Cadm1	1.73045	2.82569e-119
Scin	0.602735	0		Col7a1	1.97009	8.77374e-57		Ctnna3	1.12196	0.000609045		Skint6	1.44631	0		Gphn	0.622005	5.6957e-34		Sox6	1.76097	7.30849e-160		Nccrp1	2.35883	0		Ly6d	1.68709	4.06706e-213		Scel	1.58562	1.01994e-150		Lars2	0.591395	3.81763e-14		Moxd1	1.08685	2.28302e-113
Plek2	0.595036	0		Pitpnm3	0.889263	2.17523e-54		Col14a1	0.914062	0.00148961		Skint9	1.35149	0		mt-Nd3	0.948524	8.1045e-28		Irf6	1.47689	6.46012e-158		Krt23	2.26127	0		Krt17	2.2743	9.3991e-203		Cst6	4.32906	1.04641e-149		Chmp2a	0.272325	4.56717e-12		Rnf217	1.60074	1.48447e-111
Il20ra	0.584462	0		Lamc2	4.5163	1.05286e-52		Kdelr2	1.43219	0.00161208		Abca12	1.34665	0		Krt6a	0.371147	6.3161e-24		2610035D17Rik	1.48333	1.98309e-155		Serpinb7	2.21031	0		Perp	1.35549	1.28018e-194		Casz1	1.58531	1.67628e-148		Slc25a5	0.292839	6.43607e-09		Ctnnal1	0.985279	6.18494e-111
Wnt3	0.50179	0		Fermt1	1.34631	1.64664e-50		Grip1	2.40492	0.00174763		Rab25	1.34531	0		Lars2	0.654067	4.80397e-22		Grip1	1.6535	1.26382e-153		Orm1	2.17973	0		Dmkn	1.17112	3.95177e-181		Skint4	0.93477	3.92767e-148		Mkrn1	0.356254	1.22462e-07		Samd5	0.633502	9.18965e-111
Dsg2	0.489159	0		Gjb6	1.68361	5.15523e-49		Fbn1	1.28504	0.00329861		Tmprss4	1.28759	0		Krt6b	0.352746	1.04643e-20		Ppp1r14c	1.4329	1.52191e-153		Klk5	2.14967	0		Csta3	1.28521	4.64788e-180		Nfe2l3	0.540146	9.75425e-140		Fars2	0.258998	2.48056e-06		Golim4	1.5636	5.31297e-110
Tnfrsf18	0.441841	0		Itga2	2.08824	1.14468e-47		Tenm2	1.14599	0.00753439		Skint11	1.26059	0		mt-Co1	0.304952	1.23825e-20		Pawr	1.2286	6.04916e-153		Kprp	2.14755	0		Csta1	2.72004	6.31179e-179		Ano9	0.747542	2.032e-138		Calm4	0.32041	1.29123e-05		Tfap2b	0.882279	1.65286e-107
Wnt10a	0.417672	0		Patj	1.03015	1.78593e-47		Gjb2	1.78833	0.00776148		Elovl4	1.24107	0		Pf4	0.28734	1.6902e-14		Cecr2	1.26064	8.94062e-153		Tmprss11f	2.12928	0		Sfn	1.3754	1.51093e-176		Shroom3	1.067	8.53269e-137		Krt5	0.612672	1.2999e-05		Ptprk	1.60127	1.21817e-103
Bnc1	0.3695	0		Car9	0.57355	1.37742e-46		Col27a1	0.82431	0.00867006		Tprg	1.21618	0		Rpl37a	0.281612	4.11239e-08		Map7	1.40556	1.5852e-151		Psapl1	2.11673	0		Stfa3	1.77948	1.10092e-159		Calml3	1.06383	5.04399e-134		Stfa3	0.536594	0.000117678		Tanc2	1.45299	1.61315e-103
Cadm1	1.21164	7.95909e-301		Grip1	3.63315	2.85789e-45		Sox11	0.748536	0.00964998		Gadl1	1.21295	0		Ggh	0.279633	2.54708e-07		Trp63	1.43106	1.86056e-148		Mboat2	2.11122	0		Dsp	1.29506	2.85099e-157		Pdzk1ip1	1.36717	1.10787e-133		Hmgcs1	0.306987	0.000344722		Efna5	1.57923	3.0627e-102
Cdh3	0.731938	1.895e-296		Mmp13	2.64687	7.04589e-45		Col1a1	1.76804	0.0104481		Skint5	1.08671	0		Sfn	0.274564	3.35461e-06		Dsc3	1.33928	2.21569e-147		Ivl	2.07403	0		Tmprss11g	0.828851	2.459e-144		Slc5a8	0.970195	1.82755e-132		Perp	0.337213	0.000660596		Arhgap44	1.21045	3.5776e-102
Moxd1	0.737492	7.63813e-296		Rapgef3	0.570288	1.86716e-44		Emilin1	1.12589	0.0106976		Oas1f	1.01682	0		Stfa3	0.314959	6.26841e-06		Cd2ap	1.54122	8.38989e-147		Lypd5	2.02917	0		Stfa2	0.858782	1.49051e-142		Lmo7	1.3829	1.00746e-129		Palld	0.360393	0.011914		Casz1	1.42028	6.2814e-102
Trp63	1.43425	3.10391e-295		Sorcs2	1.52731	2.99459e-41		Medag	1.09928	0.0108681		Gcat	0.924422	0		Gm2000	0.264341	1.97755e-05		Smg1	1.39503	9.48028e-145		Il1f5	1.99837	0		Gm42418	1.10114	3.84594e-133		Myo5b	0.840625	1.66847e-129		Cyp51	0.268807	0.033021		Sema3e	1.60155	1.15656e-101
Guca2a	0.450239	9.74636e-291		Gli2	0.85228	6.59297e-41		Sema3b	0.925458	0.012315		Them5	0.872212	0		H2-Aa	0.46173	0.000140457		Gnai1	1.35658	1.52197e-144		Dnase1l3	1.89195	0		Krt1	1.20886	1.93922e-121		Igsf9	0.512606	1.06607e-127		Gm19951	0.908166	0.287815		Itga6	1.20571	4.4843e-101
Mmp28	0.48617	1.78975e-290		Aff3	1.63059	1.49216e-40		Sulf1	0.89663	0.0132099		Bbox1	0.868511	0		Atp5mpl	0.289719	0.000197935		Cxadr	1.33865	1.12611e-142		Slc5a8	1.80406	0		Calm4	0.920559	1.45024e-116		Klk7	1.68326	4.2886e-126		Stfa1	0.419465	0.48598		Vdr	1.315	1.80529e-100
Ackr4	0.371347	6.84442e-285		Moxd1	1.4368	2.35171e-40		Col3a1	1.51306	0.018543		Acer1	0.856262	0		Cd74	0.552373	0.000423707		Tjp2	1.57197	6.66216e-142		Slurp1	1.7823	0		S100a8	0.409759	2.16202e-115		Krt17	2.49385	1.06018e-122		Sfn	0.302178	1		Epcam	1.23233	1.20853e-99
Fam81a	0.353197	1.11295e-284		Itga3	1.44143	1.58246e-39		Rnf152	0.833189	0.0213468		Npl	0.835882	0		Gm19951	0.807785	0.000596341		Egfr	1.6145	1.3447e-140		Smpd3	1.76273	0		2610528A11Rik	1.33039	2.21989e-110		Susd2	1.0571	2.74851e-120		Ly6d	0.40016	1		Lgr4	1.61215	1.0524e-98
Tnfrsf19	0.82041	2.29619e-283		Bmpr1b	1.52809	1.79908e-37		Serpine1	1.30198	0.026317		Pla2g4f	0.754588	0		1810037I17Rik	0.301963	0.00192198		Myo1e	1.39736	4.25301e-140		Elmod1	1.75592	0		Rbp2	0.968518	7.68874e-103		Ly6g6c	1.85737	2.49433e-119		Zfhx3	0.699772	1		Plekha7	1.1259	2.58314e-98
Smoc2	0.788458	1.18763e-281		Phldb2	1.98043	2.02651e-37		Aebp1	1.39547	0.0265074		Clic3	0.740358	0		Rps26	0.258631	0.00264599		Gata3	1.24175	7.55121e-139		Nrtn	1.71469	0		Urah	1.50843	3.66577e-101		Mill1	1.23012	3.04049e-118		Fgfr2	0.746322	1		Etl4	1.27522	1.62865e-94
Lamc2	1.57404	2.89654e-281		9530059O14Rik	1.11897	3.9502e-37		Sox5	0.982853	0.0272618		Ankrd35	0.732247	0						Cadm1	1.47286	3.42714e-137		Calml3	1.67842	0		Teddm3	0.920247	2.42399e-97		Prickle2	1.15795	4.85735e-118		Auts2	0.505691	1		Col17a1	1.37722	7.95491e-94
Fermt1	0.456425	8.03852e-281		Csta3	1.49189	8.09068e-37		Sdk1	1.19619	0.0331149		4833423E24Rik	0.695712	0						Ctnnd1	1.36626	4.17244e-136		Clic3	1.66817	0		Il33	1.68702	2.13051e-95		Sprr1a	2.54221	3.99137e-117		Ccl4	0.521507	1		Grip1	1.49922	5.52724e-93
Ccl27a	1.67689	3.22949e-277		Rnf152	1.01348	8.39528e-37		Col1a2	1.49113	0.0375155		Aldh3b2	0.641961	0						Nr6a1	1.37574	1.28654e-135		Atp6v1c2	1.59912	0		AY036118	1.43509	5.14121e-89		Plet1	1.79516	5.72423e-116		Trim29	0.25419	1		Trp63	1.33477	5.58702e-90
Fgfr3	0.618	4.43346e-276		Dsg3	2.16541	1.69445e-35						Ace2	0.554047	0						Clec2g	0.93726	5.00046e-133		Eps8l1	1.53932	0		Sbsn	0.667997	8.49605e-82		Lratd1	0.841851	5.79471e-116						Tcf12	1.57336	4.58797e-87
Lamb3	1.13871	1.44216e-271		Col17a1	3.17077	5.0517e-35						Ly6g6e	0.507841	0						Map3k20	1.33354	9.59402e-133		Cldn4	1.53135	0		Lypd3	1.24572	1.63147e-80		Efnb2	1.2628	1.96385e-113						Ptpn13	1.35748	2.29491e-85
2610035D17Rik	1.40995	4.3538e-268		Tgfa	1.56906	1.41857e-33						Paqr5	0.490671	0						Ctnna1	1.27727	2.5161e-131		Dkkl1	1.45771	0		Jup	1.22694	1.8427e-80		Emp2	1.39062	2.75433e-111						Gpc4	1.18321	1.65396e-84
Dsg3	1.06242	7.36008e-262		Itga6	3.20441	1.49915e-33						Sdr16c5	0.811557	7.69716e-303						Sgms1	1.50525	1.24199e-129		Sdcbp2	1.40288	0		Dstn	1.07058	1.96996e-79		Acpp	1.41133	9.02592e-111						Pard3	1.15854	1.68141e-82
Phgdh	0.495859	8.38977e-259		Gm49890	0.959843	1.26379e-32						Capns2	0.882901	4.72276e-300						Ralgps2	1.13471	9.76539e-129		Slc15a1	1.38616	0		Defb1	0.956437	2.40098e-77		Epha4	1.38952	1.57919e-109						Syne2	1.2621	1.64249e-81
Jag2	0.576877	7.05349e-257		Nckap5	2.17459	1.56406e-32						Dsc3	1.50952	3.90925e-299						Epb41l5	0.903049	3.14485e-127		Klk9	1.35189	0		Pkp1	1.1299	5.94405e-77		Rassf9	0.82338	1.12555e-107						Stox2	1.15549	5.11191e-81
Chdh	0.331236	1.5538e-254		Fhl2	1.18044	4.18243e-32						Clca3a2	2.0234	2.05685e-296						Nckap1	1.13027	2.50176e-126		Trex2	1.33815	0		Spink5	1.4295	1.77984e-76		Cldn1	1.26821	1.73082e-106						Crim1	1.12546	1.29503e-79
Ssbp2	1.76209	5.08983e-253		Nat8l	1.17299	7.47918e-32						Pof1b	1.27077	6.53673e-296						Abca12	1.63395	3.69556e-126		Alox12b	1.32339	0		Krt10	0.504813	2.32621e-76		Vdr	1.125	1.78434e-105						Ptprg	1.23614	1.81142e-79
Wee1	0.765301	1.75373e-247		Trp63	2.3482	1.03563e-31						Dapl1	1.20913	2.99746e-295						Pard3	1.22933	2.72058e-125		Acp7	1.31923	0		Aqp3	1.28869	3.88566e-73		Bbox1	0.816759	2.63389e-104						Aopep	1.32557	8.13641e-79
Sema5a	1.48598	3.11615e-245		Tenm2	1.51012	1.14099e-31						Pla2g2f	0.92587	9.47787e-295						Srpk2	1.28119	1.31786e-124		Sdr9c7	1.31309	0		Hspb1	0.809304	4.8921e-72		Cxadr	1.3339	3.45428e-104						Zbtb16	1.48876	2.45121e-78
P3h2	1.1245	4.37099e-242		Tll1	1.51135	1.39756e-31						Gata3	1.26552	1.09891e-293						Sh3d19	1.3332	2.7322e-123		Cpm	1.26388	0		Endou	0.859483	5.24126e-66		Pcsk6	0.623157	2.51491e-103						Map7	1.09597	3.45272e-77
Bcl11b	1.14531	1.65859e-240		Mmp9	3.15105	5.23769e-31						Sfn	1.59429	3.23709e-293						mt-Atp6	0.83507	3.75042e-123		Cpa4	1.24817	0		S100a16	1.09609	1.91733e-62		Skint1	0.805824	3.18065e-103						Arhgef4	0.920288	4.40624e-77
Slc24a3	1.41722	5.72924e-239		Glt1d1	1.07238	6.80931e-31						Klc3	0.89592	2.61927e-290						Baiap2l1	1.11054	4.99502e-123		Slc46a2	1.23629	0		Crabp2	0.745088	2.89459e-52		Bmp7	0.572243	2.12069e-102						Ppp1r14c	1.13746	1.19126e-76
Fxyd3	1.23675	3.40113e-236		Bcl2l15	0.731423	1.02036e-30						Pdzk1ip1	0.946604	7.39564e-288						Mast4	1.04382	4.67837e-122		Gsdma	1.22925	0		S100a14	0.988683	1.18054e-51		Cdh1	1.2969	1.30773e-101						Mir205hg	0.742682	3.05417e-75
Slc27a3	0.496934	8.30658e-236		Flrt2	2.17228	3.66418e-30						Sptlc3	1.04056	8.36462e-288						Dip2b	1.24797	4.50695e-121		Abhd12b	1.07757	0		Dsg3	0.953405	1.66917e-49		Endod1	0.723331	1.54981e-99						Cdh3	0.874139	2.7625e-74
Shmt1	0.313299	7.67063e-235		Fam167a	0.866339	5.62238e-30						Dsg1b	0.904656	1.01285e-286						Tspan5	1.48426	1.22544e-120		Anxa9	1.07519	0		Krt5	0.734373	7.62205e-49		Klc3	0.947271	5.45504e-99						Jag2	0.595062	2.90976e-74
Robo1	1.232	1.13585e-234		Slco2a1	1.87228	5.86066e-30						Lypd3	1.52392	1.09528e-285						Kif13b	1.58562	2.38032e-120		Calcb	1.00582	0		Dsc3	0.851057	8.99129e-48		Acot1	0.42411	3.62561e-98						Rere	1.13647	6.00152e-74
Card10	0.335894	2.65193e-234		Col23a1	1.19145	4.91776e-29						Gltp	1.48207	5.9058e-285						Tiam1	1.2979	1.54857e-119		Aloxe3	0.952108	0		Fam162a	1.13159	1.12493e-47		Clip4	1.02487	6.30362e-98						Bnc2	1.45381	1.76307e-73
Dennd2c	1.22771	2.89582e-233		Enah	2.4508	6.09269e-29						Krt78	0.857299	1.79577e-283						Esrp1	1.10621	1.74342e-119		Cgn	0.895317	0		Rab25	0.791972	3.94823e-47		Eps8l1	0.629497	7.90389e-98						Acpp	1.05302	1.89516e-73
Gata3	1.1328	3.32496e-231		Gjb2	1.92894	8.83533e-29						Sptbn2	0.675081	6.69554e-282						Slco3a1	1.36839	2.03394e-119		Dnase1l2	0.864911	0		Dsg1b	0.828752	9.39776e-46		Plekha7	0.737842	8.92508e-98						Myo1d	1.33582	3.0954e-73
Celsr1	0.471505	4.33185e-229		Arntl2	0.751006	2.04667e-28						Clca2	0.80135	5.33865e-281						Dsg3	1.1847	1.78858e-118		Il1f6	0.84982	0		Tpm2	0.798568	9.16083e-45		Ocln	0.914811	1.68719e-97						Auts2	1.54375	3.94878e-73
Ppp1r14c	1.04721	7.28648e-222		Prelid2	0.779935	6.71321e-27						Ly6g6c	1.62411	1.92737e-278						Strn3	1.21484	4.22978e-118		Lipk	0.827639	0		Camk1d	1.18803	3.07492e-44		Tmem45a	1.39302	1.07267e-96						Sult5a1	1.51511	1.42936e-72
Ccdc3	0.597642	6.26022e-218		Mtss1	1.70065	2.68996e-26						Sult2b1	0.863497	3.38437e-274						Wwc1	1.01989	1.07699e-115		Slurp2	0.827216	0		Rps26	0.477932	1.76259e-42		Gstm5	0.872244	9.78666e-95						Lrig1	1.43217	3.11789e-72
Bcam	0.577818	1.11571e-215		E2f7	0.609446	7.88807e-26						Ly6d	1.48305	1.5321e-273						Maoa	1.42154	1.25592e-115		Wfdc5	0.740258	0		Elovl4	0.763832	8.41171e-42		Krt80	1.09978	7.22057e-92						Fermt1	0.493072	1.85578e-71
Epb41l4b	0.531905	1.84734e-214		Dkk3	0.916177	1.1815e-25						Gjb5	0.736316	8.843e-271						Sema3c	1.50926	1.82021e-114		Il1f8	0.685333	0		Cmss1	0.737155	5.17337e-40		Lgals7	1.47235	1.21195e-91						Kank1	1.27311	3.59227e-71
Cxadr	1.19855	2.1186e-214		Nrg1	2.43429	1.37776e-25						Sytl1	0.558449	2.81961e-269						Gtf2f2	1.2607	2.413e-114		Cldn23	0.59043	0		Sult2b1	0.614983	1.22583e-38		Plxdc2	1.45429	1.24801e-90						Kif21a	1.14331	6.08743e-71
Ctnnal1	0.71052	2.1301e-213		Tenm4	1.81693	1.38458e-25						Krt77	2.50462	3.4711e-268						Ehf	1.15469	4.6934e-114		Arhgap40	0.388881	0		Anxa1	0.914664	3.21126e-38		Ehf	1.10023	2.62287e-89						Cdh13	1.44411	6.37732e-70
Net1	0.831711	6.46318e-212		Ifitm10	0.551657	8.58332e-25						Tesc	0.697468	4.14764e-266						Lrrc1	1.23808	5.51466e-114		Lce1a2	3.53778	8.74667e-294		Sprr2a3	0.780292	6.46976e-38		Ly6d	1.38869	8.04069e-89						Tnk1	0.693967	2.33849e-69
Krt15	1.91937	7.28376e-212		Jag1	1.816	1.00419e-24						Pkp1	1.19558	5.84151e-266						Myo10	1.23087	9.6771e-114		Gprin2	0.546786	5.66843e-291		Fgfbp1	0.879512	4.61104e-37		Sdr16c6	0.838361	2.02543e-88						Btbd11	1.15763	7.61825e-69
Pard6g	0.815093	2.2218e-211		Vwa1	0.69765	1.06796e-24						Lipm	0.59368	1.11579e-265						Naa15	1.08453	2.48603e-113		Cobl	1.76608	9.32029e-291		Gsdmc	0.611374	5.12449e-37		Adgrl2	1.34556	3.01436e-88						Pde7a	0.949091	1.35609e-68
Grhl2	0.473937	1.37394e-210		Itgb1	2.07882	1.35249e-24						Scel	1.08379	3.49684e-262						Slc22a23	1.20205	8.702e-113		Lor	5.46568	2.31828e-290		Mpzl2	0.734107	1.15944e-34		Elovl7	1.00202	1.83178e-87						Afdn	1.32895	7.93292e-68
Map7	1.04582	2.33858e-210		Pmepa1	1.76623	1.43403e-24						Adgrf4	0.607635	9.46572e-257						mt-Nd1	0.810202	9.55296e-113		Krt78	1.43045	6.98217e-287		Dynll1	0.806378	1.60677e-33		Rgs20	1.06289	2.50296e-87						Nhsl1	1.17932	1.32092e-67
Lgr6	0.404348	8.86211e-209		Itgb6	1.00179	2.078e-24						Rhbg	0.318091	4.46504e-255						Syne2	1.21276	1.9147e-112		Faah	1.18013	1.13926e-286		Gltp	0.873795	3.19452e-33		Ovol1	0.832211	5.39828e-87						Cpne8	1.09085	2.22879e-67
Col4a5	0.451049	2.16818e-207		Aplp2	2.35259	7.50217e-24						Clip4	1.0054	3.69508e-253						Csnk1a1	0.945463	2.46339e-112		Fndc9	0.618628	6.31699e-282		Serpinb5	0.772369	6.48741e-32		Lrrc1	1.14791	2.3793e-86						Pkp4	1.15808	3.16207e-67
Celf4	0.376263	1.35329e-206		Cdh3	1.00481	1.47017e-23						Zfp750	0.637477	2.95919e-252						Bcl11b	1.04021	4.74745e-111		Slc6a14	1.61137	6.23585e-280		Blmh	1.0056	8.67285e-32		Celsr2	0.749227	3.30715e-86						Ptpn4	1.02046	9.06065e-67
Col4a6	0.455946	3.99429e-205		Palld	1.53469	1.59512e-23						Hal	0.737134	1.34184e-251						Ptpn3	1.01108	5.03427e-111		Pglyrp3	1.05407	9.47184e-275		Grip1	0.735435	9.30265e-32		Klk5	0.636454	4.7327e-86						Mical3	0.871456	1.31121e-66
Bcl2l15	0.31362	4.21954e-204		Map6	0.707304	2.82044e-23						Abhd6	0.716859	8.96026e-251						mt-Co3	0.735716	2.62437e-110		Pla2g2f	2.11068	6.01655e-272		Rplp1	0.335878	2.03966e-30		Klf4	1.23982	7.84831e-86						Krt15	2.17452	2.23667e-65
Wnt16	0.288252	4.41742e-203		Ltbp1	1.32593	3.89578e-23						Adgrf2	0.877364	3.38327e-248						Lypd6b	1.14095	3.33242e-110		Klk8	1.97975	1.29744e-266		Rps12	0.360648	6.63983e-30		Grhl3	0.569965	9.90505e-86						Cables1	0.574085	3.23332e-65
Sema3c	1.27077	1.57513e-202		Fam83a	0.545861	5.36518e-23						Endou	0.841107	6.15326e-248						Tacc2	1.12202	2.15075e-108		Tspan8	1.46068	7.94972e-265		Higd1a	0.940973	2.10141e-29		Ccl27a	1.76658	1.87916e-85						Prickle2	1.08868	5.63929e-65
Rps6ka1	0.37574	4.52485e-198		Slc2a1	1.54157	7.41403e-23						Casp14	0.464687	1.47371e-244						Nipal2	0.965317	1.36815e-107		Rps6ka6	0.891371	1.07283e-262		Sprr1a	0.821796	3.01852e-29		Rbp1	1.09817	9.35404e-85						Epb41l4b	0.853773	8.64219e-65
Grip1	1.18524	2.42158e-197		Fads3	0.661105	1.8318e-22						Alox12e	1.15026	2.10775e-244						Mctp2	1.09038	2.3478e-106		Flvcr2	0.679845	3.30408e-262		Ide	0.776118	4.3287e-29		Pof1b	1.0237	1.34379e-84						Fgfr2	1.2429	2.53258e-64
Trp53i11	0.298288	3.40912e-196		2610035D17Rik	1.96212	2.52976e-22						Evpl	0.882923	3.1504e-242						Tsc22d2	1.34876	9.28697e-105		Rnf225	0.803073	2.67621e-261		Trim29	0.801421	4.34602e-29		Faah	0.428069	6.73445e-84						Tenm4	1.23937	3.33879e-64
Ptpn13	1.15627	4.80385e-195		Porcn	0.544378	3.17409e-22						Tacstd2	1.2836	2.6862e-240						Nhsl1	1.36034	1.0189e-104		Krt80	2.03521	1.34995e-259		Actg1	0.321297	8.36795e-27		Atp6v0a4	0.559918	1.95633e-83						Cdh1	1.0647	7.51686e-64
Ajuba	0.314665	6.85178e-194		Ggct	1.86096	3.18428e-22						Ptgs1	1.06371	1.11213e-239						Tnik	1.21076	1.68014e-104		Klk6	1.5766	3.94418e-256		Tuba4a	0.831344	1.9818e-26		Pla2g2f	1.01824	4.81587e-83						Luzp1	1.20328	7.92827e-64
Efna5	1.30457	7.40356e-193		Stab1	1.10684	3.72319e-22						Zfp185	0.383794	4.37116e-238						Pdlim5	1.22786	8.94021e-104		Tgm1	1.17489	2.95729e-254		Krt77	0.367614	3.04555e-25		Wwc1	1.08989	7.60336e-83						Lama3	0.811206	9.26507e-64
Tfap2a	0.704804	9.26895e-193		Wnt5a	0.820506	4.06985e-22						Skint10	0.456526	4.06942e-237						Huwe1	1.1188	1.39711e-103		Rdh9	0.537125	1.03825e-253		Rbp1	0.632924	5.93988e-25		Dbi	1.63141	3.28107e-82						Magi1	1.00655	1.25347e-63
Clca3a2	1.50455	2.25075e-192		Plch2	0.822386	5.21244e-22						Orm1	0.620771	9.61985e-237						Ambra1	1.14305	1.88015e-103		Sbsn	3.36605	5.25006e-249		Nectin4	0.569527	6.10094e-25		Erbb3	0.708961	3.82709e-82						Mrtfa	1.06255	1.39342e-63
Car12	0.696053	5.62415e-192		Ptprf	1.30557	1.16309e-21						Cyp2b10	0.497704	1.89301e-236						Itprid2	1.16707	5.66811e-103		Slc28a3	0.925355	1.1362e-244		Egln3	0.816398	7.16643e-25		Adgra3	0.620771	5.60616e-82						Kcnh1	0.803515	1.40218e-63
Slco2a1	0.894216	2.16226e-190		Ednra	0.511585	1.41075e-21						Hs3st6	0.43632	4.67806e-236						Yap1	1.12568	5.71324e-102		Pof1b	2.1602	2.69689e-243		Fam25c	0.574087	2.44776e-24		Mal2	0.680474	1.66616e-81						Adgrg6	0.925692	8.66053e-63
Btbd11	0.732403	5.99398e-189		Nme7	0.526433	1.85028e-21						Gm9750	0.452051	5.53031e-236						Slmap	1.06388	6.36513e-101		Bpifc	1.3658	8.80317e-241		Tmprss4	0.648492	4.62103e-24		Ppl	0.838033	8.38347e-81						Ddr1	0.889382	1.12735e-61
P2ry1	0.267784	4.66855e-188		Cdcp1	1.45234	2.11556e-21						Dnase1l3	0.86528	7.26626e-236						mt-Nd4	0.737149	1.25255e-100		Epn3	0.839624	3.41015e-240		Ly6g6c	0.777068	8.41397e-24		Dapl1	1.56614	1.15064e-80						Cdcp1	1.00554	4.45713e-61
Shtn1	0.621693	1.593e-186		Sh2d5	0.533515	3.6682e-21						Cyp4f39	0.480204	3.93264e-235						Maml3	0.976267	8.84716e-100		Fam25c	2.80894	4.23138e-238		Gsto1	0.792422	1.40313e-23		Egr2	0.792458	1.42778e-80						Gmds	1.20213	5.24075e-61
Mapkbp1	0.565805	2.09401e-185		Herc3	0.945849	4.16772e-21						Homer2	0.687516	2.04947e-233						Mid2	1.03754	1.61404e-99		Hsbp1l1	0.49919	4.91176e-238		Enah	0.751812	8.57576e-23		Zbtb7c	0.660976	2.32377e-80						Atxn1	1.12456	7.77437e-61
Irf6	1.03618	2.76364e-185		Pi15	1.25915	5.60671e-21						Eppk1	1.06001	2.85464e-233						Mir100hg	1.27908	3.365e-99		Ppl	1.86029	4.41382e-231		Ggct	0.750595	4.04595e-22		Dsp	1.18383	6.15955e-80						Tle1	0.922074	1.36859e-60
Klf5	1.01795	4.17918e-185		Ces2g	0.640721	1.21459e-20						Grhl1	0.852971	3.67825e-233						Rab38	0.946391	5.33539e-99		Slc39a2	0.583863	9.09031e-226		Rpl41	0.314397	4.16726e-22		Efna3	0.500239	6.40112e-80						Galnt18	1.19044	2.49728e-60
Pkp4	1.07847	1.46535e-184		Pcdh7	1.95876	3.60869e-20						Apoc1	1.22469	2.08492e-232						Ubr5	1.19437	5.78251e-99		AA986860	1.21536	1.42614e-225		Lad1	0.492632	1.06167e-21		Kif13b	1.23017	8.77496e-80						mt-Atp6	0.669213	2.85079e-60
Wnt7b	0.280383	2.17978e-184		Arhgef4	1.24794	5.0893e-20						H60c	0.423889	3.71853e-232						Epb41l4a	0.820421	1.92305e-97		Calm4	2.94771	9.44809e-224		Pkp3	0.651444	7.43724e-21		Bicdl1	0.648382	4.56188e-79						Patj	0.540213	2.14415e-59
1700025G04Rik	1.01411	3.0814e-184		Dsc2	0.668692	5.1361e-20						Efna3	0.395726	1.46778e-230						Pkp4	1.28273	2.12147e-97		Arhgef37	1.19053	1.73856e-223		Gm94	0.404876	2.46009e-20		Grhl1	0.883475	8.98379e-79						Slc25a13	0.717735	2.33419e-59
S100a14	0.894236	1.44487e-181		Col18a1	1.75955	7.07798e-20						Ephx3	0.408291	9.55941e-230						Erc1	1.10777	4.89305e-97		Ly6g6c	2.55751	1.66149e-222		Cd24a	0.60307	1.55198e-19		2310046K23Rik	1.89696	4.77785e-77						Eda	1.26531	7.99256e-59
Pak6	0.33293	6.73227e-179		Trp53i11	0.599547	7.31207e-20						Esrp2	0.406116	1.16975e-229						mt-Nd2	0.759264	8.81449e-97		Krtdap	2.97332	4.30759e-222		Lars2	0.541105	2.66584e-19		Homer2	0.833128	1.56688e-76						Barx2	0.867814	6.49425e-58
Ckmt1	0.641143	2.27099e-176		Snai2	0.560196	1.79005e-19						Ephb6	0.476938	1.71203e-229						Pum2	1.11668	2.46913e-95		Tmem54	1.10884	7.03734e-221		Rps20	0.319386	8.99591e-19		Psapl1	1.08224	2.46548e-76						Gpc6	1.77668	6.69883e-58
Slc25a48	0.436236	1.33386e-175		Gnai1	1.39281	2.53998e-19						Urah	1.06168	1.78611e-229						Prkci	1.01559	4.12046e-95		Dmkn	2.64837	1.40066e-219		S100a11	0.31218	5.50667e-18		Myh14	0.562376	6.71166e-75						Klhl29	0.82724	4.13026e-57
Ahcyl2	0.975818	1.58453e-175		Atxn1	2.06687	2.65224e-19						Hpgds	0.85617	2.32796e-228						Col17a1	1.14064	1.05005e-94		Prss8	0.706072	1.85676e-218		Serinc2	0.493055	7.92848e-18		Tprg	0.899518	3.85475e-74						Myo1e	1.04068	5.80488e-57
Gm44613	0.619242	2.92112e-174		Il17re	0.420914	3.45963e-19						Gm15987	1.25117	4.65118e-228						Slc24a3	1.41194	1.12848e-94		Susd2	1.50844	8.73025e-218		Rab27b	0.517083	7.95194e-18		Skint9	1.02019	3.86317e-74						Egfr	0.951476	6.48344e-57
Wnk2	0.355397	4.35189e-174		Pgf	0.676078	6.02389e-19						Nectin4	0.657414	1.29483e-227						Il13ra1	1.04327	1.70464e-94		Gm11992	0.384501	2.17087e-217		Hbegf	0.686142	5.31551e-17		Cttnbp2	0.865057	5.80677e-74						Trabd2b	1.21009	3.86666e-56
Cpe	0.581032	4.67625e-174		Tgfbi	1.76417	7.35532e-19						Tmem45a	1.14672	4.29889e-227						mt-Co2	0.656791	1.79426e-94		Ano9	0.985873	4.26681e-216		Anxa8	0.652023	7.02473e-17		BC016579	0.51598	1.55742e-73						Yap1	1.04635	1.51371e-55
Plxnb1	0.263583	5.0122e-174		Efnb1	1.23562	7.4951e-19						Ggct	1.07612	8.02e-227						Ankrd11	0.968325	2.08383e-94		Spag1	0.458291	7.47057e-216		Ndufa4l2	0.621411	2.49249e-16		AA986860	0.6896	1.7078e-72						Tns4	0.802026	1.77747e-55
Dgka	0.67051	9.90454e-174		Frmd4b	1.68817	8.93155e-19						Gm94	0.976121	9.25565e-227						Tcerg1	0.975222	4.29474e-94		Atp1b1	0.886403	2.57759e-214		Fam57a	0.571024	8.25571e-16		Esrp1	0.923907	3.18731e-72						Rbfox2	1.0258	2.28757e-55
Dsc3	0.989691	2.03784e-173		Btbd11	1.36924	9.6294e-19						Gm16136	0.354831	1.12364e-226						Tfap2a	0.973113	4.5304e-94		Ccl20	1.17556	7.74037e-213		Dsg1a	0.618309	1.0062e-15		Sdr16c5	0.547342	7.19787e-72						Enox1	1.5172	4.44029e-55
Cib2	0.267437	2.10359e-173		Cstdc6	0.504567	2.88489e-18						Krt80	0.896917	2.09307e-226						Esyt2	1.21095	1.57569e-93		Smpd1	1.307	2.40395e-211		Itm2b	0.294145	1.10062e-15		Defb1	0.848094	1.21437e-71						mt-Co1	0.671957	4.98236e-55
Gm49890	0.809903	2.92248e-172		Tspan3	1.60475	4.20858e-18						Gjb3	0.528699	1.45245e-224						Phtf2	1.04753	2.4443e-93		Elovl1	2.16499	7.09012e-210		1810037I17Rik	0.769536	5.30488e-15		Perp	1.059	3.19929e-71						Macf1	1.17705	5.07011e-55
Edaradd	0.304541	4.19958e-172		Pxdc1	1.25773	5.10427e-18						Gjb4	0.495386	1.96257e-224						Aebp2	0.966662	4.69452e-93		Liph	0.620858	9.64906e-209		Rps10	0.313777	6.13941e-15		Sdc4	1.19319	4.05571e-71						Lmtk2	1.24722	3.95424e-54
Hmgn1	0.944106	4.8183e-172		Aknad1	0.364312	6.69727e-18						Chit1	0.902129	7.86495e-224						Pard6g	0.857499	6.10351e-93		Elovl4	1.94947	2.57716e-208		Rplp2	0.304838	1.36022e-14		Gm15987	1.09735	7.9703e-71						Fryl	0.936005	4.13673e-54
Lancl1	0.552917	5.20829e-172		Tmigd1	0.468029	8.52413e-18						Mgst2	0.458341	2.66723e-222						mt-Co1	0.762872	1.84866e-92		Rarres1	0.945713	2.10107e-206		Rpl13	0.257885	1.70261e-14		S100a14	1.07314	9.10605e-71						Grhl2	0.728676	1.09334e-53
Fzd6	0.426031	1.00902e-168		Cpe	1.32149	1.0317e-17						Slc6a20a	0.342388	3.36245e-222						Tle4	1.23062	2.86125e-92		Lipm	1.16148	4.65359e-206		Gja1	0.673639	2.12142e-14		Orm1	0.526587	3.56378e-70						Nedd4l	1.17553	1.71589e-53
Epb41l4a	0.650001	2.83283e-168		Krt5	1.83892	2.7134e-17						Psapl1	0.628488	9.01524e-222						P3h2	1.06115	2.98051e-92		Asah2	1.22939	5.83623e-206		Rps2	0.342024	4.65334e-14		Macc1	0.633396	5.12805e-70						Ppp2r3a	1.04406	2.52827e-53
Tmem158	0.332359	5.09489e-168		Krt14	1.72738	2.80249e-17						Rplp0	1.15961	1.49132e-221						Malat1	0.899838	5.78269e-92		Map2	1.7971	1.54564e-205		Rpl37a	0.282173	5.08309e-14		Gsdma	0.557538	1.83617e-69						Cpe	0.896244	4.80128e-53
Tfap2b	0.258819	7.04098e-168		Cadm1	1.70747	3.1606e-17						Ppl	0.917213	2.20884e-221						mt-Cytb	0.670054	1.49532e-91		Abca12	2.09901	2.93536e-205		Rps24	0.273583	5.99263e-14		Tec	0.915752	1.9243e-69						Mir99ahg	1.22608	5.359e-53
Igfbp3	1.56778	1.01762e-167		Arhgef16	0.404975	5.15694e-17						Sptssa	1.12606	5.54903e-221						Mark3	1.18247	2.32013e-91		Dgat2	1.28457	9.31885e-205		Evpl	0.43183	2.51133e-13		Camsap3	0.407531	3.67051e-69						Tiam2	0.689464	6.22123e-53
Col23a1	0.663145	1.4838e-167		Fam162a	1.82247	6.86228e-17						Susd2	0.719606	6.34241e-221						Nedd4l	1.16493	2.38561e-91		Pnpla1	0.564669	8.34768e-203		Rpl27a	0.287341	6.18169e-13		Ephb6	0.675395	5.1489e-69						Lmo1	0.556466	1.52005e-52
Glt1d1	0.356301	2.20296e-166		Csta1	1.67601	6.87802e-17						Fam57a	0.630112	8.27083e-221						Ppp3ca	0.990173	1.45786e-90		Hebp2	1.37824	2.60468e-199		Areg	0.541673	8.64786e-13		Stard5	0.693714	5.27667e-69						Boc	0.931814	1.61242e-52
Pou3f1	0.522698	5.90339e-166		Tnik	1.13698	1.21693e-16						Avpi1	1.1878	1.20964e-220						Clpx	0.920166	1.76819e-90		Pdzk1ip1	1.76431	6.24575e-199		Rps3a1	0.286935	9.4728e-13		Fam135a	1.10133	8.17771e-69						Zfp609	0.840841	1.80981e-52
Fgfbp1	0.753714	1.16577e-165		Ephb2	0.806735	1.27033e-16						Tdh	0.482452	2.18824e-219						Tuft1	1.04901	2.00065e-90		Dapl1	2.10277	6.36846e-196		Apoc1	0.603681	1.07424e-12		Tacstd2	1.06865	8.8113e-69						Sh3d19	0.969006	2.23805e-52
Nfix	0.966485	7.55128e-164		Flnb	1.55238	1.44943e-16						Hspa12a	0.393231	2.47491e-218						Itpkc	1.02619	2.53399e-90		Hspb1	2.54604	1.12832e-192		Sdc1	0.732368	8.8909e-12		Anxa8	1.0282	1.11784e-68						Palmd	0.874161	3.8886e-52
Lgals7	0.844205	2.12404e-163		Krt6a	1.73146	1.61755e-16						Me1	0.907653	4.68628e-218						Rnd3	1.10564	3.1712e-90		Card14	0.661094	1.23539e-190		Avpi1	0.685532	1.31692e-11		Aqp3	1.0175	1.28067e-68						Flnb	1.18705	4.7121e-52
Sh3rf2	0.514907	4.75645e-163		Tanc2	1.43737	3.25233e-16						Smagp	0.682599	5.01544e-216						Enah	1.23649	3.38049e-90		Trim2	1.43782	7.50419e-190		Rps23	0.306003	2.19363e-11		Me1	0.904889	2.55612e-68						Rfx7	1.00168	7.47418e-52
Fgfr2	0.986205	4.24989e-162		Car12	0.921225	6.26806e-16						Rab38	0.843135	9.18395e-216						Mcc	1.20541	6.09158e-90		Gjb4	0.927498	4.42953e-189		Cdh1	0.359936	4.90005e-11		Crabp2	0.808954	2.68089e-68						mt-Co3	0.608695	1.03799e-51
Mboat1	0.47447	1.67259e-161		Acsbg1	0.867221	6.29e-16						Map2	0.842853	1.59172e-213						Ikzf2	0.812358	7.48599e-90		Dsc1	1.46661	8.11924e-189		Ckmt1	0.465397	6.08789e-11		Skint10	0.643993	6.04227e-67						Mbnl2	0.809407	1.91101e-51
Smo	0.496743	5.76338e-159		Plek2	0.791886	7.50257e-16						Irf6	1.11563	1.81526e-213						Serpinb5	0.895324	9.52726e-90		Olfm2	0.785993	2.57669e-185		Rpl11	0.303372	6.89764e-11		Fhdc1	0.439009	1.98021e-66						P3h2	0.924951	6.06984e-51
Sfrp1	0.35957	7.2277e-159		Ptprz1	0.851284	8.43611e-16						Prxl2b	0.763117	4.67458e-212						Ptp4a2	1.00843	2.20726e-89		Them5	1.33181	1.06036e-184		Sqle	0.55778	3.57996e-10		Blnk	0.721238	3.9696e-66						C1qtnf12	0.577	9.55943e-51
Fam189a2	0.271841	8.44814e-159		Gsta4	0.741144	1.15783e-15						Acad9	0.620409	1.97576e-211						Arap2	0.948141	2.77794e-89		Ptk6	0.469881	8.2618e-184		Pdzk1ip1	0.430494	5.10693e-10		St14	0.650723	9.30431e-66						Adgrl2	1.11601	1.09936e-50
Lmo1	0.28571	1.63491e-158		Ppfibp1	1.04334	1.77288e-15						Cdh1	1.11791	2.56974e-211						Pls3	1.19877	1.44965e-88		Fam110a	1.06626	6.60796e-183		Abca12	0.301251	1.03443e-09		Arap2	0.936554	1.67338e-65						Ppp3ca	0.846033	2.19321e-50
Nckap5	0.749463	3.84955e-158		Vldlr	0.580823	2.19661e-15						Fxyd3	1.13697	9.50424e-210						Suco	1.04318	1.58634e-88		Ephx3	0.880226	6.64642e-182		Rps5	0.279589	1.27924e-09		Fxyd3	0.98343	1.68697e-65						Erc1	0.949179	2.64944e-50
Mthfd1	0.287564	5.89686e-158		Ift43	0.763258	3.3054e-15						Serpinb12	0.600476	6.48694e-209						Macf1	1.05105	1.85537e-88		Cst6	2.96623	6.32655e-181		2310046K23Rik	0.568849	2.21991e-09		Kank1	0.888297	1.73887e-65						Arhgap21	0.867127	3.77404e-50
Plch2	0.311358	3.20904e-157		Grhl2	0.848394	3.94442e-15						Plekha6	0.416103	7.61123e-209						Gm49890	1.02025	2.21714e-88		Gdpd3	0.660628	1.77511e-180		Tspan3	0.611777	4.60364e-09		Pawr	1.05121	6.86015e-65						Gli3	0.77946	5.91745e-50
Prxl2a	0.442186	5.13602e-157		Macf1	1.34338	1.2714e-14						Lsr	0.648737	2.48337e-207						Rora	0.937766	3.13057e-88		Lgalsl	1.2985	1.18623e-179		Tacstd2	0.517782	8.21462e-09		Kif21a	0.921211	1.20792e-64						Iqcb1	0.767387	6.57928e-50
Ptma	0.945083	1.06669e-156		Ldlrad4	1.49182	2.36964e-14						Tnik	0.930425	7.94531e-207						Arhgef11	1.07382	1.88071e-87		Rgs2	1.58159	1.27586e-179		Hsp90ab1	0.280705	1.30849e-08		Cd200	0.566421	2.392e-64						Lrig3	0.663476	1.68436e-49
Anxa2	0.859338	1.33037e-156		Mical3	0.982114	2.62697e-14						Rps26	0.915943	5.48164e-206						Casz1	1.02616	3.3564e-87		Ereg	1.61148	3.94349e-179		Nectin1	0.577498	2.19219e-08		Cecr2	0.880709	8.39657e-64						Smad1	0.861189	1.753e-49
Tenm2	0.424605	1.75566e-156		Egln3	1.13077	2.902e-14						Cldn1	0.96582	1.00184e-205						Gramd3	1.04261	1.17009e-86		Nlrp10	0.776487	5.9698e-175		Rpl32	0.300384	2.38418e-08		Tgfa	0.815104	1.31166e-63						Fgfr1	1.02376	1.83033e-49
Bcl11a	0.414689	1.96962e-156		Endou	1.06948	3.29155e-14						Pycard	1.07679	3.9795e-205						Frmd4b	0.982238	3.19635e-86		Tuft1	1.54719	9.08948e-175		Rpl10a	0.314228	4.09616e-08		Shb	0.780207	1.38728e-62						Arhgef12	0.973528	1.99178e-49
Cecr2	0.803175	3.20159e-156		Eml2	0.744525	3.49868e-14						Maob	0.270055	2.68985e-204						Ust	1.14165	2.4218e-85		Tex264	1.3966	1.04868e-172		Gphn	0.392571	4.20941e-08		Abca12	0.915699	3.7483e-62						Stim1	1.20814	4.11443e-49
Hoxa7	0.418171	1.13097e-155		Celsr1	0.611028	4.5092e-14						Tmem154	0.488544	9.60915e-204						Ocln	0.70835	1.51872e-84		Sp6	0.463441	2.33842e-172		Idi1	0.666171	4.38876e-08		Pak3	0.928285	5.26032e-62						Ahcyl2	1.02831	9.95109e-49
Sema3d	0.634552	2.70857e-155		Ppp1r14c	1.31361	5.86265e-14						Polr3g	0.591636	1.15201e-203						Pum1	1.00681	2.09044e-84		Skint5	1.35252	9.68362e-172		Cltb	0.647335	8.78366e-08		Sgpp1	0.84127	1.02547e-61						Fat1	0.837367	1.01336e-48
Mill1	0.907813	5.06403e-155		Sec14l2	0.647109	5.94941e-14						Pou3f1	0.732822	2.58704e-202						Cdyl	1.06708	2.32509e-84		Ceacam19	0.593539	2.97693e-169		Eif5a	0.52849	9.34494e-08		Rab25	0.771563	1.03441e-61						Nfix	0.960197	1.03323e-48
Chit1	0.776562	7.13445e-155		Serpine1	1.23823	1.27601e-13						Skint1	0.463438	3.55302e-201						Robo1	1.14539	2.87814e-84		Ide	1.79221	2.27107e-168		Klk7	0.877573	1.4927e-07		Cachd1	0.920671	1.53325e-61						Sntb1	0.892618	1.86998e-48
Oxct1	0.841744	1.50064e-154		Has2	0.816175	1.28079e-13						Mvk	0.380522	2.21887e-200						Exoc6b	1.03328	5.38119e-84		Tgm5	0.656908	5.25232e-164		Ammecr1	0.535685	1.91322e-07		Sbsn	1.24195	2.13779e-61						Dach1	0.713048	3.51256e-48
Nod2	0.653809	3.4109e-153		Egln1	1.22833	2.63883e-13						Dgcr6	0.835327	1.56709e-199						Vcl	1.099	7.22274e-84		Casp14	1.1991	1.30085e-163		Rps3	0.278306	3.49697e-07		Kif26b	0.811362	3.04627e-61						Shmt1	0.419654	1.45999e-47
Tenm4	0.753107	3.8028e-153		Kank1	0.861293	2.9651e-13						Slco3a1	1.10278	2.25597e-198						Fgfr2	1.02644	1.07496e-83		Pcdh1	1.10334	4.24225e-163		Rpl39	0.302362	4.34105e-07		Dusp22	0.775079	3.09717e-61						Sema5a	0.919886	3.41947e-47
Clca2	0.460556	5.5278e-153		Fat2	0.768783	3.34401e-13						Lratd1	0.524651	2.55999e-198						Tmem87a	0.919176	1.7206e-83		Dhcr7	0.824052	1.77565e-161		Eef1g	0.515186	4.75716e-07		Chchd10	0.48862	5.46707e-61						Hdgfl3	0.75859	8.8742e-47
Apoc1	0.856006	1.10822e-152		Bcar3	0.932924	4.44865e-13						Epha4	1.08761	3.09684e-198						Itga6	1.37805	2.29893e-83		Skint10	0.835308	1.36926e-160		Ppia	0.361839	8.58351e-07		Agpat3	0.747734	7.81576e-61						Ssbp2	0.974078	1.31258e-46
Mark3	0.998988	3.68697e-152		Nav2	1.07386	6.1127e-13						Tuba8	0.344419	3.02337e-197						Nfkb1	0.844125	5.89002e-83		Yod1	1.18921	2.43932e-160		Rpl3	0.301241	1.02718e-06		Ralgps2	0.784933	1.96241e-60						Itga3	0.553358	1.42205e-46
Uqcrc1	0.696712	6.64416e-152		Tnfrsf23	0.674826	7.45742e-13						AA986860	0.560753	8.42462e-196						Ankrd17	1.03928	9.6828e-83		Epcam	1.62489	6.98647e-157		F3	0.603187	1.21707e-06		Trim29	0.904904	3.74552e-60						Wwc1	0.927754	1.43228e-46
Ripk4	0.401702	4.93683e-150		Rgs12	1.06749	7.91442e-13						Nipal2	0.829383	9.50642e-196						Tra2a	0.862464	1.31127e-82		Sult2b1	1.29045	3.02211e-155		Glo1	0.614981	1.26639e-06		Nlrc5	0.918574	9.48367e-60						Dsg3	0.733708	4.89477e-46
Galnt3	0.327725	1.62658e-149		Actn1	1.3932	8.85696e-13						Prom2	0.486538	1.35146e-193						Scel	1.2204	3.51989e-82		Krt77	2.96488	3.37079e-154		Rpl8	0.278231	2.08567e-06		Nectin4	0.627916	1.14241e-59						Ankrd11	0.783188	1.15442e-45
D16Ertd472e	0.519297	2.5712e-149		Hsd17b7	0.819224	1.37147e-12						Fdps	0.840877	1.9964e-193						Arhgap32	0.986373	4.15597e-82		Bicdl1	0.990452	4.39307e-154		Ralbp1	0.56472	4.02978e-06		Bspry	0.309036	1.25103e-59						Kif13a	0.814722	1.37713e-45
Esrp1	0.701938	2.22086e-148		Myo1b	1.31355	1.81869e-12						Acsl1	0.93173	3.1778e-193						Nlrc5	0.944532	4.85536e-82		Fam89a	0.735937	2.67336e-153		Tubb2a	0.655391	4.46939e-06		Pcdh1	0.530969	2.19242e-59						Postn	1.36394	1.79653e-45
Slc25a13	0.433587	3.257e-148		Mir100hg	0.933736	1.96774e-12						Il17rc	0.654647	1.77803e-192						Sltm	1.06475	1.44833e-81		Ptrh1	0.688915	3.81443e-153		Fdps	0.63815	4.95508e-06		Afdn	1.01281	2.23042e-59						Tle4	0.950685	3.26508e-45
Tfap2c	0.431871	3.26597e-148		Plet1	0.875625	2.10198e-12						Mpzl2	0.550013	2.46597e-192						Atp11b	1.07325	3.30806e-81		Rnf39	0.484125	5.14474e-153		Pycard	0.583921	5.13262e-06		Crb3	0.478308	2.67391e-59						Trio	0.838315	3.68564e-45
Sfn	0.896623	3.32821e-148		Serpinb1a	0.968467	2.56096e-12						Cebpa	0.588248	6.49144e-192						St14	0.893381	6.48604e-81		Adgrf2	1.23079	1.20533e-151		Nebl	0.345805	1.05663e-05		Gltp	1.10711	3.7486e-59						Bmpr1a	0.871599	4.22817e-45
Irx5	0.364899	9.14528e-148		Cacna2d3	0.866306	3.09793e-12						Myh14	0.443146	2.4024e-191						Fam83b	0.870318	1.37079e-80		Tmprss13	0.892865	1.31394e-151		Serbp1	0.500927	1.78949e-05		Spink5	0.955923	7.1131e-59						Lamc2	0.518425	5.1363e-45
Mgst3	0.416732	9.66766e-148		Gys1	0.839072	3.48417e-12						Esrp1	0.905475	2.10499e-190						Fdft1	0.889535	1.42405e-80		Shroom3	1.29119	1.21494e-150		Ablim1	0.406146	2.47714e-05		Eps8l2	0.512004	7.57246e-59						Tacc2	1.13043	6.34827e-45
Ybx3	0.836517	7.62149e-147		Nectin1	1.02824	3.50064e-12						Celsr2	0.599236	3.23094e-190						Stim1	1.11205	1.97914e-80		Atp10b	0.557753	1.77971e-150		Grhl1	0.442386	3.64252e-05		Spint2	0.794121	1.00154e-58						Vps13a	0.803881	1.18378e-44
Cdh4	0.493356	3.12128e-145		Slc16a3	1.05009	4.8272e-12						Rgs20	0.780272	5.02286e-190						Pcnx	1.04268	2.14634e-80		Vgll3	1.18186	1.82486e-150		Ehf	0.411887	3.94678e-05		Pglyrp3	0.5245	1.26155e-58						Bcl11b	0.961754	1.58703e-44
Peli2	0.983492	9.97162e-145		Qsox1	0.910373	6.60407e-12						Rps8	0.852995	2.81837e-189						Ube2q2	1.21793	3.99019e-80		Ppif	1.10032	1.85962e-150		Rps15a	0.255606	4.19921e-05		Dkkl1	0.549556	3.09536e-58						Rapgef5	0.729292	4.55736e-44
Ociad2	0.280572	2.14903e-144		Rin2	0.942169	8.72524e-12						Tmem54	0.359299	4.43046e-189						Zfp654	0.976959	1.17182e-79		Eppk1	1.53076	4.88573e-150		Rpl7a	0.38385	5.83039e-05		Apoc1	0.941204	4.71599e-58						Trp53bp2	0.947086	7.28214e-44
Frmd4b	0.811639	2.81809e-143		Prss12	0.581047	9.81955e-12						Hebp2	0.523273	1.67512e-188						Tjp1	1.00589	1.21107e-79		Slc5a1	1.28536	5.35268e-150		Irf6	0.268581	0.000103449		Evpl	0.735219	4.86548e-58						Fnbp1l	0.921192	9.08345e-44
Stard10	0.375171	5.97936e-143		Dip2b	1.48126	1.34135e-11						Cdkn2b	0.295963	2.2045e-188						Trp53bp2	0.974847	1.96032e-79		Cers3	1.0272	3.63165e-149		Rpl6	0.256334	0.000157529		Gm20219	0.399355	1.39517e-57						Plet1	0.63118	9.56944e-44
Ikzf2	0.716766	8.16754e-142		Tns4	0.961199	1.49907e-11						Mfsd2a	0.392296	3.80039e-188						Senp2	0.996367	2.95208e-79		Cyp4f39	0.97032	1.51543e-148		Cd81	0.523082	0.00018396		Rnf144b	0.54202	2.93898e-57						Itgb4	0.669107	9.65288e-44
Urah	0.620715	2.969e-141		Bnc1	0.489221	1.65747e-11						Il34	0.737243	1.43116e-187						Clcn3	0.878146	7.04126e-79		Kctd11	1.19406	6.60585e-148		Rpl15	0.268432	0.000312364		Adgrf2	0.688188	6.92764e-57						Parp8	1.00887	2.38842e-43
Rnf217	0.830584	1.26824e-140		Slc10a7	0.871447	1.88021e-11						Tmem79	0.379554	4.49426e-187						Pola1	1.00995	9.31414e-79		Sprr1a	2.57705	9.17741e-148		Rpl14	0.31883	0.000417139		Epb41l5	0.611216	1.05813e-56						Ubr5	0.980072	5.7835e-43
Cdh13	0.978375	1.50766e-140		Ndrg1	1.65101	1.94608e-11						Fam135a	1.11752	5.86633e-186						Gm26688	0.447219	9.47745e-79		Tmem40	1.06404	1.4709e-147		Txn1	0.489885	0.000422397		Mfsd6	0.692905	1.17363e-56						Chd6	0.818079	6.02161e-43
Limch1	0.462655	5.88052e-140		Cotl1	1.0916	1.9553e-11						Srd5a1	0.33968	7.88536e-186						Camsap2	0.968928	1.29524e-78		Skint11	1.39087	5.21556e-147		Rpl37	0.255134	0.000610838		Ptpn13	0.849234	1.17839e-56						Prlr	0.674042	1.24708e-42
Mcc	1.06197	6.12987e-140		Pacs1	1.00376	2.15604e-11						Elovl7	0.821934	2.28238e-185						Cblb	1.30679	2.4575e-78		Myo5b	0.512827	2.27373e-146		Ppp1r14c	0.32861	0.000792558		Ndrg2	0.544428	1.65796e-56						Cask	1.05037	1.80035e-42
Tspan9	0.635824	1.86486e-139		Plau	0.587484	3.41697e-11						Ckmt1	0.770521	3.74383e-185						Klf12	1.23859	4.15479e-78		Skint6	1.42113	4.97791e-146		Qsox1	0.391028	0.000945398		Hip1r	0.51699	2.24461e-56						mt-Nd2	0.604623	2.91484e-42
Sh3d19	0.881199	2.98559e-139		Cpeb3	0.920715	3.62545e-11						Slc39a8	0.521786	4.82047e-185						Dsp	0.843232	4.98196e-78		Myo6	1.46602	3.24939e-145		Esrp1	0.381776	0.00259469		Sox7	0.455044	1.01367e-55						Dennd2c	0.852466	3.42588e-42
Usp24	0.805793	7.88149e-139		Sdc1	1.11773	4.06682e-11						Crb3	0.348304	6.97753e-185						Rnf217	1.01541	5.80046e-78		Pcsk6	0.733553	7.2906e-145		Msmo1	0.452969	0.00963229		Serpinb5	0.907497	1.02657e-55						Agrn	0.524972	6.02288e-42
Rapgefl1	0.401562	1.12847e-138		Calr	1.12443	4.19931e-11						Lgals3	1.00708	1.18966e-184						Atl2	0.877529	6.81145e-78		Nipal4	0.739087	1.07645e-143		Scpep1	0.275766	0.0141913		Hebp2	0.544574	1.16504e-55						Cdk19	0.868342	7.42646e-42
Pawr	0.770184	1.5832e-138		Serinc2	0.928153	4.2786e-11						Rbp2	0.551557	3.00883e-184						Arid4b	1.0697	1.37406e-77		Blmh	1.90616	5.68384e-143		Rpl4	0.323931	0.015532		Jup	0.748587	1.3651e-55						Cachd1	1.09584	8.02417e-42
Cdh1	0.929788	2.04855e-138		Lss	0.742119	4.38242e-11						Tiam1	1.09897	7.12771e-183						Serinc2	0.799513	4.59961e-77		Agpat5	1.70707	1.91724e-142		Stom	0.421068	0.015821		Mall	0.5387	1.47328e-55						Acvr1	0.870823	9.84711e-42
Trim7	0.346239	1.72827e-137		Cbr2	0.757812	4.87187e-11						Camsap3	0.351217	1.33389e-182						Kif21a	0.805389	1.80878e-76		Tmem265	0.760319	4.34755e-142		Tenm4	0.255795	0.0161369		Megf9	0.74563	3.11209e-55						Cobll1	0.904302	1.62022e-41
Serinc2	0.53095	1.59441e-136		Tpm2	1.06612	4.87532e-11						Adtrp	0.297639	1.36268e-182						Kmt2c	0.941415	2.51733e-76		Nectin4	1.11429	5.75705e-142		Fxyd3	0.460007	0.0173273		Phtf2	0.768868	3.63816e-55						Foxp1	1.3682	2.0472e-41
Etl4	0.672476	2.49369e-136		Kirrel	0.582942	4.94175e-11						Scnn1a	0.365479	1.43509e-182						1700025G04Rik	0.942792	3.68153e-76		Tesc	0.804258	6.17538e-142		Rpl22	0.31188	0.0215197		Map7	0.799883	7.9179e-55						Tcf7l2	0.992209	2.38136e-41
Rnf43	0.296254	1.27972e-135		Ptk2	0.847714	5.55043e-11						Fam83g	0.605165	4.74957e-182						Naa25	0.807255	4.30058e-76		Tent5b	0.489776	1.64241e-141		Spint2	0.314855	0.038634		Sptbn2	0.54798	8.30801e-55						Efnb2	0.934604	2.44301e-41
Psat1	0.32189	6.29465e-135		Amotl1	1.0046	8.11291e-11						Cers3	0.472806	4.56961e-181						Nrip1	1.0071	6.38583e-76		Mpzl3	1.30274	7.16157e-141		Rpl36	0.287503	0.0484653		Hr	0.546334	1.4979e-54						Usp24	0.808873	2.76083e-41
Adcy3	0.355626	1.06794e-134		Flna	1.25332	1.03975e-10						Fam83b	0.672394	6.6888e-181						Arhgap5	0.858075	6.45345e-76		Hopx	1.14093	1.14022e-140						Acer1	0.488646	2.39298e-54						Dgka	0.783998	3.05802e-41
Rpl13	0.737162	1.64248e-134		Ak4	0.508998	1.23217e-10						Itm2b	0.851783	9.1163e-181						Btbd11	0.806603	6.95825e-76		Dusp14	0.93546	1.3233e-140						Syne2	0.899084	3.01687e-54						Plch2	0.52641	3.84552e-41
Acpp	0.492703	2.05183e-134		Fbln2	1.14754	1.27448e-10						Rpl13a	0.87284	1.26232e-180						Garem1	0.789425	1.23301e-75		Rhbdl2	0.778742	1.80656e-139						Nrtn	0.492981	3.17071e-54						Slc38a2	1.1184	5.32315e-41
Arhgef4	0.475571	7.86769e-134		Zfp532	0.610398	1.75341e-10						Casz1	0.852538	2.41189e-180						Arhgef5	0.73282	1.88663e-75		Gan	1.72098	1.58355e-138						Pkp1	0.798844	3.59291e-54						Med13l	0.808705	8.02371e-41
Stfa3	1.40515	1.2767e-133		Gm26612	0.344995	2.0339e-10						Dusp22	0.697123	2.59472e-180						Elovl7	0.823009	2.94524e-75		Srcin1	0.60226	3.78138e-138						Ece1	1.0186	3.66243e-54						Smg1	0.910279	8.78433e-41
Itga2	0.640783	2.3803e-133		Gja1	1.13079	2.16064e-10						Rps2	0.921497	5.71603e-179						Rtn4	0.846674	4.24428e-75		Srpk1	1.71079	3.92149e-138						Pglyrp4	0.468243	3.72023e-54						Palld	1.12022	1.18346e-40
Gpsm2	0.423777	4.30572e-133		Smurf1	1.26038	2.25362e-10						Dlg2	0.664635	1.60254e-178						Ranbp9	0.941284	6.53447e-75		Skint3	1.38057	6.69057e-138						Stim1	1.026	7.40527e-54						Dmd	0.662826	1.86789e-40
Rpl4	0.791874	6.16064e-133		Ak1	0.593467	2.38219e-10						Rplp1	0.841302	1.78311e-178						Erbin	0.854985	2.32512e-74		Cptp	0.380719	1.61116e-137						Ripk4	0.549216	1.81422e-53						mt-Cytb	0.549746	4.72181e-40
Trabd2b	0.507256	2.57516e-132		Ccny	0.997301	2.85471e-10						Sdc4	1.10514	5.73766e-178						Adgrf2	1.27693	2.68302e-74		Vsig10l	0.333061	9.6597e-137						Gsn	0.997576	2.25322e-53						Ank3	0.807523	4.8064e-40
Pard3	0.777211	3.48947e-132		Anln	0.648947	4.42082e-10						Sprr1a	1.47796	1.81083e-177						Ldlr	0.91703	4.96358e-74		Ctnnbip1	1.64053	3.48857e-136						Rarres1	0.598415	2.97078e-53						Top1	0.993487	5.94455e-40
Ifi202b	1.18011	3.7244e-132		Msmo1	1.38542	4.59922e-10						Sema3d	0.640903	3.7654e-177						Usp24	0.963466	5.43241e-74		Muc15	0.379422	2.92504e-135						Fry	0.90128	3.25143e-53						Slco2a1	0.842641	6.39595e-40
Pola1	0.678325	4.59287e-132		Mast4	1.04962	5.76519e-10						Ralbp1	1.07101	1.53203e-176						Prpf39	0.926404	1.12185e-73		Bicdl2	0.419852	6.93331e-135						Ahr	0.917339	3.58092e-53						Phtf2	0.881882	8.36152e-40
Ptpn3	0.575268	7.73367e-132		Tnc	0.963681	5.87333e-10						Fut2	0.292157	3.00167e-176						Rps6ka3	1.05899	3.16024e-73		March3	1.75586	7.99836e-135						Spint1	0.383714	4.19668e-53						Bcr	0.718455	9.23529e-40
Rras2	0.643208	8.35696e-130		Rad51b	0.803948	6.42868e-10						Prrg4	0.409863	4.14577e-176						Vdr	0.6801	3.35759e-73		Homer2	1.19039	3.08417e-134						Lypd6b	0.926825	5.39431e-53						Slc7a6	0.846413	1.29959e-39
Cwh43	0.351712	2.93678e-129		Tinagl1	0.643179	7.88068e-10						Agpat3	0.682123	1.17717e-175						Cpeb2	1.23347	4.54609e-73		Usp2	0.61341	9.2626e-134						Ddr1	0.599997	5.57633e-53						Pum1	0.808206	1.88396e-39
Rpl11	0.736743	3.66914e-129		Prep	0.930998	9.40825e-10						1810037I17Rik	1.08707	1.45197e-175						Prrc2c	0.840141	6.42274e-73		Hephl1	0.507996	7.31041e-133						Zfp750	0.506861	2.4778e-52						Ankrd10	0.649541	2.40924e-39
Nipal2	0.617299	6.77435e-129		Myh9	1.01249	9.50978e-10						Lrrc1	0.88503	9.45732e-175						Slk	0.939146	8.69121e-73		Klk11	0.636289	5.69007e-132						9530059O14Rik	0.579268	2.62429e-52						Arhgef5	0.555128	2.92969e-39
C77080	0.369973	7.89057e-129		Esrp1	0.865965	9.75974e-10						Ahnak2	0.843338	1.71772e-174						Atp13a3	0.854108	9.43013e-73		Ndufa4	1.65224	2.0757e-131						Rapgefl1	0.565578	5.81117e-52						Smoc2	0.615335	4.06863e-39
Baiap2l1	0.639057	8.16388e-129		Ero1l	1.09995	9.9415e-10						Emp2	0.894452	3.60991e-174						Cds1	0.838932	9.68051e-73		Plxdc2	1.74225	2.47345e-130						Barx2	0.496813	7.52721e-52						Acvr2a	0.800522	5.00642e-39
Txndc17	0.784862	1.17449e-128		Pkp1	1.10305	1.40479e-09						Hlf	0.278695	3.81342e-174						Fubp1	0.922741	1.04207e-72		Chit1	1.39192	2.14322e-128						Adgrf4	0.566866	1.22069e-51						Dst	0.846066	6.50431e-39
Lrrc1	0.64492	3.65862e-128		Ctdspl	1.10677	1.41031e-09						Nrip3	0.260688	1.00041e-173						Serpinb2	1.17958	1.21955e-72		Tprg	1.13659	2.42211e-128						Dsc1	0.635082	1.53363e-51						Prrc2c	0.675651	8.78712e-39
Lrp4	0.417558	9.01492e-128		Ndufa4l2	1.35007	1.49406e-09						Clec2g	0.581468	1.19345e-173						Ndfip2	0.980565	1.69131e-72		Ly6g6e	0.542052	1.62055e-127						Nectin1	0.77382	2.09249e-51						Cecr2	0.9008	1.83668e-38
Il1rl2	0.671355	3.80919e-127		Fscn1	0.779839	1.9534e-09						Skint3	0.868263	2.94093e-172						Thrb	0.739612	3.72296e-72		Pak3	1.18208	3.19156e-127						Ephb2	0.510612	9.29386e-51						mt-Nd1	0.57034	5.57569e-38
Amotl1	0.618108	6.60463e-126		Schip1	1.05621	2.07236e-09						Cltb	0.91805	3.93334e-171						Top1	0.943945	6.37254e-72		Nipal1	0.744303	1.69181e-126						Stard10	0.471407	1.66052e-50						Ptpn14	0.759997	7.69686e-38
Rps4x	0.73484	1.03483e-125		Htra1	0.918542	2.24659e-09						Hspb1	1.19911	6.63388e-171						Cldn1	0.820142	6.87061e-72		Tuba8	0.557966	7.63442e-125						Hspb1	0.946994	2.37471e-50						Ctnna1	0.816533	8.70839e-38
Rpl28	0.767703	1.35954e-125		Sh3rf1	0.829151	2.61787e-09						Rapgefl1	0.560275	1.15645e-170						Trpv3	0.437065	7.4367e-72		Acpp	1.62132	9.25499e-125						Dsg1a	0.742892	3.9628e-50						Nr6a1	0.955795	8.81447e-38
Rgs12	0.466194	1.42626e-125		Asap2	0.76623	3.04396e-09						Ehf	0.907007	1.29881e-170						Appl1	0.879559	2.35009e-71		Krt10	2.35295	1.1905e-123						Reep5	0.867616	7.62272e-50						Mark3	0.801024	1.20292e-37
Slco3a1	1.00134	4.50104e-125		Mmp3	1.39522	3.28228e-09						Ovol1	0.582352	1.20627e-169						Pex14	0.843301	5.76149e-71		Gpr87	0.775632	1.90368e-123						Lipm	0.433423	1.00906e-49						Gpatch8	0.815498	1.25263e-37
Htra1	0.619014	4.89144e-125		Mrtfa	1.25771	4.07972e-09						Klf5	0.926075	2.45974e-169						B4galnt3	0.633323	6.78441e-71		Me1	1.16789	1.45969e-122						Ivl	0.441082	5.40551e-49						Osbpl3	0.788247	2.31773e-37
Nr6a1	0.847497	8.76325e-125		Maf	1.32399	4.91452e-09						Mapk13	0.49482	1.957e-168						Epb41l4b	0.688957	1.47673e-70		Osbpl1a	0.882387	2.13165e-122						Sort1	0.46661	6.09704e-49						Esrp1	0.604977	2.37655e-37
Dip2b	0.834486	1.13764e-124		Gtf2e2	0.809671	5.1939e-09						Tuft1	0.72094	3.69975e-168						Il20ra	0.560541	2.01429e-70		Adgrf4	0.955418	3.82618e-121						Bcl11b	0.684941	7.71838e-49						Pcdh7	1.0615	2.72921e-37
Pkp3	0.49309	1.33267e-124		Wnt10a	0.391421	5.39636e-09						Pkp3	0.775052	1.55175e-167						Gpr160	0.572619	2.08164e-70		C2cd2	1.01647	1.03927e-120						Eppk1	0.652117	1.03005e-48						Lrp6	0.784779	3.19954e-37
Tgfa	0.456415	1.42303e-124		Sema4b	0.665928	5.5617e-09						Ybx3	0.954175	7.01016e-167						Nectin1	0.748077	3.85533e-70		Pglyrp4	0.535803	3.99315e-120						Vangl1	0.441778	1.36618e-48						Usp47	0.846954	4.96769e-37
Irx2	0.32004	1.971e-124		Sfn	1.11036	5.70526e-09						Nipal4	0.27381	8.59188e-167						Zdhhc21	0.982134	5.81851e-70		Gjb3	0.844573	1.46548e-118						Chmp4c	0.337172	1.54878e-48						mt-Nd4	0.514217	6.55164e-37
Mir205hg	0.367401	2.91572e-124		Gli3	0.810425	6.36265e-09						Rps18	0.910443	2.54929e-166						Arhgef4	0.607231	8.60569e-70		Nfe2l3	0.459477	4.57406e-118						Ybx3	0.782446	1.88688e-48						Sinhcaf	0.474618	1.19743e-36
Ptprf	0.569021	8.37691e-124		Rras2	0.811814	6.59326e-09						S100a14	0.903982	4.53565e-166						Rgs20	0.960935	1.01231e-69		Paqr8	0.60387	5.26958e-118						Dhcr24	0.59199	4.64362e-48						Tgfa	0.654397	1.31716e-36
Bok	0.405696	1.48026e-123		Vgll4	1.18632	8.09523e-09						Eef2k	0.387342	4.71058e-166						Megf9	0.842203	1.27967e-69		Tacstd2	1.47064	1.05516e-115						Cldn4	0.746923	5.10648e-48						Actn1	0.866111	1.41812e-36
Piga	0.316698	1.82772e-123		Dip2c	1.18536	8.21027e-09						Mal2	0.397907	6.9022e-166						Agfg1	0.926109	1.52289e-69		Gltp	1.54454	6.24775e-115						Tjp2	0.928796	7.3831e-48						Krt5	0.671389	1.59369e-36
Wwc1	0.558646	8.99968e-123		Bcl11b	0.835131	8.98362e-09						Rps3a1	0.77897	1.01637e-165						Lrrfip2	0.819333	1.90169e-69		Fut2	0.508066	1.91172e-114						Irx3	0.415603	8.82775e-48						Immp2l	0.876286	2.02257e-36
Rps2	0.750888	3.21488e-122		Mthfd1l	0.70603	9.01017e-09						Pak3	0.758763	1.48951e-165						Wac	0.869006	2.51903e-69		Sptlc3	1.30575	7.49788e-114						Tfap2c	0.532259	1.04451e-47						Fto	0.725757	2.49746e-36
Rps3a1	0.663338	4.00091e-122		Trerf1	0.898033	1.04555e-08						Prnp	0.9081	2.17763e-164						Wdr61	0.760947	3.26784e-69		Il1f9	0.889007	2.9338e-112						Ank	0.634066	3.63882e-47						Rsf1	0.72741	2.74922e-36
Gtf2f2	0.780036	4.75587e-122		Lad1	0.795657	1.25535e-08						Mpzl3	0.666279	2.23765e-163						Daam1	0.89515	8.0224e-69		Mal2	0.795396	3.80566e-112						Clca3a2	0.615847	8.76545e-47						Kcnq1ot1	0.628833	3.39214e-36
Slc7a6	0.529283	4.84642e-122		Mark3	1.39197	1.28833e-08						Rpl12	0.874457	2.53423e-163						Rbms1	0.776124	8.86201e-69		Sdr16c6	0.651602	8.96878e-111						Sfn	0.774218	9.00068e-47						Tnrc6c	0.890427	3.50656e-36
Serbp1	0.723267	5.38975e-122		Slc25a13	0.794983	1.485e-08						Rps12	0.776963	3.78442e-163						Luzp1	0.859169	9.05723e-69		Thop1	0.66605	1.18761e-110						Krt23	0.436178	1.63172e-46						Col7a1	0.498571	3.87281e-36
Rps8	0.679976	2.58528e-121		Trpv3	0.420807	1.5395e-08						Tjp2	0.987691	8.67194e-163						Cnot6l	0.870039	6.61292e-68		Bspry	0.315411	1.34076e-109						Clic3	0.492484	2.07627e-46						Pcnx	0.790849	6.49316e-36
Kif13a	0.598247	1.20751e-120		Gpc1	0.732311	1.85109e-08						Mettl7a1	0.360621	3.99273e-162						Zcchc7	0.8908	6.80531e-68		Casz1	1.3187	1.50004e-109						Myo18a	0.686841	2.26648e-46						Usp34	0.729639	8.45508e-36
Rps26	0.646636	1.99541e-120		Ehbp1	0.552656	2.08282e-08						Klk11	0.293035	5.467e-162						Grhl1	0.747941	8.57016e-68		Desi1	1.13716	6.50036e-109						Rnf217	0.844293	3.19888e-46						Nrg1	2.44765	1.01732e-35
Clstn1	0.480923	4.88474e-120		Kif13a	0.949963	2.27826e-08						Rab27b	0.609348	2.33115e-161						Spag9	0.697584	8.63821e-68		Defb1	0.927193	1.56015e-107						Slc25a25	0.770507	3.47196e-46						Acsl3	0.61764	1.31481e-35
Znrf3	0.624904	6.58472e-120		Jarid2	0.964123	3.21838e-08						Asprv1	0.773453	2.97444e-161						Rictor	0.807672	1.00913e-67		Csnk2a2	1.26423	3.11152e-105						Fam83b	0.575176	5.53223e-46						Bmpr2	0.836249	1.62611e-35
Spint2	0.531059	7.4538e-120		Adarb1	1.03989	3.63743e-08						Slc5a1	0.789009	3.3676e-161						Smad1	0.897373	2.16043e-67		Fam135a	1.41704	7.91132e-105						Fam89a	0.387437	8.42452e-46						Nebl	0.915975	1.77193e-35
Rpl3	0.735844	7.92899e-120		Jag2	0.514243	3.89687e-08						Epha1	0.300315	6.87096e-161						Rfx7	0.816237	3.30716e-67		Dab1	0.62948	9.89037e-105						Sult2b1	0.536981	1.00034e-45						Arid1b	0.727888	6.55019e-35
Gm15987	0.819211	1.25291e-119		Has3	0.580738	5.2752e-08						Tspan5	1.01411	8.6384e-160						Cobll1	0.847159	3.38509e-67		Scnn1a	0.483698	9.98288e-105						Slc12a2	0.618175	1.33843e-45						Mill1	0.721872	7.57862e-35
Rps5	0.757342	5.47447e-119		Itpr3	1.06221	5.61355e-08						Tyro3	0.273218	2.74159e-159						Atxn1	0.944571	3.58737e-67		Lmo7	1.06765	4.58864e-104						Tmem265	0.416409	1.46335e-45						Arl15	0.790622	1.00371e-34
Cd2ap	0.797698	9.1401e-119		Rere	1.08161	6.14331e-08						Fabp5	1.07363	5.1077e-159						Smg7	0.922131	4.04247e-67		Ggct	1.56192	2.47795e-103						Il34	0.551371	1.64591e-45						Sos2	0.720464	1.02731e-34
Tacc2	0.630214	1.13125e-118		Myof	1.04488	6.41364e-08						Gsdmc	0.668494	1.67727e-158						F11r	0.839703	8.07034e-67		Evpl	1.07218	3.38749e-101						Tmprss4	0.6673	2.5551e-45						Fam135a	0.759398	1.07812e-34
Zfp654	0.736802	1.31694e-118		Ank3	0.844286	7.67965e-08						Rpl8	0.805623	3.82794e-158						Stim2	0.894937	8.55846e-67		Ybx3	1.22333	1.87367e-100						Garem1	0.637764	2.71837e-45						Firre	0.436838	1.09947e-34
Slc38a2	0.802858	2.29769e-118		Cald1	1.12119	7.73349e-08						Wdr47	0.584993	4.00292e-158						Jup	0.676122	1.17557e-66		Nebl	0.950841	3.67716e-100						Ahnak2	0.781593	8.07902e-45						Mbnl1	0.788252	1.48141e-34
Rplp0	0.771536	5.09054e-118		Cenpe	0.629111	9.16622e-08						Dsc1	0.530949	1.76074e-157						Gm44613	0.779708	1.8654e-66		Dsg1a	1.51049	1.03641e-99						S100a16	0.779834	2.55307e-44						Large1	0.822193	1.69332e-34
Ralgps2	0.609858	7.72882e-118		Dsc3	1.05003	1.09909e-07						Sgpp1	0.784656	7.15961e-157						Taf15	0.9392	3.01106e-66		Tjp3	0.339391	1.40736e-99						Net1	0.638231	2.56981e-44						Kalrn	0.862626	2.7555e-34
Lad1	0.306999	1.0558e-117		Pdia6	0.862646	1.12875e-07						Rps5	0.854017	1.58498e-156						Clip4	0.867102	3.23794e-66		Ehf	1.21408	1.47482e-99						Aldh3b2	0.420146	3.06934e-44						Stag1	0.746932	3.04087e-34
Syne2	0.771963	1.31279e-117		Camsap2	1.13144	1.1387e-07						Lancl1	0.571147	2.73178e-156						Cast	0.878831	3.42737e-66		Tob1	1.05022	1.64372e-99						Slc39a8	0.598817	3.09743e-44						Frmd6	0.804843	5.3285e-34
Dkc1	0.28505	1.34433e-117		Soga1	0.657228	1.21431e-07						Herc4	1.02015	1.09059e-155						Arl5b	0.923643	5.93991e-66		Proser2	0.487102	1.645e-99						Tnfrsf19	0.532246	3.94113e-44						Ptprs	0.651812	5.95993e-34
Cpox	0.337151	2.19992e-117		Mmp28	0.50992	1.48799e-07						Rpl10a	0.864806	1.53887e-155						Vps13a	0.851537	7.05154e-66		Csnk2b	1.16118	4.38614e-98						Mtfr1	0.357568	5.06114e-44						Tent4b	0.749074	1.0608e-33
Orc6	0.253158	2.3944e-117		Nt5dc2	0.703492	1.71231e-07						Tuba4a	0.863273	3.14118e-155						Ube2g1	0.853873	1.1196e-65		Miga2	0.324634	6.21647e-98						Slk	0.947812	6.35097e-44						Irx5	0.500659	1.08084e-33
Rpl12	0.748526	2.52091e-117		Plec	1.08719	1.72703e-07						Rpl13	0.751286	3.14488e-155						Ptprg	0.771092	1.58792e-65		Tuba4a	1.2856	2.91111e-97						Arhgef37	0.441036	8.98258e-44						Peli2	1.0227	1.45799e-33
Rgmb	0.342258	2.94267e-117		Gm44613	0.49778	1.79498e-07						Gdpd2	0.322646	5.67353e-154						Net1	0.671075	1.73083e-65		Egr3	0.870301	3.52763e-97						Insig2	0.663177	9.3284e-44						Myo10	0.705259	1.50754e-33
Rps6	0.726658	3.13306e-117		Adgrg1	0.577963	1.8989e-07						Tec	0.819025	6.83046e-154						Cdh4	0.585045	2.36704e-65		Grhl1	0.939923	6.49335e-97						Hadh	0.535827	2.30698e-43						Tnks2	0.840848	1.61918e-33
Fbxo36	0.378739	8.78228e-117		Fzd6	0.677745	2.04205e-07						Tmem40	0.372195	1.0216e-153						Skint11	1.02907	2.93618e-65		Efna3	0.515129	9.32427e-96						Plekha6	0.453169	2.7193e-43						Strn3	0.697439	2.76152e-33
Herc4	0.942551	1.06001e-116		Hook1	0.769484	2.19536e-07						Itpr3	0.692573	1.13904e-153						Gpatch8	0.835156	3.29056e-65		Ppfia3	0.345614	5.7949e-95						Hopx	0.553719	3.47637e-43						Tra2a	0.758461	2.76511e-33
Aqp3	0.72896	2.04654e-116		Rreb1	1.00062	2.38393e-07						Sdr16c6	0.442772	8.04334e-153						Clasp2	1.01455	3.83732e-65		Atp6v0a4	0.49029	8.72784e-95						Fdft1	0.605616	3.52214e-43						Iffo2	0.779833	3.04864e-33
Rps16	0.673876	2.3501e-116		Ttll7	0.364207	2.47756e-07						Rab3d	0.54067	1.90419e-152						Cdk19	0.8932	3.87745e-65		Arhgap32	1.25356	9.20667e-95						Clip1	0.817565	3.65157e-43						Rev3l	0.729217	3.13529e-33
Dgcr6	0.463304	2.55075e-116		Vcl	0.945043	2.7434e-07						Rpl5	0.812745	2.67035e-152						Wwtr1	0.967633	1.5906e-64		Mapk13	1.06992	2.93076e-94						Ssbp2	0.597272	5.10844e-43						Neo1	0.663969	3.39866e-33
Itgb6	0.366943	2.85679e-116		Aqp3	1.03225	3.21191e-07						Fdft1	0.745798	4.61046e-152						Arntl	0.788171	2.04411e-64		Acsbg1	0.698308	7.67635e-94						Lmtk2	0.71734	8.06801e-43						mt-Co2	0.462484	4.86297e-33
Ncl	0.790369	4.70569e-116		Fbxw4	0.388559	3.90065e-07						Scd1	0.475057	5.97552e-152						Cnot2	0.801132	2.89135e-64		Plet1	1.47098	8.57109e-94						Plch2	0.3134	1.71683e-42						Stmn1	0.691451	5.10822e-33
Stmn1	0.754084	7.09529e-116		Ass1	0.794935	4.31768e-07						Itpkc	0.885625	9.24292e-152						Mreg	0.673754	3.13345e-64		Serpinb8	1.00682	2.57106e-93						Ankrd22	0.590921	3.11401e-42						Srrm2	0.611493	5.24171e-33
Capns2	0.332165	9.74621e-116		Sh3kbp1	0.757804	4.76353e-07						Lad1	0.404402	1.48468e-151						Arih1	0.809972	5.04459e-64		Sc5d	0.86495	7.14873e-93						Lypd3	0.682894	7.06629e-42						Pxdc1	0.750221	6.66173e-33
Rpl10a	0.747947	1.02402e-115		Smtn	0.440507	5.01337e-07						Aadac	0.285314	2.37976e-151						Gm2164	0.509361	6.72443e-64		Skint9	1.04991	6.05417e-92						Osbpl3	0.755269	8.27018e-42						Cnot6l	0.779415	9.78214e-33
Rpl30	0.652907	1.28363e-115		Ptk2b	0.689514	5.0735e-07						Rpl27a	0.74212	1.6067e-150						Fcgbp	1.24263	7.66007e-64		Myh14	0.687207	7.20985e-92						Cobll1	0.656891	1.30777e-41						Usp9x	0.818341	1.10792e-32
Glo1	0.480656	1.35922e-115		Ajuba	0.445065	5.08394e-07						Erbb2	0.365042	1.9187e-150						Kdm6a	0.914085	2.10292e-63		Grhl3	0.629566	8.80539e-92						Fam25c	0.802125	1.33377e-41						Fxyd3	0.800931	1.69971e-32
Hmgb1	0.861181	2.99404e-115		Fgfbp1	0.89717	5.38201e-07						Sqle	0.558013	1.94126e-150						Ahcyl2	0.889075	3.19316e-63		Klf4	1.18626	1.28513e-90						Inava	0.367078	1.79259e-41						Rasal2	0.657924	1.93776e-32
Agrn	0.325462	7.38934e-115		Hbegf	0.910601	5.48253e-07						Ankrd22	0.550151	2.12611e-150						Tspan9	0.767597	7.43805e-63		Hspb8	0.8517	1.52092e-90						Trbc2	0.442281	2.01941e-41						Arap2	0.644474	2.18053e-32
Skint1	0.265428	1.12246e-114		Fut8	1.08085	5.91675e-07						Cyp51	0.714519	3.14206e-150						Il1rl2	0.816084	1.42787e-62		Exph5	0.756999	2.03537e-90						Rab38	0.582803	2.03045e-41						Skint4	0.533161	3.06005e-32
Camsap2	0.700138	3.51828e-114		Eogt	0.478256	6.08957e-07						Ptprf	0.719488	3.61124e-150						Rab40c	0.754453	1.56805e-62		Msmo1	1.05636	3.47453e-90						Clpx	0.624353	3.05827e-41						Net1	0.658716	5.00353e-32
Rpl6	0.701608	7.29359e-114		Pdk1	0.686701	6.98782e-07						Nectin1	0.843782	6.31292e-150						Dgka	0.693993	1.60867e-62		Dsp	1.30811	9.12439e-90						Sdc1	0.709412	3.53284e-41						Msi2	0.742952	5.1669e-32
F2rl1	0.352883	1.54921e-113		Tenm3	0.504588	7.06835e-07						Grhl3	0.288628	7.17349e-150						Sptlc2	0.930441	1.90204e-62		Gramd3	1.11549	2.58712e-89						Mapk13	0.467052	3.71738e-41						Enah	0.76584	5.20054e-32
Sema4b	0.47965	1.84854e-113		Cdc42bpa	0.782305	7.82313e-07						Atp10b	0.251199	9.77034e-150						Itgb6	0.604291	2.86613e-62		Fam57a	0.80123	4.97972e-89						Lrig1	0.769243	4.50342e-41						Ctnnd1	0.712849	5.72073e-32
Rpl13a	0.659937	2.45671e-113		Flrt3	0.700926	7.9371e-07						Rpl23a	0.770795	2.53513e-149						Mbtd1	0.905884	4.45216e-62		Il18	1.2579	6.28892e-89						Palmd	0.562426	5.14735e-41						Atrx	0.689204	5.81704e-32
Arhgef5	0.379626	5.40826e-113		Bcam	0.491788	8.7533e-07						Ablim1	0.846307	2.73412e-149						Rasa1	0.792112	4.68841e-62		St14	0.830984	8.72463e-89						Trim2	0.562454	5.17995e-41						Slmap	0.756368	1.23039e-31
Yap1	0.695805	1.16487e-112		Galnt3	0.735122	8.85311e-07						Maoa	0.820491	3.30636e-149						Acpp	0.605809	5.69213e-62		Defb6	1.25082	1.19928e-87						Tfap2a	0.466344	6.72882e-41						Nup153	0.736727	1.83818e-31
Prc1	0.503843	1.7203e-112		Maml2	0.767088	9.58084e-07						Ralgps2	0.731867	3.49256e-147						Tra2b	0.786514	1.18288e-61		Teddm3	0.641783	1.35091e-87						Itprid2	0.755888	9.20669e-41						Mcc	0.774832	3.8998e-31
Ptk7	0.356257	2.41483e-112		Ptpre	0.754236	9.72469e-07						S100a16	0.869075	6.30635e-147						Afdn	0.741317	1.72855e-61		Skint4	0.618082	6.60521e-87						Sh3d19	0.644693	1.07804e-40						Nasp	0.757407	4.2938e-31
Mreg	0.332589	2.50083e-112		Dsp	0.81918	1.10163e-06						Skint4	0.356792	9.35231e-147						Pla2g4f	0.633478	1.76801e-61		Stard4	0.739831	1.18834e-86						Map2	0.581469	1.87249e-40						Fhit	0.985056	4.40828e-31
Rpl22	0.665771	2.52497e-112		Pitpnc1	0.560121	1.17309e-06						Gsn	1.06936	1.56112e-146						Ptprf	0.606375	1.99329e-61		Ank	0.8647	3.71823e-86						Tspan5	0.93089	2.03022e-40						Epb41l5	0.608971	5.90969e-31
Hras	0.516803	2.82346e-112		Hsp90b1	0.964798	1.18717e-06						Map2k4	1.00566	1.9384e-146						Wdr47	0.66714	2.24717e-61		Rhof	0.488252	8.37373e-86						Pou2f3	0.718546	2.34854e-40						Ptk7	0.56971	7.36219e-31
Shroom2	0.349511	1.41582e-111		Fam126a	1.10779	1.2288e-06						Nrtn	0.331858	3.62982e-146						Abhd6	0.674368	3.28885e-61		Elovl6	0.744114	9.05301e-86						Ctnna1	0.773304	2.48732e-40						Mllt3	0.735504	8.19487e-31
Prep	0.468007	1.52602e-111		Prdm10	0.617287	1.23039e-06						Tacc2	0.756247	4.87781e-146						Cnot4	0.801706	3.56682e-61		Csta1	1.01958	2.82711e-85						Hacd3	0.577685	2.74954e-40						Tiam1	0.822082	1.02932e-30
Tmem245	0.488457	2.03045e-111		Atp2c1	0.733479	1.26519e-06						Tenm4	0.713238	5.57433e-146						Mbd2	0.797711	5.87558e-61		Laptm4b	0.814618	3.06207e-85						Pard6g	0.591721	3.1216e-40						Scmh1	0.893877	1.61896e-30
Ggct	0.630934	2.42282e-111		Cwh43	0.491598	1.28278e-06						Pou2f3	0.527852	6.48745e-146						Myo18a	0.679711	1.44992e-60		Rab27b	0.779295	3.77035e-85						Erbb2	0.380996	3.4546e-40						9930021J03Rik	0.68408	1.62336e-30
Rps12	0.647448	2.49908e-111		Rab30	0.621504	1.30625e-06						Bag1	0.880233	7.77243e-146						Cask	0.831006	1.63882e-60		Arhgef5	0.873181	1.64257e-84						Peli1	0.852435	3.48981e-40						Ubap2	0.735133	1.63195e-30
Grpel2	0.33219	2.87116e-111		Erp44	0.901981	1.40627e-06						Cyp2j6	0.357783	8.17213e-146						Larp4b	0.734055	1.93096e-60		Ugcg	1.16626	1.83179e-84						Tacc2	0.683591	4.08509e-40						Scel	0.864113	1.68585e-30
Rps19	0.672338	1.06382e-110		Fgfr3	0.501282	1.53434e-06						Olfm2	0.25614	1.05359e-145						Mon2	0.783234	3.27678e-60		Trim29	1.11221	3.05046e-84						Itpr3	0.592208	4.95141e-40						Daam1	0.727685	1.77349e-30
Rpl15	0.723602	2.18205e-110		Agbl3	0.433748	1.53603e-06						Itprid2	0.923128	2.98516e-145						Galnt3	0.447329	3.4302e-60		Slc22a23	0.810932	8.11107e-84						Sntb1	0.550589	5.07125e-40						Spred2	0.732813	2.10565e-30
Rps15	0.655926	2.60526e-110		Mst1r	0.503278	2.10576e-06						Rps27a	0.711972	3.22756e-145						Dnmbp	0.861783	4.04413e-60		Mall	0.662671	1.12152e-83						Lrig3	0.409578	5.84499e-40						Baiap2l1	0.782088	3.15051e-30
Epb41l5	0.431206	2.64769e-110		Cstdc5	0.966012	2.16619e-06						Stard10	0.416333	3.72263e-145						Tmtc2	0.836816	7.8302e-60		Slc6a20a	0.341329	3.25515e-83						Abtb2	0.964085	7.23888e-40						Ncoa1	0.799895	3.71023e-30
Cxcl14	0.635601	2.71565e-110		Pde7a	0.734188	2.31177e-06						Rps15	0.751323	6.32697e-145						Usp47	0.883838	8.70583e-60		Kif13b	1.2254	3.4052e-83						Fam83g	0.496889	1.2808e-39						Setbp1	0.995159	4.16615e-30
Lgr4	0.440156	5.85369e-110		Hoxb2	0.32852	2.35148e-06						Rpl14	0.82758	2.14225e-144						Wdr20	0.66056	9.49907e-60		Blnk	0.90053	4.26739e-83						Krtdap	1.02709	1.36698e-39						Celsr2	0.446325	4.54302e-30
Rps18	0.748832	9.09762e-110		Mad1l1	0.753388	2.4208e-06						Rps16	0.734636	6.37745e-144						Cpne8	0.895828	1.04953e-59		Ocln	0.756345	2.34127e-82						Epn2	0.568882	1.52641e-39						Car12	0.711525	4.5471e-30
Hagh	0.391877	9.488e-110		Morc4	0.342784	2.43765e-06						Rpl30	0.734987	2.45182e-143						Peli2	1.17445	1.12582e-59		Perp	1.19737	3.2942e-82						Chl1	0.614774	1.77659e-39						Kmt2c	0.713252	5.58899e-30
Vdr	0.39476	1.84965e-109		Nhs	0.599714	2.4777e-06						Mindy3	0.914537	5.99644e-143						Kdm4c	0.69553	1.18377e-59		Elovl7	0.927834	1.19763e-81						Wdr47	0.434945	1.8039e-39						Gatad2b	0.661888	6.12189e-30
Myo10	0.77121	4.27184e-109		Dusp7	0.654007	2.60497e-06						Eps8l2	0.346157	6.24414e-143						Mboat1	0.581256	1.4459e-59		Rgs20	0.934238	3.71937e-81						Crip2	0.65636	3.45164e-39						Naaladl2	1.34689	8.30013e-30
Trp53bp2	0.670408	5.78273e-109		Cep290	0.505489	2.8057e-06						Dffa	0.281371	1.65272e-142						Zc3h7a	0.776551	2.53788e-59		Map1lc3a	1.25938	6.48701e-81						Crybg1	0.607868	4.89826e-39						Map3k1	0.778936	9.20941e-30
Tiam1	0.793004	9.22496e-109		Cyp7b1	0.81177	2.84702e-06						Cxadr	0.758323	7.84662e-142						Slc25a13	0.587524	5.92445e-59		Bbox1	0.632807	2.11903e-80						Kifc3	0.400157	6.47383e-39						Gas1	0.568261	9.56507e-30
Wdr61	0.537576	1.37513e-108		Kcnq5	0.902677	2.97686e-06						Lrp4	0.429146	1.58441e-141						Fnbp1l	0.8461	6.38884e-59		Btg2	1.25506	2.02692e-79						Map2k4	0.771605	8.62309e-39						Gm47283	0.627478	9.65385e-30
Rpl32	0.753562	1.44043e-108		Homer3	0.59189	2.99819e-06						Eif5a	0.806685	1.59343e-141						Ttc37	0.675826	1.4384e-58		Ankrd35	0.685004	2.13137e-79						Calm2	0.751033	9.78463e-39						Tfap2a	0.609407	1.03801e-29
Arhgap5	0.683623	1.559e-108		S100a6	1.13959	3.33499e-06						Tmprss13	0.287178	1.92227e-141						Trim7	0.485568	1.44393e-58		Gjb5	0.825252	3.80174e-79						Klk8	0.606133	1.00209e-38						Crybg1	0.873974	1.21936e-29
Nfia	0.86127	1.65511e-108		Erc1	0.902119	3.74353e-06						Klk8	0.447901	2.4176e-141						Ubn2	0.80147	1.73259e-58		Tjp2	1.20038	1.05505e-78						Csnk2a2	0.725164	1.1414e-38						Ptpn3	0.6164	1.34488e-29
Prkci	0.57707	2.30909e-108		Dock9	0.784826	3.80478e-06						Dstn	0.766764	4.0697e-141						Cdk6	0.8065	2.29444e-58		Emp2	1.12858	1.36856e-78						Afap1l2	0.498244	1.17164e-38						Ctdspl	0.615237	1.44431e-29
Lypd6b	0.575441	2.61888e-108		Ube3c	0.742616	3.85877e-06						Trim7	0.322791	5.21354e-141						Tacstd2	0.66942	2.90305e-58		Gm20219	0.43627	1.51489e-78						Luzp1	0.762421	2.32689e-38						Sgk3	0.777144	1.49427e-29
Spred2	0.570318	3.73557e-108		Macrod2	1.08008	3.95602e-06						Bpifc	0.316182	7.11314e-140						Rab10	0.835995	3.11273e-58		Lypd3	1.23355	4.71228e-78						Itpkc	0.732082	2.53136e-38						Arl13b	0.760774	1.49748e-29
Mllt3	0.60583	7.91686e-108		Klc1	0.737847	4.17385e-06						Tecr	0.810243	1.56063e-138						Mtmr1	0.667624	4.61872e-58		Llgl2	0.458683	1.61726e-77						Scnn1a	0.329636	2.56168e-38						Ankrd17	0.774769	1.88931e-29
Nolc1	0.357759	1.15485e-107		Cast	0.819644	4.46794e-06						Eef1a1	0.683209	2.06981e-138						Golga4	0.799436	7.13249e-58		Gdpd2	0.470122	1.12891e-76						Kctd1	0.43949	2.61279e-38						Senp6	0.651889	2.47267e-29
Sprr2a3	0.713013	1.78272e-107		Fer	0.844473	4.72151e-06						Rpsa	0.735255	2.15852e-138						Ankrd22	0.707198	8.49207e-58		Sphk1	0.678693	2.58915e-76						Tuft1	0.520125	2.87317e-38						Usp53	0.701385	2.5675e-29
Rab30	0.403619	4.2493e-107		Papss2	0.652767	5.81077e-06						Hsdl2	0.490594	2.74064e-138						Med13l	0.693535	8.99525e-58		Ahnak2	0.955791	4.31687e-76						Arhgef5	0.456298	4.66793e-38						Ncl	0.611531	4.99454e-29
Xrn2	0.688672	6.19335e-107		Trak1	0.736234	5.8506e-06						Teddm3	0.31873	8.31876e-138						Luc7l3	0.815054	1.09708e-57		Vstm5	0.427208	1.77759e-75						Ablim1	0.625007	4.71148e-38						Cd109	0.700784	5.37862e-29
2510002D24Rik	0.251965	7.3604e-107		Ercc1	0.376852	5.93253e-06						Erbb3	0.489168	9.05654e-138						Sptlc3	1.22257	1.94761e-57		Sdr16c5	0.717757	2.06757e-75						Shroom2	0.399803	1.24876e-37						Ptprf	0.58204	5.56634e-29
Rpl17	0.668092	1.3734e-106		Endod1	0.66058	5.94114e-06						Cttnbp2	0.481792	9.13767e-138						Zfyve9	0.779187	2.37584e-57		Ace2	0.524775	2.42734e-75						Gpr87	0.370564	1.41709e-37						Aff1	0.823598	6.8415e-29
Sun1	0.448267	4.14084e-106		Pcyox1	0.647588	6.31387e-06						Nhp2	0.691439	1.46305e-137						Gk	0.917958	2.99017e-57		Tmem45a	1.22824	1.18046e-74						Pls3	0.648083	1.84598e-37						Nipbl	0.59058	8.841e-29
Nfib	0.622969	6.71258e-106		Fam83g	0.576075	7.03994e-06						Mall	0.427019	1.41047e-136						Cers3	0.548272	4.64522e-57		Pard6b	0.354115	1.3864e-73						4833423E24Rik	0.377438	2.80319e-37						Ryk	0.612429	1.05761e-28
Panx1	0.317965	7.38407e-106		Nav1	0.852184	7.0923e-06						Cd2ap	0.953873	1.84069e-136						Ppp2r5e	0.75577	4.95263e-57		Lsr	0.78468	1.41273e-73						Fnbp1l	0.702849	3.40834e-37						Luc7l3	0.688602	1.21325e-28
Rps27a	0.630295	1.11263e-105		Atp9a	0.670995	7.40843e-06						Rps4x	0.753482	2.02078e-136						Actr3	0.649349	5.64671e-57		Acer1	0.623412	2.40632e-73						Bok	0.550204	3.86275e-37						Bcam	0.450242	1.3305e-28
Trim16	0.279388	1.17409e-105		Stfa1	0.910425	7.59547e-06						Rpl15	0.801314	2.50017e-136						Hacd2	0.740844	6.18251e-57		Macc1	0.639593	1.04076e-72						Ephx3	0.313191	4.35713e-37						Naa15	0.623976	1.74249e-28
Stim1	0.817157	2.0512e-105		Dock5	0.713035	7.62602e-06						Bok	0.546826	7.11383e-136						Ripk4	0.505976	6.41739e-57		Prdx5	0.965746	2.11298e-72						Irf6	0.472506	4.52065e-37						Srsf3	0.610807	1.92092e-28
Phldb2	0.610828	2.6629e-105		Taf4b	0.66838	7.74942e-06						Rps20	0.736152	7.47389e-136						Cstf3	0.640382	6.65149e-57		Itprid2	1.04461	2.33402e-72						Dsc3	0.598559	5.9537e-37						Rapgef2	0.977064	2.35851e-28
Fam83g	0.327863	2.74218e-105		Lamb1	0.408983	7.92459e-06						Trbc2	0.283791	1.28793e-135						Pof1b	0.969575	7.17288e-57		Ptgs1	1.00607	6.65856e-71						Gjb4	0.28202	6.03316e-37						Srsf7	0.644729	3.05868e-28
Sh3rf1	0.566596	2.85475e-105		Tmem140	0.629808	9.53691e-06						Klf4	0.821761	3.30815e-135						Mbp	0.642909	8.73238e-57		Tubb2a	1.30926	7.01519e-71						Cysrt1	0.368567	6.43341e-37						Scaf8	0.733091	3.57194e-28
Snhg1	0.519799	4.75199e-105		Areg	0.588963	9.78244e-06						Dynll1	0.903861	6.33921e-135						Slc25a25	0.79354	8.90363e-57		Cyp51	0.95453	1.12605e-70						Bnipl	0.281533	7.50692e-37						Tmem245	0.653186	3.89995e-28
Rpl7	0.633766	1.01711e-104		Lima1	0.776317	1.04291e-05						Tspan8	0.487354	1.27933e-133						Stam	0.771162	1.0269e-56		Kifc3	0.712578	1.51685e-70						Pycard	0.695541	8.49605e-37						Kdm6a	0.745104	5.61887e-28
Rpl21	0.651217	1.09358e-104		Ahcyl2	1.00213	1.13543e-05						Rps25	0.692612	2.66601e-133						Chit1	0.848626	1.46739e-56		Ndfip2	1.13733	1.63052e-70						Mid2	0.560528	9.4793e-37						Dip2b	0.66323	6.05966e-28
Dusp7	0.429005	1.89303e-104		Rcor3	0.500655	1.15419e-05						Hras	0.702648	3.00793e-133						Rc3h1	0.741389	1.77099e-56		Cltb	0.923545	2.29813e-70						Tmem159	0.493981	1.08701e-36						Ror1	0.942034	6.1056e-28
Zfp1	0.27042	1.9234e-104		Cdc25b	0.395504	1.18987e-05						Nipal1	0.270958	3.3622e-133						Rcor1	0.810285	1.94644e-56		Phldb3	0.439044	2.30756e-70						Ckmt1	0.454369	1.22272e-36						Brwd1	0.699125	6.44055e-28
Wls	0.6369	2.55781e-104		Sema6d	0.412081	1.20247e-05						Hmgn1	0.791879	3.89448e-133						Fbxo11	0.740265	2.39031e-56		BC016579	0.519109	3.38021e-70						Mindy3	0.733112	1.36312e-36						Calm2	0.681083	9.23619e-28
C1qbp	0.368087	4.8307e-104		Mical2	0.630557	1.25645e-05						Clu	0.521889	4.10279e-133						Flnb	0.830269	2.53445e-56		Klc3	0.733581	4.82973e-70						Btbd11	0.604322	1.37237e-36						Sos1	0.610148	1.02032e-27
Tmpo	0.492108	7.32026e-104		Anxa1	1.00769	1.2677e-05						Rps9	0.654639	4.18153e-133						Wee1	0.737174	4.06923e-56		Hip1r	0.694661	1.55805e-69						Tjp1	0.620614	2.59396e-36						Nfat5	0.766945	1.05829e-27
Dsp	0.586235	1.28321e-103		Sh3pxd2a	1.03578	1.28163e-05						Dhcr7	0.260818	5.7188e-133						Psme4	0.807464	6.12869e-56		Fdps	1.21065	3.11017e-69						Ptprf	0.538956	2.74176e-36						Mast2	0.7851	1.36165e-27
Rpl5	0.648395	1.42068e-103		Ncapd3	0.443961	1.3294e-05						Tmem238	0.318052	6.97602e-133						Macc1	0.687019	6.5599e-56		Cldn1	0.886354	1.01261e-68						Cdcp1	0.62384	2.83067e-36						Filip1l	0.579938	1.5093e-27
Rps20	0.654614	2.94029e-103		Igf2bp2	0.77083	1.41854e-05						Rpl11	0.732803	4.55021e-132						Bmpr2	0.802068	1.6382e-55		Sdr42e1	0.389394	1.70673e-68						Sptlc3	0.437576	3.89224e-36						Spint2	0.549084	1.59739e-27
Ust	0.827667	4.27246e-103		Anxa2	0.844474	1.45849e-05						Sh3rf2	0.395007	4.89658e-132						Fbxw11	0.776203	2.21595e-55		Ndrg2	0.513503	4.30736e-68						Nipal1	0.32137	6.6953e-36						Ttc3	0.718696	1.69675e-27
Rps7	0.707945	7.69239e-103		Limk1	0.331684	1.53836e-05						Rhod	0.367011	1.09438e-131						Slc1a1	0.773977	3.38636e-55		Tubb4b	1.12198	2.17822e-67						Rhbdl3	0.368367	6.99803e-36						Arhgap32	0.65279	2.19861e-27
Ptpn4	0.487827	9.5418e-103		Tnk2	0.458817	1.64448e-05						Rps7	0.796705	1.20722e-131						Znrf3	0.826665	3.65635e-55		Dlg3	0.349284	2.92827e-67						Cdsn	0.645767	1.0257e-35						Rnf169	0.617727	2.65522e-27
Ppia	0.641479	1.0556e-102		Rps6ka1	0.414499	1.91555e-05						Il20rb	0.528541	3.6189e-131						Erbb3	0.57638	4.14525e-55		Eps8l2	0.700245	1.0224e-66						Aopep	0.737701	1.36971e-35						Kmt2a	0.723999	2.69456e-27
Adgrg6	0.50953	1.08785e-102		Pard6g	0.668852	1.98693e-05						Ormdl2	0.382962	6.496e-131						Acsl1	0.786366	4.96505e-55		Tmem79	0.480033	2.36883e-66						Kalrn	0.51163	2.38265e-35						Map3k20	0.603008	2.79687e-27
Serpinb5	0.565197	1.17882e-102		Carmil1	0.712287	2.18918e-05						Macc1	0.441736	1.50692e-130						Pik3cb	0.800165	8.15466e-55		Usp6nl	1.10485	2.71586e-66						Cdc42bpg	0.320012	4.61195e-35						Srek1	0.645422	3.37234e-27
Fam162a	0.778838	1.49393e-102		Tspan9	0.870457	2.28162e-05						Fam210b	0.258351	3.46279e-130						Phactr2	1.03552	1.17709e-54		Gm15987	1.14652	5.34641e-66						Capns2	0.413776	5.72665e-35						Hacd3	0.560595	3.45337e-27
Usp10	0.364442	2.97085e-102		Glo1	0.715138	2.31715e-05						Serpinb3b	0.284332	4.43951e-130						Thoc2	0.791049	1.24911e-54		Ptpn21	0.577755	1.21195e-65						Ripk2	0.67156	6.24329e-35						Pdzd2	0.727495	3.63672e-27
Bag4	0.283012	3.20565e-102		Nabp1	0.492888	2.49485e-05						Ocln	0.416134	3.31123e-129						Slc38a2	0.800608	1.35099e-54		Pmvk	0.714895	1.42911e-65						Mpzl3	0.524056	6.86033e-35						Slc20a2	0.555871	4.87368e-27
Rps13	0.608003	3.44862e-102		Apbb2	0.617412	2.63581e-05						Rack1	0.717779	3.47552e-129						Sppl3	0.789472	1.43409e-54		Camsap3	0.378415	2.78932e-65						Mst1r	0.269517	9.09148e-35						Rock2	0.684685	5.4899e-27
Arhgef3	0.646496	3.697e-102		Antxr2	0.488436	2.72986e-05						Rpl28	0.742628	5.0223e-129						Pan3	0.732469	2.13816e-54		Abhd6	0.592476	2.96552e-65						Lad1	0.353648	1.02136e-34						Kctd1	0.520371	6.49937e-27
Kcnh1	0.424692	6.8029e-102		2700097O09Rik	0.602013	2.76737e-05						Tfap2c	0.401092	7.35404e-129						Arhgap12	0.766491	2.146e-54		Prdm1	0.933723	4.17475e-65						Ppp1r14c	0.518953	1.87776e-34						Pard6g	0.582186	6.92947e-27
Rif1	0.445285	1.40848e-101		Igsf8	0.691284	2.83469e-05						Cyb561	0.30238	8.17779e-129						Lemd3	0.833655	2.48792e-54		Iffo2	0.852524	6.40765e-65						Nhsl1	0.714034	2.04657e-34						Clpx	0.615464	7.77535e-27
Aggf1	0.455861	2.85073e-101		Ext1	1.05585	2.99447e-05						Rps19	0.726697	1.15591e-128						Nckap5	0.882459	3.88571e-54		Lratd1	0.57795	9.45443e-65						Map1lc3a	0.600414	4.73056e-34						Pan3	0.721112	8.52666e-27
Smg7	0.69179	3.20495e-101		Tfap2a	0.515742	3.06964e-05						Dynlt3	0.709353	1.1671e-128						Tnks2	0.741183	4.82849e-54		Adgrl2	1.17915	2.39197e-63						Lmbrd2	0.552014	5.60644e-34						Lamb3	0.439114	1.24917e-26
Ect2	0.457821	3.22475e-101		Snx24	0.490946	3.07168e-05						Dab1	0.262955	2.84216e-128						Wdr43	0.756609	4.91516e-54		Ggh	1.06628	2.50041e-63						Exph5	0.352572	6.14825e-34						Adk	0.739448	1.37064e-26
Qser1	0.401444	3.2813e-101		Olfm2	0.609718	3.62292e-05						Ppp1r14c	0.650027	3.26784e-128						Chl1	0.629882	6.00091e-54		Itm2b	0.800513	2.52242e-63						Pon2	0.639715	7.34231e-34						Smc4	0.74777	1.37624e-26
Rpsa	0.634529	4.15184e-101		Tmem158	0.28847	3.64049e-05						Adh7	0.283078	4.2832e-128						Mpzl3	0.779546	6.77189e-54		Sptbn2	0.615859	3.90911e-63						Bmpr1a	0.625844	1.40518e-33						Ube2g1	0.710423	1.41075e-26
Polr3g	0.268459	7.06572e-101		Uba2	0.629658	3.85496e-05						Ripk4	0.418368	6.33769e-128						Tbl1x	0.791271	1.86427e-53		Jup	0.989757	1.28587e-62						Dlg2	0.525519	1.4889e-33						Ssbp3	0.611661	1.44204e-26
Rps27	0.627172	7.21107e-101		Btrc	0.49917	3.91635e-05						1110008P14Rik	0.529809	9.84187e-128						Ube2e2	0.835693	3.4206e-53		Scel	0.968995	2.2803e-62						Rpl23a	0.643128	1.6143e-33						Rps6kb1	0.606064	2.00108e-26
Rpl19	0.631764	1.85374e-100		Robo2	0.521831	4.22295e-05						Gsdma	0.275383	1.11053e-127						Ncoa2	0.757921	3.57383e-53		Zdhhc21	0.87752	5.41128e-62						Slc25a13	0.367475	2.20515e-33						Maml3	0.603657	2.65862e-26
Bcl2l13	0.388418	2.04923e-100		Pdia4	0.734885	4.53084e-05						Tns4	0.470024	1.98e-127						Clca3a2	0.875113	3.61404e-53		Fhdc1	0.392926	8.2312e-62						Tmem79	0.315152	2.26879e-33						Esyt2	0.652888	3.32187e-26
Amd1	0.36819	2.27677e-100		Dlg5	0.430791	4.5692e-05						Ifi202b	0.87853	2.77467e-127						Mark2	0.756317	3.97959e-53		Tec	0.912318	1.65696e-61						1110008P14Rik	0.547298	2.5711e-33						Serpinb5	0.485254	3.43849e-26
Pxdc1	0.640486	3.76e-100		Dnmt3a	0.628775	4.74949e-05						Ptpn13	0.81027	2.98516e-127						Socs6	0.550026	7.29179e-53		Zfp706	0.968932	2.23387e-61						Eml4	0.701331	3.28046e-33						Oxct1	0.616883	3.60025e-26
Emp2	0.592695	1.40507e-99		Pkp3	0.746549	4.80273e-05						Rhov	0.381655	5.22368e-127						Tfap2c	0.502566	1.00839e-52		Pinlyp	0.290766	1.21632e-60						Ptpn3	0.549254	3.30218e-33						Bclaf1	0.627144	3.67724e-26
Ago4	0.271417	1.49846e-99		Ubash3b	0.69517	5.26143e-05						Ttk	0.253589	8.20907e-127						Cramp1l	0.760895	1.07826e-52		Rhod	0.508615	1.25979e-60						Hspb8	0.413389	3.82047e-33						Gpsm2	0.454482	4.76893e-26
Tacstd2	0.636644	2.16196e-99		Ldha	0.957122	5.61681e-05						Hr	0.392227	6.9242e-126						Srsf11	0.681024	2.83413e-52		Bnipl	0.262376	1.81038e-60						Myo6	0.555946	5.11677e-33						Tenm3	0.569005	5.0248e-26
Tmem87a	0.520879	2.81701e-99		Twf1	0.748938	5.97686e-05						Hadh	0.466793	1.0374e-125						Gm48678	0.674328	5.14269e-52		Kctd5	0.613725	2.95656e-60						Foxk1	0.416153	8.17355e-33						Tra2b	0.66867	5.28111e-26
Zbtb16	0.384436	3.0329e-99		Snrk	0.719543	6.61344e-05						Wdr61	0.646192	1.08868e-125						Ktn1	0.699077	5.31268e-52		Esrp1	0.832503	4.31596e-60						Akirin1	0.688907	8.57446e-33						Jag1	0.768767	6.30482e-26
Arhgef11	0.633094	5.53628e-99		Itga5	0.716671	6.76219e-05						Cobl	0.349531	3.81435e-125						Eps8l2	0.496576	6.99197e-52		Rhbdl3	0.365164	4.79117e-60						Dmkn	0.593038	8.94368e-33						Farp1	0.743896	6.70182e-26
2610528A11Rik	0.526791	5.80271e-99		Rassf5	0.413692	6.87164e-05						Rpl18	0.709631	9.4376e-125						Lnpk	0.586268	7.53147e-52		Tspan5	1.01532	6.54718e-60						Ptp4a2	0.706268	9.14317e-33						Atad2b	0.716331	6.94495e-26
Mcm4	0.262046	1.08112e-98		Plxnb1	0.275198	7.23622e-05						Pkib	0.543945	1.10173e-124						Slc25a48	0.409352	1.16088e-51		N4bp3	0.281818	8.18428e-60						Atad2b	0.659466	1.01108e-32						Smyd3	0.794898	7.27641e-26
Pex14	0.550567	1.32666e-98		Krt17	0.681008	8.44201e-05						Rpl3	0.744883	1.93662e-124						1600010M07Rik	0.635349	1.43441e-51		Rora	0.764178	9.85638e-60						Ctnnd1	0.671212	1.04303e-32						Strbp	0.656213	8.55682e-26
Rpl27a	0.601854	1.90799e-98		Akr1b8	0.621843	9.04927e-05						Dennd2c	0.759488	1.96589e-124						Clasp1	1.03843	1.58586e-51		Amotl2	0.621784	2.4474e-59						Cebpa	0.423716	1.08793e-32						Epb41l4a	0.61319	8.75646e-26
Rpl8	0.634647	2.26273e-98		Cyb5b	0.651411	9.60678e-05						Rpl4	0.763966	2.35604e-124						Usp53	0.62446	1.67362e-51		2200002D01Rik	0.495104	3.5602e-59						Maoa	0.61723	1.64764e-32						Ranbp9	0.797597	9.1854e-26
Rpl14	0.657996	5.77551e-98		Pak6	0.395336	9.828e-05						Rpl6	0.702	4.80703e-124						Hnrnpc	0.717363	2.21708e-51		Slc19a2	0.304705	5.76973e-59						Usp6nl	0.633311	1.79864e-32						Xpo7	0.699218	9.75766e-26
Smg1	0.759682	5.79894e-98		Ext2	0.548696	0.000110168						Efna5	0.89112	5.09284e-124						Cpsf6	0.754177	2.72906e-51		Ly6d	0.950038	6.19641e-58						Trp63	0.494463	2.18422e-32						Bach2	0.743964	1.03422e-25
Rpl18	0.652372	6.52149e-98		Vegfa	0.770759	0.000111557						Rpl29	0.742122	9.67607e-124						Shroom2	0.550264	3.25682e-51		Lypd6b	0.799088	1.11861e-57						Arhgap5	0.559032	2.19501e-32						Crebbp	0.611054	1.11873e-25
Ap1ar	0.35227	9.69055e-98		Tpx2	0.465431	0.000121609						Ano1	0.315546	1.55925e-123						Akirin1	0.726865	7.41769e-51		Sorbs1	0.724027	1.27662e-57						Cbr3	0.325545	2.41825e-32						Nop58	0.614814	1.12846e-25
Taf15	0.690712	1.15472e-97		Fam83f	0.471917	0.00012753						Lypd6b	0.632665	2.67822e-123						Acvr1	0.752901	7.84187e-51		Usp54	0.346514	1.50492e-57						Lsr	0.377315	2.87513e-32						Sfrp1	0.779	1.36382e-25
Idh3a	0.275505	1.29885e-97		Pcbp3	0.618462	0.000150229						Msmo1	0.61543	7.55026e-123						Ythdc1	0.776441	8.41446e-51		Dynll1	1.1076	1.68708e-57						Arhgap44	0.448734	3.68163e-32						Mical2	0.665466	1.37708e-25
Sult5a1	0.470772	1.65146e-97		Taok2	0.484177	0.000160311						Tubb4b	0.845623	7.69345e-123						Polb	0.707914	1.4786e-50		Egr2	0.596476	3.59021e-57						Ppp1r13l	0.37257	3.76099e-32						Itgb8	0.413155	1.53432e-25
Vps13a	0.538348	1.82079e-97		Lrp5	0.495431	0.000160913						Uchl3	0.476205	7.83947e-123						Rapgefl1	0.528772	2.34387e-50		Trpv3	0.401894	1.12629e-56						Efna5	0.576902	3.77856e-32						Setd5	0.618087	1.79586e-25
Ddx46	0.49581	2.36951e-97		Tuba4a	0.688396	0.000162744						Cpeb2	0.858583	1.38509e-122						Col4a3bp	0.729286	2.61341e-50		Gsn	1.03166	1.2227e-56						Nckap1	0.610255	4.1988e-32						Nfia	0.678707	1.81235e-25
Gas5	0.733042	3.0982e-97		Hes1	0.539422	0.000163176						Idi1	0.525007	2.60762e-122						Ybx3	0.597684	2.62244e-50		Sqle	0.749464	2.1003e-56						Selenoi	0.553949	4.21679e-32						Wdr43	0.600973	1.8646e-25
Pou2f3	0.359151	3.20827e-97		Fam83h	0.386979	0.000188182						Rps6	0.704231	3.101e-122						Ric1	0.788816	3.32513e-50		AI661453	0.469594	2.40491e-56						Gtf2ird1	0.456396	4.46437e-32						Csnk1a1	0.53213	2.38355e-25
Trim29	0.50125	4.28875e-97		Dag1	0.591829	0.00019953						Rhbdl2	0.294951	3.80017e-122						Nup153	0.734417	4.25866e-50		Prnp	0.810915	5.36683e-56						Prom2	0.370712	5.95824e-32						St5	0.70712	3.30621e-25
Limd1	0.667322	5.1076e-97		Gpc4	0.413469	0.00020329						Rpl21	0.700862	3.83334e-122						Ube2h	0.705764	5.37023e-50		Clec2g	0.493956	5.68729e-56						Macf1	0.768481	7.60522e-32						Nmt2	0.664185	4.74643e-25
Ddr1	0.320745	6.15724e-97		Tfap2c	0.633442	0.000208232						Cep170b	0.406202	7.08661e-122						Ubxn7	0.736972	6.04764e-50		Rmnd5a	1.00088	7.50092e-56						Ptgr1	0.363483	9.81046e-32						Rai1	0.590507	5.62137e-25
Rps3	0.649241	8.87948e-97		Scmh1	0.627847	0.000209111						BC016579	0.285272	1.15429e-121						Pon2	0.809133	6.24769e-50		Il34	0.574683	8.64994e-56						Slc5a1	0.52798	1.07372e-31						Zzz3	0.583787	6.19082e-25
Npm3	0.297416	9.04152e-97		Elk3	0.64792	0.00021997						Rpl23	0.625955	1.52805e-121						Usp6nl	0.846612	6.49051e-50		Klf3	0.782976	1.06823e-55						Rnf43	0.286331	1.18842e-31						Rad51b	0.823934	6.84946e-25
Mid2	0.436412	1.64301e-96		Arhgap32	0.65586	0.000221104						Fasn	0.378582	2.62739e-121						Ccdc6	0.677132	1.095e-49		Itpr3	0.83527	1.17224e-55						Nipal2	0.544722	1.23935e-31						Yes1	0.651289	6.87735e-25
Anxa8	0.540549	1.79978e-96		Impa2	0.311539	0.000234585						Ppp1r13l	0.356835	4.56816e-121						5330438D12Rik	0.513631	1.87372e-49		Megf9	0.818012	1.98131e-55						Ddi2	0.614765	1.26059e-31						Ubxn7	0.567447	7.1748e-25
Cd109	0.545179	2.11133e-96		Tcim	0.685975	0.00023618						Kif21a	0.669689	4.71496e-121						Pkp1	0.552598	2.20577e-49		Gdpd1	0.524566	3.311e-55						Ezr	0.555345	2.49874e-31						Larp4	0.652891	8.10885e-25
Rps15a	0.661813	4.04216e-96		Rnf145	0.623187	0.000237284						Gpr160	0.337005	1.45727e-120						Dcaf1	0.620821	3.26254e-49		Sh3gl2	0.368504	3.42705e-55						Iffo2	0.570385	3.88824e-31						Tmtc2	0.630504	8.35e-25
Rpl36	0.657481	6.02853e-96		Actb	0.709275	0.000251764						Cd109	0.695652	7.74427e-120						Trim33	0.723308	3.98706e-49		Cds1	0.802884	3.91032e-55						Dstn	0.543523	4.93255e-31						Zfp704	0.564781	1.1449e-24
Dcbld1	0.363844	7.13783e-96		Oaf	0.620661	0.000257672						Mfsd6	0.523723	8.52531e-120						Klhl7	0.694501	4.51249e-49		Ovol1	0.629524	3.98963e-55						Klf5	0.553398	6.58627e-31						Rbbp8	0.962911	1.21341e-24
Nckap1	0.622331	8.27721e-96		Pfkp	0.848018	0.000269683						Hmgcs1	0.736876	2.9901e-119						Fhit	0.840581	9.07926e-49		Wwtr1	0.748319	6.29165e-55						Dnase1l3	0.41127	6.85611e-31						1600010M07Rik	0.545167	1.2595e-24
Map2k4	0.78592	1.33748e-95		Lrp6	0.915903	0.000280141						Epha2	0.396016	7.24661e-119						Xrn2	0.779363	1.15256e-48		Plaat3	0.466499	8.64982e-55						Ankrd35	0.3209	6.96438e-31						Pex14	0.666143	1.33357e-24
Mindy3	0.739591	1.38922e-95		Capn2	0.739543	0.000300317						Rpl9	0.695878	2.66978e-118						Lmbrd2	0.657716	2.23371e-48		Lrrc28	0.702423	9.83716e-54						Pik3cb	0.640862	9.67023e-31						Cblb	0.691894	1.49597e-24
Rnf152	0.306055	1.63827e-95		Hivep2	1.12768	0.000300631						Rpl32	0.753703	5.57568e-118						Dennd4c	0.764345	2.33051e-48		Rps6kb2	0.32627	1.58394e-53						Elovl4	0.688404	9.90116e-31						Nsd2	0.653572	1.55643e-24
Snhg4	0.255066	1.77192e-95		Orai2	0.356881	0.000302023						Fgfbp1	0.604778	1.17076e-117						Pias1	0.669877	2.37278e-48		Prxl2b	0.750932	1.6043e-53						Cds1	0.471717	1.18395e-30						Rps6ka1	0.344371	1.75859e-24
Rp9	0.469606	2.86156e-95		Epm2aip1	0.377178	0.000306067						Tfap2a	0.458482	2.92629e-117						Nipa2	0.641354	2.62044e-48		Bnip3l	1.05639	4.19519e-53						Rab3d	0.437916	1.73874e-30						Mon2	0.659622	1.84758e-24
Tnfrsf12a	0.430181	6.71432e-95		Myo5a	0.660466	0.000307405						Cwh43	0.311279	5.47682e-117						Rere	0.731795	2.72167e-48		Itpkc	0.859265	5.34091e-53						Sh3bgrl2	0.38771	2.13663e-30						Adcy9	0.562077	2.20502e-24
Topbp1	0.313733	2.00693e-94		Sesn2	0.653823	0.000308048						Desi1	0.493152	1.75216e-116						Tmem245	0.640135	2.80866e-48		Fdft1	0.677032	7.35016e-53						Cask	0.86213	2.31218e-30						Frmd4b	0.715465	3.07486e-24
Nudt5	0.351614	2.3784e-94		Mbnl2	0.572005	0.000310569						Dbi	0.824928	3.15861e-116						Rras2	0.734876	2.88348e-48		Ap1s3	0.391199	4.18916e-52						Adgrg1	0.354398	3.29934e-30						Inpp4b	0.435528	3.22997e-24
Gpc4	0.378748	3.52689e-94		Mphosph6	0.365975	0.000339727						Serbp1	0.709556	4.97266e-116						Dsg1a	0.676852	3.06374e-48		Abtb2	0.957612	5.40179e-52						Rangap1	0.491027	6.45212e-30						Cbfa2t2	0.56388	3.711e-24
Ddx27	0.263324	3.91289e-94		Calu	0.83103	0.000347216						Rps13	0.67659	5.32753e-116						Reps1	0.705885	4.46807e-48		Sort1	0.400374	1.17819e-51						Oas1f	0.438037	6.95494e-30						Tfdp2	0.485355	4.60776e-24
Snhg12	0.373479	4.0607e-94		Polr2d	0.304641	0.000380514						Acsbg1	0.331786	7.71098e-116						Usp34	0.665416	4.79808e-48		S100a14	0.7415	2.30843e-51						Slc39a11	0.547393	1.32833e-29						Arid4b	0.68794	5.10365e-24
Ptcd3	0.251882	4.73736e-94		Tbc1d2	0.464675	0.000382534						Wwc1	0.513237	2.47997e-115						Rab22a	0.684252	4.97616e-48		Crabp2	0.576975	2.55143e-51						Ranbp9	0.631759	1.33468e-29						Plcg2	0.586187	5.67929e-24
Pkp1	0.50937	6.36983e-94		Mapk6	0.821913	0.000398579						Ikzf2	0.487051	3.84329e-115						Top2b	0.652943	5.50189e-48		Map3k8	0.834644	6.24992e-51						Lnpk	0.425264	1.40045e-29						Eps8l2	0.521678	5.88698e-24
Fat1	0.406866	6.56979e-94		Kif11	0.484344	0.000409005						Rps11	0.681804	4.72744e-115						Ppl	0.534259	5.99884e-48		Cpeb2	0.909654	8.81995e-51						Myo1e	0.637636	1.47694e-29						Hivep2	0.690528	6.9748e-24
Rab38	0.355695	1.49407e-93		Ptprk	0.488594	0.000416						Acad11	0.266819	6.63437e-115						Osbpl3	0.727501	7.50333e-48		Slc1a1	0.674899	1.97899e-50						Nxt1	0.352138	1.67007e-29						Vangl1	0.508085	7.36691e-24
Paics	0.291804	1.63373e-93		Slc7a1	0.513158	0.000444074						Epb41l5	0.406461	8.65343e-115						Sh3rf2	0.56821	8.99892e-48		Pdlim2	0.527067	2.25334e-50						Pgap1	0.491037	1.71039e-29						Nfatc1	0.762376	8.08142e-24
Wdr43	0.532402	1.83599e-93		Irx5	0.577083	0.00045599						Stard4	0.354896	1.14139e-114						Lamc2	0.736854	1.42586e-47		Epha1	0.29848	2.46529e-50						Slmap	0.693384	1.77777e-29						2610035D17Rik	0.695268	8.37362e-24
Srpk2	0.681996	2.18557e-93		Ppp2r3a	0.76609	0.000470814						Map1lc3a	0.702196	2.624e-114						mt-Nd5	0.606305	1.42804e-47		Lgals7	0.972019	2.65085e-50						Rbp2	0.37688	2.13549e-29						Dhx15	0.5998	8.64202e-24
Trerf1	0.475793	2.27593e-93		Gjb3	0.408498	0.000489354						Sar1b	0.712453	3.26826e-114						Sar1b	0.876845	1.66492e-47		Alox12e	0.62611	3.51261e-50						Naa25	0.468509	2.40857e-29						Tsc22d2	0.605197	8.81059e-24
Nop58	0.477565	2.34798e-93		Ppard	0.773258	0.000504646						Rpl17	0.660611	5.23055e-114						Cpeb3	0.743486	1.7071e-47		Akirin1	0.83114	4.85996e-50						Cobl	0.298387	3.17681e-29						Tead1	0.676878	8.8206e-24
Ehf	0.475334	2.43798e-93		Csnk1a1	0.564509	0.000505493						Pon2	0.719371	1.18807e-113						Ubap2	0.690925	1.71168e-47		Crybg2	0.336648	5.73127e-50						Inhbb	0.272457	3.24579e-29						Fbxl17	0.694755	1.01029e-23
Erbb3	0.295305	3.73341e-93		Rrm2	0.607033	0.000514583						Mid2	0.502221	1.65406e-113						Wasl	0.720126	1.79683e-47		Fam83g	0.546308	7.81065e-50						Frat2	0.256512	3.57252e-29						Larp1	0.611114	1.31964e-23
Ptpn14	0.428193	7.59987e-93		Robo1	0.567417	0.000569385						Sc5d	0.401009	1.83078e-113						Btbd7	0.673078	1.92726e-47		Epha4	0.812724	8.07675e-50						Acsbg1	0.366211	3.86608e-29						Ltbp1	0.572509	1.33307e-23
Scap	0.340163	1.24507e-92		Myo19	0.286031	0.000585537						Gm2164	0.308222	4.88609e-113						Prrg4	0.570847	2.29154e-47		Hmgcs1	0.844519	8.25873e-50						Prkci	0.439786	4.32379e-29						Fam83b	0.53988	1.54369e-23
Egfr	0.799128	1.3476e-92		Limk2	0.434625	0.000607848						Map7	0.616669	7.96415e-113						Sh3rf1	0.779786	2.38329e-47		Tead3	0.414857	1.1266e-49						Pkp3	0.424456	5.16595e-29						Nckap1	0.616432	1.80803e-23
Rps9	0.559504	2.62091e-92		Gm26532	0.465109	0.000611436						Naa25	0.581051	2.20791e-112						Usp25	0.677907	2.58211e-47		Ablim1	0.816694	1.52045e-49						mt-Co1	0.478368	7.1267e-29						Erbin	0.630601	2.11425e-23
Clasp2	0.699489	5.33336e-92		Acvr1	0.946284	0.000632703						Acpp	0.505525	2.59079e-112						Gspt1	0.642287	2.60366e-47		Gstm5	0.505512	1.93945e-49						Gskip	0.405628	7.58778e-29						Ube2q2	0.636197	2.32847e-23
Rack1	0.625826	6.35002e-92		Wwox	0.793452	0.000635997						Rpl19	0.638793	1.54778e-111						Acaca	0.745395	2.60948e-47		Spsb3	0.441531	2.78491e-49						F2rl1	0.404809	8.34792e-29						Cul1	0.621629	2.63824e-23
Golim4	0.426501	1.46589e-91		Ctnnd1	0.67569	0.000650438						Nhsl1	0.678059	1.77581e-111						Riok1	0.629435	3.39343e-47		Spint1	0.374394	5.08978e-49						Stap2	0.293034	1.0325e-28						Fam120a	0.555284	2.65522e-23
Dhx9	0.631395	1.89479e-91		Gm2164	0.38965	0.000661267						Nlrc5	0.600603	2.23326e-111						Gm35188	0.354851	3.65479e-47		Blzf1	0.431095	9.53011e-49						Yes1	0.521953	1.08633e-28						Nxn	0.825628	2.9522e-23
Taf3	0.415373	2.33301e-91		Pqlc3	0.488305	0.000673302						Ddr2	0.717862	2.34232e-111						Nsd3	0.633361	4.40733e-47		Fosl1	0.706257	1.01396e-48						Calm4	0.901233	1.0949e-28						Adamts1	0.923994	3.06062e-23
Rpl9	0.593002	2.99664e-91		1700025G04Rik	0.860698	0.000691507						Rpl37	0.612409	2.83302e-111						Arhgef12	0.619792	5.18095e-47		Dlg2	0.972374	1.04921e-48						Larp1b	0.424127	1.1866e-28						Zfp148	0.701067	3.27744e-23
Cobll1	0.48589	3.02239e-91		Zfp507	0.307169	0.000708117						Slc12a2	0.591174	4.02115e-111						Arl15	0.777635	7.52424e-47		Gabarapl2	1.13318	1.29152e-48						Mark2	0.575508	1.26198e-28						Cse1l	0.615439	3.60563e-23
Il17rc	0.283382	4.03931e-91		Pard3	0.684114	0.000710501						Pgrmc2	0.546775	5.76593e-111						Eda	0.868589	9.62609e-47		Dnaja4	0.426989	1.37893e-48						Etl4	0.535463	1.85878e-28						Rictor	0.689686	3.66314e-23
Ctnna1	0.682704	4.11021e-91		Ckap5	0.728489	0.000721458						Bicdl1	0.266845	6.99847e-111						Gm37240	0.592746	1.054e-46		Slc6a8	0.63171	1.84117e-48						Zfp326	0.542076	2.02596e-28						Ubn2	0.647029	4.03598e-23
Rpl37	0.563952	1.66632e-90		Heatr5b	0.376373	0.00079268						Ddr1	0.367919	7.03278e-111						Ppif	0.558109	2.04704e-46		Plekhn1	0.570308	2.6328e-48						Chit1	0.483021	2.35511e-28						Rif1	0.565323	4.39982e-23
Btbd3	0.346794	1.74714e-90		Lpp	0.691296	0.000796381						Sh3d19	0.709584	1.10924e-110						Wapl	0.642825	2.58669e-46		Ptgr1	0.521644	2.63448e-48						Fam234a	0.498806	2.64651e-28						Fbxo11	0.585395	5.71078e-23
Npm1	0.631928	2.45652e-90		Ppp3ca	0.781846	0.000852433						Arap2	0.621069	1.22532e-110						Adam10	0.851599	4.5205e-46		Nlrc5	0.692409	3.66587e-48						Serinc2	0.366191	2.82879e-28						Lncppara	0.425357	6.57975e-23
Celsr2	0.260361	2.72791e-90		Pdlim1	0.637961	0.000873505						Serpinb2	1.16826	1.35127e-110						Atg13	0.639672	4.68149e-46		Dusp22	0.622604	5.82028e-48						Aldh3a2	0.317745	3.63018e-28						Cxcl14	0.939297	7.00392e-23
Sema3f	0.262331	3.85016e-90		Pls3	0.682106	0.000926797						Ctnnd1	0.729428	1.9494e-110						Plxdc2	0.964357	7.15112e-46		Aqp9	0.368008	7.27119e-48						Ptgs1	0.523875	3.791e-28						Itga2	0.679253	7.02952e-23
Diaph3	0.619005	3.87199e-90		Hjurp	0.488913	0.000950136						Blmh	0.597826	3.46046e-110						Zfp326	0.790049	1.09492e-45		Ift20	0.735507	7.5066e-48						Gstm1	0.501856	5.6532e-28						Camta1	0.623713	7.92231e-23
Pnn	0.507175	6.25036e-90		Spidr	0.687241	0.00097059						Rps15a	0.673157	9.86622e-110						Ppp1r12a	0.735641	1.158e-45		Rab38	0.726659	2.74542e-47						Rnd3	0.455179	6.0144e-28						Clasp2	0.646562	8.13575e-23
Rplp1	0.551215	8.0063e-90		Cd44	0.631516	0.000992701						Slc25a48	0.30374	1.06329e-109						Taf3	0.615763	1.16034e-45		Guk1	0.62887	2.99652e-47						Sppl3	0.666757	6.56239e-28						Cnst	0.410728	8.1865e-23
Fam135a	0.433861	2.21792e-89		Pgam1	0.798982	0.00106612						Kctd15	0.250874	1.62863e-109						Mef2a	0.727854	1.19948e-45		Inava	0.333504	3.9163e-47						Pdcd4	0.495955	6.88103e-28						Smo	0.430985	8.38524e-23
Sae1	0.376578	2.44728e-89		Iars2	0.52399	0.00112522						Anxa1	0.662024	2.33057e-109						Adgrg6	0.632823	1.59589e-45		Rasgrp1	0.255749	4.42785e-47						Senp2	0.618537	7.01196e-28						Cpsf6	0.630321	8.72016e-23
Epha4	0.591145	6.18846e-89		Pja1	0.508448	0.00120816						Eif1ad	0.378588	2.36733e-109						Metap1	0.601263	1.76781e-45		Sytl1	0.370576	5.045e-47						Mcc	0.600976	7.21542e-28						Setd2	0.580832	1.24797e-22
Isoc1	0.252933	7.07957e-89		Rab31	0.612423	0.00120866						Rpl26	0.630915	2.45324e-109						Mcmbp	0.602309	1.88428e-45		Sec62	0.870854	5.14009e-47						Egfr	0.50319	8.79386e-28						Sltm	0.603714	1.49702e-22
Car13	0.406003	7.24764e-89		Ckmt1	0.569554	0.00130677						Bicd2	0.63056	3.87599e-109						mt-Nd3	0.528747	1.89018e-45		Avpi1	0.850256	8.66334e-47						Nfatc1	0.467118	9.04878e-28						Zfyve9	0.558606	1.74831e-22
Cblb	0.727477	1.42348e-88		Efna5	0.942823	0.00132679						Kif13b	0.788886	4.2466e-109						Arid1b	0.670049	2.59651e-45		Kif21a	0.677331	9.02402e-47						Zfyve9	0.575317	9.29006e-28						Fubp1	0.596837	1.78375e-22
Rbbp8	0.677592	1.65152e-88		Nhsl1	0.696109	0.00135248						Osbpl5	0.370644	4.31841e-109						Clca2	0.492191	3.3638e-45		Dpp3	0.507215	3.1328e-46						Papss1	0.505635	1.0174e-27						Otud4	0.567266	2.03115e-22
Rps23	0.565787	4.30849e-88		Vangl1	0.309803	0.00135713						F2rl1	0.309187	6.32104e-109						Faf1	0.70106	6.63807e-45		Idi1	0.679729	4.79573e-46						Sh3rf2	0.451979	1.1264e-27						Numa1	0.495133	2.08657e-22
Rpl23	0.546231	4.42276e-88		Plekha2	0.383286	0.00137854						Uba52	0.678596	6.52981e-109						Eppk1	0.687151	8.39074e-45		Cep170b	0.476769	4.87937e-46						Arl4a	0.572025	1.24545e-27						Glce	0.442844	2.0977e-22
Gm2164	0.301453	6.05383e-88		Extl3	0.497351	0.00137959						Bod1	0.339218	1.03084e-108						Mtmr10	0.649191	8.55892e-45		Smagp	0.568326	1.00001e-45						Fam102a	0.320499	1.26916e-27						Dhx9	0.597219	2.34052e-22
Ezh2	0.480213	7.29845e-88		Serpinb6a	0.623821	0.00138266						Rpl7	0.632624	1.35803e-108						Itpr3	0.55	1.02243e-44		Hmgcr	0.653282	2.00711e-45						Tmprss13	0.293261	1.27363e-27						Atxn2	0.649783	2.46551e-22
Adk	0.490186	9.48229e-88		Inava	0.385562	0.00143495						Arhgef10l	0.602213	2.02387e-108						Cul3	0.66074	1.03997e-44		Zfyve9	0.697091	3.20628e-45						Aig1	0.451002	1.51002e-27						Ctdspl2	0.552556	2.50639e-22
Rpl36a	0.598632	1.05501e-87		Mpzl2	0.498815	0.0014553						Plxdc2	0.715501	9.32986e-108						Brwd1	0.700827	1.6802e-44		Mvd	0.279754	3.40835e-45						Hras	0.545141	1.57177e-27						Ktn1	0.533272	2.63179e-22
Tle4	0.719087	1.13831e-87		Sec22a	0.438181	0.00149542						St14	0.38251	1.87947e-107						Prc1	0.516001	2.75826e-44		Snrnp25	0.29397	4.39648e-45						Etfdh	0.338391	2.22301e-27						Arhgap5	0.537081	2.79516e-22
Enah	0.552969	1.32913e-87		Src	0.449559	0.00155351						Micos13	0.633576	2.25052e-107						Mrtfa	0.644787	2.93026e-44		Rab25	0.712189	8.05116e-45						Desi1	0.397088	2.39756e-27						Tns3	0.559341	3.03421e-22
Eed	0.367612	1.37172e-87		F3	1.07143	0.00164978						Slc24a3	0.670627	2.45663e-107						Tns4	0.534613	3.48821e-44		Slc10a6	0.459474	1.04611e-44						Pard3	0.633528	2.88137e-27						Apoe	0.438926	3.46291e-22
Cachd1	0.490023	1.58564e-87		Prdm1	0.786911	0.00169824						Zdhhc21	0.601177	3.27554e-107						Stat3	0.6856	3.68449e-44		Barx2	0.387224	1.108e-44						Arhgap21	0.658016	3.06543e-27						Alcam	0.314574	4.88425e-22
Suclg2	0.277853	2.20869e-87		Diaph3	0.713242	0.00171561						Nsun2	0.450662	5.06803e-107						Plekha5	0.845785	3.92283e-44		Cyp2j6	0.407656	2.77275e-44						Slco3a1	0.655803	3.11572e-27						Ipo7	0.66199	5.82381e-22
Rps11	0.605482	2.54948e-87		Map4	0.682213	0.00172627						Clcn3	0.576262	3.4085e-106						Sema3d	0.646105	3.9282e-44		Sprr1b	1.47617	2.8941e-44						Ipmk	0.51469	3.39934e-27						Shroom3	0.546053	6.01724e-22
Naa15	0.5879	2.69929e-87		Scaper	0.596765	0.00175331						Zfp385a	0.346883	6.39947e-106						Med13	0.647355	4.31472e-44		Sec11c	0.701879	4.03923e-44						Them5	0.368895	4.00179e-27						Pkn2	0.5859	6.10109e-22
Mybbp1a	0.303269	7.36043e-87		Fam49b	0.666898	0.00176523						Rpl22	0.635091	7.09513e-106						Atg3	0.801457	4.36685e-44		Cebpa	0.571304	4.16574e-44						Rab40c	0.474317	4.22511e-27						Lrba	0.645983	6.11126e-22
Ppp1r14b	0.51271	8.81451e-87		Ube2c	0.807283	0.00188498						Rps3	0.685677	8.56166e-106						Ptpn4	0.684749	8.32816e-44		Slc25a25	0.72923	4.26684e-44						Vangl2	0.305484	4.30408e-27						Sgk1	0.603138	6.2137e-22
Clec2g	0.275775	9.81492e-87		S100a14	0.621975	0.00199638						Cds1	0.537804	2.289e-105						Gm47283	0.718309	9.92511e-44		Zfp750	0.408763	9.42529e-44						Pde12	0.289609	4.31297e-27						Ash1l	0.660412	6.83489e-22
St5	0.478039	1.12935e-86		Procr	0.449172	0.00214004						Rpl18a	0.626478	1.10913e-104						Piga	0.438135	1.03068e-43		Prrg2	0.471146	9.51903e-44						Nfe2l1	0.577727	4.49845e-27						Tmem131l	0.648614	8.02465e-22
Ankrd11	0.639381	1.34593e-86		Inhba	0.360687	0.00232579						Tmem159	0.323857	7.8503e-104						Atf6	0.65396	1.28976e-43		Egfr	0.810946	1.39468e-43						Ano1	0.319434	6.46944e-27						Mbd2	0.578838	9.40309e-22
Rrm1	0.420192	1.69047e-86		Snx14	0.426395	0.00232718						Slc22a23	0.5242	9.12121e-104						Ascc3	0.665472	1.93982e-43		Crb3	0.298726	2.16507e-43						Cd2ap	0.533084	7.1213e-27						Clstn1	0.558656	1.08186e-21
Nasp	0.519939	1.73065e-86		Nvl	0.435395	0.00240529						Slc6a14	0.624594	1.0339e-103						Pds5a	0.681719	2.01714e-43		Tsc22d2	0.852523	2.31146e-43						Ide	0.442507	8.25005e-27						Vcl	0.678687	1.09475e-21
Nrg1	0.655549	1.76741e-86		Pbx1	0.554139	0.00242057						Mcur1	0.291074	3.08901e-103						Tanc1	0.649823	2.02232e-43		Mindy3	0.830861	3.70647e-43						Erlin1	0.383956	9.89653e-27						Uri1	0.505381	1.11942e-21
Tcerg1	0.540054	2.21009e-86		Mid2	0.396373	0.0024615						Ldlr	0.71243	6.98353e-103						Phlpp1	0.607743	2.84419e-43		Klhl18	0.428002	6.24079e-43						Grpel2	0.303603	9.97526e-27						Larp1b	0.694496	1.25407e-21
Pcnx	0.707047	2.61095e-86		Krt6b	0.254866	0.00255578						Tpt1	0.515683	7.43761e-103						Zbtb11	0.674975	3.23236e-43		Nhsl1	0.899981	6.37517e-43						Lgalsl	0.399496	1.01491e-26						Pik3cb	0.688285	1.38229e-21
Smc3	0.437023	3.46742e-86		Mb21d2	0.672688	0.00256445						Pard6g	0.439094	1.54042e-102						Sec24a	0.799402	3.82205e-43		Plekha5	0.83158	1.68481e-42						Acox1	0.483699	1.26633e-26						Diaph3	0.689908	1.43965e-21
Mcm6	0.254536	3.68669e-86		Chd9	0.667816	0.00262629						Sesn2	0.464474	2.02185e-102						Usp15	0.608528	4.59873e-43		Clip4	0.641267	2.09905e-42						Abcd3	0.538951	1.60311e-26						Hnrnpc	0.56914	1.71173e-21
Il13ra1	0.676197	3.90898e-86		Ints6	0.712648	0.00268186						Ghr	0.597531	2.046e-102						Kif5b	0.606699	4.81711e-43		Dedd2	0.470635	3.08021e-42						Kremen1	0.466071	1.70508e-26						Zfp280d	0.595044	1.74738e-21
Ldlr	0.639471	8.4628e-86		Sox9	0.530963	0.00269496						Rps23	0.607111	8.22294e-102						Cwh43	0.419572	5.36876e-43		Map7	0.644755	3.46257e-42						Scap	0.42291	1.94416e-26						Prkce	0.560172	1.84366e-21
Rpl7a	0.571675	1.07649e-85		Urah	0.720104	0.00270211						Spink5	0.351798	9.52413e-102						Senp6	0.690038	5.57423e-43		Daam1	0.777495	4.698e-42						Lgr4	0.43189	2.63502e-26						Huwe1	0.740668	1.99252e-21
Maf	0.593583	1.42707e-85		Nr6a1	0.702135	0.00294213						Eef1b2	0.702824	1.46826e-101						Sun1	0.558414	6.32414e-43		Serpinb5	0.891051	1.29557e-41						Fam210b	0.284309	2.87906e-26						Ewsr1	0.55911	2.53251e-21
Sgk3	0.434929	1.46712e-85		Smyd3	0.715542	0.00341644						Dusp7	0.463647	1.58465e-100						B4galt1	0.616009	6.81073e-43		Cited2	0.603662	1.50361e-41						Ppif	0.525748	3.52464e-26						Vgll4	0.66721	2.76586e-21
Tmem161b	0.25962	2.18775e-85		Dusp10	0.593975	0.00344077						Slc1a1	0.495857	3.52818e-100						Acer3	0.846738	8.48325e-43		Ermp1	0.422947	2.48624e-41						Sytl1	0.279888	3.90117e-26						Lemd3	0.649767	2.79117e-21
Rpl26	0.574365	3.2071e-85		Erbb3	0.456872	0.00350504						Irx3	0.263466	4.47176e-100						Camsap1	0.60177	1.11522e-42		Krt17	1.56341	2.76824e-41						Krt77	0.854783	4.1376e-26						Ncor1	0.550787	3.24492e-21
Ddx39	0.272389	3.40625e-85		Galnt1	0.745847	0.00351465						Sltm	0.684702	4.90885e-100						Pcdh7	0.900063	1.37611e-42		Rbbp6	0.839566	2.93507e-41						Yap1	0.579795	5.37232e-26						Shroom2	0.487835	3.41616e-21
Mb21d2	0.368264	3.9375e-85		Pfkl	0.535246	0.00353585						Eef2	0.660019	1.1646e-99						Nup98	0.622455	1.46072e-42		Pdzd11	0.408926	3.58721e-41						Abhd5	0.443144	6.54515e-26						Bbx	0.576929	3.79214e-21
Cstdc5	0.84596	5.46014e-85		Pou3f1	0.506025	0.00376073						Arl4a	0.569851	1.79259e-99						Ppm1d	0.553434	1.50005e-42		Sesn2	0.493221	7.34125e-41						Zdhhc5	0.478447	6.85426e-26						Syncrip	0.564488	3.81677e-21
Fam83b	0.276865	5.97094e-85		Frmd6	0.570022	0.00377431						Hsp90ab1	0.56292	2.50357e-99						Hsd17b12	0.686122	1.55485e-42		Uchl3	0.53248	1.14958e-40						D230025D16Rik	0.390739	6.89223e-26						Phip	0.683602	3.95314e-21
Efl1	0.337847	6.12065e-85		Strn3	0.761772	0.00395275						Glo1	0.468757	2.62068e-99						Selenoi	0.561465	1.80152e-42		Psmd8	0.802144	1.18378e-40						Tmem19	0.388652	7.18325e-26						Hnrnpm	0.51305	4.27263e-21
Snx27	0.522759	6.48409e-85		Fam83b	0.530762	0.00401555						Egr3	0.362652	3.18645e-99						Large1	0.802325	1.86784e-42		Cd2ap	0.771514	1.2885e-40						Rcor1	0.585458	7.22906e-26						Tanc1	0.598213	4.66454e-21
Pa2g4	0.364716	6.61268e-85		Atg10	0.41988	0.00406625						Cecr2	0.497211	7.85575e-99						Fut8	0.82807	2.11845e-42		Pex3	0.408574	1.55577e-40						Bicd2	0.463515	8.20997e-26						Kat6a	0.589547	4.83056e-21
Nucks1	0.597663	6.75894e-85		Garem1	0.398823	0.00419385						Dbnl	0.465947	2.6002e-98						Celsr1	0.3707	2.28107e-42		Sgpp1	0.663073	1.83622e-40						Plxna2	0.516572	9.72992e-26						Smarcc1	0.537457	5.83766e-21
Efnb1	0.327349	8.34002e-85		Wwp1	0.575729	0.00454753						Klf12	0.708084	4.09955e-98						Tlk1	0.667844	2.45901e-42		Sema4a	0.256366	2.13126e-40						Prkch	0.50233	1.01473e-25						Nf1	0.482154	6.30518e-21
Mrpl13	0.335717	1.21499e-84		Ptk7	0.413523	0.0045549						Rpl36	0.636144	4.48769e-98						Ubac2	0.670221	2.50358e-42		Zfp800	0.643851	3.59009e-40						Dgka	0.402516	1.09543e-25						Znrf3	0.72577	7.1802e-21
Rps10	0.566149	1.45469e-84		Slc25a24	0.417921	0.00460459						Tmprss11f	0.269747	6.50181e-98						Sema4b	0.564756	2.60227e-42		Adtrp	0.257772	3.82236e-40						Il1f5	0.33755	2.67325e-25						Usp33	0.51336	7.59078e-21
Map3k20	0.656254	1.61308e-84		Pdgfa	0.456294	0.00487536						Rnd3	0.58175	7.16431e-98						Rngtt	0.72394	3.5359e-42		Rapgefl1	0.453036	4.28399e-40						Osbpl5	0.333076	2.73603e-25						Itpr3	0.420852	8.58037e-21
Ubr5	0.721054	1.84297e-84		Stox2	0.812877	0.00488872						Bcl11b	0.550728	9.99611e-98						Gatad2b	0.649062	4.44631e-42		Hook1	0.28809	4.3571e-40						Hsp90ab1	0.462982	4.4889e-25						Rnf38	0.652435	8.98277e-21
Unc45a	0.319518	2.00795e-84		Atp1a1	0.607835	0.00530108						Chmp1a	0.373974	1.09144e-97						Dcbld1	0.525613	5.23363e-42		Ttpal	0.321975	5.29892e-40						Magi1	0.453851	6.42977e-25						Ece1	0.675937	9.03073e-21
Egln1	0.430675	4.3021e-84		Ackr3	0.446478	0.00574254						Arpc5l	0.397508	1.68064e-97						Ecpas	0.647222	5.7077e-42		Mfsd14b	0.700159	9.77903e-40						Pqlc1	0.43377	7.07358e-25						Irx2	0.411538	9.53958e-21
Bmpr1a	0.434628	4.43169e-84		Parp6	0.369132	0.00616641						Ggh	0.583603	2.34874e-97						Ippk	0.480239	5.75027e-42		Tecr	0.74422	1.02352e-39						Ar	0.403864	1.01731e-24						Dennd1a	0.554284	9.60283e-21
Ppp2r3a	0.555348	4.51494e-84		Synpo	0.362728	0.00624454						Tspan9	0.503527	6.67318e-97						Rab27b	0.740814	6.32909e-42		Lad1	0.380662	1.63758e-39						Clcn3	0.462143	1.14173e-24						Arid4a	0.565274	1.07114e-20
Kank1	0.421388	5.32569e-84		Zcchc7	0.670271	0.00635519						Rpl39	0.594725	2.54815e-96						Lysmd4	0.313628	6.90474e-42		Pou2f3	0.49437	2.79612e-39						Hsdl2	0.37267	1.23328e-24						Pls3	0.661404	1.09839e-20
Eef1g	0.562415	1.17858e-83		Tbl1x	0.544725	0.00652526						Elovl1	0.422362	3.36104e-95						Igsf3	0.518222	7.56786e-42		Slc27a4	0.350384	3.19595e-39						Mark4	0.485319	1.39483e-24						Wee1	0.509101	1.16089e-20
Naa25	0.36817	1.39443e-83		Tpm1	0.848149	0.00653781						Eef1g	0.625413	5.1052e-95						Anxa7	0.625437	9.12071e-42		Cdh1	0.685548	4.53748e-39						Naa15	0.540334	1.49068e-24						Zfp326	0.601536	1.25863e-20
Ppm1g	0.336479	2.54982e-83		Prim2	0.417824	0.00678415						Aacs	0.295429	1.15033e-94						Fnbp1	0.606911	1.23761e-41		Prom2	0.36471	5.43359e-39						Pou3f1	0.499447	1.54266e-24						Qser1	0.500112	1.42843e-20
Ptger4	0.267865	3.01985e-83		Cttn	0.647847	0.00689821						Rab11a	0.607439	1.55841e-94						Dhx15	0.688768	1.28227e-41		Tmem43	0.600292	8.02749e-39						Myo1d	0.61835	2.08796e-24						Nsd3	0.512387	1.47544e-20
Naca	0.573023	5.2325e-83		F11r	0.693767	0.00710845						Mtmr1	0.397104	1.56845e-94						Nfia	0.684234	1.34933e-41		Abhd5	0.670771	8.7491e-39						Dynll1	0.728714	2.30291e-24						Epha4	0.599906	1.69733e-20
Phb2	0.390806	8.21247e-83		Mfhas1	0.570118	0.00723575						Abhd5	0.520638	5.88126e-94						Mb21d2	0.55442	1.38338e-41		Arhgap23	0.656512	8.90517e-39						Rps15	0.503782	2.48932e-24						Arih1	0.657232	1.72666e-20
Lrig1	0.35618	8.59316e-83		Cks1b	0.470629	0.0074679						Rpl37a	0.519043	6.3044e-94						Tec	0.879871	1.57566e-41		Rhov	0.286797	1.54334e-38						Zxdc	0.268869	3.81399e-24						L3mbtl3	0.531271	1.9276e-20
Rps17	0.56198	8.74196e-83		Smo	0.390006	0.00753705						Epcam	0.409185	1.11112e-93						Fat2	0.418649	1.67893e-41		Cttnbp2	0.391001	3.56068e-38						Pex14	0.483578	3.81693e-24						Tnrc6a	0.650343	2.00515e-20
Vgll4	0.479448	9.56044e-83		Pdia3	0.611041	0.00754464						Iffo2	0.461269	1.75872e-93						Rab6a	0.629077	2.112e-41		Cd3eap	0.285905	3.60157e-38						Rc3h1	0.615791	4.25996e-24						6720427I07Rik	0.458232	2.16087e-20
Taf1d	0.446067	1.28836e-82		Fmnl2	0.281325	0.00757906						Naca	0.596769	2.03523e-93						Tprg	0.885498	2.11897e-41		Endou	0.477406	3.83261e-38						Ptpn4	0.427335	5.39146e-24						Pdlim5	0.754426	2.22447e-20
Prmt1	0.278087	1.40276e-82		Kdm5b	0.560846	0.00775149						Rpl31	0.642077	4.76999e-93						Bclaf1	0.736185	3.42179e-41		Tmem159	0.371678	3.84788e-38						Tspan8	0.369075	6.34601e-24						Ndufs4	0.607868	2.29928e-20
Eef1a1	0.520624	2.1082e-82		Jpt2	0.469084	0.00776907						F11r	0.545622	6.32041e-93						Psmd11	0.635418	3.42695e-41		Ifi30	0.637807	4.19798e-38						Tmprss11f	0.40719	7.87092e-24						Npepps	0.644303	2.75908e-20
Papss1	0.33608	2.80097e-82		Shb	0.436523	0.0077919						Scrib	0.250133	6.86225e-93						Ipo7	0.638541	3.43217e-41		Chmp4c	0.445812	9.33039e-38						Arf6	0.491701	8.0046e-24						Dsc3	0.369565	2.83068e-20
Npepps	0.668336	3.75259e-82		Cyp51	0.89249	0.0078431						Pgap1	0.254117	1.20588e-92						Hmgcs1	0.542503	3.81902e-41		Agpat4	0.73677	1.14076e-37						Cep170b	0.361222	8.98762e-24						Hdac4	0.502068	3.01825e-20
Gmnn	0.252498	4.40938e-82		Fam210a	0.291114	0.00801744						Elovl6	0.34999	1.62931e-92						Yes1	0.53489	4.26048e-41		Eif5a	0.667787	1.67821e-37						Msmo1	0.487733	9.24958e-24						Lrrc4	0.379166	3.23139e-20
Riok1	0.381669	5.2253e-82		Ngf	0.421538	0.00815705						Rps14	0.559816	1.71574e-92						Aggf1	0.533082	6.55771e-41		Cxadr	0.517235	2.3676e-37						Hmgcs1	0.535319	9.54981e-24						Scaf11	0.504003	3.99504e-20
Usp53	0.320001	5.54157e-82		Dnaja4	0.495543	0.00839454						Npepps	0.682029	1.99261e-92						Rreb1	0.61389	6.8437e-41		Dexi	0.432075	3.15921e-37						Rmnd5a	0.508682	1.24154e-23						Acsl4	0.792247	4.26651e-20
Itpr3	0.321574	9.37693e-82		Yipf5	0.452082	0.00905333						Baiap2l1	0.408329	2.78789e-92						Hace1	0.553371	7.04387e-41		Nr1d1	0.340029	3.25912e-37						Tecr	0.484431	1.60162e-23						Elf1	0.606528	4.37326e-20
Rpl36al	0.562647	1.7813e-81		Dtnb	0.478531	0.00920776						Atp11b	0.65112	1.17913e-91						Perp	0.406493	1.07342e-40		Vasn	0.414144	3.44196e-37						Adamts1	0.528024	1.72525e-23						Shb	0.63761	4.5695e-20
Ctnnd1	0.610048	2.04074e-81		Tpm4	0.632493	0.0096057						Acaa2	0.383062	1.48385e-91						Limd1	0.741565	1.08634e-40		Kctd12	0.720147	3.99424e-37						Pcyox1	0.446363	1.74914e-23						Cnot4	0.632046	4.9206e-20
Perp	0.414475	2.16437e-81		Lrrc59	0.620913	0.0101722						Erlin1	0.306094	1.83478e-91						Unc45a	0.519577	1.16838e-40		Dhcr24	0.293186	3.99627e-37						Guk1	0.366585	1.76998e-23						Ptk2	0.491347	5.16351e-20
Set	0.591442	2.72145e-81		Nup160	0.394044	0.0102967						Serinc2	0.440541	3.52258e-91						Phip	0.679932	1.381e-40		Echdc1	0.279838	4.68367e-37						Efnb1	0.400353	2.01622e-23						Zfp644	0.606223	5.17248e-20
Avpi1	0.526108	3.04829e-81		Cask	0.821373	0.0103665						Gtf2f2	0.625692	3.68305e-91						Bmpr1a	0.601057	1.47582e-40		Erbb3	0.424359	5.84442e-37						Socs5	0.346542	2.08605e-23						Zcchc7	0.553329	5.6293e-20
Ptprz1	0.284295	3.8362e-81		Hmgcs1	1.33449	0.0104813						Rps10	0.562821	4.60832e-91						Dnajc5	0.731711	1.62094e-40		Dsg1b	0.666148	9.79962e-37						Tmem54	0.276619	2.14037e-23						Fat2	0.373109	5.84738e-20
Wdr47	0.30205	4.18477e-81		Txndc17	0.768805	0.0108028						Ippk	0.267484	6.4245e-91						Dhx9	0.780099	2.17587e-40		Egr1	0.68385	1.0438e-36						Cish	0.30702	2.9164e-23						Pds5a	0.667622	5.97382e-20
Mtrex	0.301309	9.87e-81		Plekhb2	0.636887	0.0111326						Dnajb1	0.683794	8.70803e-91						Tlk2	0.669121	2.34534e-40		Clip1	0.663265	2.05651e-36						2610035D17Rik	0.52743	3.08262e-23						Fry	0.659567	6.57442e-20
Limk2	0.312616	1.02835e-80		Cherp	0.464075	0.011163						Ptpn3	0.471618	3.40147e-90						Arhgap21	0.761421	2.48203e-40		Cbx4	0.4586	2.0803e-36						Baiap2l1	0.493998	3.16828e-23						Itpr2	0.537613	7.10763e-20
Nfatc3	0.367871	1.20914e-80		Plekha5	0.706326	0.0115502						Rps27	0.551436	6.11662e-90						Neat1	0.59644	2.60469e-40		Hr	0.399511	2.91266e-36						Abhd6	0.314935	4.5788e-23						Klf4	0.609966	7.3168e-20
Foxk1	0.322034	1.2995e-80		Lman1	0.540952	0.0115967						Emc4	0.305367	1.01217e-89						Adgrl2	0.857033	2.93543e-40		Pkp3	0.525214	3.37757e-36						Pex3	0.302048	4.87597e-23						Sh3pxd2a	0.57422	7.69465e-20
Ssh2	0.5936	1.31046e-80		AI661453	0.312358	0.0118741						Atp5d	0.640101	4.97398e-89						N4bp2l2	0.640098	3.47221e-40		Sptssa	0.758823	4.4661e-36						Dennd2c	0.336961	5.52968e-23						Gsk3b	0.563423	7.73176e-20
Acsl3	0.31359	1.42055e-80		Armh3	0.476301	0.0119269						Dgat2	0.255614	3.22703e-88						Arid5b	0.632693	3.93429e-40		Hsd17b7	0.272045	4.7366e-36						Flnb	0.603093	5.94209e-23						Pds5b	0.491419	8.05349e-20
Rab40c	0.395409	1.69833e-80		Tacc2	0.547605	0.0120558						Egfr	0.717648	4.91366e-88						Setd5	0.63367	4.04714e-40		6430548M08Rik	0.378645	6.55651e-36						Psmd7	0.465334	6.32156e-23						Pde4d	0.62035	8.43143e-20
Sf3b3	0.468249	2.07736e-80		Wipi1	0.374165	0.0123448						Net1	0.362393	8.41573e-88						Afap1l2	0.471197	5.02932e-40		Ephb6	0.381531	1.07552e-35						Atp9a	0.279873	7.14159e-23						Rnd3	0.519565	9.08705e-20
Trappc10	0.368604	2.68534e-80		Phf14	0.513243	0.0146589						Sema4b	0.446256	9.03317e-88						Desi2	0.70747	5.69769e-40		Oas1f	0.436489	1.12886e-35						Nectin2	0.367396	8.03821e-23						Camsap2	0.577008	9.31072e-20
Megf9	0.341542	2.92487e-80		Phlda3	0.648485	0.015112						Gm14164	0.397887	1.04004e-87						Lnpep	0.716099	5.85765e-40		Wwc1	0.574741	2.04633e-35						Hagh	0.392852	8.17849e-23						Top2a	0.700817	1.06903e-19
Alkbh1	0.352312	2.9651e-80		Tmcc3	0.305061	0.0160968						Bag4	0.304155	1.79891e-87						Oga	0.59535	6.2335e-40		Pkp1	0.665078	2.75408e-35						Gata3	0.299535	1.1429e-22						Fus	0.615583	1.09208e-19
Zfp326	0.553155	3.18188e-80		Fto	0.673016	0.0162669						Sdc1	0.604372	6.16743e-87						Abi1	0.466112	6.28316e-40		Arl5b	0.675434	2.94921e-35						Gjb3	0.261365	1.22991e-22						Trim33	0.534667	1.20748e-19
Cpne8	0.492963	3.36104e-80		Wnt4	0.35223	0.0162869						Zfp266	0.395128	1.88731e-86						Sema5a	1.0888	7.86959e-40		Sntb1	0.28745	5.64765e-35						Trim16	0.307949	1.2991e-22						Aplp2	0.431658	1.2173e-19
Abcg2	0.290007	5.87538e-80		Sqle	0.576701	0.0169891						Hagh	0.349299	4.63851e-86						Ppm1b	0.676774	8.32125e-40		Ezr	0.593444	7.98841e-35						Tenm4	0.44495	1.86e-22						Ank	1.1869	1.28231e-19
Dtnb	0.272602	8.89433e-80		Luc7l2	0.584629	0.0186107						Ap1b1	0.349212	6.47442e-86						Fat1	0.541284	1.22081e-39		Clu	0.575147	8.56986e-35						Mboat2	0.617723	2.1968e-22						Sumo1	0.6001	1.51396e-19
Igsf3	0.30924	1.23625e-79		Zfp609	0.517921	0.0199292						Arhgef37	0.29778	1.04973e-85						Shroom4	0.652456	1.47425e-39		Il20rb	0.500811	1.45775e-34						Chp1	0.494306	2.31416e-22						Mkln1	0.5816	1.63156e-19
Eef1b2	0.595778	1.80404e-79		Nt5dc1	0.35047	0.0200124						Megf9	0.418966	1.12446e-85						Arhgap17	0.850012	1.58509e-39		Csnk2a1	0.660806	1.54008e-34						Smagp	0.343704	2.63045e-22						Ahcyl1	0.614821	1.64462e-19
4930523C07Rik	0.49794	2.1609e-79		Airn	0.422733	0.0214385						Aqp3	0.761378	1.21766e-85						Larp1	0.607182	2.11512e-39		Lrrc1	0.616268	1.59078e-34						Psph	0.377215	2.84471e-22						Pum2	0.521541	2.01074e-19
Impdh2	0.356197	2.48692e-79		Strbp	0.536503	0.0215519						Vdr	0.333585	1.59428e-85						Satb1	0.353795	2.44426e-39		Arhgap29	0.500631	1.93006e-34						Dusp7	0.409208	2.93637e-22						Ophn1	0.622369	2.10862e-19
Nop53	0.509163	3.02098e-79		Cdk6	0.63629	0.0216764						Chl1	0.486043	2.06286e-85						Magi1	0.490579	2.59937e-39		Sar1b	0.704382	2.8969e-34						Car13	0.4229	3.01337e-22						Scap	0.495433	2.23484e-19
Hmgcs1	0.539511	3.40181e-79		Micall1	0.566982	0.0217497						Thrb	0.383167	2.31777e-85						Hmbox1	0.559524	2.9104e-39		Fosb	0.585292	8.07831e-34						Ormdl2	0.362782	3.62027e-22						Ppm1b	0.532664	2.25724e-19
S100a10	0.638099	3.84873e-79		Higd1a	0.80911	0.0224366						Rplp2	0.509872	3.98463e-85						Bag4	0.42382	3.25383e-39		Ube2e2	0.623651	8.8108e-34						Cnot2	0.609986	4.3897e-22						Ube2h	0.664747	2.26766e-19
Fbl	0.369663	1.03798e-78		Tax1bp3	0.508762	0.0227596						Prkci	0.447361	4.51034e-85						Strn	0.548731	4.79699e-39		Osbpl5	0.368468	1.09859e-33						Sos2	0.448383	4.79095e-22						Ralgps2	0.49727	2.27424e-19
Clpx	0.401243	1.23693e-78		Camk2d	0.6712	0.0229572						Uqcc2	0.643677	4.72378e-85						Ppm1l	0.610488	4.89427e-39		Ippk	0.379243	1.36588e-33						Uqcc2	0.39616	4.79869e-22						Fxr1	0.512349	2.38238e-19
Rpl29	0.573548	1.50717e-78		Zfp639	0.329859	0.0235967						Arhgef4	0.298831	5.46842e-85						Gapvd1	0.605441	7.43691e-39		Hras	0.648376	1.77996e-33						Rps3a1	0.446794	5.04364e-22						Plekha5	0.540828	2.65884e-19
Trp53inp1	0.277353	1.96885e-78		Snd1	0.827913	0.0240926						Mb21d2	0.380955	6.82499e-85						Foxn3	0.585885	7.89393e-39		Rnf11	0.716562	3.03617e-33						Fam57a	0.313397	6.23427e-22						Foxn3	0.594186	2.92402e-19
Slc22a23	0.434664	2.01314e-78		Rnf141	0.291739	0.0243226						Rps24	0.53431	7.28292e-85						Lrba	0.576901	8.23972e-39		Ptprf	0.657956	4.88289e-33						Bcl11a	0.306758	6.30231e-22						mt-Nd3	0.41982	2.9502e-19
Rps14	0.527723	2.44756e-78		Tpi1	0.716346	0.0243285						Fau	0.485547	9.51756e-85						Dsg1b	0.704752	1.2164e-38		Herc4	0.538176	1.77608e-32						Phldb3	0.267507	8.43771e-22						Mcmbp	0.579693	3.05015e-19
Afap1	0.315426	4.54719e-78		Fgd6	0.362494	0.0258761						Trappc6a	0.406573	1.21181e-84						Ncoa6	0.597974	1.27604e-38		Reep3	0.593241	1.8773e-32						Bcl9l	0.265184	9.41093e-22						Dip2c	0.580811	3.18746e-19
Eif3e	0.524214	6.15536e-78		Ldlr	0.942243	0.0259631						Mctp2	0.358089	1.46654e-84						Crebbp	0.532563	1.42121e-38		Dnajb1	0.702611	2.6182e-32						Egr1	0.717447	1.00557e-21						Top2b	0.456383	3.35577e-19
Hnrnpa3	0.57231	9.60695e-78		Cbx5	0.436658	0.0287044						Higd1a	0.659806	2.47189e-84						Myh14	0.3622	1.54358e-38		Calm1	0.560547	2.62728e-32						Acad9	0.332589	1.05674e-21						Atl2	0.583096	4.59648e-19
Ahnak2	0.453039	9.98964e-78		Gtf3c1	0.390261	0.0311747						Actg1	0.490577	3.13169e-84						Col7a1	0.426718	1.55921e-38		Nectin2	0.528941	2.67397e-32						Bmpr2	0.554191	1.76688e-21						Map2k4	0.597103	4.94986e-19
Atrx	0.62318	1.70595e-77		Sec63	0.634892	0.0320935						Cs	0.532441	3.22999e-84						Tenm2	0.414222	1.69439e-38		Prrg4	0.364926	3.21254e-32						Rpl13	0.466703	2.01517e-21						Csrp1	0.802003	5.15835e-19
Naf1	0.253845	1.76087e-77		Nrip1	0.527481	0.032323						Pard3	0.608046	4.86249e-84						Btaf1	0.728239	1.82274e-38		Nrd1	0.891436	3.66972e-32						Ubn2	0.528941	2.1045e-21						Gm26917	0.669689	8.53595e-19
Rpl18a	0.560503	1.90734e-77		Jup	0.54471	0.032728						Micu2	0.459808	7.33393e-84						Scamp1	0.615825	2.0142e-38		Map2k4	0.615462	4.72678e-32						Gsdmc	0.4762	2.29134e-21						Cdc42bpg	0.315827	9.9063e-19
Arl4a	0.390374	3.32507e-77		Rab11fip5	0.293924	0.0327698						Cstdc5	0.836	2.85849e-83						Actn4	0.588437	2.11306e-38		Clcn3	0.537577	1.68714e-31						Man1a2	0.484317	2.93255e-21						Dek	0.569088	1.03811e-18
Nlrc5	0.391842	4.40539e-77		Tbck	0.438821	0.0336621						Vps13a	0.527585	4.9232e-83						Csnk2a2	0.648005	3.17018e-38		Erbb2	0.281026	1.88077e-31						Akap9	0.482641	3.10747e-21						Ocln	0.463119	1.05427e-18
Antxr1	0.426593	8.42838e-77		Gbf1	0.507	0.0348988						Trp63	0.437467	7.82989e-83						Ppp1cb	0.600818	3.24078e-38		Gcat	0.45975	2.96062e-31						Txnrd3	0.263778	3.98315e-21						Sfpq	0.531114	1.19175e-18
Ptp4a2	0.602053	8.69114e-77		Utrn	0.526098	0.0349569						Pdlim2	0.26972	1.00199e-82						Appbp2	0.572374	3.41914e-38		Med4	0.418002	3.00839e-31						Nmt2	0.516719	4.22544e-21						Rbm26	0.528002	1.23059e-18
B3galnt2	0.267129	9.95165e-77		Tgfb2	0.772606	0.0355924						Capn1	0.348303	1.07254e-82						Bicd2	0.558329	3.43894e-38		Slco3a1	0.588441	3.58748e-31						Arhgef12	0.399314	4.31379e-21						Ankrd28	0.688819	1.32568e-18
Ndufa4l2	0.667411	1.47682e-76		Cr1l	0.396578	0.0391591						Ptma	0.493089	1.10843e-82						Kank1	0.570553	3.60633e-38		Slc35e4	0.47682	3.68478e-31						5330438D12Rik	0.260614	4.34674e-21						Ivns1abp	0.50299	1.56504e-18
Jup	0.394418	1.49716e-76		Mink1	0.435458	0.0392937						Rpl36al	0.555623	2.39343e-82						Rel	0.600192	3.70002e-38		Tead1	0.630504	4.08059e-31						Rhod	0.257262	5.10379e-21						Kdm1a	0.526977	1.61551e-18
Osgin2	0.277132	1.49842e-76		S100a16	0.558282	0.0395902						Rnh1	0.576472	3.23651e-82						Nipbl	0.527429	5.07003e-38		Ubqln1	0.551682	4.29516e-31						Prnp	0.420988	6.14791e-21						Uap1	0.719143	1.64127e-18
Gja1	0.499452	1.58663e-76		Nxn	0.634422	0.0420267						Rxra	0.278044	3.41706e-82						D16Ertd472e	0.507189	5.39438e-38		Spint2	0.453409	4.46702e-31						Mpzl2	0.267999	7.06447e-21						Fgd6	0.578077	1.69251e-18
Larp4	0.537375	2.36192e-76		Bsg	0.658722	0.0423645						Limk2	0.320467	5.44895e-82						2610020C07Rik	0.414305	5.93645e-38		Dstn	0.589441	5.60028e-31						Fdps	0.395716	7.57052e-21						Nckap5	0.612555	1.80984e-18
Myo1e	0.648616	3.28454e-76		Slc30a9	0.4097	0.0427462						Cpeb3	0.440441	6.84286e-82						Kdm5c	0.635266	6.01511e-38		Hars	0.406354	5.77687e-31						Tiam1	0.393279	8.13315e-21						Sdc4	0.533074	1.82459e-18
Cd9	0.416549	3.52623e-76		Nbas	0.355238	0.0461402						Epb41l4a	0.25839	7.32005e-82						Rbm39	0.487109	6.67183e-38		Sh3rf2	0.475647	6.598e-31						Slain2	0.415136	9.84876e-21						Gtf2f2	0.679681	2.03047e-18
Crim1	0.574366	4.2479e-76										Slc25a17	0.322135	1.37283e-81						Znrf2	0.611094	1.00942e-37		Plekhg1	0.426077	6.82602e-31						Tom1l2	0.507292	1.03377e-20						Tcf7l1	0.666678	2.04369e-18
Bcl7c	0.348297	7.99566e-76										Rgmb	0.255584	1.9349e-81						Trim16	0.398739	1.12522e-37		Rbp2	0.450225	6.99674e-31						Reep4	0.284462	1.19166e-20						Stt3b	0.579774	2.3621e-18
Ndufb11	0.502557	8.77344e-76										Stard5	0.281974	2.12183e-81						Ino80	0.605193	1.29449e-37		Map3k20	0.608463	1.03041e-30						Bace2	0.335284	1.35326e-20						Clock	0.579169	2.36962e-18
Nedd4l	0.693671	9.58113e-76										Eif3k	0.567975	4.48375e-81						Rlf	0.596301	1.40408e-37		Mfsd6	0.499955	1.04287e-30						Cyp51	0.465861	1.4711e-20						Tbc1d12	0.548465	2.88879e-18
Pebp1	0.547295	1.00707e-75										2610528A11Rik	0.605396	5.5556e-81						U2surp	0.603352	1.53416e-37		Sphk2	0.27512	1.07077e-30						Nek7	0.558032	1.80909e-20						Snrnp70	0.546287	3.07179e-18
Sh3pxd2a	0.498977	1.31683e-75										Ppm1d	0.33646	1.05802e-80						Nrg1	0.914328	1.77422e-37		Sfn	0.725094	1.10648e-30						Zfp385a	0.325188	2.03101e-20						Zfp36l2	0.520299	3.288e-18
Emg1	0.305133	3.66509e-75										Pdcd4	0.414657	1.25192e-80						Cdh3	0.501534	2.09329e-37		Sh3bgrl2	0.30026	1.60246e-30						Rpl17	0.486323	2.48662e-20						Smurf2	0.677523	3.38123e-18
G3bp1	0.550717	4.12325e-75										Rpl27	0.54082	1.56459e-80						Pip5k1a	0.644063	2.50813e-37		Ube2n	0.691407	1.66786e-30						Rasal2	0.335267	2.55742e-20						Hnrnpa2b1	0.436731	3.48937e-18
Mad1l1	0.263526	4.22234e-75										Slc25a25	0.468263	4.00134e-80						Tax1bp1	0.48143	2.81064e-37		Atp5d	0.621271	1.95154e-30						Ambra1	0.489282	2.60513e-20						Paip1	0.508947	3.865e-18
Notch1	0.344815	4.23108e-75										Mreg	0.263165	1.48821e-79						Tmem65	0.59948	2.8785e-37		Arhgef10l	0.572065	2.38969e-30						Phlpp1	0.380883	3.00247e-20						Arhgap35	0.467772	3.91674e-18
Iffo2	0.316124	4.9066e-75										Ust	0.529434	1.8564e-79						Polr3g	0.490996	3.09859e-37		Pard6g	0.548404	5.55508e-30						4833439L19Rik	0.389597	3.10048e-20						Socs5	0.473958	4.60994e-18
Ncbp1	0.253664	5.1967e-75										Il6ra	0.434974	1.94809e-79						Rasal2	0.563716	3.27646e-37		Dusp7	0.414274	7.08515e-30						Ktn1	0.445234	3.31876e-20						Pbx1	0.506521	5.45925e-18
Adrb2	0.251207	7.67456e-75										Nectin2	0.393172	2.37271e-79						Osgin2	0.429952	3.38755e-37		Mfap3l	0.301422	8.46584e-30						Ubxn2a	0.277507	3.71377e-20						Xrn2	0.508259	5.76236e-18
Slc9a1	0.469412	8.58195e-75										Polr1d	0.570011	3.6794e-79						Stt3b	0.649092	3.51553e-37		Pgrmc2	0.547074	1.11557e-29						Ammecr1	0.375852	4.09016e-20						Luc7l2	0.469908	7.28745e-18
Pqlc1	0.400132	9.47615e-75										Eif3f	0.577863	4.37297e-79						Evpl	0.494637	3.79944e-37		Rab5a	0.719944	1.241e-29						Strbp	0.388932	4.56624e-20						Zbtb20	0.513013	7.76646e-18
Rnd3	0.622739	1.01564e-74										Rrn3	0.252756	5.24512e-79						Rptor	0.547964	3.95609e-37		Rapgef4	0.532177	1.37247e-29						Reps1	0.429993	4.87601e-20						Spata5	0.535156	9.19282e-18
Mt2	0.513825	1.34239e-74										Qars	0.401822	6.84106e-79						Jarid2	0.564606	4.72743e-37		Acsl1	0.6163	1.73596e-29						Atp5d	0.440294	5.36641e-20						Sppl3	0.619143	9.1979e-18
Strn3	0.627527	1.86301e-74										Sh3glb2	0.264249	8.03066e-79						Itsn2	0.750072	4.92694e-37		Fam234a	0.49446	2.43671e-29						Galnt18	0.424363	5.71396e-20						Smarca5	0.570977	9.58367e-18
Zfyve9	0.421816	2.15232e-74										Gas6	0.294321	1.37882e-78						Epb41	0.562405	5.37468e-37		Kif1c	0.560701	2.63391e-29						Cnot6l	0.477183	6.23196e-20						Wapl	0.514464	1.00751e-17
Naa16	0.333709	3.16994e-74										Arhgef5	0.278174	2.08931e-78						Brwd3	0.524581	5.50418e-37		Arhgap17	0.761355	2.70873e-29						Huwe1	0.528547	8.0066e-20						Psme4	0.678218	1.02411e-17
Csnk1a1	0.530328	3.9849e-74										Crip2	0.511693	2.10705e-78						9930021J03Rik	0.594888	6.43616e-37		Dohh	0.276658	2.73171e-29						Hadha	0.381393	9.02373e-20						Taf15	0.500026	1.08401e-17
Rpl35	0.544255	5.04195e-74										Ctnnbip1	0.316815	2.11716e-78						Papola	0.58198	7.89435e-37		Arfgap2	0.418302	2.89934e-29						Gng12	0.458475	9.08711e-20						Svil	0.577842	1.15819e-17
Rplp2	0.471109	5.05838e-74										Igsf3	0.333625	2.16574e-78						Jmjd1c	0.553555	8.42236e-37		Sft2d2	0.369286	3.48065e-29						Hace1	0.449988	1.11595e-19						Bcar1	0.339597	1.29722e-17
Gsto1	0.382921	5.14598e-74										Csnk1a1	0.52012	3.1994e-78						Scyl2	0.539147	9.41031e-37		Efnb2	0.671066	5.01247e-29						Nemf	0.462923	1.12832e-19						9530026P05Rik	0.64134	1.40794e-17
Arap2	0.301076	6.30073e-74										Ak2	0.456718	3.66704e-78						Sumo1	0.66648	9.66204e-37		Celsr2	0.37689	5.38772e-29						Ube2g1	0.453497	1.20738e-19						Tial1	0.517152	1.42213e-17
Tspan3	0.659838	6.80854e-74										Rps29	0.474605	5.24949e-78						Eps15l1	0.5607	1.29338e-36		Rab11a	0.592416	9.87526e-29						Ppfia1	0.431036	1.22597e-19						Arid1a	0.538519	1.81335e-17
Metap2	0.499342	1.09531e-73										Rpl7a	0.534222	6.51807e-78						Xpo7	0.584694	1.45166e-36		Ormdl2	0.368466	1.25228e-28						Mbp	0.400758	1.51847e-19						Birc6	0.477518	1.81894e-17
Stox2	0.323702	1.18515e-73										Clip1	0.575876	8.15704e-78						Gm26917	0.616715	1.45873e-36		Huwe1	0.591334	1.60319e-28						Rnf167	0.27	1.85426e-19						Kansl1	0.553656	2.14309e-17
Ppp3ca	0.60203	1.38824e-73										Rps17	0.540562	1.0215e-77						Eed	0.567272	1.46506e-36		Pon2	0.637619	1.72324e-28						Cs	0.41824	2.2393e-19						Btbd7	0.527928	2.28819e-17
Carnmt1	0.279538	1.77059e-73										Sun1	0.340283	1.66784e-77						Btbd10	0.571897	1.75531e-36		Chmp2b	0.492858	2.43745e-28						Metap1	0.407874	2.48905e-19						Utp20	0.373109	2.41521e-17
Selenoi	0.360374	2.48705e-73										Slc6a8	0.350671	3.54435e-77						Klc1	0.620614	1.84042e-36		Krt1	1.19231	3.3244e-28						Gpr160	0.257492	2.59984e-19						Tax1bp1	0.456763	2.81251e-17
Cse1l	0.334905	2.87764e-73										Tnks1bp1	0.311774	5.20903e-77						2007-03-01	0.485886	1.84219e-36		Serpinb2	0.714741	3.40612e-28						Rpl7	0.445707	2.80547e-19						Pacs1	0.582733	3.13358e-17
Snrpg	0.548585	3.02917e-73										Znrf2	0.556668	1.02072e-76						Relch	0.615178	1.9412e-36		Calm2	0.644089	4.08377e-28						Klf3	0.425595	2.94123e-19						Ezh2	0.547722	3.31036e-17
Ddx10	0.321519	3.03975e-73										Ppdpf	0.309029	1.06432e-76						Upf2	0.531069	2.01199e-36		Itsn2	0.717394	6.89271e-28						Ptpn14	0.305719	2.99558e-19						Pcm1	0.529364	3.57093e-17
Snrpd3	0.348055	3.7624e-73										Kank1	0.327333	1.29644e-76						2005-03-01	0.593988	2.09732e-36		Areg	0.314271	8.95841e-28						Mtmr1	0.324844	3.1929e-19						Rcc2	0.459421	3.88344e-17
Eef2	0.577425	3.983e-73										Sprr1b	0.845936	1.48186e-76						Ptger4	0.516389	2.29001e-36		Ankrd22	0.422477	9.69763e-28						Tmem134	0.400704	3.25587e-19						Srpk2	0.574851	4.01602e-17
Flvcr1	0.29224	4.12567e-73										Grpel2	0.279727	2.05483e-76						Mib1	0.59951	2.33113e-36		Polb	0.572456	1.13068e-27						Ryk	0.283145	3.26525e-19						Btaf1	0.579106	4.34113e-17
Gnl3	0.442938	6.12412e-73										Vdac1	0.543507	2.60902e-76						Tcf12	0.546544	2.84034e-36		Zdhhc5	0.533396	1.27506e-27						Rpl5	0.467875	3.27432e-19						Rtf1	0.511625	4.37947e-17
Pum1	0.573262	7.48313e-73										Sgms1	0.649753	3.81509e-76						Ncoa1	0.649339	4.03165e-36		Prelid3b	0.40401	1.39625e-27						Gpcpd1	0.553458	3.4506e-19						Megf9	0.454161	5.04228e-17
Mfn1	0.253633	1.00557e-72										Atox1	0.545585	5.23614e-76						Ubr3	0.595573	4.12374e-36		Rhou	0.338351	1.57269e-27						Tmem65	0.430676	4.01718e-19						Pafah1b1	0.516141	5.0603e-17
Atp5a1	0.535235	1.99597e-72										Acly	0.420499	1.05443e-75						Etl4	0.5962	5.02487e-36		Eif1ad	0.368687	3.53379e-27						Ppp1cb	0.479022	5.40793e-19						Far1	0.473717	5.08416e-17
Slmap	0.588558	2.11907e-72										Rpl36a	0.530188	5.10882e-75						Gpr107	0.538592	5.17273e-36		Tpm1	0.498247	3.98424e-27						Actn4	0.498535	5.93528e-19						Gtf2i	0.475645	5.55927e-17
Pak1ip1	0.270423	2.31883e-72										Btf3	0.543522	5.53847e-75						Tmem131l	0.596785	5.35002e-36		Atg101	0.355615	4.37164e-27						Arhgap42	0.396108	6.05744e-19						Srsf10	0.483288	5.86549e-17
Tex10	0.270154	3.4494e-72										Gnai1	0.491606	7.70954e-75						Srrm2	0.506069	5.72363e-36		Afdn	0.479124	5.37356e-27						Plekhn1	0.338769	6.16451e-19						Tcf20	0.573859	6.18579e-17
Eef1d	0.51553	3.82919e-72										Ide	0.345781	1.5942e-74						Map4k5	0.655401	7.04499e-36		Mospd1	0.25157	5.38978e-27						Epha2	0.301604	6.20462e-19						Atf7	0.491738	6.3934e-17
Esyt2	0.766329	4.56554e-72										Unc45a	0.367071	1.71263e-74						Foxk1	0.460948	7.28899e-36		Gnai3	0.565755	7.31342e-27						Zcchc8	0.289563	6.27306e-19						Zbtb44	0.407453	6.45668e-17
Sumo1	0.593108	5.58636e-72										Dnase2a	0.272615	1.90345e-74						Mycbp2	0.532115	7.6405e-36		Ckb	0.481409	7.6461e-27						Pmm1	0.286647	6.96918e-19						Dcaf1	0.481869	6.75152e-17
Rnf145	0.33988	5.74498e-72										Hbegf	0.476066	2.82087e-74						Ppp2r2a	0.568828	8.28448e-36		Bicd2	0.602294	7.83662e-27						Ier2	0.476758	7.25992e-19						Hr	0.432025	6.85462e-17
Ror1	0.523674	7.40883e-72										Rps21	0.468847	6.04773e-74						Mbnl1	0.735165	8.29971e-36		Fos	0.505099	9.09214e-27						Mob2	0.394465	7.72055e-19						Ptbp2	0.574307	1.12731e-16
Dtymk	0.268856	8.21982e-72										Crybg1	0.438734	6.9086e-74						Uap1	0.695648	8.37688e-36		Rab11fip1	0.402029	1.27498e-26						Top2b	0.435639	8.05104e-19						Gphn	0.406333	1.15691e-16
Tanc2	0.503995	8.55318e-72										Ank	0.279344	9.81386e-74						Fgfr3	0.377529	8.44927e-36		Prdx2	0.65428	1.3468e-26						Appl1	0.390869	9.38307e-19						Hnrnpd	0.480258	1.2511e-16
Fut8	0.470439	1.08845e-71										Camsap1	0.320909	1.11901e-73						St5	0.671196	8.65986e-36		Cramp1l	0.546485	1.49293e-26						Top1	0.461979	9.38339e-19						Srsf11	0.478552	1.28962e-16
Luc7l3	0.535367	1.13749e-71										Naa15	0.565517	1.89003e-73						Ern1	0.425063	1.03754e-35		Arl4a	0.54325	1.63925e-26						Lrba	0.363122	9.59518e-19						Usp10	0.420903	1.32999e-16
Uba2	0.322399	1.2135e-71										Cadm1	0.350135	2.85492e-73						Larp1b	0.528939	1.07308e-35		Plk3	0.551559	1.76633e-26						Map4k3	0.553404	9.63361e-19						Rbbp4	0.517961	1.37183e-16
Capn1	0.268221	1.26816e-71										Sox6	0.304298	3.82434e-73						Mill1	0.700185	1.12181e-35		Slc39a8	0.344067	1.8245e-26						Brap	0.322274	9.80056e-19						Rabep1	0.613702	1.43807e-16
Ktn1	0.485111	2.35772e-71										Bcl7c	0.398486	4.70139e-73						Zfand6	0.573383	1.21005e-35		Mctp2	0.381261	2.17477e-26						Dcaf1	0.407938	9.99554e-19						Rdx	0.501208	1.44452e-16
Rps25	0.503654	2.43634e-71										Scap	0.344053	6.04769e-73						Ptbp3	0.533516	1.21681e-35		Slc26a2	0.483127	2.55105e-26						Cyb561	0.269678	1.01144e-18						Ythdc1	0.597865	1.55892e-16
Tdrd3	0.253381	2.45692e-71										Ahnak	0.522475	7.41914e-73						Ammecr1l	0.482297	1.51719e-35		Slc30a4	0.39208	3.0268e-26						Cstb	0.687909	1.05796e-18						mt-Nd5	0.388031	1.64485e-16
Ndufs8	0.258015	3.342e-71										Dip2b	0.595463	1.19934e-72						Cse1l	0.524531	1.57624e-35		Ppp1r13l	0.265667	4.28722e-26						Ptma	0.44163	1.09714e-18						Ptp4a2	0.515227	1.99097e-16
S100a16	0.443322	3.83946e-71										Stim1	0.55589	1.52466e-72						Nfat5	0.596526	1.59836e-35		Gba	0.339933	5.14251e-26						Unc45a	0.349605	1.17777e-18						Efnb1	0.389263	2.13127e-16
Vdac1	0.440266	4.013e-71										Mboat2	0.490213	2.62136e-72						Rbm27	0.615406	1.69752e-35		Gata3	0.454652	5.60177e-26						Acsl1	0.414914	1.30487e-18						Mdn1	0.450891	2.19883e-16
Mir100hg	0.56027	4.45019e-71										Pmvk	0.290101	3.90724e-72						Rrn3	0.438438	1.72044e-35		Nipal2	0.408937	9.6254e-26						Rps26	0.41664	1.55726e-18						Map3k3	0.619605	3.04347e-16
Smarcc1	0.396602	6.15124e-71										Spint2	0.325142	5.57289e-72						Fmr1	0.618897	2.40212e-35		Lmtk2	0.400398	1.03679e-25						Atp5a1	0.422523	1.69377e-18						Asxl1	0.545429	3.22168e-16
Abcd3	0.345892	6.68912e-71										Ywhaz	0.502039	6.33574e-72						Clock	0.602415	2.52169e-35		Lmbrd2	0.480647	1.78006e-25						Gpc4	0.491968	1.71394e-18						Bzw2	0.622293	3.86115e-16
Fnbp1l	0.495105	7.89943e-71										Mafb	0.387682	7.08859e-72						Ankhd1	0.512417	2.84584e-35		Fuca1	0.561379	2.09597e-25						Znrf2	0.419049	1.86134e-18						Susd6	0.614892	4.405e-16
Myo18a	0.401405	1.52734e-70										Eif6	0.522145	1.12659e-71						Zfc3h1	0.693034	2.85433e-35		Ndel1	0.529326	2.71676e-25						Rpl12	0.468688	2.02703e-18						Mtf2	0.456682	4.69226e-16
Nup153	0.457037	1.7111e-70										Skp1a	0.464427	1.6703e-71						Htt	0.567163	3.33725e-35		Sh3d19	0.604309	2.86314e-25						Slc25a5	0.462492	2.07588e-18						Dpm1	0.462807	4.72685e-16
Mki67	0.788367	2.64919e-70										Parl	0.295772	1.6888e-71						Pnisr	0.625914	3.41448e-35		Plxnb2	0.470569	3.20592e-25						Tead3	0.254112	2.17718e-18						Atp13a3	0.591469	5.2649e-16
Uri1	0.296394	3.21318e-70										Rpl35a	0.471199	1.76553e-71						Lrch3	0.720658	3.62838e-35		Abca3	0.284136	3.36176e-25						Baz2a	0.417792	2.39263e-18						Agfg1	0.473406	5.43067e-16
Met	0.341261	3.21729e-70										Zfp706	0.459869	1.89891e-71						Fbxw7	0.580437	3.77861e-35		Pdzd2	0.569703	3.47493e-25						Jun	0.583569	2.39755e-18						Tcerg1	0.531496	5.69037e-16
Ilf2	0.259674	3.40796e-70										Eef1d	0.516127	2.00699e-71						Atrnl1	0.529567	4.39562e-35		Mill1	0.464885	4.2388e-25						Cipc	0.263652	2.73108e-18						Hnrnpr	0.46536	5.79002e-16
Hnrnpr	0.371382	4.10639e-70										Ndufc1	0.503438	2.68017e-71						Ogt	0.562641	5.14685e-35		Ptpn14	0.437095	6.42787e-25						Cdk19	0.407656	2.83126e-18						Lrrc1	0.477832	7.565e-16
Eif2s2	0.503236	4.70892e-70										Arhgap32	0.422526	3.19088e-71						Baz2a	0.551397	6.67256e-35		Atp6v0a2	0.383092	7.37227e-25						Rpl30	0.426018	2.945e-18						Rbm39	0.403891	8.41172e-16
Rpl23a	0.516487	6.27277e-70										Med4	0.260262	3.93507e-71						Usp9x	0.611516	7.91474e-35		H2afj	0.54155	7.48661e-25						Ssbp3	0.378337	2.99195e-18						Pus7	0.366399	9.27158e-16
Adss	0.466882	7.1516e-70										Plbd1	0.348745	4.00229e-71						Tcf20	0.576973	9.28708e-35		Sh3gl1	0.416166	7.79677e-25						Plekha1	0.427383	3.65724e-18						Ino80	0.495706	9.61957e-16
Trim33	0.503808	8.07212e-70										Rangap1	0.420898	6.11542e-71						Larp4	0.67216	1.02835e-34		Amotl1	0.455354	1.09069e-24						Prrg4	0.267535	3.8519e-18						Map3k2	0.729072	1.15281e-15
Rps24	0.48441	1.23207e-69										Rpl41	0.453246	6.16901e-71						Amotl1	0.513159	1.10159e-34		Capn15	0.41275	1.1916e-24						Csnk2b	0.423259	4.04154e-18						Sec63	0.451144	1.19054e-15
Crybg1	0.38956	1.2502e-69										Rab18	0.457575	7.3568e-71						Wdfy2	0.624991	1.16888e-34		Zfand6	0.878905	1.24323e-24						Golga4	0.466419	4.49841e-18						Eed	0.499081	1.23271e-15
H2-Q7	0.396399	1.33936e-69										Atpif1	0.533111	9.54025e-71						Ppp4r1	0.579875	1.23239e-34		Mpzl2	0.287951	1.34032e-24						Eef2	0.460105	4.67588e-18						Fyttd1	0.486593	1.27162e-15
Ndufa12	0.36347	1.48824e-69										Pcyox1	0.31247	1.06306e-70						Snx27	0.590649	1.40763e-34		Tmprss4	0.595212	1.47587e-24						Psen1	0.413235	4.88563e-18						Tspan9	0.494505	1.28818e-15
Rere	0.589952	1.56814e-69										H2afj	0.560785	1.33511e-70						Memo1	0.638964	1.44638e-34		Rel	0.543014	1.51323e-24						Flrt3	0.303232	4.8936e-18						Pola1	0.503024	1.32429e-15
Reps1	0.477886	2.17724e-69										Phlda3	0.328935	1.52251e-70						Supt6	0.517235	1.48595e-34		Pard3	0.556177	1.65217e-24						Sptan1	0.429954	5.03253e-18						Maco1	0.474946	1.35147e-15
Dcaf1	0.288134	2.19049e-69										Hacd2	0.43887	1.79644e-70						Map2	1.1855	1.51823e-34		Dapp1	0.25927	1.72007e-24						Zfp598	0.265436	6.06571e-18						Jmjd1c	0.536033	1.53258e-15
Pdlim1	0.262101	3.73763e-69										Clpx	0.412631	2.96226e-70						Nop58	0.496769	1.56384e-34		Scd1	0.307714	1.80376e-24						Cnksr3	0.298517	6.99273e-18						Hmgb1	0.544704	1.54066e-15
Uba52	0.49555	4.02261e-69										Srpk2	0.591033	3.08444e-70						Lama3	0.485909	1.63445e-34		Dhrs1	0.421885	2.10067e-24						Gramd3	0.501075	8.32583e-18						Ap1ar	0.529886	1.54855e-15
Dpm1	0.486471	4.41707e-69										Hmgcr	0.360997	1.1347e-69						Nmt2	0.623654	1.70318e-34		Rassf5	0.556166	2.23613e-24						H2afj	0.479517	8.41686e-18						Txlng	0.461098	1.57234e-15
Trip11	0.459269	5.21265e-69										Rpl34	0.496635	1.30005e-69						Sfpq	0.541444	2.04744e-34		Hbegf	0.53646	2.66915e-24						Ppp1r37	0.322106	8.78553e-18						Id1	0.496303	1.81948e-15
Mrpl23	0.300052	5.74121e-69										Myo18a	0.425452	1.86732e-69						Dock9	0.511888	2.30792e-34		Urah	0.483793	2.71256e-24						Arpc1a	0.360908	8.85844e-18						Sf3b3	0.463956	1.96958e-15
Galnt18	0.322405	8.22123e-69										Ubac2	0.436933	2.85571e-69						Rmnd5a	0.546293	2.58214e-34		Tuba1a	0.438948	3.1688e-24						Smpdl3a	0.353667	9.00541e-18						Bcas3	0.667212	1.99651e-15
Bclaf1	0.555948	8.49945e-69										Taf13	0.306033	3.92521e-69						Pkp3	0.389601	3.08756e-34		Mid1ip1	0.275283	3.23868e-24						Rab27b	0.401218	9.34575e-18						Smarca2	0.533618	2.05893e-15
Rpl39	0.520217	1.19082e-68										Krt16	0.963251	1.07133e-68						Bcl11a	0.394233	3.19634e-34		S100a16	0.489324	3.73187e-24						Serbp1	0.395459	1.09174e-17						Ehbp1	0.506398	2.08285e-15
Rfx7	0.408948	1.41666e-68										Zdhhc3	0.344697	1.39155e-68						Birc6	0.558276	3.68484e-34		D8Ertd738e	0.731951	4.65028e-24						Rps16	0.431238	1.12828e-17						Gpbp1l1	0.470014	2.10238e-15
Dnm1l	0.331634	1.42006e-68										Papss1	0.324289	1.78721e-68						Ece1	0.54088	3.78076e-34		Nupr1	0.530906	5.31994e-24						Jmy	0.381157	1.20975e-17						Arhgap42	0.515573	2.12505e-15
Postn	0.727282	1.65087e-68										Rps28	0.468828	4.15271e-68						Baz1a	0.615108	4.36841e-34		Aacs	0.265754	5.903e-24						Hbegf	0.501145	1.30629e-17						Zfc3h1	0.491617	2.16648e-15
Mink1	0.326366	2.50948e-68										Eif3i	0.488302	6.87162e-68						Rsf1	0.673369	4.67473e-34		Frmd6	0.487533	7.57458e-24						Sqle	0.315264	1.32405e-17						Celf1	0.453683	2.35912e-15
Got2	0.312758	3.40239e-68										Ech1	0.319366	1.17958e-67						Epha2	0.38876	5.66024e-34		Pip5k1a	0.57435	9.14037e-24						Fcgbp	0.483609	1.34467e-17						Mid2	0.453763	2.37659e-15
Chd6	0.363113	4.30915e-68										Slc30a4	0.3205	1.34386e-67						Fer	0.585293	5.77059e-34		Qsox1	0.455255	1.23189e-23						Chmp2b	0.382637	1.45864e-17						Serbp1	0.353933	2.40223e-15
Fdft1	0.324288	4.8032e-68										Pls3	0.508407	1.42821e-67						Sh3pxd2a	0.548787	6.21713e-34		Midn	0.443098	2.37139e-23						Btbd10	0.353696	1.4665e-17						Klf5	0.49844	2.47459e-15
Tmem131l	0.373523	5.04551e-68										Tubb2a	0.499592	1.85403e-67						Slain2	0.618337	6.98724e-34		Bin3	0.321855	2.80064e-23						Ralbp1	0.393488	1.55303e-17						Tjp2	0.564674	2.63173e-15
Top2a	0.80927	8.82738e-68										Gm11808	0.43223	2.41339e-67						Stag2	0.548225	7.27658e-34		Pld3	0.446178	3.24601e-23						Csnk1a1	0.455646	1.79622e-17						Gm37240	0.512347	2.86708e-15
Lima1	0.429448	9.01159e-68										Slc25a5	0.480667	6.13051e-67						Bcl2l13	0.445583	1.18586e-33		Adipor2	0.544219	3.43537e-23						Rfx7	0.415476	2.00701e-17						Ilf3	0.451313	2.88302e-15
Gm14164	0.257587	9.71855e-68										Mark4	0.372628	7.08605e-67						Nod2	0.593108	1.33551e-33		Ppfibp2	0.269617	3.83455e-23						Srpk2	0.355222	2.02089e-17						Myo9a	0.609822	2.89926e-15
Hnrnpab	0.514061	1.27144e-67										Rnpepl1	0.272418	8.23053e-67						Irx2	0.396306	1.37745e-33		Wipf2	0.494319	4.82314e-23						Idi1	0.465535	2.10506e-17						Csad	0.356763	2.98035e-15
Acer3	0.554215	1.58534e-67										Ppp1r14b	0.45161	1.00197e-66						Usp7	0.58167	1.46005e-33		Prkch	0.526969	5.65952e-23						Amotl1	0.373613	2.47323e-17						Shtn1	0.449491	3.11459e-15
Ccdc6	0.365219	1.93468e-67										Klk5	0.253007	1.10269e-66						Atxn7	0.570558	1.57998e-33		Pik3cb	0.525967	6.41875e-23						Arl8b	0.39831	2.67725e-17						Slk	0.562948	3.18733e-15
Rpl35a	0.468447	2.1518e-67										Pdzd2	0.288378	1.33103e-66						Rad23b	0.519469	1.74048e-33		Ranbp10	0.392788	6.78021e-23						Rel	0.441204	2.6982e-17						Ube3a	0.451581	3.57362e-15
Ddx21	0.370748	2.67483e-67										Car13	0.318192	1.34092e-66						Gsk3b	0.598173	1.97706e-33		Tmcc3	0.421381	1.07592e-22						Nhp2	0.365728	3.27167e-17						Strn	0.46888	3.58191e-15
F11r	0.356065	3.6227e-67										Zdhhc5	0.385503	2.02088e-66						Grpel2	0.380859	2.43958e-33		Pmm1	0.30899	1.14425e-22						Slc41a1	0.301918	3.43615e-17						Ripk4	0.351399	4.56572e-15
Anp32b	0.531772	3.63056e-67										Polb	0.480969	4.1358e-66						Mbip	0.367635	2.47889e-33		Fam83b	0.41319	1.34992e-22						Frmd6	0.352446	3.46268e-17						Mib1	0.498445	4.63073e-15
Ipo7	0.462802	3.88014e-67										Nckap1	0.505681	5.20557e-66						Ddx10	0.554932	2.97974e-33		Wfdc21	0.915134	1.60057e-22						Egr3	0.323426	3.56514e-17						Kmt2e	0.545418	4.70485e-15
Luzp1	0.546346	4.94291e-67										Arhgef11	0.463399	9.1415e-66						Plaa	0.546835	3.06867e-33		Ahnak	0.46377	1.87313e-22						Ctr9	0.274655	3.69334e-17						Trpm7	0.564142	4.93228e-15
Nectin1	0.347507	5.02313e-67										Retreg3	0.375384	9.30223e-66						Cyp51	0.498215	3.36485e-33		Zdhhc9	0.420304	2.1399e-22						Epb41	0.333498	3.82557e-17						Gapvd1	0.484014	5.37423e-15
Cdyl	0.373636	5.2332e-67										Pim3	0.401398	9.34965e-66						Skint3	0.895953	3.7414e-33		F3	0.718285	2.5989e-22						Gtf2f2	0.400201	4.37549e-17						Mast4	0.342051	5.39971e-15
Tmem51	0.258511	5.94753e-67										Csnk2b	0.420241	1.3054e-65						Osbpl8	0.514442	4.39688e-33		Nfe2l1	0.524545	2.62685e-22						Cramp1l	0.410153	4.46215e-17						Prpf4b	0.493232	6.2387e-15
Slc25a17	0.25135	8.64689e-67										Ola1	0.336677	2.45152e-65						Thrap3	0.513056	4.52408e-33		Arap2	0.35286	2.63273e-22						Endou	0.443505	4.69657e-17						Ppp2r2a	0.457703	6.24001e-15
E130308A19Rik	0.276005	9.33712e-67										Cdyl	0.514865	3.04177e-65						Cs	0.55054	4.66146e-33		Zfp266	0.409809	2.87417e-22						Rplp0	0.426204	5.17037e-17						5330438D12Rik	0.615423	6.25052e-15
Hmgn3	0.269421	1.24018e-66										Ezr	0.439088	3.20973e-65						Aftph	0.591661	5.80418e-33		Pfdn1	0.46254	3.76083e-22						Dusp6	0.394208	5.57505e-17						Tbc1d8	0.323297	6.79602e-15
Cnot6l	0.516411	2.39398e-66										Maf	0.437559	4.51302e-65						Jak2	0.667387	6.13941e-33		Tmem154	0.269284	4.26369e-22						Rpl13a	0.440962	5.70638e-17						Extl3	0.439515	7.02048e-15
Daam1	0.483218	2.6169e-66										Chmp1b	0.307115	7.32198e-65						Eif5b	0.510483	6.92595e-33		Myo18a	0.476716	4.36269e-22						Rps7	0.477225	5.9241e-17						Gm15987	0.590957	7.14042e-15
Rad51b	0.619145	2.96798e-66										Ccdc71l	0.524282	1.37878e-64						Spata5	0.533664	7.37759e-33		Pepd	0.427483	4.63259e-22						Rpl15	0.435455	6.16091e-17						Pdzrn3	1.42401	7.64814e-15
Lnx2	0.262729	3.64628e-66										Sf3b6	0.466538	2.32304e-64						Katnbl1	0.573616	7.39907e-33		Srgap1	0.303614	4.94867e-22						Cpeb3	0.29729	6.53305e-17						Prrc2b	0.488179	7.92009e-15
Rpl27	0.494796	3.64902e-66										Klhl18	0.271189	3.77529e-64						Trip12	0.522868	7.54075e-33		Sptlc1	0.298947	6.51574e-22						Strip1	0.266417	6.79403e-17						Nemf	0.517149	8.50773e-15
Mrps14	0.30112	4.2602e-66										Nt5c	0.253909	4.31817e-64						Hook1	0.345599	8.28321e-33		Peli1	0.610067	7.30552e-22						Slc6a14	0.467119	6.81279e-17						Srsf4	0.479328	9.00294e-15
Neo1	0.294614	4.46387e-66										Rpl10	0.489152	1.00257e-63						Lrch1	0.607082	8.51255e-33		Ptpn3	0.404432	1.64003e-21						Ppp2r5e	0.405491	8.53068e-17						Nup98	0.547782	1.0331e-14
Trp53	0.311135	7.00816e-66										Pcdh1	0.258358	1.62156e-63						Ccnl1	0.504417	9.05819e-33		Ier2	0.52248	1.65017e-21						Map3k20	0.417448	8.7091e-17						Memo1	0.520615	1.03854e-14
Atp5b	0.478263	1.04766e-65										Akirin1	0.544974	2.12395e-63						Taf1d	0.52242	1.31998e-32		Spire1	0.57297	5.48231e-21						Casp14	0.280748	8.81298e-17						Notch1	0.502873	1.04304e-14
L3mbtl3	0.321311	1.06845e-65										Larp1b	0.277782	3.34048e-63						Dyrk1a	0.541369	1.50625e-32		Thrb	0.315534	7.49706e-21						Tanc1	0.409136	9.03971e-17						Kdm3b	0.446197	1.18695e-14
Slc25a5	0.462733	1.40968e-65										Llph	0.439235	3.37569e-63						Sap130	0.552691	1.5075e-32		Map4k5	0.438924	8.03701e-21						Tob1	0.378584	1.07431e-16						Ilf2	0.478105	1.27686e-14
Hnrnpd	0.481733	2.50359e-65										Acaca	0.419354	4.18823e-63						Lypd3	0.504594	1.53265e-32		Mprip	0.42978	9.90086e-21						Pim3	0.346044	1.27743e-16						Rreb1	0.34438	1.36085e-14
Xpo7	0.377703	4.02988e-65										Slc35f5	0.289896	5.62764e-63						Cnot1	0.586932	1.62515e-32		Xpnpep1	0.498168	1.0061e-20						Csrp1	0.406652	1.27994e-16						Mapkbp1	0.379013	1.37153e-14
Zfp609	0.412647	4.28548e-65										Prdx5	0.459043	6.23434e-63						Kdm5b	0.57328	1.77325e-32		Ccdc124	0.305575	1.01656e-20						Zfp410	0.287935	1.32459e-16						Usp37	0.567629	1.40621e-14
Ptprg	0.401235	4.36829e-65										Cldnd1	0.398773	6.86089e-63						Cd109	0.52417	1.9953e-32		Ppm1d	0.317602	1.14539e-20						Rpl4	0.454464	1.37377e-16						Serinc2	0.406525	1.44719e-14
Vcl	0.626193	1.27174e-64										Bcl2l13	0.267196	8.57969e-63						Wdr36	0.459815	2.19476e-32		Cln8	0.374278	1.48233e-20						Acadm	0.281925	1.73224e-16						Il13ra1	0.601071	1.51206e-14
Smad1	0.463001	1.38541e-64										Mill1	0.325883	9.36478e-63						Clip1	0.639154	2.37183e-32		Dcun1d3	0.401554	1.4857e-20						Sun2	0.254237	1.80918e-16						Pptc7	0.43502	1.64673e-14
Supt16	0.401496	1.79903e-64										Acsl5	0.291	1.13449e-62						Pafah1b1	0.529812	3.12117e-32		Pkib	0.284394	4.09011e-20						Baiap2	0.327153	1.93029e-16						Phlpp1	0.372278	1.68546e-14
Lrba	0.344152	2.09249e-64										Anxa7	0.490172	2.36973e-62						Hsdl2	0.463324	3.91417e-32		Abcd3	0.506786	4.56939e-20						Emc8	0.27687	2.21142e-16						Sik2	0.569115	1.6907e-14
Dut	0.274848	2.49571e-64										Lrba	0.351407	2.43612e-62						Vkorc1l1	0.575664	4.16059e-32		Ctsh	0.449429	5.07016e-20						Rad23b	0.454443	2.50423e-16						Epn2	0.421305	1.82156e-14
Aatf	0.285758	2.54109e-64										4833439L19Rik	0.341254	2.70796e-62						Ppp2r3a	0.554454	4.25826e-32		Maff	0.410416	5.75241e-20						AC149090.1	0.307557	2.76277e-16						Naa16	0.482406	1.84002e-14
Snrpf	0.400011	3.15207e-64										Hace1	0.306688	2.95778e-62						Smox	0.447433	4.83323e-32		Spryd7	0.303239	6.1526e-20						Vkorc1l1	0.43659	3.019e-16						Tlk1	0.506364	1.92166e-14
Psme2	0.374113	3.78052e-64										Rpl9-ps6	0.348451	4.80639e-62						Epcam	0.402833	5.57806e-32		Glrx2	0.347045	7.65516e-20						Atf6	0.486889	3.11126e-16						Ecpas	0.462157	1.95116e-14
Arntl	0.450521	4.30227e-64										Rab40c	0.312942	6.71016e-62						Myo1d	0.490702	6.11782e-32		Dbnl	0.41209	9.08097e-20						Atg3	0.328792	3.30155e-16						Arntl	0.518019	2.18255e-14
Tra2b	0.544448	4.65877e-64										Mcc	0.411099	6.92934e-62						Car13	0.487874	6.17995e-32		Kank1	0.304562	1.32536e-19						Trp53bp2	0.409967	3.50057e-16						Stau1	0.550482	2.20286e-14
Eif4b	0.456575	6.32409e-64										Phtf2	0.392977	7.00691e-62						Pdpk1	0.549476	6.49445e-32		Sema3d	0.314809	1.59619e-19						Retreg3	0.333913	3.58146e-16						Mob2	0.434435	2.37971e-14
Arhgap21	0.499898	1.12276e-63										Vat1	0.425314	9.90298e-62						Snrk	0.552198	7.51904e-32		Grk2	0.414343	1.61633e-19						Ubap2	0.404878	3.62066e-16						Med13	0.485231	2.81991e-14
Clcn3	0.353923	1.24446e-63										Cdcp1	0.299183	2.19418e-61						Gadl1	0.524166	8.76407e-32		Tmem50b	0.277389	1.61981e-19						Avpi1	0.427628	3.95617e-16						R3hdm1	0.478746	3.23853e-14
Pik3cb	0.47188	1.78485e-63										Atl2	0.444216	2.59979e-61						Ovol1	0.406384	1.06304e-31		2008-09-01	0.359922	1.84462e-19						Lsg1	0.289299	4.0324e-16						Mfhas1	0.536204	3.62917e-14
Larp1b	0.308571	1.79023e-63										Neo1	0.285199	2.7031e-61						Tgfa	0.47446	1.0645e-31		Crybg1	0.463674	2.08209e-19						Serpinb8	0.370434	4.07823e-16						Ythdf3	0.441824	3.74625e-14
Cnot2	0.495566	2.36403e-63										Ssbp2	0.421514	4.27398e-61						E130308A19Rik	0.535517	1.33067e-31		Chmp2a	0.483767	2.10059e-19						Ubr5	0.505697	4.31897e-16						Hnrnpu	0.413019	3.97392e-14
Tbl1x	0.517872	2.83502e-63										Garem1	0.299531	7.77995e-61						Zfp148	0.597089	1.34889e-31		Shb	0.386922	2.11746e-19						Rps19	0.437909	4.85819e-16						Dyrk1a	0.470136	4.04415e-14
Snrk	0.302443	4.07713e-63										Rpl35	0.485392	8.84174e-61						Rev3l	0.693838	1.46149e-31		Garem1	0.350885	2.25455e-19						Fryl	0.421535	5.06723e-16						Skp1a	0.5177	4.94821e-14
Tubb4b	0.488602	5.13679e-63										Sec24a	0.505084	9.74474e-61						Hspa4	0.483316	1.48252e-31		Gadd45b	0.40837	2.9726e-19						Usp3	0.502409	5.21599e-16						Akap9	0.412899	4.97385e-14
Atp1a1	0.540107	6.53501e-63										Dnmbp	0.375157	1.50074e-60						Ppfia1	0.524851	1.49199e-31		Ech1	0.306108	4.04267e-19						Mical2	0.310851	5.32474e-16						Foxj3	0.487613	5.12313e-14
Cct4	0.381629	8.27602e-63										Galnt7	0.318143	1.56215e-60						Fnip1	0.473646	1.65059e-31		Pou3f1	0.331543	5.5216e-19						Ppm1d	0.298687	5.41194e-16						Sesn1	0.612002	5.17111e-14
Ilf3	0.323179	1.27698e-62										Ndufa4l2	0.672243	2.10322e-60						Exoc5	0.551488	2.37217e-31		Arrdc4	0.42368	5.58091e-19						Atp8b1	0.335051	5.69202e-16						Abl2	0.49594	5.37207e-14
Csrp1	0.507491	1.4731e-62										Edf1	0.473652	2.10914e-60						Ahcyl1	0.490495	3.04034e-31		Rars	0.362109	7.7988e-19						Cox7a2l	0.374565	5.70583e-16						Laptm4b	0.379427	5.56754e-14
Hmgn2	0.273574	1.95773e-62										Phactr2	0.545599	3.26782e-60						Csnk1g1	0.566949	3.10415e-31		Ralgps2	0.400479	8.1049e-19						Tnpo3	0.379903	6.18318e-16						Myo6	0.392628	5.64617e-14
Atl2	0.380301	2.16235e-62										Stfa3	0.885847	4.54878e-60						Trip11	0.521973	3.15101e-31		Acvr2a	0.331499	9.50051e-19						Ppm1b	0.432548	6.4235e-16						Wac	0.599865	6.52273e-14
Anxa1	0.552852	2.9171e-62										Ctnna1	0.542517	5.82332e-60						Naa50	0.551007	3.6454e-31		Tiam1	0.377227	1.19174e-18						Hmgn1	0.370606	6.45478e-16						Lrch3	0.52951	6.81025e-14
Slc20a2	0.289387	3.79008e-62										Atg13	0.329754	7.49669e-60						Gigyf2	0.639185	3.8103e-31		Gng12	0.402252	1.25398e-18						Usp38	0.28151	7.01495e-16						Paics	0.330336	7.11434e-14
Spata5	0.298687	4.36177e-62										Chchd2	0.449856	7.76133e-60						Azin1	0.62329	3.83412e-31		Hdgf	0.442128	2.02785e-18						Nt5c3	0.258518	7.35962e-16						Fam193b	0.342331	7.21781e-14
Acvr1	0.380245	5.02992e-62										Pawr	0.326542	8.73972e-60						Hnrnpd	0.527695	4.82968e-31		Ambra1	0.452695	2.62419e-18						Bcar1	0.263493	7.38046e-16						Zranb1	0.496145	7.4153e-14
Prpf8	0.263133	5.06028e-62										Arpc1a	0.411238	9.19426e-60						Hnrnpdl	0.472415	5.23559e-31		Fasn	0.270106	3.33165e-18						H2-Q7	0.398166	8.02235e-16						Cd2ap	0.385853	7.55433e-14
Ctdspl	0.317701	5.23999e-62										Mdh1	0.315002	1.06032e-59						Frs2	0.569807	5.54419e-31		Adgrl3	0.28048	3.6362e-18						Fam129b	0.39517	8.21644e-16						Ylpm1	0.364857	7.69887e-14
Ttc37	0.350582	5.50233e-62										2610035D17Rik	0.445838	1.62779e-59						Tab3	0.364908	5.66096e-31		Ifrd1	0.289812	5.21491e-18						Ldlr	0.455915	8.5328e-16						Prkci	0.428059	7.98372e-14
Arpp19	0.432379	6.09649e-62										Sowahc	0.367767	2.07053e-59						Deptor	0.510275	6.30199e-31		Apoc1	0.40403	5.95841e-18						Il17rc	0.260857	9.08581e-16						Son	0.352193	8.09457e-14
Rtf1	0.418547	7.90575e-62										Il13ra1	0.503687	2.12159e-59						Arl8b	0.535475	6.66753e-31		Dennd2c	0.365481	7.17289e-18						Lin7c	0.282854	1.00249e-15						Upf3b	0.405746	8.46436e-14
Ubac2	0.37928	1.28444e-61										Rora	0.41315	6.04622e-59						Mtmr3	0.516925	6.69781e-31		Usp7	0.432697	7.27712e-18						Cat	0.290351	1.01303e-15						Rps6ka3	0.523817	8.49396e-14
Tanc1	0.388501	1.51415e-61										Fhit	0.275524	8.83357e-59						Clk1	0.485472	7.16086e-31		Abhd17c	0.284325	7.68121e-18						Lemd3	0.461076	1.22205e-15						Afap1l2	0.414497	9.31837e-14
Bcar3	0.359875	1.71264e-61										Eif2s2	0.443655	9.05768e-59						Pkn2	0.501013	8.5765e-31		Anxa8	0.563596	7.88791e-18						Gan	0.308599	1.31744e-15						Nek7	0.607218	9.72944e-14
Hspd1	0.405843	1.87378e-61										Efnb2	0.315896	1.00205e-58						Ghr	0.672984	1.19226e-30		Uqcc2	0.390238	8.36094e-18						Ap1ar	0.288825	1.52045e-15						Pard3b	0.672335	1.06054e-13
Wasl	0.43706	2.68715e-61										Polr2f	0.369544	1.00474e-58						Ube3a	0.513327	1.31748e-30		2310022B05Rik	0.274293	9.93282e-18						Rps18	0.443827	2.15246e-15						Yeats2	0.341358	1.16539e-13
Orc4	0.255255	2.74107e-61										Rpl24	0.443067	1.17794e-58						Scap	0.498581	1.33799e-30		Cyb5r4	0.311181	1.11642e-17						Smad1	0.455048	2.21372e-15						Wwox	0.731493	1.19229e-13
Fkbp4	0.299105	2.88143e-61										Tom1l2	0.450491	1.72763e-58						Mink1	0.513447	1.396e-30		Mbtd1	0.42894	1.26732e-17						Anxa1	0.447301	2.42291e-15						Fam193a	0.509763	1.29322e-13
Maoa	0.35272	3.04887e-61										Rpl22l1	0.520105	3.44916e-58						Smg6	0.535222	1.55936e-30		Hook3	0.457058	1.29573e-17						Gapvd1	0.392401	2.42929e-15						Arid2	0.42575	1.32144e-13
Maml3	0.47503	3.61593e-61										Slc39a6	0.323188	3.77915e-58						Pak3	0.760454	1.74139e-30		Cul3	0.662954	1.47853e-17						Zdhhc3	0.42047	2.91838e-15						Ambra1	0.481205	1.33338e-13
Wwtr1	0.502568	3.82303e-61										Psmc5	0.30918	4.10294e-58						Zc3h12c	0.725949	1.75572e-30		Psmc5	0.404989	1.64228e-17						Brd7	0.290366	3.04411e-15						Ybx3	0.339001	1.37989e-13
Ssrp1	0.274273	3.88016e-61										Hmg20b	0.315004	5.21206e-58						4932438A13Rik	0.571797	2.28839e-30		Tmed5	0.471187	2.08417e-17						Actr1a	0.369226	3.09145e-15						Lifr	0.508878	1.52262e-13
Ncor2	0.318299	4.60574e-61										Mink1	0.279494	5.81435e-58						Zdhhc5	0.503336	2.69477e-30		Krt79	1.73027	2.94768e-17						Wdr20	0.351142	3.38576e-15						Arhgap10	0.286372	1.53814e-13
Hist1h1e	0.487553	7.57506e-61										Ptpn21	0.299083	6.11786e-58						Mia2	0.548657	2.869e-30		Slc9a3r1	0.268983	3.92557e-17						Dgcr6	0.268217	3.4814e-15						Mycbp2	0.458646	1.65867e-13
Kat7	0.27034	7.89123e-61										Ppp2r3a	0.486461	9.0396e-58						Ccnt2	0.544336	3.16856e-30		Pex13	0.295118	4.22351e-17						Oxr1	0.289573	3.49281e-15						Rtn4	0.477142	1.6671e-13
Ola1	0.291761	1.10614e-60										Dgka	0.250356	2.63706e-57						Tial1	0.581917	5.16797e-30		Dlgap4	0.452014	4.95644e-17						Parl	0.283453	3.52607e-15						Ankhd1	0.473575	1.72296e-13
Rasa1	0.387512	1.11464e-60										Ipmk	0.349411	3.40628e-57						Ap1g1	0.507832	5.2491e-30		Gtf2f2	0.396599	5.16159e-17						Pum1	0.461899	3.97922e-15						Sap130	0.508772	1.85585e-13
Zfp266	0.263203	1.27312e-60										Tsc22d2	0.596769	4.12744e-57						Usp32	0.590086	5.69218e-30		Baiap2	0.348034	5.70624e-17						Tent4b	0.436609	4.12052e-15						Helz	0.429695	1.87564e-13
Prkar2a	0.271471	1.32325e-60										Map3k20	0.484658	4.89576e-57						Taf4	0.32866	6.13155e-30		Jun	0.488788	9.94688e-17						Tmed9	0.3325	4.64465e-15						Rcor1	0.502196	1.93957e-13
Igsf8	0.262854	1.3297e-60										Psmd7	0.432041	9.47993e-57						Rbm6	0.529058	6.85912e-30		Fis1	0.427269	1.03207e-16						Kctd3	0.256972	4.90749e-15						Smc3	0.394768	2.27562e-13
H2afv	0.493242	1.49807e-60										Tprgl	0.331823	9.78123e-57						Fus	0.528363	7.84337e-30		Dock9	0.290045	1.12068e-16						Mink1	0.26546	5.18805e-15						Atad2	0.472135	2.44898e-13
Il6ra	0.266722	3.07267e-60										Tmem134	0.365134	1.10207e-56						Ankrd13c	0.520019	8.45186e-30		Mid2	0.381252	1.28415e-16						Ahcyl1	0.447041	5.31464e-15						Mtrex	0.430763	2.6299e-13
Ranbp1	0.37636	4.47706e-60										Prdx2	0.465067	8.02028e-56						Gxylt1	0.503012	8.69057e-30		Traf6	0.356466	1.49438e-16						Atp2a2	0.378046	5.39729e-15						Adarb1	0.439698	2.67792e-13
Mdh1	0.300651	5.65413e-60										Defb6	0.379788	1.18152e-55						Prpf38b	0.498936	8.97844e-30		Tmem134	0.382711	1.66976e-16						Bag4	0.26019	5.79622e-15						Peli1	0.460642	2.78916e-13
Usp47	0.529501	5.74662e-60										Vps36	0.27109	1.33342e-55						Met	0.488069	9.38778e-30		Nt5c3	0.60551	1.76805e-16						Akap11	0.373579	6.27566e-15						Acvr1b	0.369689	3.00584e-13
Cbfa2t2	0.295346	6.29777e-60										Aggf1	0.301283	1.33941e-55						Kifc3	0.598858	9.43782e-30		Zswim4	0.432032	2.17149e-16						Ola1	0.28476	6.46054e-15						Fbxw11	0.433863	3.07872e-13
Srsf1	0.320604	8.58873e-60										Klf3	0.363631	1.38542e-55						Cdc37l1	0.466905	9.72497e-30		Per1	0.253453	2.37873e-16						Ubqln1	0.333355	6.67435e-15						Arid5b	0.36283	3.25337e-13
Gspt1	0.448749	9.21242e-60										Golga4	0.456241	1.43238e-55						Shtn1	0.40274	1.14263e-29		Noct	0.45558	3.72288e-16						Rarg	0.390998	7.09443e-15						Rgs12	0.399872	3.64025e-13
Nfx1	0.285683	9.35691e-60										Afdn	0.328229	1.48905e-55						Cmip	0.373445	1.32218e-29		Retreg3	0.404796	3.79512e-16						Vps13a	0.39323	7.2806e-15						Exoc4	0.467271	3.67378e-13
Uck2	0.410111	1.01875e-59										Map3k8	0.389718	1.80079e-55						Wnt4	0.380605	1.46641e-29		Cnot6l	0.532645	4.03884e-16						Pkp4	0.511002	7.44637e-15						Ppp2r5e	0.497483	3.91772e-13
Focad	0.263062	1.24964e-59										Ammecr1	0.360453	2.04312e-55						Elf1	0.570389	1.52624e-29		Dgcr6	0.259526	4.21908e-16						9530026P05Rik	0.387723	7.70886e-15						Nedd4	0.313157	4.09896e-13
Chl1	0.317912	1.53833e-59										Pa2g4	0.296645	3.67975e-55						Lipm	0.368583	1.60813e-29		Foxo3	0.369625	4.2303e-16						Ppdpf	0.282041	8.94228e-15						Deptor	0.485041	4.18555e-13
Sgms1	0.696763	2.15127e-59										Atf3	0.575206	4.3697e-55						Crim1	0.749246	1.80005e-29		Mapk3	0.396057	4.53001e-16						Pptc7	0.33045	9.26698e-15						Bdp1	0.48937	4.26961e-13
Atp1b3	0.495551	2.91185e-59										Tollip	0.387485	4.38908e-55						Neo1	0.511895	1.80985e-29		Ube2d3	0.501998	4.56397e-16						Camsap1	0.311066	9.67915e-15						Epb41	0.432578	5.35899e-13
Kif21a	0.301633	2.95843e-59										Sprr2a3	0.604535	6.40906e-55						AA986860	0.476889	1.84299e-29		Wipi2	0.49265	4.97641e-16						Trp53inp1	0.287671	9.91219e-15						Micu3	0.446618	5.52838e-13
Hdgfl3	0.251849	2.98577e-59										Eif3h	0.461179	1.60142e-54						Rasgef1b	0.486701	1.8995e-29		Chmp1b	0.272559	5.41012e-16						Nos1ap	0.258651	1.04399e-14						Usp3	0.596061	5.67559e-13
Fam133b	0.302128	4.01709e-59										Ndufa12	0.309595	1.87751e-54						Ddx46	0.502293	2.38123e-29		Cs	0.443553	6.49049e-16						Rps2	0.425389	1.05195e-14						Akap11	0.487648	5.86624e-13
Prpf4b	0.360151	4.64778e-59										Kif5b	0.439216	1.92436e-54						Tanc2	0.620024	2.40344e-29		Scamp1	0.406384	6.6e-16						Slc6a8	0.278384	1.09361e-14						Tnpo1	0.48763	5.95118e-13
Larp1	0.435195	5.32959e-59										Bscl2	0.292912	2.58204e-54						Camta1	0.544852	2.50817e-29		Micos13	0.432158	7.98926e-16						Cltb	0.318689	1.10837e-14						Rapgef6	0.493811	6.25553e-13
Snrpd1	0.33711	5.5805e-59										Ndufa10	0.273389	2.68857e-54						Nemf	0.550455	2.65358e-29		Bscl2	0.307445	8.38935e-16						Hnrnpul2	0.321329	1.15908e-14						Rasa1	0.469217	6.36786e-13
Hacd3	0.264887	5.62325e-59										Lmbrd2	0.303468	5.13234e-54						Ankrd35	0.354043	2.95707e-29		Pdcd4	0.378314	8.91168e-16						Camsap2	0.40097	1.17878e-14						Osmr	0.471975	6.40127e-13
Dhx15	0.436177	6.05927e-59										Arl5b	0.447834	7.73843e-54						Tead3	0.368496	2.98524e-29		Rab24	0.299867	1.05827e-15						Rpl8	0.407314	1.21966e-14						Exoc6b	0.463799	6.59175e-13
Cdk19	0.489626	6.23905e-59										Tcerg1	0.419622	7.9576e-54						Bdp1	0.528897	3.55892e-29		Map2k2	0.477655	1.06742e-15						Hacd2	0.393938	1.27226e-14						Fmr1	0.436678	7.03064e-13
Rarg	0.269866	9.14422e-59										Ndufa4	0.377793	1.14217e-53						Atxn2	0.562934	4.28537e-29		Fry	0.275553	1.51147e-15						Cd109	0.3946	1.3489e-14						Baz1b	0.406822	7.34752e-13
Ubap2	0.375644	1.11513e-58										Abcd3	0.311543	1.68079e-53						Skint6	0.863921	4.88537e-29		Mtmr1	0.355007	1.60984e-15						Abcf1	0.351517	1.46628e-14						Ints7	0.416607	7.45852e-13
Hnrnpu	0.441315	1.20202e-58										Gm2000	0.402828	1.73492e-53						Parp8	0.737373	5.31842e-29		Ppp1r13b	0.324894	3.10502e-15						Rpl22	0.384587	1.53721e-14						Ccny	0.501939	7.64585e-13
Atp5j2	0.433919	1.41779e-58										Arf6	0.358509	1.79112e-53						Zc3hav1	0.482034	5.93301e-29		Maoa	0.423995	3.25278e-15						Ndufa4	0.35955	1.5414e-14						Srsf2	0.447841	7.66976e-13
Rps28	0.461296	2.12744e-58										Csnk2a2	0.363966	2.68733e-53						Map4k3	0.45074	7.15571e-29		Olr1	0.266758	5.09583e-15						Zfp266	0.321621	1.63575e-14						Suco	0.317429	7.96844e-13
Lnpep	0.531486	2.1978e-58										Zfyve9	0.348802	2.94458e-53						Arhgap42	0.413654	7.67251e-29		Bok	0.255464	6.24986e-15						Ikzf2	0.340111	1.63623e-14						Ubp1	0.459408	8.13615e-13
Cs	0.396669	2.25004e-58										Ndfip2	0.448048	3.51573e-53						Cab39	0.536229	9.21363e-29		Zranb1	0.504523	6.28765e-15						Ube2h	0.499655	1.91017e-14						Ppp1cb	0.53438	1.09816e-12
Phtf2	0.362764	2.55649e-58										Nfe2l1	0.41431	5.09595e-53						Kcmf1	0.492377	9.29449e-29		Atox1	0.391733	6.52388e-15						Laptm4b	0.356336	2.0579e-14						Supt20	0.411594	1.32049e-12
Cox4i1	0.426761	3.59787e-58										Eif1ax	0.36843	5.95372e-53						Ppp4r3a	0.504561	9.74639e-29		Mob2	0.347025	6.63389e-15						Amd1	0.343235	2.20433e-14						Appbp2	0.482962	1.38668e-12
Kdm6a	0.482529	4.82765e-58										Ttc37	0.280668	6.06877e-53						Map3k3	0.498544	1.12924e-28		Trp53inp2	0.354208	8.00776e-15						Srpk1	0.33595	2.24462e-14						Usp31	0.384005	1.4402e-12
Bcas2	0.304259	5.40425e-58										Amotl1	0.280949	8.92114e-53						Nfix	0.478829	1.24183e-28		Cd82	0.289409	9.47954e-15						Limk2	0.253391	2.25841e-14						Dcaf6	0.47387	1.45926e-12
Sfr1	0.460888	5.54348e-58										Ube2q2	0.522592	1.21738e-52						Krt5	0.470533	1.4491e-28		Ddi2	0.350693	9.51063e-15						Polb	0.384625	2.3466e-14						Smc1a	0.43101	1.4722e-12
Hsp90ab1	0.422128	6.27336e-58										Cobll1	0.299627	1.33702e-52						Ezh2	0.53228	1.62703e-28		Fam114a2	0.315941	1.02694e-14						Rpl10a	0.434847	2.70075e-14						Prpf39	0.472398	1.55167e-12
Pcdh7	0.468038	9.87348e-58										Fam114a2	0.293738	2.0653e-52						Ankfy1	0.472876	1.85198e-28		Cnksr3	0.323724	1.04133e-14						Slc26a2	0.263871	2.86608e-14						Tmem65	0.5045	1.75154e-12
Osbpl3	0.293817	1.11281e-57										Mpc2	0.321701	2.07937e-52						Rps6kb1	0.520354	1.86318e-28		Pdhb	0.306546	1.11584e-14						Rab10	0.352729	2.94801e-14						Usp15	0.385522	1.75521e-12
Nol7	0.271192	1.61843e-57										Nop53	0.465687	2.6148e-52						Gpbp1l1	0.457266	1.87432e-28		Ube2r2	0.564535	1.19446e-14						Tmcc3	0.310474	3.4487e-14						Wwtr1	0.404812	1.79243e-12
Snrnp48	0.251225	1.94849e-57										Gramd3	0.361072	3.01802e-52						Nfib	0.456108	1.99203e-28		Tom1	0.321904	1.2834e-14						Zranb1	0.355894	3.61583e-14						Foxp4	0.456608	2.09527e-12
Ndfip2	0.459792	2.16838e-57										Chmp5	0.344827	5.94171e-52						Slc44a1	0.545961	2.44115e-28		Rab3d	0.295994	2.33803e-14						Rps8	0.382116	3.62217e-14						Stat3	0.641754	2.36689e-12
Cdk6	0.482552	2.27177e-57										Nr6a1	0.393851	6.1966e-52						Tom1l2	0.644472	2.79863e-28		Grpel1	0.287508	3.54836e-14						Sik1	0.366298	3.92888e-14						Rab6a	0.48969	2.44777e-12
Tent5a	0.380071	3.17351e-57										Scamp1	0.412388	9.84036e-52						Arhgef3	0.672707	3.90759e-28		Arl5a	0.402103	4.61355e-14						Med4	0.251665	3.95028e-14						Zfp654	0.543671	2.51694e-12
Ttc3	0.390755	3.4511e-57										Eif3g	0.286309	1.01195e-51						Crybg1	0.509268	4.3236e-28		Ctsd	0.283269	5.96658e-14						Ptpra	0.485561	4.25968e-14						Zfr	0.471508	2.53513e-12
Tgfbi	0.37683	3.66253e-57										Ripk2	0.31958	1.04701e-51						Map3k1	0.520556	4.35093e-28		Dennd1b	0.494638	6.22439e-14						Eif6	0.368027	4.42998e-14						Smad5	0.322404	2.53693e-12
Stat1	0.296391	4.68844e-57										Wdr43	0.315944	1.86057e-51						Ppp1r13l	0.318062	4.88958e-28		Hsdl2	0.312365	7.27487e-14						Micos13	0.345114	4.496e-14						Hnrnph1	0.408263	2.68226e-12
Eif3l	0.301352	5.56879e-57										Mark2	0.450079	3.75478e-51						mt-Nd4l	0.471391	5.13716e-28		Hagh	0.275811	8.70949e-14						Senp6	0.406394	4.61219e-14						Tjp1	0.438997	2.80085e-12
Atpif1	0.463732	5.99151e-57										Cst3	0.301307	4.11812e-51						G3bp1	0.554697	5.14437e-28		F11r	0.358737	9.50147e-14						Fkbp4	0.290425	4.91962e-14						Acbd5	0.49229	2.80921e-12
Tkt	0.386239	6.22607e-57										Ccl27a	0.717972	1.09934e-50						Kansl1	0.50645	5.86245e-28		Slk	0.457566	1.02861e-13						Mtch2	0.302686	5.11889e-14						Dock9	0.374186	2.90705e-12
Atp5g1	0.42271	6.31186e-57										Pgls	0.373142	1.21739e-50						Fhl2	0.545261	7.84084e-28		Mapre2	0.316044	1.13318e-13						Naa30	0.254392	5.20592e-14						Cnot2	0.590789	2.94352e-12
Senp6	0.449927	6.50861e-57										Sars	0.26528	1.88554e-50						Trappc10	0.44078	8.61114e-28		Chmp5	0.362661	1.19209e-13						Sucla2	0.263807	5.67744e-14						Paxbp1	0.331226	3.34967e-12
Phactr2	0.577349	6.7601e-57										Oxct1	0.354077	2.38918e-50						Ube2d2a	0.518853	8.73731e-28		Cstb	0.287616	1.20327e-13						Ap1b1	0.30398	6.569e-14						Lrp5	0.347841	3.3497e-12
Skp1a	0.387029	7.57089e-57										Bcas2	0.315417	3.861e-50						Lnx2	0.43895	8.74367e-28		Zc3h15	0.327745	1.48955e-13						Capn1	0.250849	8.3001e-14						Carmil1	0.42362	3.35333e-12
Rpl41	0.421472	1.26898e-56										Tanc1	0.357914	1.20866e-49						Uty	0.487709	9.2549e-28		H2-T22	0.293057	2.04343e-13						Eif3j1	0.339192	8.78016e-14						Ctnnb1	0.364058	4.4064e-12
Lnpk	0.267903	1.34605e-56										Znrf3	0.294694	2.71726e-49						Celf1	0.580957	9.66398e-28		Ubl3	0.664884	2.07524e-13						Eif1ad	0.280935	9.47124e-14						Mapk14	0.37959	4.44485e-12
Slain2	0.421034	1.3839e-56										Cramp1l	0.357302	3.30716e-49						Tollip	0.494094	9.9596e-28		Smap2	0.420998	2.1045e-13						Ube2v2	0.251983	9.68586e-14						Dcbld1	0.425101	4.45262e-12
Selenoh	0.256856	1.63643e-56										Gsto1	0.296656	3.72668e-49						Gpr87	0.258998	1.01209e-27		Phactr4	0.392883	2.108e-13						Arhgap12	0.391706	9.85125e-14						Aqp3	0.288479	4.50756e-12
Abcf1	0.347505	2.1216e-56										Pdap1	0.336272	4.93059e-49						Adgrf4	0.432334	1.24999e-27		Golga4	0.442026	2.15311e-13						Mdh1	0.371847	9.86164e-14						Mpp6	0.529299	4.8105e-12
Eif3f	0.454522	2.20058e-56										Ccdc6	0.313696	6.54445e-49						Orc4	0.429343	1.32627e-27		Fam129b	0.337854	2.26562e-13						Kif5b	0.363883	1.08076e-13						Arl4a	0.400859	5.54937e-12
Srsf3	0.457767	2.22328e-56										Senp2	0.438492	6.6643e-49						Scaf8	0.511008	1.35789e-27		Srgap2	0.380303	2.28791e-13						Mob4	0.342601	1.18804e-13						Hmbox1	0.493169	5.67718e-12
Ubxn7	0.434031	2.25818e-56										Eif3m	0.355993	6.76483e-49						Snx5	0.503926	1.9679e-27		Fgfbp1	0.336399	3.49842e-13						Znrf3	0.312019	1.37786e-13						Ppp4r3a	0.419439	5.9631e-12
Fubp1	0.473614	3.37447e-56										Lmo7	0.340547	1.11401e-48						Sf3b3	0.476125	2.10986e-27		Mon2	0.346275	3.58077e-13						Kif1b	0.382496	1.42167e-13						Nck2	0.417663	6.77543e-12
Arhgap32	0.32776	3.45558e-56										Ivns1abp	0.301821	1.58209e-48						Snd1	0.506557	2.24492e-27		Tjp1	0.324815	5.22716e-13						Xpo7	0.349971	1.53796e-13						Utrn	0.346606	7.17956e-12
Tmem41b	0.25429	3.55278e-56										Vkorc1l1	0.309239	2.94558e-48						Vapa	0.56017	2.5689e-27		Tollip	0.357474	5.98833e-13						Foxo1	0.320371	1.6373e-13						Csnk1g1	0.454881	7.291e-12
Abce1	0.259869	4.15066e-56										Abcf1	0.366784	4.66555e-48						Plekha1	0.464319	2.65897e-27		Cope	0.361995	6.20154e-13						Slc25a17	0.273604	1.65378e-13						Tbl1x	0.486896	7.65239e-12
Camta1	0.426033	4.58691e-56										Tmem87a	0.294313	5.27598e-48						Aopep	0.550727	2.83039e-27		Prrc1	0.251637	6.64489e-13						Nav2	0.365635	1.71898e-13						Bptf	0.397248	7.83599e-12
Ndufb6	0.299487	6.02529e-56										Tjp1	0.373585	7.12726e-48						Btbd3	0.432844	2.83227e-27		Chchd2	0.303655	7.25704e-13						Ralgapa2	0.384011	1.79199e-13						Scaf4	0.429631	8.43471e-12
Smc2	0.420417	6.59798e-56										Mrps14	0.280134	1.0874e-47						Atad2b	0.522728	3.12298e-27		Endod1	0.316857	7.4033e-13						Naca	0.382882	1.89213e-13						Ddx10	0.453562	8.49677e-12
Rev3l	0.446822	7.07158e-56										Pld3	0.269173	1.52561e-47						Wasf2	0.511114	3.21729e-27		Paip2	0.373497	8.39677e-13						Relch	0.362271	1.95004e-13						Pnn	0.332042	8.67558e-12
Hnrnpa2b1	0.466488	7.266e-56										Bmpr1a	0.296929	1.90842e-47						Serpinb8	0.514514	3.31275e-27		Ldlr	0.372916	1.09233e-12						Kat6a	0.361452	2.1757e-13						Dcaf5	0.405175	1.01969e-11
Scyl2	0.293249	7.8906e-56										Chmp2b	0.25741	2.73029e-47						Scaf4	0.536578	3.77845e-27		Hectd1	0.345198	1.75692e-12						Tmem87a	0.310297	2.25228e-13						Tuft1	0.310351	1.08107e-11
Stt3b	0.405012	8.21248e-56										Rab10	0.482473	5.67867e-47						Vps54	0.462236	3.94538e-27		Tpm2	0.385886	2.53227e-12						Bcl2l13	0.280683	2.29264e-13						Gigyf2	0.444275	1.08884e-11
Sik1	0.387177	8.28147e-56										Syne2	0.343615	6.25243e-47						Atrx	0.563321	4.2342e-27		Jund	0.330906	3.22013e-12						Ctif	0.34796	2.63653e-13						Chd4	0.382761	1.16146e-11
Itpr2	0.421713	8.68121e-56										Ndufb9	0.392972	6.59101e-47						Sult5a1	0.420498	4.79995e-27		Leprotl1	0.277125	3.64675e-12						Pan3	0.380327	2.91219e-13						Tfap2c	0.295093	1.19472e-11
Scaf4	0.356672	9.49881e-56										Ier2	0.367319	8.12728e-47						L3mbtl3	0.475972	4.88212e-27		Faf1	0.325417	3.94668e-12						Acvr1b	0.290707	2.91991e-13						Atp5a1	0.363823	1.21114e-11
Cds1	0.269066	1.08814e-55										Eif3l	0.300463	1.34046e-46						Kdm2a	0.46819	5.71769e-27		Erp44	0.339233	4.13422e-12						Sar1b	0.279863	2.94426e-13						Ahctf1	0.520484	1.3091e-11
Cnbp	0.419356	1.20656e-55										Fosl1	0.381776	1.43677e-46						Aqp3	0.3851	5.947e-27		Atg13	0.319851	4.32381e-12						Timm23	0.308773	3.30162e-13						Appl1	0.451883	1.50418e-11
Btf3	0.44585	1.43414e-55										Kdm5b	0.394175	2.45649e-46						Acbd5	0.570002	6.80167e-27		Mapk14	0.346287	4.64192e-12						Strn	0.336752	3.66421e-13						Lima1	0.474355	1.52229e-11
Lmo4	0.267795	1.46041e-55										Timm23	0.352135	2.65363e-46						Myo6	0.778294	7.32836e-27		Rpl36al	0.316787	4.96002e-12						Mbtd1	0.436457	4.00138e-13						Ep300	0.382931	1.8409e-11
Ankrd13c	0.304157	1.6603e-55										Nemf	0.310373	3.11993e-46						Tiparp	0.506961	7.58491e-27		1110008P14Rik	0.286379	5.35243e-12						Adgrg6	0.3152	4.04759e-13						Tlk2	0.506136	1.89116e-11
Tcf20	0.386057	1.66866e-55										Gk	0.32564	4.2935e-46						Tor1aip2	0.460691	8.05899e-27		Map2k3	0.371213	5.8552e-12						Erc1	0.407873	4.61932e-13						D16Ertd472e	0.340147	1.97704e-11
Garem1	0.292801	1.686e-55										Ambra1	0.42475	4.41297e-46						Gm15283	0.60366	8.17971e-27		Kremen1	0.2515	6.48547e-12						Dlg1	0.395762	4.66926e-13						Lnpep	0.363351	2.04951e-11
Msi2	0.376663	1.97082e-55										Ift20	0.309128	5.08222e-46						Mllt3	0.562211	8.44189e-27		Ak2	0.348974	6.58713e-12						Xpr1	0.35875	4.68285e-13						Brd8	0.427066	2.06099e-11
Eif5b	0.427866	2.79017e-55										Clasp1	0.398369	9.13954e-46						Tmem131	0.518109	8.67804e-27		Mark4	0.277497	1.12838e-11						Rpl31	0.353633	4.8363e-13						Ptcd3	0.364325	2.19469e-11
Rpl34	0.458015	2.99097e-55										Rab5if	0.339552	1.28229e-45						Tet2	0.492885	8.88832e-27		Saa3	0.350526	1.40693e-11						Herc4	0.283305	4.97706e-13						Kdm2a	0.426951	2.21108e-11
Nono	0.320457	3.3351e-55										Btg2	0.466648	1.44058e-45						Ano1	0.315272	9.27405e-27		Chp1	0.304079	1.76312e-11						Rasa1	0.389371	5.08272e-13						Smap1	0.489273	2.30813e-11
Cox5b	0.416336	3.7374e-55										Top2b	0.420569	1.58476e-45						Stk38l	0.435849	9.40319e-27		Stub1	0.309035	1.78945e-11						Fst	0.416941	6.11957e-13						Thrap3	0.394494	2.48789e-11
Dst	0.528805	4.91381e-55										Tomm22	0.300842	1.58719e-45						Mon1a	0.303328	1.0704e-26		Acox1	0.307872	2.45664e-11						Ythdf2	0.296354	6.20193e-13						Mpzl1	0.340523	2.55269e-11
Ece1	0.39431	6.9162e-55										Atp5g1	0.388658	1.73429e-45						Hagh	0.394828	1.21065e-26		Usp32	0.335715	2.59259e-11						Rps25	0.371592	6.35321e-13						Eif5b	0.413603	2.7536e-11
Ralbp1	0.437909	7.33518e-55										Huwe1	0.45866	2.32847e-45						Mtm1	0.477476	1.2234e-26		Eif6	0.369328	2.81333e-11						Eps15l1	0.352957	6.38786e-13						Eif3j1	0.49021	2.76512e-11
Shroom4	0.333057	1.0591e-54										Arhgap5	0.379603	2.38107e-45						Nos1ap	0.474355	1.26679e-26		Edf1	0.375312	3.04317e-11						mt-Atp6	0.320503	6.42846e-13						Acin1	0.437828	2.79933e-11
Eif3c	0.41278	1.11841e-54										Slk	0.431588	2.89911e-45						Sesn2	0.439381	1.27754e-26		Hcfc1r1	0.315709	3.27913e-11						Dpm1	0.338151	6.63149e-13						Lmbr1l	0.394681	2.83699e-11
Crip2	0.353955	1.74532e-54										Yap1	0.3274	5.10829e-45						Celsr2	0.352399	1.27894e-26		Arpc1a	0.405699	5.7729e-11						Atl2	0.312729	6.71958e-13						Socs7	0.369817	3.06174e-11
Gpr107	0.318464	1.8211e-54										Zc3h12c	0.459984	5.41528e-45						Aff1	0.615275	1.28292e-26		Rtf2	0.257321	5.91211e-11						Brwd3	0.278849	6.83741e-13						Hnrnpdl	0.392153	3.07255e-11
Pfkp	0.395894	2.37206e-54										Ndufb4	0.28919	7.00087e-45						Mprip	0.481698	1.28892e-26		Sec24a	0.385721	6.27562e-11						Dip2b	0.372784	7.10481e-13						Zc3h14	0.40385	3.15621e-11
Prrc2c	0.46334	2.67761e-54										Ssr4	0.376873	1.20167e-44						Plet1	0.442398	1.37483e-26		Prkar2a	0.310201	6.39318e-11						Arfgap2	0.273486	7.28565e-13						Alkbh1	0.410319	3.18558e-11
Banf1	0.291654	3.41676e-54										Cox7c	0.374681	4.13666e-44						Bicdl1	0.414676	1.39064e-26		Map7d1	0.381634	6.41603e-11						Nfix	0.320672	7.76633e-13						Spaca6	0.397762	3.30313e-11
Exoc6b	0.463155	3.96626e-54										Eif4g1	0.35927	5.9486e-44						Ptgfrn	0.533401	1.39165e-26		Nhp2	0.336847	7.52914e-11						Pdhb	0.285482	7.82174e-13						Fbxw7	0.400634	3.41007e-11
Hadha	0.268958	4.09191e-54										Smim7	0.260173	6.51116e-44						Iffo2	0.437364	1.56139e-26		Atf3	0.327551	7.5778e-11						Plaa	0.345679	7.97369e-13						Tmem131	0.422885	3.63336e-11
Cpsf6	0.407354	4.329e-54										Brwd3	0.261677	1.17856e-43						Zfp750	0.430218	1.61606e-26		Sdc4	0.331295	9.18961e-11						Mrpl53	0.294572	8.21688e-13						Emsy	0.435507	4.00775e-11
Srsf7	0.376131	4.36935e-54										Ptgfrn	0.275169	2.37731e-43						Ext1	0.490869	1.81328e-26		Insig2	0.275374	1.00628e-10						Eif5b	0.354084	9.80037e-13						4930523C07Rik	0.398461	4.02235e-11
Hspa4	0.412776	4.73074e-54										Slain2	0.390021	4.32302e-43						Pcgf5	0.644436	1.85124e-26		Macf1	0.316559	1.01565e-10						Ptprg	0.346969	9.91024e-13						Nucks1	0.455802	4.19503e-11
Rps21	0.412386	5.29308e-54										Atp5j2	0.388121	9.48499e-43						Fnbp4	0.35831	1.93894e-26		Pls3	0.282898	1.16288e-10						Scyl2	0.364551	1.01304e-12						Pias2	0.532628	4.50173e-11
Lrch1	0.469494	8.07799e-54										Mtmr10	0.296602	1.03749e-42						Ctdp1	0.440145	2.23331e-26		Psmc2	0.274347	1.25316e-10						Dynlt3	0.36203	1.2346e-12						Retreg1	0.333608	4.7213e-11
Strn	0.253879	1.46056e-53										Pum2	0.416142	1.70356e-42						Tead1	0.568534	2.32833e-26		Heca	0.314539	1.82458e-10						Vcl	0.316714	1.41634e-12						Rprd2	0.453839	5.13965e-11
Mbnl1	0.433611	1.57986e-53										Srebf2	0.305217	1.95767e-42						Gmeb1	0.439616	2.40682e-26		Ccdc6	0.320277	1.883e-10						Tprgl	0.285714	1.478e-12						Naf1	0.323759	5.32564e-11
Nos1ap	0.261573	1.6604e-53										Rab22a	0.37358	1.96732e-42						Csnk1d	0.475526	2.42455e-26		Cldnd1	0.318011	2.2e-10						Foxn3	0.313816	1.5698e-12						Dicer1	0.369875	5.3286e-11
Gpatch8	0.436246	2.32567e-53										Phactr4	0.35101	2.05711e-42						Mdn1	0.404929	2.71745e-26		Mycbp2	0.254467	2.92234e-10						Smg7	0.356753	1.71042e-12						Taf1d	0.37789	5.48371e-11
Appl1	0.39249	2.42797e-53										Glrx3	0.314253	2.18635e-42						Eif2s3y	0.432408	3.46959e-26		Ripk2	0.322147	3.05293e-10						Mdm4	0.308683	1.77874e-12						Faf1	0.406322	5.80073e-11
Uqcc2	0.353372	2.56862e-53										Atp5c1	0.363174	2.44085e-42						Fryl	0.449506	4.6261e-26		Chmp1a	0.251252	3.99772e-10						Rps20	0.356061	1.79164e-12						Amd1	0.284476	5.81492e-11
Snhg8	0.318646	3.15517e-53										Wdfy2	0.325795	2.61415e-42						Vps37b	0.295807	4.96643e-26		Mknk2	0.277592	4.26823e-10						Rplp2	0.314168	1.79392e-12						Foxj2	0.297203	6.10706e-11
Slc25a25	0.338143	3.63646e-53										Frk	0.285314	2.92245e-42						Tspan14	0.456492	4.98166e-26		Ranbp9	0.406647	4.54737e-10						Arl5b	0.371041	1.92662e-12						Mki67	0.587257	6.22675e-11
U2af1	0.309445	3.77769e-53										Mrps21	0.264106	4.3918e-42						Emp2	0.337948	5.07094e-26		Srebf2	0.260353	5.79263e-10						Tcf12	0.497858	2.00535e-12						Usp7	0.43929	6.33184e-11
Ivns1abp	0.350447	3.83949e-53										Lamtor4	0.290154	6.49325e-42						Lpp	0.423471	6.17508e-26		Lrp10	0.276343	6.29224e-10						Kdm5c	0.369788	2.03507e-12						Hltf	0.316916	6.62495e-11
Itpkc	0.402975	4.17674e-53										Gnai3	0.382821	6.39524e-41						Eif3j1	0.518558	6.27092e-26		Fer	0.311082	6.69097e-10						Plcg2	0.301027	2.03961e-12						Avl9	0.401278	6.72217e-11
Timm23	0.343818	4.17822e-53										Hadha	0.266781	6.98422e-41						Nfx1	0.494232	6.54964e-26		H3f3a	0.267168	8.17403e-10						A930015D03Rik	0.256587	2.11705e-12						Adss	0.449537	7.54435e-11
Polr2f	0.299238	4.95197e-53										Ndufb10	0.297173	7.47102e-41						Polk	0.421094	7.40419e-26		Senp2	0.327054	9.42783e-10						Krt10	0.609897	2.12734e-12						Itpkc	0.448873	8.39751e-11
Eif5a	0.430722	5.21923e-53										Ubqln1	0.259472	9.35523e-41						Traf3ip2	0.39756	8.50152e-26		Clpx	0.269598	1.26796e-09						Kif1c	0.265866	2.45792e-12						Nrip1	0.503604	8.74051e-11
Dek	0.487527	7.11151e-53										Cox5b	0.381742	1.53051e-40						Galnt7	0.469942	8.89737e-26		Vamp8	0.353943	1.78642e-09						Rpl26	0.372056	2.46282e-12						Nr2c2	0.421313	8.82452e-11
Spin1	0.288362	9.00443e-53										Gas5	0.377487	2.21945e-40						Wdr44	0.566252	1.06188e-25		Mark2	0.36173	1.99602e-09						Supt6	0.304278	2.5151e-12						Nfkb1	0.479898	9.53207e-11
Zfp644	0.349512	9.18105e-53										Supt6	0.272475	3.12417e-40						Dlg2	0.763102	1.08056e-25		Ndufa11	0.288695	2.72496e-09						Rps4x	0.386424	2.55739e-12						Hira	0.346239	9.64536e-11
Mcmbp	0.380789	9.94596e-53										Ppia	0.343518	5.98974e-40						Ipmk	0.588874	1.14804e-25		Ppm1b	0.314991	3.55315e-09						Rps5	0.396306	2.60725e-12						Tpm1	0.592663	1.0007e-10
Ppp4r1	0.396552	1.01025e-52										Vamp8	0.321538	8.25033e-40						Pak1	0.402382	1.1484e-25		Oser1	0.269149	4.18776e-09						Rab22a	0.374126	2.7673e-12						Fgd4	0.303909	1.00268e-10
Anp32e	0.286674	1.3571e-52										Scp2	0.293459	1.22831e-39						Dpm1	0.530876	1.21826e-25		Ndufc1	0.265042	4.32494e-09						Pgrmc2	0.265968	2.92199e-12						Mllt10	0.451525	1.02631e-10
Rangap1	0.294308	1.47442e-52										Eif3b	0.266654	3.38702e-39						Zbtb16	0.367187	1.33284e-25		Rplp0	0.3657	4.38033e-09						Hmg20b	0.278382	3.26813e-12						Maml2	0.438275	1.06334e-10
Rora	0.442002	1.66786e-52										Ndufv3	0.30427	7.94553e-39						Rufy3	0.493352	1.41426e-25		Smdt1	0.333116	4.46212e-09						Rps14	0.35884	3.57519e-12						Dtnb	0.375258	1.06977e-10
Snrpd2	0.352012	1.71086e-52										Cct2	0.309223	9.42203e-39						Rgmb	0.345904	1.57817e-25		Pycard	0.514934	4.82863e-09						Bcas3	0.343539	3.58724e-12						Ppm1g	0.367562	1.14194e-10
Smc1a	0.378377	1.77815e-52										Ndufs6	0.31374	9.57135e-39						Mdm4	0.479177	1.69763e-25		Irf6	0.29931	4.99084e-09						Sphk1	0.284553	3.75134e-12						Akap8	0.344753	1.15744e-10
Wdr20	0.259466	1.81679e-52										Atp5a1	0.318287	1.21203e-38						Mark4	0.391848	1.79304e-25		Wasl	0.351669	8.795e-09						Rps13	0.375598	3.90075e-12						Pspc1	0.405188	1.23094e-10
Zfas1	0.302852	1.88778e-52										Ndufs5	0.26558	1.25426e-38						Cdkal1	0.502865	1.98986e-25		Ttc39b	0.331574	1.14499e-08						Impad1	0.308361	4.36789e-12						Ahdc1	0.292151	1.26485e-10
Aebp2	0.472191	2.13732e-52										Atp5h	0.325649	1.38703e-38						Mpp7	0.472573	2.06403e-25		Cdyl	0.273655	1.55372e-08						Mcmbp	0.305369	4.64744e-12						Plxdc2	0.365933	1.30644e-10
Pdap1	0.333501	2.28807e-52										Uqcrb	0.295066	1.43588e-38						Ablim1	0.692938	2.13942e-25		Micu2	0.265913	1.58566e-08						Psmc5	0.262916	5.11793e-12						Npat	0.377557	1.36526e-10
Rbm27	0.347689	2.83518e-52										Myo10	0.32989	1.82823e-38						Cnksr3	0.599102	2.45651e-25		Snx9	0.324219	2.60415e-08						Acvr2a	0.345734	5.89764e-12						Cul3	0.40322	1.37687e-10
Ndufa10	0.252283	3.02389e-52										Eif4g2	0.349969	2.13549e-38						Dlg1	0.492323	2.51936e-25		Pqlc1	0.328471	2.95515e-08						Sap130	0.278441	7.06113e-12						Ncor2	0.39703	1.3789e-10
Snrpe	0.380074	3.07276e-52										Pdlim5	0.364803	2.94908e-38						Ash1l	0.478403	2.75302e-25		Atp6v0b	0.272258	3.07184e-08						Acbd5	0.386459	7.27263e-12						Dab2ip	0.298639	1.41587e-10
Numa1	0.317146	4.32674e-52										Smarca4	0.294564	8.13717e-38						Mbnl2	0.375193	2.80687e-25		Dctn3	0.26501	3.65969e-08						Dhx15	0.334525	7.54774e-12						Tnpo3	0.506003	1.5067e-10
Eif3i	0.356409	4.72473e-52										Top1	0.347575	8.26417e-38						Akirin2	0.4938	3.46639e-25		Ppp1cb	0.278915	3.78939e-08						Bzw2	0.32931	7.77027e-12						Pvt1	0.520889	1.59911e-10
Ankrd17	0.504534	5.05933e-52										Ndufb8	0.295791	1.17229e-37						Hpgds	0.582021	4.50727e-25		Pdxdc1	0.263896	4.16619e-08						Zbtb7a	0.287993	7.99198e-12						Cdkal1	0.4207	1.62317e-10
Naa50	0.381515	5.16482e-52										Eif3c	0.340124	1.34663e-37						Hdgfl3	0.407031	4.78612e-25		Dbi	0.440829	4.5421e-08						Sgms1	0.34254	8.34197e-12						Actn4	0.363956	1.70666e-10
Nsa2	0.391144	6.65502e-52										Smdt1	0.347097	1.50096e-37						Plxna2	0.459329	4.83193e-25		Baz2a	0.257087	4.77774e-08						Chchd3	0.360987	8.89118e-12						Jmy	0.374062	1.71171e-10
Lmna	0.468122	7.2572e-52										Cyb5a	0.312619	2.52003e-37						Ddx42	0.478213	5.07768e-25		Cyth3	0.292745	6.48456e-08						Larp1	0.31014	9.2112e-12						Wdr20	0.47746	1.72136e-10
Eif3k	0.437177	8.25444e-52										Exoc6b	0.398565	2.55802e-37						Il34	0.540389	5.11924e-25		Uqcrb	0.275703	6.53764e-08						Rpl19	0.344659	9.33366e-12						Smg6	0.513628	1.74566e-10
Mef2a	0.501655	8.70685e-52										Metap1	0.271641	3.06522e-37						Rangap1	0.372612	5.93113e-25		Tnip1	0.255625	1.51311e-07						Arpc5l	0.256591	9.89576e-12						Qrich1	0.39971	1.75736e-10
Tecr	0.301936	1.02781e-51										Flnb	0.308548	3.31722e-37						Limk2	0.329638	6.32001e-25		Dynlt3	0.266112	1.84404e-07						Rps9	0.348794	1.00604e-11						Traf3ip2	0.350515	1.76651e-10
Rpl31	0.440208	1.1419e-51										Bcap31	0.278349	3.47525e-37						Foxj3	0.550942	6.32706e-25		Ppp1r2	0.273646	2.15549e-07						mt-Co3	0.287867	1.01999e-11						Arglu1	0.382236	1.7959e-10
Sltm	0.401509	1.41941e-51										Pex14	0.259856	3.54524e-37						Slc6a14	0.90149	6.60595e-25		Hsp90ab1	0.255788	2.46466e-07						Zc3h13	0.334467	1.03395e-11						Atp11c	0.502524	1.84817e-10
Prdm10	0.279722	2.27216e-51										Actn4	0.309858	4.28285e-37						Serbp1	0.349688	7.12757e-25		Tom1l2	0.280252	2.8006e-07						Strn3	0.345053	1.16432e-11						Rbm6	0.404453	2.17163e-10
Ppp4r3a	0.355048	2.69802e-51										Relch	0.271111	6.13492e-37						Zfp609	0.571184	7.47e-25		Atp2a2	0.251205	3.49585e-07						Desi2	0.426681	1.24059e-11						Atxn7	0.475628	2.30564e-10
Rpl24	0.424836	2.96765e-51										Psme2	0.253306	8.16925e-37						Efnb2	0.424652	7.98579e-25		Akirin2	0.259057	5.4059e-07						Trp53inp2	0.273798	1.41063e-11						Sun1	0.317165	2.37188e-10
Khsrp	0.277663	3.47177e-51										March5	0.31139	1.82711e-36						Gng12	0.46117	8.15187e-25		Uba52	0.297263	6.08822e-07						Stim2	0.352326	1.57805e-11						Tcea1	0.349662	2.71005e-10
Ndufa1	0.319354	3.64237e-51										Cdk6	0.285488	1.94004e-36						Btbd9	0.394594	8.43231e-25		Ppp1r15a	0.277596	6.24239e-07						4930523C07Rik	0.353367	1.65001e-11						Pbx3	0.54984	2.99711e-10
Ahctf1	0.271794	3.79991e-51										Chmp2a	0.272708	3.48051e-36						Rtf1	0.52211	8.85656e-25		Ralgapa2	0.291394	6.60589e-07						Rack1	0.35534	1.71143e-11						Cspp1	0.491201	3.00592e-10
Ddx42	0.33323	4.83018e-51										Ndufa11	0.257999	3.6053e-36						Khdc4	0.471257	8.98457e-25		Eif5	0.313696	6.83658e-07						Rpl14	0.387775	1.80248e-11						Atf6	0.551561	3.03055e-10
Uqcrc2	0.255345	5.23645e-51										Rtf1	0.299511	4.44641e-36						Sbno2	0.496696	9.10413e-25		Ptma	0.266512	7.43707e-07						Srcap	0.267261	1.99272e-11						Otud7b	0.473143	3.16852e-10
Katnbl1	0.323396	6.94455e-51										Dennd4c	0.433844	2.10802e-35						Col23a1	0.451485	9.58218e-25		Mocs2	0.269779	8.49766e-07						Mfsd5	0.262027	2.03637e-11						Wwc2	0.495229	3.3248e-10
Tmtc2	0.254403	7.81063e-51										Myo1e	0.302059	2.48555e-35						Scaf11	0.446376	9.65705e-25		Pi4k2a	0.265342	1.40991e-06						Atg2b	0.267702	2.18997e-11						Amotl1	0.321532	3.36557e-10
Bmpr1b	0.306085	7.89651e-51										Rps27rt	0.283041	3.46277e-35						Tm9sf2	0.451567	1.03893e-24		Acbd5	0.277479	1.65367e-06						Arhgap32	0.316333	2.19654e-11						Pdcd4	0.394573	3.74903e-10
Cct5	0.351321	7.95639e-51										Slmap	0.384272	3.65437e-35						Cop1	0.549352	1.04535e-24		Kmt5a	0.266956	1.72471e-06						Ifi202b	0.27486	2.31865e-11						Hace1	0.440465	4.17506e-10
Dstn	0.332427	9.53157e-51										Atp2b4	0.320061	9.92175e-35						Sqle	0.36051	1.35639e-24		Ccdc59	0.271556	1.87474e-06						E130308A19Rik	0.27878	2.32721e-11						Ube3c	0.354324	4.45383e-10
Eif3b	0.292389	1.06946e-50										Ndufb11	0.318419	2.81057e-34						Prdm10	0.378324	1.54079e-24		Vcp	0.270892	1.93021e-06						Phf20l1	0.3537	2.33825e-11						Dusp6	0.411845	4.55644e-10
Tcp1	0.358732	1.14163e-50										Psmb4	0.318762	3.52977e-34						Il33	0.449439	1.5662e-24		Tle5	0.308896	2.06863e-06						Mapk3	0.343908	2.58402e-11						Zbtb11	0.460499	4.9901e-10
Itgb1	0.642379	1.14611e-50										Eif5b	0.33971	3.70417e-34						Exoc4	0.447428	1.63214e-24		Tmem59	0.277278	2.5775e-06						H2afv	0.251634	2.58697e-11						Cnot1	0.45886	5.27844e-10
Rfc1	0.290588	1.21005e-50										Foxn3	0.290395	3.91999e-34						Sik1	0.491827	1.94315e-24		Qars	0.2633	2.74457e-06						Txlng	0.280325	2.63148e-11						Cldn1	0.29332	5.29637e-10
Pde7a	0.2903	1.38257e-50										Rasa1	0.293007	3.94013e-34						Prpf40a	0.441178	1.99255e-24		Sgms1	0.250734	6.68038e-06						Atox1	0.354843	2.72709e-11						Nap1l1	0.360569	5.63365e-10
Serpinb2	0.688236	1.4394e-50										Arhgap12	0.276531	5.68361e-34						Kmt2e	0.521957	2.53788e-24		Nfat5	0.259954	1.00207e-05						Ahnak	0.326442	2.95331e-11						Reps1	0.504942	6.07681e-10
Higd1a	0.413223	1.94579e-50										Abtb2	0.256283	6.32099e-34						Phactr4	0.652189	2.84098e-24		Sptlc2	0.281684	1.13958e-05						Acaa2	0.269997	3.01857e-11						Dgkd	0.33273	6.65176e-10
Sdc1	0.386098	2.23793e-50										Camta1	0.288643	9.52189e-34						Uba6	0.521857	3.09918e-24		Eif4g1	0.253559	1.78837e-05						Plekha5	0.271256	3.30967e-11						Arhgap12	0.429029	6.76124e-10
Frs2	0.390073	2.59152e-50										Nsa2	0.340495	1.18732e-33						Homer2	0.665354	3.14363e-24		Smpdl3a	0.259038	1.80148e-05						Ubxn7	0.383872	3.34084e-11						Ncbp1	0.299838	7.25376e-10
Cct2	0.340325	4.45898e-50										Appl1	0.30726	1.872e-33						Itgb4	0.399811	3.21553e-24		Stk4	0.278955	2.11254e-05						Slit3	0.332981	3.41647e-11						Caprin1	0.395112	7.3018e-10
Stk39	0.263463	4.73083e-50										Bsdc1	0.267772	1.91285e-33						Retreg3	0.488295	3.54609e-24		Ube2h	0.273685	4.75291e-05						Arhgef11	0.359027	3.65694e-11						Prpf38b	0.394434	8.4253e-10
Eif3h	0.418645	5.11781e-50										Psmb1	0.303809	2.40189e-33						Dip2c	0.545839	3.6945e-24		Glrx	0.361761	5.23289e-05						Mon2	0.453321	4.0204e-11						Sin3a	0.409031	8.46883e-10
Erc1	0.381926	5.52269e-50										Atp5l	0.303376	3.98099e-33						Dctn4	0.467743	4.42133e-24		Trip12	0.272415	5.25634e-05						Cpe	0.44471	4.04122e-11						Gtf2ird1	0.343397	8.85553e-10
Gm11808	0.333485	5.68911e-50										Xrn2	0.335168	4.22023e-33						Ammecr1	0.461502	4.63343e-24		Bag1	0.277778	5.73437e-05						Gpatch8	0.326841	4.25063e-11						Rabgap1l	0.309888	8.91696e-10
Tpd52l2	0.265456	6.02157e-50										Vcl	0.371062	5.06896e-33						Ap1ar	0.417318	4.81097e-24		Uba1	0.266069	8.25504e-05						Ptms	0.3298	4.33974e-11						Sik1	0.55921	9.88694e-10
Arl5b	0.379145	7.01561e-50										Sppl3	0.394012	6.04836e-33						Mfn1	0.342125	5.64334e-24		Scd2	0.332695	8.29735e-05						Dennd4c	0.34196	4.66143e-11						Supt16	0.404819	1.01161e-09
Nrip1	0.453191	7.02762e-50										Memo1	0.279078	9.56735e-33						Mfhas1	0.480856	6.35626e-24		Itgb5	0.268293	8.29744e-05						Zc3h12a	0.279371	4.66668e-11						Smg7	0.468718	1.02445e-09
Asap1	0.60816	7.13173e-50										Usp32	0.271981	9.77825e-33						Nebl	0.607059	6.82566e-24		Ube2k	0.263542	0.000120577						Rnf10	0.333276	4.97791e-11						Foxo1	0.445684	1.22062e-09
Atf3	0.767504	9.20799e-50										Cox6a1	0.327033	1.32869e-32						Ptcd3	0.321788	9.62156e-24		Golgb1	0.272429	0.000144583						Ube2e2	0.385461	5.27077e-11						Mindy3	0.417252	1.43562e-09
Cd24a	0.255073	9.80049e-50										Csnk2a1	0.280534	1.40523e-32						B3galnt2	0.399781	1.13184e-23		Atad2b	0.267024	0.000159949						Rps24	0.33086	5.33272e-11						Mbtd1	0.494192	1.4631e-09
Prpf39	0.378976	9.87951e-50										Ahcyl1	0.266511	1.82612e-32						Tmcc3	0.633875	1.2018e-23		Timm23	0.251047	0.000344931						Tm9sf2	0.331159	5.49735e-11						Swt1	0.358618	1.52677e-09
Slc39a6	0.276284	9.94661e-50										Atp5o	0.277586	2.74668e-32						Man1a2	0.438525	1.51831e-23		Wdr26	0.331507	0.000413225						Pgap2	0.282398	5.55905e-11						Ppp1r12a	0.394501	1.62942e-09
Hsf2	0.29962	1.00567e-49										Tle5	0.277065	2.75073e-32						Itpk1	0.514315	1.54211e-23		Eif4h	0.26889	0.0011026						St5	0.358304	5.58422e-11						Stard5	0.317215	1.687e-09
Gm2000	0.398041	1.06102e-49										Atp5b	0.297707	2.90104e-32						Wwc2	0.470895	1.55551e-23		Sltm	0.264825	0.00593116						Hal	0.268393	6.03533e-11						Rab3gap1	0.346999	1.69814e-09
Top2b	0.40159	1.09151e-49										Ppm1b	0.25793	2.94884e-32						Mob2	0.440993	1.59402e-23		Ythdc1	0.252502	0.0121257						Rpl6	0.351589	6.1624e-11						Etfdh	0.338164	1.7151e-09
Nxn	0.298268	1.12752e-49										Eif3e	0.310919	3.40343e-32						Qk	0.444438	1.94935e-23		Chic2	0.277135	0.0122488						Tspan9	0.264492	6.32901e-11						Hs2st1	0.692437	1.74573e-09
Zfp706	0.319183	1.29929e-49										Metap2	0.302439	4.67074e-32						Pi4k2a	0.436659	2.64929e-23		Map1lc3b	0.312128	0.0222014						Tubb4b	0.339437	6.39667e-11						Sgms1	0.390937	1.75045e-09
Nhp2	0.259944	1.49669e-49										Cct5	0.256522	6.4377e-32						Ptpn14	0.422656	3.20158e-23		Piezo1	0.322199	0.0371154						Kdm1a	0.280761	6.51904e-11						Pkp3	0.26042	1.76253e-09
Sdc4	0.437267	2.06137e-49										Psmb5	0.261572	1.17538e-31						Gnai3	0.478326	3.33301e-23										Rps3	0.346661	6.72924e-11						Chl1	0.331009	1.7913e-09
Aff1	0.486467	2.1041e-49										Purb	0.285483	1.23053e-31						Hectd1	0.330552	3.38144e-23										Snhg8	0.32864	7.00156e-11						Dnmt3a	0.383007	1.79941e-09
Srsf10	0.309328	2.19041e-49										Ubl5	0.297502	1.70345e-31						Mtrex	0.413764	3.83389e-23										Fyttd1	0.26647	7.3431e-11						Rps6ka5	0.482133	1.88836e-09
Ndufb2	0.25759	2.28577e-49										Tle4	0.288723	4.13802e-31						Numa1	0.459663	4.17041e-23										Riok1	0.310679	7.7714e-11						Rhot1	0.348635	1.90454e-09
Top1	0.487298	2.70553e-49										Enah	0.31764	4.14911e-31						Rif1	0.392291	4.37804e-23										Map3k8	0.346757	8.09977e-11						Gnl3	0.422555	1.90635e-09
Pi15	0.435453	3.17287e-49										Rgs2	0.363811	4.37023e-31						Vezt	0.357844	4.41173e-23										Atxn7l3b	0.263121	8.91083e-11						Rsl1d1	0.360457	1.90689e-09
Pls3	0.465815	3.85334e-49										Dnajc5	0.305493	4.39609e-31						Ahctf1	0.443812	4.99021e-23										Elovl6	0.445333	9.41229e-11						Uba6	0.420079	2.09021e-09
Lemd3	0.403069	3.87432e-49										Plekha5	0.256466	4.45178e-31						Bmt2	0.48902	5.60043e-23										Rpl27a	0.322298	9.80575e-11						Cstf3	0.396159	2.24044e-09
Ube2q2	0.561491	6.20673e-49										Timm13	0.297682	6.39109e-31						Gpbp1	0.446958	6.11744e-23										Atp5o	0.317866	9.93045e-11						Abcd3	0.321346	2.43535e-09
Tjp2	0.426838	7.38071e-49										Daam1	0.254389	6.42085e-31						Zfand5	0.424806	6.96863e-23										Dhx9	0.292541	9.94319e-11						Trip12	0.419874	2.44073e-09
Atp5o	0.35263	8.24852e-49										Ndufb5	0.26116	7.93148e-31						Ppp6r3	0.471599	7.07518e-23										Ube2q2	0.394324	1.1589e-10						Epc1	0.382561	2.6054e-09
Msmo1	0.289265	8.90391e-49										Pum1	0.352091	1.24439e-30						Ralbp1	0.459677	7.68579e-23										Srsf2	0.266601	1.19026e-10						Abtb2	0.520329	2.70159e-09
Immp2l	0.397278	1.30041e-48										Hnrnpul2	0.265291	1.33075e-30						Ahnak2	0.448688	7.86309e-23										Wac	0.363786	1.25283e-10						Adnp	0.363841	2.77663e-09
Ndufb5	0.349838	1.43214e-48										Uqcr11	0.29673	2.93386e-30						Kat7	0.392047	8.36097e-23										Memo1	0.348675	1.47315e-10						Frs2	0.456539	2.92357e-09
Ppm1l	0.290919	1.47964e-48										Map7d1	0.302002	3.1094e-30						Kat6a	0.458188	8.79876e-23										Ndel1	0.262065	1.49893e-10						Cdc37l1	0.465512	2.93755e-09
Tnks2	0.415606	1.72507e-48										Lamtor2	0.259052	3.13588e-30						Sec61a2	0.362841	9.75583e-23										Atp13a3	0.362651	1.58993e-10						Trip11	0.362881	3.08103e-09
Lrrc8b	0.267893	1.80746e-48										Prelid1	0.289949	4.32805e-30						Mkln1	0.536869	1.10201e-22										Prdx2	0.31169	1.69751e-10						Eml4	0.464441	3.22924e-09
Llph	0.276727	2.02307e-48										Arl8b	0.297759	5.58507e-30						Smurf2	0.531099	1.18694e-22										Il20rb	0.274262	1.72552e-10						Erbb3	0.36572	3.27597e-09
Tmem65	0.341614	2.19317e-48										Ogdh	0.252823	1.2214e-29						Tmem51	0.384845	1.26415e-22										March5	0.295547	1.73834e-10						Ppp6r3	0.412506	3.32495e-09
Sar1b	0.318793	3.01902e-48										Cnbp	0.274494	1.6037e-29						Otud4	0.463221	1.49646e-22										Kmt2c	0.410106	1.82529e-10						Naa50	0.388356	3.40454e-09
Eif3m	0.31978	3.43563e-48										Eif3j1	0.2528	4.17069e-29						Msi2	0.46977	1.71215e-22										Cnn2	0.275412	1.89049e-10						Rbm27	0.457996	3.7215e-09
Usp14	0.264289	3.6519e-48										Zc3h15	0.253801	4.25305e-29						Heatr1	0.318932	1.72233e-22										Npepps	0.354217	2.01239e-10						Rgs20	0.434049	3.76177e-09
Stim2	0.421143	5.26608e-48										Ndufa7	0.251049	7.91193e-29						Nectin2	0.369347	1.79863e-22										Rps27a	0.314131	2.241e-10						Cog5	0.44427	3.86338e-09
Hspa9	0.3945	6.30843e-48										Rcor1	0.286644	9.03813e-29						Slc9a1	0.453404	1.89755e-22										Rbm27	0.315953	2.36432e-10						Hspa9	0.366617	4.05873e-09
Hspe1	0.418236	6.93012e-48										Hsd17b12	0.272795	1.32397e-28						Sik3	0.418478	1.91821e-22										Arhgef4	0.299094	2.51053e-10						Rbbp7	0.353888	4.15351e-09
Stam	0.351521	7.01834e-48										Rab1a	0.307638	1.8667e-28						Stam2	0.52861	1.94347e-22										Eif3h	0.314785	2.60023e-10						Kif16b	0.339139	4.21206e-09
Actn4	0.420434	7.55105e-48										Psen1	0.280912	1.96186e-28						Prnp	0.426937	2.06676e-22										Atf3	0.487225	2.63753e-10						Tab3	0.351282	4.24034e-09
Med13l	0.439631	9.41739e-48										Ppp1cb	0.253715	3.71224e-28						Ankrd28	0.512107	2.10347e-22										Ube2n	0.304265	2.63949e-10						Axin1	0.376776	4.69738e-09
Thrap3	0.409199	9.91909e-48										Ptp4a2	0.299072	4.79706e-28						Rapgef6	0.447618	2.1295e-22										Zfc3h1	0.382272	2.74287e-10						Spag9	0.400487	5.46616e-09
Arhgef12	0.351511	1.12364e-47										Agfg1	0.287352	8.51584e-28						Msmo1	0.509983	2.2507e-22										Cop1	0.290996	2.90751e-10						Kansl3	0.43554	6.0794e-09
Tra2a	0.380691	1.13503e-47										Hnrnpab	0.256735	1.27258e-27						Hivep1	0.482449	2.566e-22										Kdm6a	0.337953	2.96809e-10						Khsrp	0.348313	6.23391e-09
Cbx1	0.259312	1.39666e-47										Ube2e2	0.267506	4.021e-27						Tapt1	0.376699	2.81614e-22										Rpl29	0.37494	3.0122e-10						Ipo5	0.407719	6.56628e-09
U2surp	0.337981	1.4473e-47										Sptlc2	0.313011	6.89555e-27						Ptgs1	0.367714	2.91609e-22										Ckap5	0.319942	3.03724e-10						Hagh	0.304369	6.6218e-09
Mtf2	0.250136	1.59531e-47										Paip2	0.270276	8.04889e-27						Shoc2	0.43409	3.41899e-22										Tcerg1	0.312686	3.03822e-10						Ranbp2	0.382194	6.8248e-09
Tspan5	0.452132	1.71509e-47										Cox7b	0.268714	1.51211e-26						Mtf2	0.461418	3.5818e-22										Alkbh1	0.261843	3.16417e-10						App	0.355363	7.11577e-09
Zcchc7	0.419262	1.78766e-47										Ythdc1	0.280806	3.28834e-26						Adrb2	0.29953	4.11772e-22										Hmgcr	0.31918	3.16862e-10						Mir100hg	0.43504	7.32163e-09
Slc7a1	0.256098	1.80711e-47										Hdgf	0.259037	5.81926e-26						Tnfaip3	0.47882	4.11819e-22										Cadm1	0.28293	3.25537e-10						Man1a2	0.403774	7.34383e-09
Polb	0.269434	1.86517e-47										Psmd11	0.280658	7.35412e-26						Erbb2	0.27566	4.21682e-22										Daam1	0.281961	3.30518e-10						Mdm4	0.38772	7.34992e-09
Hdgf	0.36682	1.92787e-47										Ubn2	0.298992	9.3487e-26						Lmo7	0.607306	4.34429e-22										Tet3	0.387597	3.32911e-10						Nr1d2	0.345794	7.49226e-09
Ndufs4	0.3146	2.71831e-47										Rpl38	0.258148	9.9715e-26						Smoc2	0.411587	4.37648e-22										Uqcrh	0.295578	3.89997e-10						1810026B05Rik	0.439953	7.64879e-09
Fgd6	0.266346	2.77933e-47										Anxa2	0.259148	1.09613e-25						Alkbh1	0.434564	5.27308e-22										Mob1b	0.340895	4.33449e-10						Desi2	0.562155	7.79712e-09
Znrf2	0.299286	3.01853e-47										Mbtd1	0.263388	2.08264e-25						Asap1	0.510646	5.96546e-22										Zfp706	0.313487	4.33618e-10						Trp53inp1	0.417184	7.92106e-09
Arid4b	0.562329	3.05287e-47										Bmpr2	0.267604	3.69593e-24						Shb	0.494787	6.29906e-22										Camta1	0.327772	4.74611e-10						Aftph	0.43989	7.99682e-09
Rbbp7	0.274783	3.37798e-47										Nrip1	0.288255	4.24571e-24						Casc3	0.404692	6.46171e-22										Crim1	0.251856	4.78585e-10						Cbx1	0.362146	8.49266e-09
Hnrnpc	0.456145	3.86923e-47										Atp1b3	0.300641	1.75708e-23						Hook2	0.275058	6.939e-22										Zfand6	0.261388	5.27126e-10						Trim44	0.370829	8.67517e-09
Rps27rt	0.32544	4.17022e-47										Arl15	0.278774	4.29422e-23						Hnrnpm	0.457488	7.18722e-22										Ndufa12	0.253419	5.38877e-10						Hibadh	0.406496	8.89884e-09
Hnrnpdl	0.341031	5.96059e-47										Vcp	0.262772	4.41792e-23						Anxa1	0.569758	7.64132e-22										Arid1b	0.351658	5.44007e-10						Trp53	0.315296	9.14478e-09
Ndufb10	0.308042	6.08725e-47										Cox6b1	0.267301	5.53694e-23						Ncor1	0.425134	7.65331e-22										Cox7c	0.353474	6.40633e-10						Malat1	0.309655	9.87152e-09
Zfp36l2	0.333459	6.61522e-47										Mif	0.260287	7.07351e-23						Carmil1	0.384922	9.04083e-22										Tcf20	0.345963	6.98943e-10						Rfwd3	0.43627	9.87328e-09
Kdm3b	0.285886	7.44444e-47										Atp5g2	0.264187	7.81597e-23						Atg2b	0.385283	9.49928e-22										Smyd3	0.346744	7.08198e-10						Rp9	0.295086	1.01493e-08
Arhgap12	0.308298	1.05133e-46										Smg1	0.273078	1.69261e-22						Cep170b	0.339603	9.68279e-22										Srsf11	0.33146	7.16685e-10						Anp32b	0.397904	1.06234e-08
Calm2	0.466358	1.50443e-46										Cnot2	0.266166	1.71953e-21						Cachd1	0.506645	1.01053e-21										Skp1a	0.269696	7.34322e-10						Ust	0.494921	1.08174e-08
Ddb1	0.319982	1.71756e-46										Cast	0.281157	2.91916e-21						Kpna1	0.502867	1.05074e-21										Mprip	0.290645	7.57534e-10						Ube2d2a	0.457221	1.10788e-08
Zbtb11	0.338507	2.61575e-46										F3	0.298891	1.49912e-20						Lrp6	0.409459	1.14658e-21										Lin52	0.286758	7.5796e-10						Zbtb2	0.470694	1.14607e-08
Chchd3	0.284375	2.80538e-46																		Rbm25	0.449003	1.19265e-21										Stat3	0.355315	7.67513e-10						Tet3	0.367719	1.26229e-08
Hmgb2	0.575689	2.973e-46																		C77080	0.308666	1.19769e-21										Tlk1	0.301347	7.89852e-10						Ddx5	0.294615	1.27007e-08
Api5	0.273843	3.12949e-46																		Gtf2ird1	0.336156	1.34649e-21										Usp24	0.330928	8.33161e-10						Ptpn12	0.506104	1.27795e-08
Smarca4	0.295759	3.40322e-46																		Nfe2l1	0.371558	1.35971e-21										Eif4g1	0.301867	8.59733e-10						Gm16685	0.295146	1.27974e-08
Thoc2	0.418218	3.829e-46																		Sgk3	0.453765	1.93418e-21										9930021J03Rik	0.318608	9.74602e-10						Ubr3	0.415985	1.30165e-08
Hnrnpm	0.412696	3.91171e-46																		Stx12	0.438863	2.11801e-21										Nr6a1	0.328999	1.19614e-09						Atp1a1	0.389392	1.42367e-08
Cbx5	0.270912	5.72207e-46																		Ranbp10	0.452621	2.31048e-21										Rtf1	0.316308	1.22168e-09						Rapgefl1	0.282651	1.64718e-08
Fmr1	0.323657	6.12863e-46																		Akap9	0.399976	2.32606e-21										Il13ra1	0.314273	1.26078e-09						Plxna2	0.558487	1.6557e-08
Sfpq	0.3955	8.99501e-46																		Ivns1abp	0.419366	2.36368e-21										Zfp280d	0.282637	1.38901e-09						Cdk13	0.363577	1.67315e-08
Ewsr1	0.404207	1.04946e-45																		Focad	0.376722	2.66445e-21										Ndufb5	0.301218	1.45114e-09						Selenoi	0.422715	1.68762e-08
Map1lc3a	0.317072	1.18964e-45																		Rab11a	0.450377	2.93392e-21										Rpl9	0.348469	1.56254e-09						Ehmt1	0.400322	1.89263e-08
Mrtfa	0.267175	1.23076e-45																		Rnf121	0.367063	3.10216e-21										Sltm	0.264961	1.59865e-09						Ube2b	0.329426	1.89751e-08
Schip1	0.272758	1.27168e-45																		Atp2b4	0.466562	3.54453e-21										Scamp1	0.322428	1.84894e-09						Rnf19a	0.404468	1.97397e-08
Ubp1	0.267054	1.45335e-45																		Wdr45b	0.462861	3.88343e-21										Eif3c	0.268477	1.882e-09						Smc6	0.353606	2.08777e-08
Atg3	0.361112	3.99244e-45																		Txlng	0.444921	4.46534e-21										Ndufb11	0.274479	2.03118e-09						Itgb1	0.400094	2.13263e-08
Tlk1	0.312293	4.70259e-45																		Slc20a2	0.437591	4.78637e-21										Timm13	0.258076	2.09563e-09						Clk1	0.429567	2.18585e-08
Rps6kb1	0.30316	4.91165e-45																		Fgfr1op	0.311268	5.37366e-21										Smg6	0.298995	2.12571e-09						Upf2	0.388737	2.18807e-08
Polr1d	0.377744	6.84328e-45																		Spint2	0.32741	5.57575e-21										Pi4k2a	0.313838	2.15267e-09						Creb5	0.508921	2.21215e-08
Uap1	0.346651	7.13427e-45																		Ezr	0.306908	5.57674e-21										Srsf3	0.33906	2.28704e-09						Tapt1	0.345599	2.25081e-08
Atxn1	0.501899	7.24182e-45																		Sbf2	0.416472	5.9134e-21										Usp25	0.367654	2.30825e-09						Ep400	0.37128	2.31789e-08
Aopep	0.428687	7.86022e-45																		Tex10	0.391616	6.01443e-21										Clint1	0.352835	2.48843e-09						Fbxo3	0.309703	2.60746e-08
Rasgef1b	0.266248	8.18257e-45																		Diaph1	0.384169	6.86672e-21										Ppp1r14b	0.280341	2.51768e-09						Ubr2	0.393452	2.66981e-08
Rpl22l1	0.379427	1.1145e-44																		Eif2s2	0.355329	7.14094e-21										Arl15	0.281146	2.68386e-09						Kdm5a	0.387209	2.70821e-08
Ambra1	0.435327	1.21848e-44																		Il1f9	0.306326	7.51116e-21										Aff1	0.309225	3.12821e-09						Rcl1	0.302529	2.84395e-08
Rsf1	0.383422	1.47971e-44																		Ckmt1	0.296421	8.87858e-21										Cldnd1	0.268774	3.17178e-09						Arl5b	0.355927	2.9978e-08
Rpl10	0.409055	1.57587e-44																		Ewsr1	0.471779	9.60669e-21										Eif5a	0.324332	3.23164e-09						Rb1cc1	0.406414	3.11053e-08
Mbd2	0.389299	1.6781e-44																		Avl9	0.407545	9.77359e-21										H1f0	0.251171	3.26457e-09						Ptma	0.375636	3.11715e-08
Foxn3	0.355437	2.5115e-44																		Foxn2	0.444441	9.85688e-21										Ankrd13c	0.256805	3.81761e-09						Unc45a	0.371635	3.12171e-08
Ptk2	0.284741	3.50665e-44																		Atp10a	0.479843	1.21806e-20										mt-Nd4	0.273545	3.88835e-09						Ddx3x	0.339325	3.18287e-08
Usp34	0.422382	3.69665e-44																		Slc30a4	0.403465	1.27162e-20										Rhbdf2	0.251484	4.60557e-09						Tmem87a	0.327835	3.21232e-08
Eif1ax	0.300675	4.13758e-44																		Fam83g	0.299795	1.30131e-20										Ppp2r3a	0.251723	4.89989e-09						Smchd1	0.378203	3.38252e-08
Fosl1	0.355961	4.85791e-44																		Timm23	0.388737	1.39285e-20										Usp53	0.255239	5.06812e-09						Rnf2	0.429037	3.72582e-08
Fyttd1	0.255884	5.09707e-44																		Sos2	0.485429	1.41217e-20										Tmem43	0.319137	5.07065e-09						Srrm1	0.338457	3.86176e-08
Smc4	0.390762	6.29429e-44																		8030462N17Rik	0.386127	1.48003e-20										Rpl21	0.328516	5.11461e-09						Cast	0.422843	3.93804e-08
Park7	0.293109	6.86938e-44																		Cd44	0.397212	1.4823e-20										Bmt2	0.27497	5.99883e-09						Zmynd11	0.350068	3.99823e-08
Srsf2	0.333704	9.80131e-44																		Slc5a1	0.845247	1.61107e-20										Ubac2	0.291157	6.04595e-09						Ipo8	0.312874	4.05301e-08
Fhit	0.377698	9.90401e-44																		Ranbp2	0.400708	1.97206e-20										Mib1	0.332398	6.07985e-09						Ogt	0.340636	4.28809e-08
Slc2a1	0.361213	1.23289e-43																		Ank3	0.305049	2.72056e-20										Sacm1l	0.266017	6.20853e-09						Wls	0.356055	4.55286e-08
Ltbp1	0.294539	1.29095e-43																		Peli1	0.547353	2.77126e-20										Arid4b	0.357275	6.80912e-09						Apoc1	0.471132	4.86461e-08
Micos13	0.260977	1.36384e-43																		Kdm5a	0.457988	3.0022e-20										Sec24b	0.287867	6.88936e-09						Set	0.315504	5.63326e-08
Cct6a	0.277528	1.54288e-43																		Dnm1l	0.440366	3.43332e-20										Arid2	0.27193	6.95754e-09						Zmym2	0.400298	5.87444e-08
Csnk1g1	0.349241	1.57173e-43																		Usp3	0.469786	3.53281e-20										Smarca4	0.274782	7.2461e-09						Shoc2	0.454785	5.97387e-08
Tial1	0.29466	2.1418e-43																		Kdm3a	0.402365	3.65846e-20										Larp4	0.271961	8.82114e-09						Neat1	0.318432	6.08057e-08
Nme1	0.341215	2.23674e-43																		Phf21a	0.397042	4.52556e-20										Cab39	0.297089	9.25171e-09						Eif4b	0.329137	6.57711e-08
Syncrip	0.361022	2.40228e-43																		Pnn	0.387739	4.85686e-20										Skint6	0.448863	9.52714e-09						Stxbp5	0.428648	6.82135e-08
R3hdm1	0.312925	2.61801e-43																		Med4	0.313609	5.56763e-20										Ndufa11	0.275024	1.06281e-08						Topbp1	0.317207	7.1015e-08
Sirt1	0.403901	3.15145e-43																		Setd2	0.440549	5.66386e-20										Pfdn5	0.289903	1.09245e-08						Ahr	0.575517	7.14396e-08
Tmem131	0.295424	3.28576e-43																		Adss	0.570881	5.70387e-20										Lmna	0.264765	1.09563e-08						Tdrd3	0.308283	7.66359e-08
Golga4	0.36522	3.44583e-43																		Nectin4	0.435284	6.58459e-20										Ppp2r2a	0.285492	1.16907e-08						G3bp2	0.328106	7.66534e-08
Tnpo3	0.282505	5.07155e-43																		Sirt1	0.637777	6.72914e-20										Rpl28	0.322998	1.2506e-08						Cbfb	0.402909	7.73218e-08
Kmt2c	0.429522	6.0462e-43																		Lsg1	0.290843	6.76122e-20										Atp5b	0.299153	1.284e-08						Cyld	0.364386	7.94876e-08
Fbxw7	0.308464	6.05198e-43																		Rb1cc1	0.401354	7.98108e-20										Dync1li1	0.25645	1.35057e-08						Dlg1	0.390344	8.02639e-08
Snu13	0.25593	6.73855e-43																		Srebf2	0.433089	9.56579e-20										Map4k5	0.254894	1.38029e-08						Rsbn1	0.32996	8.26497e-08
Kif13b	0.428629	1.39808e-42																		Ubash3b	0.664743	1.03384e-19										Cfl2	0.354642	1.45359e-08						Garem1	0.375421	8.51795e-08
Rpl37a	0.355898	1.42669e-42																		Hacd3	0.41073	1.11885e-19										Dcun1d1	0.287427	1.49132e-08						Pik3ca	0.431101	8.78152e-08
Adam10	0.405347	1.64569e-42																		Efl1	0.388276	1.18064e-19										Bsdc1	0.314104	1.59916e-08						Zcchc14	0.302905	8.96098e-08
Psme4	0.423251	1.70756e-42																		Atp6v1h	0.476678	1.18168e-19										Acvr1	0.267975	1.60888e-08						Spen	0.289759	9.9626e-08
Agfg1	0.398751	2.1075e-42																		Cap1	0.404576	1.18972e-19										Rpl32	0.354325	1.6432e-08						Rlf	0.407982	9.97236e-08
Hnrnpul2	0.30318	2.71506e-42																		Eif4g1	0.357944	1.33311e-19										Aebp2	0.264933	1.64464e-08						Bcl9l	0.306342	1.01926e-07
Glrx3	0.270532	3.1167e-42																		Sec24b	0.417118	1.56843e-19										Ndufs6	0.263943	1.65849e-08						F11r	0.333553	1.03245e-07
Faf1	0.333889	4.2527e-42																		Bcr	0.340435	1.59237e-19										Vamp8	0.291761	1.71976e-08						Pnisr	0.411564	1.0428e-07
Prpf38b	0.281623	4.82441e-42																		Rnf4	0.388182	1.5945e-19										Rps23	0.32457	1.76055e-08						Zmym5	0.326357	1.17836e-07
Tomm7	0.310101	5.42521e-42																		Tnks1bp1	0.373252	1.62927e-19										Kdm4c	0.302893	1.79396e-08						Mzt1	0.34083	1.18348e-07
Ssb	0.332955	5.82913e-42																		Hnrnpu	0.38061	1.67774e-19										Ywhaz	0.31007	1.83727e-08						Wdr33	0.3563	1.1985e-07
Tcea1	0.290735	6.17795e-42																		Myo1b	0.688816	1.71326e-19										Rpl36	0.330477	2.29719e-08						Rev1	0.379634	1.27542e-07
Hacd2	0.3163	8.51323e-42																		D230025D16Rik	0.342697	2.19302e-19										Tom1	0.273417	2.32985e-08						Smurf1	0.395557	1.38261e-07
Hnrnpf	0.335973	9.3094e-42																		Arl5a	0.405168	2.27278e-19										Rps10	0.308576	2.36736e-08						Zwint	0.334859	1.42009e-07
Smarca5	0.354703	9.55292e-42																		Smyd3	0.577227	2.30568e-19										Arglu1	0.265258	2.70266e-08						Tmpo	0.375565	1.49678e-07
Pcna	0.30451	1.09552e-41																		Npat	0.346136	2.75945e-19										Rab6a	0.310918	2.8658e-08						Arhgef11	0.315615	1.57064e-07
Cox7b	0.366606	1.20733e-41																		Paxbp1	0.39094	3.09236e-19										Car12	0.255929	2.86889e-08						Arhgef28	0.317037	1.61984e-07
Fto	0.330671	1.22667e-41																		Mfsd6	0.445054	3.48889e-19										Atpif1	0.266086	3.66602e-08						Srpk1	0.329478	1.66412e-07
Mrfap1	0.292669	1.33655e-41																		Phrf1	0.310036	3.54931e-19										Rsrc2	0.28147	4.14208e-08						Map3k5	0.324424	1.66825e-07
Uqcr11	0.332455	1.41239e-41																		Riok2	0.385302	3.55305e-19										Nipbl	0.319358	4.17976e-08						Nr3c1	0.393861	1.67438e-07
Snd1	0.337171	1.58967e-41																		Nasp	0.448909	3.70159e-19										Sumo1	0.315135	4.32619e-08						E130308A19Rik	0.295952	1.7269e-07
Eif3a	0.36253	1.66077e-41																		Mapk1	0.431122	4.13282e-19										Tle4	0.387512	4.6981e-08						Eps15l1	0.366324	1.85842e-07
2410006H16Rik	0.405413	2.08641e-41																		Atg14	0.310885	4.41188e-19										Rpl18	0.303489	4.8252e-08						Map4k5	0.307895	1.87836e-07
Hnrnph3	0.260443	2.13745e-41																		Bcas3	0.454888	4.63273e-19										Rps15a	0.293041	5.01872e-08						Zfp410	0.302842	1.9783e-07
Gm47283	0.396204	2.14331e-41																		Uhrf1bp1l	0.493717	5.05487e-19										Scd1	0.771866	5.04992e-08						Qk	0.440824	2.0086e-07
Rbbp4	0.30889	2.32549e-41																		Tbc1d12	0.415553	5.13894e-19										Tanc2	0.320155	5.10673e-08						Snhg1	0.315689	2.06679e-07
Gpx1	0.393439	3.66649e-41																		Nktr	0.337567	5.86308e-19										Zcchc7	0.277931	5.37517e-08						Metap1	0.362727	2.13608e-07
Ccdc34	0.272467	4.06016e-41																		Mfsd14a	0.378706	6.2185e-19										Rps28	0.283613	5.42507e-08						Emb	0.252606	2.20265e-07
Eif6	0.263741	4.17584e-41																		Usp38	0.355105	6.77665e-19										Btg2	0.430472	5.59256e-08						Erf	0.310803	2.26139e-07
Adnp	0.257342	4.88707e-41																		Arid1a	0.409687	7.84889e-19										Ctnnb1	0.253148	6.03614e-08						Lmna	0.302645	2.28214e-07
Acin1	0.292622	5.25722e-41																		Acvr2a	0.450904	8.16115e-19										Rpl36al	0.267329	6.38791e-08						Dis3l2	0.438786	2.28301e-07
Kmt2a	0.321607	6.12135e-41																		Uchl3	0.352837	8.82185e-19										Hdgf	0.270566	6.44843e-08						Scyl2	0.390492	2.37614e-07
Sipa1l3	0.255695	9.85877e-41																		Fbxo34	0.377309	9.06393e-19										Brwd1	0.352605	6.72453e-08						Schip1	0.443256	2.53786e-07
Btaf1	0.339439	1.02574e-40																		Heca	0.389977	9.11482e-19										Rpl36a	0.270456	7.51162e-08						Esf1	0.310548	2.54083e-07
Pacs1	0.354076	1.17821e-40																		Gab1	0.410949	9.16817e-19										Tnks2	0.315552	7.56643e-08						Vkorc1l1	0.384898	2.54244e-07
Actr3	0.398195	1.54856e-40																		Crebrf	0.430401	1.04075e-18										Setd5	0.304616	7.91492e-08						Klhl7	0.387556	2.67171e-07
Ppp2r5e	0.301854	1.86743e-40																		Auts2	0.362429	1.04722e-18										Pabpn1	0.265863	8.08853e-08						Hadha	0.360272	2.70753e-07
Pds5a	0.326728	4.76809e-40																		Rnf145	0.367474	1.10066e-18										Prkab2	0.258764	9.15524e-08						Lnx2	0.330669	2.74882e-07
Foxj3	0.27464	6.10336e-40																		Arhgef10l	0.655834	1.17387e-18										Eef1a1	0.265317	9.79642e-08						Srsf1	0.292799	3.08006e-07
Hnrnpa1	0.330292	6.19371e-40																		Maf	0.370095	1.26157e-18										Cox5a	0.2572	9.81107e-08						Khdrbs1	0.42158	3.46996e-07
Srp72	0.274058	6.74725e-40																		mt-Atp8	0.324615	1.30571e-18										Nsa2	0.303876	9.90266e-08						Ctif	0.38594	3.53493e-07
Ube3a	0.306985	1.05293e-39																		Picalm	0.375018	1.43425e-18										Smg1	0.263348	1.04037e-07						Lrpprc	0.307543	3.54813e-07
Rptor	0.267346	1.15166e-39																		Galnt18	0.358826	1.47115e-18										Rpl7a	0.267468	1.04605e-07						U2surp	0.375345	3.59061e-07
Sf3b6	0.262785	1.5087e-39																		Naa20	0.404725	1.4911e-18										Arl5a	0.27274	1.19736e-07						Sema3c	0.331672	3.76186e-07
Gapvd1	0.275299	1.89348e-39																		Gnl3	0.482548	1.51943e-18										Sptlc2	0.251996	1.28452e-07						Serpinb8	0.361378	3.82535e-07
Fam120a	0.313051	1.92915e-39																		Calm2	0.463597	1.61716e-18										Gatad2b	0.333365	1.29144e-07						Uhrf1bp1l	0.401938	3.91608e-07
Ehmt1	0.264138	2.18887e-39																		Diaph3	0.549014	1.68819e-18										Kif16b	0.270089	1.50133e-07						Mms19	0.335614	4.45654e-07
Capg	0.305473	2.23644e-39																		Naa30	0.262588	1.74999e-18										Ythdc1	0.311364	1.65085e-07						Mbtps1	0.289747	4.53547e-07
Rtn4	0.449447	3.4316e-39																		Cept1	0.459477	1.91284e-18										Cox5b	0.273689	1.71124e-07						Gnai1	0.278133	4.65064e-07
Tax1bp1	0.351535	3.75401e-39																		Smap1	0.433986	2.15174e-18										Zzz3	0.288674	1.78377e-07						Oga	0.375029	4.7063e-07
Bdp1	0.263321	5.54662e-39																		Atxn3	0.382531	2.19349e-18										Arid1a	0.289867	1.81699e-07						Yy1	0.353798	4.83134e-07
Memo1	0.328906	7.85968e-39																		Brd8	0.36079	2.23511e-18										Tmem234	0.267859	1.86461e-07						H2afv	0.37492	4.90852e-07
Arid1b	0.373852	9.20919e-39																		Npas2	0.374059	2.47886e-18										Tra2b	0.296844	2.32304e-07						Prmt1	0.269661	5.08336e-07
Ndufb9	0.325543	1.2013e-38																		Aatf	0.390122	2.56424e-18										Oxct1	0.273158	2.40253e-07						Fbrsl1	0.337027	5.12015e-07
Snx5	0.271257	1.29561e-38																		Me1	0.522173	2.97983e-18										Lrch3	0.340629	3.06927e-07						Sfmbt1	0.332601	5.27777e-07
Eif3j1	0.263939	1.97318e-38																		Cfl2	0.388159	3.13741e-18										Wdr43	0.269146	3.27795e-07						Aig1	0.546972	5.37246e-07
Eif1a	0.250167	3.05305e-38																		2900026A02Rik	0.280274	3.35331e-18										Wapl	0.270946	3.29041e-07						Metap2	0.272929	5.51323e-07
Rad23b	0.308256	3.382e-38																		Ssh2	0.504178	4.09287e-18										Eef1b2	0.316103	3.65211e-07						Lnpk	0.39881	5.87299e-07
Mapk8	0.295175	3.55951e-38																		Psen1	0.450913	4.11589e-18										Mllt3	0.325601	4.06294e-07						Gspt1	0.319492	5.92216e-07
Zfp148	0.310987	4.13315e-38																		Rbfox2	0.394021	4.33155e-18										Pgls	0.260931	4.45579e-07						Cul2	0.306215	6.11178e-07
Gramd3	0.253333	4.1456e-38																		F3	0.653641	4.91225e-18										Map3k1	0.282755	4.6254e-07						Snrnp48	0.360729	6.40424e-07
Clock	0.318987	4.6916e-38																		Prep	0.348348	5.50344e-18										Ubr3	0.284938	5.13595e-07						Mapk8	0.425859	6.82444e-07
Tcf12	0.35724	4.71216e-38																		Luc7l	0.379642	5.60756e-18										Agfg1	0.284865	5.3629e-07						Oxr1	0.349904	6.90704e-07
Anxa7	0.335986	5.50897e-38																		Pik3ca	0.395299	6.26002e-18										Ankrd11	0.307487	5.55737e-07						Ccl27a	0.789105	7.56726e-07
Large1	0.380881	7.45706e-38																		Usp10	0.273288	6.72346e-18										Ezh2	0.297819	5.96407e-07						Ssh2	0.368032	7.684e-07
Parp8	0.435131	8.30507e-38																		Ube2n	0.405032	6.9457e-18										Rictor	0.344929	6.08212e-07						Capn2	0.380141	7.93085e-07
Cstf3	0.294856	9.41877e-38																		Nrd1	0.362145	7.53095e-18										Arih1	0.275503	7.13385e-07						Cand1	0.339143	8.12927e-07
Atp5h	0.316081	1.13418e-37																		Csrp1	0.53336	7.68834e-18										Hivep2	0.283162	7.50683e-07						Hk2	0.430483	8.37505e-07
Tspo	0.355268	1.43334e-37																		Ahnak	0.339063	9.446e-18										Kdm5a	0.275138	7.61351e-07						Lrch1	0.271382	8.85069e-07
Sarnp	0.252913	1.49108e-37																		Abcd3	0.374477	1.00776e-17										Cast	0.300291	7.75923e-07						Senp2	0.397899	9.2127e-07
Snrpb	0.290541	1.77449e-37																		Ube2d3	0.384051	1.13118e-17										Gsk3b	0.267073	8.875e-07						Nfx1	0.354887	9.33637e-07
Atp5c1	0.333777	1.85735e-37																		Utp18	0.313305	1.14634e-17										Rpl23	0.271684	9.26801e-07						Ddx42	0.443064	9.374e-07
Htt	0.281366	1.94541e-37																		Cand1	0.307612	1.38511e-17										Cox8a	0.268056	1.02545e-06						Tns1	0.409712	9.44936e-07
Efr3a	0.254551	1.98724e-37																		Hr	0.277695	1.55566e-17										Adam10	0.318103	1.11024e-06						Chd1	0.350993	9.69097e-07
Mdh2	0.275266	2.19632e-37																		Fbxl17	0.387133	1.6338e-17										Thoc2	0.270501	1.20714e-06						Camsap1	0.306223	9.96154e-07
Kpna1	0.254339	2.35451e-37																		Hip1r	0.301439	1.63554e-17										Pds5a	0.284766	1.2657e-06						Usp14	0.326455	1.05615e-06
Rad21	0.288776	3.66216e-37																		Hnrnph3	0.372861	1.67664e-17										Pip5k1a	0.276758	1.29883e-06						Kpna1	0.402018	1.07465e-06
Cox7a2	0.326482	4.19768e-37																		Map7d1	0.401697	1.72123e-17										Ncoa1	0.295977	1.30743e-06						G3bp1	0.368816	1.0889e-06
Hbegf	0.265216	4.43939e-37																		Eea1	0.34982	1.87776e-17										Rps11	0.296295	1.35832e-06						Nt5dc3	0.360533	1.1121e-06
Eps15	0.361524	4.47951e-37																		Ube2k	0.389398	1.92342e-17										Kansl1	0.278002	1.57531e-06						Actr1a	0.32835	1.12567e-06
Rcor1	0.340753	4.50274e-37																		Epn2	0.369175	1.98931e-17										Rps6	0.296728	2.02706e-06						Matr3	0.316624	1.1373e-06
Kat6b	0.266107	4.70443e-37																		Pam	0.330206	2.33899e-17										Cnot4	0.293004	2.13682e-06						Ccnt2	0.338132	1.15815e-06
Ipmk	0.288472	5.95825e-37																		Snrnp70	0.347626	2.37335e-17										Atxn2	0.312439	2.1577e-06						Ext1	0.288657	1.26623e-06
Mtus1	0.310091	7.02043e-37																		Dusp7	0.297985	2.50716e-17										Rpl3	0.281441	2.42697e-06						Naa25	0.285844	1.37349e-06
Prpf40a	0.341391	1.1098e-36																		Tent4b	0.482557	2.56946e-17										Syncrip	0.260935	2.43344e-06						Taok1	0.277297	1.46412e-06
Evi5	0.254312	1.40032e-36																		Jag1	0.326199	2.64783e-17										Cnot6	0.259044	2.45903e-06						Egr1	0.673221	1.49481e-06
Uqcr10	0.33817	2.33538e-36																		mt-Nd6	0.319698	2.81712e-17										Zdhhc20	0.290495	2.52166e-06						Vezt	0.286469	1.5147e-06
Ndufs6	0.250416	3.01985e-36																		Oxct1	0.385808	3.04316e-17										Rpl10	0.269517	2.8419e-06						Btg3	0.450003	1.54233e-06
Xpo1	0.274369	3.57108e-36																		Ccnl2	0.359171	3.08743e-17										Smad2	0.257673	2.94022e-06						Lrig2	0.291174	1.62456e-06
Uqcrh	0.322943	9.10704e-36																		Kif1b	0.374958	3.27267e-17										Rps27	0.254769	3.20744e-06						Siah1a	0.321743	1.75862e-06
Nsd2	0.267572	1.30946e-35																		4930523C07Rik	0.487493	3.37416e-17										Rpl18a	0.294745	3.24152e-06						Rptor	0.314025	1.82689e-06
Myo1b	0.307525	1.42549e-35																		Asxl2	0.402303	3.43717e-17										Rpl35a	0.257465	3.316e-06						Crebrf	0.39909	1.91935e-06
Rictor	0.345043	2.12278e-35																		Cdc27	0.412372	3.66557e-17										Rpl27	0.262905	3.35551e-06						Dnajc1	0.431601	2.00911e-06
Btbd1	0.255712	2.17914e-35																		Ltbp1	0.551578	3.81039e-17										Pdcd6ip	0.278834	3.41947e-06						Prkch	0.323869	2.05281e-06
Tpt1	0.30367	2.33698e-35																		Tnfaip8	0.397731	4.42471e-17										Zbtb11	0.255871	3.96783e-06						Clic4	0.331851	2.06525e-06
Tlk2	0.30549	2.68851e-35																		Map3k7	0.381754	4.60617e-17										Btf3	0.262597	4.66744e-06						Gtf3c1	0.268238	2.12189e-06
Atp5g3	0.292195	3.2653e-35																		Zfp266	0.400513	4.64929e-17										Uba6	0.300522	6.04583e-06						Hipk3	0.381162	2.44543e-06
Pum2	0.362738	3.33233e-35																		Pou2f3	0.347925	4.86747e-17										Sptssa	0.331896	6.39341e-06						Papola	0.32869	2.58181e-06
Sf3b2	0.262625	3.60301e-35																		Rsbn1	0.428168	5.09175e-17										Usp47	0.254997	7.25649e-06						Phc2	0.292625	2.58682e-06
Atp5k	0.250937	9.4996e-35																		Il6ra	0.393805	5.11925e-17										Nfkbiz	0.254437	8.56684e-06						Taf4	0.311543	2.64685e-06
Eif4h	0.278639	1.06419e-34																		Lrig2	0.336712	5.21467e-17										Btbd7	0.253977	8.65883e-06						8030462N17Rik	0.271037	2.68035e-06
Gsk3b	0.352397	1.13342e-34																		Kdm3b	0.3778	5.61294e-17										Nedd4l	0.428799	9.44916e-06						Zfp277	0.295649	2.73801e-06
Mif	0.317695	1.28088e-34																		Dgcr2	0.322736	6.44668e-17										Rpsa	0.259359	1.08532e-05						Adam10	0.355319	2.9348e-06
Timm13	0.283222	1.65597e-34																		Zfp410	0.297022	6.47788e-17										March3	0.266311	1.22016e-05						Cers5	0.366994	2.95027e-06
Srrm1	0.281687	2.16599e-34																		Lmtk2	0.363649	6.52799e-17										Rab14	0.270782	1.26707e-05						Arhgap24	0.421629	2.98059e-06
Nmt2	0.255928	3.09703e-34																		Fgd6	0.449545	6.62348e-17										Fosb	0.262155	1.73198e-05						Suz12	0.33711	3.2613e-06
Cnot4	0.379088	4.31529e-34																		Pdzd2	0.325595	7.2855e-17										Ncoa6	0.272509	2.18132e-05						Focad	0.289516	3.31735e-06
Ly6d	0.286699	5.50443e-34																		Mpp5	0.477933	7.52659e-17										Ankrd17	0.352787	2.21621e-05						Smad2	0.316088	3.43741e-06
Rreb1	0.277682	5.75136e-34																		Ror1	0.421881	7.67128e-17										Gas5	0.250369	2.68138e-05						Srsf6	0.286588	3.55514e-06
Rbm3	0.354199	7.08659e-34																		Hipk1	0.408379	8.2062e-17										Prrc2c	0.266608	2.79121e-05						Mid1	0.4073	3.68819e-06
Purb	0.290108	1.5732e-33																		Eif4a2	0.365331	8.22544e-17										Eif3f	0.257563	4.29406e-05						Rad21	0.327567	3.78446e-06
Prnp	0.26408	1.62266e-33																		Rsrc1	0.399437	8.3214e-17										Psme4	0.312007	0.000108891						Fam172a	0.351698	3.87635e-06
Ran	0.301957	2.16835e-33																		Sertad2	0.465367	9.03956e-17										Cox6b1	0.276495	0.000261825						Kdm4c	0.36648	3.90677e-06
Phip	0.290531	2.40659e-33																		Ipo11	0.321988	9.06909e-17										Krt15	0.540698	0.000379281						Fbxo42	0.376484	3.91019e-06
Pbx1	0.301904	4.56792e-33																		Zfp644	0.422403	9.0807e-17										Susd6	0.324245	0.00117623						Styx	0.324311	3.94416e-06
Pabpn1	0.291209	5.31693e-33																		Fyttd1	0.391183	9.30446e-17										Agpat4	0.314776	0.00131368						Rsbn1l	0.378202	3.94629e-06
Psmb1	0.265612	6.17196e-33																		Riok3	0.317512	1.04416e-16										Apoe	0.298935	0.00185624						Rsrc2	0.327401	4.00328e-06
Nme2	0.303118	6.75301e-33																		Pdcd6ip	0.371366	1.06188e-16										Fos	0.315904	0.0031576						Rab14	0.260755	4.05595e-06
Abracl	0.281033	7.01421e-33																		Stx3	0.398261	1.1032e-16										Sprr1b	0.467379	0.258208						Kremen1	0.357881	4.06807e-06
Cab39	0.31072	9.54076e-33																		Rab1a	0.345855	1.18155e-16																		Pqlc1	0.290238	4.08079e-06
Atad2	0.291034	1.22151e-32																		Vopp1	0.383415	1.18458e-16																		Ube2r2	0.334879	4.42907e-06
Khdrbs1	0.277402	1.23948e-32																		Ctdspl	0.314032	1.23624e-16																		Btbd1	0.398392	4.48661e-06
Tsc22d2	0.283068	2.7219e-32																		Hsf2	0.436157	1.24803e-16																		Gatad2a	0.343287	4.6649e-06
Zfp91	0.289317	5.19987e-32																		Camk2d	0.432587	1.25967e-16																		Hspd1	0.347466	4.78879e-06
Yy1	0.264604	1.20049e-31																		Srsf2	0.353661	1.32977e-16																		Cbx3	0.324635	4.79475e-06
Rheb	0.300268	1.8593e-31																		Ripk2	0.463054	1.35097e-16																		Suclg2	0.262922	4.82083e-06
Dnajc1	0.306468	1.8775e-31																		Usp14	0.439845	1.64846e-16																		Parva	0.284348	4.82341e-06
Rps29	0.287931	2.17057e-31																		Tnpo3	0.401393	1.77815e-16																		Rmnd5a	0.297657	4.96747e-06
Atp5d	0.291978	2.41735e-31																		Syncrip	0.37111	1.84321e-16																		Rfc1	0.259165	5.30502e-06
Pan3	0.332891	2.50436e-31																		Ddr1	0.276553	1.93821e-16																		Myo18a	0.314862	5.42817e-06
Rab22a	0.2866	2.91715e-31																		Prpf4b	0.394084	2.19514e-16																		B3galnt2	0.297036	5.64491e-06
Srsf11	0.313919	2.97033e-31																		Fbxo42	0.361302	2.22851e-16																		Ssb	0.324161	5.66051e-06
Huwe1	0.34154	3.45136e-31																		Mllt10	0.405892	2.67833e-16																		Zfp655	0.313847	5.68244e-06
Dnajb1	0.254677	3.59971e-31																		Chd6	0.405706	2.73053e-16																		Slc25a25	0.436191	5.72598e-06
Fam49b	0.278537	4.07792e-31																		Gmeb2	0.370267	4.09889e-16																		Mga	0.303292	5.74764e-06
Pak3	0.272721	5.50258e-31																		Dop1a	0.300549	4.39953e-16																		Fer	0.290199	5.78561e-06
Arl8b	0.271432	6.51361e-31																		Gja1	0.373516	5.08635e-16																		Ankrd13c	0.33228	5.8038e-06
Atp5j	0.29547	8.44415e-31																		Cdk13	0.394272	5.87525e-16																		Srcap	0.31236	6.64001e-06
Fxr1	0.251785	1.09052e-30																		Usp4	0.335959	6.51289e-16																		Bag4	0.277851	6.75457e-06
Rap2b	0.254625	1.22701e-30																		Kat6b	0.369432	7.01654e-16																		Map4k3	0.259808	7.0085e-06
Tgfbr1	0.271017	1.33004e-30																		Pcyt2	0.312352	7.21117e-16																		Ormdl3	0.266337	7.11048e-06
Srrm2	0.291676	1.50592e-30																		Kazn	0.319071	7.65388e-16																		Brd4	0.294403	7.26637e-06
Atp5g2	0.2916	1.76571e-30																		Eml4	0.384572	7.7062e-16																		Pprc1	0.302381	7.28068e-06
Atp5l	0.286714	1.90108e-30																		Ubp1	0.383006	7.89859e-16																		Cbx5	0.257521	7.36366e-06
Bzw1	0.284525	1.94041e-30																		Mapk8	0.389501	8.51975e-16																		Lbr	0.268916	7.67792e-06
Wac	0.354527	2.28934e-30																		Nol10	0.292197	1.04697e-15																		Slc39a10	0.266069	7.70973e-06
Pkn2	0.277662	3.10876e-30																		Lin54	0.346052	1.10646e-15																		Wdr47	0.315114	8.01135e-06
Atp13a3	0.320962	3.37989e-30																		R3hdm1	0.40951	1.18602e-15																		Ammecr1	0.296677	8.0731e-06
Lrch3	0.3512	3.61348e-30																		Styx	0.319574	1.21878e-15																		Gnl2	0.278927	8.21487e-06
Vapa	0.321048	3.68345e-30																		Ptprj	0.311558	1.3143e-15																		Lancl1	0.260806	8.92582e-06
Rb1cc1	0.297406	5.17743e-30																		Sdc1	0.257638	1.39644e-15																		Ube2k	0.324237	8.95004e-06
Ube2g1	0.3585	5.47458e-30																		Hmgcr	0.392468	1.48139e-15																		D230025D16Rik	0.376778	8.95898e-06
Gigyf2	0.250322	7.22701e-30																		Tspan3	0.471779	1.57934e-15																		Ube2e2	0.379323	9.05671e-06
Plec	0.31527	9.60295e-30																		Klhl18	0.327481	1.61714e-15																		Hivep1	0.333446	9.37258e-06
Atxn2	0.308893	1.05638e-29																		Ogdh	0.415132	1.63122e-15																		Xpo4	0.291495	9.81295e-06
Mat2a	0.293712	1.15569e-29																		Rnf111	0.396082	1.66403e-15																		Mia2	0.26195	1.01012e-05
H2afz	0.37886	1.24119e-29																		Rheb	0.387699	1.77653e-15																		Phf3	0.319027	1.01691e-05
Cox6c	0.279598	1.6239e-29																		Anxa11	0.35373	1.82581e-15																		Vti1a	0.420651	1.02959e-05
Ckap5	0.257439	2.73652e-29																		Abcf1	0.35906	1.85742e-15																		Cdv3	0.273405	1.06412e-05
Gatad2b	0.284671	3.32019e-29																		Ubqln1	0.331422	1.91183e-15																		Bcl2l13	0.275291	1.06421e-05
Ywhaz	0.284179	3.4183e-29																		Zmym2	0.394855	2.13208e-15																		Aggf1	0.282821	1.08487e-05
Hint1	0.303628	3.5259e-29																		Zfp800	0.370544	2.43474e-15																		Sp1	0.282561	1.1106e-05
Ppp2r2a	0.282843	3.98295e-29																		Actr1a	0.375175	2.48351e-15																		Elf2	0.351183	1.11687e-05
Cox5a	0.254903	4.3355e-29																		Lima1	0.42308	2.48746e-15																		Met	0.290095	1.13013e-05
Tnpo1	0.279202	4.88154e-29																		Gatad2a	0.42698	2.58544e-15																		Fam91a1	0.309668	1.21716e-05
Glud1	0.266141	9.9434e-29																		Arpc1a	0.369768	2.60924e-15																		Lcorl	0.440032	1.27138e-05
Fau	0.27413	1.62041e-28																		Phf3	0.356961	2.85721e-15																		mt-Atp8	0.286243	1.27792e-05
Eif4g2	0.269121	2.26941e-28																		Snrnp48	0.362264	3.38009e-15																		Nlrc5	0.358861	1.28151e-05
Dnajc5	0.263658	5.48241e-28																		Zfr	0.398121	3.48567e-15																		Cab39	0.362281	1.32967e-05
Caprin1	0.269391	9.00231e-28																		Cacul1	0.358446	3.79197e-15																		Hnrnpa3	0.294701	1.3753e-05
Ncapg2	0.250486	1.52707e-27																		Tnpo1	0.421124	3.86153e-15																		Prkag2	0.266658	1.44369e-05
Bmpr2	0.292567	1.90465e-27																		Kmt2a	0.424561	3.92638e-15																		Sipa1l3	0.29855	1.47954e-05
Ythdc1	0.250595	2.92552e-27																		Afap1	0.332877	4.00518e-15																		Vapa	0.293728	1.53967e-05
Celf1	0.301286	3.16809e-27																		Ilrun	0.325792	4.15394e-15																		Uck2	0.290537	1.57046e-05
Smap1	0.250983	4.81261e-27																		Taok1	0.330856	4.17914e-15																		Ppp2cb	0.302633	1.59485e-05
Pabpc1	0.261732	6.17389e-27																		Bcas2	0.351289	4.18155e-15																		Smc5	0.307077	1.60791e-05
Bcas3	0.251632	7.16077e-27																		Atp6v0a2	0.342657	4.82098e-15																		Vps37a	0.344483	1.61309e-05
Birc6	0.281293	1.1886e-26																		Supt16	0.363061	5.24295e-15																		Katnbl1	0.334529	1.64541e-05
Rab10	0.285533	1.37983e-26																		Etv3	0.274354	5.25276e-15																		Insig2	0.317427	1.75159e-05
Psmd11	0.277577	2.41351e-26																		Etf1	0.386081	5.25453e-15																		Rab10	0.308687	1.77347e-05
Wasf2	0.285247	3.79153e-26																		Atp11a	0.317528	5.52557e-15																		Exoc5	0.320616	1.81928e-05
Cast	0.296861	6.27656e-26																		Zfp280d	0.371447	7.08293e-15																		Mlxip	0.377351	1.90664e-05
Desi2	0.275201	1.20442e-25																		Pitpnb	0.34219	7.2821e-15																		Pdxdc1	0.348515	1.9345e-05
Papola	0.268955	4.50653e-25																		Gm20732	0.26732	8.09673e-15																		Phkb	0.299906	1.9621e-05
Adamts1	0.287652	1.26129e-24																		Snx13	0.35036	8.47817e-15																		Trim24	0.453793	2.02467e-05
Ash1l	0.261393	5.49913e-24																		Spaca6	0.366989	9.41532e-15																		Evi5	0.371221	2.05185e-05
Erbin	0.271958	6.26099e-24																		Nek7	0.383735	9.50998e-15																		Dusp7	0.280193	2.12514e-05
Ybx1	0.264985	9.10366e-24																		Kctd9	0.276282	9.71083e-15																		Ccnt1	0.311799	2.14017e-05
Smurf2	0.257149	1.18255e-23																		Jmy	0.28841	1.01417e-14																		Spidr	0.250391	2.15349e-05
Pdlim5	0.336958	1.28841e-23																		Gm49336	0.360574	1.03328e-14																		Rora	0.422493	2.17621e-05
Cox7a2l	0.252985	2.18873e-23																		Car12	0.308387	1.07327e-14																		Ube2j1	0.433848	2.18406e-05
Elf1	0.251721	2.80534e-23																		6720427I07Rik	0.342909	1.15894e-14																		Kat7	0.336492	2.24571e-05
Ncoa2	0.259454	4.44757e-23																		Fosl1	0.350801	1.16075e-14																		Brix1	0.264804	2.26978e-05
B4galt1	0.255639	6.60458e-23																		Smarcc1	0.340423	1.22203e-14																		Khdc4	0.293242	2.28883e-05
Klf12	0.406787	5.06975e-21																		Krt1	0.252527	1.24482e-14																		Mink1	0.319055	2.33444e-05
Slc4a7	0.263207	3.07585e-18																		Tgfbr1	0.425301	1.29768e-14																		Tulp4	0.310328	2.37236e-05
Tubb5	0.374177	6.10459e-16																		Zfp407	0.347546	1.30641e-14																		Phf14	0.356822	2.40925e-05
S100a6	0.264626	4.06588e-07																		Ccser2	0.446746	1.32347e-14																		Zmym4	0.348279	2.48471e-05
																				Srsf3	0.347319	1.36009e-14																		Zc3h13	0.341322	2.4936e-05
																				Fto	0.41464	1.36158e-14																		Rap1gds1	0.326382	2.80057e-05
																				Ncbp1	0.270887	1.74093e-14																		Bcas2	0.297852	2.84385e-05
																				Tmem170b	0.256513	1.81331e-14																		Mark4	0.322019	2.90452e-05
																				Blnk	0.500187	1.84188e-14																		Cdc27	0.307224	3.12862e-05
																				Osmr	0.281165	2.00984e-14																		Foxo3	0.296576	3.20514e-05
																				Pias2	0.377583	2.06056e-14																		Vps54	0.293742	3.27553e-05
																				Vps37a	0.345956	2.33849e-14																		Ski	0.319467	3.29175e-05
																				Carnmt1	0.284746	2.52701e-14																		N4bp2l2	0.271733	3.40827e-05
																				Micall1	0.33824	2.8172e-14																		Mfn1	0.34598	3.52152e-05
																				Cttn	0.310469	3.63683e-14																		Chka	0.459887	3.54377e-05
																				Erp44	0.38312	4.82409e-14																		Atf2	0.286208	3.64469e-05
																				Sos1	0.400221	5.28568e-14																		Ralgds	0.346479	3.72835e-05
																				Qrich1	0.344962	5.75371e-14																		Acer3	0.31147	3.73332e-05
																				Ino80d	0.376818	7.32334e-14																		Snd1	0.281853	3.7341e-05
																				Adam17	0.337025	8.00052e-14																		Cebpz	0.257426	3.76679e-05
																				Atp8b1	0.261453	8.17039e-14																		Brd7	0.300313	3.94227e-05
																				March6	0.310176	8.69799e-14																		Srsf5	0.274939	4.2437e-05
																				Gtpbp4	0.321298	8.83893e-14																		Pex5	0.293302	4.34073e-05
																				Etfdh	0.346612	9.31219e-14																		Luc7l	0.306708	4.56983e-05
																				Crebzf	0.26736	9.47749e-14																		Clk4	0.315704	4.71316e-05
																				Tmpo	0.305586	9.60965e-14																		Rsrc1	0.325205	4.99123e-05
																				Stxbp5	0.3375	9.74086e-14																		Fam83g	0.276071	5.02393e-05
																				Clint1	0.436475	1.05596e-13																		Nipal2	0.354941	5.07602e-05
																				Rsbn1l	0.363232	1.11184e-13																		Rnf216	0.307224	5.08856e-05
																				Mob1b	0.317387	1.14471e-13																		Sirt1	0.375488	5.44456e-05
																				Adamts1	0.425878	1.26353e-13																		Ckap5	0.320217	5.4639e-05
																				Fam91a1	0.332288	1.30941e-13																		Bok	0.256614	6.26943e-05
																				Cul2	0.313947	1.37977e-13																		Kdm5c	0.381157	6.29064e-05
																				Hipk3	0.389079	1.41321e-13																		Csnk1d	0.322879	6.82798e-05
																				Lcor	0.325	1.46478e-13																		Rad23b	0.287293	7.15539e-05
																				Cdh13	0.467166	1.53452e-13																		Tspan5	0.321324	7.22461e-05
																				Ppp6c	0.354392	1.61454e-13																		Smad3	0.364977	7.25133e-05
																				Brix1	0.299771	1.70274e-13																		Itprid2	0.267207	7.27292e-05
																				Nsf	0.518111	1.90505e-13																		Jun	0.422194	7.3061e-05
																				Katna1	0.338177	2.05731e-13																		Epha2	0.250622	7.34781e-05
																				Sf3b1	0.308265	2.10302e-13																		Tob1	0.286855	7.35788e-05
																				Hspa9	0.335218	2.19619e-13																		Rangap1	0.282723	7.81844e-05
																				Pqlc1	0.33937	2.30513e-13																		Slc4a7	0.384861	8.01285e-05
																				Rcl1	0.312905	2.75454e-13																		Sertad2	0.454268	8.43164e-05
																				Uck2	0.408381	2.80325e-13																		Rell1	0.418411	8.52292e-05
																				Hbs1l	0.35227	2.99174e-13																		Tshz1	0.265959	8.60251e-05
																				Dcun1d1	0.342091	3.03343e-13																		Fnbp4	0.363095	8.66377e-05
																				Hif1a	0.352879	3.0722e-13																		Tom1l2	0.374788	8.8643e-05
																				Rev1	0.388264	3.39461e-13																		Glg1	0.330307	9.13605e-05
																				Ep400	0.38476	3.72409e-13																		Bag3	0.312701	9.33091e-05
																				Senp7	0.294457	3.84795e-13																		Brd1	0.342037	9.49648e-05
																				Khdrbs1	0.377515	3.9638e-13																		Atxn7l1	0.29076	9.54403e-05
																				Maco1	0.353977	4.01883e-13																		Hacd2	0.29689	9.80677e-05
																				Rab14	0.308405	4.0219e-13																		Ptpn9	0.290932	9.81753e-05
																				Acot9	0.345888	4.12344e-13																		Tpr	0.261039	0.000100505
																				Zranb1	0.373028	4.1454e-13																		Uty	0.317274	0.000100813
																				Nr2c2	0.353391	4.14707e-13																		Aatf	0.327833	0.000104713
																				Brd1	0.357693	4.33738e-13																		Bicral	0.306893	0.000104933
																				Zswim6	0.366258	4.91058e-13																		Mark2	0.276649	0.000109371
																				Sacm1l	0.331799	5.48828e-13																		Dnm1l	0.309755	0.000109452
																				Cdc73	0.373606	5.54218e-13																		Mob1b	0.317941	0.000109822
																				Suz12	0.397556	6.12912e-13																		Xpo6	0.340123	0.00011086
																				Chd1	0.336823	6.28931e-13																		Homer1	0.280807	0.000113063
																				Banp	0.335939	6.54681e-13																		Ube2e3	0.340396	0.000114046
																				Bsdc1	0.34255	6.70217e-13																		Chchd3	0.330496	0.00011632
																				Prkar2a	0.258079	6.98189e-13																		Fbln1	0.262478	0.000124131
																				Dcun1d3	0.425433	7.26622e-13																		Ubash3b	0.450108	0.000132907
																				Arid4a	0.27809	7.63427e-13																		Rc3h1	0.36796	0.000143644
																				Hipk2	0.300683	9.03052e-13																		Ncoa2	0.361099	0.000145882
																				Prpf18	0.28823	9.90466e-13																		Tomm70a	0.286213	0.000158054
																				Ube2b	0.286748	9.92891e-13																		Xpo1	0.329334	0.00016298
																				Csnk1g3	0.302272	9.94242e-13																		Trappc10	0.294372	0.000166389
																				Map3k5	0.360972	1.05565e-12																		Atf3	0.63047	0.000170213
																				Pfkp	0.301907	1.09337e-12																		Ccnl2	0.311897	0.00017794
																				Zc3h13	0.373201	1.12757e-12																		Chd9	0.294555	0.000180041
																				Fam172a	0.380729	1.13313e-12																		Mtmr12	0.335085	0.000183578
																				Tent5a	0.316982	1.13695e-12																		Ythdf2	0.328533	0.00018454
																				Atg4b	0.307564	1.1421e-12																		Plekha1	0.338659	0.000187867
																				Luc7l2	0.303242	1.20279e-12																		Bod1l	0.291167	0.000189292
																				Samd8	0.346472	1.20645e-12																		Synj2bp	0.273882	0.000191236
																				Strbp	0.323848	1.33994e-12																		Atrn	0.364155	0.000201199
																				Elf2	0.301893	1.35818e-12																		Smim13	0.273905	0.000203137
																				Arglu1	0.333371	1.40224e-12																		Mtus1	0.320208	0.000208067
																				Chd9	0.32859	1.44352e-12																		Cdip1	0.263321	0.000212892
																				Ptpn11	0.318079	1.51327e-12																		Hat1	0.277173	0.000232618
																				Ilf3	0.353783	1.56294e-12																		Sec24b	0.30227	0.000236231
																				Mms19	0.315305	1.56303e-12																		Ascc3	0.268617	0.000246275
																				Zfp207	0.295487	1.68907e-12																		Snx27	0.281351	0.000259551
																				Fbxo3	0.291269	1.69075e-12																		Wdr70	0.313015	0.000292586
																				Slc7a6	0.34238	1.86845e-12																		Grpel2	0.261015	0.000307668
																				Mapkbp1	0.391533	1.90002e-12																		Nsd1	0.292696	0.000308069
																				Tpm1	0.499469	1.90684e-12																		Mtch2	0.259109	0.000319407
																				Smo	0.31292	2.05092e-12																		Zfp266	0.257641	0.000319679
																				Qser1	0.388377	2.05709e-12																		Usp6nl	0.343815	0.000330084
																				Hdac4	0.288266	2.07057e-12																		Mtdh	0.261523	0.000332601
																				Pde4b	0.39995	2.17485e-12																		Scaper	0.274401	0.000332706
																				Tmem41b	0.290993	2.18954e-12																		Slc12a2	0.411611	0.000338436
																				Bach1	0.326603	2.3029e-12																		Papss1	0.25136	0.000348452
																				Bptf	0.303829	2.3361e-12																		Map4	0.364079	0.000353299
																				Pbx1	0.278385	2.44681e-12																		Ddx46	0.274116	0.000376315
																				Vps50	0.2977	2.5842e-12																		Ilrun	0.268378	0.000405376
																				A930015D03Rik	0.287051	3.00573e-12																		Ggnbp2	0.307482	0.000406545
																				Nfatc3	0.333159	3.19245e-12																		Shroom4	0.306763	0.000427045
																				Vps26a	0.300195	3.35072e-12																		Nono	0.253077	0.000437029
																				Rnf38	0.417033	3.45247e-12																		Ube2e1	0.353845	0.00043765
																				Mast2	0.42753	3.53395e-12																		Ksr1	0.307154	0.000465108
																				Pex13	0.330731	3.67664e-12																		Got2	0.273701	0.000467426
																				Rad51b	0.409207	3.91952e-12																		Nrf1	0.302159	0.000494113
																				Fbxo33	0.336488	3.98814e-12																		4932438A13Rik	0.338824	0.000494964
																				Psmd14	0.391752	3.99977e-12																		Dag1	0.266985	0.000502203
																				Amd1	0.318309	4.16634e-12																		Utp18	0.329185	0.000513638
																				Tdrd3	0.310378	4.50198e-12																		Tgfbr1	0.378449	0.000547647
																				Zdhhc20	0.354817	4.55556e-12																		Dnajc21	0.271012	0.000572181
																				Sowahc	0.256989	4.60474e-12																		Tm9sf2	0.289744	0.000614517
																				Bcl6	0.251015	5.13081e-12																		Setd7	0.276516	0.000651533
																				Mboat2	0.807949	5.38196e-12																		Hnrnpl	0.285641	0.000665324
																				Ugcg	0.64494	5.48846e-12																		Sept9	0.263375	0.000683303
																				Ccnt1	0.359713	5.50918e-12																		Abce1	0.260797	0.000697575
																				Edem3	0.300251	6.85175e-12																		Ahnak2	0.273509	0.000706059
																				Ilf2	0.331585	6.8951e-12																		Cpne1	0.278798	0.000713364
																				Cog5	0.322886	6.89911e-12																		Ikzf2	0.347251	0.000724645
																				Smarca4	0.303771	7.02937e-12																		Fip1l1	0.278835	0.000751077
																				Gnl2	0.28838	7.22248e-12																		Thoc2	0.301572	0.000752759
																				Atrn	0.362389	7.29136e-12																		Eif4a2	0.267522	0.000801838
																				Rbbp8	0.625609	7.30967e-12																		Ss18	0.252648	0.000883987
																				Ehmt1	0.324098	7.90856e-12																		E2f3	0.310751	0.000900369
																				Wsb1	0.304822	8.15405e-12																		Spast	0.255246	0.000925686
																				Capza1	0.254977	8.16399e-12																		Dnmt1	0.294494	0.00098576
																				Pwwp2a	0.265	8.38037e-12																		Add3	0.274432	0.000992375
																				Brd7	0.291841	8.49653e-12																		Fam117b	0.337916	0.00101156
																				Ctif	0.339868	8.59579e-12																		Il1rl2	0.293484	0.00106487
																				Pdxdc1	0.369222	8.9194e-12																		Ddi2	0.30297	0.00107038
																				Emsy	0.36912	9.19268e-12																		Scamp1	0.258102	0.00107897
																				Stk40	0.311301	9.47524e-12																		Gigyf1	0.264131	0.00132314
																				Atp2a2	0.326787	9.5871e-12																		Prdm10	0.320322	0.00135746
																				Dync1li1	0.30994	9.72595e-12																		Aak1	0.3235	0.00136978
																				Naa16	0.331354	1.01434e-11																		Thoc1	0.259362	0.0013769
																				Rell1	0.341902	1.04619e-11																		Slc6a6	0.732758	0.00138549
																				Abl2	0.337708	1.06022e-11																		Topors	0.261269	0.00141339
																				Hnrnph1	0.307129	1.06406e-11																		Glud1	0.285706	0.00143275
																				Immp2l	0.463765	1.11759e-11																		Ap1g1	0.26013	0.0015522
																				Ckap5	0.307231	1.17249e-11																		Akirin2	0.254553	0.00157188
																				Slco2a1	0.438891	1.24424e-11																		Hdac8	0.370408	0.00163339
																				Zmynd11	0.378856	1.24789e-11																		March6	0.280956	0.00167254
																				Cyth3	0.324975	1.25207e-11																		Tfdp1	0.275169	0.00188128
																				Zfp277	0.28344	1.45528e-11																		Cacna1c	0.595084	0.00194351
																				Zfp217	0.267655	1.46212e-11																		Rnf115	0.371206	0.00198073
																				Ppp4r2	0.322118	1.47947e-11																		Herc1	0.254095	0.00220771
																				Krt15	0.277009	1.86537e-11																		Kcmf1	0.297405	0.00233795
																				Wipi2	0.283417	1.89664e-11																		Nudcd3	0.253569	0.0023895
																				Dnajc7	0.292709	1.98133e-11																		Htt	0.292827	0.00258576
																				Fam120a	0.331701	2.01916e-11																		Npm1	0.25209	0.00265127
																				Srsf5	0.307716	2.11793e-11																		Ncoa6	0.274699	0.00272104
																				Dnajc13	0.383321	2.26221e-11																		Smad4	0.314054	0.00279048
																				Rad21	0.299878	2.27592e-11																		Pak1	0.478921	0.0028738
																				Vgll4	0.40524	2.30565e-11																		Capn7	0.320696	0.00301738
																				Evi5	0.373278	2.32862e-11																		Cct4	0.252256	0.00303212
																				Mob4	0.335601	2.3633e-11																		Ccn1	0.514108	0.00316322
																				Usf3	0.308957	2.5894e-11																		Retreg3	0.277577	0.00321671
																				Tpd52l2	0.276151	2.59232e-11																		Zfand6	0.2889	0.00352004
																				Tet3	0.304185	2.68091e-11																		Ccser2	0.318593	0.00362529
																				Rapgef2	0.329865	2.84023e-11																		Kif1b	0.304068	0.00363299
																				Csde1	0.266585	3.18921e-11																		Gls	0.330568	0.00364721
																				Aff4	0.285806	3.24471e-11																		Fut8	0.346152	0.00378954
																				Gpd2	0.291536	3.28673e-11																		Rufy3	0.386396	0.00381214
																				Ptbp2	0.31399	3.48719e-11																		Ino80d	0.344206	0.0038509
																				Crybg3	0.275877	3.91392e-11																		Lmbrd2	0.256195	0.00388745
																				Adk	0.327234	3.92241e-11																		Api5	0.310349	0.00397283
																				Brd4	0.271656	3.95213e-11																		Anks1	0.259086	0.00400103
																				Sec63	0.365029	4.19391e-11																		Zfp948	0.265448	0.00441583
																				Zfx	0.301857	4.44488e-11																		Aebp2	0.274187	0.00443481
																				Cul1	0.38936	4.65384e-11																		Acaca	0.323581	0.00460592
																				Ube4b	0.293027	4.76677e-11																		Togaram1	0.298684	0.00470989
																				Abtb2	0.737256	4.91491e-11																		Atg2b	0.271164	0.0050815
																				Ttc14	0.30612	5.53539e-11																		Rarg	0.280823	0.00511744
																				Dtx2	0.277248	5.56487e-11																		Anapc5	0.26277	0.00524688
																				Pgrmc2	0.260436	6.09217e-11																		Dmxl1	0.270342	0.0053706
																				Xpr1	0.419272	6.42131e-11																		Serinc5	0.288259	0.00540275
																				Susd6	0.338536	6.50868e-11																		Reep3	0.310237	0.005469
																				Irf2	0.315101	6.81168e-11																		Myo1b	0.420003	0.0056812
																				Yy1	0.26262	7.37804e-11																		Stag2	0.272337	0.00569724
																				Thoc1	0.275916	7.67926e-11																		Riok1	0.327894	0.00584501
																				Rprd1a	0.259277	7.97187e-11																		Supt5	0.265704	0.00617128
																				Areg	0.31573	8.26426e-11																		Atp9b	0.250623	0.00653249
																				Heatr3	0.251412	8.38831e-11																		Pip5k1a	0.27186	0.00738925
																				Ide	0.298968	8.87312e-11																		Heca	0.31471	0.00742087
																				Abce1	0.289036	1.06479e-10																		Uqcrc1	0.255973	0.00749978
																				Diaph2	0.317726	1.09666e-10																		Fars2	0.325912	0.00755439
																				Prrc2b	0.316644	1.12787e-10																		Klf9	0.301207	0.007715
																				Xpo1	0.395942	1.14831e-10																		Slain2	0.366321	0.00771809
																				Traf6	0.325859	1.19715e-10																		Dgcr2	0.278767	0.00795966
																				Smurf1	0.397624	1.22808e-10																		Larp4b	0.252885	0.00830529
																				Ube2r2	0.323399	1.2723e-10																		Mapk8ip3	0.266734	0.0087342
																				Dcaf6	0.356519	1.29305e-10																		Csnk1g3	0.255077	0.00903009
																				Nxf1	0.286881	1.33113e-10																		Nfatc3	0.288397	0.00937418
																				Rab5a	0.32912	1.4179e-10																		Rb1	0.373178	0.00940895
																				Hk2	0.283101	1.61217e-10																		Pou2f1	0.274126	0.0096651
																				Srcap	0.300125	1.66775e-10																		March5	0.265947	0.0113338
																				Rab3gap2	0.278231	1.68527e-10																		Sae1	0.258657	0.0115325
																				Arfgef1	0.28501	1.69775e-10																		Mfsd14a	0.271562	0.0119734
																				E330009J07Rik	0.266088	1.77527e-10																		Copg2	0.260668	0.0125155
																				Arid2	0.271154	1.78582e-10																		Nmd3	0.254581	0.0125254
																				Il20rb	0.264307	1.83487e-10																		Sec61a2	0.250114	0.0127038
																				Zyg11b	0.294755	2.25601e-10																		Arhgef3	0.285384	0.0128549
																				Usp31	0.283333	2.27832e-10																		Tox4	0.283916	0.0130589
																				Slc25a28	0.308595	2.36441e-10																		Prpf18	0.254367	0.0180486
																				Metap2	0.294969	2.5578e-10																		Baz2a	0.292599	0.0189925
																				Snhg12	0.285123	2.75164e-10																		Mpp5	0.297688	0.0194889
																				Arhgap35	0.33403	3.02196e-10																		Smu1	0.262383	0.0208646
																				Adnp	0.301719	3.09824e-10																		Taf3	0.270843	0.0209091
																				Ndel1	0.297445	3.10705e-10																		Ube2n	0.253202	0.0212145
																				Ccar1	0.304381	3.37981e-10																		Fosb	0.594418	0.0213395
																				Zbtb43	0.251183	3.88112e-10																		Phf21a	0.268377	0.0218377
																				Usp16	0.331532	3.97864e-10																		Mex3c	0.305745	0.0248366
																				Uri1	0.305534	4.19114e-10																		Zdhhc20	0.299077	0.0254071
																				Tasor2	0.290272	4.29405e-10																		Tut4	0.294841	0.0255562
																				Tnrc6a	0.344314	4.30647e-10																		Bsdc1	0.310335	0.027589
																				Cspp1	0.279054	4.55953e-10																		Sp3	0.252222	0.0278356
																				Lgr4	0.354587	4.93581e-10																		Lmo7	0.345637	0.0280704
																				Lrp5	0.269481	5.28093e-10																		Kat2b	0.301742	0.0283932
																				Fam13b	0.318887	5.78078e-10																		Phc3	0.297042	0.0290523
																				Crtc3	0.397108	5.80471e-10																		Rheb	0.272337	0.029436
																				Stox2	0.279488	6.00534e-10																		Acox1	0.275261	0.0302724
																				Serinc5	0.251713	6.29897e-10																		Rock1	0.25533	0.0308442
																				Phc3	0.265528	6.32789e-10																		Esco1	0.254704	0.0324068
																				Zzz3	0.362979	6.77037e-10																		Asxl2	0.269015	0.0351719
																				Nub1	0.259539	8.16367e-10																		Rnf10	0.292663	0.0360316
																				Itpr2	0.333225	8.29043e-10																		Stx3	0.301468	0.0360949
																				Ythdf2	0.302138	8.48221e-10																		Slbp	0.261003	0.0372097
																				Tpp2	0.336162	9.08787e-10																		Coro1c	0.261103	0.0426272
																				Kpna3	0.293672	1.05536e-09																		Ppp4r1	0.274803	0.0433589
																				Dcaf5	0.323781	1.12596e-09																		Tsen34	0.258704	0.0527008
																				Fam117b	0.357486	1.26866e-09																		Tasor2	0.263123	0.0535319
																				Baz1b	0.300968	1.36663e-09																		Sacm1l	0.26546	0.0753886
																				Slc12a2	0.268168	1.42923e-09																		Zyg11b	0.271727	0.0760174
																				Notch1	0.2869	1.49408e-09																		Rngtt	0.283819	0.0780389
																				Rab28	0.329291	1.67992e-09																		Pmepa1	0.322159	0.0810529
																				Efr3a	0.297446	1.69329e-09																		Pias1	0.280949	0.0935788
																				Pacs1	0.47643	1.71507e-09																		Ppfia1	0.278826	0.0950671
																				Sbno1	0.283493	1.89363e-09																		Rabgap1	0.260684	0.109171
																				Fam193a	0.329414	1.89783e-09																		Stam	0.270521	0.165422
																				Vmp1	0.367127	1.98042e-09																		Skint3	0.670976	0.16984
																				Trim24	0.302661	1.98951e-09																		Usp22	0.285654	0.171605
																				Pxdc1	0.330054	2.3515e-09																		Ttc37	0.278854	0.179644
																				Eps15	0.466497	2.44804e-09																		Hivep3	0.336783	0.247062
																				Iws1	0.261292	2.45202e-09																		Stim2	0.292052	0.253111
																				Dcun1d5	0.302077	2.57505e-09																		Phlda1	0.354828	0.301145
																				Myh9	0.26821	3.19832e-09																		Hmgb2	0.32895	0.312414
																				Zfp385a	0.276246	3.24401e-09																		Dctn4	0.273653	0.387814
																				Tbc1d1	0.417687	3.29207e-09																		Rnf24	0.261562	0.398538
																				Spin1	0.282915	3.29802e-09																		Irs2	0.267331	0.453554
																				Cops2	0.290385	3.5551e-09																		Relch	0.279525	0.466951
																				Frmd6	0.255682	3.69468e-09																		Brwd3	0.262167	0.525087
																				Nmd3	0.277636	3.75074e-09																		2410006H16Rik	0.277619	0.543806
																				1810026B05Rik	0.261413	4.69294e-09																		Pi4k2a	0.250506	0.651678
																				Srek1	0.343686	4.89558e-09																		Clip1	0.262957	0.659931
																				Smad2	0.273805	5.24686e-09																		Arnt	0.288	0.804724
																				Ccdc71l	0.365168	5.254e-09																		Kat6b	0.280656	0.854713
																				1810013L24Rik	0.334326	5.74688e-09																		Ncapg2	0.285412	0.886194
																				Kdm1a	0.251076	5.81915e-09																		Rnf121	0.266066	0.960267
																				Zfp91	0.295882	5.97547e-09																		Pcna	0.257249	0.960666
																				Extl3	0.26786	6.0452e-09																		Yaf2	0.250073	0.967892
																				Rsrc2	0.282554	6.12494e-09																		R3hcc1l	0.264466	0.969123
																				Foxo1	0.294757	6.5968e-09																		Zswim6	0.332672	1
																				Tbc1d15	0.275177	7.41365e-09																		Dnaja1	0.355259	1
																				Trerf1	0.319666	8.04887e-09																		Atg4b	0.256661	1
																				Hivep2	0.26648	8.7109e-09																		Cdc42bpb	0.259913	1
																				Xpo4	0.274859	8.93739e-09																		H2-Q7	0.267754	1
																				Pxk	0.300703	9.55898e-09																		Btbd10	0.283962	1
																				Cog3	0.254092	1.02748e-08																		Armh3	0.25889	1
																				Wdr70	0.252348	1.035e-08																		Tasor	0.279016	1
																				Cdk7	0.283741	1.06815e-08																		Ier2	0.29311	1
																				Spast	0.270719	1.1286e-08																		Dlst	0.281563	1
																				Dicer1	0.253851	1.17992e-08																		Fbxl20	0.286727	1
																				Srsf7	0.305252	1.23852e-08																		Dlgap4	0.263919	1
																				Atf3	0.297466	1.30214e-08																		B4galt1	0.280659	1
																				Arih2	0.270355	1.39516e-08																		Fbxo34	0.300675	1
																				Pprc1	0.268469	1.44283e-08																		Plekhg3	0.267311	1
																				Slc4a7	0.596744	1.84105e-08																		Snx7	0.251465	1
																				Zc3h15	0.306666	1.98097e-08																		Plk2	0.28899	1
																				Fosb	0.351957	2.07314e-08																		Samd4	0.291725	1
																				Phldb2	0.504355	2.1844e-08																		Id3	0.359808	1
																				Flvcr1	0.321044	2.74583e-08																		Gm20186	0.250126	1
																				Igfbp3	0.402027	2.97754e-08																		Gpcpd1	0.363003	1
																				Slc7a1	0.258488	3.01215e-08
																				Kansl3	0.27671	3.1353e-08
																				Ppp4r3b	0.257941	3.18194e-08
																				Psmb2	0.286807	3.28992e-08
																				Prkcd	0.268837	3.37917e-08
																				Kif13a	0.418557	3.42652e-08
																				Srsf1	0.25134	3.43926e-08
																				Trio	0.288665	4.20831e-08
																				Gabpb1	0.272454	4.38167e-08
																				Akap10	0.258069	4.6468e-08
																				Atp2c1	0.291676	4.66812e-08
																				Lcorl	0.392591	4.95358e-08
																				Wipf2	0.252189	4.98024e-08
																				Gcnt2	0.365115	5.05788e-08
																				Ube2j2	0.276699	5.07544e-08
																				Ddr2	0.436597	5.37478e-08
																				Srrm1	0.27013	5.44128e-08
																				Hadhb	0.25756	7.61561e-08
																				Nsmce2	0.29378	7.76204e-08
																				Wwox	0.328192	8.22972e-08
																				Vta1	0.27009	8.46018e-08
																				Dmtf1	0.290559	9.99612e-08
																				Phf20l1	0.264254	1.03319e-07
																				Jun	0.251932	1.1931e-07
																				Ddx21	0.272899	1.24992e-07
																				Api5	0.307536	1.42551e-07
																				Mat2a	0.298997	1.42658e-07
																				Smc4	0.311002	1.62722e-07
																				Paip1	0.256776	1.69416e-07
																				Jak1	0.288197	1.94546e-07
																				Gtf3c2	0.255954	1.97062e-07
																				Nrf1	0.321981	2.33123e-07
																				Dennd1b	0.312386	2.73361e-07
																				Gtf3c1	0.269059	2.95548e-07
																				Bbx	0.350401	3.36809e-07
																				Ube3c	0.292376	3.46486e-07
																				Bcar3	0.319474	3.56284e-07
																				Rnf24	0.302402	3.60588e-07
																				Sipa1l3	0.323709	3.85684e-07
																				Il15ra	0.252532	3.94874e-07
																				Sf3b6	0.272845	3.99761e-07
																				Fam49b	0.517237	4.38001e-07
																				Btbd1	0.301225	4.60659e-07
																				Cbfb	0.342664	5.34641e-07
																				Uso1	0.295899	5.39911e-07
																				Pdhb	0.257581	5.45761e-07
																				Pkib	0.347307	6.1564e-07
																				Afg3l2	0.254042	6.25193e-07
																				R3hcc1l	0.264817	7.38874e-07
																				Atg5	0.282581	7.79679e-07
																				Spred2	0.436784	1.04017e-06
																				Smad4	0.261452	1.16888e-06
																				Arl13b	0.267459	1.53715e-06
																				Hat1	0.259337	1.55854e-06
																				Chka	0.278691	1.61691e-06
																				Cbfa2t2	0.253424	1.86551e-06
																				Desi1	0.334805	2.07532e-06
																				Atf2	0.325576	2.33972e-06
																				Dnajc1	0.30061	2.42715e-06
																				Map3k2	0.326577	2.56051e-06
																				Papss1	0.251075	3.77775e-06
																				Rb1	0.274535	3.85016e-06
																				Pcmt1	0.275659	3.9559e-06
																				Ss18	0.298288	4.40166e-06
																				Abhd5	0.270512	4.62334e-06
																				Rnf2	0.264427	4.71848e-06
																				Ccny	0.264959	5.39205e-06
																				Acox1	0.257966	7.76068e-06
																				Srgap2	0.262989	8.33021e-06
																				Ngf	0.268503	8.64793e-06
																				Pmepa1	0.253894	9.40774e-06
																				Gnb1	0.25684	1.1091e-05
																				Actr2	0.273818	1.43696e-05
																				Slc49a4	0.298199	1.49465e-05
																				Atxn2l	0.253435	1.71014e-05
																				Mtus1	0.341628	2.19645e-05
																				Hs2st1	0.309572	2.20679e-05
																				Asxl1	0.288424	2.541e-05
																				Vti1a	0.250454	3.28452e-05
																				Rap1gds1	0.291734	4.05814e-05
																				Zzef1	0.338857	4.35238e-05
																				Prkce	0.268856	6.08528e-05
																				Ankib1	0.250715	6.60158e-05
																				Galnt1	0.268524	9.02449e-05
																				Htra1	0.291759	9.05046e-05
																				Tut4	0.293123	9.73381e-05
																				Ube2e3	0.288932	0.000113315
																				Trpm7	0.295263	0.000154815
																				Smad3	0.259264	0.000155743
																				Dlgap4	0.281345	0.000261061
																				Pou2f1	0.318913	0.00078549
																				Atp11c	0.337066	0.00188134
																				Fbxl20	0.258085	0.0023733
																				Fam133b	0.284034	0.00262066
																				Ndufs4	0.257508	0.00272689
																				Ano6	0.279475	0.00480927
																				Fam168a	0.308114	0.00683041
																				Top2a	0.306455	0.0100971
																				Palld	0.261009	0.0206698
																				Fxr1	0.277491	0.0267655

## Sheet: IMMUNE
Supplementary file 4b: Differential expression table of genes for infected immune cells
Related to Figure 1C
Wilcoxon rank sum test in the infected dataset
M2-LIKE				TRM				DC/LC				TMEM				NEUT1				NEUT2
Gene	avg_log2FC	p_val_adj		Gene	avg_log2FC	p_val_adj		Gene	avg_log2FC	p_val_adj		Gene	avg_log2FC	p_val_adj		Gene	avg_log2FC	p_val_adj		Gene	avg_log2FC	p_val_adj
Pid1	3.33245	0		C1qc	2.50349	0		Ccr7	3.34496	0		Grap2	3.65904	0		S100a9	4.74248	0		Mirt1	2.64689	3.04068e-140
Arg1	3.07783	0		Ccr5	2.34499	0		Ramp3	2.8772	0		Cd247	3.55125	0		S100a8	4.56339	0		Csf3r	2.67867	5.90092e-87
Pf4	2.82579	0		Ms4a7	2.27827	0		Zfp366	2.51211	0		Skap1	3.52588	0		Stfa2l1	3.93903	0		Sgms2	2.63776	7.10805e-82
Cxcl3	2.74748	0		Pltp	2.02327	0		Gpr183	2.51008	0		Itk	3.30164	0		Srgn	3.89269	0		Ankrd33b	2.51984	2.74524e-71
Cacna1d	2.6629	0		Laptm5	1.97213	0		Htr7	2.18024	0		Cd3g	2.93098	0		Retnlg	3.81682	0		Xylt1	2.73605	1.31946e-67
F13a1	2.63173	0		Aif1	1.86027	0		Myo1g	2.15488	0		Sytl3	2.78691	0		Hdc	3.796	0		Sorl1	2.18154	1.00301e-60
Lyz2	2.57595	0		Csf1r	1.84305	0		P2ry10	2.11014	0		Il2rb	2.77502	0		Slpi	3.5583	0		Pik3ap1	2.67102	2.78058e-60
Cybb	2.51373	0		Ms4a6c	1.79669	0		Flt3	1.98207	0		Trat1	2.44769	0		Acod1	3.44526	0		Gm20528	2.76876	3.0794e-59
Ctss	2.50913	0		Cd83	1.72732	0		Klrd1	1.92652	0		Cd3e	2.08884	0		Csf3r	3.355	0		Alcam	2.50772	1.08216e-57
Hmox1	2.46028	0		Cd68	1.70149	0		Grk3	1.7378	0		Card11	1.75165	0		G0s2	3.30554	0		Neat1	1.46783	1.4818e-48
Abca1	2.40535	0		Nceh1	1.64677	0		Pdcd1lg2	1.6671	0		Cd2	1.75009	0		Entpd1	3.21005	0		Lilrb4a	1.94741	1.70753e-46
Ccl9	2.39097	0		Ms4a6d	1.6396	0		Klrb1b	1.65675	0		Cxcr6	1.66494	0		Sgms2	3.17009	0		Apbb1ip	2.29977	2.88573e-45
Pdpn	2.31163	0		C3ar1	1.49369	0		Klrk1	1.39734	0		Cd3d	1.61125	0		Igf1r	3.16162	0		Rps6ka2	2.49639	3.02691e-45
Fn1	2.31146	0		Slamf7	1.45023	0		Gpr171	1.37561	0		Nkg7	1.58888	0		Pik3ap1	3.1229	0		Lilr4b	1.94739	3.63199e-44
Gramd1b	2.25863	0		Ccr2	1.42546	0		Ciita	1.2609	0		Sh2d2a	1.50672	0		Antxr2	3.06929	0		Fgr	2.24403	7.98283e-44
Zeb2	2.25081	0		Cd300c2	1.41546	0		Klri1	1.25123	0		Itgae	1.49762	0		Gsr	3.03162	0		Antxr2	2.23739	4.04106e-43
Lrmda	2.22367	0		Unc93b1	1.41375	0		Siglecg	1.14247	0		Clnk	1.3897	0		Mirt1	3.00763	0		Irak2	2.10517	7.31527e-43
Slc7a8	2.15424	0		Ms4a6b	1.34275	0		H2-DMb2	1.11305	0		Klrc1	1.38167	0		Nedd9	2.99002	0		Ptprc	2.09902	4.81172e-42
Ctsl	2.14393	0		Ptpn18	1.29967	0		Strip2	1.10566	0		Lck	1.35839	0		Lcn2	2.96337	0		Fgd3	1.95301	1.31734e-41
Thbs1	2.09074	0		Adap2	1.1781	0		Il21r	1.01988	0		Trdv4	1.23237	0		Sorl1	2.94043	0		Sh2d3c	2.0168	1.15199e-40
Trim25	2.05845	0		Clec4a3	1.15745	0		Gm7247	0.957894	0		Tcrg-C1	1.17561	0		Mxd1	2.91178	0		Igf1r	2.73711	1.22197e-40
Cxcl2	2.03171	0		Ms4a4c	1.13515	0		Gpr55	0.811541	0		Zap70	0.949759	0		Ankrd33b	2.81231	0		Entpd1	1.98582	3.41719e-39
Cd36	2.02643	0		Epsti1	1.1328	0		H2-Oa	0.588867	0		Ptprcap	0.932838	0		Sell	2.79779	0		Hdc	1.72189	3.97869e-39
Mitf	1.9997	0		Clec4a1	1.11908	0		Gm20513	0.416716	0		Tox	3.90653	3.89141e-299		Xylt1	2.76044	0		Lyst	2.5323	4.29999e-39
Rbm47	1.99375	0		Pld4	1.09629	0		Itgax	0.690575	3.92693e-298		Icos	2.75183	7.05913e-266		Il1r2	2.72474	0		Arg2	2.06016	7.14627e-38
Psap	1.99347	0		Fcgr1	1.08964	0		Ccl22	2.40215	4.58022e-293		Ctsw	0.887388	3.93367e-261		Lyst	2.69605	0		Dock2	2.06543	7.27256e-38
Abr	1.98755	0		Ly86	1.08682	0		Stat4	3.00995	3.25756e-279		Camk4	4.61955	5.27498e-256		Ccr1	2.6949	0		Mir142hg	2.03134	1.02964e-37
Trps1	1.93264	0		Fcrls	1.00028	0		H2-DMb1	1.65977	1.73174e-253		Pdcd1	1.32284	2.43711e-245		Arg2	2.67292	0		Gsr	2.09909	1.56757e-37
Zdhhc14	1.88527	0		Clec4a2	0.978662	0		Dnah2	0.796503	5.80657e-250		Jakmip1	0.713256	2.43116e-239		Tyrobp	2.65277	0		Sell	1.7091	2.11908e-37
Slc16a10	1.83639	0		Runx3	0.970978	0		H2-Eb1	4.75557	3.5747e-247		P2ry10	2.46381	1.5124e-236		Dgat1	2.64967	0		Nedd9	2.46406	3.45065e-37
Fnip2	1.80985	0		Plxnc1	0.87072	0		Cytip	3.22799	5.58186e-246		Ikzf3	1.94472	5.0344e-235		Fgr	2.6187	0		Malat1	1.00102	4.77424e-37
Dock10	1.77681	0		Spic	0.744705	0		H2-DMa	1.7523	2.52934e-241		Cd96	0.879526	2.45112e-234		Lilrb4a	2.60506	0		Gm26740	1.96406	5.11714e-34
Dab2	1.76077	0		Gpr65	0.597754	0		Tbc1d4	3.26249	2.47166e-239		Tespa1	0.835242	8.73777e-214		Stx11	2.59361	0		Il1rap	2.26048	2.04615e-33
Sash1	1.74973	0		Fcgr2b	1.54568	2.37729e-294		Mmp25	1.12964	1.1094e-237		Txk	1.81275	5.34003e-202		Samsn1	2.58061	0		4732465J04Rik	1.60669	1.99398e-32
Mdfic	1.73668	0		Ccl12	1.1922	7.63551e-294		Cd83	3.18121	7.52818e-227		Rundc3b	2.18049	7.87993e-186		Clec4e	2.57274	0		Gab2	1.75821	2.05059e-32
Id2	1.72669	0		Lst1	1.46478	3.67993e-293		Runx3	1.36806	1.16294e-223		Gm2682	2.81513	1.05584e-176		Sh2d3c	2.56788	0		Slc7a11	1.61561	4.5097e-32
Cd86	1.71065	0		Apobec1	1.62434	3.53892e-288		H2-Aa	4.80553	1.43504e-215		Ppp1r16b	2.47584	1.23531e-172		Clec4d	2.55424	0		Ripor2	1.69598	9.17163e-32
Tnfrsf1b	1.68871	0		Nxpe5	0.583305	4.44489e-288		Dapp1	2.23395	3.17404e-200		Trbc1	1.88644	2.99012e-167		Slc7a11	2.54181	0		Baz2b	1.72621	1.73661e-31
Msr1	1.68475	0		Trem2	1.33331	1.86086e-286		H2-Ab1	4.75003	9.62017e-196		Klrk1	1.37431	1.57568e-160		Slfn4	2.53627	0		Lyn	1.78896	4.36411e-31
Fmn1	1.66987	0		Cd86	1.99095	1.7284e-282		Gm17276	1.58222	1.46956e-191		Cd7	1.77791	1.77905e-154		Il1rap	2.51798	0		Samsn1	1.90209	5.05272e-31
Vav3	1.66851	0		Clec12a	0.46283	6.82065e-282		Rogdi	0.776799	2.20984e-190		Sidt1	1.31677	4.53971e-149		Trem1	2.50537	0		Camk1d	0.972099	1.82843e-30
Plin2	1.66624	0		Mrc1	2.45051	4.69868e-279		Cd74	4.8853	8.8384e-187		Tbc1d10c	0.633382	4.37953e-147		Lilr4b	2.50262	0		Gm42418	0.579001	2.52785e-30
Ftl1	1.66496	0		Gpr137b	1.41016	3.23789e-273		Rtn1	0.865433	1.55516e-185		Ptpn22	3.32947	7.39363e-138		Rps6ka2	2.50118	0		E230032D23Rik	1.61646	6.88925e-29
Fmnl2	1.65399	0		C1qb	2.81649	3.50019e-271		Rnf157	1.91661	1.42407e-183		Rhoh	1.24111	2.25853e-135		Resf1	2.49816	0		Retreg1	1.95377	8.6476e-29
Hilpda	1.61734	0		Rgs10	1.04425	2.13588e-270		Alpk2	0.574563	2.29578e-180		Traf3ip3	0.687308	2.28765e-130		Fcer1g	2.47544	0		Il18rap	1.58978	1.32577e-28
Arhgap10	1.6023	0		H2-DMa	0.806531	3.76594e-269		Serpinb6b	1.49571	1.27858e-178		Serpinb6b	1.32669	1.7334e-121		Cxcr2	2.45701	0		Bcl2l11	2.02028	5.73624e-28
Mpeg1	1.6015	0		Gpr132	1.14136	5.22453e-269		Zbtb46	1.6307	4.22074e-178		Avil	1.28807	1.78151e-116		Plek	2.43841	0		Chst11	1.90277	8.25973e-28
Ctsb	1.59734	0		Fermt3	0.921286	1.38626e-268		Bcl2a1d	1.78596	1.51705e-175		Il18r1	2.37212	4.35435e-115		Bcl2l11	2.43039	0		Zfp608	1.91527	3.08817e-27
Il1a	1.57657	0		Adgre1	1.36638	2.48281e-267		Cd72	0.730751	2.47571e-175		Cntn1	1.48131	4.71613e-105		Ptprc	2.39818	0		Myo1f	2.16744	7.18263e-27
Cd93	1.57445	0		Ifi207	1.28119	1.1399e-266		Napsa	1.2637	4.04664e-174		Rnf157	3.49213	2.25428e-102		Cd53	2.39654	0		Klra2	1.811	2.02926e-26
Mcl1	1.57246	0		Lpxn	0.946559	4.76434e-266		Grasp	1.88399	9.55234e-165		Gm36756	1.00238	2.73345e-94		Lmnb1	2.38188	0		Syk	1.57152	5.42223e-26
Fam20c	1.56737	0		Cd72	0.500653	8.75323e-266		Il4i1	1.40473	6.91914e-164		Sytl2	1.3996	5.13491e-94		Msra	2.37695	0		Srgn	1.0605	4.41223e-25
Fcgr2b	1.56457	0		Spi1	1.29077	7.14676e-262		Gpr132	2.14039	1.5363e-160		Gpr171	0.653739	9.69579e-93		Il1b	2.3649	0		Iqsec1	2.01027	9.62904e-25
Pik3r5	1.56362	0		Itga9	1.94612	9.3047e-258		Map3k14	2.84925	2.14115e-160		Zmat4	2.18241	4.67126e-91		Rdh12	2.35828	0		Cmip	1.52728	2.49473e-23
Cd38	1.55926	0		Ctss	2.02813	1.34906e-257		Rhof	1.1116	1.69456e-158		Pced1b	1.60539	5.96185e-85		Cd14	2.34625	0		Cd300lf	1.54434	1.4313e-22
Osbpl8	1.5588	0		Lgmn	2.4943	1.53817e-256		C130026I21Rik	0.987627	6.14562e-152		Trpm6	1.24635	9.65317e-82		Hcar2	2.30305	0		Gsap	1.91554	4.82205e-22
Rai14	1.54457	0		Aph1c	0.749219	1.79821e-255		Cd86	2.64847	7.40373e-151		Ripor2	2.74919	3.92702e-79		Mir142hg	2.29119	0		Mxd1	1.71325	1.03792e-21
Lgmn	1.54456	0		Pirb	1.03856	1.58843e-252		Sema7a	1.25508	2.96257e-150		Klrb1b	1.49726	7.69118e-74		Lyn	2.25764	0		Sema4d	1.87528	1.48803e-21
Lhfpl2	1.53566	0		Cxcr4	1.1767	6.18729e-251		Cd40	1.29201	1.32539e-147		Stat4	2.9471	4.622e-71		Gm26740	2.22153	0		Osbpl9	1.66972	1.90302e-21
Laptm5	1.51499	0		Mdfic	1.7575	1.28753e-248		Cbfa2t3	1.21671	8.30359e-146		Acap1	0.751367	5.47939e-71		Tnfrsf23	2.22136	0		Fmnl1	1.48547	2.30061e-21
Jarid2	1.50706	0		Havcr2	1.12112	1.82512e-248		Rnf180	1.20862	9.6306e-146		Insyn2b	1.61231	1.19108e-69		Cd52	2.21229	0		Diaph1	1.44544	3.67481e-21
Btg1	1.50379	0		Tbc1d9	1.34269	3.97542e-247		Prr5l	1.35345	3.63867e-141		Ctse	0.955853	5.82981e-69		Pag1	2.19195	0		Mbnl2	1.57763	5.68885e-21
Pla2g7	1.50145	0		Slc38a1	1.21252	7.50706e-247		Havcr2	1.82333	2.06458e-139		Klrd1	0.891596	1.37392e-64		Txnip	2.18619	0		Slfn4	1.79686	2.208e-20
Plekhm3	1.4992	0		Rbm47	1.808	7.12565e-246		Zbtb18	1.47422	2.2659e-135		Sept6	1.60428	2.67681e-64		Tpd52	2.17989	0		Spag9	1.17673	3.07297e-20
Rbpj	1.49767	0		Rab7b	1.34468	1.28166e-244		Kit	0.92401	9.79221e-131		Tcf7	1.04692	1.94299e-63		Fth1	2.17236	0		Elmo1	1.84726	3.65956e-20
Rgl1	1.48059	0		2310022A10Rik	0.8302	6.74709e-243		Edil3	1.66258	2.26187e-130		Ikzf1	1.9254	5.60249e-63		Il15	2.164	0		Ccr1	1.48124	5.854e-20
Dennd1a	1.47695	0		Mpeg1	1.51734	1.66243e-242		Tspan13	1.50292	8.86716e-129		Akna	1.15564	8.54661e-63		Nlrp3	2.16331	0		Gfod1	2.09094	6.65531e-20
Cebpb	1.46035	0		Slc37a2	0.909501	2.00537e-241		Ctnnd2	1.06027	8.3244e-127		Rinl	1.11085	2.27289e-62		Irak2	2.15762	0		Stx11	1.65403	2.06026e-18
Csf1r	1.45649	0		Cfp	1.25846	6.88447e-241		Traf1	2.7295	2.46682e-126		Runx3	2.28834	4.2569e-62		Apbb1ip	2.15668	0		Cd44	1.15778	3.84219e-18
Ms4a6d	1.45153	0		Arrb2	0.703413	2.2743e-239		Mrtfa	2.5483	1.76594e-123		Cyfip2	1.68618	3.13598e-61		Lcp1	2.14899	0		Morrbid	2.07312	4.41303e-18
Eepd1	1.44241	0		Cd180	0.6123	1.80243e-237		Fyn	2.48649	5.93456e-123		Il12rb2	2.85818	2.83531e-58		Klra2	2.14888	0		F5	1.57024	5.95619e-18
Pstpip2	1.42888	0		Cd48	0.597309	2.24447e-235		Plxnc1	1.50822	2.89813e-121		Il2ra	2.49152	8.27101e-56		4732465J04Rik	2.12539	0		Babam2	1.93164	6.98717e-18
Tbc1d9	1.42214	0		Pik3r5	1.4967	2.01149e-232		Cenpa	1.51434	1.13095e-116		Rcsd1	1.37867	3.17771e-51		Mirt2	2.09502	0		Atg7	2.14538	9.35975e-18
Fth1	1.416	0		Ifi30	1.5589	1.982e-230		Arhgap45	1.08967	9.18915e-116		Plekha2	1.756	2.79899e-50		Cd300lf	2.08164	0		Btbd9	1.76841	1.02848e-17
Grn	1.41543	0		Prex1	1.07346	1.33027e-229		Ms4a4c	0.775243	5.51017e-115		Kdm2b	2.93431	4.67837e-48		Sp140	2.06678	0		S100a9	0.709912	2.10827e-17
Alox5ap	1.4139	0		Stap1	1.22561	1.56832e-229		Cmtr1	1.92883	6.22983e-113		Ccdc88c	2.06667	6.96735e-48		Grina	2.02397	0		Suco	1.47901	2.48998e-17
Atp2b1	1.41149	0		Cytip	1.61223	2.29195e-229		Plscr1	1.23133	4.43982e-110		St6galnac3	3.35343	2.54322e-46		Slc11a1	2.02127	0		AY036118	0.861649	2.84173e-17
Gab2	1.40224	0		Tmem106a	0.871366	2.8616e-229		Phlpp1	3.08202	1.25215e-109		Rhof	1.2673	1.40909e-45		Ncf2	2.01597	0		Itgam	1.67314	6.86593e-17
Map4k4	1.39734	0		Nrros	1.05517	4.46081e-229		Gpr137b	1.44571	7.07187e-107		Pik3cd	1.58112	2.49136e-45		Mcemp1	2.01212	0		Smox	1.29521	1.60464e-16
Cd14	1.39676	0		Cyba	1.6311	6.38334e-229		Lrrk1	1.85578	7.57815e-107		Itgal	1.09449	1.06996e-44		Wfdc21	1.98796	0		Lcp2	1.6813	2.45446e-16
Npc2	1.3946	0		Arl4c	1.47653	1.08997e-228		Syngr2	1.93835	5.15155e-106		Dock8	2.38753	2.539e-43		Zfp608	1.98234	0		Gm43661	1.63783	7.6812e-16
Tns3	1.38208	0		Ifi27l2a	2.05307	6.14485e-228		Il1r2	2.5024	7.74331e-104		AU020206	2.29874	3.96526e-42		Slc2a3	1.97843	0		Hectd1	1.5522	1.21633e-15
Ninj1	1.38199	0		Il21r	0.340426	8.43102e-227		Etv3	1.91932	1.761e-103		Trdc	2.3715	5.34359e-42		Fpr1	1.93982	0		Cd33	1.48799	2.91991e-15
Aoah	1.37536	0		Fcer1g	1.57892	6.0019e-225		Cd80	1.83501	3.47973e-100		Abcb1a	1.57573	1.3538e-41		Iqsec1	1.92756	0		Msra	2.17404	3.15048e-15
Fyb	1.37346	0		C1qa	2.88254	6.83972e-224		Fam129a	1.52177	9.69294e-100		Tnfrsf9	2.38463	6.44934e-41		Cd33	1.92692	0		Fndc3b	1.26094	1.21346e-14
Itgam	1.36564	0		Snx24	1.6729	2.85599e-223		Fam49a	1.32452	2.60145e-98		Gcnt1	1.44847	1.03958e-39		Smox	1.91543	0		Ncf2	1.35164	3.83432e-14
Sestd1	1.3628	0		Tns3	1.51186	1.35999e-220		Rgs1	1.99925	7.61444e-98		Sept1	0.87834	1.15928e-39		Baz2b	1.90397	0		Inpp5d	1.54544	4.25873e-14
Kcnk13	1.35442	0		Pla2g7	1.49666	2.81967e-218		Lsp1	1.88699	1.51775e-97		Myo1g	1.15175	1.33327e-38		Emilin2	1.89379	0		Acod1	1.56202	4.86726e-14
Clec4d	1.34639	0		Renbp	0.709976	6.71049e-218		Nr4a3	2.71367	3.44449e-96		Cytip	1.78645	4.15249e-37		Cd300a	1.88932	0		Anxa11	1.60957	5.70589e-14
Vegfa	1.34571	0		Sestd1	1.43541	3.37654e-217		Pde3b	1.61569	8.44972e-96		Lpxn	1.68542	1.293e-36		Myo1f	1.88745	0		Sik3	1.37014	7.55206e-14
Mrc1	1.34542	0		Ctsc	1.69994	4.03608e-217		Gm26510	0.611928	3.07527e-94		Pde3b	2.40708	1.91773e-36		Snx20	1.88573	0		Cd300a	1.50196	1.1203e-13
Fndc3a	1.34489	0		Sdc3	1.08454	3.54318e-216		Gpr68	0.827256	9.9754e-94		Ltb	1.12153	2.67447e-35		Sirpb1b	1.87372	0		Optn	1.54422	1.15841e-13
C3ar1	1.34453	0		Prkcb	0.815651	1.73131e-215		Ikbkb	1.46878	1.16913e-92		Zeb1	3.23019	6.12753e-35		Gm43661	1.87196	0		Il15	1.93166	1.2133e-13
Junos	1.33832	0		Lyz2	2.02371	1.34427e-214		Stap1	1.55511	1.42246e-92		Rgs1	2.98901	1.04757e-34		Sh2b2	1.8651	0		Slc16a6	1.43341	4.41638e-13
Sirpa	1.32806	0		Otulinl	0.72116	4.09973e-214		Il7r	2.10104	2.10943e-92		Vgll4	2.53854	2.75465e-34		Slc40a1	1.85943	0		Notch2	1.56727	4.68166e-13
Slfn2	1.3203	0		Snx8	1.01221	5.6201e-214		Csf2rb	1.97912	2.42317e-91		Tut4	2.22631	3.60953e-33		Retreg1	1.85566	0		Kras	1.59419	6.08539e-13
Clec4n	1.31265	0		Rassf2	0.721319	1.37306e-212		Selplg	1.49446	2.79605e-91		Rnf125	1.46964	4.62562e-33		C5ar1	1.84886	0		Gm31718	1.34932	6.09721e-13
Zmiz1	1.30091	0		Gm6377	0.506066	2.08777e-212		Clec10a	0.922045	6.37572e-91		Osbpl3	2.1185	5.75275e-33		Trim30b	1.83799	0		Rnf149	1.31131	6.82617e-13
Syk	1.29765	0		H2-DMb1	0.84966	4.44961e-212		Ifitm1	3.75198	1.54256e-90		Dennd4a	3.34772	6.13241e-33		Syk	1.83493	0		Resf1	1.7968	7.75457e-13
Sh3kbp1	1.29565	0		Fyb	1.21457	4.78405e-212		Samsn1	2.06745	1.41269e-89		Runx2	2.17744	2.20689e-32		Slfn1	1.83285	0		Tnfrsf23	1.87568	9.33954e-13
Lrrc8d	1.27814	0		Gm46224	0.800429	8.61396e-212		Ly75	1.56004	2.04557e-89		Ramp3	1.50519	1.20843e-31		Slc15a3	1.82686	0		Cd53	1.10955	1.6701e-12
Mdm2	1.27076	0		Cd300ld	0.833816	2.01064e-211		Snhg15	0.89665	1.04639e-87		Crem	2.28297	1.55817e-31		Itgam	1.82269	0		Runx1	1.91083	1.84264e-12
Abcc1	1.26763	0		Folr2	1.02896	6.72388e-211		Snx20	0.994924	2.75298e-87		Dock10	2.22598	3.53438e-31		Fgd3	1.82223	0		Il1r2	1.27883	3.64899e-12
Clec4e	1.26349	0		Irf8	0.694635	2.27855e-210		Ifi30	1.98013	4.74809e-87		Arhgap45	1.32009	7.62823e-31		F5	1.82182	0		Plek	1.24526	3.70357e-12
Lcp1	1.26244	0		Evi2a	0.65156	5.40622e-210		Nuak2	0.942254	1.01407e-85		Arhgap15	3.45845	1.03987e-30		Hsd11b1	1.80738	0		Sirpb1b	1.19381	2.43397e-11
Tlr2	1.26045	0		Ftl1	1.7538	7.02677e-210		Lactb	1.08985	1.07677e-85		Ptprc	2.32765	1.24871e-30		Lcp2	1.80647	0		Pag1	2.03305	2.97936e-11
Adgre1	1.2573	0		Ctsz	1.45153	9.39025e-210		Plcl1	1.5532	6.17983e-85		Arhgap25	1.3258	1.64646e-30		Tnfrsf26	1.80477	0		Fbxl5	1.76804	3.28362e-11
Ppm1h	1.25728	0		Npc2	1.55396	1.87931e-209		AI662270	0.739578	3.34645e-84		Pde7a	2.28666	5.36417e-30		Rab44	1.77909	0		Ccnl1	1.32112	3.62575e-11
Gna13	1.25667	0		Got1	1.3842	5.08812e-209		Map3k1	1.65362	4.48607e-84		Satb1	3.08408	7.50534e-30		Fcgr3	1.76535	0		Kpna4	1.61693	5.92214e-11
Cfp	1.24971	0		Inpp5d	1.01935	6.78458e-208		Slc38a1	1.16998	3.03985e-82		Dock2	2.56314	3.07184e-29		S100a11	1.75735	0		Snx20	1.29449	5.99972e-11
Trem2	1.23913	0		Plekho1	0.754427	2.45836e-207		Rftn1	2.2147	3.71156e-82		Ets1	2.41554	8.29593e-29		Il18rap	1.75612	0		Zeb2	1.00859	8.86351e-11
Dock7	1.23852	0		Syk	1.41803	1.63478e-206		Nrros	1.33326	5.15035e-82		Ankrd44	2.12239	3.42856e-28		Fxyd5	1.74405	0		Slc11a1	1.40147	1.62206e-10
Il7r	1.23428	0		Ms4a4a	0.566295	2.56431e-206		Pik3r5	1.77104	1.07207e-81		Emb	2.9134	4.70301e-27		Selplg	1.73431	0		Tpd52	1.16834	1.83807e-10
Lpar1	1.23306	0		Hexa	1.31879	8.45424e-205		Itga4	1.8625	2.8068e-81		Prex1	1.72697	1.96913e-26		E230032D23Rik	1.7284	0		Clec4d	0.812895	2.14822e-10
Ampd3	1.21839	0		Ninj1	1.42551	1.53874e-204		Slc8a1	1.91332	4.38197e-80		Zbtb1	1.46687	6.70428e-26		Cd9	1.7143	0		Arhgap26	1.75164	1.81907e-09
Cd68	1.212	0		Fcgr4	0.69633	3.88354e-204		Dennd4a	2.26418	9.00276e-80		Abcb1b	2.61651	2.89564e-25		Dock2	1.71393	0		Gtdc1	1.83544	3.93457e-09
Nckap1l	1.2103	0		Trim25	1.65757	2.40262e-203		Foxn3	2.28178	1.14856e-79		Acot11	0.79486	3.05909e-25		A530064D06Rik	1.69237	0		Dleu2	1.44988	4.44711e-09
Rffl	1.21017	0		Efhd2	1.35438	5.91179e-203		Tnip3	1.95852	3.3509e-79		Fam129a	2.60817	4.11968e-25		Ripor2	1.68247	0		Chd7	1.33831	7.44157e-09
Adam8	1.20934	0		Dclre1c	1.28266	5.26706e-202		St8sia4	2.09364	5.32079e-79		Rab27a	0.907124	1.32571e-24		Fmnl1	1.63428	0		Vav3	1.24561	8.15911e-09
Ctsd	1.20665	0		Tm6sf1	0.887427	5.84908e-202		Aff3	2.20629	5.56866e-79		Mir142hg	1.77516	1.42844e-24		Themis2	1.61941	0		Bcl2l1	1.4249	8.44232e-09
Cflar	1.20127	0		Ucp2	1.38948	1.01301e-201		Malt1	2.5663	3.45313e-78		Vps37b	2.72887	1.55435e-24		Fpr2	1.60309	0		Cux1	1.43137	1.54927e-08
Plek	1.19658	0		Ifi209	0.670712	7.73859e-201		Zmynd15	0.868441	6.06192e-78		Gng2	1.71791	2.30666e-24		Gmfg	1.60258	0		Lcp1	1.0794	2.0482e-08
Ctsc	1.1909	0		Msr1	0.958463	1.6488e-200		Rel	2.06194	2.38779e-77		Fnbp1	2.5539	5.76868e-24		Neurl3	1.59234	0		Dop1b	1.71668	8.94261e-08
Ctsz	1.19064	0		Dab2	1.53678	1.69195e-200		Pkib	1.81436	4.67368e-77		Slc38a1	1.49224	7.60843e-24		4933432I03Rik	1.57365	0		Cd84	1.47174	1.3322e-07
Cyba	1.1904	0		Lipa	1.31492	9.29541e-200		Pip4k2a	1.56723	5.93444e-75		Mbnl1	1.90518	5.48192e-23		Litaf	1.56731	0		Amn1	1.46763	1.4098e-07
Hexa	1.19026	0		St6galnac4	0.654932	2.68319e-199		Psmb9	0.835033	2.67545e-74		Inpp5d	1.67493	7.29756e-23		Trem3	1.53132	0		Tlr4	1.49279	1.67543e-07
Cd84	1.17327	0		Il10ra	0.659864	2.81653e-197		Kif21b	0.574688	4.48483e-74		Arhgap30	0.993916	7.45396e-23		Tlr13	1.44232	0		Pnpla7	1.51032	2.30992e-07
Lamp1	1.1724	0		Rilpl2	1.07583	2.86859e-197		Coro1a	1.13024	8.3327e-74		Fryl	2.38755	8.41558e-23		Dhrs9	1.43493	0		A330023F24Rik	1.1979	2.56486e-07
Gas2l3	1.17152	0		Ppm1h	1.42088	1.81539e-194		Csf2rb2	1.05669	8.6917e-74		Neurl3	1.86887	1.1337e-22		Gpat3	1.42751	0		S100a8	0.6906	2.61319e-07
Gnaq	1.16664	0		Nckap1l	0.857084	3.67793e-194		Etv6	2.10337	6.44373e-73		Samsn1	1.37237	1.18694e-22		2310001H17Rik	1.38753	0		Rab7	1.06096	3.42473e-07
Sdcbp	1.15401	0		AB124611	0.48427	1.49246e-193		Rcsd1	1.1278	6.83431e-73		Fyn	2.23859	2.00068e-22		F630028O10Rik	1.37549	0		Litaf	1.16856	4.57462e-07
F10	1.15234	0		Cxcl16	1.71249	2.78807e-191		Cd52	1.72962	2.86759e-72		Tnrc6b	1.83112	2.0636e-22		Jaml	1.36194	0		Lrrc8d	1.35088	4.78338e-07
Creg1	1.14827	0		Psap	1.671	3.2632e-191		Arrb2	0.720925	3.90613e-72		Akap13	1.70985	2.09402e-22		Ptgs2os2	1.31114	0		Dennd4a	1.30914	4.85161e-07
Snx8	1.14313	0		Hfe	0.458306	3.91536e-191		Epsti1	1.11892	5.01405e-71		Gm16201	1.06507	2.68222e-22		9830107B12Rik	1.2218	0		Sh2b2	1.47961	4.88983e-07
Basp1	1.14022	0		Gm34084	0.735836	5.39375e-191		Basp1	1.86712	1.16288e-69		Stat5b	2.26095	2.75873e-22		4833407H14Rik	1.20625	0		Atf7ip	1.70125	6.52124e-07
Efhd2	1.13072	0		Myo1g	0.58281	1.22845e-187		Dusp2	0.677553	1.92847e-69		Gsdme	1.07362	6.86648e-22		A530013C23Rik	1.16881	0		Cd9	0.896328	8.21258e-07
Slc23a2	1.12486	0		Gm2a	0.985589	8.82358e-186		Grb2	1.54655	5.97932e-69		9930111J21Rik2	0.947115	8.02628e-22		Mrgpra2b	1.14549	0		Gpcpd1	1.40366	1.32691e-06
Apoc2	1.1236	0		Slc8a1	1.75464	4.16182e-184		Spi1	1.18856	4.49502e-67		Cenpa	1.3486	8.19556e-22		Pglyrp1	0.982272	0		Cyp4f18	1.55629	1.35376e-06
Itgb2	1.1169	0		Ncf2	0.741048	4.9315e-184		Ncoa7	1.6105	2.70997e-66		Gpr183	1.00526	1.11178e-21		Gm20406	0.950595	0		Nfe2l2	1.18448	5.16255e-06
Gas7	1.11194	0		B4galt5	1.3017	2.4578e-183		Pmaip1	1.33302	4.38287e-66		Kcnq5	2.62856	1.63571e-21		Dop1b	1.94574	2.90392e-303		Jmjd1c	1.11367	1.12851e-05
Card19	1.11075	0		Tlr5	0.354006	3.01391e-183		Map4k4	1.88997	1.05237e-65		Cd244a	0.710861	1.92498e-21		Rab7	1.80981	5.77304e-302		Trem1	1.00803	1.25477e-05
Ms4a7	1.10877	0		Gab2	1.49473	3.10999e-183		Dpp4	0.836482	4.36304e-65		Atp10a	2.40803	4.13521e-21		Gm16556	0.935213	9.72958e-301		Gda	1.63186	1.29774e-05
Cndp2	1.10846	0		Ptafr	1.0818	2.5653e-181		Auh	1.04789	1.56527e-64		Me2	1.08083	4.59265e-21		Ets2	1.65533	1.53557e-299		Tfeb	1.42839	2.04379e-05
Bst1	1.10408	0		Grn	1.66587	3.62263e-181		Irf8	1.65536	3.50306e-64		Ikzf2	3.12443	5.43962e-21		Osbpl9	1.92985	6.97401e-298		Skap2	1.49879	2.74657e-05
P2rx4	1.09476	0		Basp1	1.54102	4.95693e-181		Cd274	2.02378	4.39599e-64		Ldlrad4	1.96966	6.98159e-21		Chst11	1.9739	2.02714e-297		Tnfrsf26	1.49962	2.77016e-05
Cyfip1	1.07592	0		Gng2	0.976885	1.68829e-180		Psmb8	1.39504	6.55328e-63		Celf2	1.8845	8.59863e-21		Gsap	1.93443	4.45577e-296		Raf1	1.41754	3.4049e-05
Soat1	1.05242	0		Gm21188	0.605894	2.85827e-180		Tmsb4x	2.1125	1.24027e-62		Sipa1l1	1.87843	3.17848e-20		Alcam	2.30838	3.58254e-294		Fam107b	1.32197	4.91489e-05
Slc43a2	1.05114	0		Tmsb4x	1.31977	4.08254e-180		Zmiz2	0.76803	7.26726e-62		Ptk2b	1.99548	3.47921e-20		Nudt4	1.88292	5.60358e-294		Ptafr	1.07891	5.00878e-05
Cd300c2	1.03763	0		Ctsb	2.05147	6.44724e-180		Bcl2a1a	0.829716	4.36539e-61		Rabgap1l	2.22794	4.71218e-20		Klf2	1.89927	4.82281e-293		Vps37b	1.44854	6.3319e-05
Tbxas1	1.03612	0		Susd3	0.393353	1.00185e-179		Tbc1d8	1.96274	6.19338e-61		Fam107b	1.78899	8.54979e-20		Fbxl5	2.3442	1.08517e-291		Lpin2	1.40851	6.73355e-05
Atp6v1c1	1.03341	0		Gas2l3	0.974359	1.30162e-179		Rap2a	1.11693	6.29248e-61		Itgb7	1.15753	1.50082e-19		Upp1	1.80367	7.49965e-286		Neurl3	1.24511	7.1205e-05
Bcl2a1b	1.03306	0		Lyn	1.29049	1.16287e-178		Sp110	0.551377	7.89782e-60		Fmnl1	0.974543	1.74464e-19		Gfod1	1.99772	9.24909e-286		Atp8b4	1.38346	0.000110788
Clec4a1	1.02432	0		Gla	0.829194	1.23159e-177		Dock10	1.6965	1.0893e-59		Pgm2l1	0.900467	1.98752e-19		Tlr6	0.818071	6.51329e-283		Ptbp3	0.730469	0.000129424
Apobec1	1.02138	0		Ftl1-ps1	1.03658	5.1374e-177		Otulinl	0.849795	1.33672e-59		Il2rg	1.33448	2.95281e-19		Cstdc4	4.36367	7.87273e-281		Grina	0.906685	0.000130638
Cd53	1.01978	0		Tyrobp	1.32607	8.06091e-177		Akna	0.334998	1.69934e-59		Gpr68	0.885891	3.30867e-19		Gda	2.09617	1.70764e-280		Dgat1	1.49265	0.000167446
Emb	1.01373	0		Alox5ap	1.09824	1.35268e-176		Arhgap30	0.66927	2.91921e-59		Zbtb25	0.730442	3.78314e-19		Ptafr	1.64737	1.23924e-279		Cyth1	1.30065	0.000181274
Iqgap1	1.00434	0		Sirpa	1.21831	1.39492e-176		Mir142hg	1.04396	7.60065e-59		Smad7	1.37794	4.18672e-19		Ntng2	1.9268	8.33841e-277		Ankrd44	1.53537	0.000185887
Dmxl2	1.00076	0		Daglb	0.629474	2.47858e-176		Slc25a20	1.1245	3.81787e-58		Sesn3	0.828323	4.43011e-19		Gm20528	1.17699	2.62178e-274		App	0.93986	0.000307417
Nceh1	0.996512	0		Dock2	0.908325	3.22483e-176		Mllt6	0.868017	9.28064e-58		Ccr2	1.83727	4.63601e-19		Fam107b	1.95592	4.74752e-273		Cd80	1.18819	0.000317497
Slc41a2	0.996099	0		St6gal1	0.781221	5.84582e-176		Fnbp1	1.79629	1.92013e-57		Stk17b	1.61907	9.83056e-19		Diaph1	1.47783	5.05252e-273		Selplg	1.21163	0.000399383
Lilr4b	0.983669	0		AI662270	0.574912	6.26458e-176		Cxcl16	1.82057	2.97642e-57		Gm26740	2.49609	1.04441e-18		Ppp1r3b	1.139	1.21479e-267		Vav1	1.15562	0.000422636
B2m	0.983637	0		Sfmbt1	1.42007	9.62463e-176		Satb1	1.70045	7.23e-57		Nfatc3	1.75864	1.40979e-18		Sema4d	1.81634	4.41539e-267		Rab31	1.52266	0.00083072
Plekho2	0.979124	0		Dock10	1.6626	1.82249e-175		Prex1	1.108	7.64504e-57		Raet1e	1.24892	1.69441e-18		Rab8b	1.51463	4.75205e-267		Plaur	1.46559	0.000861221
Irak2	0.975715	0		Atp6v1c1	1.01081	1.90486e-175		Pgf	0.91947	1.4186e-56		Selplg	1.29833	2.10282e-18		Btg1	1.34002	1.21931e-266		Itgb2	1.12578	0.00118727
Rilpl2	0.970798	0		B2m	1.26036	3.3695e-175		Serpinb9	1.16646	5.77423e-56		Nr4a3	1.67561	3.9474e-18		Atg7	1.94472	1.95373e-265		Zfand3	0.938133	0.00124741
Unc93b1	0.966415	0		Gna13	1.34623	4.66971e-174		Runx2	1.46582	9.93944e-56		Ndfip1	1.68989	7.68615e-18		Gm13986	1.62503	4.03294e-265		Btbd1	0.350332	0.00133344
Pirb	0.960998	0		Galc	0.613288	6.0854e-174		Gfpt1	1.72257	1.25431e-55		Serpinb9	1.2559	1.20133e-17		Cyth4	1.38137	4.25425e-264		Myo1d	1.71173	0.00161969
Iqgap2	0.960346	0		Lat2	0.627273	8.8541e-174		Bach2	2.25413	1.72856e-55		Stk4	2.03195	1.34918e-17		Cyth1	1.75769	2.1772e-263		Rab8b	0.944898	0.00215736
Ctsa	0.949073	0		Cd300a	0.835014	2.91792e-173		Cntrl	0.742411	2.03276e-55		Nfatc2	0.932117	2.80951e-17		H2-Q10	1.20563	5.13349e-263		Atad2b	0.318888	0.00333661
Slc15a3	0.942538	0		Coro1a	0.940944	4.92176e-173		S100a4	2.29353	2.81018e-55		Prkch	2.70196	5.64893e-17		Rnf149	1.59226	1.18491e-261		Pitpna	1.20242	0.00379926
Lilrb4a	0.931548	0		Cd52	1.39498	1.16294e-172		St3gal3	1.27472	5.99571e-55		Bcl2	1.50173	6.0492e-17		Cd80	1.57217	1.58266e-261		Wwp2	1.49412	0.00577154
Cd274	0.930717	0		Slfn2	1.3422	7.05988e-172		Il2rg	0.753877	2.39049e-54		Dgat1	1.88912	6.57376e-17		Fas	1.70242	2.80335e-260		Ezr	1.19013	0.00746597
Rnf128	0.921361	0		Irf7	0.795719	9.13627e-172		Tmem123	1.88451	3.24365e-54		Herc3	1.32184	6.76266e-17		Snx18	1.55207	6.26048e-259		Gm13986	1.34582	0.00876676
Sdc3	0.915933	0		St18	1.04346	2.62766e-171		Pak1	1.29108	4.04129e-54		Bach2	2.73187	7.60977e-17		Fem1c	1.63109	2.55542e-258		Syne1	2.31673	0.00925194
Tgm2	0.906048	0		Trf	1.1876	6.85766e-171		Cst3	2.41303	9.61719e-54		Csnk1g3	1.51689	1.57334e-16		Tlr4	1.75969	1.92627e-255		Hcar2	1.11775	0.00967277
Lpxn	0.903802	0		Rasa4	0.782694	8.2177e-170		Zeb1	1.5503	1.18397e-53		Il7r	1.79656	1.8288e-16		Rac2	1.32815	3.51195e-253		Iqgap1	0.597852	0.0113271
B4galt6	0.903276	0		F13a1	1.74772	1.067e-169		Gucd1	0.602842	1.22787e-53		Sla	0.672535	2.12038e-16		Ifitm2	1.82397	4.53573e-252		Cmss1	0.360419	0.0139963
Adap2	0.892048	0		Rnf130	1.07693	2.08205e-169		Crem	1.10162	1.24559e-53		Polg2	0.606084	3.51099e-16		Csf2rb	1.52679	2.10109e-251		Plin2	0.929859	0.0140459
Igsf6	0.882134	0		Ptpro	0.365219	6.09794e-169		Madd	0.758864	1.50527e-53		Cd82	1.11818	3.64521e-16		Neat1	1.30765	4.23136e-251		Icam1	0.274903	0.0144768
Rassf4	0.879586	0		Slc15a3	0.984781	1.38157e-168		H2afz	1.70914	8.68189e-53		Elmo1	1.80159	4.80302e-16		Ostf1	1.51732	3.1312e-249		Lrrfip2	1.07574	0.0145364
Ifi207	0.875472	0		Traf1	1.31546	5.72561e-168		Laptm5	1.2058	1.2433e-52		Smap2	1.38166	7.01068e-16		Hectd1	1.47541	1.07623e-247		Gk	1.56326	0.0190967
Fcer1g	0.874391	0		Cybb	1.07441	4.05434e-167		Rin3	1.01921	1.89827e-52		Atp8b4	1.63665	9.34571e-16		Gtdc1	1.82684	1.49015e-247		Ralgapa2	0.29051	0.034684
Dusp3	0.874286	0		Lilr4b	1.19548	8.78889e-167		Jak2	1.52855	2.76642e-52		Foxo1	2.47945	1.10225e-15		Optn	1.53883	5.44368e-247		Lpcat2	1.33719	0.0458611
Ms4a6c	0.866847	0		Taok3	0.907725	4.98535e-165		Tctex1d2	0.547733	6.1492e-52		Il18rap	1.23181	3.02343e-15		Rab20	1.47265	2.62923e-246		G0s2	0.606518	0.046912
Arap1	0.858218	0		Ncf4	0.608466	1.03095e-164		H2-Q6	0.824413	6.59464e-52		Nsd3	1.60149	3.04211e-15		Gm5150	1.28582	3.45294e-246
Emilin2	0.852865	0		Emp3	1.14827	1.28966e-164		Arhgap26	1.43213	1.05994e-51		Batf	1.08511	8.2368e-15		Coro1a	1.32527	5.71843e-245
Spi1	0.85178	0		Vav1	0.61837	1.79041e-164		Akap13	1.31407	1.92379e-51		Ctnnd2	1.85711	8.81435e-15		Anxa11	1.62925	2.64075e-244
Fermt3	0.850182	0		Rgs1	1.39551	9.20608e-164		Tmtc2	2.34544	2.23919e-51		Ncor1	1.32794	9.39837e-15		Plaur	1.7117	6.63005e-242
Ccr5	0.849088	0		Cd84	0.92154	2.32372e-163		Antxr2	1.18871	4.45623e-51		Fli1	1.5287	9.44988e-15		Bcl2l1	1.66276	1.11032e-241
Itgb7	0.846596	0		Csf2ra	0.631442	7.36957e-163		Akt3	1.57282	5.01678e-51		4932438A13Rik	1.73332	9.93753e-15		Mefv	1.33346	1.2063e-241
A930007I19Rik	0.835478	0		Slc7a8	1.23478	1.32346e-162		Gm2a	1.27621	6.11993e-51		Chd2	2.01395	1.03136e-14		Cyp4f18	1.80323	2.25096e-240
Rusc2	0.828328	0		Cbr2	1.22086	1.48593e-162		B3gnt5	0.702742	2.79331e-50		H2-Q6	1.33256	1.1521e-14		Lpcat2	1.64978	5.42362e-239
Parvb	0.816238	0		Fem1c	1.1196	1.63436e-162		Tmem131	1.55274	7.12221e-50		Arhgap26	1.30319	1.41388e-14		Cd44	1.26215	3.24359e-236
AI504432	0.812718	0		Tmem37	0.321087	2.02911e-162		Taok3	1.06538	1.71711e-49		Eml5	0.649324	1.64863e-14		Eif1	1.09643	3.83066e-233
Arg2	0.810943	0		Was	0.320031	1.59936e-161		Fmnl1	0.555685	2.75785e-49		Rab8b	1.55955	1.71874e-14		Rab11fip1	1.58708	5.67584e-232
Ptafr	0.810288	0		Ctsa	1.12172	8.11322e-161		Swap70	1.54782	3.41023e-49		Madd	1.12556	2.0351e-14		Mrpl33	1.88875	2.02568e-231
Atp8b4	0.809965	0		St3gal1	1.29612	1.67703e-160		Stk4	1.03713	9.63619e-49		Sp4	1.28242	3.20178e-14		Ahi1	1.51435	3.24542e-231
Slc11a1	0.809162	0		Asah1	0.949943	2.83973e-160		Nhlrc2	1.06725	3.90409e-48		Eml4	1.40462	4.3997e-14		Cd300lb	1.31821	3.18109e-230
Slc37a2	0.804964	0		Nlrp1b	0.371737	3.1004e-160		Rassf3	1.0605	5.20602e-48		Apobec3	1.16328	4.57356e-14		Rhog	1.41301	8.03164e-230
Osm	0.797072	0		Tcirg1	0.900548	8.91821e-160		Calm1	1.70329	5.38565e-48		Hacd3	1.45222	4.87922e-14		Kras	1.53256	1.64073e-229
Ptprc	0.752598	0		Epb41l2	1.33202	1.04246e-159		Stat5b	1.10265	1.14778e-47		Disc1	0.67944	9.54404e-14		Suco	1.68786	6.84184e-228
Lat2	0.745461	0		Specc1l	1.19755	8.14742e-159		Thada	1.4984	1.70443e-47		Akt3	1.57914	9.81421e-14		Babam2	1.75215	5.39324e-227
Adssl1	0.739726	0		Zeb2	1.49748	1.3739e-158		Donson	0.491106	2.37981e-47		Havcr2	1.17234	1.05057e-13		H3f3b	1.25146	1.29448e-226
F7	0.731101	0		A630001G21Rik	0.367173	1.67906e-157		Bcl2a1b	1.41715	2.91414e-47		Gm50012	0.829589	1.18448e-13		Notch2	1.48558	2.0886e-223
Dnase1l1	0.72946	0		Plin2	1.39458	1.75104e-157		Wnk1	2.00671	3.50084e-47		Map3k14	1.33339	3.36243e-13		Rnf144a	1.7799	6.29005e-222
Kcnn4	0.726566	0		Cd74	3.00554	2.98047e-157		Pik3r1	1.9616	1.47912e-46		Gm20275	2.12702	4.02918e-13		Cux1	1.69787	1.24701e-221
Tmem106a	0.725878	0		Arhgap18	1.15129	3.21171e-157		Lmnb1	1.02702	1.83939e-46		Zhx2	2.10653	4.38614e-13		Fam111a	1.38794	1.90844e-221
Pik3r6	0.711944	0		Card19	0.999919	4.63723e-157		Stat5a	1.15046	2.11127e-46		Stat3	1.59387	4.42368e-13		Il1f9	1.98857	2.78493e-221
Ms4a4a	0.704345	0		Abca1	1.49222	1.24581e-156		Arhgap15	1.44385	2.29711e-46		Prelid2	0.976186	5.59324e-13		Il1rn	1.92287	1.17001e-220
Bend4	0.700976	0		Lpin2	1.37553	2.25015e-156		Arl5c	0.777491	4.11092e-46		Hip1r	1.1601	6.1104e-13		Ddx6	1.49299	9.82514e-220
Hcls1	0.68203	0		Eepd1	0.97528	3.36966e-156		Zfp516	1.16086	9.47194e-46		Epb41l2	1.53023	1.09962e-12		Gk	1.79113	1.74256e-219
Tfec	0.675327	0		Hcls1	0.641542	5.99769e-156		Bclaf3	1.15054	2.07172e-45		Med14	1.49689	1.7952e-12		Nabp1	1.39236	4.40174e-217
B3gnt5	0.667789	0		Ptprc	0.942341	1.92757e-154		Synj1	1.11822	4.19762e-45		Srrm2	1.1937	1.87296e-12		Marcksl1	1.71603	7.89136e-216
Clec4a2	0.661571	0		P2ry6	0.390411	3.91412e-154		Relb	1.52457	2.75284e-44		Ssh2	1.65657	2.36284e-12		Mcl1	1.16469	1.10957e-215
Fcgr1	0.650195	0		Arl5c	0.718974	1.03855e-153		Slamf7	0.565239	4.38502e-44		Lrrc8d	1.3737	2.39283e-12		Lrg1	1.63796	3.07825e-215
AI662270	0.617888	0		Rcbtb2	0.736721	1.18085e-153		Dennd5a	1.10573	4.7273e-44		Isy1	1.3367	2.57311e-12		Msrb1	1.62728	5.73929e-215
Cmklr1	0.579464	0		Cyth4	0.561809	2.2888e-152		Hat1	0.70464	6.37549e-44		Cmip	1.17744	2.89169e-12		Cxcl2	2.03976	8.91229e-215
Gm48065	0.57317	0		Vsir	0.727123	6.01044e-152		Cmip	1.04225	8.92802e-44		Prkca	2.21267	4.59507e-12		Mir22hg	1.4441	5.80732e-214
Cd37	0.545719	0		Rgl1	1.42876	1.23176e-151		Pld4	0.558761	3.09696e-43		Sik3	1.29739	6.50893e-12		Pim1	1.32043	5.90193e-213
Dpep2	0.525779	0		Zmiz1	1.2248	1.29941e-151		Cyfip2	0.441447	3.73883e-43		Dok2	0.356066	9.70833e-12		Cd300ld	1.31409	8.40817e-212
Dock2	0.727456	7.88668e-303		Fcgr3	0.761125	2.15995e-151		Gm46224	0.758726	7.24528e-43		Btbd9	1.58564	1.47246e-11		Chd7	1.54691	3.89632e-210
Lgals3	1.02313	1.92648e-301		Apoe	2.10573	3.60236e-151		Mif4gd	0.588532	9.92462e-43		Tshz1	1.18647	1.56673e-11		Tmem38b	1.35125	9.66751e-210
Slc7a11	1.62374	6.57849e-300		Slc43a2	1.01379	3.76205e-151		Pcgf5	1.49121	1.2328e-42		Traf1	1.56563	1.86952e-11		B430306N03Rik	0.88851	1.96611e-209
Tnfrsf9	1.22868	5.57832e-299		Gmfg	0.687195	5.54024e-151		Inpp5d	1.07773	2.34457e-42		Trp53inp1	1.20204	2.33173e-11		Ifitm1	1.91955	1.06475e-208
Ftl1-ps1	0.922113	7.0371e-296		Trps1	1.68471	6.25238e-151		Sh3bgrl3	1.1891	3.31975e-42		Farp1	1.25028	2.84687e-11		Ncf1	1.55449	4.23811e-207
Gns	1.00092	9.10624e-295		Adssl1	0.620522	6.50878e-151		Cxcr4	0.744441	3.77797e-42		Sntb1	1.69026	3.86129e-11		Dusp1	1.56331	1.16976e-206
Naip2	0.512975	2.155e-293		Clec4n	1.11835	1.24652e-150		Nfkbie	0.77839	4.08871e-42		Dock11	1.60743	3.89212e-11		Plin2	1.37494	2.43325e-206
Aif1	0.607907	5.71619e-293		Pla2g15	0.5174	1.41676e-150		Raet1e	0.516542	9.167e-42		Mier1	1.41943	4.64848e-11		Myl12b	1.40652	4.5737e-205
St3gal1	1.00615	5.82933e-293		Tlr7	0.397283	1.60119e-150		Stk38l	1.02421	1.01e-41		Cblb	1.83827	5.18977e-11		Cox17	1.65276	3.16305e-203
Hacd4	0.740128	1.02646e-292		P2rx4	0.913658	2.85323e-150		Coro2a	0.472587	1.53997e-41		Rgs2	2.58206	5.21727e-11		Kpna4	1.59525	2.42993e-200
Mfsd1	0.882339	1.06552e-292		H2-Ab1	2.60332	7.79928e-150		Gosr2	0.748332	1.68148e-41		Cenpq	0.349118	6.65338e-11		Dennd1c	0.888547	6.43538e-200
Arl4c	1.02351	2.94533e-292		Dnase1l1	0.624079	7.49268e-149		Tmem120b	0.985686	2.23673e-41		Birc2	0.818023	7.41251e-11		Cebpb	1.27267	3.65689e-199
Kdm7a	1.1131	3.94286e-292		Mmp19	1.78438	1.96198e-148		Rgs10	0.844702	4.01594e-41		Nr3c1	2.02887	7.98596e-11		H3f3a	0.941423	1.04451e-198
2510009E07Rik	0.938007	6.40405e-292		Mxi1	1.43527	2.58193e-148		Irf5	0.695962	4.8927e-41		Ankrd11	1.12077	1.29796e-10		Gpcpd1	1.57444	2.15284e-198
Gm2a	0.757517	3.48341e-290		Atp6v0c	1.09909	5.34004e-147		Bhlhe40	1.33921	9.60656e-41		Tmem123	1.30198	1.37497e-10		Lamp2	1.33926	9.39657e-198
Sh3bp5	1.01317	3.10334e-288		Zdhhc14	1.73492	6.7918e-147		Nr4a2	1.39622	9.63453e-41		Fyb	1.83155	2.09817e-10		Cmip	1.38612	6.97364e-196
Nlrp3	0.959269	9.24723e-288		Selenop	2.40501	1.40337e-146		Pde4b	1.24898	2.9294e-40		H2-Q4	0.804651	2.71674e-10		Ell	1.41112	3.78814e-195
Tmem189	0.889479	1.46304e-285		Ern1	1.71461	1.99303e-146		Wipf1	1.19001	3.2335e-40		Lcp1	0.971707	2.83191e-10		Gm31718	1.30905	6.61051e-194
Fcgr3	0.645846	7.0706e-285		Il2rg	0.621563	5.09105e-146		Sp140	0.687004	3.8818e-40		Ppp1r12a	1.2413	3.17763e-10		Ccl6	1.91834	7.31663e-194
Sh3bgrl	0.979708	1.09417e-282		Sdcbp	1.15674	8.75655e-146		Rassf2	0.715611	4.27036e-40		Trbc2	0.843174	3.73138e-10		Gab2	1.37426	3.08639e-191
Sod2	1.20446	5.40838e-282		Lamp1	1.21514	1.19158e-145		Ncf1	0.924954	5.42497e-40		Msi2	1.70814	4.04325e-10		Mmp9	1.2328	3.96499e-191
S100a4	1.2105	2.70663e-281		Arap1	0.696304	2.53998e-145		Dock8	0.776929	5.43017e-40		Lncpint	1.43667	4.52872e-10		Nfe2l2	1.33246	4.85094e-191
Lair1	0.47589	1.72987e-279		Lilrb4a	0.95786	8.08884e-145		Csf2ra	0.547987	1.47055e-39		Cdc42se2	1.12705	4.97441e-10		Hk3	1.07696	1.18622e-190
Spp1	2.07332	4.79226e-279		Cotl1	0.97455	1.01338e-144		Ttc7b	0.807921	1.777e-39		Map4k2	0.674431	5.48408e-10		Adam8	1.38027	1.42355e-188
Gde1	0.876965	6.18672e-279		Ubl3	1.01591	2.45681e-144		Rab43	0.955162	1.83173e-39		Uty	2.44382	6.09007e-10		Alas1	1.26273	2.22714e-188
Cd48	0.502889	9.97584e-279		Gm15726	0.789926	4.80666e-144		Ccr5	1.68893	2.57405e-39		Coro2a	0.683694	7.17153e-10		Elmo1	1.42536	7.10129e-188
Sirpb1c	0.502582	2.24255e-278		Tmem8	0.514289	1.38163e-143		Traf6	0.965782	2.64391e-39		Glcci1	1.66281	7.44495e-10		Sdcbp	1.15502	7.49669e-188
Emp1	0.982307	9.1356e-277		Rnf149	1.1548	2.78893e-143		Sub1	1.15123	7.15928e-39		Vrk1	0.836175	7.51968e-10		Snap23	1.40387	1.10183e-187
Rassf2	0.628761	2.22203e-276		Hpse	0.485901	7.57636e-143		Abcc4	1.26605	7.18668e-39		Gpr132	1.17604	7.74954e-10		Pla2g7	1.43686	8.37551e-187
Esd	0.992156	6.22633e-276		Slc11a1	0.799677	1.00397e-142		Ptcd2	0.443658	9.60886e-39		Arap2	1.65045	8.17177e-10		Ubap1	1.4356	2.07717e-186
Renbp	0.622885	1.59908e-275		Ly6e	1.45051	2.07733e-142		Gdi2	1.18211	9.80108e-39		Zc3hav1	1.58786	8.50797e-10		Raf1	1.65035	3.23326e-185
Pstpip1	0.538047	4.0647e-273		Slc35f6	0.547049	3.11316e-142		Prcp	0.836342	2.23298e-38		D16Ertd472e	1.33311	9.13961e-10		Malat1	0.720989	3.14344e-184
Tcirg1	0.800979	5.58176e-272		Grik3	0.525588	8.05557e-142		Limd2	0.417677	4.22305e-38		Slc9a9	1.5846	9.70869e-10		S100a6	1.44144	6.67715e-184
Rabep1	1.00169	1.10622e-271		Slc25a28	0.780646	8.19145e-142		Ass1	0.798627	5.05419e-38		Plcl2	0.972138	9.86879e-10		Sik3	1.34296	1.12038e-183
Gpr137b	0.761717	1.97644e-271		Man2b1	0.817946	1.13264e-141		Uvrag	1.30244	5.47202e-38		Tecpr1	1.2026	1.11285e-09		Por	1.35298	7.9694e-181
Blvrb	1.01051	4.30216e-270		H2-Eb1	2.54607	1.38175e-141		Tmem39a	1.45466	5.61349e-38		Hs3st3b1	0.902596	1.28612e-09		Slc16a3	1.45577	5.20008e-179
Ncf2	0.558974	1.12552e-269		Map4k4	1.44166	1.72024e-141		Sema4a	0.546893	1.11284e-37		Rai1	1.0831	1.36755e-09		Ccl3	3.06174	5.6006e-178
Fam129b	1.08811	3.93194e-269		H2-D1	1.05112	2.4302e-141		Ccdc88a	1.40845	1.12327e-37		Cers4	0.791848	1.51562e-09		Itgal	0.90144	1.34394e-177
Rnf130	0.862943	1.67308e-268		Zfand2a	0.82733	3.21065e-141		Sdccag8	0.750463	1.20795e-37		Bin2	0.47913	1.52792e-09		Sp100	1.44752	2.90309e-176
Ifi211	0.880238	1.3056e-267		Slc9a9	1.50628	5.35994e-141		Aph1c	0.445053	4.54148e-37		Pitpnm2	1.10997	1.9851e-09		March7	1.21096	4.38693e-175
Nrp2	0.908974	1.52665e-267		Pip5k1c	0.602947	1.51357e-140		Mreg	2.20403	4.69646e-37		Nmrk1	0.688051	2.04315e-09		Tnfrsf1b	1.2145	6.59305e-174
Golph3l	0.749124	2.61539e-267		Gngt2	0.834245	4.61344e-140		Psme1	0.943353	6.09912e-37		Zfp53	1.24247	2.0652e-09		Irak3	1.53864	8.5211e-172
Ccl6	1.45295	3.7883e-267		Nfkbie	0.766262	4.76371e-139		Dnajb14	0.642232	7.65088e-37		Rhoq	1.86335	2.08319e-09		Ehd1	1.33145	2.53822e-171
Ptpre	0.942818	1.83393e-266		Mcl1	1.14869	1.82132e-138		Naga	0.466428	9.10501e-37		Lrba	1.40402	2.45183e-09		App	1.12912	5.15465e-171
Nus1	0.936427	8.75529e-266		Crlf3	0.806621	3.39552e-138		Bend4	0.863473	1.41947e-36		Mmd	1.43532	2.58878e-09		Morrbid	1.82304	2.22201e-169
Atp6v1a	0.95094	5.36188e-265		Apoc2	0.788386	1.63681e-137		Baz2b	1.04321	1.5298e-36		Tasp1	1.36325	2.61863e-09		Spi1	1.20063	1.31794e-168
Met	1.4346	4.91428e-263		Cndp2	0.903789	2.17673e-137		Dapk1	1.20249	2.78084e-36		Pak2	0.918718	2.68454e-09		Amn1	1.30062	2.01668e-168
Snx10	0.839569	1.28357e-262		Myom1	0.494847	2.84682e-137		Tent5c	0.329955	2.80101e-36		Slc37a3	1.01472	3.53063e-09		Slc16a6	1.27	2.18725e-168
Myo5a	1.16229	1.89261e-262		Acp2	0.606051	5.32474e-136		Nfkbid	0.699665	6.26358e-36		Sh3kbp1	1.45005	3.74493e-09		Rasa2	1.51027	1.52841e-166
Arl8a	0.752491	3.1203e-262		Mefv	0.739809	1.66481e-135		Pvr	0.816132	8.0643e-36		Kmt2a	1.28991	4.13816e-09		Vasp	1.2766	3.94311e-166
Emp3	0.956243	4.92945e-262		Grk3	0.454346	2.39166e-135		Arih2	1.08391	8.20962e-36		Hsd11b1	0.650419	4.17719e-09		Dgat2	1.32498	6.96674e-166
Glipr1	0.574093	5.53521e-262		H2-Aa	2.75902	5.3035e-135		Got1	1.03939	1.22823e-35		Rapgef6	1.56523	4.66367e-09		Jdp2	1.13907	6.9848e-165
Pilra	0.519245	4.52403e-261		Soat1	0.863016	1.12851e-134		Alcam	1.2638	1.98577e-35		Dennd5a	1.52045	4.84904e-09		Ndel1	1.33349	2.17631e-162
Ikbke	0.778888	6.64196e-261		Fnip2	1.41949	1.32184e-134		Ankrd44	0.937245	2.92081e-35		Cpm	1.05936	6.74276e-09		Btk	0.925297	3.53732e-162
Tm6sf1	0.614237	6.98161e-260		Pdxk	0.543381	1.37162e-134		Actb	1.08607	2.97923e-35		Gem	1.76496	6.81465e-09		Ncf4	1.04284	3.54739e-162
Mob3b	0.938621	4.29528e-258		Wdfy4	0.396944	1.43952e-134		Epb41	1.17893	3.97202e-35		Rasa2	1.63411	7.62225e-09		Vav1	1.17796	8.20435e-162
Nrros	0.738576	1.41038e-257		Csf2rb	1.10294	2.36843e-134		Ctsz	1.01713	4.95988e-35		Rin3	1.04555	8.80079e-09		Cd274	1.76768	1.65611e-161
Snx18	0.886894	2.42889e-257		Il10rb	0.721553	4.0147e-134		Dock2	0.878013	5.0666e-35		Galnt6	0.907079	8.80247e-09		Tmem189	1.20167	4.22769e-161
Plcl2	0.743066	8.54194e-257		Plekho2	0.816966	5.79203e-134		Kdm2b	1.06155	6.87548e-35		Dapp1	1.21446	8.88004e-09		Btbd9	1.68289	1.01657e-160
Malt1	1.4673	1.23721e-255		Tent5c	0.418862	6.35884e-134		Pmvk	0.766102	8.71797e-35		Rbm39	0.809522	8.91822e-09		Vps4b	1.27198	1.15112e-160
Tyrobp	0.675896	1.48187e-254		Id2	1.24952	1.40239e-133		Casc3	0.772029	1.93322e-34		Jmy	1.77611	8.96188e-09		Trim30a	1.42782	7.37688e-160
Mmp14	0.970183	1.84492e-254		Plek	1.00782	3.44951e-133		Birc2	1.00538	2.6761e-34		Ctla2a	2.32175	1.23376e-08		Trim12a	1.05886	3.2195e-158
Slc25a37	0.709051	6.69571e-254		Arhgap15	0.778618	3.71341e-133		Ccm2	0.633039	3.05842e-34		Heca	1.17631	1.28276e-08		Hp	1.24785	1.00788e-157
M6pr	0.843756	8.09482e-254		Gns	0.995105	4.46301e-133		Dok1	0.258487	4.82416e-34		Mical1	0.538417	1.3898e-08		Fam114a1	1.35449	6.24603e-157
Specc1	0.975646	1.08447e-252		B3gnt5	0.660317	7.23265e-133		Vrk1	0.446158	8.53595e-34		Ccdc88b	0.464116	1.39106e-08		Arpc3	1.28912	1.67616e-156
Pacs2	0.66662	4.23467e-252		Vamp4	0.999738	2.94218e-132		Tyrobp	0.850117	1.35243e-33		Sema6d	1.27298	1.49224e-08		Hcst	0.827873	2.70436e-155
Atg4c	0.611573	5.54924e-252		Tnfsf13	0.423852	3.00977e-132		Iscu	0.617497	1.4001e-33		Ppp1cc	1.02395	1.58632e-08		Polr2a	1.30479	5.10151e-155
Anxa4	0.882012	1.37658e-251		Lmbrd1	1.04015	4.09071e-132		Stxbp3	1.01725	1.60748e-33		H2-Q7	1.49859	1.6357e-08		Fam71f2	1.09553	3.24169e-154
Mxi1	1.26082	1.79756e-251		Tbxas1	0.550067	4.38974e-132		Apobec3	0.527377	2.31225e-33		Prrc2c	1.11262	1.68421e-08		Rap1gap2	1.22988	1.59929e-152
C5ar1	0.598367	2.63976e-251		Rftn1	0.964087	5.60466e-132		Isy1	0.694918	3.13909e-33		Plscr1	0.910956	1.72389e-08		Prdx5	1.11435	1.96611e-152
Gnptab	0.930626	2.08795e-250		Pacs2	0.633905	1.99138e-131		Sod1	0.849293	5.94556e-33		Cnnm2	1.39127	1.80818e-08		Chd2	1.25896	7.76891e-152
Cbl	1.01215	2.83221e-250		Tmem189	0.896431	2.73264e-131		Tbc1d9	0.762514	1.07497e-32		Itga4	2.4459	2.10687e-08		Ccnl1	1.02931	9.53356e-152
Apoe	1.53509	8.68315e-250		Neu1	0.559655	3.26029e-131		Ero1lb	0.476113	1.23632e-32		Ncoa2	1.29469	2.25908e-08		Marcks	1.17448	1.59596e-151
Dgkz	0.818414	9.58981e-250		C5ar1	0.72285	4.8964e-131		Ly86	0.435944	2.84346e-32		Rbl2	1.21767	2.47245e-08		Kctd12	1.36239	1.65011e-149
Aldh3b1	0.418647	2.07056e-249		E230029C05Rik	0.867275	6.84358e-131		Tut4	1.02739	3.27798e-32		Slc7a1	0.967639	3.32092e-08		Spag9	0.984904	2.1499e-147
Cxcr4	0.866055	3.28559e-249		Osbpl8	1.36665	8.03842e-131		Dusp5	1.15674	4.20674e-32		Aebp2	1.55588	3.58878e-08		Inpp5d	1.25713	4.28043e-147
Anxa5	0.86535	3.85564e-247		Itgb2	0.675333	8.21737e-131		Ucp2	0.996971	1.6883e-31		Clcf1	0.476468	3.87291e-08		Dennd4a	1.305	8.88487e-147
Ifnar1	0.774885	4.13733e-246		Hck	0.549163	1.45938e-130		Cyld	0.775148	2.13316e-31		St3gal6	0.955007	3.98069e-08		Adipor1	1.13987	5.01935e-146
Prex1	0.841446	6.68274e-246		Arpc3	0.969014	6.21925e-130		Cfp	0.758241	2.65014e-31		Aim2	1.20542	4.03318e-08		Nt5c2	1.35633	4.27335e-145
Elk3	0.873782	1.11453e-245		Tmem104	0.438677	8.31653e-129		Aftph	0.777842	3.07809e-31		Bpnt1	0.899965	4.30243e-08		Gm16599	0.932464	1.64268e-144
Dazap2	0.866685	4.00485e-245		Cd38	0.830783	1.0954e-128		Ubxn2a	0.557808	5.76205e-31		Def6	0.706403	4.56787e-08		Itgb2	1.03858	2.60845e-144
Ifnar2	0.90562	6.61324e-245		Lgals3	1.29405	2.11693e-128		Zfp106	0.811062	5.83552e-31		Tnfrsf18	0.952862	5.41881e-08		Atf7ip	1.2793	7.17588e-144
Pira2	0.490268	9.47784e-245		Lgals3bp	0.801052	4.06922e-128		Ubl3	1.06987	7.04583e-31		Tgfbr2	1.2085	8.31708e-08		Nfam1	0.836498	8.44952e-144
Hck	0.604632	4.0637e-244		Gnpda1	0.416254	5.12482e-128		Ccdc167	0.416156	7.25041e-31		Ntng2	0.976473	8.64856e-08		Pde7b	1.5618	1.73953e-143
Csf2rb	0.690848	1.23203e-243		Lcp1	0.936994	5.58587e-128		Ppm1m	0.283009	8.20893e-31		Sept11	1.0174	9.83308e-08		Arhgap30	0.932098	2.59299e-143
Ucp2	0.881826	1.70158e-243		Stab1	0.899565	8.46614e-128		Mvp	0.688142	9.52377e-31		Lrrc8c	1.20423	1.07062e-07		Zfand3	0.982341	9.8727e-143
Pitpnc1	1.57537	4.33642e-243		Scpep1	0.854132	2.11428e-127		Smchd1	1.00058	1.30866e-30		Zdhhc18	0.892985	1.13144e-07		Mapkapk2	1.2337	2.12641e-142
Lipa	0.872949	5.41497e-243		Aoah	0.668734	1.8958e-126		Ggta1	0.878653	1.3811e-30		Rapgef1	1.10677	1.2669e-07		Rab31	1.44278	3.22301e-142
Ccl24	1.26087	1.22824e-242		Irak2	0.945669	1.98187e-126		Itgb7	0.401333	2.01604e-30		Traf4	0.515588	1.30109e-07		Thbs1	1.35489	4.41105e-141
Tnip3	0.588732	1.44913e-242		Gusb	0.552585	5.63335e-126		Ptger4	0.798805	2.09414e-30		Rab43	0.958143	1.38719e-07		Tmcc1	1.90334	1.07792e-139
Rasa4	0.703983	3.86893e-241		Hpcal1	0.773836	1.53841e-125		Osgin2	0.560041	2.58987e-30		4930523C07Rik	0.903717	1.48743e-07		Slfn2	1.31398	4.15087e-139
Gm21188	0.499707	5.74905e-241		Tpd52	0.969494	6.72165e-125		Elovl5	0.725921	2.83853e-30		Gtpbp1	0.89593	1.58511e-07		Arhgap25	0.964436	4.24322e-139
Hif1a	0.960232	2.18548e-240		Cerk	0.938047	1.09766e-124		Gab2	1.01267	4.39497e-30		Auh	0.8964	2.01523e-07		Basp1	1.42379	5.51464e-139
Plcb1	1.22743	2.19262e-240		Ifi204	0.858695	1.10295e-123		Tm6sf1	0.929499	7.71469e-30		Elf1	1.02876	2.12731e-07		Zeb2	0.957979	1.15616e-138
Rnf149	0.934888	3.29171e-240		Osm	0.70907	2.10606e-123		Mthfs	0.667709	1.00528e-29		Vps54	2.04925	2.17486e-07		Vmp1	1.02408	9.07402e-137
Pgk1	0.944964	4.78036e-240		Tnfrsf11a	0.811798	2.21319e-123		Hivep1	1.00401	1.22583e-29		Myl12b	1.09145	2.27732e-07		Lasp1	1.25813	1.70111e-135
B4galt5	0.886896	1.53375e-239		Anxa4	0.876833	2.36812e-123		Il10ra	0.440349	1.29016e-29		Sik2	0.841973	2.8916e-07		Ccrl2	2.09201	8.35285e-135
Pla2g4a	1.51321	1.24366e-238		Itgam	0.663786	3.43331e-123		Smim3	0.568977	2.19455e-29		Wnk1	1.24922	3.09793e-07		Fndc3b	1.017	1.81253e-133
Il10ra	0.506603	1.70071e-238		Bend4	0.854182	3.64088e-123		Epb41l2	1.07829	2.65503e-29		Zbtb46	1.12995	3.33331e-07		N4bp1	1.49773	1.86857e-133
Sqstm1	1.04611	4.34835e-238		Fth1	1.084	5.4074e-123		Mpc1	0.793742	3.96959e-29		Kansl1	1.20144	3.41532e-07		Tes	1.3596	2.08459e-133
Zfand2a	0.759831	4.88267e-238		Ccl9	0.988779	1.66608e-122		Slc29a3	0.391647	4.15681e-29		Mta3	1.20685	3.5989e-07		Ltb4r1	1.12765	1.03852e-131
Mtpn	0.936241	5.93981e-238		Zfp516	0.976898	1.73789e-122		Apaf1	0.812488	6.51908e-29		Rock1	1.08353	3.96156e-07		Tut7	1.1468	1.22728e-130
Snx30	0.78996	7.07282e-238		Cysltr1	0.369263	1.80547e-122		Cyba	0.965024	7.03157e-29		Oxr1	1.00299	5.42546e-07		Rin3	1.07342	1.32117e-130
Rap1b	0.843131	1.82894e-235		Adora2b	0.777204	3.04708e-122		H2afy	0.842879	8.06632e-29		Parp8	1.96189	5.8849e-07		Igsf6	1.15549	2.81273e-130
Sgpl1	0.919469	1.97765e-235		Zeb2os	0.305107	3.17069e-122		Ctss	0.579068	8.66424e-29		Jak1	1.0792	6.06691e-07		Lrrc25	0.794283	1.02523e-129
Traf1	0.658828	2.1568e-234		Por	1.04289	1.3212e-121		Pank2	0.668194	1.18663e-28		Nsmaf	0.787452	6.96314e-07		Hck	1.23399	2.19336e-129
Slamf7	0.598321	1.26306e-233		Crem	0.838358	1.50474e-121		St3gal1	1.01377	1.24914e-28		Wrn	0.9642	7.98553e-07		Csf2ra	0.940194	2.18552e-128
Sh2b2	0.670834	1.79031e-233		Cd53	0.692153	3.07957e-121		Cenpl	0.301541	1.493e-28		Unkl	0.504521	8.65012e-07		Pfkfb3	1.32364	2.20439e-128
Txnrd1	0.983757	2.42665e-233		Dennd1a	1.27664	9.27785e-121		Crlf3	0.723153	1.50436e-28		Zbtb20	1.27468	9.09065e-07		Il10rb	1.1207	2.22535e-128
Rab7b	0.814599	2.56694e-233		Tgm2	0.871317	1.56681e-120		Golph3l	0.663573	1.59562e-28		Tnfaip3	1.53376	9.66164e-07		Dusp5	1.17879	1.36576e-126
Nampt	0.794693	1.67567e-232		Rasgrp4	0.327548	1.74344e-120		Fermt3	0.439024	1.83039e-28		Plekha5	1.07146	9.9016e-07		Wwp2	1.21038	3.27363e-125
Asah1	0.730126	8.18002e-231		Nufip1	0.850967	4.4654e-120		Ncf4	0.504803	2.43402e-28		Stk10	1.07664	1.11549e-06		Cd84	1.32267	4.46024e-123
Slc22a4	0.814487	1.33633e-230		Myo5a	1.16416	7.7248e-120		Arhgef10	0.5783	3.50789e-28		Mbd2	1.25634	1.2935e-06		Dusp16	1.75487	1.37657e-122
Mefv	0.52976	1.46565e-229		Rnasel	0.717884	8.7097e-120		Sipa1l1	1.17844	3.68045e-28		Peli1	1.28357	1.41784e-06		Cd24a	1.31697	8.62006e-120
Lrp1	0.861983	1.03927e-228		Creg1	1.0432	1.98858e-119		Scin	1.21857	4.3454e-28		Git2	1.1915	1.5029e-06		AI839979	0.824462	2.0506e-119
Fem1c	0.802338	1.45917e-228		Gpalpp1	0.914492	8.32907e-119		Rgs2	1.10254	4.49725e-28		Lcp2	0.766118	2.26654e-06		Pirb	1.01978	4.21944e-119
Neu1	0.577529	1.77956e-227		Ifnar1	0.824445	9.2162e-119		Cystm1	0.406178	1.31026e-27		Scai	0.658467	2.27679e-06		Pts	1.09913	4.49246e-118
Cd300ld	0.503031	1.29455e-226		Dusp5	0.876797	1.14143e-118		Baz1a	0.803858	1.76235e-27		Kmt2e	0.996368	2.76967e-06		Selenon	1.10658	5.86147e-118
Edem1	0.871882	1.60431e-226		Bst2	0.851555	1.35512e-118		Eipr1	0.513158	2.12614e-27		Elovl5	1.01808	2.89451e-06		Gla	1.0832	7.81143e-118
C1qc	1.06437	1.71741e-226		Cd14	1.41638	1.36162e-118		Cyfip1	0.889973	2.41036e-27		Rap1a	1.1878	3.00255e-06		Asprv1	1.15817	4.04978e-117
Gng2	0.657764	2.20198e-226		Cmip	1.04658	1.7873e-118		Pcyt1a	1.33208	2.56455e-27		Zdhhc2	1.06838	3.25614e-06		Kansl1l	1.55054	5.03914e-116
Tarm1	0.453806	3.10764e-226		Pparg	0.715285	5.63693e-118		Atmin	0.340056	2.82505e-27		Rsbn1l	1.12443	3.62055e-06		Efhd2	0.96625	1.1263e-115
Il10rb	0.654818	2.53126e-225		Gpr35	0.562868	1.439e-117		Tnfaip8	1.02786	2.87481e-27		Tmem243	0.912719	3.90705e-06		Btg2	1.00508	7.23467e-115
Acp2	0.569312	2.7888e-225		Arhgdib	0.921872	4.74568e-117		Stxbp6	1.24143	2.93344e-27		Tgfb1	0.976304	4.3238e-06		Tnrc6b	1.44724	1.03757e-114
Cyp4v3	0.477086	2.36799e-224		Blvrb	0.982078	1.0105e-116		Ago2	0.797418	4.1403e-27		Mgat5	1.7905	4.9452e-06		Rbks	0.956728	7.53036e-114
Ncf4	0.460206	8.20213e-223		Cyth1	0.941377	1.47938e-116		Irak4	0.38635	4.30529e-27		Clcn3	1.22458	5.75785e-06		Raet1e	0.774763	1.19965e-113
Slc48a1	0.826594	1.31233e-222		Rac2	0.427673	2.06017e-116		Sik3	0.90587	1.29356e-26		Ago2	0.905695	5.95753e-06		Ftl1	0.848301	3.92132e-113
Mtss1	1.25152	2.77757e-222		AI504432	0.474012	2.36909e-116		Spag9	0.873949	1.45869e-26		Arl6ip5	1.12704	6.22692e-06		Gadd45a	1.18343	1.61767e-112
Lcp2	0.580397	2.56096e-221		Pxn	0.798197	3.50315e-116		Fam49b	0.88657	1.50085e-26		Pag1	0.841884	6.43633e-06		Map1lc3b	1.0659	1.08469e-111
Lst1	0.605909	1.46074e-220		Cln8	0.590474	5.92603e-116		H2-Q7	1.01926	2.19654e-26		Lbh	0.419017	7.44856e-06		Runx1	1.52392	1.12058e-111
Ptprj	1.04512	2.06362e-220		Lncpint	1.09385	1.00111e-115		Gabarapl1	0.765204	3.08829e-26		Eif4g3	0.899635	7.85728e-06		Ptbp3	0.79291	2.60324e-111
Arhgap24	1.15647	1.62849e-219		Dmxl2	0.536181	1.44645e-115		Plcg2	0.549508	3.49642e-26		Phf6	1.0998	8.36168e-06		A330023F24Rik	0.999466	3.09091e-111
Vamp4	0.800106	1.2588e-218		Pstpip1	0.437013	1.86616e-115		Plac8	1.59635	3.56618e-26		Ankrd12	1.43889	8.40927e-06		Cytip	0.966507	6.13698e-111
Mir142hg	0.423616	2.76166e-217		Ifnar2	1.03094	1.887e-115		Plekho1	0.469735	4.34372e-26		Elf4	1.00987	1.24589e-05		Vps37b	1.43158	2.77566e-110
Slc8b1	0.613599	7.3549e-216		Mfsd1	0.747706	1.89322e-115		Atox1	0.889876	4.92701e-26		Phc3	1.0654	1.24662e-05		Ankrd44	1.46485	3.25219e-110
Mafg	0.806517	1.60353e-215		Mertk	0.54385	3.557e-115		Zfc3h1	1.00888	6.22657e-26		Riok1	0.796368	1.58015e-05		Arhgap26	1.22707	7.18857e-110
C1qb	1.07813	2.52245e-215		Rab8b	1.09686	6.7851e-115		Cyth4	0.5444	7.4226e-26		Ap3b1	1.07087	1.7603e-05		Mbnl2	1.19616	7.55792e-110
Fnip1	0.94675	2.51903e-212		Parvb	0.563409	1.84473e-114		Foxp1	1.0327	1.08514e-25		Gm20186	1.32673	1.85836e-05		Stk17b	1.34737	8.60088e-110
Fam49b	0.86524	9.39949e-212		Tgfb1	0.702744	4.88553e-114		Lrrfip1	0.877563	1.4783e-25		Pacs1	1.33859	2.09908e-05		Trpv2	0.93274	1.62041e-108
Atp6v0c	0.733712	4.58636e-211		Dusp3	0.647775	1.33504e-113		Zfp667	0.383766	1.63431e-25		Cerk	1.19452	2.24299e-05		Ier5	1.06098	1.95187e-108
Plekho1	0.574584	6.98895e-211		Kcnk13	0.728594	2.29345e-113		Usp12	0.595934	1.96599e-25		Hcst	0.436484	2.27226e-05		Card19	1.08118	2.17066e-108
Slc38a6	0.959317	7.09763e-210		Xylt2	0.428204	2.41114e-113		Gpsm3	0.367561	2.19879e-25		Utrn	1.11153	2.46438e-05		Trib1	1.15688	8.08045e-106
Rbms1	0.720191	4.70463e-209		Stard8	0.451859	2.66733e-113		Srebf2	0.702959	2.30524e-25		St3gal3	1.56183	2.79947e-05		Mtmr6	1.09776	4.89157e-104
Cd44	0.729198	1.25555e-208		Dot1l	0.954822	6.65008e-113		Mmd	0.832613	2.44857e-25		Rfx3	0.93238	2.91431e-05		Fcgr4	0.790962	4.25905e-102
Csf2ra	0.492788	1.46539e-208		Sp110	0.352491	1.71062e-112		Arhgef2	0.592549	2.52104e-25		Tpst2	0.822074	3.43807e-05		E330009J07Rik	1.07387	4.55977e-102
Gpalpp1	0.763892	2.75898e-208		Camk1	0.570022	2.09041e-112		Fau	0.678764	2.53109e-25		Mycbp2	0.917848	4.17305e-05		Spata13	0.987298	6.32628e-102
Dse	0.709868	3.03797e-208		Lrmda	1.17783	7.03037e-112		Plbd1	1.05459	4.09506e-25		Lats2	0.855458	4.43783e-05		Alox5ap	0.985968	1.18457e-101
AB124611	0.380415	4.66288e-207		Bach2	1.36211	8.60274e-112		Ifnar1	0.696549	4.11676e-25		Orai1	1.0524	4.58573e-05		Myo1d	1.58656	1.89285e-101
Smpdl3a	0.705891	2.77502e-205		Adcy7	0.497849	5.36912e-111		Fcho2	0.796341	5.68712e-25		Tcf12	1.42653	4.58674e-05		Nsd3	1.07424	2.24964e-101
Ifi204	0.625397	1.06375e-204		Atp8a1	0.688356	1.99216e-110		Slc7a1	0.802186	6.49369e-25		Mtmr12	0.706426	4.67809e-05		Plk3	0.949133	2.52461e-101
Alcam	0.88038	5.88241e-204		Sgpl1	0.944686	2.50467e-110		Mgat4a	0.406001	6.52265e-25		Atxn7	1.0534	4.78882e-05		Arhgap15	1.30293	7.38854e-101
Mctp1	0.608766	1.689e-203		Iqgap1	0.871108	1.66426e-109		Pirb	0.357075	9.29438e-25		Ski	0.966442	5.62172e-05		Lst1	1.06087	7.7169e-101
Itga1	0.802006	2.62359e-203		Grb2	0.901691	2.22421e-109		Rab8b	0.848365	1.04698e-24		St6gal1	0.905689	5.64983e-05		Pdlim7	0.945213	9.81221e-101
March1	0.652791	2.92935e-203		Cmklr1	0.359836	2.34194e-109		Gtpbp1	0.46464	1.36811e-24		Dtnb	1.05789	5.69318e-05		Gpr132	0.960706	1.149e-100
Tnfaip2	0.818197	7.25632e-203		Tnfsf12	0.445395	3.80538e-109		Purg	0.490275	1.51047e-24		Ss18	1.05496	5.83099e-05		Gabarap	0.754518	2.91565e-100
Tank	1.02158	2.64003e-202		Atp13a2	0.50466	5.90397e-109		Atg16l2	0.325842	1.77991e-24		Rasgrp1	0.865236	6.73377e-05		Pilra	0.81255	3.40913e-100
Gab1	1.09034	5.86393e-202		Emilin2	0.785217	7.42294e-109		Ezh2	0.596061	1.80026e-24		Slc1a5	0.79224	6.86236e-05		Psd4	1.06527	3.51876e-100
Grina	0.671168	5.27263e-201		Tgfbi	1.6487	9.35427e-109		Crtc3	0.799874	1.83809e-24		Thy1	0.972721	7.06604e-05		Lrrfip1	0.932651	8.78695e-100
Myo1f	0.465824	5.53596e-201		Eif4e	1.37181	1.27223e-108		Rnf8	0.495685	2.34928e-24		Thada	1.10067	7.17535e-05		Bst1	0.91264	1.50041e-99
Slc27a1	0.498972	9.30298e-201		Lair1	0.352513	2.36405e-108		Lyn	0.889266	2.7485e-24		Birc6	0.98168	7.26817e-05		Tmsb4x	0.688581	6.37533e-99
Rapgef1	0.888053	1.19196e-200		Myo1f	0.448158	2.97268e-108		Cd48	0.293879	4.01517e-24		Bicra	0.937764	7.43545e-05		Lamb3	0.765049	8.69865e-99
Nlrc4	0.475674	3.93878e-200		Hacd4	0.581028	5.11839e-108		Mpp7	1.36612	5.30763e-24		Dip2b	1.27874	7.95013e-05		Lrrfip2	0.981358	5.56911e-97
Bri3	0.770671	8.89052e-200		Etv6	1.27067	5.84631e-108		Mapkapk3	0.757799	7.54652e-24		Itgav	1.64549	8.63065e-05		Aim2	0.927756	9.83301e-97
Cdk14	0.940617	2.91558e-199		H2-K1	0.932782	1.71625e-107		Ube2e3	0.549066	8.99484e-24		Aak1	1.03233	9.85306e-05		Birc3	1.20432	1.42457e-96
Itgav	1.09787	8.47924e-198		Abhd12	0.724095	2.06451e-107		Arl5a	0.934907	9.68821e-24		Cog5	1.0356	0.000101513		Pygl	1.05711	1.42004e-95
St8sia4	0.869066	1.25212e-196		Rap1a	1.00467	4.14044e-107		Zkscan17	0.373497	1.30423e-23		Reps1	1.22946	0.00010234		Sirpb1c	0.819026	7.42041e-95
Xdh	0.902595	1.83672e-196		Crlf2	0.405206	5.29257e-107		Gramd4	0.434124	1.60442e-23		Rfx7	1.12119	0.00011013		Nab1	1.04339	8.14948e-95
Tpd52	0.543886	2.5423e-196		Snx18	0.801235	6.75382e-107		Zfand3	0.815527	2.37353e-23		Cnot4	0.880319	0.000117073		Lpin2	1.11116	1.40576e-94
Mmp8	1.19051	4.30554e-196		Csf2rb2	0.585111	1.4666e-106		Slc38a9	0.477524	2.56949e-23		Sh2b1	0.429913	0.000130538		Klf3	1.11107	2.00671e-94
Scpep1	0.697784	3.12008e-195		Zfp667	0.454398	3.55429e-106		Gna13	0.703623	3.26153e-23		Rbm33	0.850579	0.000142889		St3gal6	0.925936	3.08689e-94
Cotl1	0.695899	3.25173e-195		Gm48065	0.408751	6.48909e-106		Sdf2l1	0.417832	3.52572e-23		Oga	0.958626	0.000155239		Atp6v0c	0.99064	1.21732e-93
Raph1	0.956602	1.11696e-194		Ccr1	0.630185	7.78262e-106		Gngt2	0.60164	3.53291e-23		Exoc4	1.19088	0.000155967		Snx10	1.12201	8.97119e-93
1700017B05Rik	0.599615	1.20183e-193		Cux1	0.926499	8.30408e-106		Ptafr	0.682933	3.87174e-23		Kpna1	1.1523	0.000164444		Tbc1d23	1.18846	1.69138e-92
Uhrf2	1.216	1.80821e-193		Slc8b1	0.576879	1.78526e-105		Tmem131l	1.16089	3.93399e-23		Ubr2	0.876592	0.000169905		Synj1	1.06086	4.03273e-92
Atp6v0b	0.720366	8.69848e-193		Zfp703	0.988125	3.30971e-105		Mrps6	0.474726	5.16356e-23		Gna13	1.12125	0.000195013		Riok3	1.07505	1.05901e-91
Irf5	0.508422	1.66035e-192		Rassf3	0.730097	4.36208e-105		Flrt3	1.00231	5.32245e-23		Inpp4b	1.65794	0.000200962		Cap1	0.973485	4.04326e-91
Npc1	0.723922	1.96467e-192		Slfn8	0.48879	4.83815e-105		Hint3	0.331175	6.12415e-23		Cyld	0.836088	0.000207873		Rnasel	0.922227	5.35304e-91
Ptpn18	0.515796	2.26236e-192		Cyfip1	0.904743	9.24316e-105		Tnip2	0.588238	7.54944e-23		Ppm1h	1.14297	0.000230564		Bcl6	0.991887	2.41043e-90
Jag1	0.962659	3.02463e-192		Irf5	0.53359	1.10499e-104		Rest	0.658167	1.30896e-22		Prkd3	0.878138	0.000251628		Osm	1.08964	2.51161e-90
Dock4	1.04608	1.38497e-191		Sh3bgrl	0.836219	1.11712e-104		Vav2	0.356918	1.60212e-22		Trpv2	0.518024	0.000252569		Rffl	1.14046	1.01449e-89
Cyth4	0.391093	1.76326e-191		Milr1	0.285205	1.22144e-104		Acot7	0.366619	1.77027e-22		Dennd3	0.543692	0.000262445		Lrrc8d	1.04865	6.37831e-89
Por	0.743886	4.20288e-191		Sh2b2	0.554303	1.37894e-104		Vps37b	1.02243	1.79359e-22		Phf20l1	0.800576	0.000262922		Hcls1	0.854626	6.47754e-87
Stap1	0.534132	1.83328e-190		Rp2	0.461931	1.53148e-104		Gpd2	0.925578	2.09985e-22		Smad4	0.723873	0.000263893		Zfyve26	0.871368	1.25268e-86
Fpr1	0.57811	2.66555e-190		Vav3	1.01956	3.69403e-104		Sestd1	0.849137	2.22998e-22		Nlk	0.944798	0.000276221		Wipf1	1.25915	1.54474e-86
Rgs1	0.920933	6.32098e-190		Slc49a4	0.999617	2.13407e-103		Arpc3	0.574961	2.5636e-22		Arid1b	0.863423	0.000287941		Csf1	1.75745	2.49186e-86
Cav2	0.662253	5.85653e-189		Gde1	0.758519	2.5538e-103		Lrrc8c	0.619992	2.57481e-22		Rora	2.29148	0.000299399		Cnnm2	1.05054	2.87277e-86
Vav1	0.4375	1.22489e-188		Atp6v1a	0.9704	2.64067e-103		Crlf2	0.338742	2.57776e-22		1810026B05Rik	1.0101	0.000346193		Glipr2	0.917724	8.25453e-86
Pon3	0.577142	2.02989e-188		Lfng	0.356442	6.59539e-103		Ikzf1	0.363602	3.31123e-22		Uhrf2	1.57696	0.000366109		Glrx	1.06174	9.10861e-85
Mapkapk2	0.90026	3.84709e-188		Atp2b1	0.997756	8.8673e-103		Snd1	0.739163	3.64385e-22		Ubald2	0.982602	0.000381815		Ralgapa1	1.58705	2.49117e-84
Gmfg	0.461071	3.67253e-187		Cenpa	0.631249	1.11765e-102		Ptprc	0.650298	5.07713e-22		Rps6ka3	1.06634	0.000428738		Znrf1	1.06248	2.74839e-84
Csf2rb2	0.475917	4.09536e-187		Tank	1.07445	4.61106e-102		Vav3	1.0144	5.53592e-22		AI504432	0.45842	0.000511593		Pnpla7	1.14737	3.8676e-84
Etv6	0.980826	9.56722e-186		Picalm	0.961286	6.59519e-102		Fam110a	0.291068	7.58281e-22		N4bp2l1	0.771294	0.000522254		Mocos	0.762652	8.48734e-84
Fbxl2	0.524345	1.28845e-185		Tfec	0.393815	7.18399e-102		Rbbp8	0.869072	9.43134e-22		Adipor2	1.01987	0.000535816		Lnpep	1.009	3.11979e-83
Fxyd5	0.637147	2.98844e-185		Pkn1	0.405022	1.08521e-101		Bri3bp	0.362319	9.45566e-22		Crbn	0.516368	0.000581136		Rgcc	1.17727	1.05067e-82
Tnf	1.06304	3.11975e-185		Abr	1.08928	1.41343e-101		Appl1	0.867014	1.06133e-21		Rnf138	0.828818	0.000655305		Dmxl2	1.11206	1.40413e-82
Cdc42	0.614066	5.22569e-185		Snx5	0.948697	2.06193e-101		Pik3r6	0.562296	1.11118e-21		Itpkb	1.49226	0.000662042		Slc3a2	0.949562	1.85041e-82
Gpr132	0.502411	6.43624e-183		Akr1a1	0.945369	2.22529e-101		Stk17b	0.689287	1.32193e-21		Snhg15	0.522742	0.000677425		Chp1	1.17994	8.76844e-82
Gpi1	0.768212	7.15768e-183		M6pr	0.727345	2.59842e-101		Fam117b	0.878932	1.69143e-21		Tnfaip8	1.32787	0.000700869		Vav3	0.869525	1.24246e-78
Ppp4r2	0.754702	1.5291e-182		Itm2b	1.15768	7.52391e-101		Pacs2	0.400946	1.80524e-21		Epsti1	0.791628	0.000775922		Nfkbid	0.96347	1.45356e-78
Cyth1	0.804251	2.87734e-182		Clta	0.861517	7.63385e-101		Cep83	0.722608	2.01147e-21		Pspc1	0.78249	0.000832337		Pnrc1	0.861861	1.52399e-78
Fam102b	0.944632	6.1949e-182		Igsf6	0.46429	9.83299e-101		Lcp1	0.61638	2.11273e-21		Cntrl	0.627251	0.000878619		Syne1	1.73296	2.46624e-78
Lmbrd1	0.780393	1.42114e-180		Il10	1.52504	1.35254e-100		Rabgap1l	1.9664	2.51054e-21		Hivep2	1.34459	0.000915855		Tgoln1	0.99093	3.61507e-78
Cgnl1	0.71591	2.58186e-180		Cebpb	0.909809	3.52788e-100		Syk	0.646988	2.87332e-21		Ciapin1	0.704462	0.00101176		Trim30d	0.992533	6.26762e-78
H2-D1	0.653395	5.91225e-180		Lacc1	0.535887	8.24401e-100		H2-T23	0.46872	2.93582e-21		Tex2	1.9648	0.00104869		Rlf	0.911869	6.73652e-78
Akt3	0.727294	1.31927e-179		Pid1	0.706502	1.12835e-99		Dennd3	0.413541	3.33971e-21		Rac2	0.742823	0.00105309		Mthfs	1.07622	1.06687e-77
Notch2	0.706897	9.05904e-179		Ralgps1	0.510128	1.24353e-99		Clec2d	0.812747	3.55491e-21		Gmip	0.691873	0.00110451		Ip6k1	0.964643	1.90833e-77
Rybp	0.822939	1.66603e-178		Bin2	0.261808	4.81377e-99		Nfkbib	0.551234	3.55937e-21		Tnik	1.03008	0.00113799		Adgre5	1.13346	2.33023e-77
Epb41l2	0.817249	2.2736e-178		Bri3	0.827963	5.20871e-99		Ube2j2	0.570921	4.02719e-21		Ip6k1	0.979872	0.00123106		Atp8b4	1.08498	1.30702e-76
Rcbtb2	0.548184	8.14617e-178		Cyp4f18	0.327583	9.47089e-99		Slc35f6	0.322763	4.04917e-21		Prpf18	0.534849	0.00133818		Kdm6b	0.897938	3.43766e-76
Tgfb1	0.615703	3.03078e-177		Pik3ap1	0.411316	1.04894e-98		Nckap1l	0.311169	4.30982e-21		Ern1	1.97552	0.00163717		Cdk17	1.02511	3.81042e-76
Fpr2	0.458662	3.07084e-177		Dgkz	0.710968	1.12853e-98		Rnaset2a	0.566194	4.3791e-21		Ccm2	0.906434	0.00181701		Sbno1	0.97056	5.69497e-76
Ier3	1.28469	4.32026e-177		Slc29a3	0.372516	1.51099e-98		Chp1	0.668576	5.01772e-21		Armc7	0.470725	0.00181709		Ccl4	3.00575	2.48604e-75
C1qa	1.2656	1.87689e-176		Golph3l	0.618526	1.5176e-98		Mcemp1	0.52561	6.03385e-21		Pank2	0.756941	0.00190939		Atp11b	1.27481	1.15548e-74
Nfe2l2	0.735874	2.21474e-176		Rab43	0.620056	1.88594e-98		Anxa11	0.846416	6.13359e-21		St8sia4	1.14622	0.00205116		Gcnt2	1.0344	2.58587e-74
Pld4	0.389083	3.25561e-176		Arpc1b	0.823385	2.20176e-98		Ubald2	0.714011	7.39126e-21		Hdac8	1.01838	0.00208355		Pira2	0.735374	6.58806e-74
Clec4a3	0.389845	7.05295e-176		Tlr2	0.684726	2.96959e-98		Arl4c	0.623833	8.53839e-21		Grk6	0.538143	0.00209366		Ubc	0.631373	1.16765e-73
Fam214b	0.525784	2.40832e-175		Atp6v0b	0.801663	4.57713e-98		Wdfy4	0.418258	1.16613e-20		Nfkb1	1.4168	0.00234934		Rnf11	0.964655	5.41934e-73
Lyn	0.502824	1.15638e-174		Syngr2	0.802122	5.39033e-98		Sh3bp4	0.563228	1.32269e-20		Nipbl	0.7066	0.00244727		Zfp263	0.952608	6.90065e-73
Rftn1	0.662025	1.23287e-174		Rassf4	0.527695	5.6163e-98		Ddt	0.687779	1.55752e-20		Cd37	0.48395	0.00260489		Slc27a4	0.828552	8.90652e-73
Glul	0.870035	1.05606e-172		Slc3a2	0.794206	5.70303e-98		Dgat1	0.51093	1.564e-20		Saraf	0.892681	0.00289886		Tet2	1.02391	9.47331e-73
Bnip3	0.724064	2.63941e-172		AI839979	0.434987	7.06113e-98		Btk	0.287809	2.20369e-20		Esco1	0.915731	0.00312784		Klf7	0.938803	3.56269e-72
Arpc1b	0.675297	5.75397e-172		Pou2f2	0.440768	7.22379e-98		Gpbp1	0.653993	2.35503e-20		Anp32a	1.08853	0.00325492		Tfeb	0.837999	7.43774e-72
Rab20	0.505874	1.99616e-171		Sirt2	0.694724	1.01336e-97		Zfp263	0.476473	2.87561e-20		2210408F21Rik	0.966117	0.00340008		Rabgef1	0.94952	1.7251e-71
Abcc5	0.942445	2.48079e-171		Gm15832	0.41236	1.24194e-97		Ubxn4	0.741995	3.05199e-20		Elmsan1	1.09482	0.00357988		Cflar	0.906215	3.63983e-71
Irf8	0.398028	6.62332e-171		Plaur	0.676208	1.65811e-97		Kdm6b	0.860432	3.25795e-20		Pde6d	0.610449	0.00358695		Wbp1l	0.997051	7.34141e-70
Stab1	0.570012	8.89204e-171		Txnrd1	1.05396	2.60751e-97		Il1b	0.993831	3.83452e-20		Rras2	1.0966	0.00387673		Rybp	1.19952	1.20938e-69
Gpr35	0.49426	1.7106e-170		Blvra	0.390059	4.01367e-97		Ifngr2	0.478306	3.83513e-20		Gch1	1.10889	0.00404738		Tax1bp1	0.684186	2.12402e-69
Ncf1	0.468164	2.70848e-170		Gab1	1.21434	6.98945e-97		Tank	1.05119	4.04613e-20		Dgkd	0.659119	0.00424946		Tnrc18	1.00054	1.52732e-68
Cd300lb	0.4039	2.97802e-170		Elmo1	0.813768	7.57765e-97		Lrrc8d	0.788275	4.11887e-20		Ccdc82	0.694873	0.00429284		Ddx5	0.570062	1.5746e-68
Atp6v1e1	0.688381	4.10865e-170		Nfkbid	0.621637	1.16433e-96		Ifngr1	1.08238	4.78297e-20		Ifngr1	1.27366	0.00440187		N4bp2	0.898726	2.49783e-68
Pcyt1a	0.763487	4.61597e-170		Dram2	0.645997	1.33486e-96		Bmp2k	1.49207	8.28673e-20		Ddx3y	0.853823	0.0046954		Dedd2	0.836749	2.60466e-68
Itpkb	0.909433	1.20661e-168		Mafb	1.33471	1.8028e-96		Stat2	0.498061	9.81656e-20		Kin	0.304609	0.00512662		Braf	1.20866	3.89707e-68
Gclm	0.976091	1.77191e-168		Cflar	0.959975	3.59319e-96		Edem1	0.633361	9.89057e-20		Hdac4	0.785556	0.00561029		Map3k14	0.800777	4.52466e-68
Ell2	0.920717	3.1015e-168		Pde3b	0.67717	8.75014e-96		Ddx6	0.701573	1.26293e-19		Fam49b	1.14447	0.00573913		Map3k5	1.1296	1.31884e-67
Galc	0.475351	4.52683e-168		Slc16a10	0.994733	1.56445e-95		Wdr37	0.407727	1.3569e-19		Gm47283	0.81774	0.00582412		Pxn	0.868789	1.57856e-67
Wfdc17	1.41664	9.51564e-168		Uap1l1	0.373081	2.70536e-95		Gyg	0.323149	1.35866e-19		Hmces	0.663864	0.00654675		Slc12a6	1.06085	9.95145e-67
Mafb	1.13063	1.18413e-167		Specc1	0.701625	7.80677e-95		Ric1	0.893656	1.36621e-19		Asxl1	0.820422	0.00737466		Tra2a	1.07743	2.0316e-66
Ecm1	0.689797	1.98458e-167		Naip2	0.407295	1.16812e-94		Uck2	0.712362	1.37702e-19		Ube2h	0.770519	0.00743018		AA467197	0.755959	2.25471e-66
Coro1a	0.431943	2.01586e-167		Serinc3	1.00299	2.35296e-94		Aim2	0.380031	1.45944e-19		Herc1	1.10688	0.00798664		Il18	0.828668	5.4141e-66
Lpin2	0.876375	7.30546e-167		Dazap2	0.791705	2.54722e-94		Snap23	0.597179	1.50585e-19		Clk1	0.971531	0.00846528		Ube2b	0.737347	1.12521e-65
Nfkbie	0.499491	1.32301e-166		Sh3pxd2b	0.78546	2.72501e-94		Plek	0.451301	1.79747e-19		Tnip1	0.669299	0.00939692		Hmgb2	0.975466	1.1665e-65
Lasp1	0.590617	2.87414e-166		Ap1s2	0.501198	7.4289e-94		Elmo1	0.793332	2.01592e-19		Ccnd2	0.703105	0.00941018		Hnrnph2	0.871755	1.66625e-65
Cln8	0.48718	1.26317e-165		Mir142hg	0.357779	1.05838e-93		Cep170	0.499929	2.09289e-19		Prkcb	0.812841	0.00943633		Ap3s1	0.963689	2.00337e-65
Pld1	0.752831	1.62256e-165		Pcyt1a	0.79062	1.18382e-93		Chd2	0.788547	2.10089e-19		Smc4	0.809179	0.00959372		Iqgap1	0.551452	3.84807e-65
Slc8a1	0.953538	2.35289e-165		Jdp2	0.845108	2.82551e-93		Vgll4	0.83456	2.50604e-19		Apc	0.919019	0.0103933		Gpsm3	0.744532	5.45834e-65
Mroh1	0.525643	5.31421e-165		C9orf72	0.565702	2.95291e-93		D8Ertd738e	0.558554	2.85608e-19		Gimap6	0.840149	0.0104602		Pkm	0.603314	7.5156e-65
Atp6v1b2	0.795954	1.12437e-164		Lrrc25	0.298578	4.22578e-93		Arap2	1.39661	3.62413e-19		Nek7	0.936407	0.010637		Samhd1	1.26997	1.4898e-64
App	0.660097	1.25747e-164		Nuak2	0.488852	4.4139e-93		Edem2	0.503405	4.0269e-19		Gabpb1	0.977754	0.0120741		Plgrkt	1.03811	1.62182e-64
Pde8a	0.691675	4.38649e-164		Vps18	0.387734	7.09272e-93		Pira2	0.353413	4.62526e-19		March3	1.27626	0.0121393		Arih2	0.872198	2.42424e-64
Ehd1	0.689032	6.05117e-164		Cers2	0.386251	1.97374e-92		Plekha2	0.437259	4.68826e-19		Samd9l	0.407741	0.012472		Atp7a	1.10817	2.52506e-64
Rab8b	0.682926	6.91287e-164		Impact	0.850183	2.56405e-92		Plcl2	1.00555	4.87119e-19		Fbxo34	1.00884	0.0126663		Agtpbp1	1.03562	3.30189e-64
Vsir	0.497124	1.25461e-162		Rnf157	0.596192	2.56977e-92		Nfkb2	0.506225	4.94319e-19		Tacc1	0.771725	0.0138114		Ddit3	0.81009	8.48374e-64
Tbk1	0.68814	1.3722e-162		Sh3kbp1	0.944479	3.85267e-92		Casp6	0.291798	5.48221e-19		Wdr33	0.741685	0.0141262		Cdk2ap2	1.21112	9.3973e-64
Capg	0.697266	1.9766e-162		Slc6a6	0.732662	4.9528e-92		Rab11fip1	0.524891	5.60385e-19		Galnt2	0.851068	0.0142094		Ell2	0.807704	2.2624e-63
Aldoa	0.689424	3.15472e-162		Mdm2	0.918236	1.41927e-91		Uty	0.772813	5.74542e-19		Traf3	1.35	0.0142167		Sgpl1	0.815702	4.3666e-63
Folr2	0.439758	6.72653e-162		Mfsd12	0.343237	7.1387e-91		Dnajb2	0.294993	6.20114e-19		Nabp1	0.975323	0.0143662		Usp32	0.954597	5.16795e-63
Map4k3	0.867953	6.86638e-162		5031439G07Rik	0.620714	9.93883e-91		Acadm	0.851588	6.23556e-19		Tnks2	0.950923	0.0145343		Smim3	0.957832	9.65563e-63
Grik3	0.396392	2.66521e-161		Lcorl	0.954419	2.55018e-90		Trim11	0.326558	6.57579e-19		Zfp62	0.771578	0.0146093		Atp6v1e1	0.980508	1.59841e-62
Metrnl	0.688673	4.99481e-161		Uvrag	0.793029	3.77867e-90		Rasa2	0.882364	7.09388e-19		Dnaja1	1.11413	0.0152011		Tm6sf1	0.873498	3.36254e-62
Mcub	0.597858	9.34206e-161		Arhgap45	0.305575	5.20461e-90		Polb	0.707697	8.55164e-19		Gm37240	0.885318	0.0154307		Smim14	1.11367	3.63968e-62
Prdx1	1.45544	1.07075e-160		Mitf	0.970366	6.45875e-90		Gng10	0.651491	8.8713e-19		Ppm1b	0.869503	0.0160757		Slc43a2	1.1049	6.33307e-62
Sh3bp2	0.55676	1.25839e-160		Gpsm3	0.381352	7.76422e-90		Neurl3	0.396229	9.11472e-19		Clint1	0.97624	0.0171079		Msl2	0.922935	1.65646e-61
Cers2	0.487004	1.96085e-160		Gdf15	1.012	8.68519e-90		Olfm1	0.309626	1.11802e-18		Stag1	0.860347	0.0175651		Zyx	0.858707	1.29964e-60
Zc3h12c	0.877427	2.26432e-160		Gsdmd	0.311155	8.84572e-90		Fgr	0.323368	1.19946e-18		Maf	1.19271	0.0178078		Arrdc3	0.941558	2.62254e-60
Pgd	0.633913	1.61294e-159		Cacna1d	1.02839	4.54352e-89		Nub1	0.460648	1.21979e-18		Itpr1	1.1697	0.0181534		Atg2a	0.946392	5.29916e-60
Gapdh	0.804198	4.43231e-159		Adam9	0.608382	4.79611e-89		Ahr	0.99182	1.27477e-18		Rapgef2	1.16465	0.0198719		Cxcl3	0.976354	5.36138e-60
Gla	0.502912	7.92949e-159		Ifngr2	0.655431	6.71281e-89		Wasf2	0.645135	1.33815e-18		Crebbp	0.77473	0.0199046		Pitpna	0.792819	1.60367e-59
Airn	1.07474	1.30578e-158		Ccrl2	0.604849	8.0307e-89		Cdkn1b	0.416791	1.75092e-18		Zc3h13	1.12845	0.0202797		1700017B05Rik	0.935329	2.15114e-59
Rab11fip1	0.662381	4.40745e-158		Tpst2	0.527155	9.85818e-89		Pan3	0.643097	2.0731e-18		Kat2b	0.721555	0.0203571		Kmt2e	0.720777	2.20379e-59
Slc6a6	0.622859	1.19216e-157		Cdc42	0.680708	1.26539e-88		Slc5a3	0.366009	2.63428e-18		Stap1	1.32034	0.0204517		Skap2	0.929377	9.88612e-59
Skap2	0.700528	1.90035e-157		Blnk	0.844045	1.6376e-88		Fem1c	0.850761	3.0372e-18		Dyrk1a	0.749842	0.0210534		Taldo1	1.07045	1.82172e-58
Trf	0.928134	8.84362e-157		Zbp1	0.434915	1.66149e-88		Helz2	0.564925	3.09633e-18		Bbs9	0.685842	0.0216233		Laptm5	0.502288	4.34904e-58
Dleu2	1.0284	1.05228e-155		Sft2d1	0.529011	2.91384e-88		AU020206	0.366084	3.49481e-18		Ppm1g	0.879667	0.022126		Runx2	1.02189	4.78549e-57
Ero1l	0.679369	6.09185e-155		Ncf1	0.342972	4.8055e-88		Specc1	1.11675	4.94097e-18		Crlf3	0.845242	0.0224069		Sntb2	0.884334	4.88642e-57
Adora2b	0.577756	7.16833e-155		Rab20	0.508236	6.19235e-88		Fbxo11	0.841987	5.3628e-18		Spata13	0.899369	0.0228721		Jmjd1c	0.745734	2.68316e-56
Gsap	0.460785	1.34927e-154		Gnaq	0.796772	1.97862e-87		Id2	1.02086	6.02651e-18		Epb41	1.5694	0.0230081		Spidr	0.968308	4.59159e-56
Clcn7	0.497432	4.9273e-154		Calm1	0.921918	2.72407e-87		Tacc1	0.517281	6.52604e-18		Swap70	1.04343	0.0234846		Gpbp1	0.788661	7.24178e-56
Pitpna	0.635737	5.13022e-154		Itpkb	0.969997	6.09887e-87		Zfand6	0.704661	9.27432e-18		Stxbp5	0.679644	0.0238623		Junb	0.709023	7.7977e-56
Hk3	0.295211	5.24893e-154		Npc1	0.730609	1.12978e-86		Smarce1	0.456097	9.71345e-18		Sp100	0.795662	0.0242517		Tgm2	0.922074	1.30401e-55
Rgs10	0.508106	4.03333e-153		Ero1lb	0.384896	1.27337e-86		Ifitm2	1.15386	1.00569e-17		Stk24	0.935926	0.0263157		Inpp4a	0.845848	1.71267e-55
Adam17	0.749985	5.49206e-153		Pitpnc1	1.47354	1.29355e-86		Socs2	1.15161	1.07942e-17		Ssbp3	0.825609	0.0284361		Gng5	0.61502	1.72684e-55
Gm13986	0.606639	1.03137e-151		Snx29	0.897592	1.60578e-86		Gpat4	0.326132	1.40233e-17		Cd48	0.410136	0.0287873		Tmem140	0.851647	2.71012e-55
Sh3pxd2b	0.662879	2.80673e-151		Etv3	0.69382	2.55831e-86		Tmem176a	0.632201	1.62314e-17		Ctnnbl1	0.441652	0.0296755		Prkcb	1.20465	3.85321e-55
Irf2bp2	0.733711	8.60808e-151		Iqgap2	0.620628	2.62899e-86		Pphln1	0.317414	1.64388e-17		Cd52	1.00866	0.030885		Ppp1r10	0.733742	5.03866e-55
Srxn1	0.759843	1.13235e-150		Fxyd5	0.867042	4.22257e-86		Picalm	0.727009	1.6655e-17		Usp34	0.625099	0.0313578		Arrdc4	0.928557	6.7236e-54
Akr1a1	0.658249	2.81516e-150		Gnai2	0.734741	5.69866e-86		Bin1	0.685088	1.82889e-17		Abhd2	1.01407	0.0314692		Hspbap1	0.819896	1.15941e-53
Flrt2	0.874973	4.452e-150		Pde7b	1.04645	6.47231e-86		Pkn1	0.287123	2.01344e-17		Spsb1	0.708563	0.0327071		Gadd45b	1.52863	1.20782e-53
Lrp12	0.784222	8.83753e-150		Shisa5	0.666163	7.68715e-86		Gm16599	0.358696	2.01632e-17		Dgkh	0.911845	0.0328646		Tnfaip2	1.13272	1.72822e-53
Ccdc50	0.685751	1.52172e-149		Tut4	0.745059	8.11365e-86		Dgkd	0.537264	2.10374e-17		Amz2	0.458328	0.0355718		Msn	0.661825	2.01732e-53
Apbb1ip	0.498931	5.48458e-149		Sh3bgrl3	0.867905	1.19162e-85		Stat1	1.27879	2.51842e-17		Crtc3	1.00165	0.0372101		Actg1	0.5248	6.24391e-53
Slc12a6	0.658043	1.189e-148		Dgkd	0.67183	2.20306e-85		Lnx2	0.642711	3.54132e-17		Irf2	0.64611	0.0375694		Clk1	0.649602	8.50554e-53
Havcr2	0.339694	1.20569e-148		Pitpna	0.730913	2.53049e-85		Gcnt2	0.901579	3.73054e-17		Lnpep	0.535274	0.0377516		Tiparp	1.02289	1.35341e-52
Marcksl1	0.737	2.29595e-148		Atp8b4	0.525496	3.13607e-85		Supt4a	0.462941	3.87359e-17		Braf	1.02742	0.0394054		Rassf3	1.05847	2.0872e-52
Mmp19	0.858846	1.54807e-147		Sh3bp2	0.451076	3.16435e-85		Nfil3	0.547432	3.88367e-17		Gpbp1l1	0.63716	0.0427404		Slc38a1	0.938403	4.95882e-52
Rab43	0.595823	2.06577e-147		Amdhd2	0.38517	3.97788e-85		Stat6	0.381704	4.06341e-17		Pkn1	0.474426	0.0430078		Sipa1l1	1.24635	8.10343e-52
Ago3	0.843887	2.2798e-147		Irf2bp2	0.826726	9.35455e-85		Srsf7	0.54413	4.3921e-17		Adcy7	0.445564	0.0432921		Zswim4	0.77724	1.45269e-51
Dram1	0.59055	4.04933e-147		Dapk1	0.813936	2.97115e-84		Pim1	0.527338	5.1492e-17		Laptm5	0.601332	0.0471012		Arpc1b	0.598351	4.18134e-51
Gbe1	0.838295	1.13946e-146		Tcn2	0.502401	4.59457e-84		Sel1l	0.614888	6.06311e-17		Stat5a	0.933915	0.0491339		Atp2b1	0.769483	1.90549e-50
Dhrs3	0.649473	1.04623e-145		Man1c1	0.568328	6.89852e-84		Cnn2	0.568447	6.54474e-17						Sec14l1	0.854915	2.23899e-50
Fbxo32	0.876613	2.62008e-144		Plcl2	0.583895	7.8143e-84		Crybg1	0.532913	6.54957e-17						Ssu72	0.780268	3.50823e-50
Vim	0.6942	5.58183e-144		Tnfrsf1b	0.977945	8.77215e-84		Ccser2	0.773619	6.59055e-17						Ankrd12	1.06976	4.42013e-50
Crlf3	0.592573	7.25511e-144		Grk2	0.443348	1.10813e-83		Psme2	0.772821	6.72006e-17						Fyb	1.14256	7.5138e-50
Ccl3	0.996403	1.56778e-143		Cd37	0.35797	1.2029e-83		Aebp2	0.833236	6.99066e-17						Ifnar1	0.83039	1.64513e-49
Rab32	0.4821	4.30803e-143		Plekhm2	0.708465	1.32926e-83		Eya3	0.445661	7.44596e-17						Mctp1	0.536142	2.49902e-49
Arhgdib	0.597483	6.90657e-143		Lasp1	0.593672	1.51335e-83		Rhoq	0.900276	9.29344e-17						Gpr35	0.753904	3.28805e-49
Gusb	0.490698	1.34205e-142		Auh	0.555022	1.54103e-83		Klhl5	0.371411	9.42251e-17						Ago2	0.79478	5.68418e-49
Cmtm7	0.435241	3.00725e-142		Dnajb14	0.49111	1.78923e-83		Chd7	0.669974	9.61802e-17						Hgsnat	1.33981	1.00968e-48
Cstb	0.67127	1.57227e-141		Ctsh	0.687157	2.11846e-83		Ssh1	0.714031	1.05306e-16						Plbd1	1.09298	3.27419e-48
Vps18	0.407605	4.25383e-141		Cmtm7	0.462224	2.40971e-83		Pfdn5	0.496905	1.10202e-16						Zdhhc18	0.993403	5.31795e-48
Cpd	0.755954	1.12715e-140		B4galt6	0.495198	5.33423e-83		Isg15	0.547725	1.13774e-16						Sipa1l2	0.872222	6.67743e-48
Slc11a2	0.59533	2.19726e-140		Atp6ap2	0.63131	9.20996e-83		Gpatch2l	0.33696	1.37549e-16						Rab32	0.697847	1.31386e-47
Cd300a	0.29685	7.34974e-140		Flcn	0.352817	1.40112e-82		Rbm5	0.570279	1.45219e-16						Map2k3	0.734414	2.62666e-47
Inpp5d	0.489579	1.08517e-139		Dhrs3	0.71397	1.89704e-82		Fnbp1l	0.90908	2.00704e-16						Gm15832	0.642851	5.10879e-47
Cux1	0.597408	1.09996e-139		Cipc	0.505883	2.4123e-82		Camta2	0.307119	2.12242e-16						Rhoa	0.559764	7.06486e-47
Gngt2	0.512439	1.55216e-139		Cd93	0.69374	2.66045e-82		Emd	0.398983	2.33372e-16						Rac1	0.616171	9.43525e-47
Fbxl5	0.708252	2.30247e-139		Hexb	0.5601	5.40572e-82		Fam174a	0.415328	2.4019e-16						Stat6	0.766789	1.34489e-46
Pim1	0.635542	3.31515e-139		Napsa	0.384992	6.35029e-82		Fam107b	0.507112	3.19949e-16						Il10ra	0.604559	1.77152e-46
Hpcal1	0.594773	5.00668e-139		Prcp	0.546925	1.29545e-81		Adgrg6	1.26391	3.74183e-16						Lcor	1.17738	4.89331e-46
Ptgs2	2.33662	1.83914e-138		Hdac5	0.562935	1.46589e-81		Fancc	0.464058	3.8093e-16						Sf3b1	0.630151	6.43509e-46
Stx3	0.59603	3.43208e-138		Pira2	0.34108	2.22705e-81		4930523C07Rik	0.562241	4.03943e-16						Rnf125	0.679827	1.07289e-45
C9orf72	0.52033	1.01547e-137		Stxbp3	0.832122	2.5748e-81		Gmip	0.302613	4.41624e-16						Ezr	0.891974	6.13262e-45
Uap1l1	0.345703	1.4875e-137		Raph1	0.923437	7.69823e-81		N4bp2l1	0.404076	5.68056e-16						Pstpip1	0.61331	1.02738e-44
Plaur	0.411398	1.73521e-137		Adam8	0.702577	9.34288e-81		Pfn1	0.649642	6.50308e-16						Soat1	0.820794	1.04779e-44
Cerk	0.652023	2.92879e-137		Eps8	1.02491	1.29217e-80		Hax1	0.309247	6.51436e-16						Ninj1	0.681869	1.42704e-44
Picalm	0.616446	3.98185e-137		Atg4c	0.409494	1.4896e-80		Mtmr6	0.386433	6.92256e-16						Nek6	0.709052	2.7724e-44
Hsd17b11	0.403869	4.11753e-137		Stard9	0.430502	4.86796e-80		Ctnna1	0.974817	7.46573e-16						Mpp7	1.459	3.378e-44
Anxa3	0.506005	9.34275e-137		Rap1b	0.725467	7.00045e-80		Rp2	0.296345	8.94663e-16						Oga	0.670532	5.27135e-44
Furin	0.695437	1.48918e-136		Ednrb	1.09882	7.09696e-80		Fbxl20	0.62774	1.07932e-15						Atp6v0a1	0.907558	5.44705e-44
Mospd2	0.58594	1.56967e-136		Castor2	0.472359	7.27551e-80		Cfl1	0.58716	1.09047e-15						Tsc22d3	0.943534	5.00527e-43
Cav1	0.96117	1.92064e-136		Dock8	0.387165	2.18313e-79		Atp8a1	0.47805	1.50094e-15						Tgif1	0.812691	5.01901e-43
Sfmbt1	0.810651	2.0076e-136		Abi3	0.450801	6.15463e-79		Cd47	0.728865	1.97991e-15						Abtb2	0.851795	1.10672e-42
Tmem87b	0.672117	2.0397e-136		Cst3	0.7109	8.58779e-79		Rbm3	0.597877	2.12834e-15						Vps13d	0.814282	1.75806e-42
Celf1	0.635726	2.26129e-136		Slc7a7	0.344185	3.16739e-78		Dyrk1a	0.589879	2.13516e-15						Tmem164	1.08035	7.76012e-42
Ms4a6b	0.345438	5.6095e-136		Tnip3	0.930044	4.77475e-78		Tnfrsf11a	0.666826	2.3191e-15						Ptpre	0.850665	9.01023e-42
Fblim1	0.479564	1.0119e-135		March1	0.254935	5.00041e-78		R3hdm2	0.573973	2.67927e-15						Picalm	0.815478	9.81503e-42
Ptges	1.3254	1.14301e-135		Lactb	0.463753	9.00442e-78		Lrrc4	0.423456	2.69186e-15						Hip1	0.897368	9.84157e-42
Fam20a	0.500365	1.89342e-135		Edil3	1.04345	1.13096e-77		Herpud1	0.543779	3.04487e-15						Cdkn1a	0.725102	2.98626e-41
Cxcl16	0.677948	3.66534e-135		Arhgap26	0.884056	1.36716e-77		March7	0.590826	3.20026e-15						Blcap	0.740482	3.30942e-41
2310022A10Rik	0.442301	1.03321e-134		Ppp4r2	0.797217	1.42321e-77		Tmem160	0.28341	4.10919e-15						Mtmr3	0.777115	3.6061e-41
Ctps2	0.447842	1.11506e-134		Ciao2a	0.356452	1.50818e-77		Ahcyl2	0.631373	4.54477e-15						Cpne2	0.899917	6.28096e-41
Flrt3	0.865599	1.29519e-134		Fam49a	0.4513	1.66196e-77		Def6	0.328527	4.6108e-15						Son	0.601228	7.44971e-41
Gdpd1	0.361396	3.66781e-134		Psmb10	0.37517	1.96714e-77		Tnks	0.693176	4.82737e-15						Dnm2	0.83212	7.69167e-41
Epsti1	0.443052	5.51291e-134		Lrrc8d	0.772166	2.24265e-77		Cnpy3	0.267305	5.3002e-15						Vsir	0.740802	9.25745e-41
H2-K1	0.588211	6.30848e-134		Atp6v0d1	0.644588	3.64957e-77		Ap1s2	0.286629	5.3563e-15						Olr1	0.925485	1.50329e-40
Cd83	0.539081	1.73812e-133		Epb41	0.875095	1.39639e-76		Sgk3	0.623474	5.55617e-15						Ptpn12	0.744233	1.92837e-40
Rreb1	0.926027	2.52323e-133		Aldh3b1	0.259135	1.65902e-76		Nav1	0.821131	5.62459e-15						Selenok	0.677989	2.46148e-40
Gm46224	0.368153	1.31028e-132		Ano6	0.965726	2.13651e-76		Nubp1	0.26519	5.82226e-15						Rap1b	0.513018	1.09e-39
Pkm	0.545922	5.78074e-132		Nfe2l2	0.811382	5.65539e-76		Tspo	0.794743	6.65099e-15						Klf6	0.656675	1.41245e-39
Pip5k1c	0.463444	3.09488e-131		Oasl2	0.430868	5.75574e-76		Mxi1	0.596554	7.26058e-15						Sde2	0.752383	1.11959e-38
Acsl4	0.680257	1.02876e-130		Litaf	0.631368	5.93038e-76		Skap2	0.562288	8.73279e-15						Nktr	0.873886	2.08425e-38
Pltp	0.639587	1.83562e-130		Mroh1	0.397104	7.54135e-76		Ubac2	0.461886	8.79271e-15						Esd	0.860995	2.92287e-38
Il2rg	0.421064	1.06147e-129		Srxn1	0.772821	1.08644e-75		Nsf	0.646785	9.08398e-15						Abr	0.452277	3.12436e-38
Prdx6	0.89378	1.37749e-129		Btg1	0.934754	1.87153e-75		Slc25a51	0.425933	1.06773e-14						St3gal4	1.06056	7.5053e-38
Aprt	0.632218	2.11019e-129		Snx30	0.524247	2.10207e-75		Tjap1	0.309615	1.13263e-14						Dhx40	1.00375	8.37603e-38
Frrs1	0.549558	5.76914e-129		Arl8a	0.49509	2.55406e-75		Man2b1	0.392484	1.21912e-14						Arpc2	0.480624	2.63511e-37
Dram2	0.532414	1.04885e-128		Fam129b	0.826817	2.74487e-75		Znfx1	0.347772	1.45619e-14						Vamp4	0.759682	3.21214e-37
Hnrnpll	0.638501	9.91052e-128		Nlrc4	0.440148	2.87611e-75		Zup1	0.482031	1.48967e-14						Serinc3	0.557501	3.78466e-37
Stxbp3	0.670164	1.97749e-127		Psen2	0.370058	3.16038e-75		Ttyh3	0.326811	1.65937e-14						Txnrd1	0.961001	5.10028e-37
Cltc	0.547955	3.88274e-127		Slc23a2	0.590381	3.2601e-75		Slc3a2	0.566031	1.66938e-14						Atp6v0d1	0.686107	5.92033e-37
Dtnbp1	0.700604	3.97472e-127		Sirpb1c	0.35423	4.33215e-75		Phf12	0.389997	1.77324e-14						Gripap1	0.77147	6.0013e-37
Dot1l	0.673764	4.64303e-127		Pstpip2	0.924545	4.83394e-75		Ppp1r10	0.284295	1.92864e-14						Dock5	0.914615	6.2054e-37
Man2a1	0.724961	2.1158e-126		Rybp	0.779938	8.9223e-75		Vasp	0.447664	2.46629e-14						Gnaq	0.760681	5.62686e-36
Fcgr4	0.292113	3.03851e-126		Pepd	0.509612	1.29073e-74		Atad2b	0.489118	2.52838e-14						Uvrag	0.858847	6.20543e-36
Prkcd	0.538845	4.78549e-126		Nrp1	0.688737	2.46749e-74		Jarid2	0.873486	2.64731e-14						Hilpda	1.10348	7.0772e-36
Maml3	1.07573	1.08173e-125		Fcgrt	0.983317	2.91611e-74		Mbtd1	0.600256	3.2574e-14						Brd4	0.604599	7.59435e-36
Katnbl1	0.729409	1.19623e-125		Nfil3	0.599211	3.48682e-74		Lats2	0.448645	4.3964e-14						Erbin	0.631749	8.64713e-36
Pkn1	0.31937	2.24341e-125		Ntpcr	0.311509	4.30061e-74		Stx12	0.551793	5.02022e-14						Anks1	0.778163	1.26796e-35
Rragc	0.506197	1.95212e-124		Glipr1	0.374515	6.07768e-74		Birc3	0.682808	5.10869e-14						Ubald2	0.779528	1.90724e-35
Arrb2	0.369388	2.06477e-124		Anxa5	0.733034	6.29246e-74		Wdr91	0.304102	5.21414e-14						Ubb	0.490227	4.19944e-35
Hcst	0.251924	3.13861e-124		Fyn	0.879626	1.78268e-73		Ndufa6	0.526858	5.66265e-14						Iqgap2	1.03133	5.04455e-35
Ptpn6	0.307409	3.43369e-124		A930007I19Rik	0.394195	3.04041e-73		Srrm1	0.460792	5.7533e-14						Dennd1b	0.975046	5.47055e-35
Capza2	0.566178	5.67046e-124		Nr4a2	0.78001	3.29872e-73		Ccr2	0.720062	5.78754e-14						Arpc5	0.510871	5.47809e-35
Pde3b	0.368612	1.71846e-123		Lin54	0.675768	4.46315e-73		Hsf2	0.666465	6.26185e-14						Nampt	1.20652	6.7881e-35
Crybg3	0.704904	4.20439e-123		Edem1	0.595753	6.33342e-73		Vopp1	0.41879	6.67467e-14						Fam13b	0.765245	1.48362e-34
Arhgdia	0.547312	4.33064e-123		Gpd2	0.711708	1.26129e-72		Ppfibp2	0.578167	8.51245e-14						Rb1cc1	0.714262	1.85797e-34
Camkk2	0.42086	6.49095e-123		Slc38a6	0.634413	1.6802e-72		Hmgcl	0.334244	8.62821e-14						Bcl3	0.763011	6.94158e-34
Lrrfip2	0.568751	8.60508e-123		Odc1	1.30802	1.99165e-72		Sri	0.496686	1.3986e-13						Hmgcl	0.674385	8.03293e-34
Got1	0.529704	3.00696e-122		Plpbp	0.449469	2.05339e-72		Alox5ap	0.491972	1.40004e-13						Adprh	0.621572	9.21729e-34
Atf1	0.582233	5.41802e-122		H2-M3	0.271322	2.59421e-72		Plekha1	0.565964	1.69742e-13						Ppp2r5a	0.927285	1.02195e-33
Nhlrc3	0.323317	2.48455e-121		Tent2	0.615393	3.68621e-72		Ckb	0.515349	1.75212e-13						Susd6	0.597323	4.71637e-33
Mindy1	0.502005	1.27523e-120		Snx9	0.920695	3.69311e-72		Wrn	0.35393	1.76403e-13						Tspan13	0.667176	7.2128e-33
Klhl24	0.561346	2.22556e-120		Rhog	0.508778	5.91978e-72		Trim25	0.405172	1.939e-13						Cks2	0.920027	9.55347e-33
Runx1	0.457708	6.17721e-120		Ppt1	0.439999	7.34799e-72		Cttnbp2nl	0.494281	2.18434e-13						Zfp292	0.891925	1.86049e-32
Pcgf5	0.767346	1.09006e-119		Ifi211	0.729173	9.77935e-72		Zfp62	0.361641	2.21832e-13						Ptk2b	1.04153	1.90846e-32
Cep170	0.470447	1.87584e-119		Fndc3a	0.750636	1.31515e-71		Tap1	0.351273	2.23159e-13						Ncoa3	1.01823	2.10824e-32
Birc3	0.59772	8.71209e-119		Ctsd	1.20737	1.97626e-71		Heatr5a	0.516131	2.29105e-13						Rsrp1	0.499867	6.3827e-32
Atp6ap1	0.531245	9.58677e-119		Necap2	0.470881	2.59154e-71		Rnf114	0.303887	2.43814e-13						Zhx2	0.775481	7.41816e-32
Tes	0.764438	4.84098e-118		Clcn7	0.363879	2.95168e-71		Prkcd	0.603634	2.51172e-13						Crem	0.782045	7.89665e-32
Ets2	0.555959	1.8347e-117		Tln1	0.569989	4.10129e-71		Kpna4	0.542117	2.89155e-13						Pde4b	0.799484	7.92823e-32
Iqsec1	0.283989	3.56789e-117		Clec4d	0.63595	5.10602e-71		Rps11	0.604076	3.35021e-13						Rsrc2	0.592909	1.13401e-31
Cd302	0.421651	4.47448e-117		Limd2	0.265563	5.76043e-71		Hnrnpll	0.872516	3.40372e-13						Heca	0.715078	1.19309e-31
Ppbp	2.00696	6.9455e-117		Cd300lb	0.361231	9.86108e-71		M6pr	0.450547	3.57778e-13						Hpcal1	0.798123	1.21451e-31
AA467197	0.819167	7.69009e-117		Entpd7	0.478949	1.03519e-70		Stk24	0.586963	3.67162e-13						Prkcd	0.671991	1.27536e-31
Ifi203	0.647681	1.81832e-116		Ehd1	0.642667	1.2876e-70		Ccser1	0.733033	4.12893e-13						Trps1	0.636842	1.88067e-31
Ccrl2	0.428573	3.42472e-116		Fgl2	0.590689	1.43596e-70		Arpc5	0.435517	4.35101e-13						Arhgdib	0.655904	2.17979e-31
Zdhhc18	0.494323	3.86344e-116		Mef2d	0.585107	2.20325e-70		Mthfd2	0.344526	4.5253e-13						Dcaf12	0.798124	2.23803e-31
Lncpint	0.714431	1.30032e-115		Vegfa	0.996311	6.48183e-70		Parp8	0.955644	5.34826e-13						Stambpl1	0.803786	3.56063e-31
Taok3	0.514588	4.79892e-115		Pld3	0.525772	7.05412e-70		Arhgap18	0.667155	5.84802e-13						Irf2	0.668369	3.73048e-31
Tom1	0.592813	7.6923e-115		Bst1	0.383721	7.15829e-70		Dleu2	0.959175	6.01109e-13						Aff4	0.661498	4.35563e-31
Shisa5	0.536301	8.73153e-115		Arpc5	0.59639	7.78888e-70		Tob2	0.484926	6.48232e-13						Emd	0.734873	5.36148e-31
Zfand3	0.578344	9.36364e-115		Hnrnpll	0.714413	9.56879e-70		Fxyd5	0.757455	9.02319e-13						Fam76a	0.72109	7.06342e-31
Ralgds	0.541422	1.15178e-114		Arhgap25	0.333512	1.2211e-69		Cd300a	0.580966	1.11206e-12						Tlr2	0.627498	8.73733e-31
Ifi30	0.420569	2.18819e-114		Atp6v1d	0.579289	1.68666e-69		Scaper	0.477395	1.3128e-12						Fbxo11	0.684117	1.02909e-30
Ednrb	0.540371	2.39102e-114		St6galnac6	0.347574	2.56449e-69		Ube2f	0.485509	1.35047e-12						Cdkn1b	0.790004	1.12485e-30
Rufy3	0.681859	3.47156e-114		Atp6ap1	0.517664	3.76643e-69		Necap2	0.336929	1.37854e-12						Txn1	0.643671	1.16615e-30
Adam9	0.515199	6.47218e-114		Arhgap22	0.486908	4.81824e-69		Rasa4	0.321913	1.63542e-12						Eea1	0.968229	1.27995e-30
Sema4d	0.515576	7.02769e-114		Pim1	0.670067	4.96966e-69		Ptpn18	0.263429	1.74322e-12						Stk40	0.614906	2.85641e-30
Tnfaip8	0.631542	1.02594e-113		Isy1	0.612386	5.37769e-69		1810026B05Rik	0.315903	1.77953e-12						Prdx6	0.509828	3.81125e-30
2210408F21Rik	0.489427	1.13804e-113		Nrp2	0.709999	5.83149e-69		Rab21	0.519434	1.93726e-12						Nadk	0.813229	4.64208e-30
Tmem164	0.542873	1.44331e-113		Cep170	0.504972	6.96286e-69		Rbm39	0.482685	2.1808e-12						Ifnar2	0.74952	6.33701e-30
Tent2	0.545663	3.06139e-113		Vamp8	0.57025	8.64871e-69		Atxn7l1	0.678045	2.25453e-12						Nbeal1	0.772821	1.0391e-29
Dock11	0.578935	4.19957e-113		Sema4d	0.773156	1.0767e-68		Bloc1s2	0.369306	2.37499e-12						Nfkbie	0.582366	1.9772e-29
Atp6v0d1	0.508012	4.74219e-113		Capza2	0.610412	1.67734e-68		Nup214	0.30521	2.52239e-12						Il17ra	0.663889	2.39198e-29
Slc3a2	0.509323	6.92171e-113		Ago2	0.776536	2.10025e-68		H2-D1	0.607574	2.5714e-12						Asph	1.1615	2.97535e-29
Gpsm3	0.334341	1.41668e-112		Xdh	0.719824	2.17468e-68		Sh3glb1	0.599741	2.6193e-12						Numb	0.852758	4.08994e-29
Myo9b	0.515871	1.79156e-112		Sik3	0.766325	2.73656e-68		Paf1	0.254704	2.85609e-12						Mboat7	0.599562	4.20579e-29
Mir155hg	0.952705	3.08938e-112		Slc41a2	0.601042	3.73398e-68		Vdr	0.355522	2.8712e-12						Plekhm2	0.775694	4.42135e-29
Dusp5	0.556579	3.53408e-112		Ifngr1	0.680377	4.18946e-68		Sp100	0.518256	3.43287e-12						Arhgap31	0.974072	3.26597e-28
Camk2d	0.795354	9.34699e-112		Slc26a11	0.348536	4.5864e-68		Plekhm2	0.550542	3.43517e-12						Casp4	0.95109	5.43159e-28
Syne3	0.353633	1.49562e-111		Abl2	0.862331	1.90468e-67		Cux1	0.712678	3.64959e-12						Rock1	0.637277	6.69453e-28
Rhoa	0.481846	4.53091e-111		Gabarapl1	0.495772	3.31596e-67		Atrnl1	1.01518	3.95225e-12						Carhsp1	0.632106	1.02869e-27
Rp2	0.404549	1.21278e-110		Cstb	0.777317	3.54252e-67		Prpf38b	0.506937	4.37095e-12						Inpp5a	0.827004	1.42038e-27
Tmsb4x	0.458642	1.71198e-110		Mcub	0.443683	4.93219e-67		Pde7a	0.410432	5.10605e-12						Atp6v1g1	0.536004	1.47794e-27
Arpc3	0.447437	2.99534e-110		Cdk14	0.729573	5.27615e-67		Zfp638	0.428913	5.36646e-12						Grb2	0.580859	2.49536e-27
Cdyl2	0.442589	1.26896e-109		Aup1	0.372427	7.11314e-67		Arpc1b	0.4902	5.7881e-12						Xpo6	0.757009	2.86959e-27
Dock8	0.411154	1.62953e-109		Itgav	1.12304	7.14822e-67		Nipa2	0.384953	5.98863e-12						Capza1	0.607651	3.65444e-27
Tpp1	0.475752	2.25345e-109		Sh3glb1	0.677799	1.00815e-66		Gnai2	0.534659	6.28679e-12						Ptprj	0.760277	4.96847e-27
Cpeb4	0.598042	2.80562e-109		Rbpj	0.817977	1.28358e-66		Purb	0.473052	6.88528e-12						Crk	0.60871	6.9683e-27
Lamc1	0.783464	7.57502e-109		Ophn1	0.635325	2.23317e-66		Pold4	0.345753	7.03107e-12						C3	0.654871	8.78951e-27
Slc49a4	0.620795	7.75288e-109		Fnip1	0.784147	2.34728e-66		Cnnm2	0.403377	7.07062e-12						Fkbp15	0.801793	1.07476e-26
Mob1a	0.487807	1.17429e-108		Tgif1	0.536847	2.63284e-66		Ranbp2	0.82562	7.95094e-12						Pitpnc1	0.761723	1.6256e-26
Eaf1	0.498451	2.6368e-108		Atp6v1h	0.749315	5.38178e-66		Tmem176b	0.500836	8.13532e-12						Sat1	0.560441	3.35211e-26
Nipsnap3b	0.36251	3.98893e-108		Dtnbp1	0.763132	1.15811e-65		Actg1	0.590271	8.32166e-12						Hbp1	0.573829	6.03396e-26
Zfand5	0.641082	6.59814e-108		Cfh	0.784639	1.59445e-65		Traf3	1.11436	9.11187e-12						Slc9a3r1	0.630132	1.93846e-25
Abl2	0.682633	7.7211e-108		Antxr2	0.589875	1.70209e-65		Btbd9	0.59816	9.31387e-12						Ifngr2	0.694507	2.36217e-25
Med15	0.52692	7.91059e-108		Psmb8	0.454305	2.43794e-65		Nup98	0.571726	1.04362e-11						Sem1	0.442539	4.9639e-25
Ankrd44	0.411265	9.04066e-108		Lhfpl2	0.824419	3.13161e-65		Snx1	0.435775	1.09417e-11						Smap2	0.700446	5.5984e-25
Cacul1	0.583145	1.14471e-107		Fgr	0.276473	4.3277e-65		Txnrd1	0.62778	1.14994e-11						Washc4	0.681617	7.80281e-25
Capn2	0.556168	6.17893e-107		Mir22hg	0.487192	5.10548e-65		Tbc1d15	0.515439	1.20179e-11						Klhl2	0.800602	1.40449e-24
Plekhm2	0.602826	6.31758e-107		Gmip	0.32321	5.80296e-65		Grk2	0.29053	1.24551e-11						Cript	0.583886	2.198e-24
Flcn	0.31549	1.8829e-106		Arhgap10	1.13496	7.98347e-65		Smad4	0.459119	1.32482e-11						Dach1	1.72597	2.50161e-24
Gm15832	0.378444	2.13012e-106		Flii	0.408028	9.37079e-65		Gfod1	0.457253	1.34016e-11						Naa35	0.643418	7.32149e-24
Lrpap1	0.427811	2.26645e-106		Rreb1	0.813361	1.17689e-64		Mau2	0.297614	1.4074e-11						Mctp2	0.83326	8.89846e-24
Arhgap30	0.266911	3.66488e-106		Kctd12	0.748992	1.56833e-64		Mbp	0.47218	1.45243e-11						Tbc1d2b	0.658521	1.3455e-23
Plekhm1	0.48302	4.5816e-106		Jarid2	0.988039	1.91588e-64		Pde6d	0.266839	1.69669e-11						Chmp4b	0.578593	2.6636e-23
Stx7	0.471767	1.18581e-105		Arhgdia	0.567854	2.0501e-64		Hivep2	0.991996	2.00216e-11						Dleu2	0.822583	2.95946e-23
Tmem184b	0.394112	1.51494e-105		Snap23	0.508273	2.9111e-64		Rps9	0.50764	2.40884e-11						Irf5	0.556612	3.78093e-23
Dennd4c	0.765623	2.07731e-105		Tpp1	0.592076	3.20105e-64		Ctsh	0.459102	2.53494e-11						Tle3	0.620894	3.81224e-23
Klhl2	0.649109	2.21112e-105		Bcl2a1b	0.614533	3.96819e-64		Myef2	0.263599	2.78242e-11						Fbxl3	0.626827	5.58036e-23
Arpc2	0.474894	3.59177e-105		Metrnl	0.49834	4.89144e-64		Zfp52	0.451171	2.90972e-11						Mpeg1	0.496761	7.26991e-23
Eif4e	0.747665	5.50275e-105		Bmp2k	0.520303	6.45767e-64		Tap2	0.318253	3.47468e-11						Stat3	0.426343	1.03154e-22
Washc5	0.38755	5.56064e-105		Hk3	0.282062	6.71882e-64		Cyth1	0.3618	3.60403e-11						Lsp1	0.622399	1.67908e-22
Hipk1	0.571721	3.07464e-104		Rnaset2a	0.36669	1.2378e-63		Cox17	0.382625	4.02698e-11						Acap2	0.742526	3.19636e-22
Sms	0.437277	1.36368e-103		Lcp2	0.391433	1.33643e-63		Lncpint	0.548454	4.61248e-11						Phf21a	0.755106	3.43877e-22
S100a10	0.58583	2.11524e-103		Stx7	0.496263	1.92128e-63		Spint1	0.255984	4.70768e-11						St3gal1	0.65627	4.76619e-22
Itga5	0.545711	4.10942e-103		Bcl2l11	0.558495	2.34853e-63		Lilr4b	0.584481	4.76697e-11						Mpzl3	0.787897	9.10101e-22
Ggta1	0.581545	8.11356e-103		Tmem251	0.27807	4.18212e-63		Mkrn1	0.319179	5.1006e-11						Pak2	0.598349	1.02936e-21
Evi2a	0.278029	1.11075e-102		Rab11fip5	0.361999	6.16993e-63		Rala	0.475515	5.10629e-11						Tbc1d8	0.834806	1.43211e-21
Bcl6	0.709334	1.28598e-102		Ikbkb	0.512978	7.91409e-63		Efhd2	0.412777	7.44352e-11						Cln5	0.559596	1.67723e-21
Kctd12	0.614625	1.38773e-102		Lpar1	0.711319	1.35963e-62		Zfp809	0.526652	7.59677e-11						Nckap1l	0.435846	2.54888e-21
Ubash3b	0.573471	4.44276e-102		Pea15a	0.455025	1.44342e-62		Poldip3	0.353691	7.62209e-11						Cds2	0.552232	2.6988e-21
Mef2d	0.56153	5.87792e-102		Donson	0.282711	1.46055e-62		Il4ra	0.354066	8.42417e-11						Ppp1r15a	0.573987	3.3637e-21
Gnai2	0.48546	6.33393e-102		Nhlrc3	0.281388	2.94344e-62		Snap29	0.263316	8.7058e-11						Tnf	1.24707	4.11858e-21
Atp6ap2	0.460806	8.18952e-102		Wdr91	0.38401	3.02951e-62		Hcls1	0.251807	8.93713e-11						Ptpn1	0.901715	7.34282e-21
Tmem50a	0.50958	1.80473e-101		Ddhd1	0.624459	4.59399e-62		Agpat4	0.47662	9.05086e-11						BC005537	0.515422	1.10861e-20
Txn1	0.620631	2.13054e-101		Dnajc15	0.305728	5.74036e-62		Dnajb6	0.443314	9.11163e-11						Fnip1	0.484534	1.11228e-20
Samd8	0.557785	2.5512e-101		Tob2	0.527242	6.07919e-62		Sh3kbp1	0.610445	9.17034e-11						Kdm2a	0.637846	1.18277e-20
Exoc2	0.504417	3.30934e-101		1700017B05Rik	0.382998	7.0824e-62		H2-K1	0.561858	1.03985e-10						Dennd5a	0.578023	1.50044e-20
Ifngr2	0.467263	7.86196e-101		Ttc7b	0.368481	7.53867e-62		Myl12b	0.406931	1.23081e-10						Sirpa	0.573233	2.93441e-20
Rabgef1	0.568318	8.1584e-101		Galns	0.298044	7.88356e-62		Sh3bgrl	0.461835	1.807e-10						Crebrf	0.597319	3.49415e-20
Rnf150	0.524923	1.41518e-100		Tbc1d22a	0.471096	9.05845e-62		Srrm2	0.499013	1.82863e-10						Tbc1d15	0.567071	5.51178e-20
Prr13	0.583174	2.83761e-100		Abcc3	0.263809	1.42987e-61		Ankrd13a	0.318749	2.05638e-10						Klf10	0.613816	1.29839e-19
Diaph2	0.621659	3.49846e-100		Elk3	0.659219	1.92685e-61		Zfp217	0.361363	2.08951e-10						Tpm3	0.402021	3.63945e-19
Ap3s1	0.467362	3.9832e-100		Fam49b	0.600447	2.24273e-61		Brd4	0.420118	2.19642e-10						Tpst2	0.654309	4.34307e-19
Selenop	0.669595	1.32952e-99		Cltc	0.644163	2.55214e-61		Crip1	1.02241	2.49151e-10						H2-D1	0.370946	4.98996e-19
Bmp2k	0.509722	4.12656e-99		Samd8	0.5852	3.32886e-61		H3f3a	0.404431	2.91062e-10						Clec4n	0.737172	5.18735e-19
Serinc1	0.485914	1.46339e-98		Mllt6	0.423817	4.86579e-61		Immp2l	0.632838	2.9222e-10						Zfp407	0.825055	5.69087e-19
Trpv2	0.256965	2.76213e-98		Zdhhc18	0.550153	5.01185e-61		Foxn2	0.460448	3.48912e-10						Tmbim6	0.399033	5.9544e-19
Arhgap31	0.582418	7.18783e-98		Ik	0.582804	5.59551e-61		Ube2l3	0.400107	3.78427e-10						Pxk	0.681151	6.18512e-19
Ubl3	0.500309	7.66052e-98		Taldo1	0.564853	6.10779e-61		Gm47283	0.947625	4.1559e-10						Tcp11l2	0.846951	9.5756e-19
Gnb1	0.4472	1.52443e-97		Spag9	0.660559	7.64606e-61		AA467197	0.639919	4.31114e-10						Rilpl2	0.639403	1.37138e-18
Blvra	0.332078	5.98738e-97		Csk	0.349871	8.79267e-61		Sik2	0.520438	4.60732e-10						Sra1	0.534411	1.62282e-18
Cln3	0.353478	6.30243e-97		Arhgap30	0.27272	1.09492e-60		Rapgef6	0.876455	5.03299e-10						Ddx3y	0.715472	5.6364e-18
Nt5e	0.441185	6.55512e-97		Zfp263	0.322412	1.29551e-60		Fbxw11	0.517081	5.34701e-10						Klhl24	0.599291	9.26051e-18
Snx29	0.634182	6.81021e-97		Tbk1	0.536889	1.35729e-60		Cdc5l	0.344457	5.49396e-10						Ier3	0.342838	9.71107e-18
Agpat4	0.458998	2.89196e-96		Sqstm1	0.712395	1.58322e-60		Mysm1	0.36868	5.54764e-10						Cyba	0.349046	1.67633e-17
Tlr4	0.262508	3.46385e-96		Cttnbp2nl	0.516053	1.86236e-60		Wipf2	0.305773	5.56524e-10						Pias1	0.598921	1.91742e-17
Arpc5	0.486607	5.73511e-96		Pvr	0.383941	1.97748e-60		Paxbp1	0.444149	6.17167e-10						Col4a3bp	0.545261	4.09742e-17
Usf2	0.451193	2.03871e-95		Trim30a	0.396861	2.15504e-60		Arhgap28	0.666352	6.73489e-10						Ppard	0.690162	4.65873e-17
Rhog	0.404144	2.77172e-95		Baz2b	0.62403	5.26758e-60		Mecp2	0.360006	7.06833e-10						Rapgef6	0.655338	6.53953e-17
Lims1	0.520941	6.10833e-95		Dmxl1	0.678807	5.54345e-60		E330009J07Rik	0.530912	7.55204e-10						Parp4	0.610591	1.06e-16
Snx1	0.50986	6.52232e-95		Ifrd1	0.921709	7.13982e-60		Cdc42	0.388531	8.06233e-10						Phactr2	0.625652	1.24323e-16
Actr2	0.446371	8.69278e-95		Lmo2	0.259426	8.31126e-60		Arid4a	0.497802	8.88914e-10						Jund	0.403198	1.31908e-16
Il1rn	0.88159	1.00011e-94		Mtss1	0.930439	1.02633e-59		Tmem168	0.25174	9.27393e-10						Cxcr4	0.423669	1.36245e-16
Arf2	0.370331	1.02942e-94		Wbp2	0.396401	1.03025e-59		Pacsin2	0.427907	9.5533e-10						Fosl2	0.498901	1.54878e-16
Uvrag	0.563271	1.58005e-94		Hsd17b11	0.286173	1.26154e-59		Ywhah	0.590811	1.04098e-09						Etf1	0.440832	1.82741e-16
Plagl2	0.372052	1.9797e-94		Snx2	0.59966	3.06868e-59		Zfx	0.373649	1.15288e-09						Ppt1	0.597257	1.96814e-16
Dapk1	0.748124	2.60745e-94		Fmn1	0.602935	3.19218e-59		Pou2f1	0.627016	1.44995e-09						Nrd1	0.582463	3.40161e-16
Tnfsf12	0.287761	3.99045e-94		Parp14	0.602855	5.77535e-59		Ptprj	0.664747	1.45171e-09						4932438A13Rik	0.701017	4.30775e-16
Lacc1	0.395746	8.61925e-94		Atp6v1g1	0.552674	7.27574e-59		Clic4	0.922353	1.47157e-09						Ccnl2	0.463431	4.36997e-16
Tapbp	0.455122	1.26103e-93		Rufy3	0.600355	8.98302e-59		Zhx2	0.438409	1.48346e-09						Nfkbia	1.00064	5.9153e-16
Snx24	0.782578	1.43695e-93		Traf3	0.728093	9.16489e-59		Nfya	0.272723	1.56451e-09						D8Ertd738e	0.556346	1.3187e-15
Fam219a	0.629572	1.62089e-93		Fam214b	0.301782	1.0694e-58		Mdfic	0.543879	1.62105e-09						Emb	0.525763	1.35154e-15
Slc9a9	0.801126	2.19971e-93		Emb	0.520615	1.30268e-58		Ccdc12	0.287099	1.64822e-09						Nup98	0.551124	1.71077e-15
Cdc42se2	0.498939	3.74319e-93		Ttc7	0.439058	1.33559e-58		P2rx4	0.330955	1.65619e-09						Morc3	0.589873	4.69007e-15
Cdk6	0.757147	4.16323e-93		Tbc1d2b	0.475384	1.40631e-58		Cep350	0.454866	1.90098e-09						Elf2	0.53869	6.8183e-15
A330023F24Rik	0.280544	4.51246e-93		Fmnl2	1.17167	1.67464e-58		Malat1	0.503285	2.01069e-09						Itpkb	0.637883	7.60796e-15
5031439G07Rik	0.459324	5.27663e-93		Tex2	0.770353	2.14887e-58		Kdm3b	0.364719	2.03536e-09						Ero1l	0.707426	2.13116e-14
Cd47	0.467407	7.22827e-93		Skap2	0.526257	2.3501e-58		Dusp3	0.326148	2.29688e-09						Clic1	0.367907	2.88988e-14
Spryd7	0.463367	1.76216e-92		Mkrn1	0.368317	3.78808e-58		Nck2	0.512817	2.68502e-09						Scarb2	0.655197	3.03193e-14
Appl2	0.34843	2.14967e-92		Gfpt1	1.00748	4.8104e-58		Phf3	0.429347	2.75681e-09						Celf2	0.492633	4.61374e-14
Arrdc4	0.416625	3.07582e-92		Cacul1	0.516673	4.9097e-58		Suz12	0.376128	2.83076e-09						Ep300	0.565035	5.19664e-14
Hipk2	0.911873	4.06192e-92		Notch2	0.616815	6.55913e-58		Akap10	0.460029	2.83904e-09						Bach1	0.501012	8.39022e-14
Elmo1	0.38816	6.01553e-92		Snx3	0.562023	9.37446e-58		Smdt1	0.465308	3.1225e-09						Mpp1	0.637232	9.20481e-14
Tmem135	0.534859	8.52408e-92		Tbc1d15	0.572226	1.01197e-57		Gmeb2	0.412123	3.19105e-09						Aff1	0.842796	1.06177e-13
Xiap	0.491325	5.34339e-91		Sat1	0.833829	1.47512e-57		Rnf24	0.582172	3.34526e-09						Elmsan1	0.863276	1.10429e-13
Tmem192	0.383699	1.10597e-90		Mapkapk3	0.539034	1.91209e-57		Tent2	0.385871	3.35105e-09						Arid5b	0.882456	1.59169e-13
Ciao2a	0.354617	1.21938e-90		Fam174a	0.337041	1.93811e-57		Msi2	0.742682	3.56236e-09						Gm20186	0.656631	2.04651e-13
Ywhag	0.477033	2.00947e-90		Fem1b	0.637189	2.09973e-57		Ppp1r12a	0.412267	3.83222e-09						Kdm7a	0.489856	2.53988e-13
Pcbp2	0.451213	7.45339e-90		BC005537	0.573021	2.19419e-57		Dclre1c	0.487079	3.87006e-09						Tank	0.442605	2.70115e-13
Mllt6	0.371393	1.40551e-89		Tep1	0.28283	2.6235e-57		Nod2	0.422033	4.01634e-09						Nr4a3	0.620087	3.59315e-13
Atp9b	0.554195	2.06963e-89		Kdm7a	0.693812	2.71948e-57		Calm3	0.308373	4.02157e-09						Svil	0.695868	3.61555e-13
Stard9	0.382937	3.05987e-89		Camta2	0.27252	2.73436e-57		Eri1	0.300145	4.69042e-09						Arap1	0.448241	6.10984e-13
Rab7	0.279339	5.73759e-89		Ldlrap1	0.464138	3.77008e-57		Zfp451	0.351586	4.79881e-09						Plekho2	0.553349	7.22479e-13
Agps	0.433326	1.54666e-88		Rabep1	0.557415	3.79154e-57		Serinc5	0.612805	5.05591e-09						Rnf19a	0.615687	1.09056e-12
Litaf	0.390695	1.70131e-88		Slc22a4	0.561513	4.95267e-57		Rspry1	0.395493	5.2246e-09						Ftl1-ps1	0.438058	1.24211e-12
Zc3hav1	0.620695	2.62359e-87		Pacsin2	0.415062	1.03024e-56		Pxdc1	0.765973	5.2691e-09						Myh9	0.396195	1.62484e-12
Mfhas1	0.591313	6.07061e-87		Clec2d	0.528238	1.35641e-56		Fndc3a	0.360098	5.30898e-09						Atp6v1b2	0.538084	1.75773e-12
Cyb5a	0.644241	1.68567e-86		Plbd1	0.632881	1.54277e-56		Mier1	0.389932	5.39944e-09						Sec24b	0.639425	3.92689e-12
Arhgef2	0.389991	2.37577e-86		Tpcn2	0.289895	2.29398e-56		Nudt9	0.406344	5.82273e-09						Ypel3	0.512116	4.70546e-12
Peak1	0.638411	2.5752e-86		Xylt1	0.638135	3.85527e-56		Cdk12	0.39924	5.82841e-09						Csrnp1	0.529496	7.38282e-12
Slpi	0.651233	2.60987e-86		Galnt6	0.339757	4.00976e-56		Ndufb1-ps	0.349401	6.09032e-09						Cers6	0.68747	1.64927e-11
Ahnak	0.479695	9.38907e-86		Gdi2	0.57419	9.82789e-56		Cotl1	0.356519	6.48124e-09						Gnai3	0.351057	2.97032e-11
Cers6	0.733126	5.53959e-85		Tmem256	0.42475	1.25842e-55		Ktn1	1.20754	6.82999e-09						Tsc22d4	0.591987	4.27466e-11
Adam15	0.406842	8.42048e-85		Zfand3	0.616606	1.30998e-55		Dyrk2	0.292648	6.83311e-09						Rel	0.439574	4.98173e-11
Plekhb2	0.411227	1.52892e-84		Tcp11l2	0.60213	1.48617e-55		Dock5	0.381623	6.88672e-09						Pgd	0.631755	5.78543e-11
BC005537	0.470081	2.02969e-84		Slc11a2	0.489555	1.57438e-55		Gtf2a1	0.402539	7.22511e-09						Mindy1	0.539862	7.27303e-11
Tgif1	0.431073	3.25876e-84		Tmbim1	0.504786	1.59501e-55		Tmcc3	1.6906	7.28834e-09						Orai1	0.487292	8.17484e-11
Bcar3	0.567635	3.6001e-84		S100a4	1.0877	1.61367e-55		Ap3b1	0.394762	7.34638e-09						Traf3	0.724818	1.31918e-10
Tubgcp4	0.378207	4.01749e-84		Pfn1	0.641378	1.66366e-55		Sf3b1	0.367605	7.86099e-09						Prkar1a	0.394753	1.34642e-10
Plcg2	0.37846	4.3983e-84		Rnf213	0.569974	1.84204e-55		Wdr33	0.317507	7.88183e-09						Snx13	0.619238	1.40655e-10
Arhgap17	0.539974	5.22995e-84		Tapbp	0.484656	2.18839e-55		Atp6v0d1	0.328188	8.43199e-09						Mgat4a	0.451717	1.49933e-10
Impact	0.574714	9.38626e-84		Fli1	0.403265	4.22867e-55		Slc6a6	0.306592	9.29159e-09						Ythdf3	0.485349	1.61181e-10
Il1b	1.4456	1.05992e-83		H3f3a	0.542285	5.72444e-55		Trps1	0.614891	9.92682e-09						Bcl2a1b	0.695084	2.23585e-10
Slc38a1	0.294923	1.0738e-83		Birc3	0.584714	8.2932e-55		Ncoa2	0.50478	1.03545e-08						Myo9b	0.569483	2.48527e-10
Wdr26	0.449202	1.48687e-83		Plcl1	0.691617	9.93213e-55		Lsr	0.267113	1.09681e-08						Gch1	0.607816	2.64054e-10
Zfp516	0.468111	3.43271e-83		Bax	0.420527	1.2368e-54		Braf	0.358918	1.12168e-08						Gm15283	0.454279	2.92929e-10
Rap1a	0.459842	7.57698e-83		Neurl3	0.3068	1.33481e-54		Hspa8	0.50281	1.13007e-08						Sun2	0.478296	7.20332e-10
Pten	0.625767	8.76165e-83		Malt1	1.25868	1.66224e-54		Nae1	0.365297	1.18045e-08						Rbpj	0.484605	7.83967e-10
Ubc	0.604521	1.53338e-82		Dnase2a	0.349741	1.72879e-54		Asxl2	0.394168	1.31409e-08						Ap2b1	0.51727	7.90167e-10
Gls	0.494336	4.53765e-82		Map3k1	0.460533	1.90969e-54		C9orf72	0.33307	1.34392e-08						Lims1	0.754639	9.94774e-10
Ensa	0.39479	8.92808e-82		Fam107b	0.479765	2.44602e-54		Lrba	0.510641	1.45867e-08						Furin	0.525438	1.49007e-09
Gpd2	0.528307	1.15491e-81		Atp6v1f	0.527769	2.57245e-54		Kdm5c	0.372794	1.48534e-08						Tspan14	0.624981	1.7942e-09
Gm20732	0.43564	1.25895e-80		Wwp1	0.84551	3.64345e-54		Tbc1d5	0.518749	1.96088e-08						Tln1	0.448835	2.84489e-09
Tgfbi	0.611326	2.81086e-80		Sash1	0.724323	4.88732e-54		Sec61b	0.47723	2.18689e-08						Slc6a6	0.44242	3.108e-09
Hexb	0.364234	3.1532e-80		Apobec3	0.295532	6.34441e-54		Arfgap3	0.495401	2.21939e-08						Zfp36	0.411387	3.19076e-09
Tmbim1	0.411704	3.75193e-80		Gna12	0.423681	8.48744e-54		Dnm1l	0.361886	2.32633e-08						Pafah1b1	0.293854	3.51704e-09
Mmp9	0.500141	1.80259e-79		Map3k14	0.487874	1.56819e-53		Pip5k1c	0.264179	2.42505e-08						Pfkp	0.526729	3.86191e-09
Lactb2	0.359799	5.84868e-79		Arpc4	0.485472	1.94443e-53		Adssl1	0.27363	2.49954e-08						Slc44a1	0.829244	4.36436e-09
Rab12	0.418586	7.2964e-79		Bclaf3	0.412646	2.04588e-53		Cers6	0.964569	2.60615e-08						Nfkbiz	0.800528	4.99031e-09
Gch1	0.407258	7.31401e-79		Rnf150	0.540333	2.13621e-53		Atp6v1f	0.379344	2.79136e-08						Skil	0.513958	6.60014e-09
Man2b1	0.419948	1.33912e-78		Cdkn1a	0.632456	2.193e-53		Nmt1	0.348424	2.97098e-08						Cast	0.401039	7.65888e-09
Crem	0.377269	1.66883e-78		Rnf13	0.41839	2.608e-53		Rac2	0.277964	3.05263e-08						Zfp106	0.476457	8.46194e-09
Lcorl	0.710003	2.12546e-78		Cfl1	0.567752	3.39108e-53		Ttc19	0.298402	3.05265e-08						Wsb1	0.387742	1.01481e-08
Gmfb	0.3862	2.18096e-78		Hpgds	0.559132	4.11052e-53		Txndc11	0.277569	3.29279e-08						Cdk13	0.588863	1.37839e-08
Mtmr6	0.351741	2.92622e-78		Thbs1	1.08137	5.59264e-53		Sumo2	0.336859	3.31173e-08						Jak1	0.269623	1.4437e-08
Stx4a	0.374442	4.23907e-78		Samhd1	0.554432	5.7929e-53		Alg9	0.279617	3.4415e-08						B4galt5	0.647283	1.59525e-08
Uhrf1bp1l	0.50205	2.59395e-77		Dock4	0.612162	7.70895e-53		Med13l	0.539964	3.4513e-08						Hif1a	0.251402	1.81245e-08
Chd7	0.421151	2.65438e-77		Naaa	0.39121	9.62034e-53		Specc1l	0.469706	3.45948e-08						Mier1	0.515866	3.27118e-08
Ano6	0.605743	3.40584e-77		Tcp11l1	0.279397	1.24417e-52		Nfkb1	0.553246	3.54468e-08						Lncpint	0.380849	3.48422e-08
Cmpk1	0.380518	1.01142e-76		Ankrd44	0.341669	1.279e-52		Samhd1	0.401346	3.59244e-08						Gnai2	0.305058	3.61797e-08
Sfxn3	0.317504	1.21132e-76		Ppp2ca	0.513267	1.93267e-52		Lztfl1	0.443611	3.69101e-08						Atp1b3	0.391353	6.01888e-08
Traf3	0.479896	3.82848e-76		Tor1aip1	0.455105	1.9614e-52		Trim35	0.347538	4.64543e-08						Tmbim4	0.509472	6.89801e-08
Spred1	0.508748	4.45155e-76		Hmox1	1.26229	2.77204e-52		Plxnd1	0.399249	4.72378e-08						Spen	0.629411	7.33178e-08
Eea1	0.463622	5.94398e-76		Isg15	0.817175	2.87868e-52		Smad7	0.379926	4.7549e-08						Ssh2	0.773877	7.42437e-08
Ccdc71l	0.348352	6.31862e-76		Mgrn1	0.322448	3.4587e-52		Chst11	0.570267	4.85234e-08						Zfp36l2	0.636349	7.94299e-08
Tpm3	0.358218	6.64222e-76		Med15	0.42252	5.09245e-52		Itm2c	0.312647	5.53163e-08						Cyld	0.628163	1.35219e-07
Ap2b1	0.412721	6.67989e-76		Acox3	0.267671	6.06539e-52		Lrch1	0.523398	5.60365e-08						Cd47	0.502863	1.39165e-07
Arhgap26	0.351925	1.04623e-75		Ifi203	0.661544	6.48845e-52		Lnpep	0.421235	5.6657e-08						Supt4a	0.471064	1.5129e-07
Znrf1	0.449885	1.13722e-75		Smox	0.635892	8.13026e-52		Fxr1	0.376763	6.26528e-08						Wdfy3	0.8183	2.33242e-07
Specc1l	0.477189	1.207e-75		Trim30d	0.296995	1.00811e-51		Ehd1	0.421109	7.29883e-08						Slc49a4	0.557627	2.71156e-07
Tbl1xr1	0.435991	1.56101e-75		Rnpep	0.340637	1.0449e-51		Rras2	0.837748	7.59177e-08						Tpm4	0.356797	2.93613e-07
Jdp2	0.512	1.78084e-75		Mob1a	0.404189	1.20808e-51		B4galt5	0.403375	9.7384e-08						Nfkb2	0.480706	3.18987e-07
Slc31a2	0.383103	2.26553e-75		Rragc	0.420564	1.27418e-51		Setd2	0.384658	9.77149e-08						5031425E22Rik	0.523061	6.06619e-07
Mtm1	0.424231	2.31374e-75		Cmpk1	0.461667	1.77236e-51		Rsf1	0.42131	1.00593e-07						Ilrun	0.451815	8.59687e-07
Tab2	0.384286	4.06179e-75		Pi4k2a	0.50482	2.08522e-51		Ms4a6c	0.328063	1.02506e-07						Pfn1	0.287651	1.05687e-06
Pepd	0.390779	5.2164e-75		Cd274	0.615642	2.33673e-51		Nploc4	0.296002	1.06386e-07						Krcc1	0.513976	1.18964e-06
Capns1	0.393707	6.29621e-75		Gch1	0.584016	2.34038e-51		Mir155hg	0.8026	1.07947e-07						Chd1	0.59945	1.91205e-06
Morf4l1	0.374609	7.40445e-75		Tom1	0.435752	3.8517e-51		Rpl10	0.482319	1.10225e-07						Ggnbp2	0.444072	3.05562e-06
Ptpra	0.465146	2.8381e-74		Gabarap	0.513232	6.16575e-51		Ptpn4	0.415462	1.28526e-07						Phf8	0.5234	4.08746e-06
Myadm	0.396453	3.0389e-74		Mndal	0.590121	7.24608e-51		Tmem243	0.340451	1.30713e-07						Fli1	0.472558	5.13128e-06
Gclc	0.746779	7.69946e-74		Snx1	0.431816	7.8614e-51		Apba1	0.527083	1.33847e-07						Gapdh	0.269738	8.78782e-06
Irak3	0.41706	2.05652e-73		Synj1	0.462958	8.52603e-51		Ext1	0.654455	1.34692e-07						Cltc	0.274257	9.15495e-06
Rapgef2	0.621476	2.99552e-73		Lmnb1	0.471521	3.26309e-50		Ifnar2	0.508864	1.35133e-07						Chm	0.522154	9.18504e-06
Atp2b4	0.514155	3.40043e-73		Cd44	0.620342	5.12584e-50		Crebbp	0.419155	1.40724e-07						Psen1	0.455613	1.14714e-05
Ube2f	0.386882	3.72897e-73		Hspa8	0.539178	5.49997e-50		Ddx17	0.348427	1.53457e-07						Nbr1	0.525207	1.35468e-05
Spop	0.4957	4.14111e-73		Ell2	0.697693	6.4911e-50		Stx7	0.375596	1.72525e-07						Itsn2	0.484945	1.5529e-05
Pi4k2a	0.443139	1.05785e-72		Smpdl3a	0.421643	6.49361e-50		Spred1	0.879833	1.75509e-07						Smad3	0.721503	2.9167e-05
Tspo	0.420379	1.11026e-72		Plekhb2	0.395721	7.85404e-50		Ccdc50	0.392741	1.82528e-07						Stx6	0.678293	3.44405e-05
Taldo1	0.406149	1.63078e-72		Cyp4v3	0.252964	8.15635e-50		Sipa1l3	0.48202	1.88343e-07						Sh3bgrl3	0.304964	4.00103e-05
Grk2	0.333409	3.26092e-72		Runx1	0.68242	8.17843e-50		Dnaja1	0.520956	1.88719e-07						Cab39	0.417581	4.2523e-05
Tmbim6	0.387016	4.52035e-72		Aprt	0.556957	8.68934e-50		Ghitm	0.334947	1.90536e-07						Pcf11	0.427293	6.23319e-05
Col4a3bp	0.464655	4.83483e-72		Tbc1d5	0.55269	1.06488e-49		Aig1	0.519851	2.07522e-07						Atp6v0e	0.283314	6.91886e-05
Gpx1	0.584323	8.80384e-72		Cdc42se2	0.46879	1.22645e-49		Ythdf3	0.336644	2.10118e-07						Nufip2	0.432821	7.7549e-05
Sirt2	0.369127	1.06808e-71		Il1rn	0.895028	1.97089e-49		Gan	0.4243	2.12598e-07						Tnip1	0.541241	8.0246e-05
Rhbdf2	0.374051	1.18209e-71		Casp8	0.293053	2.0634e-49		Ralgps1	0.28069	2.14707e-07						Arid4b	0.29312	0.000107063
Zfp36l1	0.699258	1.31025e-71		Tspo	0.601059	2.28777e-49		2210408F21Rik	0.351835	2.21306e-07						Atf2	0.523889	0.00011422
Riok3	0.382565	1.40425e-71		Vps37b	0.703772	2.31747e-49		Fam168b	0.286941	2.31559e-07						Spp1	1.77534	0.000233681
Diaph1	0.354887	2.25251e-71		Lrp1	0.581904	2.75494e-49		Etnk1	0.371719	2.36161e-07						Micu1	0.572335	0.000273547
Dnajc13	0.428124	3.34412e-71		Igf1	0.608777	3.06188e-49		Stat3	0.539038	2.51985e-07						Trf	0.641985	0.00029211
Tmx4	0.346785	4.12454e-71		Znfx1	0.309101	3.57477e-49		Psmd14	0.35363	2.83616e-07						Rhbdf2	0.396064	0.000349004
Chst11	0.490141	4.44406e-71		Tm2d1	0.27198	4.79319e-49		Nectin1	0.33573	3.01257e-07						Rtf2	0.463361	0.000435759
Vps35l	0.322154	7.1024e-71		Nipsnap3b	0.2643	5.2164e-49		Prr14l	0.292089	3.0733e-07						Mfsd6	0.440252	0.000488644
Sod1	0.40017	8.31547e-71		Pcgf5	0.746559	6.79827e-49		Adora2b	0.320665	3.14108e-07						Washc2	0.534838	0.000532404
Hspa4l	0.583695	1.20715e-70		Ube2l3	0.453763	6.83573e-49		Ube2h	0.586759	3.51784e-07						Creb1	0.46612	0.000562217
Mthfs	0.27953	1.4443e-70		Ist1	0.377959	8.47298e-49		Mrpl38	0.250967	3.77464e-07						Wdr26	0.3228	0.000619386
Rnf115	0.422322	3.31407e-70		Arpc2	0.484467	9.16311e-49		Scand1	0.333915	4.64782e-07						Pdpk1	0.460417	0.00078782
Cmtm3	0.252692	3.77013e-70		Mpp7	0.972782	9.32031e-49		Foxp4	0.541896	4.88362e-07						Mef2a	0.344124	0.00100112
Gabarap	0.389944	6.23156e-70		Cd47	0.511022	1.33221e-48		Ust	0.740108	5.02803e-07						Rap2c	0.442434	0.00110925
Zbtb7a	0.396324	2.11019e-69		Rab5c	0.482848	1.38456e-48		Tnfrsf9	0.607748	5.39259e-07						Sri	0.449678	0.0013052
Ly96	0.264607	2.5841e-69		Apbb1ip	0.376102	1.41379e-48		Mapk1	0.372731	5.52287e-07						Cdc27	0.643924	0.00163027
Sbf2	0.492841	3.46648e-69		Il4ra	0.52469	1.43693e-48		Nrbp1	0.280344	5.5529e-07						Kdm5b	0.391744	0.00179472
Rhoq	0.36635	3.93396e-69		Bcl2a1d	0.388584	1.63299e-48		Rab12	0.324433	5.58568e-07						Dyrk1a	0.40258	0.00209475
Ophn1	0.506415	5.83881e-69		Ifitm2	0.566886	3.07657e-48		Fgfr1op	0.384515	5.89528e-07						Rbm47	0.315751	0.00249119
Gmip	0.271573	7.04538e-69		Pxk	0.534334	3.98913e-48		Hsd17b10	0.278906	5.92832e-07						Nsf	0.282773	0.00277743
Klf6	0.48057	1.41332e-68		Ppig	0.541336	4.55336e-48		Mndal	0.360644	6.35157e-07						Ist1	0.392305	0.00309945
Nsf	0.537436	2.24097e-68		Zmiz2	0.313184	4.72745e-48		Fli1	0.620441	6.57354e-07						Atxn10	0.517368	0.00368335
Cttnbp2nl	0.410504	2.34462e-68		Prkcd	0.455958	4.81395e-48		Son	0.295508	7.44012e-07						Ogt	0.349576	0.0050665
Fbxl3	0.383897	2.86846e-68		Psme1	0.439501	5.24418e-48		Mpp6	0.419708	8.04847e-07						Ppp1r12a	0.268741	0.00605001
Homer3	0.320017	3.13359e-68		Plcg2	0.285481	7.96781e-48		Stip1	0.315307	8.50546e-07						Smchd1	0.893956	0.00686796
Vps50	0.403352	4.43293e-68		Dnajc13	0.44047	1.1201e-47		Dock11	0.412867	9.28989e-07						Gng12	0.457353	0.00816445
Pde7b	0.437213	6.38672e-68		Vps26a	0.3819	1.20336e-47		Npc2	0.418478	9.30124e-07						Tcn2	0.377648	0.0085223
Tnfrsf11a	0.322403	6.86706e-68		Gnptab	0.555155	1.59836e-47		Arpc4	0.316585	9.32883e-07						Wfdc17	0.736421	0.0103301
Tbc1d5	0.466929	8.43142e-68		Rab3gap2	0.535045	1.97761e-47		Ralgapb	0.300319	9.43517e-07						March6	0.479001	0.0105324
Egr2	0.357816	8.58566e-68		Hmgcl	0.284888	2.15314e-47		Rps6ka5	0.74275	9.9056e-07						Hdac4	0.614767	0.011545
Eps8	0.588409	1.02605e-67		Arl6ip1	0.470468	3.007e-47		Dnajc8	0.262785	1.01175e-06						1810026B05Rik	0.402383	0.025392
Wtap	0.356875	1.13378e-67		Map4k3	0.668426	3.44356e-47		Sin3b	0.250666	1.03888e-06						Tomm6	0.331339	0.0266332
Cfl1	0.42766	1.20174e-67		Nmt1	0.354352	4.41755e-47		Clasp2	0.543189	1.08138e-06						Atp6ap2	0.447375	0.0276591
Bach2	0.56094	1.45101e-67		Wfdc17	1.63614	4.63925e-47		Nr2c2	0.345727	1.12826e-06						Elk4	0.388612	0.0323946
Ptpn12	0.453879	2.03204e-67		Nlrp3	0.440153	5.10107e-47		Dot1l	0.418536	1.13578e-06						Qsox1	0.491214	0.0323988
Snx5	0.456957	2.42289e-67		Esd	0.588982	5.16349e-47		St6gal1	0.340095	1.23859e-06						Zc3h12a	0.485311	0.0391914
Pik3ca	0.447808	5.68758e-67		Ensa	0.351773	6.03292e-47		Orai1	0.427345	1.34222e-06						Relb	0.430811	0.0393334
Nr3c1	0.457611	7.5087e-67		Lrpap1	0.405502	6.99287e-47		Git2	0.329257	1.3813e-06						Tuba1c	0.273802	0.04314
Bclaf3	0.367165	9.50509e-67		Ctsl	0.885387	8.00214e-47		Avpi1	0.25006	1.3846e-06						Nr3c1	0.445756	0.0465581
Hspa8	0.619276	1.13938e-66		Pgd	0.370519	8.4362e-47		Scaf4	0.285371	1.50936e-06
Msn	0.347544	2.74614e-66		Plagl2	0.29286	9.63013e-47		Bcl2l11	0.349823	1.69047e-06
Gtf2a1	0.362875	3.24136e-66		Myo9b	0.433593	1.08353e-46		Trim30a	0.307736	1.90354e-06
Mnt	0.319829	3.5665e-66		Slc48a1	0.462605	1.32196e-46		Glyr1	0.284946	2.09401e-06
Mef2a	0.446858	4.17937e-66		Tmem160	0.313671	1.87476e-46		Ap2b1	0.254857	2.16367e-06
Snx2	0.402376	4.60333e-66		Anxa11	0.500408	2.12044e-46		Tnip1	0.426251	2.52958e-06
Patl1	0.344521	8.94146e-66		Bach1	0.763409	2.13854e-46		Sec11c	0.263844	2.5659e-06
Mndal	0.435727	1.40006e-65		Gosr2	0.313819	2.42651e-46		Rnh1	0.33628	2.62812e-06
Ly6e	0.407075	1.76923e-65		Glul	0.655159	2.8206e-46		Bmt2	0.359702	2.82078e-06
Nfya	0.321614	2.18338e-65		Mtmr10	0.63516	3.24091e-46		Lemd3	0.455634	2.95697e-06
Atp6v1h	0.537224	2.4971e-65		Htatip2	0.31663	3.44604e-46		Itch	0.410241	3.30966e-06
Mapre2	0.427227	4.01967e-65		Skil	0.487793	4.23614e-46		Zdhhc18	0.43762	3.41725e-06
Ifi27l2a	0.443678	4.21693e-65		Nbr1	0.37592	5.09309e-46		Taok1	0.374442	3.50244e-06
Glrx	0.383181	7.73517e-65		Rasgef1b	0.620123	5.50609e-46		Fam13b	0.362969	3.54131e-06
Igf2r	0.36627	1.15687e-64		Rel	0.624462	6.10122e-46		Shisa5	0.277607	3.84482e-06
Dclre1c	0.423466	1.27975e-64		Sp100	0.258486	6.75046e-46		Coq10b	0.284388	3.96558e-06
Atp6v0e	0.361137	1.39759e-64		Mospd2	0.398949	8.31758e-46		Itpr1	0.353327	3.99739e-06
Ddhd1	0.585431	1.58218e-64		Clec4e	0.744753	1.42089e-45		Ist1	0.271156	4.57864e-06
Map2k1	0.403673	1.71904e-64		Enox2	0.379267	1.84541e-45		Arhgdib	0.330578	4.61329e-06
Wwp2	0.292296	3.31e-64		D8Ertd738e	0.487758	2.03218e-45		Cflar	0.38015	4.74422e-06
Tln1	0.339757	3.75873e-64		Stx4a	0.349512	2.30502e-45		Nedd8	0.28713	4.9415e-06
Atp6v1g1	0.369489	3.92464e-64		Itgb7	0.417921	2.8551e-45		Chfr	0.253338	5.20993e-06
Slc15a4	0.346078	8.173e-64		Fbxl2	0.317292	2.91518e-45		Vamp4	0.330537	5.40751e-06
Hbp1	0.373822	1.04138e-63		Nfkbib	0.375266	3.04155e-45		Ube2j1	0.262844	5.56916e-06
Fndc3b	0.329642	2.07043e-63		Smchd1	0.68574	4.15277e-45		S100a11	0.338454	5.85596e-06
Washc4	0.342105	6.34518e-63		Sumf1	0.258864	4.9609e-45		Rapgef2	0.682857	5.86293e-06
Phf20	0.401232	1.08388e-62		Usf2	0.399874	6.06052e-45		Itprid2	0.360992	5.9619e-06
Grb2	0.376283	1.14884e-62		Uhrf2	0.711243	6.69262e-45		Sirt2	0.253475	6.15716e-06
Rasgef1b	0.506953	1.20935e-62		Serinc1	0.422878	1.26672e-44		Cblb	0.807756	6.73729e-06
Snx3	0.356001	1.4722e-62		Arg2	0.290819	1.61814e-44		Lin54	0.361615	7.3587e-06
Fam13b	0.385182	1.78732e-62		Slc16a6	0.284954	1.70391e-44		Nfat5	0.553141	7.75032e-06
Pnpla7	0.294385	1.89753e-62		Sulf2	0.316324	2.30298e-44		Rnf216	0.300498	7.86577e-06
Ppt1	0.288141	2.51721e-62		Ythdf3	0.467647	2.62324e-44		Cnot4	0.384084	7.89257e-06
Snx12	0.410679	3.46525e-62		Mtmr6	0.320014	2.78914e-44		Zfp871	0.270765	8.14016e-06
Slc31a1	0.415584	3.66914e-62		Arhgef2	0.323493	2.97416e-44		Pea15a	0.264459	8.17768e-06
Ppig	0.384152	6.20721e-62		Pde2a	0.289839	3.8421e-44		Nap1l1	0.4068	8.99094e-06
Man1c1	0.350893	1.39177e-61		Lrrfip1	0.568418	4.16896e-44		Rap1a	0.559225	9.79063e-06
Lamtor3	0.358523	2.33804e-61		Mpp1	0.333406	6.04862e-44		Chordc1	0.335145	1.00751e-05
Vcan	0.510947	2.73991e-61		Kcnn4	0.345877	6.40999e-44		Nipbl	0.336081	1.0261e-05
Kansl1	0.432423	2.74318e-61		Ube2f	0.426258	6.62773e-44		Nfatc3	0.374614	1.03237e-05
Galnt6	0.32519	3.11997e-61		Arf2	0.25752	7.21607e-44		Arhgdia	0.318592	1.06082e-05
Snx13	0.431933	3.72817e-61		Atxn7l1	0.48388	1.41455e-43		Map3k3	0.318845	1.09562e-05
Elf2	0.49902	3.80646e-61		Ppp1r12c	0.297603	1.51784e-43		St3gal4	0.373595	1.13171e-05
Tmed10	0.352365	4.28776e-61		Dleu2	0.93924	1.99653e-43		Stx5a	0.308308	1.19914e-05
Lrrk2	0.470937	7.36079e-61		Stam2	0.638383	2.55525e-43		Itsn2	0.278615	1.22948e-05
Map3k2	0.405907	1.67706e-60		Tmem176b	0.524623	3.82397e-43		Sbds	0.287599	1.24544e-05
Nufip1	0.371118	2.24306e-60		Brk1	0.403138	4.8888e-43		Adipor2	0.41959	1.24929e-05
Itsn1	0.450761	3.1738e-60		Sel1l	0.331252	5.65647e-43		Hsd17b4	0.322417	1.25777e-05
Mpp1	0.313537	4.49949e-60		Epn1	0.293244	6.3745e-43		Ptk2b	0.425292	1.34163e-05
Ldlrap1	0.322375	6.45603e-60		Washc4	0.336059	6.53161e-43		Ddx5	0.306767	1.37317e-05
Impdh1	0.290397	1.52503e-59		Phf20	0.411028	6.74263e-43		Atp6ap2	0.278692	1.41596e-05
Arhgap15	0.257377	2.37426e-59		Capn2	0.423713	8.29053e-43		Tet2	0.331573	1.47693e-05
Prdx5	0.455878	2.38792e-59		Agpat4	0.389462	8.84196e-43		Kpna3	0.511607	1.50252e-05
Abhd12	0.357856	2.41602e-59		Sppl2a	0.460436	1.01395e-42		Cd82	0.265034	1.53538e-05
Thbd	0.587356	2.4578e-59		Lgals8	0.33477	1.04698e-42		Arf4	0.38927	1.53584e-05
Bst2	0.332668	2.54636e-59		Trafd1	0.286878	1.09343e-42		Cul1	0.286496	1.82641e-05
Armh3	0.394434	3.78201e-59		Abcg1	0.460291	1.10176e-42		Lilrb4a	0.469741	1.94096e-05
Atxn7l1	0.408338	4.08779e-59		2210408F21Rik	0.345125	1.26139e-42		Clec4n	0.409045	2.12245e-05
Kidins220	0.39779	5.22893e-59		Braf	0.421443	1.54027e-42		Aff4	0.331695	2.22784e-05
Ywhah	0.383905	7.42585e-59		Pde4b	0.595688	1.5553e-42		Ddit4	0.437182	2.47627e-05
Zfp871	0.365842	7.61755e-59		Scand1	0.384915	1.63416e-42		Cnot1	0.266335	2.49901e-05
Rassf3	0.313455	1.44844e-58		Ago3	0.484142	1.66705e-42		Zyx	0.281355	2.51169e-05
Dennd5a	0.298051	2.01001e-58		Washc5	0.283576	1.77231e-42		Tmem19	0.271852	2.66327e-05
Hccs	0.362292	2.08251e-58		Sdccag8	0.315951	1.81552e-42		Tnrc18	0.383497	3.14748e-05
Serinc3	0.357971	3.01126e-58		Il7r	0.677662	2.26954e-42		Fryl	0.340688	3.28671e-05
Fam174a	0.285944	5.27957e-58		Gas7	0.464465	2.52488e-42		Iqgap1	0.36546	3.49545e-05
Exoc5	0.408836	1.09115e-57		Ap2s1	0.386581	2.93595e-42		Prkag2	0.461433	3.508e-05
Ythdf3	0.385804	1.47557e-57		Cmtm3	0.25663	3.04579e-42		Cox5a	0.261604	3.57601e-05
Arpc4	0.356908	1.53912e-57		Chd7	0.586413	3.77178e-42		Arl3	0.252192	3.85291e-05
Wbp2	0.325512	4.24276e-57		Zswim4	0.392506	5.41861e-42		Clcn5	0.547343	3.98345e-05
Cdkn1a	0.373054	9.73981e-57		Psmb9	0.272552	6.98743e-42		Rbm25	0.348417	4.63723e-05
Rab5c	0.3187	1.00071e-56		Slc17a5	0.294652	8.61456e-42		Tmod3	0.299439	5.11714e-05
Nab1	0.325672	1.14112e-56		Zfp36	0.726578	9.12297e-42		Mllt10	0.398055	5.43511e-05
Nipbl	0.370753	1.27674e-56		Timp2	0.872011	1.46139e-41		Arhgef10l	0.288053	5.47993e-05
Rgcc	0.451055	1.351e-56		Dock7	0.417322	1.65344e-41		Cstf3	0.316987	5.58653e-05
Tpst2	0.272593	1.58038e-56		Ankrd33b	0.407648	1.67303e-41		Map2k1	0.379182	6.2082e-05
Arhgap18	0.442467	1.64972e-56		Ddrgk1	0.284452	2.09658e-41		Atp6v0b	0.359814	6.26215e-05
Prcp	0.308335	2.58615e-56		Fcho2	0.444931	2.80584e-41		Zfr	0.361271	6.43302e-05
Zfp52	0.375153	3.03821e-56		Plbd2	0.292248	3.4066e-41		Crebrf	0.271388	6.50082e-05
Cep85l	0.396155	3.29268e-56		Relb	0.339141	7.31892e-41		Mta3	0.315938	6.593e-05
Nln	0.333962	7.3533e-56		Itsn1	0.529365	7.97683e-41		Arid2	0.315286	7.31753e-05
Nr4a2	0.43863	1.03116e-55		Pold4	0.279284	8.18103e-41		Pten	0.395399	8.42804e-05
Ciapin1	0.328042	1.14291e-55		Mob3b	0.522834	1.07641e-40		Tnrc6c	0.272013	8.6603e-05
Foxn2	0.332865	2.83651e-55		Tpm3	0.431385	1.31172e-40		Clta	0.271277	9.01556e-05
Spata6	0.353055	4.31993e-55		Vrk2	0.327044	1.47428e-40		Vrk2	0.263664	9.22588e-05
Ankrd28	0.453382	5.93494e-55		Fam20c	0.320723	1.66529e-40		Plpbp	0.282367	0.000103306
Skil	0.337017	1.11307e-54		Prkag2	0.360133	1.90695e-40		Tcirg1	0.347658	0.000105749
Prkar1a	0.340014	1.32337e-54		Tmem50a	0.39892	2.01663e-40		Rps13	0.335147	0.00011536
Cmip	0.336646	1.39595e-54		Ubc	0.630061	2.42222e-40		Slc41a2	0.397958	0.000124348
Eno1	0.369194	1.96239e-54		Ctps2	0.286674	2.58409e-40		Acbd3	0.321323	0.00014097
Sik2	0.369702	3.02386e-54		Capzb	0.434722	2.60141e-40		Dhx40	0.591941	0.000150235
Arid5b	0.500147	5.63562e-54		Snrpb2	0.278133	2.8227e-40		Pias1	0.341536	0.000152401
Vps13b	0.384981	9.39133e-54		Ralgds	0.378132	3.67602e-40		Rsbn1l	0.253933	0.000156856
Gdi2	0.319788	1.29563e-53		Cpeb4	0.455479	3.75599e-40		Ppp2r5a	0.303648	0.000162185
Pmp22	0.575131	1.34318e-53		Arih2	0.457459	4.07757e-40		Sfmbt1	0.462218	0.000163543
Vps13c	0.339909	1.65027e-53		Kras	0.469806	4.4225e-40		Cdc42se2	0.350802	0.000169854
Fcho2	0.384848	1.74103e-53		Mvp	0.358707	5.23688e-40		Rai1	0.26284	0.000180745
Nsmce2	0.387666	1.78995e-53		Atp6v1b2	0.511285	7.42817e-40		Marcks	0.459457	0.000185477
Mkrn1	0.271224	1.9303e-53		Hmox2	0.26681	8.07827e-40		Rap1b	0.26651	0.00019714
Fgd6	0.302943	2.2467e-53		Fam76a	0.281925	9.23136e-40		Ifi27l2a	0.503007	0.000215416
Tbc1d23	0.320798	2.54356e-53		Nrg1	0.865955	9.9584e-40		Slc15a4	0.260437	0.00021927
Gm14636	0.771956	3.68341e-53		Rabgef1	0.523078	1.10259e-39		Mlxip	0.3516	0.000223345
Sh3bgrl3	0.39308	4.17505e-53		Cdc42ep4	0.378114	1.24167e-39		Ubash3b	0.875491	0.000236399
Vmp1	0.433087	4.95316e-53		Sod1	0.307946	1.71494e-39		Cdk17	0.305485	0.000250773
Zcchc2	0.360928	5.47908e-53		Ell	0.307821	1.72693e-39		Kras	0.330406	0.0002563
Vapa	0.329355	5.84187e-53		Vps35l	0.276447	1.8553e-39		Clk1	0.27652	0.000260092
Tsc22d3	0.390828	6.18601e-53		Nsmce2	0.426139	2.32055e-39		Inf2	0.284256	0.000266488
Rnf41	0.296847	6.52803e-53		Ripk1	0.329852	2.32062e-39		Slc49a4	0.268197	0.000281492
Odc1	0.797561	1.00028e-52		App	0.53969	2.38422e-39		Lrch3	0.301793	0.000282268
Sept8	0.34847	1.04912e-52		Rsu1	0.274523	2.47523e-39		Mtmr12	0.363797	0.000300727
Sppl2a	0.325136	2.26432e-52		Pik3r1	0.460105	2.73178e-39		Wac	0.342703	0.000308454
Pgam1	0.362938	2.28335e-52		Tbc1d4	0.311085	3.55892e-39		Acvr2a	0.302572	0.00032247
Sh3glb1	0.321953	2.69011e-52		Arhgef10l	0.309502	3.7513e-39		Arpc2	0.26389	0.000337851
Stam2	0.496613	4.73395e-52		Junb	0.803314	4.10226e-39		Cop1	0.32727	0.000342171
Pacsin2	0.312121	4.85786e-52		Itm2c	0.342001	4.41205e-39		Nsd2	0.348982	0.000343933
Rsu1	0.371559	7.81765e-52		Vdac2	0.346836	4.55642e-39		Maco1	0.296009	0.000416509
Rap2b	0.291206	9.28756e-52		Atp9b	0.455657	4.7075e-39		Fam193a	0.319307	0.000426084
Cdc42ep4	0.302776	1.10068e-51		Dennd5a	0.348522	4.91655e-39		Prpf40a	0.261964	0.000441627
Slc25a30	0.273936	3.2024e-51		Cox17	0.266944	5.08168e-39		Vti1a	0.737801	0.000445423
Smim14	0.318707	6.08123e-51		Alcam	0.731989	5.58124e-39		Krit1	0.255565	0.000450539
Sat1	0.429826	6.45108e-51		Acer3	0.437161	6.4111e-39		Capza1	0.258036	0.00045372
Atp6v1d	0.319325	8.18971e-51		Lrp12	0.528411	7.09357e-39		Micu1	0.628602	0.000477509
Arl6ip1	0.291604	1.28815e-50		Spred1	0.582653	8.45295e-39		Baz2a	0.257282	0.000572375
Grk5	0.390395	1.53462e-50		Dse	0.301888	9.55708e-39		Tax1bp1	0.308327	0.000639755
Ttc7	0.341778	1.75586e-50		Elf2	0.575479	1.39432e-38		Tor1aip1	0.267669	0.000644124
Gak	0.297266	1.88219e-50		Pmaip1	0.277387	1.7314e-38		Tbl1x	0.436437	0.000705098
Fbxw11	0.368057	3.0959e-50		Tbc1d23	0.375304	1.96501e-38		Hnrnpc	0.307318	0.000743462
Ncoa3	0.303387	4.55839e-50		Sdhb	0.250223	2.39991e-38		Tspan14	0.341404	0.000773674
Vat1	0.337129	4.77474e-50		Actr2	0.413001	2.56387e-38		Far1	0.311352	0.000782543
Fkbp15	0.315114	5.75451e-50		Vps29	0.321762	3.15703e-38		Sh3pxd2b	0.276204	0.000834269
Tagln2	0.357163	5.93189e-50		Csrnp1	0.431836	3.18873e-38		Snx3	0.250227	0.000849796
Morc3	0.312617	7.79914e-50		Mapkapk2	0.51409	4.12143e-38		Tpm3	0.252295	0.000905547
Stk24	0.385155	7.83811e-50		Ppard	0.494171	4.67373e-38		Zc3hav1	0.369947	0.000938646
Wsb2	0.316775	1.05912e-49		Crtc3	0.437739	5.66758e-38		Wdr1	0.262715	0.000966353
Kmt5a	0.338128	1.12869e-49		Nsf	0.605509	6.01743e-38		Rps29	0.305337	0.00110992
Abcg1	0.393354	1.12968e-49		AU020206	0.275881	7.55923e-38		Ubxn7	0.361413	0.00112698
Ppp1r18	0.265405	1.13296e-49		Ap2b1	0.305956	8.58677e-38		Arih1	0.430178	0.00114798
Agap1	0.34346	1.24461e-49		Apba1	0.437433	9.10663e-38		Rab3gap2	0.267759	0.00119899
Clta	0.312773	1.97014e-49		Mecp2	0.38485	9.90787e-38		Macrod2	0.581383	0.00127227
Dgkd	0.34042	3.23061e-49		Dusp1	0.717732	1.18875e-37		Vps13b	0.424553	0.00130389
Tmcc1	0.407976	6.2329e-49		Xiap	0.386835	1.24016e-37		Runx1	0.860808	0.00130832
Ppp2ca	0.303558	1.10314e-48		Gcsh	0.300109	1.80292e-37		Atp6v0c	0.250526	0.0013983
Rassf1	0.36297	1.51636e-48		Atg2a	0.306566	2.19864e-37		Scp2	0.370197	0.00140442
Slc17a5	0.307408	2.17471e-48		Akr1b3	0.274334	2.34485e-37		Med13	0.281883	0.00157251
Nploc4	0.352864	2.20847e-48		Stx12	0.400013	2.49481e-37		Lmbrd1	0.26622	0.00157724
Gabarapl1	0.302673	2.33261e-48		Crybg3	0.465521	3.11675e-37		Rnf111	0.270136	0.00164595
Ern1	0.676406	2.63196e-48		Adam15	0.332244	5.58582e-37		Fosl2	0.292408	0.00164886
Rbm7	0.315473	3.2843e-48		Gda	0.445139	6.12126e-37		Ik	0.261223	0.00176502
Akap13	0.400549	3.31683e-48		Fbxo32	0.497863	6.6844e-37		Csnk1g1	0.28363	0.00189238
Bnip2	0.308498	3.39385e-48		Lamtor3	0.276605	7.49967e-37		Xiap	0.298034	0.00192618
Plec	0.340162	4.24647e-48		Ifih1	0.530561	8.34799e-37		Arid1b	0.303876	0.00202846
Pea15a	0.317255	4.2625e-48		Dennd4c	0.496214	9.93135e-37		Ash1l	0.257733	0.00219862
Zc3h12a	0.289765	4.49389e-48		Klhl24	0.38586	1.05626e-36		Erp29	0.270308	0.00227569
Dtx2	0.358092	5.29581e-48		Wdr26	0.415044	1.29062e-36		Rin2	0.726189	0.00236593
Relb	0.297122	6.23398e-48		Dyrk1a	0.451035	1.77701e-36		Rab3gap1	0.272225	0.00277716
Tfe3	0.285035	7.87701e-48		Gpx1	0.519276	2.89669e-36		Eps15	0.306763	0.00291871
Tmem256	0.307073	9.61402e-48		Scamp2	0.324914	2.98626e-36		Foxo1	0.319705	0.00300592
Ppard	0.409027	1.12186e-47		Nampt	0.292554	3.45131e-36		Mrpl52	0.269521	0.00323987
Prdm1	0.315372	4.34441e-47		Tgoln1	0.339778	3.88988e-36		Fchsd2	0.695302	0.00380302
Atp1b3	0.254771	5.04823e-47		Wdfy3	0.371406	4.73183e-36		Msn	0.302755	0.00397119
Evl	0.306098	5.85904e-47		Arfgef2	0.300337	4.8701e-36		Trafd1	0.294982	0.00492409
Cdk9	0.268674	6.45857e-47		Atp2b4	0.696961	4.99127e-36		Tnpo1	0.38898	0.00515817
Rnf13	0.296193	9.62223e-47		Mxd1	0.336093	5.31384e-36		Smurf1	0.48006	0.0052618
Pfn1	0.356536	1.32754e-46		Tgfbr1	0.44342	5.69439e-36		Tasor2	0.346354	0.00557511
Myof	0.378533	1.78942e-46		Morc3	0.313968	6.47097e-36		Vcp	0.294545	0.0056403
Nbr1	0.309258	4.34671e-46		Rara	0.265765	7.94394e-36		Anxa4	0.318869	0.00589146
Fnbp1	0.375222	4.91948e-46		Rhoq	0.35279	9.18594e-36		Epc1	0.319135	0.00614297
Slc36a4	0.254435	5.136e-46		Nipa2	0.37948	1.11911e-35		Rheb	0.258603	0.00718645
Qk	0.315354	5.26875e-46		Zfc3h1	0.555854	1.54388e-35		Rps19	0.357395	0.00734666
Atp6v1f	0.282511	7.28286e-46		Ubxn4	0.46788	1.88918e-35		Taldo1	0.366088	0.00743312
Crk	0.288997	8.04578e-46		Rps29	0.437164	1.90305e-35		Elk3	0.417697	0.00749906
Pisd	0.26553	9.74751e-46		Washc2	0.267298	1.91829e-35		Rb1	0.278397	0.00846827
Zmynd8	0.34917	1.72705e-45		Fnbp1	0.440298	2.22317e-35		Nrp2	0.738281	0.00954634
Washc2	0.266025	1.48598e-44		Celf2	0.257184	2.73058e-35		Kpna1	0.277136	0.00990719
Tpi1	0.314909	1.5538e-44		Vwa5a	0.315303	3.21859e-35		Ubb	0.363713	0.0104325
Ptprs	0.323047	1.72262e-44		Snhg15	0.320203	3.36166e-35		Ifitm3	0.652438	0.01064
Glud1	0.333473	2.30876e-44		Slc15a4	0.271845	3.7317e-35		Ncor1	0.252806	0.0107018
Htatip2	0.272369	2.45274e-44		Rab12	0.360184	3.78099e-35		Cpne2	0.255788	0.010804
Arfgef2	0.309433	2.71174e-44		Rab7	0.253899	4.2156e-35		Slc38a2	0.358532	0.0116121
1810013L24Rik	0.3197	3.123e-44		H2-T23	0.26214	4.68858e-35		B2m	0.296919	0.0126459
Marf1	0.400533	3.65463e-44		Wdfy1	0.305073	4.85573e-35		Trak1	0.255919	0.0150634
Ripk1	0.280782	4.08278e-44		Clic4	0.568396	6.75064e-35		Swt1	0.285133	0.0154052
Mier1	0.308217	4.25217e-44		Adam17	0.42768	7.00029e-35		Fnbp4	0.260556	0.0185226
Abhd17c	0.471559	4.45245e-44		H3f3b	0.521515	8.47691e-35		Fbxo34	0.421843	0.0200243
Vps26a	0.295555	6.02558e-44		Plekhg3	0.300804	8.60569e-35		Tcf20	0.259356	0.021038
Tollip	0.276626	8.64874e-44		Itga5	0.430073	9.95357e-35		Uba6	0.264376	0.0263145
Lemd2	0.263456	1.41328e-43		Ap2a2	0.448385	1.0487e-34		Ndrg1	0.436287	0.0263531
Actr3	0.305976	1.45841e-43		Scp2	0.318947	1.05445e-34		Kansl1	0.25184	0.02751
Nptn	0.304102	1.60429e-43		Vps41	0.324671	1.1256e-34		Fam172a	0.348506	0.0276502
Ago2	0.337144	1.65089e-43		Eaf1	0.321146	2.6351e-34		Parp14	0.261698	0.0286447
Rhou	0.332586	2.19917e-43		F10	0.626054	2.84643e-34		4932438A13Rik	0.254592	0.0303316
Klf13	0.356153	2.20489e-43		Pip4k2a	0.333616	2.94582e-34		Oaz1	0.265886	0.0306623
Stom	0.250916	3.01161e-43		Mcfd2	0.364461	3.05805e-34		Zmiz1	0.439463	0.0329825
Tmem30a	0.283358	1.23764e-42		Selenok	0.376499	3.50031e-34		Dnajc1	0.769287	0.0334862
Stag1	0.31008	2.68124e-42		Prdm1	0.42737	3.50598e-34		Gatad2b	0.354974	0.0405228
Nisch	0.336904	2.68915e-42		Coq10b	0.35048	3.51206e-34		Bbx	0.289645	0.041728
Ap2s1	0.317715	3.873e-42		Gak	0.293619	4.15292e-34		Mob3b	0.43231	0.0418094
Commd10	0.270144	4.04511e-42		Fam172a	0.426187	5.79242e-34		Map4k3	0.325799	0.0418256
Zfp652	0.336059	6.78474e-42		Ap1b1	0.360044	6.09759e-34		Ptbp2	0.289911	0.0482288
Dmxl1	0.457502	7.87609e-42		Apaf1	0.28663	6.18387e-34
Taok1	0.289183	9.6239e-42		Atp6v1e1	0.340063	6.73512e-34
Ccdc88a	0.329252	2.57768e-41		Prkd3	0.255135	7.97178e-34
Pbrm1	0.310932	3.26915e-41		Rffl	0.489025	2.05365e-33
Mapk3	0.266933	3.39294e-41		Mtmr12	0.326128	2.42836e-33
Ikbkb	0.275802	5.37977e-41		Man2a1	0.510806	2.70958e-33
Sgms1	0.271597	7.20499e-41		Oaz1	0.403446	2.8721e-33
Creb5	0.302271	1.73111e-40		Mindy1	0.269034	3.06185e-33
Dennd6a	0.325159	2.47742e-40		Jmjd1c	0.474796	4.64489e-33
AC149090.1	0.505692	2.61048e-40		Frmd4b	0.742769	5.88268e-33
Caprin1	0.291812	2.87318e-40		Lsm12	0.297338	7.6647e-33
Crebrf	0.366493	3.56447e-40		Fosl2	0.386176	8.0468e-33
Casp8	0.272183	4.39351e-40		Tet2	0.373273	8.26491e-33
R3hcc1l	0.278564	4.43177e-40		Erp29	0.31666	9.58485e-33
Dusp1	0.384656	4.46079e-40		Rab5b	0.277548	1.10605e-32
Ocrl	0.291641	4.73425e-40		Ccl6	1.16381	1.73808e-32
[truncated: 243 more rows]

## Sheet: FIBROBLAST
Supplementary file 4c: Differential expression table of genes for infected fibroblasts
[truncated: 1,122 more rows]

[truncated: 2 more sheets: ENDOTHELIAL, MISC.]
