# Supplementary material for: Decoding the complexity of delayed wound healing following Enterococcus faecalis infection
Source: eLife. 2024 May 20;13:RP95113. doi: 10.7554/eLife.95113 (PMC11105157; doi:10.7554/eLife.95113)
Supplement: Supplementary file 8. — Related to Figure 4. [file elife-95113-supp8.xlsx]

## Sheet: Table S8
Supplementary file 8: Differential expression table of genes for sub-clustered myeloid clusters
Related to Figure 4
Wilcoxon rank sum test run using the integrated dataset
seurat_cluster	Uninfected	Infected	Integrated		0				1				2				3				4				5				6				7				8				9				10				11
0	740	221	961		Gene	avg_log2FC	p_val_adj		Gene	avg_log2FC	p_val_adj		Gene	avg_log2FC	p_val_adj		Gene	avg_log2FC	p_val_adj		Gene	avg_log2FC	p_val_adj		Gene	avg_log2FC	p_val_adj		Gene	avg_log2FC	p_val_adj		Gene	avg_log2FC	p_val_adj		Gene	avg_log2FC	p_val_adj		Gene	avg_log2FC	p_val_adj		Gene	avg_log2FC	p_val_adj		Gene
1	227	452	679		Selenop	2.0284	3.30004e-289		Cacna1d	1.4085	4.75614e-87		Fpr1	1.4388	2.58326e-243		Gm42418	1.0198	1.21758e-120		Txn1	1.1213	1.29034e-106		Mast4	2.1399	3.29186e-209		Ccr7	3.5504	0		Plac8	2.4369	4.6014e-100		Cd209f	1.8149	0		Ifit2	2.9547	0		Cd207	4.5825	0		Clec9a
2	48	594	642		Fcrls	1.3493	2.37379e-288		Lrmda	0.8816	4.02148e-79		Cxcl3	2.1024	3.90188e-220		Cdk8	1.9666	1.32049e-112		Cav1	1.277	1.46436e-106		Efna5	1.8575	6.16549e-202		Ramp3	2.6578	0		Cd74	1.5215	1.06817e-83		Cd209g	1.1033	0		Ifit3	2.1435	0		H2-M2	3.7062	0		Itgae
3	487	96	583		Gas6	1.3278	9.6786e-255		Vegfa	0.8917	1.94724e-74		Il1a	1.9505	6.53328e-217		Ctsb	0.9224	3.45155e-60		Cxcl3	1.6574	1.02732e-104		S100a9	2.8357	3.26337e-183		Zfp366	2.5967	0		Ms4a4c	1.1601	2.34727e-83		C6	1.1202	5.65471e-241		Ifit1	2.4425	7.87064e-254		Scn3a	1.8265	0		Sema4f
4	172	288	460		Mrc1	1.6238	6.55884e-249		Arhgap24	0.9311	1.89409e-72		Cxcl2	1.8458	1.57472e-206		Lgmn	0.79	7.22005e-51		Mmp12	2.4749	1.35304e-103		Lgals7	2.3874	1.07101e-169		P2ry10	2.3005	0		Ly6i	0.654	7.06332e-83		Dnm1	1.4323	1.34515e-234		Ifi208	0.7637	8.75171e-233		H2-M5	0.7877	0		Gcsam
5	1	355	356		Hpgds	1.0306	2.8125e-237		Abca1	0.6814	4.2993e-67		Slc7a11	1.8567	1.71536e-201		mt-Co1	0.6391	4.46177e-44		Cd9	1.2897	1.41415e-98		Egfr	1.456	3.59115e-166		Flt3	2.0849	0		Tgfbi	1.5725	3.18704e-78		Lyve1	1.333	6.27594e-184		Ifi47	1.3528	2.62282e-230		Igha	0.7682	0		Gm49180
6	180	146	326		Itga9	1.5356	4.44814e-224		Junos	0.8591	6.84216e-65		Sod2	1.4469	2.73086e-194		Krt14	0.7129	1.35542e-42		Rnf128	1.1413	2.96434e-97		S100a8	2.2661	5.07858e-150		Klrb1b	1.9258	0		Cd52	1.2835	2.03057e-73		Kitl	1.7858	6.98233e-172		Cmpk2	1.5836	1.40104e-221		Hapln3	0.5367	0		Gm43914
7	107	200	307		Nrp1	1.1579	5.40225e-219		Lamc1	0.929	4.13519e-60		Itgb8	1.143	6.22112e-188		Nfkbia	0.7834	9.48612e-35		Vim	1.1318	2.76154e-92		Magi1	1.3012	6.79781e-147		Zbtb46	1.8946	0		Cytip	1.1804	5.84623e-71		Fcna	1.9422	2.04853e-169		Ifit3b	0.6549	7.17885e-206		P2rx2	0.4622	0		2003-09-01
8	38	48	86		Snx24	1.5792	8.92678e-217		Plin2	0.7418	2.79014e-59		Pid1	1.6091	1.49767e-187		Cebpb	0.7267	2.07259e-33		Met	1.1891	1.55976e-83		Cstdc5	1.9062	5.01622e-139		Klrd1	1.848	0		Havcr2	1.1442	1.47735e-67		C4b	2.1228	1.40999e-162		Ifi206	1.5816	2.48875e-191		Cyp4f37	0.5532	3.21047e-292		Rgs9
9	57	25	82		Itm2b	1.1241	7.69456e-211		Zdhhc14	0.8214	5.45816e-59		Slpi	2.1963	6.38335e-183		mt-Nd4	0.5861	7.73658e-30		Fth1	1.0289	4.5137e-83		Krt14	1.8161	5.25206e-137		Klri1	1.5551	0		H2-Ab1	1.3577	5.29839e-66		Coro2b	0.7409	2.4701e-157		Phf11d	1.2498	3.55464e-134		Stxbp5l	1.3794	2.27134e-251		Hepacam2
10	11	19	30		Wwp1	1.2991	1.46721e-201		Hif1a	0.6275	3.35253e-58		Cav1	1.5317	3.20777e-181		Grn	0.7721	1.87811e-29		Plpp3	1.3085	6.22528e-78		Perp	1.9359	3.11039e-135		Sema7a	1.3889	0		Ly6c2	1.3876	1.3648e-63		Fgfr1	1.607	1.20074e-150		Usp18	1.3352	1.98026e-132		1700030F04Rik	0.6263	7.9833e-244		Gpr82
11	13	14	27		Ms4a7	1.3211	2.60083e-193		Dock4	0.9208	5.21147e-57		Acod1	1.6596	3.37331e-179		Ctsl	0.9132	9.38084e-29		Prdx1	1.3589	9.66053e-76		Ebf1	1.3763	3.51479e-134		Klrk1	1.2971	0		H2-Aa	1.3785	2.9186e-60		Ppp1r9a	0.5871	1.26635e-150		Slfn1	1.6805	1.11615e-131		Syt9	0.7709	1.1211e-220		Ears2
					Slc9a9	1.3177	2.23799e-192		Thbs1	0.6868	7.96908e-57		Ptgs2	2.4952	4.62416e-175		mt-Co3	0.4726	4.01359e-28		Hmox1	1.3671	1.19392e-74		Krt10	2.3294	7.8664e-131		Siglecg	1.2622	0		Sema4d	1.0092	2.85759e-57		Tmod1	0.6521	1.3024e-149		Ifi213	1.8214	7.56639e-129		Gm26812	0.4906	5.69262e-218		Ipcef1
					C1qc	1.3346	6.32882e-192		Arg1	0.648	3.78924e-56		Ptges	1.7969	4.3797e-171		mt-Co2	0.4951	7.30433e-28		Tmeff1	0.6094	1.69927e-74		Igfbp7	1.5664	9.81448e-125		Mmp25	1.3978	1.43013e-297		H2-Eb1	1.2655	1.67155e-56		Cystm1	1.3253	4.71197e-97		Irgm1	1.2012	1.38352e-127		Osbp2	1.5911	8.85724e-217		Btla
					Cbr2	1.1496	3.57683e-184		Ctsl	0.5004	1.08424e-54		Arg1	1.6002	9.74443e-171		B2m	0.6044	8.43849e-25		Esd	0.8828	4.77122e-74		Tnc	1.7704	4.45597e-119		Dpp4	1.0266	8.81423e-297		Runx2	0.9075	3.53688e-53		Gpt2	1.3162	7.23793e-97		Igtp	0.7184	2.92192e-127		Lpar3	2.6438	1.76284e-206		Zdhhc23
					C1qb	1.409	1.01178e-182		Eepd1	0.6939	2.71045e-53		Pla2g4a	1.6753	1.75832e-168		Ccl7	1.3791	2.44835e-23		AA467197	1.5143	3.3157e-71		Krtdap	2.0501	6.9192e-119		Ccl22	2.6567	5.71571e-278		Tyrobp	0.8945	2.00587e-52		Stk39	0.688	1.59315e-93		Gbp3	1.0102	1.18795e-125		Cacna1e	2.8038	5.79119e-205		Cdon
					Psd3	1.3373	1.25931e-182		Peak1	0.7469	2.98955e-53		Met	1.5063	5.83504e-164		mt-Atp6	0.4364	1.16197e-22		Pcdh7	1.6132	2.89578e-70		Stfa3	1.8081	6.28802e-115		Tnfsf4	1.3859	1.7668e-268		Smox	0.9522	4.15173e-52		Ptprm	1.5017	1.79716e-84		Trim30c	1.0605	5.79535e-125		5830418P13Rik	0.6923	6.33788e-205		BC035044
					Pltp	1.1773	2.7394e-180		Lhfpl2	0.6762	1.1559e-51		Inhba	2.1957	7.57278e-158		Sdcbp	0.5009	2.42705e-22		Mmp8	1.3078	1.37438e-67		Sparc	2.8356	3.86589e-114		Cd209a	1.263	3.12803e-267		Plbd1	0.9174	4.73774e-49		Plekhg5	0.8029	7.83957e-79		Gbp2	1.6633	1.15033e-121		Tmem45b	1.0825	7.2545e-186		Gm36723
					Lgmn	0.9343	1.30241e-179		Airn	0.8504	3.73883e-51		Thbs1	1.3699	2.11138e-154		Krt10	0.5061	4.02012e-21		Arg1	1.075	4.01903e-66		Slit3	1.0965	2.1737e-111		H2-Oa	0.6247	1.76606e-262		Xylt1	1.1795	1.37013e-48		Reps2	1.5819	6.2334e-77		Rsad2	3.9068	1.14424e-113		Cacnb2	3.9012	2.75316e-183		H2-Ob
					C1qa	1.3025	2.01478e-177		Fbxo32	0.8084	6.81843e-51		Fn1	1.5094	1.78028e-147		mt-Nd3	0.733	8.15268e-21		Cstb	0.8222	1.6738e-65		Epha4	1.2023	3.42705e-108		Pdcd1lg2	1.646	1.80807e-262		Stap1	1.0457	8.50448e-48		Pros1	2.0177	4.71678e-76		A330040F15Rik	1.5256	1.85457e-105		Gck	0.3107	7.43473e-173		9130015A21Rik
					Ly86	0.9867	2.41449e-167		Zeb2	0.5371	4.98152e-48		Csf3	1.8009	9.27531e-129		H2-K1	0.6084	4.5469e-20		Slc7a11	1.0832	2.67856e-64		Pard3	1.0421	3.7472e-108		H2-DMb2	0.9611	9.46194e-260		Sorl1	0.7476	6.88378e-47		Cd163	2.4025	2.15533e-72		Rtp4	1.4396	2.62073e-104		St14	2.395	1.43295e-153		Palb2
					Frmd4b	1.2918	5.6015e-166		Cgnl1	0.7645	4.72781e-47		Nlrp3	1.306	9.33115e-128		Col1a1	0.3069	2.06587e-19		Prdx6	1.0757	5.10083e-63		Myo1d	0.9352	8.03821e-108		Rhof	1.0999	9.30212e-257		Fxyd5	0.7884	7.54231e-43		Maoa	1.46	1.41873e-67		Isg15	2.6134	7.35557e-103		Nbea	1.2322	1.00686e-149		Nup210
					Blnk	1.0898	1.32627e-163		Flrt2	0.8536	9.16861e-47		F10	1.1217	9.95787e-127		Ctss	0.5052	4.408e-19		Cav2	0.7687	1.33282e-61		Pcsk5	1.4834	1.86587e-107		Il1r2	3.0067	9.39272e-256		Fyn	0.8917	4.66881e-41		Fxyd2	1.4556	3.63295e-66		Ddx58	1.582	2.98272e-100		Pla2g5	0.4902	4.9998e-146		Ccser1
					Reps2	1.0127	1.72871e-159		Xdh	0.6445	2.02076e-45		Pdpn	1.1431	2.30535e-126		Selenop	0.3791	5.21132e-18		Sdc1	0.9122	6.14369e-61		Abca12	1.1053	1.52806e-106		Grasp	1.8158	1.26226e-255		Cyba	0.6969	1.76717e-39		Gas6	2.3235	8.71205e-65		Phf11b	1.2807	8.06731e-100		Gm10848	0.2975	9.51254e-138		Tg
					Bach1	1.1476	1.89924e-153		Cyth1	0.6428	3.27084e-45		Ccl3	1.8415	1.20419e-118		Lamp1	0.5069	6.53139e-18		Sgk1	1.3739	8.53279e-61		Mcc	1.0758	5.88355e-105		Kit	0.8946	2.06032e-249		Ccr2	1.0379	2.54933e-38		Adcy3	0.6716	9.01749e-65		Herc6	2.2287	1.20812e-97		Tcea3	1.2101	8.39134e-137		Card10
					Dclre1c	1.2171	3.52694e-152		Trim25	0.7163	5.23625e-45		Cybb	1.3594	9.56508e-117		mt-Nd2	0.5205	6.98943e-18		Aldoa	0.7392	8.94474e-61		Sfn	1.7908	1.75793e-103		Htr7	2.0596	1.61161e-239		Cd244a	0.6985	2.80513e-38		Cfh	2.3046	1.09967e-62		Zbp1	1.6932	1.24025e-94		Olfr111	0.4959	1.35877e-135		P2ry14
					Igf1	0.9161	2.38327e-150		Osbpl8	0.6047	6.73147e-45		Sema3c	1.2713	1.93346e-116		Mcl1	0.4257	1.87022e-17		Dusp4	0.5818	1.10511e-60		Wwtr1	0.9971	1.18277e-101		Gpr171	1.3533	3.03192e-234		Ifi27l2a	1.1434	4.67029e-38		Cpne8	1.0345	6.47373e-62		Xaf1	1.112	1.64798e-94		Atp8b1	2.8915	1.92376e-131		Gpr55
					Ccl8	2.0419	1.61711e-146		Dock7	0.6478	5.98499e-44		Fpr2	0.8433	4.57043e-115		mt-Nd1	0.4903	2.63337e-17		Jag1	0.916	1.55168e-60		Krt1	1.8375	7.97683e-100		Zeb1	2.5523	2.43307e-233		Runx3	0.5816	1.71222e-36		Colec12	2.0445	6.5705e-61		Oas3	1.5209	8.05077e-93		Dnal1	0.8767	4.27986e-128		Flt3
					Mir99ahg	1.2227	4.19781e-146		Gnptab	0.6254	6.57578e-44		Clec4d	0.9422	1.94566e-114		Mrc1	0.4584	4.72002e-17		Anxa2	0.9374	4.28595e-59		Col5a2	1.568	1.08471e-99		Stat4	3.2457	5.2606e-226		Fau	0.5665	1.9537e-36		Igf1	1.6292	3.0802e-59		Gm5431	0.6508	1.95702e-92		Plek2	1.6324	7.06836e-120		2006-09-01
					Ctsb	0.8309	4.41011e-146		Sh2b2	0.6573	6.97018e-44		Clec4e	1.2471	4.71699e-114		Junb	0.8006	5.16695e-16		Pgk1	0.9064	8.57508e-58		Dmkn	1.6081	7.18023e-98		Klri2	0.5066	8.30366e-226		H2-DMb1	0.7424	2.84335e-36		Ccl8	2.8485	1.66566e-58		Cxcl10	2.2774	6.04977e-90		Ahrr	1.3779	1.12003e-119		Kit
					Adgre1	0.8881	4.03255e-140		Lpar1	0.7037	2.34543e-43		Il1b	1.7847	5.10168e-114		Il10	1.5818	8.07305e-16		Ptges	0.9757	3.14546e-57		Krt16	1.6514	1.86942e-97		H2-Eb1	3.3467	3.7851e-224		Klra2	0.7381	1.54323e-35		Agmo	0.9899	2.69053e-56		Oasl1	1.9493	6.53224e-90		Egfl8	0.4581	2.31391e-116		Cd226
					Serinc3	0.8444	1.97777e-139		Map3k20	0.6942	1.96312e-42		Prdx5	1.1463	1.46588e-112		Krt1	0.6484	8.13639e-16		Cd24a	1.0548	1.33323e-54		Col3a1	2.98	7.74847e-97		Gpr183	2.4028	1.87531e-216		Srgn	0.7392	4.50245e-35		Fcgrt	2.1702	5.39032e-55		Stat2	1.5873	1.14199e-87		P2rx5	0.3735	2.95668e-116		Ank1
					Slamf7	1.0201	3.79915e-138		Pitpnc1	0.8709	2.10325e-42		Vcan	1.0411	6.43858e-112		Psap	0.4607	8.26605e-16		Pkm	0.6553	5.44133e-53		Ptpn13	1.0771	9.03573e-94		H2-Eb2	0.751	4.54102e-215		Lmnb1	0.7901	5.27988e-35		Cd209d	0.9311	5.25489e-53		Oasl2	2.0749	7.89499e-86		Gm13269	0.3454	2.47512e-112		Itga3
					Fcgrt	0.8248	4.94283e-137		Klhl2	0.7599	2.6689e-42		Tnfrsf9	1.3678	7.97596e-108		Serpinb6a	0.7706	2.2097e-13		Pgam1	0.7646	9.33755e-53		Dsc3	1.4678	4.20093e-92		H2-Aa	3.2875	3.70338e-213		Rps13	0.6112	7.10614e-35		Npl	1.078	2.21698e-51		Gbp7	1.452	2.48978e-85		Ly75	2.6647	1.0098e-106		Clec1a
					Pdgfc	0.9313	1.29774e-133		Igf2r	0.5185	3.51023e-42		Itga1	1.039	5.40879e-106		Col3a1	0.3257	4.16041e-13		S100a6	0.8347	1.88095e-52		Serpinb2	1.5001	1.28632e-90		Il4i1	1.5114	1.81686e-212		Traf1	0.7891	8.87067e-35		Tns1	1.7066	2.59969e-49		Trim30d	1.8109	1.23246e-76		Fam189a2	0.8917	1.12098e-105		Gm15964
					Snx5	0.9547	1.07916e-129		Rbms1	0.427	1.80918e-41		F7	0.7157	1.50276e-105		Col1a2	0.5651	1.14413e-12		Cd36	1.0388	4.02394e-51		Serpinh1	1.4119	2.03216e-90		Serpinb6b	1.5858	9.38881e-211		Plaur	0.7046	6.06426e-34		Rasgrp3	0.4119	3.90783e-49		Gm12185	0.6849	1.84518e-73		Chsy3	1.1154	7.3683e-100		Bcl2l14
					Lpl	1.0901	1.81635e-126		Dennd4c	0.69	5.99085e-40		Plekhm3	1.0297	2.19066e-105		Ptprj	0.5407	3.40345e-11		Anxa5	0.6589	4.227e-51		Krt17	1.718	3.05228e-90		Aff3	2.4156	2.61911e-208		Napsa	0.552	1.18536e-33		Prkn	1.0766	6.05083e-49		9930111J21Rik2	1.0097	2.34888e-73		Sema6d	1.9203	1.89327e-96		Arl6
					Abca9	0.5592	1.69619e-123		F13a1	0.5519	1.47779e-38		Clmp	1.445	3.04792e-103		mt-Cytb	0.3575	1.72706e-10		S100a10	0.7516	4.97765e-51		Fstl1	1.5374	1.3874e-88		Il2ra	1.3401	7.1846e-207		Ccr5	1.0306	1.77365e-33		Timp2	2.3346	3.08038e-48		Ifi209	2.3332	1.16932e-72		Rnf43	0.7037	8.56205e-94		4931406G06Rik
					Apoe	0.9425	3.77307e-122		Clec4d	0.5278	4.00049e-38		Tnfrsf1b	0.9897	2.25074e-102		Zfp36	0.7103	2.68793e-10		Lgals3	0.7029	6.22112e-50		Rps2	1.076	1.65199e-87		Strip2	1.3243	3.74099e-205		Rpl18	0.6031	6.97271e-33		Ctla2b	0.9615	3.72293e-48		Oas1g	0.5174	1.32319e-72		Xlr	1.0546	5.49291e-90		Klrk1
					Ccl12	0.8748	1.14176e-119		Maml3	0.7892	5.81289e-36		Ier3	1.2844	3.90832e-102		Fchsd2	0.8507	7.10863e-10		Slc25a37	0.7138	2.61538e-48		Ptprg	0.8211	2.86333e-87		Myo1g	1.9282	4.25811e-198		Lgals3	0.7171	2.42352e-32		Alox5	0.5922	5.86626e-48		Irgm2	0.7029	1.67622e-72		Tespa1	0.3378	2.96739e-88		Klrb1b
					Pla2g15	0.5975	6.58451e-119		Dgkz	0.5385	7.6012e-36		Abcc1	0.9425	1.31911e-97		Ahnak	0.3143	1.36605e-09		Clmp	1.1407	9.36101e-47		Col1a1	3.1316	3.02168e-87		Cd74	3.1634	7.84597e-197		Ifi30	0.7609	3.44592e-32		Chp2	0.3996	8.92658e-47		Gbp5	1.0712	4.13131e-71		F2rl2	0.3151	7.56779e-87		Dpp4
					Hdac9	1.1246	7.05465e-119		Fmnl2	0.6495	1.85224e-35		Wfdc21	1.049	2.17655e-97		Cbr2	0.6484	1.80111e-09		Adam8	0.7714	1.11746e-46		Meg3	1.435	5.35883e-87		Dapp1	1.9805	9.4249e-191		Bach2	0.9329	1.51657e-31		Pdgfc	1.5117	4.51024e-45		Slfn9	0.6395	1.10552e-69		Mfge8	5.1918	2.84644e-85		Gm48236
					Pparg	0.9105	1.31315e-118		Dmxl2	0.5338	3.65352e-35		Slc7a8	0.9658	3.30787e-96		Cflar	0.5845	6.58708e-09		Gsr	0.8561	3.11118e-46		Krt77	2.2514	1.37602e-86		Cbfa2t3	1.4552	2.14752e-188		H2-DMa	0.5727	3.91536e-31		Slco2b1	0.5788	2.05265e-44		Gm4070	0.8097	3.17483e-67		Fads3	0.9354	9.99009e-85		Gm28100
					St6gal1	0.7534	1.97881e-116		Malat1	0.5026	2.66233e-34		Gramd1b	1.8416	4.05103e-96		Krt16	0.5961	8.61133e-09		Capg	0.6957	4.6915e-45		Krt5	1.6282	1.46681e-86		Samsn1	2.7789	2.9279e-188		Rpl32	0.6329	8.65825e-30		Uaca	0.4336	1.3624e-43		Parp12	1.3258	1.51518e-66		Trp53i11	0.7179	1.15487e-84		Med12l
					Zdhhc14	1.074	4.10305e-116		Ppp1r12b	0.6634	7.06104e-34		Sgms2	0.9217	8.33645e-96		Timp2	0.5952	1.58743e-08		Morrbid	0.8088	5.71284e-44		Col4a1	1.0771	3.50357e-86		Plscr1	1.3742	4.47194e-185		Rpl34	0.5711	1.34525e-29		Thrb	0.516	3.6661e-43		Ddx60	1.9976	1.21464e-64		Epcam	2.926	2.19598e-84		Lzts1
					Folr2	0.8055	6.14298e-116		Fnip2	0.5621	7.7644e-34		Irak3	0.9709	9.52978e-96		Frmd4b	0.5557	3.84331e-08		Tagln2	0.7142	3.36027e-42		Tgfbr3	0.7766	5.74761e-86		H2-Ab1	3.2909	6.75436e-185		Rpl10	0.5844	1.28323e-28		Cp	0.4704	3.85296e-43		Gbp9	0.5253	2.0861e-63		2003-09-01	0.6119	3.05875e-83		Scin
					Unc93b1	0.7378	2.6177e-115		Rai14	0.6234	1.81256e-33		Hilpda	0.9378	5.22088e-95		Rsrp1	0.5201	3.50968e-07		Ctsk	0.9823	5.32966e-42		Cald1	1.2435	4.36165e-85		Il18rap	0.9286	8.75614e-183		Rps16	0.5171	2.01107e-28		Rasal2	1.1683	6.68477e-43		Phf11a	0.4916	2.04136e-62		Tspan8	0.6456	6.31651e-82		Gpr171
					Daglb	0.6146	9.70379e-115		Apobec1	0.7581	5.00447e-33		Jag1	0.9259	1.9406e-93		Tns1	0.5874	3.52749e-07		Creb5	0.7809	7.3815e-42		Calm4	1.6561	5.65929e-85		Tmtc2	3.0673	9.66846e-183		Tmsb4x	0.4722	2.60235e-28		Serpinb6a	1.934	8.11755e-43		Trim30a	2.2523	1.69909e-60		Scin	2.2533	3.64667e-78		P2ry10
					Nceh1	0.8693	1.52067e-113		Plcb1	0.6442	4.94237e-31		Plcb1	1.3526	1.20259e-88		C1qa	0.4586	1.64051e-06		Kcnn4	0.7113	2.4055e-41		Nfib	1.0598	1.35579e-81		Rtn1	0.8411	4.52436e-178		Smchd1	0.8496	2.95863e-28		Sgpp1	1.0219	1.44447e-42		Rnf213	2.5802	4.1262e-60		Fads2	0.5097	5.34974e-77		Slc25a38
					Tex2	1.0677	2.30904e-113		Fn1	0.5266	6.37409e-31		Hp	0.9092	1.25498e-88		Laptm5	0.3433	1.7073e-06		Abcc5	0.7753	4.5399e-40		Rplp0	0.9517	1.55071e-81		Dennd3	0.6779	1.69434e-175		Coro1a	0.6822	2.97967e-28		Cd81	1.2815	1.64884e-42		Parp14	2.4065	9.59683e-59		Gabbr1	0.767	2.65163e-76		Gm42962
					Nxpe5	0.6126	2.3464e-112		Tmem87b	0.4937	8.94648e-30		Mir155hg	1.1265	1.48424e-87		Ccl2	1.0202	2.32994e-06		Nt5e	0.6315	1.00696e-39		Clca3a2	1.6258	1.40568e-80		Ciita	1.0236	6.17006e-175		Gngt2	0.6761	3.30539e-28		Zcchc14	0.5591	2.73856e-42		Ms4a4c	2.1406	1.30392e-58		Adam23	1.3266	5.79167e-76		5830428M24Rik
					Snx9	0.952	1.76831e-111		Rreb1	0.5571	1.02424e-29		Rffl	0.86	1.14075e-86		Btg1	0.2933	3.53766e-06		Gapdh	0.6718	2.29579e-39		mt-Cytb	0.9957	3.97012e-80		Gins3	0.5404	1.95499e-171		Rpl9	0.5354	8.3524e-28		Kank2	0.5079	3.34146e-42		Dtx3l	1.1337	1.35226e-58		Traf4	0.6702	4.23643e-73		Tbc1d10c
					Fosb	0.9213	7.66852e-109		Apoe	0.4904	1.97066e-29		Arg2	0.9047	3.87817e-84		Ctsd	0.4089	6.03119e-06		Sema3c	0.7695	5.8204e-39		Cstdc4	1.07	1.68932e-79		Arhgef10	0.9203	2.19048e-171		Rps18	0.5752	1.81704e-27		Pmp22	1.572	3.92877e-42		Helz2	0.8663	7.06872e-58		Zfp366	1.6274	3.22177e-72		Cyfip2
					Sfmbt1	0.9202	1.02184e-107		Cmss1	0.4803	7.55828e-29		Upp1	0.5219	4.30012e-84		F13a1	0.284	8.25901e-06		Gclm	0.9647	7.53942e-39		Ly6d	1.5542	3.12093e-79		Mrtfa	2.4721	8.21875e-170		Ifitm1	0.713	8.07364e-27		Slc40a1	0.914	1.31105e-39		Tor3a	1.2333	7.29579e-58		Ocln	1.0498	1.22203e-70		Lrrc1
					Timp2	0.7148	3.56925e-107		Pdpn	0.5315	1.17244e-28		Mmp14	0.8211	2.49826e-83		Spp1	0.2898	1.27074e-05		F7	0.5067	8.23911e-39		Pakap.1	0.8273	4.75611e-79		Mreg	2.7426	1.86229e-169		Csf2rb	0.6242	1.33463e-26		Wfdc17	3.0488	2.72514e-39		Slfn5	2.3233	1.44395e-57		Tjp1	1.67	5.02151e-70		Htr7
					Stab1	0.8384	3.14005e-106		Vav3	0.4552	2.3256e-28		Hipk2	1.2795	1.47061e-82		Gm14636	0.7588	2.19185e-05		Itgb2	0.7254	8.61667e-39		Rbms3	0.9422	5.6476e-79		Tmem120b	1.2711	2.62391e-169		Fcer1g	0.5266	2.67986e-26		Cnrip1	0.5811	1.39548e-37		Oas2	1.0909	2.36523e-57		Fgf13	1.8299	4.45251e-69		Gm13561
					Rab3il1	0.4605	1.21737e-105		Atxn1	0.5153	2.60252e-28		Cyb5a	0.903	2.7041e-82		Dennd1a	0.3877	2.41982e-05		Itgb7	0.625	1.22053e-38		Col1a2	2.5433	6.98696e-79		Stat5a	1.6336	1.11954e-166		Atox1	0.5889	4.81023e-26		Folr2	1.5685	3.94697e-36		Parp9	1.39	2.52464e-57		Acap1	0.6394	6.83593e-69		Haao
					Arhgap19	0.4513	3.64273e-105		Sestd1	0.4869	2.90913e-28		Abcc5	0.9465	5.21098e-82		Ednrb	0.4863	2.44863e-05		Neat1	0.7187	1.29171e-38		Sbsn	1.8075	2.42458e-78		Gm7247	1.0418	1.27745e-166		Epb41l2	0.5691	1.61624e-25		Aldh7a1	0.5608	7.05026e-36		Samd9l	1.3562	3.54396e-56		Cldn1	3.0433	2.042e-67		Spata32
					Clec4a3	0.6975	3.38137e-104		Mafb	0.6395	7.00786e-28		Tnf	1.3003	4.24203e-80		Ccl6	0.7715	0.000119647		Cyb5a	0.7703	1.46171e-38		Dsp	1.4279	5.76639e-78		Itgax	0.7762	3.09218e-166		Rps7	0.5356	1.6631e-25		C1qa	1.7035	7.80281e-36		Dhx58	0.6603	9.07067e-56		Yes1	1.4213	4.28666e-67		Plet1
					Prkcb	0.7508	5.59926e-103		Kcnk13	0.6007	7.06803e-28		Ets2	0.8338	5.0383e-80		Ddhd1	0.7937	0.000447181		Mtpn	0.6575	1.63021e-38		Dcn	1.7539	2.06839e-77		Prr5l	1.3391	4.17108e-164		E230029C05Rik	1.1215	2.07661e-25		C1qc	1.6836	3.80913e-35		Stat1	1.8071	2.53917e-55		Slc36a2	0.7773	1.18868e-66		Wnt11
					Maf	0.943	4.29063e-102		Xylt1	0.489	2.52254e-27		Cd14	0.9151	1.85009e-78		Krt6a	0.5991	0.000511851		Prr13	0.8046	1.7016e-38		Rps20	0.8818	3.0589e-77		Cytip	2.2648	1.17573e-162		Rpl11	0.4965	4.13859e-25		Ctsb	1.4131	5.96077e-35		Nt5c3	0.8476	6.56074e-55		Slc7a5	0.9885	6.51863e-66		Gm10974
					Arhgap15	0.8648	2.07238e-100		Ctss	0.3423	2.8609e-27		Ikbke	0.7591	5.07743e-77		Arhgap10	0.3573	0.000657089		Mmp13	1.7987	3.44446e-38		Cdh13	0.9193	1.16172e-76		Gm17276	1.6575	2.57072e-162		Rps3	0.5154	5.05676e-25		Cela1	0.8639	6.11241e-34		Tap1	1.1551	2.47747e-54		Aff3	1.5728	1.79819e-64		Ildr1
					Itsn1	0.8482	2.47405e-99		Klhl24	0.409	3.6341e-27		Ero1l	0.8031	6.86948e-77		Sash1	0.4239	0.000729185		Junos	0.6372	3.95308e-38		Bgn	1.5511	1.67955e-76		Ust	1.8369	6.61822e-161		Rplp0	0.5336	6.81688e-25		Abcd4	0.5924	7.7573e-34		Ifih1	1.8695	3.35465e-54		Ccser1	2.3176	9.56938e-64		Oprm1
					Pxn	0.7455	4.74134e-99		Uhrf2	0.6728	3.93481e-27		Prdx6	0.957	9.11989e-77		Fcgrt	0.4894	0.000972154		Agbl3	0.3968	1.5438e-37		Rpl13a	0.853	2.53155e-76		Tspan13	1.5898	7.76697e-160		Ms4a6c	0.6414	9.8797e-25		Selenop	2.1762	4.92566e-33		Gvin1	0.8631	3.24119e-53		Cass4	1.4968	8.05354e-63		Dbn1
					Ckb	0.5644	3.28655e-98		Camk1d	0.6294	4.24058e-27		Rab11fip1	0.8373	1.44042e-75		Gas7	0.5122	0.00189726		Pdpn	0.6026	6.83461e-37		Nhsl1	0.8151	1.5731e-75		Phlpp1	2.9412	7.5495e-158		Spag9	0.5268	1.96386e-24		Tenm4	0.8541	1.03391e-32		Znfx1	1.5083	3.03692e-51		H2-DMb2	1.3925	1.22197e-61		Pdcd1lg2
					Aif1	0.8248	4.72915e-98		Ppm1h	0.699	5.12805e-27		Cav2	0.6947	2.78744e-75		Wwp1	0.3829	0.00252883		Fn1	0.8862	1.85532e-36		Rps12	0.8021	7.45215e-75		Rogdi	0.7442	2.0267e-156		Ifitm3	0.9443	4.86005e-24		F13a1	1.4895	1.04347e-32		Isg20	0.7091	3.36033e-51		St8sia1	0.7203	1.54182e-61		Adam19
					Tgfbr2	0.6499	2.16902e-96		Fndc3a	0.5338	7.12636e-27		Flrt3	0.9504	2.91754e-75		Tnfaip2	0.5627	0.00431258		Msr1	0.6648	1.88337e-36		Aebp1	0.9084	2.96262e-74		Gpr55	0.6682	8.11573e-156		Tspan13	0.4458	5.07595e-24		Fam110b	0.3987	1.21562e-32		Calhm6	0.5231	1.01306e-49		Map2	1.4229	3.48806e-61		Klrd1
					Inpp5d	0.8177	2.2129e-96		Cux1	0.4037	7.58766e-27		Phlda1	1.0954	6.66622e-75		Krt6b	0.6455	0.00833715		Tmem43	0.6124	4.84848e-36		Actb	0.7498	1.3274e-72		Map3k14	2.6348	2.49638e-155		Rps10	0.5009	1.11302e-23		Aplp2	1.3694	2.90336e-32		Ifi35	0.9403	5.21507e-49		Unc5b	0.44	5.15633e-61		Adgrg5
					Man1a	0.9078	1.22243e-95		Slc16a10	0.5908	1.20109e-26		Ptpre	0.8758	8.70073e-75		Gpnmb	0.3682	0.00936397		Bst1	0.6421	9.60496e-36		Enah	0.972	6.05007e-72		Ctnnd2	1.0393	7.59165e-151		Calm1	0.5964	1.39694e-23		Cbr2	1.5352	2.58222e-31		Ifi204	2.1993	1.14846e-48		Vash1	0.4275	7.43474e-61		Gm26827
					Ptpn18	0.7675	4.22659e-95		Nt5e	0.5108	1.34323e-26		Eml1	0.8787	9.64988e-75		Sirpa	0.3574	0.00956816		Grina	0.6432	2.23485e-35		Prrx1	0.864	1.14179e-71		Dnah2	0.9425	3.31883e-150		S100a4	0.656	2.20122e-23		Sulf2	1.0542	3.80112e-31		Mndal	2.1985	3.84254e-48		Afap1l2	0.6138	3.34757e-60		Ubfd1
					Rnf130	0.698	7.60577e-95		Bend4	0.5057	1.60017e-26		Hif1a	0.7355	2.34028e-74		Rap1b	0.2637	0.0110072		Ldha	0.6672	2.47214e-35		Cdh1	1.4416	4.63053e-71		Fyn	2.2367	4.8628e-150		Rpl26	0.4826	2.21524e-23		Sh3bgrl2	0.7427	6.41473e-31		Trim34a	0.6628	8.0368e-47		Sox5	2.0739	7.83269e-60		Gstp3
					Dhrs3	0.6989	8.66095e-95		Adam8	0.4317	2.01258e-26		Marcksl1	0.9625	2.48898e-74		Pabpc1	0.4336	0.0447538		Il7r	0.6702	1.30681e-34		Cxcl5	1.106	1.90398e-70		Cmtr1	1.6154	5.75511e-150		Vps37b	0.8588	2.29965e-23		Ednrb	1.6999	6.54863e-30		Sp100	1.7083	1.72853e-46		Ttll7	0.3607	1.10661e-59		Gm10552
					Ern1	1.1048	1.08775e-93		Gab2	0.3614	2.91787e-26		Abhd17c	0.8152	1.42914e-73						Cxcl2	0.6014	2.62555e-34		Slpi	1.2264	2.88281e-70		H2-Ob	0.4479	2.7702e-149		Rps27a	0.5221	3.07894e-23		Hdac9	1.2377	1.82794e-29		Irf7	1.8467	2.87652e-45		Plcd3	0.5402	1.52552e-59		Kmo
					Dennd1a	0.7284	2.05568e-93		Lpin2	0.5981	4.59588e-26		Cxcl1	1.9381	2.52152e-73						Crip1	0.9665	8.64085e-34		Rbfox2	0.7647	5.51653e-70		Grk3	1.5826	1.96078e-147		Rpl23	0.4547	3.13314e-23		Ctsd	1.3908	4.61858e-29		Ifi211	1.9521	4.5693e-45		Hectd2	0.7304	2.07224e-58		Nlgn2
					Cerk	0.6872	7.39091e-93		C3ar1	0.4249	8.75664e-26		Cd9	0.7432	4.64063e-73						Aprt	0.6463	2.84588e-33		Il6	1.2663	1.60103e-69		Gm20513	0.4822	1.26705e-146		Bcl2l11	0.7219	3.40435e-23		Grn	1.2285	5.00368e-28		Il15	1.421	6.43985e-45		Frk	0.6808	5.665e-58		Gm50069
					Man1c1	0.6974	3.97728e-92		Gnaq	0.3888	1.65995e-25		Mapkapk2	0.7981	1.47478e-72						Slpi	0.8543	3.47658e-33		Fabp5	0.9933	2.82335e-69		Satb1	1.6365	4.10945e-145		Rps15a	0.4889	7.06382e-23		Gprc5b	0.3732	5.5839e-28		Eif2ak2	1.062	3.89531e-44		Ctnnd2	2.3482	1.04955e-55		Gm38115
					Dmxl1	0.847	4.82092e-91		Cxcr4	0.4825	3.23463e-25		Grina	0.7124	8.27495e-72						Pfn1	0.5146	9.01687e-33		Sh3d19	0.9366	6.2293e-69		Fam129a	1.7727	6.26202e-144		Csf2ra	0.4805	1.29989e-22		Clec10a	1.6739	1.08402e-27		Ube2l6	0.7286	4.33039e-44		Rtn1	1.8654	1.29914e-55		Plet1os
					Pld4	0.6413	7.76102e-91		Cd84	0.4652	3.47527e-25		Bst1	0.7289	1.24394e-70						Myadm	0.6853	2.27443e-32		Nckap1	0.9195	1.99202e-68		Cacnb3	1.3342	8.72393e-144		Rpl19	0.452	1.45324e-22		Nrp1	1.171	5.06249e-27		Ifi203	1.8344	1.26652e-43		Grap2	0.9851	2.10848e-55		Klri1
					Ap1s2	0.679	1.30482e-90		Sntb2	0.5759	6.79162e-25		Fam20c	0.7997	9.88387e-70						Flna	0.6987	4.94981e-32		Rpl28	0.8677	7.84053e-68		Ifitm1	3.348	9.39479e-144		Sh3bgrl3	0.5378	2.13769e-22		Etv1	0.9107	1.61924e-26		Slfn8	1.4267	2.33276e-43		Alox5	1.378	3.86354e-55		Ccdc167
					Mtmr10	0.8556	2.76937e-90		Rcbtb2	0.4757	1.14298e-24		Pcdh7	1.3808	2.02213e-69						Plekhg1	0.5059	9.08743e-32		Mfap5	0.8856	1.39459e-67		Tmem39a	1.7249	6.25519e-139		Sirpb1c	0.4234	2.35099e-22		Egfr	0.7109	1.70132e-26		Tpst1	0.5079	4.8763e-43		Tcaf1	0.2852	1.14443e-50		St3gal5
					Scamp5	0.3034	2.84013e-90		Pam	0.5143	2.02937e-24		Mirt2	0.4535	4.95008e-69						Gpx1	0.8783	2.32046e-31		Rpl12	0.9464	1.48983e-67		Bcl2a1d	1.714	1.05711e-137		Taldo1	0.582	2.66303e-22		Ccl6	2.0239	4.26001e-26		Oas1a	0.8302	9.4974e-42		Cadm1	1.3725	2.72042e-49		Sla
					Fgl2	0.8233	7.86594e-90		Lars2	0.4404	2.2529e-24		Cpd	0.7244	2.8082e-68						Cpd	0.6251	5.52964e-31		Fam135a	1.1375	3.70345e-67		Rel	1.925	2.2307e-137		Cd14	0.7178	3.06237e-22		Arhgef3	1.557	7.04694e-26		Trafd1	1.2095	1.54977e-41		Ciita	2.1166	3.78775e-49		Sdcbp2
					Rnase4	0.6532	9.55411e-90		Rbm47	0.3918	2.96656e-24		Ccl9	0.8527	2.49623e-67						Btg1	0.5144	5.93427e-31		Rpl41	0.67	8.78856e-67		Zbtb18	1.4202	8.0555e-137		Isg15	0.7291	3.23077e-22		Glul	1.4396	8.69266e-26		Themis2	0.6786	3.987e-41		Pgf	1.843	5.31436e-48		Rab27a
					Dgkd	0.7966	4.05014e-89		Dennd1a	0.401	6.78089e-24		Gsr	0.7434	2.5465e-66						Glul	0.7472	6.06914e-31		Serpinb5	1.1576	1.43723e-66		Nr4a3	2.739	1.19572e-136		Il1b	0.9098	3.90926e-22		Eps8	1.7819	2.53224e-25		Sass6	0.6905	4.2715e-40		Slc16a14	0.5906	7.78019e-47		Tnni2
					Tmem176b	0.7219	1.62384e-88		Grk5	0.6642	1.04687e-23		Pf4	0.9247	1.2846e-65						Flrt2	0.594	1.95273e-30		Rps18	0.9098	2.36296e-66		Stk38l	1.4013	1.42103e-136		Cdk2ap2	0.4692	4.60118e-22		Mrc1	1.3919	3.66916e-25		Fcgr1	1.7538	4.90122e-39		Dlg5	0.5121	9.96214e-47		Chsy3
					Gdf15	0.8272	4.7302e-88		S1pr1	0.3383	1.2909e-23		Abr	0.8643	2.03824e-65						P2ry10b	0.4814	3.68869e-30		Klf5	0.9902	1.16282e-65		Cd80	2.1208	8.29064e-136		Axl	0.333	5.24317e-22		Idh2	0.7938	8.47412e-25		Mitd1	0.5353	1.46353e-38		Fam135a	2.2206	2.13985e-44		6030468B19Rik
					Epb41	0.8393	3.05069e-87		Trps1	0.5416	1.38023e-23		Ampd3	0.7396	3.30258e-65						Gadd45a	0.502	4.99521e-30		Serping1	1.0623	6.08404e-65		H2-DMb1	1.3405	1.18207e-132		Ifnar2	0.6024	6.67714e-22		Wwp1	1.3881	1.31311e-24		Zup1	1.1149	3.12906e-38		Ninl	0.2569	2.70942e-44		Ctse
					Kras	0.8354	1.21744e-86		Fmn1	0.462	1.48118e-23		Ell2	0.7517	6.03899e-65						Hsph1	0.6552	5.71891e-30		Irf6	0.9677	1.44177e-64		Nectin1	1.0435	1.32831e-132		Rps14	0.4333	7.53629e-22		Cd36	1.7659	2.4198e-24		Parp11	0.9073	3.18042e-38		Rhof	1.7163	7.27801e-44		Ppm1m
					Clec12a	0.5876	2.41911e-86		Rassf2	0.4262	2.4038e-23		Rai14	0.7506	2.23673e-64						Egln3	0.7405	1.136e-29		Rarres2	1.5698	5.95851e-64		Snhg15	1.0424	1.53148e-132		Mmp19	0.9803	9.85245e-22		mt-Co1	1.1606	2.55565e-24		Scimp	0.336	1.54735e-37		Pxdn	0.7874	7.37721e-44		Afap1
					Igfbp4	0.6464	5.62687e-86		Gphn	0.3776	1.64757e-22		Tarm1	0.587	2.34277e-62						Anpep	0.5458	2.134e-29		Rplp1	0.6783	2.57278e-63		Lrrk1	1.9077	5.66063e-131		Itgal	0.4802	1.2301e-21		Tgfbr2	1.086	3.88205e-24		Daxx	0.9248	3.23135e-37		Hook1	0.3807	2.14164e-43		Slc25a20
					Gpr65	0.5199	9.87217e-86		Tbc1d9	0.5451	5.53619e-22		Plpp3	1.0236	2.38968e-62						Dst	0.7378	2.36508e-29		Krt6a	1.1992	4.22081e-63		Serpinb9	1.3937	2.15744e-130		Rps19	0.4633	1.25901e-21		Tmem8	0.8983	4.12527e-24		Epsti1	1.867	1.06705e-36		Atp2a3	0.276	8.65159e-43		C130026I21Rik
					Stard9	0.6622	1.09769e-85		Zmiz1	0.3597	1.13184e-21		Spp1	0.941	9.90984e-62						Ptgr1	0.7566	2.40602e-29		Gpx3	1.1514	9.24837e-63		Lnx2	1.0674	4.50322e-129		Rpl27	0.4743	1.43393e-21		Tcim	0.7689	4.50116e-24		Slc25a22	0.4582	2.61888e-36		Pxdc1	3.0149	1.00861e-42		Asap2
					Zfp704	0.6318	2.04938e-85		Ankrd28	0.473	1.84905e-21		Pgk1	0.6565	2.24063e-61						Ctsl	0.9003	5.86547e-29		Rps26	0.7851	1.78512e-62		Ocstamp	0.649	1.00249e-125		Apobec1	0.7957	2.16417e-21		Dip2c	1.0541	5.2079e-24		Dck	0.925	1.99231e-35		Stac	0.775	1.05773e-42		Acap1
					Pdxk	0.4996	4.25345e-85		Snx13	0.4599	3.27822e-21		Itgam	0.6156	1.38098e-60						Degs1	0.5558	1.04794e-28		Trp63	0.8607	7.15852e-62		Pgf	0.942	2.73992e-124		Diaph1	0.5098	2.58784e-21		Tanc2	1.2852	1.11682e-23		Trim14	0.8771	2.89762e-35		Unc13b	0.5502	4.00608e-42		Satb1
					Mef2c	0.7142	1.04166e-84		Nav2	0.6073	7.70568e-21		Lcp1	0.5873	4.195e-60						Tpi1	0.565	2.3725e-28		Rps8	0.7534	2.62343e-61		Traf1	2.1573	2.83853e-124		Arhgap26	0.8936	4.17674e-21		Lrp6	1.2149	2.45171e-23		Slfn4	1.9194	3.07587e-35		Dexi	1.0034	8.22892e-42		Timd4
					Slc38a1	0.7939	5.83093e-84		Arhgap10	0.4484	9.46397e-21		Fmn1	0.7922	5.45392e-60						Pgd	0.6272	2.54952e-28		Cxadr	1.0218	8.14332e-61		Napsa	1.2307	6.28063e-123		Rpl28	0.4733	4.39102e-21		Rab11fip5	0.9442	3.64802e-23		Ifi205	1.5095	5.36575e-35		Serinc2	0.9258	2.10483e-41		Lrrk1
					Ms4a6b	0.6332	3.6507e-83		B4galt6	0.4561	1.25392e-20		Cd38	0.8314	9.37928e-60						Ftl1	0.6256	4.72369e-28		mt-Atp6	0.7314	2.11102e-59		Etv3	1.835	6.45463e-123		C3	0.6859	4.47583e-21		Samd4	0.9451	7.45637e-23		Lgals9	1.3075	1.73217e-34		Sema7a	1.2785	7.56118e-41		Dctpp1
					Snx29	0.7943	4.14288e-83		Nr2c2	0.4207	1.58415e-20		Plekhg1	0.5726	3.74516e-59						Acot7	0.4786	9.64082e-28		Ehf	0.7643	3.22709e-59		Jak2	2.0093	3.73287e-121		Fgr	0.6909	4.66057e-21		St3gal5	0.392	7.82059e-23		Slfn3	0.3932	2.19417e-34		Myo6	0.886	1.05608e-40		Ramp3
					Rab11fip5	0.4863	1.29452e-82		Slc43a2	0.4531	2.13023e-20		Msr1	0.7264	8.01817e-59						Pmp22	0.9009	1.41022e-27		mt-Nd1	0.8302	5.31895e-59		Vgll4	1.3296	5.66091e-116		Rnh1	0.6062	4.6917e-21		Spire1	1.1871	8.14664e-23		Nlrc5	1.1734	6.2924e-34		Lzts1	0.7211	3.34929e-40		Arhgef10
					Arhgap18	0.7424	2.92479e-82		Gm19951	0.4461	3.64633e-20		Tnip1	0.7462	1.56969e-58						Sgms2	0.5892	2.34373e-27		Fbln2	1.1664	7.86221e-59		Arap2	2.1182	1.82067e-115		Emd	0.4303	7.66565e-21		Fer	0.612	8.38913e-23		Mthfr	0.9236	1.38243e-33		Rapgef5	0.7923	3.38889e-40		Prr5l
					Ehd4	0.7023	1.39611e-81		Fam169b	0.4305	4.6063e-20		Mitf	0.7625	2.29615e-58						Acod1	0.5889	4.00176e-27		Rpl13	0.7094	8.56721e-59		Lsp1	1.7139	2.9163e-115		Gm15283	0.4812	8.789e-21		Itm2b	1.0634	1.78321e-22		Nmi	0.6227	1.17981e-32		Myo10	2.111	1.09801e-39		Purg
					Cd83	0.7112	1.4354e-81		Ncoa1	0.3729	5.83754e-20		Igsf6	0.6457	3.08233e-58						Ampd3	0.6295	4.60287e-27		Jup	1.2048	1.39957e-58		C130026I21Rik	0.9514	4.45648e-115		Rpl18a	0.4569	9.31668e-21		Akr1b8	0.9545	1.89833e-22		Sp110	1.0236	2.0146e-32		Neo1	0.7005	1.11286e-38		Dapp1
					Camk1	0.4765	6.75912e-81		Cd93	0.3906	7.10563e-20		Cacna1d	0.8384	3.15196e-58						Lhfpl2	0.6235	2.69805e-26		Esrp1	0.8268	3.81315e-58		Alpk2	0.6077	6.83844e-115		Rps24	0.4304	1.02568e-20		Immp2l	1.1053	3.47292e-22		Samhd1	1.6445	2.28603e-32		Sec14l2	0.4096	2.33706e-38		Bco2
					Dtnbp1	0.7134	1.3476e-80		Cerk	0.3745	8.39668e-20		Tnfaip2	0.6812	5.07531e-58						Psmd1	0.5384	5.84413e-26		Rps4x	0.7795	6.346e-57		Tbc1d4	2.7009	1.15834e-114		Lyn	0.6547	1.06383e-20		Phyhd1	0.7026	4.01493e-22		Pde7b	2.1074	1.94339e-31		Arap2	1.9905	6.07938e-38		Gm20513
					Rnasel	0.6472	2.8985e-80		Soat1	0.4106	1.82996e-19		AA467197	0.6302	4.95993e-57						Taldo1	0.594	6.53317e-26		mt-Co3	0.7002	1.05465e-56		Pxdc1	0.9499	1.15146e-113		Hdac5	0.4964	1.09077e-20		Arsg	0.4735	4.17912e-22		Pml	0.7967	2.26416e-31		Il1r2	3.0798	5.46999e-37		Msrb3
					Cela1	0.3635	3.28977e-80		Sash1	0.3822	1.91624e-19		Airn	0.7783	5.22757e-57						Rgcc	0.7114	1.15251e-25		Col5a1	1.0457	1.31585e-56		Syngr2	1.4498	4.09396e-113		Rpl30	0.4406	1.70778e-20		Pltp	1.2464	7.29608e-22		Fgl2	1.6468	1.34717e-30		Kif1a	0.7891	8.64193e-36		Erlin1
					Impact	0.8003	9.58177e-80		Rnf150	0.4549	1.91763e-19		Mmp9	0.7842	1.22794e-56						Mmp14	0.541	2.23839e-25		Chl1	0.8858	4.67218e-56		Wnt11	0.5855	8.26822e-112		Ssr4	0.4731	1.80086e-20		Tmem267	0.8468	7.33052e-22		Adar	0.7958	2.33262e-30		Zeb1	3.2312	1.76819e-35		Tbc1d8
					Abl2	0.7183	1.82905e-79		Slc22a4	0.5165	2.15752e-19		Stac2	0.4575	2.5027e-56						Actb	0.508	2.78674e-25		Ube2e2	0.8306	1.07802e-55		Foxn3	2.0772	3.01017e-109		Rpl24	0.44	2.26806e-20		Lamp1	0.9099	7.62495e-22		1600014C10Rik	0.5692	7.28248e-30		Rnf24	2.3999	3.55045e-35		Lrrk2
					Ophn1	0.7224	4.12455e-79		Pf4	0.4134	2.15792e-19		Mtpn	0.6685	4.43464e-56						Ezr	0.7135	2.89006e-25		Rps16	0.7212	1.2947e-55		Tmem123	1.9997	1.23114e-108		Rpl36	0.4634	2.55802e-20		Stard8	0.9132	8.46338e-22		Setdb2	0.718	1.51203e-29		Nedd4	1.5858	1.01412e-34		Sema7a
					Gng2	0.9081	4.55838e-79		Katnbl1	0.4455	2.23248e-19		Pstpip2	0.7645	4.54804e-56						Spp1	1.5337	5.50564e-25		Stfa1	1.2693	1.73461e-55		Pkib	2.2506	3.19431e-108		Emilin2	0.5906	2.85478e-20		Akr1c13	0.4444	9.22776e-22		Lgals3bp	1.2599	1.2096e-28		Ncald	0.8101	1.83011e-34		Clec2i
					Wdfy3	0.6726	1.21153e-78		Plekhm3	0.3694	2.43825e-19		Zc3h12c	0.7721	1.33914e-55						Itgam	0.5175	8.31517e-25		Col17a1	1.1813	1.82471e-55		Mgl2	1.1414	3.76987e-107		Ptprc	0.5531	3.33567e-20		Ddx60	0.7362	9.9446e-22		Gm20559	1.1014	1.34717e-28		Socs1	0.5577	2.97016e-34		H2-Oa
					Cmip	0.6099	3.78237e-78		Tbl1xr1	0.3988	2.61451e-19		Sash1	0.6582	4.96712e-55						Slc6a8	0.4499	1.21758e-24		Rpl15	0.872	8.14638e-55		Rap2a	1.4091	5.32058e-107		Rpl17	0.438	3.38145e-20		Eps15	1.1084	1.06699e-21		Etnk1	1.0927	6.67024e-27		Itgax	0.931	5.00248e-34		St3gal3
					Nrros	0.6746	5.24312e-78		Gm15283	0.4213	2.66623e-19		Fth1	0.7166	5.20944e-55						Myof	0.5395	1.2374e-24		Rpl21	0.7896	8.17904e-55		Gpr132	1.4051	7.83522e-107		Antxr2	0.7393	6.47017e-20		Mctp2	0.5189	1.87783e-21		Ogfr	0.6694	7.16962e-27		Ctnnal1	0.5288	5.55277e-34		Cmtr1
					Smagp	0.3706	8.13071e-78		Hdac4	0.3539	5.23232e-19		Cd93	0.6842	4.04681e-54						Glipr2	0.4351	1.75503e-24		Hspb1	1.1779	8.51553e-55		Plcl1	1.7006	1.86637e-106		Ly6e	0.5225	7.30001e-20		Myo5a	1.2963	9.18506e-21		Ankle2	0.7522	1.10775e-26		Adgrg1	0.8296	9.13376e-34		Trim35
					Epsti1	0.5931	8.88527e-78		Man2a1	0.401	5.965e-19		Txn1	0.6886	2.00687e-53						Rapgef1	0.5037	1.77463e-24		Rpl5	0.8192	1.26857e-54		H2-DMa	1.2521	1.96856e-106		Rpl13	0.441	8.52947e-20		Creg1	1.2724	9.73373e-21		Axl	0.9215	1.64608e-26		Spint1	0.9017	1.40205e-33		Ric8b
					B4galt5	0.7141	9.81579e-78		Myom1	0.5434	1.5592e-18		Pilra	0.538	2.06602e-53						Agap1	0.4946	2.71761e-24		Rps15a	0.7851	1.31064e-53		Pmaip1	1.3592	2.99291e-106		Rpl15	0.4486	1.20188e-19		Lgmn	1.0558	1.02338e-20		Tor1aip1	1.1765	3.68972e-26		Mreg	1.4191	1.48047e-33		Pcyt2
					Rgl1	0.724	1.36516e-77		Tcf12	0.4384	2.38285e-18		AI504432	0.6041	1.6971e-52						Prkar2b	0.493	2.79829e-24		Trim29	1.085	9.83357e-53		Rnf157	1.7151	4.12953e-106		Lrrfip1	0.5931	1.83597e-19		Ust	0.7141	1.10285e-20		Mov10	0.352	5.0382e-26		Kdm2b	2.3663	1.70702e-33		Ccdc102a
					Plxnc1	0.5011	1.65857e-75		Lyst	0.5256	2.91653e-18		Esd	0.5838	3.36949e-52						Sod2	0.4653	3.23651e-24		Saa3	1.4569	1.85855e-52		Ptcd2	0.4692	2.18524e-105		Ubb	0.5133	3.19834e-19		Maf	1.1664	1.19221e-20		Pnp	1.3293	5.32913e-26		Wnk2	0.5286	2.36852e-33		Jag2
					Stard8	0.4864	1.54528e-74		Slc7a8	0.468	3.92337e-18		Glrx	0.7159	5.44222e-52						Ero1l	0.6298	4.35228e-24		Fxyd3	1.0425	2.99181e-51		Ptger4	1.0908	3.84079e-105		Cmip	0.5548	4.9729e-19		Tbc1d4	0.4004	3.84361e-20		Ms4a6b	1.2593	9.71614e-25		Bend6	0.6088	1.02627e-32		Sntb1
					Elmo1	0.6402	1.30986e-73		Mctp1	0.4662	4.1622e-18		Dusp16	0.7333	2.91143e-51						Tes	0.5044	4.44056e-24		Col6a1	0.8035	5.35759e-51		Rftn1	1.8951	6.35527e-105		Supt4a	0.4081	5.16819e-19		Zcchc24	0.6957	5.05169e-20		Bst2	1.2919	2.21932e-24		Nckap1	1.3411	1.07597e-32		Strip2
					Mertk	0.6513	2.01755e-73		Pla2g7	0.3611	5.4518e-18		Gm14636	0.9257	3.30671e-51						Plin2	0.4894	6.11596e-24		Rps3a1	0.6013	1.19806e-50		Ptpn3	0.8245	1.42477e-104		Pparg	0.8525	5.31083e-19		Gdf15	1.7519	5.27487e-20		Ly86	1.1759	3.10276e-24		Ank2	0.871	6.37394e-32		Plekha5
					Rap1a	0.7841	3.89403e-73		Sh3kbp1	0.3685	5.66144e-18		Slc25a37	0.5595	6.3085e-51						Psap	0.5347	8.65204e-24		Serpine1	1.3977	1.2055e-50		Dennd4a	2.031	7.03368e-104		F10	0.7975	5.41717e-19		Ccl7	1.698	1.05515e-19		Cd40	0.6558	4.69968e-24		Gpr141	2.0087	2.17257e-31		Ap1s3
					Tpd52	0.683	4.13937e-73		Fblim1	0.3478	5.75361e-18		Pld1	0.746	4.15264e-50						Nedd9	0.6575	3.03345e-23		Rps19	0.7061	3.6202e-50		Rras2	1.3266	1.94862e-103		Rps25	0.4428	6.71948e-19		Psap	1.034	2.91898e-19		Tmcc3	1.3603	5.31372e-24		Epb41l5	0.5015	3.6199e-31		Zeb1
					Ap1b1	0.484	8.2018e-73		Pkm	0.3222	7.65378e-18		Btg1	0.5463	8.62899e-50						Ccl9	0.65	3.05516e-23		Dennd2c	0.8439	5.33264e-50		Runx2	1.7267	4.98529e-101		Clec4e	0.6707	6.98954e-19		2210408I21Rik	0.5222	8.06218e-19		Parp10	0.6435	7.04805e-24		Pclaf	0.6825	9.95629e-31		Glcci1
					Zfp703	0.6645	1.29133e-72		Iqgap2	0.4676	8.20138e-18		Malt1	0.6976	2.59239e-49						Pf4	0.6363	3.44516e-23		Gata3	0.8449	7.12664e-50		Ikbkb	1.2444	1.06529e-100		Rpl35a	0.4096	7.10578e-19		Zbtb4	0.5954	1.16548e-18		Pnpt1	0.3817	9.94667e-24		Tbc1d4	3.3635	2.61775e-30		Traf4
					Npl	0.3673	1.31526e-71		Myo5a	0.3947	1.61124e-17		Ifi211	0.6291	4.53115e-49						Prdx5	0.4967	7.17062e-23		Rpl23	0.6359	8.23879e-50		Pak1	1.2903	1.19636e-100		Plcl1	0.6945	9.19644e-19		Scn1b	0.3962	1.45131e-18		Pttg1	0.694	2.40094e-23		Scimp	0.8567	3.23986e-30		Acsf2
					Atp6v1a	0.5384	2.99351e-71		Nus1	0.3455	1.66588e-17		Tlr2	0.6682	5.55935e-49						Psma7	0.5165	7.99024e-23		Casz1	0.8603	1.33982e-49		Socs2	1.4301	4.02334e-100		Lilrb4a	0.5525	1.27162e-18		Mt2	1.7327	2.19974e-18		Ifi207	1.3812	2.66123e-23		Grasp	1.7199	3.55409e-29		Rnf123
					Tanc2	0.6859	2.06909e-70		Hilpda	0.3972	2.13861e-17		Cd36	0.7223	3.00489e-48						Actn1	0.283	2.05654e-22		Rps5	0.723	1.95363e-49		Ptpn4	1.0489	1.3396e-99		Ms4a6b	0.4647	1.79769e-18		Bin1	0.8158	2.62581e-18		Dcp2	0.7696	1.45006e-22		Knl1	0.5097	3.61447e-29		Map4k1
					Sik3	0.6559	2.56673e-70		Spry2	0.2766	2.7213e-17		Maml3	0.9081	6.27096e-48						Pira2	0.4507	5.98498e-22		Lox	0.9427	2.28634e-49		Srgap3	1.0939	1.64725e-98		Gramd4	0.3521	1.81949e-18		Nfia	0.5714	3.28984e-18		Ms4a6c	1.2359	2.13598e-22		Gsdme	1.3755	4.48442e-29		Zbtb46
					Tbc1d22a	0.554	4.3161e-70		Pld1	0.3848	2.85463e-17		Carmil1	0.5961	4.14001e-47						Airn	0.4579	7.04096e-22		Postn	1.1597	2.51212e-49		Il21r	0.96	1.32353e-97		Nme2	0.5252	5.50592e-18		Slc9a9	1.1374	3.47952e-18		Trim12c	0.499	3.54485e-22		P2ry10	1.3111	8.54627e-29		Mppe1
					Grn	0.4971	1.1755e-69		Map4k3	0.4063	3.52643e-17		Morrbid	0.6824	5.29412e-46						Kmt5a	0.4756	7.55718e-22		Apbb2	0.9275	3.31192e-49		Malt1	1.8342	2.15422e-94		Ncf2	0.5338	6.02883e-18		Arhgef12	0.7009	3.97114e-18		Fcgr4	1.1979	4.05678e-22		Cdc20	0.2579	9.35843e-29		P3h2
					Rab7b	0.6057	2.79103e-69		Dleu2	0.4229	4.81962e-17		Lrrk2	0.7762	8.73905e-46						Gsap	0.4939	1.04742e-21		Rpl10a	0.8251	5.27578e-49		4833407H14Rik	0.3108	2.8434e-93		Uba52	0.4282	6.89298e-18		Epb41l1	0.6228	3.98647e-18		Uba7	0.507	4.36424e-22		Slc30a4	0.8149	1.6897e-28		H2-DMb1
					Ubl3	0.6621	6.52368e-69		Rnf149	0.4431	5.24042e-17		Zeb2	0.5104	1.78232e-45						S100a4	0.5794	2.46782e-21		Ablim1	0.8616	2.60258e-48		Map3k1	1.3659	8.45095e-92		Ern1	0.5973	7.8676e-18		Serinc3	1.123	5.61579e-18		Ccl12	2.3439	4.53413e-22		Pak1	2.4662	1.83891e-28		Kif21b
					Hexa	0.5837	1.86331e-68		Sgms2	0.3458	8.65713e-17		Bcl2a1b	0.6179	2.61999e-45						Ralgapa2	0.5923	3.0707e-21		mt-Nd4	0.7061	3.4717e-48		Pmvk	0.866	1.14253e-91		Lst1	0.4985	1.10738e-17		Rnasel	1.132	5.90348e-18		Tent5a	0.9249	8.51783e-22		Spc24	0.4049	6.3408e-28		Gatm
					Lncpint	0.6394	1.89329e-68		Apoc2	0.4031	1.26058e-16		Nt5e	0.5797	6.18812e-45						Ndst1	0.3515	3.14366e-21		Rps15	0.7305	5.10881e-47		Thada	1.6208	1.39464e-91		Specc1l	0.5359	1.20648e-17		Mt1	1.3327	6.95383e-18		Ccl5	1.9243	1.65566e-21		Afdn	2.121	6.73168e-28		Rnase6
					Phyhd1	0.3497	3.40741e-68		Fam20c	0.3669	1.27485e-16		Pkm	0.4768	8.61525e-45						Eif4g2	0.4936	5.39516e-21		mt-Nd2	0.7292	6.58013e-47		Selplg	1.5563	8.82597e-91		Sec61b	0.4195	1.29927e-17		Tmem140	0.7843	8.28276e-18		2005-03-01	0.8646	2.03175e-21		Birc5	0.5611	1.41209e-27		H2-Eb1
					Atp13a2	0.4495	8.69965e-68		Chd7	0.3426	1.92653e-16		Snx10	0.6048	1.26594e-44						Pld1	0.4438	7.44556e-21		S100a11	0.8056	1.53421e-46		Fnbp1l	1.3843	2.74989e-89		Alas1	0.5299	1.41471e-17		Ctsa	0.9556	1.15169e-17		Apobec3	0.8301	2.21971e-21		Plekha5	1.2924	1.42743e-27		Psmb9
					Slc8a1	0.9373	1.43296e-67		Emilin2	0.3516	2.28507e-16		Ptger2	0.3513	3.66024e-44						Cd274	0.3389	8.70868e-21		Fabp4	1.6401	5.2639e-46		Vdr	0.7957	1.17113e-87		Mapkapk3	0.509	1.41596e-17		Idh1	0.7255	1.79983e-17		Cfb	1.0121	3.02117e-21		Tspan2	0.2953	2.78186e-27		Hint3
					Tbc1d15	0.5978	1.62832e-67		Ecm1	0.3616	2.45819e-16		Fam102b	0.8944	3.76679e-44						Tmsb10	0.52	1.22947e-20		Rps10	0.6484	8.70759e-46		Gcnt2	1.5753	2.36999e-87		Ncf4	0.3989	1.49635e-17		Akr1b3	0.8778	2.00797e-17		H2-T22	0.6484	4.82269e-21		Diaph3	0.675	2.80836e-27		Rubcnl
					Lyn	0.7376	3.85684e-67		Crybg3	0.4069	3.12071e-16		Gapdh	0.6345	4.69892e-44						Ugp2	0.5627	1.32116e-20		Nedd4	0.8932	1.03167e-45		Tmem176a	1.091	6.31789e-87		Ifitm2	0.6545	1.69515e-17		Hist1h1c	0.9053	2.10495e-17		Psmb8	0.9089	1.14748e-20		Zfp867	0.3327	4.76456e-27		Tspan13
					Lcorl	0.84	8.27899e-67		Fem1c	0.3537	5.20435e-16		Ehd1	0.5431	8.53012e-44						Glrx	0.5677	1.36259e-20		Rpl26	0.7181	3.30869e-45		Fam49a	1.1652	2.16804e-86		Cenpa	0.5255	1.85676e-17		Adamtsl5	0.5342	2.9314e-17		AW011738	0.7842	8.04662e-20		Cdh1	2.0716	5.27585e-27		Polr1a
					Lst1	0.69	1.85349e-66		Btg1	0.3043	5.95973e-16		Pon3	0.5994	1.08094e-43						Rhoc	0.5066	1.40022e-20		Rpl18a	0.6914	6.00596e-45		Birc2	1.1292	1.11025e-85		Ikbkb	0.3902	1.86075e-17		Jund	1.0703	3.285e-17		Rnf34	0.5257	4.52388e-19		Firre	0.5262	5.40985e-27		Prkar2a
					Rgs10	0.5654	2.46013e-66		Gm13986	0.4365	7.78624e-16		2510009E07Rik	0.538	4.43719e-42						Eno1	0.5181	2.27793e-20		Rpl17	0.6442	6.14583e-45		Sh3bp4	0.7638	7.84564e-85		Ccr1	0.629	2.24225e-17		Siglec1	0.448	3.6246e-17		Psmb9	0.6717	5.20005e-19		Fndc4	0.4106	7.87395e-27		Osbpl3
					Ly6e	0.845	3.28236e-66		Tnrc6a	0.3661	1.19603e-15		Orai2	0.5072	5.90442e-42						Iqsec1	0.43	2.37134e-20		Col6a3	0.9497	6.83112e-45		Tmem131	1.745	2.6487e-84		Aif1	0.5891	2.34504e-17		Hpse	0.8707	4.85888e-17		Itpr1	0.944	8.28828e-19		Prc1	0.5517	1.37387e-26		Ccr9
					Ap2a2	0.5651	1.77847e-65		Adssl1	0.3513	1.36574e-15		Cxcl5	2.3975	8.93812e-42						Tbxas1	0.6007	3.53909e-20		Eef1b2	0.7973	1.85213e-44		Polb	1.2441	9.8213e-81		Rps11	0.4392	3.29992e-17		Ccl2	1.7436	8.17039e-17		Ly6e	1.252	1.03786e-18		Fnbp1l	2.6214	1.74733e-26		Gcnt2
					Jmy	0.594	8.93346e-65		Fbxl5	0.4662	1.76648e-15		Rbpms	0.5438	1.60655e-41						2510009E07Rik	0.4877	4.27619e-20		Lypd3	1.0691	1.96216e-44		Mrps6	0.75	1.03212e-80		Gpr132	0.4145	3.98801e-17		Pepd	0.8287	1.00119e-16		Sp140	1.0356	1.88008e-18		Lockd	0.3472	2.23583e-26		Tmtc2
					Sdcbp	0.4688	1.08367e-64		Gpi1	0.3898	1.8406e-15		Dram1	0.5871	6.33393e-41						Mdm2	0.5812	5.76628e-20		Tmem45a	0.8663	2.20442e-43		Lactb	1.0157	1.25765e-79		Mcemp1	0.5165	4.474e-17		Hpgds	0.8998	1.59121e-16		Tdrd7	0.6716	2.81621e-18		Zdhhc2	0.6539	2.01606e-25		Gfod1
					Ctsc	0.622	1.48343e-64		App	0.3315	1.85533e-15		Slc16a10	0.6841	6.69721e-41						Rhoa	0.4329	6.68435e-20		Ssbp2	1.1001	2.98504e-43		Zfp809	0.7955	1.40392e-79		Gm34084	0.5562	5.39092e-17		Arhgap19	0.4679	2.7083e-16		Sgcb	0.3283	1.52849e-17		Plpp5	0.4179	5.13223e-25		Eif2ak3
					Dnmt3a	0.5384	9.56745e-64		Atp2b1	0.314	2.79351e-15		Fam20a	0.5192	7.45293e-41						Slc22a4	0.4511	8.477e-20		Apoc1	0.9703	5.90986e-43		Ifi30	1.2966	2.77124e-79		Cyp4f18	0.4158	7.78254e-17		Mir99ahg	0.8557	2.95029e-16		G530011O06Rik	0.9716	2.93705e-17		Ptgs1	2.2045	5.52342e-25		Map3k14
					Tmem65	0.6633	1.28342e-63		Mcl1	0.2516	2.97014e-15		Junos	0.5479	1.0631e-40						Msn	0.4097	1.17298e-19		Rpl29	0.8062	1.08934e-41		1700025G04Rik	1.0209	3.60084e-79		D8Ertd738e	0.504	7.93944e-17		Prkcb	0.9381	5.52263e-16		Spon1	0.7639	3.13974e-17		Myo1d	1.0779	8.93849e-25		Gm17089
					Fgd2	0.3499	1.56164e-63		Tcf7l2	0.4595	3.07886e-15		Gm12840	0.849	1.33413e-40						Anxa1	0.5618	2.86513e-19		Prdx5	0.8668	1.52174e-41		Irf4	0.4898	2.57521e-78		Slc38a1	0.5716	9.94624e-17		C1qb	1.0367	8.34026e-16		Ascc3	1.1695	1.51937e-16		Hvcn1	1.3905	1.34137e-24		Gm35853
					Foxp1	0.5705	1.99934e-63		Mtss1	0.4281	4.0762e-15		Slc15a3	0.5379	1.44874e-40						Nme1	0.5019	2.95035e-19		Rps7	0.6852	2.73934e-41		Avpi1	0.8831	4.58609e-78		Hspa5	0.7315	1.32236e-16		Sdc3	1.0167	1.48437e-15		Ifitm3	1.2433	1.54917e-16		Pcdh7	2.0865	3.33899e-24		Cbfa2t3
					Cipc	0.4394	7.77895e-63		Mdfic	0.3405	4.84612e-15		Trim13	0.3149	1.5646e-40						Pid1	0.5028	3.53356e-19		Aqp3	0.9933	1.25839e-40		Bhlhe40	1.3647	8.2756e-78		Btbd9	0.6301	1.37857e-16		Ehd4	0.996	2.13589e-15		Frmd4a	0.797	1.7493e-16		Ltc4s	1.7377	4.29057e-24		Arl3
					Atp8a1	0.5554	1.08014e-62		Arhgap22	0.4528	5.0554e-15		Nfkb1	0.5153	2.17164e-40						Gbe1	0.6176	3.91902e-19		Rpsa	0.5744	2.38047e-40		Mrps27	0.4558	1.98704e-77		Rps2	0.4273	2.01596e-16		Iqgap2	0.8821	2.30958e-15		Ifi27l2a	1.6307	1.96509e-16		Ttc39c	1.5104	2.96393e-23		H2-Ab1
					Specc1l	0.7415	1.83287e-62		Stag1	0.3197	5.8287e-15		Gsap	0.5535	2.62264e-40						Naip2	0.4758	6.14762e-19		Ccl3	1.0144	2.4491e-40		Serinc5	0.9957	4.86964e-77		Rps9	0.3759	2.68684e-16		Hist1h2bc	0.7188	3.6482e-15		Slamf7	1.195	2.50716e-16		Rras2	1.0688	3.27632e-23		Ppat
					Csf1r	0.5334	1.83336e-62		Tmem189	0.3422	6.33834e-15		Mmp8	0.9368	3.6241e-40						Mif	0.4541	7.68098e-19		Pof1b	0.7857	4.30335e-40		St8sia4	1.8176	3.12113e-76		H2afz	0.4184	2.81864e-16		Rab3il1	0.5518	3.85308e-15		H3f3b	1.0939	3.0064e-16		Tnfaip8l1	0.2948	4.9934e-23		Meis1
					Lrp6	0.5439	2.2703e-62		Arrdc4	0.347	9.44219e-15		Arhgap31	0.7981	3.92777e-40						Tppp3	1.0164	3.19419e-18		Flnb	0.9524	4.45648e-40		Grb2	1.024	9.73339e-76		Fth1	0.4675	3.75706e-16		Fam219a	1.1126	4.86438e-15		Sdc3	0.9432	8.03262e-16		Hist1h2ae	0.7137	5.07063e-23		H2-DMa
					Sgpl1	0.5238	3.32592e-62		Lonrf3	0.3861	1.21796e-14		Msantd3	0.3173	4.35137e-40						Ckap4	0.3992	3.29426e-18		Krt6b	1.1044	4.91901e-40		E330009J07Rik	0.9648	1.08109e-75		F5	0.5666	4.27774e-16		Selenbp1	0.4483	6.02263e-15		Tmem140	0.7226	8.59772e-16		Med12l	0.4215	6.47394e-23		H2-Aa
					Slc25a28	0.5356	3.4392e-62		Crebrf	0.3961	1.71335e-14		Mafg	0.5082	5.95853e-40						Cnih1	0.4616	3.98051e-18		Tacstd2	1.0673	1.77102e-39		Il7r	1.7232	1.5172e-75		Rpl21	0.4219	5.46434e-16		Fkbp9	0.2596	6.66111e-15		4930599N23Rik	0.4373	1.38018e-14		Gna15	0.4335	6.8721e-23		Ifitm1
					Fcer1g	0.5431	8.50027e-62		Sel1l3	0.421	1.79365e-14		Emb	0.5633	1.15321e-39						S100a11	0.366	4.99546e-18		Emp2	0.8142	3.86926e-39		Stat5b	1.2644	2.3144e-75		Sestd1	0.4454	5.89318e-16		P2ry12	0.3575	2.54118e-14		Stard3	0.474	1.88304e-14		Rgs2	2.756	7.98549e-23		Zfp710
					Por	0.5914	1.55976e-61		Gas2l3	0.3475	2.20545e-14		Nfkbia	0.4799	2.39016e-39						Tspo	0.4406	5.12481e-18		Rps13	0.6585	1.09045e-38		Abcc4	1.3189	2.56726e-75		Gpr183	0.2508	6.07331e-16		Itsn1	0.9869	2.76937e-14		Sap30	0.4642	2.09183e-14		Ptk7	0.3015	1.13602e-22		Bloc1s2
					Ms4a6c	0.5291	1.63336e-60		Ophn1	0.3397	2.22393e-14		Cd24a	0.6615	1.24599e-38						Ostf1	0.4183	5.97141e-18		Rpl8	0.5985	8.96965e-38		Pip4k2a	1.521	1.37951e-74		Psme1	0.4042	6.14826e-16		Adgrg1	0.4664	3.31388e-14		Slc30a1	0.6004	2.20854e-14		Kif15	0.3743	1.56902e-22		Ccnd1
					Ms4a14	0.3471	2.81899e-60		Fndc3b	0.3069	2.46899e-14		Maff	0.473	1.27387e-38						Arpc5	0.4515	6.94121e-18		Mt1	0.7792	1.81616e-37		H2-Q6	0.8551	6.59077e-74		Siva1	0.3079	6.15158e-16		Ctsl	0.9406	4.28602e-14		Dennd1b	0.9445	2.36945e-14		Racgap1	0.4154	1.67798e-22		Plbd1
					Celf2	0.6014	3.84397e-60		Fgd6	0.3087	2.92125e-14		Egr2	0.5219	4.47299e-38						Fmnl2	0.4083	7.30002e-18		Fam25c	1.1044	1.84743e-37		Slc25a20	0.7499	1.1102e-73		Chd7	0.534	7.38364e-16		Lima1	0.6365	4.29127e-14		Tor1aip2	0.802	4.81901e-14		Ccnd1	0.8736	7.02362e-22		Ncoa7
					Sik1	0.4999	6.60191e-60		Mef2d	0.2919	3.41796e-14		Tes	0.5647	1.84816e-37						Pqlc3	0.4324	1.01399e-17		Rps3	0.6839	2.39469e-37		Madd	0.7116	1.3899e-73		Uck2	0.4257	7.61101e-16		Mgst1	0.7805	4.64835e-14		Tapbp	0.7839	5.16578e-14		Plekhg5	0.4897	1.15833e-21		Stard10
					Prune2	0.3264	7.88894e-60		B4galt1	0.3496	4.24605e-14		Thbd	0.6485	1.87186e-37						Slc23a2	0.5519	1.03144e-17		Egr1	0.8058	4.33052e-37		Bri3bp	0.476	1.41303e-73		Rnf149	0.4734	7.9286e-16		Rcn3	0.5164	4.99677e-14		Fcer1g	0.7957	5.23032e-14		Fap	0.4704	1.55079e-21		Pnpo
					Gm13391	0.3846	8.22001e-60		Bcl6	0.3259	4.93534e-14		Kmt5a	0.5098	2.33218e-37						Psmb5	0.4625	1.21353e-17		Rpl36a	0.7203	5.42375e-37		Lrrc4	0.6158	7.4761e-73		Tcp11l2	0.5518	8.55745e-16		Optn	0.6579	6.64386e-14		Nsd3	1.0483	9.60753e-14		Pkib	2.0107	1.86119e-21		Ust
					Laptm5	0.4231	2.13286e-59		Gpalpp1	0.4013	5.74751e-14		Rhou	0.4556	3.33518e-37						Chchd2	0.4151	1.3606e-17		Rps6	0.7251	8.61977e-37		Nuak2	0.8211	1.46964e-72		Ptafr	0.4695	8.70861e-16		Camk1	0.8648	8.45247e-14		Milr1	0.5997	1.19439e-13		Plpp1	0.6012	3.50247e-21		Psmb8
					Fchsd2	0.7734	3.45079e-59		Bach2	0.3166	6.03958e-14		Pbx1	1.0906	5.17195e-37						Fry	0.4393	1.36118e-17		Pkp1	0.918	1.73627e-36		Sipa1l3	0.9133	2.53617e-72		Cd300c2	0.499	9.32654e-16		Fchsd2	0.8555	9.05112e-14		B2m	0.7121	1.38384e-13		Dapp1	2.2105	4.07925e-21		Wdfy4
					Gna12	0.4682	4.05463e-59		Ttc39b	0.3357	6.06628e-14		Mcemp1	0.3691	6.75746e-37						Eif4ebp1	0.3739	1.5598e-17		Rpl32	0.6135	3.2595e-36		Hivep1	1.1839	4.14163e-72		Got1	0.5446	1.18753e-15		Prps2	0.336	9.06021e-14		Psmb10	0.6393	3.25837e-13		Cenpf	0.6713	4.32323e-21		Map4k5
					Snx8	0.5881	7.02232e-59		Trf	0.5854	7.94261e-14		Ciapin1	0.429	8.12706e-37						Fmn1	0.4504	2.66966e-17		Rpl11	0.6681	7.5702e-36		Cd83	1.6175	8.94292e-72		Ass1	0.3629	1.70738e-15		Agpat3	0.4265	1.00218e-13		Ikzf1	0.8517	4.21168e-13		Mical2	0.6914	4.47272e-21		Tssc4
					Snx2	0.6259	2.65283e-58		Snx30	0.3853	8.2277e-14		Cd274	0.4356	1.10613e-36						Xpo1	0.406	3.02134e-17		S100a14	0.9317	8.86577e-36		Osgin2	0.7315	2.15443e-71		Rpl39	0.4188	1.85226e-15		Ptk2	0.5895	1.02838e-13		Lst1	0.9229	5.85483e-13		S1pr3	0.401	8.62188e-21		Havcr2
					Lpin2	0.614	2.74447e-58		Bnip3	0.3078	8.51906e-14		Jarid2	0.6612	4.04742e-36						Gde1	0.4077	3.68248e-17		Rpl30	0.601	1.69232e-35		Ccnd2	0.5269	5.07719e-70		Mefv	0.5389	1.92739e-15		Aldh2	0.9639	1.12629e-13		Tent4a	0.3707	6.31633e-13		Snx11	0.7325	1.41646e-20		Cd74
					Cd163	0.7017	2.99005e-58		Map4k4	0.3217	8.6579e-14		Nus1	0.4958	1.05791e-35						S1pr2	0.3629	3.8174e-17		Rpl27a	0.5564	2.94702e-35		Gramd4	0.6819	8.57472e-70		Gm16599	0.4071	1.96241e-15		Nxpe5	0.7526	1.13269e-13		Fndc3a	0.9191	7.12014e-13		Elmsan1	1.4996	2.18006e-20		Raet1e
					Otulinl	0.5501	9.13402e-58		Rusc2	0.3704	1.05112e-13		Mctp1	0.6749	3.34217e-35						Il1a	0.3689	4.43194e-17		Fam162a	1.0282	3.47705e-35		Runx3	0.91	1.12852e-69		Rps23	0.3912	2.36199e-15		Palld	0.5995	1.42771e-13		Arid5a	0.5044	7.18273e-13		Sh3rf1	1.4064	4.42326e-20		Cadm1
					Abhd12	0.5033	1.21374e-57		Lpxn	0.3409	1.68161e-13		Sdc4	0.5164	5.07919e-35						Atp6v0e	0.3739	8.77613e-17		Dsg1a	0.9798	7.34803e-35		Csf2rb	1.3585	2.19253e-69		Lsm12	0.3779	3.14133e-15		Sptbn1	0.7008	1.43896e-13		Fbxw17	0.2843	9.06473e-13		Hpgds	2.0672	7.12427e-20		Sfxn2
					Rnf150	0.63	1.3349e-57		Vamp4	0.3426	1.95328e-13		Gclm	0.5869	5.50604e-34						Mcub	0.417	9.68416e-17		Rps25	0.6589	3.5167e-34		Etv6	1.2685	8.92091e-69		Rpl8	0.375	5.54944e-15		Tfrc	0.7224	2.21996e-13		Rnf114	0.6913	2.62819e-12		Pkp4	1.6697	8.6815e-20		Kdm4a
					Nrg1	1.2987	1.6464e-57		Itpkb	0.3674	2.1361e-13		Lyz2	0.5701	6.49915e-34						Plp2	0.401	9.7841e-17		mt-Co2	0.5039	9.02395e-34		Cnn2	0.8144	1.3539e-68		Ucp2	0.5159	5.65803e-15		Mesd	0.3432	3.09417e-13		Il21r	0.3938	2.92343e-12		Ccnb2	0.5173	8.96574e-20		4833407H14Rik
					P2ry6	0.3897	2.50716e-57		Luc7l2	0.2961	2.41177e-13		Ccl24	0.9777	7.39409e-34						Slc2a1	0.5235	1.04485e-16		Slco3a1	0.9326	1.63604e-33		Dgat1	1.1521	6.2006e-68		Auh	0.4165	5.79652e-15		Bnip3	0.9802	3.31945e-13		Ccr5	1.1288	3.11887e-12		H2-DMa	2.3123	9.76208e-20		Ccdc134
					Cd300a	0.5906	4.56042e-57		Arid5b	0.3602	2.80423e-13		Znrf1	0.5102	1.38783e-33						Ftl1-ps1	0.5242	1.08526e-16		Inhba	0.6573	1.90599e-33		Sipa1l1	1.6042	3.94998e-67		Ndufa13	0.3756	6.83623e-15		Wdr91	0.6256	3.65574e-13		Vcpip1	0.7506	3.55265e-12		Prex2	0.5436	1.02698e-19		Naaa
					Litaf	0.4939	8.26597e-57		Elk3	0.3547	3.36202e-13		Cdc42ep2	0.3458	1.51439e-33						Atf1	0.4586	1.12682e-16		Il33	0.8842	1.98668e-33		Cd72	0.6265	5.43578e-67		Tarm1	0.3416	9.4389e-15		Itm2c	0.9253	4.72674e-13		Il15ra	0.3523	4.92314e-12		Sqle	0.5915	1.53932e-19		Strada
					Trerf1	0.6028	1.3478e-56		Iqsec1	0.3464	3.81549e-13		Lpar1	0.564	8.27979e-33						Clec4d	0.3991	1.25088e-16		Crim1	0.742	2.06682e-33		Srgap1	1.0969	6.30278e-67		Cux1	0.5136	9.441e-15		Tpp1	0.7645	7.20071e-13		Morc3	0.7571	4.92428e-12		Dcstamp	0.8356	2.83021e-19		Sp140
					Aldh2	0.4862	1.412e-56		Elf2	0.3998	3.93864e-13		Tmcc1	0.7511	9.00273e-33						Capza2	0.3628	1.52604e-16		Rpl14	0.7354	4.01054e-33		Slc5a3	0.5586	1.90785e-66		Fam49a	0.4185	1.01483e-14		Gnpda1	0.6249	9.58943e-13		Aida	0.5049	5.73228e-12		F11r	1.2252	3.39617e-19		Elac2
					Pou2f2	0.447	1.78705e-56		Zmynd8	0.3321	3.98468e-13		Chst11	0.6456	1.78502e-32						Slc48a1	0.5587	1.6891e-16		Urah	0.8031	5.02011e-32		Swap70	1.4319	3.16829e-66		Psmb8	0.3121	1.17439e-14		Hmox1	1.0733	1.08481e-12		Usp25	0.7773	6.91657e-12		Ckap2l	0.4684	3.44981e-19		Itpr1
					Ahcyl2	0.754	3.72506e-56		Rufy3	0.37	4.07999e-13		Gpi1	0.4415	3.87225e-32						Tnfrsf23	0.3595	2.0432e-16		Rpl18	0.5856	6.04659e-32		Lmnb1	1.1637	6.46489e-66		Rpl10a	0.3913	1.23961e-14		Dennd2a	0.6845	1.08722e-12		Ccdc25	0.4269	7.76438e-12		Tuba1a	1.379	1.16184e-18		Fnbp1
					Picalm	0.5209	5.71498e-56		B3gnt5	0.3258	4.63018e-13		Spata13	0.3303	4.16645e-32						Hsp90ab1	0.3907	2.06292e-16		Cxcl3	0.5257	7.19231e-32		Gfpt1	1.505	1.60568e-65		Maml3	0.4282	1.30821e-14		Kif3a	0.6263	1.27265e-12		Tlr8	0.3432	9.2402e-12		Rgs18	0.5215	2.27322e-18		Evi2
					Lamp1	0.4565	7.12367e-56		Ypel2	0.2838	4.92566e-13		Srgn	0.45	4.94944e-32						F10	0.3883	2.10436e-16		Cst6	1.6649	9.79765e-32		Cenpa	1.1508	2.02294e-65		Zmiz1	0.4398	1.50097e-14		Fads1	0.3418	1.94561e-12		Trim26	0.3836	1.17132e-11		H2-Eb1	2.3109	2.76466e-18		Stn1
					G530011O06Rik	0.3725	1.43485e-55		Diaph1	0.3073	5.94694e-13		Elk3	0.5306	5.37201e-32						Clec4n	0.7896	2.21047e-16		Rack1	0.6136	1.88135e-31		Tmsb4x	1.2635	5.07565e-65		Adssl1	0.3781	1.52425e-14		Gpr146	0.4885	2.10525e-12		Smchd1	1.0575	5.37641e-11		Rad54l2	0.88	4.61821e-18		Uxs1
					Ccr2	0.7234	1.78118e-55		Arg2	0.3115	6.89846e-13		Nfkbiz	0.5595	7.53312e-32						Hspa1b	1.1866	2.3148e-16		Mmp2	0.7029	2.13293e-31		Tbc1d8	1.8484	1.39225e-64		Sec61g	0.4852	1.75609e-14		Fosb	0.7334	2.5523e-12		Evi2a	0.6543	6.73033e-11		Dip2c	1.4322	7.17739e-18		Trim11
					Rilpl2	0.5885	1.7984e-55		Fbxo42	0.3718	1.07124e-12		Hmox1	0.7361	1.00781e-31						Ecm1	0.5096	3.30003e-16		Rps23	0.5223	9.76527e-31		Akt3	1.2495	3.62052e-64		Rpl27a	0.3682	1.81894e-14		Mtss1	0.9579	3.55541e-12		Il18	0.6208	7.11098e-11		Kynu	0.4683	8.28288e-18		Cst3
					Hfe	0.3186	2.01205e-55		Ctps2	0.3584	1.3749e-12		Gm13986	0.5808	2.1043e-31						Inhba	0.6861	4.99634e-16		Myo10	0.6999	2.50938e-30		Nhlrc2	1.0982	1.06018e-63		Syngr2	0.4112	1.86361e-14		Prune2	0.5015	4.10984e-12		Dennd1a	0.8451	7.49635e-11		Sema5a	1.2686	9.0961e-18		Gprc5a
					Cltc	0.5003	2.43297e-55		Kansl1	0.3445	1.4532e-12		Hipk1	0.5172	2.38699e-31						Plekhm3	0.3874	5.10957e-16		Rps27a	0.5125	6.52011e-30		Ktn1	1.8895	1.55073e-63		Rps27	0.4001	3.2281e-14		Ctla2a	0.4117	5.10939e-12		Tcof1	0.3652	7.99126e-11		Gfod1	1.5333	1.0767e-17		Qtrt2
					Tpcn1	0.3318	4.6155e-55		Cd300lb	0.3383	1.6651e-12		Flrt2	0.4794	5.61491e-31						Hopx	0.4122	5.55362e-16		Mt2	1.0097	7.94884e-30		Rnf180	1.5033	1.13545e-62		Irak2	0.4259	3.42151e-14		Plekhb2	0.699	8.29687e-12		Aff1	1.0697	9.82132e-11		H2-Ab1	2.6726	1.3391e-17		1700025G04Rik
					Evi2a	0.3982	9.21493e-55		Sbf2	0.3433	1.74819e-12		Cdyl2	0.407	9.67908e-31						Ptpre	0.3995	1.01564e-15		S100a16	0.8488	8.3616e-30		Gm15987	1.2403	1.2697e-62		Rpl6	0.3681	3.51371e-14		Pcmtd1	0.7735	8.59413e-12		Taok3	0.8224	1.0168e-10		Wwtr1	1.191	1.61159e-17		Cytip
					Cd63	0.5811	1.07872e-54		AC149090.1	0.435	2.38055e-12		Slc44a1	0.5185	1.15649e-30						Cdk14	0.511	1.17087e-15		Rpl22	0.6443	1.33603e-29		Rrad	0.4802	4.43286e-62		Mir22hg	0.3823	4.87032e-14		Gm10134	0.3907	8.68114e-12		Siglec1	0.3757	1.11444e-10		Ube2c	1.0098	1.7813e-17		Gng10
					Tns3	0.5921	1.37921e-54		Mtus1	0.332	2.43756e-12		Sh3bp5	0.4365	1.31872e-30						Ikbkg	0.3165	1.33982e-15		Ndufa4l2	0.793	2.99881e-29		Tmem176b	0.8239	7.52804e-62		Ralgps1	0.4636	4.90026e-14		Dpp7	0.3439	8.8173e-12		Coro2a	0.6458	1.6005e-10		Erc1	1.1242	1.90452e-17		Tuba1a
					Oxct1	0.5491	1.90614e-54		Glis3	0.3116	2.88443e-12		Rab32	0.4305	4.49108e-30						Rassf8	0.4192	1.40976e-15		Tmsb10	0.7071	4.68301e-29		Ubac2	0.8093	9.12377e-62		Slc16a3	0.546	7.24117e-14		Trf	1.1496	9.3874e-12		Tmem184b	0.6901	1.62446e-10		Cd74	2.8141	1.91373e-17		Zfp366
					Grb2	0.4938	2.18079e-54		Dpep2	0.371	2.89048e-12		Fosl1	0.2963	5.15843e-30						Ugdh	0.4054	1.42387e-15		S100a6	0.5219	6.54843e-29		Eipr1	0.5985	1.49971e-61		Rbm3	0.4079	7.39491e-14		Atp6v0a1	0.6411	9.80923e-12		Rin2	0.624	1.9425e-10		C77080	0.3305	2.95482e-17		Lrba
					Max	0.4133	1.01917e-53		Mospd2	0.3237	4.43613e-12		Tgm2	0.4412	8.75898e-30						2008-09-01	0.4009	1.48263e-15		Rps17	0.6491	7.08547e-29		Pde4b	1.0562	2.11162e-61		Aph1c	0.4146	8.47496e-14		Rsad2	1.0486	1.06493e-11		AW112010	1.0175	2.41318e-10		Ube2e2	1.0839	6.68533e-17		Rab43
					Myo5a	0.559	1.20495e-53		Uhrf1bp1l	0.3353	5.65407e-12		Trem1	0.3422	1.46486e-29						Bnip3	0.4302	1.62516e-15		Acod1	0.7867	7.71328e-29		Ubxn2a	0.633	3.00908e-61		Atp2b4	0.5575	8.66007e-14		Kif1b	0.8186	1.15588e-11		Capza2	0.6516	2.95694e-10		Apbb2	1.2692	7.53989e-17		Fyn
					Foxn3	0.3828	2.57672e-53		Jmjd1c	0.301	6.62481e-12		C3	0.3884	2.32562e-29						Mob3b	0.4244	1.9049e-15		Defb6	1.0453	1.69924e-28		H2afz	1.6471	6.73442e-61		Slc7a11	0.5886	1.22095e-13		Pde7b	1.3334	2.13852e-11		Tmem171	0.3958	4.30245e-10		Mb21d2	0.3993	9.53898e-17		Ctnnd2
					Pitpnc1	0.6832	5.52175e-53		Phf21a	0.3979	6.76253e-12		Fmnl2	0.5025	2.7056e-29						Dubr	0.3	2.94909e-15		Gm15987	0.7424	1.81956e-28		Akap13	1.0739	1.34235e-60		Ifnar1	0.4408	1.57764e-13		Slc12a7	0.3646	4.6745e-11		Aif1	0.9135	4.33494e-10		Zfp266	0.5889	2.35329e-16		5730522E02Rik
					Hivep2	0.6531	6.51664e-53		Tnrc6b	0.4302	7.01271e-12		Lrrc8d	0.5412	2.75633e-29						Stac2	0.31	3.33264e-15		Rpl39	0.5281	1.95773e-28		Ap1s3	0.5507	1.72379e-60		Tax1bp1	0.4416	1.70128e-13		Sord	0.4722	5.18405e-11		Slc8a1	0.9501	5.02569e-10		Tspan9	0.4918	3.02848e-16		Scd1
					Vsir	0.4773	6.8438e-53		Fcho2	0.3021	7.92035e-12		Igf2r	0.3832	2.93761e-29						Ptprs	0.5034	3.35953e-15		Rps24	0.4592	2.0527e-28		Ece1	0.8413	3.02434e-60		Cox8a	0.3978	1.84261e-13		Mertk	0.8213	5.21603e-11		D1Ertd622e	0.5657	6.89542e-10		Nectin1	1.3157	3.55235e-16		Nsmaf
					Btaf1	0.6605	2.73896e-52		Irak2	0.2889	1.27716e-11		Slfn2	0.4423	3.44805e-29						Cd44	0.3351	3.86422e-15		Rpl7	0.5278	2.27441e-28		Zmiz2	0.7051	3.12137e-60		Pla2g7	0.5124	1.954e-13		Snx9	0.9645	5.8422e-11		Evl	0.4949	1.04024e-09		Ppfibp1	1.3915	5.07913e-16		Ahr
					Osbpl8	0.7379	2.76238e-52		Ldlrap1	0.306	1.3436e-11		Errfi1	0.961	1.14124e-28						Pik3cb	0.3431	4.31919e-15		Rps11	0.5213	4.25451e-28		Ctnna1	1.5128	5.65649e-60		Myo1f	0.6189	2.04061e-13		Blnk	0.6572	6.35763e-11		Cgas	0.2747	1.24156e-09		Igsf3	0.5	7.95007e-16		Mllt3
					Il10	0.5891	2.88983e-52		Dab2	0.3591	1.37205e-11		Gadd45a	0.3629	1.40075e-28						Calcrl	0.3516	4.78801e-15		Pls3	0.7881	5.14236e-28		Snx20	0.9549	2.04502e-59		Pmaip1	0.2643	2.33005e-13		Man1c1	0.7232	7.48924e-11		Bach1	0.9507	1.30666e-09		Sepsecs	0.3938	9.82106e-16		Runx3
					Mafb	0.5701	1.44115e-51		Ncoa2	0.312	1.73302e-11		Sirpb1c	0.3781	2.12847e-28						Igf2r	0.3103	5.04513e-15		Rpl9	0.5448	7.96994e-28		Rps11	1.0205	2.21156e-59		Adgre5	0.3803	2.38806e-13		Rnf150	0.7377	9.21205e-11		H2-T23	0.5914	1.53489e-09		Zw10	0.3764	1.00526e-15		Naga
					Atp6v1c1	0.4747	6.7409e-51		Grina	0.3165	2.27619e-11		Gbe1	0.6792	2.34629e-28						Sh3bp5	0.5558	6.62317e-15		Ptgs2	0.4095	2.76874e-27		Stk4	1.2164	2.62794e-59		Ifngr1	0.4217	2.75054e-13		Lipa	0.8503	9.48162e-11		Trim56	0.3645	1.63702e-09		Cyb561a3	0.4528	1.09808e-15		Psme1
					Ano6	0.615	6.76993e-51		Raf1	0.2969	2.4947e-11		Nampt	0.4641	2.64117e-28						Atp6v1b2	0.3914	6.77006e-15		Rpl24	0.5604	4.62685e-27		Pik3r1	1.757	4.66677e-59		Raf1	0.5637	4.19835e-13		Akr1a1	0.8154	1.02284e-10		Nfxl1	0.5184	2.6206e-09		H2-Aa	2.0753	1.34794e-15		Ckb
					Trf	0.4535	6.98031e-51		Tns3	0.2967	2.56376e-11		Cflar	0.4558	3.08308e-28						Fbxl5	0.7428	7.2464e-15		Timp1	1.2507	4.99975e-27		Map4k4	1.0454	5.05075e-59		Gfod1	0.4672	4.3902e-13		Rcbtb1	0.2891	1.06259e-10		Unc93b1	0.6829	3.00238e-09		Ighm	0.6844	1.4962e-15		Ece1
					Tmem176a	0.4678	1.03078e-50		Col4a3bp	0.3394	2.85519e-11		Rgcc	0.4986	3.1514e-28						Ahnak	0.4199	8.77866e-15		Cxcl1	0.5919	1.17795e-26		Sub1	1.0607	2.55673e-58		Syk	0.4353	4.47699e-13		Ttyh2	0.4182	1.34445e-10		Trim12a	0.4299	3.17021e-09		Eif2ak3	0.7653	1.84686e-15		Mthfd2
					Fos	0.86	1.15214e-50		Arhgap17	0.316	3.29329e-11		Slc16a3	0.4382	4.55079e-28						Lmna	0.4004	1.0086e-14		Tacc2	0.7257	1.55668e-26		Ass1	0.803	8.24181e-58		Gsr	0.7135	4.60091e-13		Ap2m1	0.8063	1.91709e-10		Ilrun	0.6448	3.76935e-09		Hist2h2ac	0.2905	1.95046e-15		Stat4
					Slc49a4	0.6057	2.25046e-50		Emp1	0.3259	3.60973e-11		Ms4a8a	0.364	4.6181e-28						Cfl1	0.3308	1.08707e-14		Pbx1	0.7163	2.2831e-26		Kif21b	0.5729	1.31959e-57		Rps4x	0.3557	4.83786e-13		Cd302	0.6351	2.3336e-10		C3ar1	0.7974	4.75474e-09		Lipe	0.7083	3.8487e-15		Gtf3c6
					Gnpda1	0.3235	3.78849e-50		Lrp1	0.3239	4.69025e-11		Abi1	0.7228	4.77893e-28						Mcl1	0.3753	1.11315e-14		Ccl4	0.4364	2.56433e-26		Relb	1.3092	1.57182e-57		Atp5e	0.399	5.60597e-13		Slc6a6	0.7059	2.6111e-10		Cd180	0.8697	5.3233e-09		Tasor2	0.9249	3.94019e-15		H2afz
					Eps8	0.6837	3.8796e-50		Tcf4	0.2606	5.15312e-11		Fbxl5	0.5895	6.58418e-28						Hdgf	0.3859	1.13678e-14		Ybx3	0.9025	3.54799e-26		Aebp2	1.2221	4.19444e-57		AI504432	0.4162	5.94901e-13		Laptm5	0.6422	2.77843e-10		Synj1	0.8008	5.95646e-09		Emp2	0.6268	4.11582e-15		Pde3b
					Lgals3bp	0.4536	7.15453e-50		Jarid2	0.3864	5.20467e-11		Rsbn1	0.5831	6.80438e-28						Mafg	0.3834	1.5005e-14		Tpt1	0.3907	3.69551e-26		Crybg1	0.8354	2.43423e-56		Rps5	0.3811	6.17772e-13		Man1a	0.9777	2.95435e-10		Npc2	0.6266	6.39227e-09		P2ry14	0.9306	4.62927e-15		H2afy
					Jmjd1c	0.5285	1.10048e-49		Fam193a	0.2894	5.62233e-11		Hspa4l	0.6827	6.92833e-28						Cat	0.4143	1.95117e-14		Ptma	0.5201	3.77736e-26		Snd1	0.9888	3.28706e-55		Crtc3	0.479	6.30481e-13		Ccpg1	0.4688	3.41691e-10		Clec4a3	0.7524	6.64029e-09		Mgll	0.2817	4.66735e-15		Batf3
					Tut4	0.554	2.04312e-49		Peli2	0.2553	6.52078e-11		Atp6v1e1	0.4123	7.59189e-28						Pilra	0.3423	4.27941e-14		Rpl19	0.5185	5.41557e-26		Cyfip2	0.4533	3.68399e-55		Trps1	0.546	8.91746e-13		Sdcbp	0.6336	3.55918e-10		Ms4a6d	0.7814	1.08023e-08		Tmco3	1.0434	5.49278e-15		Zfp169
					Lmbrd1	0.5232	3.68754e-49		Znrf1	0.307	7.66312e-11		Kdm7a	0.4408	1.05189e-27						Hspa1a	0.6422	4.53132e-14		Cd9	0.5556	6.20952e-26		Calm1	1.4043	9.93268e-55		Zbp1	0.2784	9.65207e-13		Pla2g15	0.6435	5.48102e-10		Casp8	0.5963	1.24844e-08		Asap2	0.9517	6.7592e-15		Tap2
					Lmbrd2	0.4106	4.13932e-49		Glg1	0.3556	8.68536e-11		Mif	0.3899	2.62156e-27						Atf4	0.541	5.26046e-14		Gapdh	0.5867	1.1178e-25		Arhgap26	1.3154	1.63167e-54		Tmem51	0.3734	1.02624e-12		Ndfip1	0.7023	5.60117e-10		C1qb	0.9719	1.39225e-08		Runx3	1.8652	6.96367e-15		Sub1
					B2m	0.3733	7.95691e-49		Eea1	0.3056	9.38271e-11		Myadm	0.4251	3.14987e-27						Zfand5	0.4309	6.10776e-14		Il1b	0.4003	1.86331e-25		Wnk1	1.6768	3.34558e-54		Rpl36al	0.4124	1.03708e-12		Nacc2	0.3718	5.80632e-10		Chmp4b	0.6932	1.43735e-08		Cst3	2.6004	7.34825e-15		Ccdc107
					Spag9	0.4886	8.11807e-49		Pde3b	0.3191	9.89481e-11		Clec4n	0.6129	4.28995e-27						Rai14	0.3549	6.96931e-14		Ggct	0.7839	1.96126e-25		4930523C07Rik	0.8168	5.70466e-54		Abi3	0.4575	1.28692e-12		Cd68	0.8644	5.85805e-10		Camkk2	0.6971	1.96091e-08		Ppm1g	1.1912	8.0452e-15		Tifab
					Tns1	0.4699	8.70057e-49		Pacs2	0.3303	1.10365e-10		Lpp	0.496	5.37334e-27						Ywhah	0.4769	7.48182e-14		Rpl4	0.689	2.93675e-25		Rcl1	0.5123	9.49593e-54		Rrp1b	0.386	1.29533e-12		Cfp	0.7522	7.86162e-10		Nampt	0.6847	2.32758e-08		Cracr2b	0.3679	1.00289e-14		Btg2
					Sulf2	0.3644	1.04241e-48		Golph3l	0.4213	1.16668e-10		Plek	0.4862	1.85238e-26						Rbpms	0.429	1.40683e-13		Elob	0.7559	8.36582e-25		Hat1	0.6755	1.31515e-53		Rpl29	0.3762	1.38979e-12		Psd3	0.8572	8.54726e-10		Mpp1	0.539	2.39925e-08		Prnp	1.345	1.21594e-14		Pkp3
					Trem2	0.5428	1.63443e-48		Atg4c	0.3392	1.19538e-10		Bcl2a1a	0.3086	2.58375e-26						Sqstm1	0.4033	1.98718e-13		Eef2	0.6252	9.2987e-25		Antxr2	1.1631	9.73384e-53		Pold4	0.2675	1.54911e-12		Hfe	0.5213	1.14389e-09		Slc28a2	0.5064	2.50911e-08		Lrrk1	1.6815	1.25133e-14		Shtn1
					Ythdf3	0.5151	2.03105e-48		Pde8a	0.3422	1.71388e-10		Areg	1.0878	4.77149e-26						Gclc	0.6502	1.99918e-13		Rpl3	0.5826	2.05429e-24		Stimate	0.4482	1.46496e-52		Irf7	0.3695	1.59113e-12		mt-Nd2	0.8598	1.22014e-09		Slc29a3	0.5329	3.87035e-08		Zcchc14	0.6991	1.25398e-14		Vrk1
					Ednrb	0.9168	2.2409e-48		Slc11a1	0.3008	2.14826e-10		Fam169b	0.3505	6.90306e-26						Bhlhe40	0.3709	3.11243e-13		Krt15	0.9015	3.22117e-24		Cntrl	0.6669	1.97346e-52		Rpl4	0.3261	1.95742e-12		Plxdc2	0.5717	1.22361e-09		Pik3ap1	0.8264	4.72018e-08		Pde4dip	0.9921	2.67723e-14		Phlpp1
					Hgf	0.3843	2.39427e-48		Crebbp	0.309	2.55549e-10		Stx11	0.4536	7.66281e-26						Afg3l2	0.3756	3.37573e-13		Nme2	0.7017	3.31203e-24		Tnip3	2.2147	2.06661e-52		Rps27rt	0.3306	2.32784e-12		Kif16b	0.7453	1.55991e-09		Ccnd1	0.6759	4.79534e-08		Tmeff1	0.5766	2.89612e-14		Parvg
					Adcy7	0.404	3.15766e-48		Cd14	0.3911	2.72939e-10		P2ry10b	0.2925	1.11203e-25						Dmxl2	0.3619	3.44241e-13		Rpl6	0.5266	4.60888e-24		Kdm2b	1.0252	2.93957e-52		Gcsh	0.354	2.7313e-12		Gatm	0.506	1.79253e-09		Stx16	0.6497	4.813e-08		Xpo4	0.6194	6.41023e-14		Sema3f
					Ttyh3	0.3052	3.53955e-48		Nol4l	0.2975	2.75642e-10		Abca1	0.3878	1.478e-25						Emp3	0.5349	3.67985e-13		Rps14	0.4419	6.37723e-24		Slc7a1	0.8802	3.31546e-52		Oasl2	0.3488	2.83882e-12		Mfsd6	0.5618	2.11403e-09		Sppl2a	0.8577	6.33767e-08		Il1rap	1.5463	6.97711e-14		Map3k9
					Cfb	0.3439	5.35028e-48		Mtmr3	0.3219	3.50536e-10		Rapgef1	0.5058	1.71494e-25						Actg1	0.4888	3.90928e-13		Naca	0.5848	7.79488e-24		Rpl21	0.8432	5.26795e-52		Malt1	0.5764	3.04908e-12		Rassf8	0.8007	2.83194e-09		Rnpep	0.5078	7.60416e-08		Gramd3	1.8398	8.7935e-14		Phf11b
					Mtmr12	0.4714	7.32702e-48		Plekhm2	0.3146	4.01322e-10		Sertad2	0.4727	2.53462e-25						Abr	0.3579	5.42492e-13		Sprr1a	1.0686	1.20486e-23		Cd274	1.555	1.09053e-51		Ppib	0.3434	3.14256e-12		Twf1	0.6544	3.17951e-09		Hk3	0.5497	1.16785e-07		Nr4a3	2.3849	9.01241e-14		Gdi2
					Vav1	0.4599	7.52858e-48		Vps13b	0.3353	4.85679e-10		Pik3r6	0.4565	5.11154e-25						Gsn	0.3898	5.43606e-13		Ppbp	0.9019	1.51709e-23		Akna	0.3627	3.18663e-51		Arl5c	0.4417	3.5055e-12		Sat1	0.9267	3.51522e-09		Psme2	0.457	1.45999e-07		Adamts9	0.6613	9.6253e-14		Bri3bp
					Arnt	0.4898	1.10804e-47		Flvcr1	0.3814	4.89717e-10		Tagln2	0.3959	7.85546e-25						Cd109	0.4618	7.55458e-13		Anxa8	0.7776	2.48153e-23		Cd52	1.301	5.82638e-51		Bin2	0.2866	4.0137e-12		Il4ra	1.0248	3.94752e-09		Lyn	0.786	1.57229e-07		Rassf5	0.6234	9.66428e-14		Tmsb10
					Irf8	0.3468	1.80744e-47		Kdm7a	0.2988	6.67115e-10		Iqsec1	0.4175	1.81427e-24						Tmem184b	0.3498	7.65798e-13		Nfia	0.7743	3.57068e-23		St3gal3	1.2832	6.05124e-51		Btf3	0.3521	4.88444e-12		Scoc	0.2763	3.98668e-09		Dbnl	0.4742	3.01719e-07		Macrod2	2.4747	1.28643e-13		Cycs
					Mdfic	0.4789	2.26561e-47		Tlr4	0.415	7.63098e-10		Ccdc71l	0.4177	1.9195e-24						Gpi1	0.4041	1.21615e-12		Ly6a	0.8238	6.3912e-23		Rps19	0.9147	9.39542e-51		Rpl7a	0.3767	5.14182e-12		Snx6	0.633	4.20587e-09		Ankfy1	0.4879	3.70092e-07		Lrba	1.3169	1.324e-13		Apobec3
					Il4ra	0.5906	1.50723e-46		Tle4	0.3276	7.8791e-10		Slc23a2	0.4747	2.2621e-24						Slc25a24	0.323	1.49644e-12		Ly6g6c	0.9914	8.59097e-23		Casc3	0.8091	1.20575e-50		Anxa11	0.5167	6.49721e-12		Man2b2	0.265	4.63123e-09		Ehd4	0.6205	3.72937e-07		Gcnt1	1.1738	2.21596e-13		Insyn2b
					Gadd45b	0.6688	1.5345e-46		Numb	0.2918	8.12194e-10		Bnip3	0.3925	4.85245e-24						Irak3	0.375	1.63029e-12		Fcgbp	0.9283	8.86406e-23		Acadm	1.0106	1.25999e-50		Zfp36l2	0.6079	7.57127e-12		Oasl1	0.7539	4.65719e-09		Cd52	0.9885	4.19283e-07		Epha2	0.3999	4.56384e-13		Sdf2l1
					Fnip1	0.5773	1.57119e-46		Gpat3	0.254	1.01211e-09		Ccl4	0.849	5.57402e-24						Itga1	0.3223	1.96461e-12		Rpl23a	0.5117	1.12396e-22		Fau	0.7387	2.84066e-50		Lztfl1	0.4064	8.50259e-12		Enpp1	0.4711	5.93624e-09		Ctla2b	0.4102	4.20071e-07		Ppp2r3a	1.4055	5.82801e-13		Snx20
					Fli1	0.5599	4.13044e-46		Myo1e	0.4937	1.06974e-09		Ptpn7	0.2894	7.56618e-24						Limd1	0.538	1.99476e-12		Hbb-bs	1.8933	6.97688e-22		Rin3	1.1757	3.98096e-50		Mrpl33	0.5234	1.13415e-11		Saa3	1.5576	6.10313e-09		Cd47	0.5206	4.90984e-07		Wdr47	0.417	5.93756e-13		Gnb4
					Slc6a6	0.4108	4.47534e-46		Dtnbp1	0.2785	1.08554e-09		Id2	0.5947	8.02869e-24						Fam162a	0.3794	2.16165e-12		Dynll1	0.8274	7.79869e-22		Rcsd1	1.197	1.68022e-49		Hnrnpa3	0.3575	1.17053e-11		Tmem106a	0.6641	7.5521e-09		Abcg1	0.6559	5.1618e-07		Tjp2	1.4522	6.56388e-13		Tap1
					Rbm47	0.4583	7.56705e-46		Gpnmb	0.5192	1.38674e-09		Spryd7	0.427	8.22609e-24						Spire1	0.3658	2.59414e-12		Ccl27a	0.8283	1.4827e-21		Fnbp1	1.0891	1.78099e-49		Nfkbie	0.3714	1.19297e-11		Snx5	0.6238	7.66659e-09		Snx2	0.7007	6.77751e-07		Phldb2	0.8932	9.93224e-13		Tmsb4x
					Exoc4	0.5485	1.45782e-45		Cacul1	0.2978	1.67703e-09		Slc31a2	0.3872	9.41963e-24						Hspa4l	0.3963	2.74453e-12		Cd81	0.7873	3.99358e-20		Foxp1	1.135	3.88937e-49		Ubxn4	0.356	1.23881e-11		Gstm1	0.7414	8.20661e-09		Dek	0.5994	1.21901e-06		Id1	0.3568	1.04473e-12		Rpsa
					Qk	0.5747	2.73915e-45		Hook3	0.259	1.78519e-09		Txnrd1	0.386	2.14427e-23						P4ha1	0.4613	2.76957e-12		Eef1g	0.6695	9.19751e-20		Arl5a	1.0927	2.2305e-48		Lilr4b	0.4862	1.37752e-11		Mtmr10	0.7948	1.02565e-08		H2-D1	0.488	1.27388e-06		Sesn2	0.4487	1.30124e-12		Mrtfa
					Galc	0.3956	2.94002e-45		Zfand5	0.2909	1.81543e-09		Trps1	0.4131	2.55616e-23						Apbb1ip	0.3445	3.69232e-12		Rpl31	0.5643	1.97457e-19		Uap1	1.1693	3.46372e-48		Braf	0.4254	1.66108e-11		Pde7a	0.7605	1.14509e-08		Tspo	0.6391	1.81472e-06		Tspan7	0.3989	1.90886e-12		Sp110
					H2-D1	0.364	4.74462e-45		Ldlr	0.3288	1.87428e-09		Ralgapa2	0.429	4.64562e-23						Pdlim7	0.2781	4.79154e-12		Calr	0.5756	2.48779e-19		Mbtd1	0.9069	4.0748e-48		Atp5h	0.3049	1.99589e-11		Ap1s2	0.4679	1.27127e-08		Cd72	0.6209	3.11134e-06		Ift43	0.3057	2.05814e-12		Pik3cg
					Ankrd33b	0.6793	4.95506e-45		Ero1l	0.2702	2.29002e-09		Klf7	0.5905	5.31815e-23						Ywhaz	0.3539	6.7449e-12		Csta1	0.8117	2.98261e-19		Stat3	0.946	4.38321e-48		Cyth3	0.5011	3.12184e-11		Hexa	0.6742	1.37052e-08		C1qc	0.7892	3.3634e-06		Large1	0.9163	2.3703e-12		Syngr2
					Elf2	0.4582	7.58246e-45		Kat2b	0.302	3.02409e-09		Aldoa	0.3968	5.95256e-23						Slc27a1	0.3274	8.9581e-12		Ust	0.5559	3.39961e-19		Gucd1	0.6067	8.52571e-48		Prdm1	0.4035	3.30471e-11		Rbpj	0.8788	1.58096e-08		Zc3hav1	0.6958	3.63599e-06		Spsb1	0.8161	2.96488e-12		Akap9
					Ccl7	0.7863	8.98786e-45		Itga1	0.2936	3.23211e-09		S100a11	0.3897	6.59464e-23						Mapk3	0.3679	1.38658e-11		Rpl36	0.5185	3.62326e-19		Nabp1	0.6895	1.04033e-47		Scand1	0.3331	3.4254e-11		Plbd2	0.559	1.80948e-08		P2ry12	0.3555	3.72297e-06		Dennd4a	2.0895	3.46048e-12		Lactb
					Mgat5	0.5633	1.62956e-44		Kansl1l	0.3432	3.37972e-09		Tnfaip3	0.4438	7.16583e-23						Ctsd	0.3187	2.09047e-11		Krt79	1.1028	8.81342e-19		Afdn	0.6141	1.87633e-47		Gm15726	0.7004	4.02121e-11		Rcan1	0.9908	1.82732e-08		Crybg1	0.51	4.50225e-06		Hist1h1b	1.0793	6.43621e-12		Rab39
					Tet2	0.4489	2.36959e-44		Plekhm1	0.3123	3.75453e-09		S100a6	0.3868	1.12781e-22						Cox17	0.4683	2.46582e-11		Ptges	0.6042	1.25707e-18		Lrrfip1	0.8229	1.88864e-47		Susd3	0.2762	4.12891e-11		Pld3	0.6991	2.23695e-08		Psme1	0.5373	4.85949e-06		Tmem154	0.4977	7.60804e-12		Txndc11
					Rassf3	0.4723	5.75785e-44		Nsmce2	0.2934	3.98222e-09		Lrmda	0.4136	2.15605e-22						Hilpda	0.378	2.60682e-11		Serf2	0.5776	1.3608e-18		Bcl2a1a	0.8578	3.91025e-47		Sra1	0.2999	4.49676e-11		Gns	0.6347	2.28209e-08		Mier3	0.2917	5.14267e-06		Rgs12	0.5133	7.76662e-12		Arih2
					Entpd1	0.5437	5.95685e-44		Ccnt2	0.272	4.30997e-09		Spry2	0.3041	2.78129e-22						Ubc	0.3638	2.95518e-11		Rpl34	0.4365	1.51871e-18		Bach2	1.6515	9.27571e-47		H3f3b	0.3672	5.56766e-11		Abca9	0.5137	2.39725e-08		Tnfaip8l2	0.2939	5.22186e-06		Cdca8	0.476	8.35157e-12		Ccnd3
					Snap23	0.4937	6.92604e-44		Ccl24	0.6834	4.32145e-09		Grk5	0.406	3.14925e-22						1700017B05Rik	0.4237	4.45635e-11		Eif5a	0.6662	2.25372e-18		Basp1	0.99	1.27494e-46		Tgm2	0.4211	5.66773e-11		Ifi27l2a	1.3303	3.08962e-08		Ogfrl1	0.4548	5.45579e-06		Uaca	0.3665	1.22369e-11		Lsp1
					Sbno2	0.4503	7.03492e-44		Klf10	0.2761	5.51498e-09		Calcrl	0.4318	3.31269e-22						Klhl21	0.3144	5.53463e-11		mt-Nd3	0.5083	3.69091e-18		Cystm1	0.4967	1.32754e-46		Gm47283	0.6572	6.08573e-11		Prkacb	0.5256	3.54319e-08		Csk	0.5292	5.88348e-06		Havcr2	2.0981	1.53173e-11		Zfp386
					Atp6v1h	0.5239	9.17328e-44		Atf7ip	0.3021	6.48507e-09		Aoah	0.5595	4.18774e-22						Slc35e4	0.2683	5.87427e-11		Rps27	0.4348	7.50796e-18		Pphln1	0.474	1.85198e-46		Map4k3	0.4591	7.00413e-11		Ap2a2	0.7154	4.06111e-08		Rap2c	0.6026	6.02085e-06		Jpt2	0.2751	1.55697e-11		Fam117b
					Prex1	0.4362	9.26325e-44		Nek7	0.298	6.61129e-09		Ifi203	0.4973	5.63369e-22						Alox5ap	0.379	6.04112e-11		AY036118	0.455	1.69064e-17		Bclaf3	1.0738	1.90101e-46		B3gnt5	0.3222	7.05558e-11		P2rx7	0.6543	4.62617e-08		Atp8a1	0.4786	6.36825e-06		H2-DMb1	1.5945	1.77628e-11		S100a11
					Cyth1	0.4808	1.40556e-43		Rybp	0.3638	6.87329e-09		Snx18	0.4128	7.47702e-22						Ptgfrn	0.2555	7.5916e-11		Rpl10	0.4952	1.73324e-17		Btg2	0.8118	2.69357e-46		AI839979	0.3964	7.30193e-11		Pikfyve	0.7497	4.81638e-08		Ly6a	1.2315	8.75106e-06		Mrpl50	0.3124	1.78605e-11		Atox1
					Mrtfa	0.2712	1.93801e-43		Mier1	0.2953	7.19806e-09		Lims1	0.396	8.3253e-22						Myo1f	0.396	1.14816e-10		Rpl27	0.4515	1.3556e-16		Plbd1	1.1146	5.15831e-46		Arpc1b	0.3323	7.46604e-11		mt-Nd6	0.523	5.92048e-08		Vrk2	0.5094	9.98366e-06		Arhgef12	0.9933	2.35637e-11		E230029C05Rik
					Slc11a2	0.3904	2.86855e-43		Map3k2	0.2563	9.73741e-09		Slc27a4	0.2574	1.38142e-21						Lpp	0.3627	1.16952e-10		Csf3	0.5603	1.51116e-16		Sp140	0.868	7.1752e-46		Dock5	0.4128	7.79607e-11		Prdx1	0.9564	6.52227e-08		Cd164	0.5008	1.03405e-05		Plet1	0.8434	2.37619e-11		Arsb
					Pld3	0.3898	5.0778e-43		Npepps	0.2826	1.02313e-08		Spaca6	0.3802	1.61078e-21						Cers2	0.3108	1.43318e-10		Hmgn1	0.7484	1.97949e-16		Psmb8	0.976	7.28274e-46		Gpr35	0.3512	7.96608e-11		Ap1b1	0.607	6.88373e-08		C1qa	0.8478	1.07001e-05		Rasa2	1.994	2.49036e-11		Mirt1
					Cpq	0.3427	7.51291e-43		Emb	0.2944	1.34375e-08		Lcp2	0.4008	3.3947e-21						Cast	0.3352	1.69919e-10		Sdc1	0.5613	2.34634e-16		Usp12	0.764	7.35191e-46		Rpl37	0.3475	9.07866e-11		2008-03-01	0.5033	7.01963e-08		Ranbp2	0.563	1.12288e-05		Gem	1.0308	2.58142e-11		Casp6
					Slc28a2	0.4302	2.23987e-42		Tmem164	0.277	1.55493e-08		Mocs1	0.2856	9.55377e-21						Psmd13	0.4133	1.88603e-10		Zeb1	0.3973	3.07448e-16		Srebf2	0.6908	7.40268e-46		Cox5b	0.3464	9.54422e-11		Cd99l2	0.3162	7.15905e-08		Lgals8	0.548	1.3936e-05		Wdr43	0.625	2.74003e-11		Inpp5d
					Pip4k2a	0.4767	2.36092e-42		Gns	0.2582	1.68759e-08		Cmklr1	0.2968	2.45745e-20						Cacybp	0.331	1.8874e-10		Rasal2	0.6664	1.19258e-15		Herpud1	0.5806	8.13707e-46		Macrod2	0.3818	1.02372e-10		Glb1	0.5923	7.68139e-08		Itm2b	0.5707	1.69818e-05		Prkcb	2.3406	2.99814e-11		Jak2
					Batf	0.3915	2.93802e-42		Dop1b	0.2843	1.79865e-08		Mfsd7a	0.3476	3.29197e-20						Fpr2	0.3798	2.11069e-10		Atox1	0.4761	1.72355e-15		Ezh2	0.6686	8.80525e-46		Arhgdib	0.3813	1.12403e-10		Abhd12	0.6784	1.03491e-07		Ccl8	1.5761	2.34641e-05		Cd72	1.0823	3.65957e-11		Gm49980
					Ppp1r12c	0.3542	3.43212e-42		Ifnar1	0.2681	1.80292e-08		Eno1	0.4043	5.3698e-20						Fam102b	0.4188	2.84713e-10		Ndufa4	0.7112	2.34209e-15		Slamf9	0.404	9.64123e-46		Psme2	0.2576	1.22391e-10		Ermard	0.3025	1.29959e-07		Gadd45g	0.4771	2.35785e-05		2610035D17Rik	1.276	3.9997e-11		Tmem131
					Sdc3	0.4048	3.95429e-42		Gab1	0.2883	1.91903e-08		Apbb1ip	0.5098	5.5935e-20						Bnip3l	0.297	3.25724e-10		Cxcl2	0.3638	4.29302e-15		Rnf8	0.5238	1.11922e-45		Lpin2	0.4785	1.54974e-10		Tbxas1	0.6064	1.37136e-07		Ms4a7	0.7224	2.80649e-05		Scp2	1.8266	4.44356e-11		Got2
					Slc16a6	0.3889	4.17842e-42		Slc37a2	0.2587	3.49857e-08		Il7r	0.3384	8.10027e-20						Nampt	0.3979	3.95233e-10		Atpif1	0.6214	4.95796e-15		Lrba	0.7071	2.16715e-45		H3f3a	0.2998	1.58632e-10		Pde2a	0.5038	1.69852e-07		Tmem176a	0.7179	3.00973e-05		Ptk2b	1.8273	4.62545e-11		Cmtm6
					Nipa2	0.4486	4.48792e-42		Nceh1	0.2821	4.37975e-08		Furin	0.3964	9.95823e-20						Ywhab	0.3624	4.17975e-10		Arg1	0.4507	7.88369e-15		Wipf1	1.2901	2.36026e-45		Txnrd1	0.488	1.63363e-10		Dab2	0.7173	1.81222e-07		Tmem219	0.4208	3.13674e-05		Ehd2	0.3034	5.57565e-11		Phc2
					5031439G07Rik	0.4367	4.73128e-42		Fyb	0.3322	4.49707e-08		Capg	0.3474	9.96905e-20						Carmil1	0.3565	6.24498e-10		Txn1	0.4936	8.61388e-15		Ncoa7	1.461	2.85861e-45		Trem1	0.3276	1.7193e-10		Scpep1	0.5981	1.84148e-07		Sgk3	0.4631	3.99367e-05		Actr1b	0.6865	5.64462e-11		Mri1
					Clec4a2	0.4477	5.76538e-42		P2rx4	0.262	6.24705e-08		Gpr141	0.2772	1.81583e-19						Adssl1	0.3137	6.36058e-10		Vcl	0.7198	1.55418e-14		Atrnl1	1.2818	3.21312e-45		Tpt1	0.2713	1.80882e-10		Shtn1	0.4018	1.94691e-07		Plcl2	0.7668	4.1024e-05		Fam234b	0.266	5.99572e-11		Adpgk
					Slc26a11	0.3412	5.79692e-42		A930007I19Rik	0.2819	6.47036e-08		Plaur	0.3452	1.87348e-19						Slc43a2	0.5005	7.44197e-10		Syne2	0.6853	2.13127e-14		Purg	0.4971	5.88973e-45		Rps29	0.2961	2.41991e-10		Hsp90b1	0.6776	2.02448e-07		Ist1	0.3827	4.29298e-05		Dgkh	1.8127	6.33131e-11		Etnk1
					Tmem106a	0.4008	6.77009e-42		Akt3	0.2625	7.89231e-08		Apoc2	0.4359	1.93457e-19						Mindy1	0.283	9.80568e-10		Wfdc17	0.8655	2.73509e-14		Synj1	0.902	6.25576e-45		Ptpn1	0.594	2.58555e-10		Tgfbrap1	0.3232	2.07069e-07		Dync1i2	0.5334	4.37033e-05		Eml2	0.3027	6.76347e-11		Arhgap15
					Slc16a7	0.3135	1.12014e-41		Nsd1	0.2799	7.90278e-08		Ppbp	1.2227	2.51229e-19						Map4k3	0.4031	1.19375e-09		Cd2ap	0.7898	3.18632e-14		Zfp106	0.8332	8.60569e-45		Filip1l	0.4062	2.75292e-10		Slc28a2	0.3662	2.53048e-07		Isoc1	0.3777	4.45001e-05		Kalrn	0.4134	7.15793e-11		Ptpn4
					Got1	0.4717	2.53249e-41		Osbpl9	0.2913	8.99209e-08		Lilrb4a	0.3135	3.292e-19						Tsc22d3	0.4128	1.35821e-09		Ifitm3	0.3907	4.09415e-14		Mcemp1	0.6645	1.80412e-44		Slc25a5	0.35	2.94923e-10		Naa80	0.3581	2.59193e-07		Rrbp1	0.4959	4.90212e-05		Lmtk2	0.7706	7.99625e-11		Nuak2
					Ralgps2	0.3349	4.28577e-41		Pstpip1	0.2597	9.23405e-08		Vav3	0.4087	3.91883e-19						Anxa7	0.3544	1.66577e-09		Actg1	0.2692	1.23531e-13		Mmd	0.8434	2.66341e-44		Hlcs	0.4282	3.0635e-10		Qk	0.5794	2.61005e-07		Tap2	0.3292	4.92121e-05		Chchd6	0.2946	1.01409e-10		Txndc15
					Aff1	0.5544	5.50602e-41		Nbr1	0.2994	1.05946e-07		Ywhag	0.3349	4.1178e-19						Fkbp1a	0.3243	1.75437e-09		Ccl6	0.6669	1.29604e-13		S100a4	1.355	2.90982e-44		Map2k4	0.3813	3.18359e-10		App	0.5627	2.9322e-07		Selenow	0.5657	5.30572e-05		Cd24a	1.1059	1.09655e-10		Gpd2
					Lifr	0.4795	8.67833e-41		Lyz2	0.3272	1.40295e-07		Rusc2	0.3502	4.51097e-19						Spop	0.3705	1.9463e-09		Rps9	0.3436	1.77537e-13		Rpl18	0.7936	3.19989e-44		Fcgr1	0.3968	3.20776e-10		Kif3b	0.3796	3.463e-07		Max	0.6708	5.32559e-05		Ank	1.3975	1.10554e-10		Slco3a1
					Cd68	0.5009	1.15715e-40		Myo9a	0.2832	1.40805e-07		F13a1	0.3187	7.45265e-19						Card19	0.2914	1.95603e-09		Elovl4	0.6865	2.36409e-13		Cdkn1b	0.6305	4.90785e-44		Eif4a1	0.3678	3.40625e-10		Cysltr1	0.4228	3.57121e-07		Gatad2a	0.5633	6.07873e-05		Nup35	0.3081	1.45646e-10		Gtf2e2
					Dnajc13	0.4322	2.58503e-40		Rbm5	0.3096	1.85117e-07		Egln3	0.4151	7.81842e-19						Zc3hav1	0.3973	2.08055e-09		Areg	0.573	2.49191e-13		Strbp	0.6739	7.0758e-44		Clec4n	0.4642	3.47266e-10		Smpdl3a	0.7083	3.66957e-07		Hspa5	0.6952	6.24646e-05		Mtmr4	0.4272	1.57904e-10		Hsdl2
					Tet3	0.4203	4.48968e-40		Nipbl	0.2535	2.07269e-07		Ptprs	0.3353	8.30999e-19						Tnfaip2	0.4656	2.09288e-09		Gsn	0.6563	3.161e-13		Rpl34	0.7604	7.66006e-44		Msra	0.4532	4.09786e-10		Cd63	0.5858	3.94891e-07		Ly6c2	0.6661	6.72757e-05		Prxl2a	0.4093	1.89343e-10		Plac8
					Rps29	0.488	7.78247e-40		Zfc3h1	0.3009	2.18332e-07		Arid5b	0.442	9.09113e-19						Ppp1r14b	0.3007	2.25316e-09		Asprv1	0.7285	4.2288e-13		Rps24	0.6852	7.85511e-44		Naip2	0.4595	4.15679e-10		Ptgr2	0.3264	4.25513e-07		Chpt1	0.3337	6.83066e-05		Plxnc1	1.4419	1.94381e-10		Ciita
					Clec4a1	0.4217	8.02991e-40		Smg6	0.3165	2.4132e-07		Atp2b4	0.3321	1.24571e-18						Sod1	0.395	2.46531e-09		Mif	0.4993	4.60682e-13		S100a11	0.9413	1.62454e-43		Serf2	0.3526	5.23499e-10		Anapc15	0.3211	4.76218e-07		Fcrls	0.5854	6.93094e-05		Map4k2	0.3938	2.06574e-10		Rps11
					Sirt2	0.3895	9.59887e-40		Tnpo1	0.3004	2.41778e-07		Ccdc88b	0.3245	1.59007e-18						Acsl1	0.2652	3.8169e-09		Eef1a1	0.3056	8.59692e-13		Rps16	0.7359	2.38354e-43		Cxcl16	0.6042	5.59156e-10		Cd164	0.5434	4.82578e-07		Plac8	1.1361	7.00458e-05		Hsd17b4	1.3148	2.21527e-10		Myo1g
					Nlrp1b	0.325	1.11193e-39		Nisch	0.2881	2.71401e-07		S100a8	0.2731	1.60954e-18						Esyt2	0.4909	4.09148e-09		Cox8a	0.5347	1.39208e-12		Ccdc88a	1.2997	4.3191e-43		Rtp4	0.264	5.86936e-10		Smim15	0.477	5.29671e-07		Frmd4b	0.4731	7.41286e-05		Bcor	1.4058	2.5678e-10		Rrad
					Hnrnpll	0.5013	1.22393e-39		Zdhhc20	0.2557	2.81757e-07		Gm48065	0.3055	3.40445e-18						Mctp1	0.3431	4.13585e-09		Rpl35a	0.337	1.55151e-12		Vopp1	0.6666	5.86243e-43		Srxn1	0.4025	6.13988e-10		Agfg1	0.615	5.57768e-07		Shisa5	0.4793	9.5358e-05		Nop58	0.5464	3.02907e-10		Sipa1l1
					Clta	0.437	1.42351e-39		Tmem65	0.365	3.7016e-07		Slc2a1	0.3696	3.98111e-18						Lrmda	0.4006	6.08718e-09		Uba52	0.5871	1.60701e-12		Clec10a	0.9304	6.19008e-43		Nuak2	0.3159	6.23193e-10		H2-K1	0.5366	5.91961e-07		Mxd1	0.7899	0.000122941		Afap1	0.5266	3.97292e-10		Gpr65
					Htt	0.478	1.45947e-39		Pan3	0.2599	3.78123e-07		Pten	0.4879	4.74498e-18						Slc44a1	0.2816	6.59278e-09		Sprr1b	0.8552	2.64644e-12		Rpl39	0.8215	9.0147e-43		Ero1lb	0.2919	6.60216e-10		Adam19	0.5024	6.12068e-07		Myd88	0.2745	0.000125648		Cd244a	0.6925	4.77443e-10		Arap2
					Cd300ld	0.4221	3.59677e-39		Tspan3	0.2992	3.92901e-07		Chd1	0.4272	4.78668e-18						Bcar3	0.3043	6.9321e-09		Il1a	0.7333	3.49762e-12		Ccser2	0.8947	1.14744e-42		Rps20	0.2968	6.78259e-10		Lrg1	0.4338	6.74256e-07		Bcl3	0.5243	0.000146624		Bmpr1a	0.6355	6.38755e-10		Cd52
					Ccr5	0.5513	3.67811e-39		Vps18	0.2614	5.22909e-07		Gas7	0.3472	5.28694e-18						Emp1	0.3081	9.4267e-09		Gja1	0.5623	3.74167e-12		Gosr2	0.6237	3.69791e-42		Zswim4	0.2942	8.06903e-10		Zbtb20	0.7751	7.12711e-07		Tmem176b	0.7009	0.000147683		Skint3	0.4362	6.77993e-10		Nr4a2
					Itgb5	0.4081	5.1112e-39		1700017B05Rik	0.2515	5.63123e-07		Prkar2b	0.3835	7.95775e-18						Tuba1b	0.3509	9.57032e-09		Dbi	0.6054	8.1483e-12		Elovl5	0.6259	4.79658e-42		Olr1	0.5333	8.43483e-10		Rab31	0.6171	7.36816e-07		Svbp	0.3355	0.00017248		Herpud1	0.7977	9.86976e-10		Gpr132
					Smad3	0.4086	6.63224e-39		Scarb2	0.2551	5.94361e-07		Klhl2	0.3636	1.11135e-17						Tmem167	0.3474	1.03653e-08		Fth1	0.3109	1.65775e-11		Auh	0.821	5.68311e-42		Gpr137b	0.5221	1.11307e-09		Bckdk	0.3075	7.97599e-07		Cmtm6	0.4423	0.000183903		E330020D12Rik	0.2902	1.1915e-09		Fgfr1op
					Marcks	0.4814	1.13454e-38		Prune1	0.2554	6.99853e-07		Pgd	0.3761	1.2002e-17						Surf4	0.3522	1.21702e-08		Rpl36al	0.4788	2.04193e-11		Cenpl	0.2836	7.72128e-42		Osgin2	0.2806	1.11654e-09		Acly	0.3939	9.0855e-07		Pik3cd	0.411	0.000187549		Hnrnpll	1.6799	1.21953e-09		Pafah1b3
					Zfp516	0.4637	1.40962e-38		Adap2	0.2879	7.15359e-07		Rnf128	0.252	2.37983e-17						Tmem30a	0.3753	1.31547e-08		Pkp4	0.6347	2.98008e-11		Vav2	0.4765	8.00562e-42		Bend4	0.567	1.18405e-09		G3bp2	0.602	9.22046e-07		Tlr7	0.4364	0.000193326		Srbd1	0.4066	1.41978e-09		Tut4
					Lacc1	0.3984	1.70337e-38		Mitf	0.2823	7.31646e-07		Pim1	0.3475	2.89558e-17						Atp6v0c	0.2675	1.34132e-08		Rpl37	0.3726	3.82845e-11		Rps7	0.7653	8.23974e-42		Slc3a2	0.3829	1.31028e-09		Smagp	0.2972	1.00772e-06		Azi2	0.436	0.00023658		Tead1	1.2792	2.0197e-09		Pycr2
					Arhgef6	0.2851	2.18273e-38		Kdm5b	0.2772	8.34081e-07		Osm	0.4185	3.34728e-17						Klf9	0.3249	1.64015e-08		Prnp	0.6255	5.05533e-11		Dhx57	0.4663	8.67788e-42		Fmnl1	0.2973	1.31891e-09		H2-D1	0.5007	1.06599e-06		Jpt1	0.4822	0.000257479		Mast4	1.7956	2.03785e-09		Rabgap1l
					Tent5c	0.3381	2.32219e-38		Galnt2	0.2659	8.83562e-07		Srxn1	0.4098	1.07376e-16						Creg1	0.4121	2.05018e-08		Anxa1	0.4995	1.48167e-10		Cd40	0.9073	1.04883e-41		Chp1	0.4113	1.35483e-09		Sgsh	0.292	1.07856e-06		Acer3	0.5499	0.000289065		Ndrg1	1.5528	2.11809e-09		Herpud1
					Tbc1d10a	0.2835	2.38208e-38		Ash1l	0.2961	9.1868e-07		Lrpap1	0.3312	1.86682e-16						Zfp36l2	0.5152	2.14049e-08		Cav1	0.3314	1.54191e-10		Pvr	0.7564	1.54048e-41		Flii	0.2897	1.39826e-09		Igfbp4	0.4846	1.1391e-06		Hck	0.4643	0.000297689		Lsr	0.7671	2.20365e-09		Gm20186
					Eif1a	0.4088	2.65786e-38		Rbpms	0.278	9.25574e-07		S100a10	0.3392	1.89626e-16						Mdh2	0.3771	2.54364e-08		2003-03-01	0.6279	1.6504e-10		Pot1b	0.5486	1.56256e-41		Npc2	0.3772	1.44935e-09		Cfb	0.4187	1.14121e-06		Irf9	0.306	0.000313122		Mxra8	0.291	3.28523e-09		Yars
					Rab8b	0.4607	2.77584e-38		Mllt10	0.3147	9.41436e-07		Slc11a1	0.3271	2.50316e-16						Igf2bp2	0.3714	3.1587e-08		Eif1	0.3452	1.97964e-10		Poglut1	0.5691	2.1331e-41		Spty2d1	0.2963	1.68626e-09		Serpinb8	0.5907	1.22591e-06		Tlk2	0.5842	0.000319602		Cd40	1.282	3.98264e-09		Stat2
					Mgrn1	0.3313	2.9285e-38		Plec	0.252	9.6279e-07		Cdk6	0.4689	2.92626e-16						Psma6	0.3536	3.34585e-08		Dst	0.4881	2.39213e-10		Chp1	0.7973	2.63653e-41		Atp5d	0.3181	1.84205e-09		Oxr1	0.8335	1.36424e-06		Tcf4	0.5324	0.000338311		Abcc4	1.4397	4.30516e-09		BC028528
					Nup98	0.4448	3.33062e-38		Zswim6	0.3067	9.84419e-07		Camk2d	0.4596	4.98013e-16						Cox6a1	0.3032	3.59858e-08		Rplp2	0.2846	2.40197e-10		Plxnc1	1.2551	3.84548e-41		Msrb1	0.4075	2.16207e-09		Dnajc3	0.5601	1.37194e-06		Mbd2	0.49	0.000340024		Elovl5	1.1255	5.69393e-09		Rpl14
					Lipa	0.4848	3.50975e-38		Emsy	0.2727	1.00411e-06		Itpripl2	0.3002	6.79122e-16						Tnfrsf26	0.3046	3.96644e-08		2310046K23Rik	0.6951	2.62878e-10		Fmnl1	0.5641	4.50809e-41		Pitpna	0.3863	2.4709e-09		Plek	0.6933	1.59449e-06		Csrnp1	0.3839	0.000389641		Vdr	0.6909	6.41191e-09		Dbnl
					Mfsd12	0.298	3.78399e-38		Klf13	0.2709	1.10669e-06		Nab1	0.3915	1.25669e-15						Psmd2	0.3379	4.6111e-08		Ifitm2	0.3812	3.07819e-10		Gm26510	0.5868	6.07839e-41		Nsa2	0.3065	2.87105e-09		Ankrd33b	0.716	1.60657e-06		Cndp2	0.4756	0.000474561		Plaat3	0.457	6.87867e-09		Pomp
					Lmo2	0.3193	5.90856e-38		Ep300	0.2885	1.19148e-06		Adam8	0.3034	1.45315e-15						Ptpn22	0.4716	4.88245e-08		Arhgef12	0.6451	3.14814e-10		Plac8	1.2102	6.89319e-41		Acp5	0.705	3.27465e-09		Dstn	0.5494	1.71523e-06		Apobec1	0.6314	0.000478152		Btg2	1.4504	7.84693e-09		Pkib
					Tmem8	0.3103	7.89749e-38		Atg7	0.2757	1.45239e-06		Hcls1	0.3161	2.29592e-15						Fbxo32	0.4329	5.65376e-08		Rora	0.6416	3.53471e-10		Aig1	0.8808	2.45022e-40		Atp5c1	0.2785	3.56823e-09		Anxa6	0.5127	1.72383e-06		Tmem106a	0.4972	0.000494677		Sh3bp4	0.6024	9.5781e-09		Antxr2
					Etv3	0.4209	1.08275e-37		Ubn2	0.2502	1.5099e-06		Itgb7	0.333	2.36955e-15						Abcg1	0.3687	6.08332e-08		Fau	0.2704	5.00943e-10		Hsf2	0.7657	3.74363e-40		Tbc1d9	0.5339	4.12356e-09		Tpr	0.595	1.80814e-06		Srgap2	0.5891	0.000541442		Ssbp3	0.5446	1.05531e-08		Mrpl18
					Fgd4	0.3975	1.91151e-37		Slc23a2	0.2941	1.65978e-06		Ralgds	0.2777	3.31105e-15						Ppbp	1.3892	6.43884e-08		Cox4i1	0.3746	7.36405e-10		Smchd1	1.2046	1.01509e-39		Gab2	0.3634	5.01182e-09		Trim26	0.3773	1.80873e-06		Xrn1	0.4391	0.000549168		Cdk1	0.2648	1.08497e-08		Ndufa4
					Cd180	0.3409	2.0323e-37		Castor2	0.3121	1.9849e-06		Cd302	0.3228	3.50417e-15						Ier3ip1	0.2909	6.44292e-08		Jun	0.4466	8.103e-10		Traf6	0.7292	1.03542e-39		Eif3k	0.2768	5.71208e-09		Crtap	0.3236	2.07161e-06		Cers6	0.5406	0.000567249		Egfr	1.0923	1.13461e-08		Trerf1
					Tgfbr1	0.5361	3.11824e-37		Nsf	0.3526	2.0188e-06		Pla2g7	0.3792	4.20782e-15						Ncf1	0.8047	6.68774e-08		Igf1r	0.5767	1.15833e-09		Cd86	1.1593	1.18829e-39		Spen	0.3074	5.83616e-09		Atp6v1a	0.6073	2.21487e-06		Bbx	0.5263	0.000587876		Bbs9	0.6254	1.14693e-08		Napsa
					Tank	0.6261	3.25767e-37		Por	0.252	2.03765e-06		Cers6	0.5477	4.72419e-15						Gmfb	0.3441	7.06688e-08		Lgals1	0.4866	1.32345e-09		Mllt6	0.6308	2.35978e-39		Arl4c	0.3624	6.63891e-09		Cgnl1	0.6791	2.22206e-06		Mrc1	0.761	0.000635722		Pik3r6	1.5798	1.20625e-08		Usp10
					Ctsa	0.3909	3.72108e-37		Atf1	0.2948	2.15159e-06		Rabep1	0.3475	4.7868e-15						Dap	0.2859	8.47463e-08		Sod2	0.4356	1.8132e-09		Rabgap1l	2.5289	2.65383e-39		Tmem176b	0.3651	6.95628e-09		Clec4a3	0.5519	2.8505e-06		P2ry6	0.4572	0.000643407		Cyld	1.782	1.24197e-08		Sinhcaf
					Atp13a3	0.4635	3.77186e-37		Agtpbp1	0.2943	2.72759e-06		Ggta1	0.3515	5.90149e-15						Bola2	0.33	9.18074e-08		Itga6	0.6814	2.06681e-09		Gfod1	0.6505	2.8184e-39		2310022A10Rik	0.2863	7.70017e-09		Mafb	0.7638	2.8871e-06		Atp10a	0.3105	0.000650107		Crim1	0.9719	1.27166e-08		Gpr68
					Ddx60	0.3111	3.87562e-37		Sema4d	0.2931	2.7909e-06		Mgst1	0.2722	6.2698e-15						Stom	0.3305	1.22882e-07		Map2k4	0.7159	2.14911e-09		Dennd5a	0.9108	2.98219e-39		Ftl1	0.3835	8.27472e-09		Slc48a1	0.5781	2.96297e-06		Pdgfc	0.5609	0.000664453		Hmgcs1	1.0939	1.33905e-08		Ppfibp2
					Syngr1	0.3263	4.66893e-37		Slc17a5	0.2614	2.8637e-06		St8sia4	0.4232	7.1933e-15						Capns1	0.3092	1.23955e-07		Itpkc	0.6267	4.21614e-09		Acsf2	0.3389	4.07864e-39		Smim3	0.2951	8.63917e-09		2009-09-01	0.5007	3.07319e-06		Scamp2	0.4048	0.000710936		Dst	2.1577	1.35073e-08		Dynll2
					Sirpa	0.3943	6.27046e-37		Itch	0.2516	2.88544e-06		Tnfaip8	0.3141	9.80693e-15						Ywhag	0.3218	1.40324e-07		Clmp	0.3175	8.18984e-09		Appl1	1.0413	4.30747e-39		Eif1	0.2906	8.87071e-09		St6galnac4	0.4962	3.07918e-06		Arid4a	0.4961	0.00080259		Serpinb9	0.5269	1.42378e-08		Dynlt1f
					Disc1	0.3145	6.40825e-37		Ankrd12	0.3123	3.03641e-06		Map2k1	0.3574	1.04358e-14						Krr1	0.4105	1.42898e-07		Gjb2	0.5991	9.11093e-09		Rps27	0.7589	6.46741e-39		Sf3b1	0.3064	9.6548e-09		Cst3	0.2997	3.122e-06		Clec12a	0.5264	0.00086024		Thumpd1	0.3409	1.43431e-08		Cyld
					Dennd4c	0.5336	7.44871e-37		Myof	0.2636	3.06101e-06		Map4	0.359	1.04761e-14						Srxn1	0.4232	1.51368e-07		Mmp8	0.5493	9.49883e-09		Srsf7	0.675	7.46195e-39		Alcam	0.6117	9.74517e-09		Gcnt1	0.309	3.15672e-06		Rtf2	0.3028	0.000887987		Nop56	0.5315	1.55221e-08		Vps37b
					Eif4e	0.5917	9.31901e-37		Armh3	0.2897	3.21141e-06		Sqstm1	0.3676	1.25018e-14						Egln1	0.2918	2.12671e-07		Ece1	0.596	1.23483e-08		Cst3	1.5491	1.20342e-38		Slc25a28	0.3488	1.033e-08		Nrp2	0.5734	3.32757e-06		Ms4a4a	0.3526	0.00095014		Txnip	1.2691	1.58569e-08		Uck2
					Entpd7	0.3839	1.02429e-36		Acsl4	0.331	3.39653e-06		Itgb2	0.3074	1.27668e-14						P4hb	0.3069	2.52023e-07		Btg2	0.6321	1.4011e-08		Cyld	0.7677	2.25059e-38		Tln1	0.3437	1.06929e-08		Pi4ka	0.6206	5.01939e-06		H2-K1	0.4797	0.000955866		Napsa	0.8072	2.22745e-08		Alms1
					Arrb2	0.3411	1.06414e-36		Arrdc3	0.2981	3.58478e-06		Mob3b	0.4505	1.54926e-14						Bsg	0.2809	4.69964e-07		Hmgcs1	0.6657	2.00184e-08		Dusp2	0.5824	3.08878e-38		Cox7c	0.3031	1.16516e-08		Ophn1	0.6499	5.13482e-06		Ptprc	0.4755	0.00101026		Cytip	1.5763	2.57667e-08		Eif2b2
					Tnfsf12	0.2674	1.07785e-36		2510009E07Rik	0.2558	3.64926e-06		Anxa5	0.2524	2.63275e-14						Vat1	0.2989	6.10279e-07		Herc4	0.6929	2.04021e-08		Rpl18a	0.6911	3.33669e-38		Slfn2	0.3797	1.1667e-08		Mat2a	0.7374	6.21821e-06		Clec4a1	0.4777	0.00115198		Malt1	1.9085	2.95353e-08		Madd
					Gab2	0.4235	1.16762e-36		Zfp407	0.2709	3.80058e-06		Gpr35	0.3411	2.87777e-14						Dock5	0.3134	6.13372e-07		Large1	0.4875	3.31267e-08		Cd200	1.2981	4.2658e-38		Ahr	0.4189	1.28079e-08		Fbxw7	0.7429	6.25313e-06		Pou2f2	0.4864	0.00115608		Aatf	0.552	2.97082e-08		Cnnm2
					Raph1	0.5029	1.77871e-36		Snx12	0.3622	3.96818e-06		Slc41a2	0.3502	3.76539e-14						Timm13	0.296	6.17237e-07		Ubb	0.3583	3.36727e-08		Stap1	1.209	4.31217e-38		H2afj	0.3573	1.31093e-08		Ms4a8a	0.3573	7.73819e-06		Arel1	0.2807	0.00139706		Top1	1.6295	3.26763e-08		Cystm1
					Atp6v0a1	0.32	3.23672e-36		Cd36	0.4643	4.97805e-06		Diaph2	0.4114	3.89177e-14						Fblim1	0.2565	6.80592e-07		Pf4	0.3272	3.88914e-08		Rps10	0.6745	4.80598e-38		Ifi209	0.3261	1.44115e-08		Frmd4b	0.616	8.08781e-06		Lpxn	0.5438	0.00141614		S100a11	1.3088	3.42763e-08		Rpl13
					Rab3gap2	0.4272	3.91104e-36		Nrf1	0.2569	5.99071e-06		Flna	0.3154	4.3509e-14						Nus1	0.2901	7.10643e-07		Sema3c	0.3332	4.22407e-08		Iscu	0.6073	6.99121e-38		Rps6	0.347	1.46548e-08		Gna12	0.5166	8.16547e-06		AB124611	0.368	0.00155246		Rps6ka1	0.4484	3.55716e-08		Rpl17
					Prkacb	0.3468	4.38049e-36		Sp4	0.272	6.26784e-06		Mtm1	0.3756	4.90688e-14						Lgals1	0.2841	8.0462e-07		Tubb4b	0.7155	4.55551e-08		Atad2b	0.6594	1.4289e-37		Slc15a3	0.3093	1.58068e-08		Scarb2	0.6232	8.40713e-06		H2-DMa	0.4824	0.00160884		Idi1	0.4672	4.00106e-08		Epb41
					Plpbp	0.3366	6.72176e-36		Pnisr	0.2527	6.61096e-06		Tpt1	0.2588	5.40027e-14						Azin1	0.3566	8.84839e-07		Hsp90ab1	0.3099	4.6697e-08		Rgs1	1.3847	2.05268e-37		Bax	0.2976	1.75734e-08		Hbegf	0.6951	8.73269e-06		Itpkb	0.5957	0.00170295		Nap1l1	1.3497	4.17757e-08		Cd24a
					Slc37a2	0.4933	7.8034e-36		Ncoa6	0.2868	6.93858e-06		Ecm1	0.2989	7.7151e-14						Lat2	0.3084	8.96395e-07		Atp5d	0.5516	5.37372e-08		Mpc1	0.7197	2.39496e-37		Eif5	0.316	1.82807e-08		Cd200r1	0.3089	9.631e-06		Eif4g3	0.499	0.00176338		Zbtb10	0.3093	4.43139e-08		Hist3h2a
					Mbnl1	0.4403	9.12843e-36		Slc12a6	0.2514	7.88596e-06		Map3k5	0.3504	1.15467e-13						Abcc1	0.2842	9.1193e-07		Cox6c	0.4276	6.14309e-08		Rbbp8	0.9962	2.94012e-37		S100a6	0.3934	1.84031e-08		Slc35f5	0.3609	9.6572e-06		Socs3	0.83	0.00181252		Ogfod1	0.4197	4.7021e-08		Rbm10
					Rreb1	0.487	1.06989e-35		Fam13b	0.2536	9.76404e-06		Emilin2	0.2843	1.25907e-13						Atp1b3	0.2917	9.53224e-07		Sptbn1	0.6951	6.99365e-08		Rps18	0.7641	3.44189e-37		Atp5g1	0.2648	2.67252e-08		Zfhx3	0.5736	9.66967e-06		Oxct1	0.6243	0.00198352		Osbpl7	0.2701	5.36418e-08		Bin1
					C3ar1	0.3855	1.16334e-35		Ptpra	0.2581	1.61893e-05		Sgms1	0.3221	1.3989e-13						Mt2	0.8118	9.87619e-07		Rpl7a	0.3928	8.71154e-08		Csf2rb2	0.7444	8.26621e-37		Slc39a14	0.4136	3.07771e-08		Wdr7	0.4032	9.81773e-06		Stxbp3	0.6728	0.00208786		Lpin1	0.3594	5.54739e-08		Mrpl42
					Trio	0.489	1.52231e-35		Mfhas1	0.313	1.75188e-05		Dock7	0.3646	1.6799e-13						Pomp	0.2846	9.98606e-07		Chchd2	0.3415	9.82194e-08		Adgrg6	1.5996	1.06937e-36		Uqcrq	0.278	3.12104e-08		Tmbim6	0.5747	9.82653e-06		Cd74	1.0375	0.00219387		Nod2	0.8409	6.42528e-08		Itga1
					Tiparp	0.5623	1.55636e-35		Wasf2	0.2544	1.78746e-05		Actg1	0.3335	1.83408e-13						Snx10	0.276	1.03614e-06		Atp5j	0.5846	1.03303e-07		Rpsa	0.6718	3.23277e-36		Rpl22	0.3065	3.17295e-08		Acap2	1.0288	1.01555e-05		Ythdf1	0.3704	0.00222194		Usp53	0.2528	6.79355e-08		Ndufb11
					Tbc1d14	0.3437	1.67588e-35		Odf2	0.2718	1.80831e-05		Rab11a	0.2564	1.84537e-13						Dtx4	0.2507	1.03665e-06		Prdx6	0.4488	2.4083e-07		Rpl27	0.6245	4.19608e-36		Basp1	0.3927	3.18875e-08		Scamp2	0.511	1.0693e-05		Irf1	0.3215	0.0025321		Cd9	1.215	6.81305e-08		Itgax
					Clec10a	0.3711	2.70869e-35		Ptbp2	0.267	1.86181e-05		Emp1	0.2615	2.01232e-13						Htatip2	0.2895	1.07018e-06		Gas5	0.5794	2.77945e-07		Ddx6	0.7394	1.08247e-35		Rab8b	0.343	3.70209e-08		Dhrs3	0.5341	1.12162e-05		Necap2	0.3693	0.00254539		H2afx	0.303	6.95513e-08		Etv6
					Bmp2k	0.3299	3.56946e-35		Pnpla7	0.2759	2.02231e-05		Prkar1a	0.2886	2.7667e-13						Ggh	0.3279	1.08223e-06		Ifitm1	0.4545	2.79378e-07		Rpl32	0.7544	1.09911e-35		Snrpg	0.262	3.77756e-08		Ccl12	0.3505	1.16642e-05		Trmt61b	0.3022	0.00257622		Irf4	0.6168	7.10976e-08		Coro7
					Map3k2	0.4012	3.71745e-35		Map3k3	0.2632	2.5089e-05		Nfkb2	0.289	3.03469e-13						Map2k1	0.2868	1.26321e-06		Rpl35	0.4125	3.46244e-07		Kdm6b	0.8566	4.03616e-35		Ppig	0.381	4.13159e-08		Hyal1	0.389	1.24783e-05		Grn	0.4942	0.00261524		Foxn3	1.3784	7.13871e-08		Gramd4
					Mcfd2	0.3597	4.12116e-35		Celf2	0.2585	2.56474e-05		Tmsb10	0.3798	3.04482e-13						Tollip	0.2628	1.4943e-06		Tjp2	0.6984	8.49187e-07		Cblb	1.4433	5.54728e-35		Chmp2a	0.2679	4.16667e-08		Vat1	0.656	1.31133e-05		Slc25a28	0.351	0.00291537		Adipor2	1.316	7.52085e-08		Chsy1
					Gla	0.3715	4.1981e-35		Zfand2a	0.2815	2.69518e-05		Rabgef1	0.2837	3.12394e-13						Rwdd1	0.2931	2.43297e-06		Phlda1	0.5449	8.64651e-07		Fancc	0.5295	6.03538e-35		Picalm	0.3004	4.40056e-08		Arhgap18	0.7181	1.33737e-05		Ptpn18	0.4268	0.00318847		Acox1	1.0244	7.57361e-08		Vars
					Tmem104	0.3026	4.505e-35		Rb1	0.2692	3.33148e-05		Slx4ip	0.4073	4.90419e-13						Mtdh	0.3379	2.44862e-06		Atp5b	0.4761	9.02236e-07		Uck2	0.8453	6.89031e-35		Chd2	0.3652	4.94179e-08		Mpp1	0.465	1.41415e-05		Creb5	0.4733	0.00361576		Lmna	1.4461	8.38449e-08		Ccr7
					Arhgap10	0.46	4.52535e-35		Kdm3b	0.2725	4.00861e-05		Tfec	0.3708	5.09669e-13						Hif1a	0.259	2.70489e-06		Dstn	0.4578	9.51558e-07		Mif4gd	0.4951	7.28828e-35		Ifi204	0.3835	6.05509e-08		Pttg1ip	0.5589	1.51482e-05		Tbc1d1	0.4995	0.00370769		Myo1g	1.2075	8.68703e-08		Gm36486
					Slc35f6	0.3231	7.62781e-35		Ms4a4a	0.3524	4.78907e-05		Saa3	0.9136	6.56189e-13						Ypel2	0.2892	2.88281e-06		Kdelr2	0.6719	9.99091e-07		Rpl19	0.6004	7.29433e-35		Hp	0.3881	6.08213e-08		Ms4a6b	0.3824	1.73394e-05		Irf2	0.638	0.00383166		Rif1	0.5392	9.43926e-08		Tbrg1
					Pde7b	0.5415	1.38509e-34		Tbc1d23	0.2936	6.79369e-05		Ezr	0.3255	7.1819e-13						Pla2g4a	0.2701	3.10312e-06		Srgn	0.3483	1.24295e-06		Rps13	0.7018	8.6592e-35		Ifrd1	0.4776	6.23936e-08		Atp6ap2	0.5986	2.15182e-05		4932438A13Rik	0.4328	0.00463914		N4bp1	1.3516	1.05792e-07		Hyou1
					Sec14l1	0.327	1.41917e-34		Setd5	0.2794	7.84842e-05		Cyfip1	0.2997	7.95187e-13						Cyb5r3	0.3204	3.16369e-06		Ppia	0.3108	1.55922e-06		Vps37b	1.1494	1.60415e-34		Retreg1	0.277	7.34835e-08		Lpin1	0.2556	2.44856e-05		Rab3il1	0.3897	0.00493753		Map3k14	0.9118	1.07789e-07		Atp5g1
					Rnf13	0.3659	1.47081e-34		Arhgap18	0.3041	8.64336e-05		Zbtb7a	0.2844	1.25528e-12						Hcls1	0.3354	3.2388e-06		Ier3	0.2624	2.26862e-06		Arid4a	0.5879	7.47785e-34		Vamp4	0.3164	9.93135e-08		Ube2g2	0.5638	2.45315e-05		Casp4	0.5139	0.00566501		Cyp51	0.5382	1.15453e-07		Bcl9
					Asph	0.621	2.96492e-34		Sgms1	0.263	8.78258e-05		Cd53	0.2884	1.7483e-12						Cycs	0.3026	3.25392e-06		Plxdc2	0.4896	2.48481e-06		Ssh1	0.8015	8.82386e-34		Fam107b	0.4336	1.12933e-07		Plk2	0.8127	2.64554e-05		Hmox2	0.3776	0.00572785		Acsl5	1.2395	1.15834e-07		Rpl32
					Epb41l2	0.423	4.19321e-34		Zfp638	0.268	9.79021e-05		Il1rn	0.6827	2.1865e-12						Mmp9	0.7028	4.20414e-06		Btf3	0.3961	2.68555e-06		H2afy	0.6468	1.70122e-33		Plxnc1	0.3252	1.28751e-07		Max	0.5029	2.75127e-05		D5Ertd579e	0.3302	0.00624072		Scap	0.4374	1.36798e-07		Mfsd6
					Cd48	0.3154	5.87371e-34		Zfp36l1	0.3495	0.000100321		Acsl4	0.3141	2.50536e-12						Glipr1	0.2573	4.63623e-06		Pmepa1	0.4745	3.179e-06		Rpl26	0.6535	2.00025e-33		Ifi205	0.502	1.37255e-07		Nav1	0.5497	2.83991e-05		Cds1	0.3332	0.00715753		Antxr2	1.4372	1.3708e-07		Vav3
					Tbc1d5	0.5005	6.06725e-34		Thbd	0.4112	0.000120308		Hck	0.35	2.69355e-12						Acp5	0.4271	5.5156e-06		Gm12840	0.4722	3.25128e-06		Hint3	0.3269	2.21911e-33		Eif3h	0.2941	1.46256e-07		Fermt3	0.4913	3.80468e-05		Nipa2	0.425	0.00731661		Gtpbp4	0.6332	1.37171e-07		Dna2
					Slc30a1	0.2506	6.32524e-34		Zfp292	0.2642	0.00014879		Foxn2	0.2807	4.30303e-12						AI662270	0.2884	5.5202e-06		Csnk1a1	0.3626	3.52559e-06		Pde3b	1.06	4.76168e-33		Tpd52	0.382	1.47908e-07		Fcgr3	0.6171	4.10064e-05		Ifitm2	0.4392	0.00756507		Zfp597	0.292	1.42413e-07		Cdkn1b
					Ndel1	0.4388	7.76943e-34		Tcp11l2	0.2505	0.000155089		Mtdh	0.3087	6.24831e-12						Pygl	0.2723	6.17441e-06		Tspan5	0.4358	3.97344e-06		Plekha5	0.4003	1.00884e-32		AU020206	0.3038	1.58009e-07		Rnase4	0.6419	4.59041e-05		Nceh1	0.5945	0.00909155		Lrrc42	0.3048	1.57362e-07		Actg1
					Mfsd11	0.2578	1.05164e-33		Usp34	0.2616	0.000187738		Ccl6	0.2641	6.24894e-12						Uqcrq	0.262	6.30626e-06		Rps21	0.2807	4.78603e-06		Nod2	0.5824	1.13692e-32		Ubl5	0.287	1.61461e-07		Fam234a	0.4151	4.66282e-05		Csf3r	0.4151	0.00941609		Stard4	0.3569	1.76386e-07		Rpl28
					2610507B11Rik	0.3055	1.11825e-33		Zfp608	0.2666	0.000251102		Dglucy	0.2615	6.74284e-12						Sowahc	0.3698	6.3304e-06		Uqcrh	0.3703	6.41415e-06		Gpr137b	0.7373	1.32682e-32		Arl6ip5	0.2788	1.67734e-07		Appl2	0.5394	4.77677e-05		Ms4a14	0.27	0.00962927		Top2a	1.4438	1.9667e-07		Stk38l
					H3f3a	0.3311	1.46999e-33		Nck2	0.3104	0.000253776		Mfhas1	0.339	8.08053e-12						Plk2	0.3939	6.48162e-06		Rpl22l1	0.5182	8.37536e-06		Cxcl16	0.9213	1.3364e-32		Gch1	0.3794	1.80253e-07		mt-Co2	0.5795	5.00461e-05		Actr2	0.3967	0.0100413		Zbtb46	0.3737	2.12585e-07		Txndc16
					Slc7a7	0.3203	1.90743e-33		Smyd3	0.3689	0.000295074		Ptprj	0.2832	9.46526e-12						Psmd11	0.3101	6.60682e-06		Aldoa	0.3274	1.00316e-05		Gtpbp1	0.4277	1.66454e-32		Baz2b	0.3483	1.81954e-07		Rnf130	0.558	7.53316e-05		Arhgap15	0.5077	0.0104483		Rgmb	0.3509	2.29834e-07		Ccdc12
					Stx12	0.3753	2.63433e-33		Chst11	0.3038	0.000344091		Rbm7	0.2668	1.5713e-11						Pdcd5	0.2601	6.6494e-06		Nfix	0.595	1.69253e-05		Rab3ip	0.3536	1.98522e-32		Nars	0.3214	2.12647e-07		Ddx3x	0.7748	8.07143e-05		Tnfrsf1a	0.3275	0.0106767		Tbrg1	0.6668	2.50909e-07		Ptcd2
					Dab2	0.4548	4.32621e-33		Arl15	0.4764	0.000352884		Anxa7	0.3128	1.6044e-11						Hspa8	0.4188	7.04006e-06		Bsg	0.4245	1.76515e-05		Apaf1	0.7733	2.77614e-32		Actg1	0.3168	2.57437e-07		Dnmt3a	0.4789	8.1744e-05		Mafb	0.9011	0.0107211		Tacc1	1.2882	3.42589e-07		Supt20
					Asah1	0.3604	5.51458e-33		Kat6b	0.3048	0.000417955		Rassf4	0.2899	1.70075e-11						Pttg1ip	0.2653	7.54729e-06		Uap1	0.4887	4.15776e-05		Arf4	0.6736	3.36245e-32		Gm31718	0.2794	2.58292e-07		2008-09-01	0.4713	8.28196e-05		Ctss	0.4211	0.0114863		Slc46a3	0.2869	3.56923e-07		Rpl18
					Vps37b	0.5395	7.37112e-33		Resf1	0.3323	0.000449767		Rab20	0.2828	2.17938e-11						Pde8a	0.3164	7.55422e-06		Myl12a	0.4466	4.52639e-05		Rps25	0.6291	3.956e-32		Lpxn	0.4519	2.60256e-07		Klf9	0.6266	8.81238e-05		Mafk	0.3345	0.0123547		Fhit	0.5972	3.6654e-07		Uvrag
					Fcgr2b	0.431	8.50313e-33		Virma	0.2556	0.00062657		A930007I19Rik	0.3581	2.44262e-11						Arpc2	0.2531	7.85468e-06		Map1lc3a	0.5802	4.89659e-05		Cep83	0.7168	5.06848e-32		Isy1	0.3343	2.73632e-07		Slc8a1	0.4784	9.24177e-05		B4galt5	0.5596	0.0128025		Phactr4	1.0692	3.72854e-07		Cdk14
					Samd8	0.4019	1.74338e-32		Foxo3	0.2543	0.000783912		Arl8a	0.2614	2.51643e-11						Tmed2	0.2603	8.14828e-06		Fgfr2	0.5524	6.16648e-05		Trim11	0.3142	5.19906e-32		Ifi207	0.3524	2.74248e-07		Pcyox1	0.2919	0.000112578		Dusp2	0.5009	0.0131819		Skp2	0.2693	3.95159e-07		Atpif1
					Dnajb6	0.421	2.08527e-32		Ifnar2	0.262	0.000968954		Ptpn12	0.2505	2.90931e-11						Calm3	0.299	8.1844e-06		Gnas	0.337	6.68049e-05		Baz2b	0.8207	6.99033e-32		Grk3	0.3194	2.82131e-07		Stxbp5	0.4232	0.00011665		Esr1	0.3058	0.0132215		Swap70	1.5239	4.01466e-07		Eef1b2
					Gns	0.3593	2.1779e-32		Gtdc1	0.4107	0.0013886		Rapgef2	0.3563	3.59964e-11						Grik3	0.2569	9.11211e-06		Atp5e	0.3941	9.39821e-05		Psme1	0.6514	7.54776e-32		Fos	0.3661	2.84961e-07		Dbnl	0.3847	0.000120847		Pltp	0.5761	0.0132613		Mfsd13a	0.2986	4.36418e-07		Lsm7
					Sft2d1	0.3299	2.63502e-32		Desi2	0.265	0.00165795		Tlr4	0.2822	7.25408e-11						Psmd4	0.3129	9.90669e-06		H2afj	0.5051	0.000106045		Rpl13	0.671	1.42944e-31		Clec4a3	0.2514	2.87931e-07		Tm9sf2	0.5046	0.000121358		Dync1h1	0.4046	0.0133753		H2afz	1.5366	4.59357e-07		Bbx
					Cenpa	0.2982	2.6751e-32		Rnf216	0.2562	0.00242938		Cggbp1	0.3261	7.40052e-11						Dync1h1	0.2919	1.15873e-05		Eif4a1	0.3057	0.000147757		Atox1	0.7387	1.45739e-31		Il10ra	0.2683	3.02029e-07		Fgd6	0.4437	0.000134451		Prr5l	0.2575	0.0133797		Prps1	0.3807	4.81339e-07		Ifngr1
					Itga6	0.3144	2.89368e-32		Phip	0.2615	0.00262983		Zc3hav1	0.3292	1.17924e-10						Pcna	0.2559	1.56114e-05		Prdx2	0.5252	0.000149242		Rpl12	0.7114	2.07485e-31		Thbs1	0.4763	3.54046e-07		Sh3pxd2a	0.388	0.00014169		Itga9	0.5466	0.0137765		Cd82	0.8872	5.06725e-07		Rps7
					Dyrk1a	0.4603	3.47079e-32		Esyt2	0.2878	0.00305667		Nedd9	0.3061	1.36558e-10						Emc7	0.3005	1.57854e-05		Mmp9	0.3688	0.000203767		Lnpep	0.6997	2.7225e-31		Manf	0.3552	4.40435e-07		Gm12840	0.5855	0.000147842		G3bp2	0.4327	0.0138178		Nr6a1	1.0784	5.10055e-07		Higd2a
					Dock1	0.3545	6.24805e-32		Maml2	0.3162	0.00529187		Lamc1	0.3292	1.45199e-10						Mcu	0.3234	1.58641e-05		Atp5md	0.4913	0.000252775		Zfp516	0.7313	2.98635e-31		Gm2000	0.2739	4.80256e-07		Fam3c	0.2684	0.000185641		Fos	0.6723	0.0138619		Ramp1	0.4058	5.8345e-07		Ass1
					Gna13	0.3433	8.90393e-32		Azin1	0.2565	0.00536089		Lpcat2	0.3589	2.29066e-10						Mid1ip1	0.2849	1.62339e-05		Thbd	0.3337	0.00037697		Pank2	0.5538	3.07512e-31		Tma7	0.2517	4.85904e-07		Gda	0.4665	0.000189632		Irf8	0.3908	0.0162354		Kif13a	0.8369	6.03458e-07		Jtb
					Scpep1	0.3489	9.03863e-32		Jun	0.3316	0.00570714		Prdx1	0.4807	2.77461e-10						Abce1	0.2508	1.63642e-05		Npm1	0.3113	0.000705173		Plekha1	0.7009	3.72955e-31		Pde3b	0.4992	5.3961e-07		Hs6st1	0.3822	0.000208664		Lbh	0.2627	0.0176382		Slc7a1	0.8315	6.60186e-07		Adipor2
					Man2b1	0.3676	1.04393e-31		Tcirg1	0.2549	0.00812345		Tmem184b	0.2591	2.78447e-10						Raf1	0.328	2.21881e-05		Lmna	0.318	0.00072133		Scaper	0.6835	4.35768e-31		Apoc2	0.3294	7.07534e-07		Cog7	0.2683	0.000211984		Tec	0.4239	0.0192904		Csf2rb	1.4969	7.52867e-07		Ext1
					Lrp12	0.6198	1.22339e-31		Rere	0.3271	0.00930379		Vasp	0.261	2.81094e-10						Cct8	0.2688	2.95609e-05		Ppib	0.5004	0.000935292		Ifitm2	1.0614	5.34772e-31		Csf2rb2	0.2779	7.20776e-07		Qdpr	0.3156	0.000215419		Clec2d	0.411	0.0197746		Gpr183	1.2866	7.63205e-07		Wipf1
					Fam219a	0.4969	1.45479e-31		Rngtt	0.2613	0.0109874		Ldha	0.2691	4.90455e-10						Zfp652	0.2646	3.66077e-05		Higd1a	0.5622	0.00111561		Rpl23	0.6009	5.96484e-31		Gan	0.3088	8.0026e-07		Tmem106b	0.3896	0.000217142		Rab11fip5	0.2539	0.0200195		Dlg2	0.3269	8.00911e-07		Dctn5
					Nufip1	0.423	1.64523e-31		Babam2	0.3156	0.0130374		Nr4a1	0.2553	4.92952e-10						Wdtc1	0.2525	3.9594e-05		Myl6	0.2511	0.0011163		Ube2e3	0.5923	9.45315e-31		Rpl22l1	0.2801	8.27641e-07		Mocs2	0.4192	0.000219258		Adap2	0.5012	0.0203881		Dipk1a	1.0096	8.17403e-07		Il1r2
					Atf6	0.4107	2.81531e-31		Akap10	0.2591	0.0186903		Tuba4a	0.2628	5.02785e-10						Tubgcp4	0.2734	4.14773e-05		Nr6a1	0.4359	0.0021381		Purb	0.7265	1.0096e-30		Hcls1	0.265	8.57511e-07		Tulp4	0.5745	0.000240941		Zcchc2	0.3792	0.0232645		Hip1r	0.2547	9.48006e-07		Unc119b
					Arhgef3	0.4733	2.9405e-31		St18	0.3292	0.0225691		Tcf7l2	0.2627	6.19961e-10						Fam214b	0.254	4.15095e-05		Sec61b	0.5223	0.00234537		Slc25a19	0.3355	1.03779e-30		Snx18	0.2715	8.94057e-07		Ninj1	0.5178	0.000243661		Coa5	0.2793	0.0252821		Tiprl	0.7109	9.6101e-07		Rps3
					Inpp4a	0.4226	3.17496e-31						Prr13	0.2523	1.07195e-09						Tubb6	0.3429	4.24356e-05		Sec61g	0.4271	0.00261923		Rest	0.6309	1.50528e-30		Son	0.2728	9.07696e-07		Scamp5	0.3086	0.000280421		H2-DMb1	0.4403	0.025325		Ppp2r5d	0.3135	1.06532e-06		A930006K02Rik
					Atp2b1	0.4372	4.16218e-31						Ddit4	0.2528	1.10207e-09						Psma2	0.2888	4.72436e-05		Uqcrq	0.4607	0.00288863		Uba52	0.6193	1.55809e-30		Gsap	0.4671	9.17177e-07		Hacd4	0.4569	0.000287119		Snw1	0.3542	0.0280547		Rin3	1.0059	1.06694e-06		Unc119
					Kctd12	0.4402	1.10473e-30						Clic1	0.2894	1.24128e-09						Pag1	0.3457	5.11498e-05		Gm2000	0.56	0.00423746		Gm6209	1.2404	1.57055e-30		Sik3	0.3048	9.48035e-07		Atp6v1h	0.7667	0.000290372		Zfas1	0.3989	0.0289583		Inpp4b	1.0057	1.17877e-06		Mapk13
					Ago2	0.4132	1.18351e-30						Ptpn23	0.2579	1.34245e-09						Gstm1	0.3021	5.41225e-05		Spink5	0.5386	0.00485237		Filip1l	0.6388	1.98152e-30		Cstb	0.4093	1.17021e-06		Arntl	0.5753	0.000295627		Cttnbp2nl	0.468	0.031878		Mllt1	0.4165	1.31899e-06		Mir142hg
					Adam9	0.3502	1.47474e-30						Itgav	0.3374	1.46653e-09						Spata6	0.2733	5.49909e-05		Cox7b	0.3865	0.00517635		Msi2	1.087	4.84825e-30		Ago2	0.3612	1.2091e-06		Exoc6b	0.5634	0.000342654		Irf5	0.2999	0.0354801		Stat5a	1.2112	1.32151e-06		Tm2d2
					Fem1b	0.4725	1.64941e-30						Slc12a6	0.3117	1.49134e-09						Bcl6	0.2598	6.26863e-05		Slc39a1	0.4972	0.00599223		Smim3	0.529	4.86843e-30		Prdm2	0.2938	1.23704e-06		Arl6ip1	0.4372	0.000363994		Hfe	0.2594	0.0355133		Scel	0.4477	1.36359e-06		Lnx2
					Gng12	0.4136	2.23193e-30						2011-09-01	0.3789	1.62323e-09						Glud1	0.291	6.48582e-05		Ssr4	0.5003	0.00613992		Rpl36	0.6198	5.04571e-30		Sp3	0.4271	1.37576e-06		Slc26a11	0.385	0.000379979		Dock8	0.354	0.0369331		Spata5	0.924	1.41011e-06		Smdt1
					Gramd1a	0.2768	2.29388e-30						Map3k20	0.3243	1.72092e-09						Nrp2	0.3135	6.56955e-05		Eif2s2	0.424	0.00659209		Psmb9	0.4166	8.75204e-30		Atp5md	0.2647	1.41633e-06		Pgm1	0.2882	0.000387957		Alpk1	0.4629	0.0371923		Tex30	0.364	1.46745e-06		Ssna1
					Hexb	0.4167	2.7142e-30						Alcam	0.3294	2.01711e-09						Edem1	0.2764	7.63514e-05		Serbp1	0.4145	0.00710602		Clasp2	0.9064	1.19336e-29		Arpc3	0.2784	1.42492e-06		Ccl9	0.6087	0.000393365		Ctsc	0.4644	0.0374744		Ckap4	1.0079	1.59249e-06		Taldo1
					Nfxl1	0.2556	2.73156e-30						Bcl6	0.3797	2.04827e-09						Spryd7	0.2623	7.97703e-05		Ctnnb1	0.4004	0.00720011		Rps15a	0.6206	2.23628e-29		Rab11fip1	0.3195	1.44359e-06		Rpn1	0.4704	0.00040001		Il4ra	0.6187	0.0381919		Slc25a4	0.6019	1.64245e-06		Ndufa6
					Ifi27l2a	0.6474	2.79606e-30						Cited2	0.331	2.0499e-09						Psma1	0.2533	8.35396e-05		Il13ra1	0.5292	0.00741496		Tap1	0.3884	2.39721e-29		Arrdc3	0.4308	1.54301e-06		Zyx	0.627	0.000401468		Lmnb1	0.5116	0.0407029		Rpl12	1.0665	1.71024e-06		Ifitm2
					Gm47283	0.3896	3.62276e-30						Adgrl2	0.5846	2.50506e-09						Dram1	0.287	9.0933e-05		Hdlbp	0.4376	0.00833821		Emd	0.4732	2.65206e-29		Gm46224	0.3559	1.59925e-06		Ak3	0.2877	0.000418055		H2-Aa	0.9231	0.0427647		Vrk1	0.8118	1.82995e-06		Sfi1
					Zfp667	0.2924	4.80645e-30						Atp8b4	0.2978	2.82742e-09						Frrs1	0.2868	9.39352e-05		Map1lc3b	0.3902	0.0108483		Rps3	0.6012	4.76807e-29		Arih2	0.2592	1.65962e-06		Vamp8	0.5226	0.000424623		Gm21188	0.2554	0.0435116		Usp1	0.5068	1.92062e-06		Rps5
					Aoah	0.3437	4.94401e-30						Arrdc4	0.2646	4.68191e-09						Psmd8	0.2867	0.000104933		Eif3h	0.4322	0.0156329		Foxp4	0.6315	4.88994e-29		Lin54	0.3348	1.9028e-06		Dbndd2	0.3128	0.000427543		Selplg	0.3157	0.0451084		Mark3	1.0364	2.25985e-06		Phactr2
					2310022A10Rik	0.2976	6.59803e-30						Tpm4	0.2872	4.78301e-09						Cds2	0.2585	0.000106851		mt-Nd5	0.2515	0.0206817		Myo10	1.1594	6.43649e-29		Tspo	0.3449	2.01659e-06		Agtrap	0.4966	0.000459786		Rnf139	0.3006	0.046081		Mcm7	0.2697	2.33233e-06		Fgd2
					Mxd1	0.5132	1.78153e-29						Zfp36l1	0.4342	4.78698e-09						Nfe2l1	0.2681	0.00011964		Cltb	0.5086	0.0240645		Btbd9	0.8606	8.55726e-29		Sgk1	0.4038	2.03872e-06		Necap2	0.5444	0.000464638		Cycs	0.4177	0.0469086		Tacc2	0.4452	2.40126e-06		Nt5c
					Cd72	0.3328	2.41075e-29						Ccdc50	0.2902	6.55726e-09						Tmbim1	0.2927	0.000125561		Ran	0.4461	0.0283693		Plekhg2	0.3892	1.18616e-28		Cox4i1	0.2509	2.08315e-06		Thbd	1.0145	0.000474043		Tle3	0.5514	0.0494411		Lrmp	0.638	2.47915e-06		2310058D17Rik
					Notch2	0.3826	3.45133e-29						Slc22a4	0.2743	7.09767e-09						Itpripl2	0.2706	0.000138636		Rps27l	0.3781	0.028527		Fryl	0.6448	1.38049e-28		Emb	0.3527	2.23344e-06		Hsbp1	0.7573	0.000482881						Apex1	0.2799	2.48236e-06		Gadd45gip1
					Pik3cd	0.2594	6.56025e-29						Vps13d	0.346	1.62957e-08						Tmem165	0.2793	0.000162875		Atp5h	0.3655	0.0288625		Fam110a	0.2822	1.68016e-28		Emp3	0.3077	2.25267e-06		Ms4a6d	0.5907	0.000483116						Cystm1	0.4088	2.73131e-06		Lamb3
					Mtss1	0.3924	6.61809e-29						Serpinb2	1.3199	2.14039e-08						Cdk2ap2	0.2514	0.000164562						Cish	0.374	2.03827e-28		Selenok	0.2797	2.2731e-06		5033421B08Rik	0.2952	0.000575651						Nfs1	0.4595	2.81046e-06		Rpl10
					Ncapg2	0.391	6.69585e-29						Eif4g2	0.2531	2.52391e-08						Slx4ip	0.2578	0.000202399						Itga4	1.8393	2.08346e-28		Gpr141	0.4136	2.52243e-06		Mindy1	0.4832	0.000578578						Ksr1	0.4946	3.27942e-06		Zfp597
					Cysltr1	0.3105	7.28782e-29						Dcun1d3	0.2702	3.03887e-08						Cxcl1	0.4404	0.000209427						Helz2	0.5517	2.5092e-28		Agpat4	0.3465	2.63423e-06		Lgals3bp	0.4779	0.000583927						Gar1	0.3293	3.30324e-06		Lmnb1
					Fem1c	0.3383	8.9665e-29						Ptgr1	0.3165	5.62683e-08						Zbtb7a	0.2723	0.000252968						Tuba1a	0.4832	2.55295e-28		Atp5l	0.2658	2.66238e-06		Xdh	0.607	0.000612759						Fkbp9	0.6235	3.6327e-06		Vdr
					Il6ra	0.3345	1.28379e-28						Pgam1	0.289	6.6933e-08						Arrdc4	0.2554	0.00026802						Smarce1	0.5181	3.10791e-28		Ppp1ca	0.2642	2.93884e-06		Eif4e	1.1903	0.000673859						Scd1	0.5718	3.68804e-06		Actb
					Gnl3	0.28	1.47796e-28						Vps4b	0.2569	7.22767e-08						Cct6a	0.2704	0.000268122						Eif2b2	0.2555	3.21401e-28		Gpcpd1	0.4531	3.07449e-06		Tcn2	0.628	0.000689169						Gpr171	0.3572	3.81958e-06		Spint1
					Serpinb6a	0.3104	1.60994e-28						Slc48a1	0.2534	8.97145e-08						Tkt	0.2763	0.000274329						Rps27a	0.6167	4.35077e-28		Trim30d	0.2585	3.08203e-06		Klf4	0.7192	0.000705367						Mettl16	0.2612	4.68448e-06		Oaz1
					Hdac5	0.3373	1.86905e-28						Nckap1l	0.2637	1.06118e-07						Gnb2	0.2603	0.00029515						Crtc3	0.7892	5.41151e-28		Itprid2	0.334	3.21972e-06		Xbp1	0.5086	0.000760923						Yap1	0.9952	4.84965e-06		Runx1
					Rab31	0.4762	3.24648e-28						Fndc3b	0.2532	1.12063e-07						Klf6	0.3066	0.000318638						F11r	0.352	5.69241e-28		Acer3	0.2898	3.40316e-06		Ltc4s	0.3189	0.000772623						Ccm2	0.8052	5.06525e-06		Atp8b2
					Fam49a	0.2858	3.49958e-28						Hgsnat	0.3713	7.04721e-07						Nav1	0.3122	0.000362219						Rpl30	0.5628	6.3492e-28		Pik3ap1	0.4534	3.5409e-06		Pxk	0.5532	0.000832316						Stk38l	0.8695	5.99459e-06		Tbp
					Ube2q2	0.4132	3.76757e-28						Hnrnph3	0.3339	1.03009e-06						Blvrb	0.3241	0.00038551						Baz1a	0.6188	7.7452e-28		Hmgb2	0.2987	3.56901e-06		Rsu1	0.4495	0.000834301						Selenoh	0.4562	6.10303e-06		Fbxo4
					Itpkb	0.4198	4.63441e-28						Rps6ka5	0.3121	1.69418e-06						S100a8	0.4902	0.000492068						Sema4a	0.447	9.24706e-28		Lrpap1	0.3294	3.91388e-06		Plekhm1	0.419	0.000871666						Net1	0.6438	7.08647e-06		Rpl19
					Plagl2	0.2933	5.22494e-28						Abracl	0.2579	2.84242e-05						Slain2	0.3049	0.000514321						Rps9	0.5356	1.14097e-27		Ppp2ca	0.258	4.04751e-06		Klhl9	0.4709	0.00087738						Ezh2	0.8725	8.50928e-06		Gyg
					Anxa11	0.3369	5.89725e-28						Myo1e	0.2556	0.000152754						Cnih4	0.2601	0.000557125						Tmem131l	1.1721	1.18989e-27		Vim	0.3577	4.25756e-06		Nmt2	0.398	0.000884534						Nop16	0.2504	8.56536e-06		Bach2
					Cd84	0.3311	5.91931e-28						Nr3c1	0.2593	0.000198722						Evi5	0.2614	0.000563709						Stxbp6	1.5184	1.47409e-27		Ik	0.3791	4.83873e-06		Add1	0.3858	0.000934646						Casp6	0.5576	9.1189e-06		Mrpl34
					Srgap2	0.4536	6.15932e-28						Ccrl2	0.368	0.000302223						Spcs1	0.2528	0.000894824						Rpl28	0.6118	1.59434e-27		Ctsz	0.3223	5.734e-06		Lmo2	0.4152	0.000978811						Pmvk	0.7421	1.01166e-05		Preb
					Apobec1	0.3682	6.84504e-28						Usp15	0.4358	0.00059451						Camkk2	0.3081	0.000897313						Rgs2	0.8429	1.78729e-27		Tut4	0.3081	6.15761e-06		Snx24	0.4099	0.000988045						Stau2	0.3164	1.04059e-05		Myl12b
					Rars	0.3065	6.96202e-28						Dst	0.5882	0.00834181						M6pr	0.2658	0.000941925						Papolg	0.2774	1.87895e-27		Fam114a1	0.3045	6.89638e-06		S1pr1	0.3983	0.00100294						Atpif1	1.0214	1.04432e-05		Kcnq1ot1
					Otulin	0.2843	8.54556e-28														Tuba4a	0.2502	0.000949361						Cmip	0.6069	2.18468e-27		Elob	0.2606	8.69667e-06		Mef2c	0.4009	0.00102014						Tmem245	0.5303	1.04757e-05		Timm8b
					Pacsin2	0.3452	9.33549e-28														Eif5a	0.2549	0.000984994						Rpl10	0.6883	2.56352e-27		Morrbid	0.4243	9.01041e-06		Cat	0.4559	0.00102659						Pdhx	0.2649	1.07825e-05		Cnn2
					Naa50	0.357	9.61396e-28														Mt1	0.6356	0.00102705						Coro1a	0.5734	2.56602e-27		Samhd1	0.553	9.59152e-06		Bbs9	0.3126	0.00104886						Cep85	0.2834	1.0823e-05		Ift172
					Ppp1cc	0.3066	1.31895e-27														Snx12	0.2596	0.00103476						Sh3bgrl3	0.6894	2.70961e-27		Crem	0.2662	9.74152e-06		Pea15a	0.5227	0.00109375						Vps13a	0.8244	1.19325e-05		Ctnna1
					Susd6	0.454	1.5306e-27														Gnptab	0.2703	0.00128904						Ttc7b	0.6827	3.58203e-27		Zfyve9	0.3198	1.0186e-05		Il11ra1	0.2962	0.0011168						Insr	0.9597	1.26501e-05		Psme2
					Coq10b	0.2912	2.02267e-27														Hsp90aa1	0.3472	0.00129957						Lrrc8c	0.6898	4.18836e-27		Sub1	0.2839	1.06675e-05		Cndp2	0.5264	0.00116049						Arhgap5	0.7827	1.27963e-05		Ndufa13
					Dnajb14	0.3032	2.32447e-27														Hist1h2bc	0.32	0.00139781						Cmc2	0.3472	5.03627e-27		Csf1r	0.2759	1.08539e-05		Cpne3	0.4232	0.00116124						Il18	0.8953	1.28025e-05		Gm26740
					Fam234a	0.3316	2.33622e-27														Sfxn3	0.2597	0.00141807						Chst11	0.8426	6.03359e-27		Vcan	1.1903	1.33287e-05		Pfkfb3	0.5842	0.00120994						Ptpn4	0.7358	1.35395e-05		Dennd5b
					Gapvd1	0.3114	2.41975e-27														Rhob	0.3148	0.00144644						Pcgf5	1.0925	7.0877e-27		Aprt	0.2763	1.35659e-05		Lbh	0.3176	0.00129774						Polb	0.9669	1.43021e-05		Rpl37
					Atp6v1d	0.3401	3.19065e-27														Pmepa1	0.2964	0.00151115						Foxo1	0.5493	7.6383e-27		Tpst2	0.2849	1.58931e-05		Ptpra	0.5083	0.00141344						Nol11	0.2837	1.44322e-05		Rpl27
					Rragc	0.3304	3.5528e-27														Rab32	0.2641	0.00163437						Mir142hg	0.7477	7.85454e-27		Pfdn5	0.2771	1.59511e-05		Prr13	0.5637	0.00143989						Adamts1	0.8714	1.48704e-05		Rab7b
					Ttc7	0.3145	3.78752e-27														2210408F21Rik	0.2841	0.00186655						Rpl14	0.6212	7.90905e-27		Slc11a1	0.3822	1.717e-05		Plod1	0.5635	0.00144012						Rprd1a	0.4365	1.5121e-05		Pot1b
					Nktr	0.4213	3.88255e-27														Emc10	0.2523	0.001869						Edem2	0.4285	8.96597e-27		S100a11	0.4104	1.86977e-05		4931406P16Rik	0.4698	0.00146269						Anxa11	1.2409	1.61247e-05		Sorl1
					Rasa4	0.3	3.9155e-27														Katnbl1	0.2633	0.00207139						Rnf24	0.5677	9.68169e-27		Foxn3	0.3305	2.15289e-05		G530011O06Rik	0.4078	0.00162704						Polk	0.4798	1.6821e-05		Slc33a1
					Chd9	0.3532	4.27662e-27														Mpp1	0.2691	0.00228496						Gng10	0.5434	1.08743e-26		Gm2a	0.2937	2.20542e-05		mt-Nd5	0.6327	0.00166047						Bcl2l1	1.1696	1.82035e-05		Gpat4
					Nptn	0.356	6.98614e-27														Snrpb	0.2505	0.00248024						Srrm2	0.5508	1.26043e-26		Fosl2	0.2705	2.20987e-05		Hsd3b7	0.2861	0.00180629						Dlc1	0.5683	1.8824e-05		Cenpa
					Mpp7	0.598	7.8625e-27														A930007I19Rik	0.2838	0.00275199						Nav1	1.0236	1.50931e-26		Cyth1	0.2512	2.34373e-05		Mrfap1	0.4731	0.00185596						Fgd3	1.1322	2.14297e-05		Rpl12
					Nfil3	0.3082	9.20608e-27														Vmp1	0.2848	0.00291659						Mapkapk3	0.6856	1.66758e-26		Gng5	0.2677	2.39613e-05		Tlr4	0.3138	0.0018828						Inpp5b	0.4427	2.21213e-05		Mdh1
					Rasgrp4	0.2843	1.26719e-26														Vdac2	0.3021	0.00302928						Srrm1	0.4878	1.71664e-26		Neurl3	0.3105	2.55035e-05		mt-Nd1	0.5041	0.00196419						Gsn	1.0201	2.23401e-05		Rpl39
					Tcf4	0.3283	1.32801e-26														Set	0.2624	0.00328405						Il1b	0.739	2.02702e-26		Smdt1	0.2574	2.62524e-05		Hspa1a	0.497	0.00212423						Htr7	0.5074	2.37138e-05		Txnl4a
					Fcgr4	0.2785	1.36565e-26														Smpdl3a	0.2629	0.00372794						Rapgef6	0.9645	2.06885e-26		Adora2b	0.2755	3.02704e-05		Fbxo3	0.3128	0.00253427						Rnf217	1.013	2.54757e-05		Usf3
					Rasgef1b	0.4117	1.4413e-26														Dbi	0.261	0.00457954						Mob3a	0.2901	3.29483e-26		Plekhg3	0.2652	3.10541e-05		Hip1	0.3864	0.0025598						Carmil1	0.7578	2.5865e-05		Snhg1
					Sh3glb1	0.2927	1.59456e-26														Ecpas	0.3507	0.00569092						Nfat5	0.7609	4.31398e-26		Uqcrh	0.2576	3.23301e-05		Dclre1c	0.396	0.00262209						Zkscan17	1.0485	2.61867e-05		Mta3
					Cd86	0.5152	1.78813e-26														Cpeb4	0.2945	0.00575032						Arl5c	0.7502	4.53648e-26		Gla	0.2585	3.40893e-05		Eri3	0.2923	0.00277231						Trp53	0.6243	2.70888e-05		Baz1a
					Asap1	0.4248	1.99137e-26														Stx11	0.264	0.00704443						Cdk12	0.5671	5.71848e-26		Sdc1	0.51	3.4212e-05		Stat5b	0.4727	0.00337387						BC005561	0.3415	2.77079e-05		Impdh2
					Vps13c	0.3437	2.13359e-26														Tmx4	0.2616	0.00706493						Sorl1	0.3823	8.05212e-26		Ttc19	0.2755	3.71272e-05		Mfsd11	0.3406	0.00339832						Pitpnb	0.6064	3.01355e-05		Rpl4
					Dennd4a	0.3682	2.29214e-26														Alas1	0.2769	0.00725225						H2-Q7	0.8412	9.55485e-26		Lncpint	0.3859	3.79395e-05		Uhmk1	0.3636	0.00348534						Bcl9l	0.2796	3.02625e-05		Rps18
					Ddhd1	0.4628	2.39872e-26														Adgre5	0.281	0.0102479						Smad7	0.5227	1.11264e-25		Nfe2l2	0.348	3.89225e-05		Asah1	0.4591	0.00354852						Sae1	0.4217	3.07886e-05		Mvb12a
					Tbc1d2b	0.3058	3.20944e-26														Tuba1c	0.2725	0.0106273						Tmcc3	2.0329	1.41336e-25		Gm13986	0.58	4.13498e-05		Uap1l1	0.3046	0.00378816						Fmnl1	0.7317	3.23616e-05		Rpl18a
					Tspan14	0.3721	3.36957e-26														Stk24	0.2633	0.0121712						Pik3r5	0.731	1.67981e-25		Atf7ip	0.2999	4.21229e-05		Wdfy3	0.4348	0.00396						Adam19	0.4156	3.2983e-05		Rpl30
					Aph1c	0.2995	3.59915e-26														Ccl3	0.5594	0.0146784						Rpl15	0.6035	1.96282e-25		Naca	0.2544	4.3054e-05		Zdhhc14	0.4466	0.00402981						Tnks	1.575	3.98208e-05		Rpl22
					Tm6sf1	0.3067	3.63478e-26														Slc31a2	0.2576	0.0158558						Vrk1	0.2999	2.21774e-25		Cox6c	0.2595	5.30972e-05		Snx2	0.4852	0.00450733						Mpp6	1.4743	4.11649e-05		Xxylt1
					Rel	0.2624	5.08849e-26														Hgsnat	0.2683	0.0267827						Ddt	0.6063	2.4278e-25		Rpl35	0.2541	6.2258e-05		Ap2s1	0.4885	0.00457669						Hist1h1e	0.8962	4.49133e-05		Atp8a1
					Hacd4	0.2778	5.38576e-26														Jun	0.2537	0.032982						Rpl11	0.5323	2.63824e-25		Mxi1	0.3432	7.36411e-05		Fut8	0.2729	0.00487565						Nubp1	0.482	4.56817e-05		Nap1l1
					Irf2bp2	0.3619	5.69594e-26																						Isy1	0.6037	2.75999e-25		Ldlrad4	0.3572	7.36575e-05		Cpq	0.2592	0.0049577						Ddx10	0.4436	5.68648e-05		Rps27l
					Tec	0.3805	6.24757e-26																						Gpr68	0.5193	3.93135e-25		Sp100	0.257	8.66909e-05		Trim25	0.6446	0.00502544						Cebpd	0.5425	6.30064e-05		Prmt1
					Fermt3	0.3241	6.66807e-26																						Lsr	0.25	4.0955e-25		Rala	0.3105	9.73232e-05		Cdc14b	0.3319	0.00503282						Gm42047	0.8354	6.71695e-05		Arhgap26
					Stx7	0.3282	7.1375e-26																						Supt4a	0.4619	4.60601e-25		Atp6v0c	0.2717	9.78513e-05		Fem1b	0.417	0.00536865						R3hdm1	0.773	6.95002e-05		Sec61b
					Hprt	0.2633	8.57069e-26																						Edil3	1.075	5.07948e-25		Entpd1	0.4929	0.000106051		Tnfrsf26	0.2827	0.00538426						Rogdi	0.3466	7.20748e-05		Rpl21
					Adap2	0.3347	1.04029e-25																						Arhgap45	0.6231	9.41777e-25		Mrpl52	0.2875	0.000120645		Slc12a6	0.5027	0.00552553						Dusp2	1.0445	7.27794e-05		Rpl3
					Ifi207	0.3375	1.06942e-25																						Hivep2	0.9295	9.95242e-25		Nfil3	0.315	0.000127216		Tmem59	0.4447	0.00582382						Hist1h4d	0.7184	7.35864e-05		Ppt1
					Bcl2l1	0.371	1.22736e-25																						Nfatc3	0.502	1.00456e-24		Carmil1	0.438	0.000130329		Cd2ap	0.4356	0.00628109						Gbf1	0.7257	7.40061e-05		Meaf6
					Akr1a1	0.3203	1.74731e-25																						Gpbp1	0.5779	1.0282e-24		Pde4b	0.3194	0.000131221		Ppp1cc	0.5719	0.00641921						Klf5	0.8803	7.70303e-05		Pbx1
					Kif13b	0.3452	3.05212e-25																						Csrp1	0.4728	1.25574e-24		Gab1	0.4077	0.000155933		Gm39469	0.3198	0.00643869						Hmgb1	1.3672	7.7149e-05		Arhgap45
					Map2k3	0.3375	3.10151e-25																						Kcnk6	0.3778	1.35638e-24		Prkce	0.4296	0.00015957		Slc25a24	0.2971	0.00657533						Cep83	1.0559	9.02437e-05		Rpl11
					Arap1	0.2862	3.51519e-25																						Il2rg	0.4258	1.36631e-24		Fars2	0.2729	0.00015958		Ogt	0.4817	0.00662743						Cd52	1.1651	9.08614e-05		Tm6sf1
					Bcl3	0.3352	4.80154e-25																						Nfkb1	0.6052	1.38341e-24		Rbks	0.2509	0.000163451		mt-Atp6	0.4341	0.00680462						Cnot6l	0.8331	9.29856e-05		Slc46a3
					Aopep	0.3624	5.08343e-25																						Arpp19	0.4052	1.80174e-24		Nufip1	0.3846	0.000176474		Cltb	0.2717	0.00699448						Sft2d2	0.4401	9.52975e-05		Rpl8
					Fnip2	0.3227	6.21968e-25																						A930015D03Rik	0.3642	1.84799e-24		Fyb	0.412	0.000208386		Rab14	0.4301	0.00704135						Parvg	0.2605	9.60583e-05		Srgap3
					Ubn1	0.2969	7.72724e-25																						Arih2	0.6141	1.93265e-24		Edil3	0.4914	0.000217791		Mtmr12	0.5293	0.00708158						Tpm1	1.0813	9.69708e-05		Elmod2
					Uvrag	0.3077	9.01318e-25																						Ptpn2	0.5521	2.15801e-24		Cdk17	0.252	0.000269119		Sft2d1	0.4147	0.00719465						Chd8	0.6299	0.000100597		Cd244a
					Bst2	0.2944	1.53071e-24																						Rassf3	0.7156	2.30066e-24		Gpalpp1	0.3624	0.000323039		Wnk1	0.3115	0.0077344						Dennd2c	0.8012	0.000101525		Neurl3
					Pikfyve	0.3347	1.69603e-24																						Mtor	0.3284	2.97737e-24		Sat1	0.3344	0.000389095		Plk3	0.2665	0.00803887						Arl14ep	0.3746	0.00010739		Dop1a
					Csf3r	0.3227	1.83154e-24																						Ube2h	0.7334	3.29137e-24		Cd300a	0.3704	0.000409312		Vezt	0.364	0.00845592						A930015D03Rik	0.524	0.000108018		Rnf157
					Hs2st1	0.3522	2.10948e-24																						Gvin1	0.3205	3.63452e-24		Aig1	0.2876	0.000428251		Nfam1	0.3182	0.0086523						Ube2o	0.2591	0.000111289		Pmvk
					Junb	0.5086	2.20827e-24																						Rps4x	0.6012	4.52545e-24		Calr	0.3344	0.000455256		Tmem86a	0.3007	0.00872389						Casc3	0.5662	0.000112289		Rps13
					Jund	0.4606	2.41682e-24																						Chd2	0.6292	4.79185e-24		Tmsb10	0.4645	0.000458485		Ctsh	0.4571	0.00886813						Fam129a	1.033	0.000137489		Calm1
					Pepd	0.3089	4.06269e-24																						Sik3	0.6122	5.22397e-24		Nupr1	0.2621	0.000573647		Sh3gl1	0.331	0.00901923						Med14	0.5157	0.000148065		Rpl10a
					Ncoa3	0.3856	4.16197e-24																						Uvrag	0.8367	6.14922e-24		Ppp2r5a	0.4005	0.000643102		Cdk8	0.3355	0.00953095						Jak2	0.9902	0.000154573		Srebf2
					Pcyt1a	0.2549	4.86349e-24																						Tmpo	0.3793	6.99214e-24		Snd1	0.2531	0.000672057		Gramd3	0.2706	0.00986121						Rbm4	0.3766	0.000156225		Syne1
					Vps26a	0.3209	5.62131e-24																						Tmem63b	0.4954	7.56853e-24		Apbb1ip	0.5391	0.000696555		Clic4	0.7515	0.00999257						Tbc1d16	0.2817	0.000167118		Tspo
					Pde2a	0.3124	7.2413e-24																						Rasa2	0.9178	8.2687e-24		Rac1	0.2616	0.00077632		Rpain	0.2718	0.0106547						Hmgn5	0.5966	0.000171316		Coro1a
					Odc1	0.6814	7.95939e-24																						Sdccag8	0.5468	9.58394e-24		Ftl1-ps1	0.2547	0.000786161		Bcar3	0.3475	0.0109179						Ptprg	0.7493	0.00017345		Ppp1r11
					Zfp36	0.4259	8.10196e-24																						Nrros	0.6721	1.31992e-23		Agtpbp1	0.2724	0.000892982		Bet1	0.2896	0.0110803						Rbm10	0.3726	0.000174525		Cd83
					Top1	0.3646	8.14391e-24																						Ms4a4c	0.5377	2.07879e-23		Tnrc6b	0.2651	0.000969927		Trio	0.514	0.01171						Pcsk5	1.2618	0.000185358		Mrps27
					Ctsh	0.322	8.43987e-24																						Lztfl1	0.4916	2.15971e-23		Ell2	0.2632	0.000975315		Atp6v1g1	0.3953	0.0122475						Gnai1	0.6859	0.000198364		Gpcpd1
					Tnpo1	0.3065	1.08889e-23																						Vasp	0.496	2.50035e-23		St3gal1	0.3129	0.000983145		Klhl7	0.3199	0.0124216						Abce1	0.4471	0.000199406		Rbbp8
					Gpcpd1	0.4121	1.1356e-23																						Phf12	0.4621	2.61038e-23		Sipa1l1	0.448	0.000993841		Ctso	0.2511	0.0129942						Dop1a	0.5455	0.000201988		Rps2
					Wdr91	0.2794	1.49789e-23																						Ggta1	0.7513	3.02109e-23		Pnrc1	0.28	0.00106462		St6gal1	0.2917	0.0133208						Rbm27	0.6658	0.000204855		Slc25a12
					Casp4	0.3733	1.50113e-23																						Rsf1	0.5204	3.53955e-23		H2-Q7	0.3177	0.00113909		Ankrd50	0.2913	0.0134209						Gpatch2	0.378	0.000210467		Exosc8
					Laptm4a	0.2938	2.09307e-23																						Fbxl20	0.6122	4.9458e-23		Fem1c	0.2673	0.00122814		Adh5	0.2789	0.0137277						Acad8	0.2711	0.000222329		Aagab
					Klhl7	0.2872	2.52011e-23																						Fgfr1op	0.3428	7.56018e-23		Myom1	0.2516	0.00162146		Tspan5	0.7609	0.0138865						Zfp868	0.3691	0.000224828		Tmem160
					Necap2	0.263	4.44205e-23																						R3hdm2	0.6004	7.70091e-23		Adap2	0.3082	0.00200697		Lgals9	0.3433	0.0148446						Pcyt2	0.3532	0.000253765		Rps4x
					Fbxw7	0.4231	4.51991e-23																						H2-T23	0.4044	8.9918e-23		Id3	0.3636	0.00260174		B4galt6	0.4466	0.0155863						Sel1l	1.1182	0.000266491		Nup214
					Epn1	0.252	5.16393e-23																						Zmynd15	0.6792	1.00789e-22		Asph	0.3683	0.00360879		Sbf2	0.5262	0.0156782						Bloc1s2	0.418	0.000295337		Anp32e
					Nasp	0.555	5.71898e-23																						5330438D12Rik	0.2526	1.02565e-22		Alpk1	0.3229	0.00376415		Plxnb2	0.3701	0.0157004						Sap30bp	0.3033	0.000296003		Tasor2
					Mef2d	0.3336	6.26326e-23																						Aftph	0.5613	1.4453e-22		Mdfic	0.2752	0.00400723		Cebpa	0.3465	0.0169607						Dock5	0.8528	0.000333825		Ankrd44
					Hpcal1	0.3139	6.87265e-23																						Mark3	0.4092	1.48844e-22		Pdia3	0.3144	0.00408282		Msrb1	0.4371	0.0171613						Cenpa	0.8137	0.000339287		Arid5a
					Id3	0.289	7.73436e-23																						Baz2a	0.4245	1.50769e-22		S100a10	0.3163	0.00408388		Otud7b	0.3587	0.0175						Fkbp5	0.6626	0.000345983		Tmem131l
					Fcgr3	0.3067	8.65813e-23																						Atmin	0.3032	1.61933e-22		Spi1	0.2587	0.00518883		Snx30	0.3095	0.0182361						Madd	0.5197	0.000354074		Rps24
					Snx27	0.3465	1.03312e-22																						Rpl27a	0.4567	1.83537e-22		Lgals8	0.2501	0.00621393		Sptssa	0.3804	0.018402						Slco3a1	0.7453	0.000363235		Bin2
					Xpr1	0.3338	1.20194e-22																						Mrpl52	0.4965	1.86486e-22		Fam117b	0.3095	0.00630115		Galnt1	0.4106	0.0185468						Ormdl2	0.3483	0.000373539		Tbc1d31
					Mxi1	0.4652	1.2236e-22																						Kdm5c	0.4893	1.94393e-22		Nceh1	0.3232	0.00668773		Dhrs7	0.2661	0.0190387						Gramd4	0.5812	0.000392926		Pa2g4
					Efhd2	0.2712	1.42327e-22																						Gm16599	0.4534	1.98628e-22		Rgs1	0.3025	0.00771922		Osbpl11	0.5299	0.0193416						Rps2	1.0196	0.00039749		Magoh
					Ugcg	0.3602	2.30853e-22																						Acvr2a	0.6203	2.05243e-22		Plcb1	0.9159	0.00794939		Bsg	0.4808	0.0196557						Gse1	0.9634	0.000399683		Plscr1
					Hip1	0.2666	2.46373e-22																						Dnm1l	0.5391	2.27085e-22		Slc22a4	0.2959	0.00864341		Glmp	0.3879	0.0219132						Akap8	0.4983	0.000414724		Crem
					Cep170	0.3083	2.48525e-22																						Actg1	0.5823	2.34443e-22		Hck	0.2529	0.0112416		Vwa5a	0.4733	0.0235186						Foxo1	1.0309	0.000423786		Agpat3
					Ilf3	0.2665	2.89995e-22																						Zfp217	0.3448	2.71236e-22		Nedd9	0.7781	0.0135766		Rfk	0.2942	0.0242166						Rbm4b	0.3582	0.00043591		Mbtd1
					Csrnp1	0.3572	3.49711e-22																						Rpl17	0.5	3.07294e-22		Runx1	0.4528	0.0143981		5031439G07Rik	0.4654	0.0248306						Acsl3	0.2939	0.000470892		Gm16599
					Srrm2	0.3058	3.99486e-22																						Rplp0	0.5256	3.58434e-22		Ankrd44	0.363	0.0150525		Gja1	0.5968	0.0248429						Mfsd6	0.8796	0.000486566		Pts
					Camk1d	0.2572	6.1783e-22																						2010315B03Rik	0.2922	4.5313e-22		Pdia6	0.2711	0.0175086		Tmem30a	0.3902	0.0264151						Ptms	0.9643	0.000491464		Tmem50b
					Wdfy2	0.3189	1.53642e-21																						Rps5	0.4998	5.30505e-22		Mecp2	0.266	0.0185231		Atp6v1b2	0.4233	0.0268842						Stmn1	1.2975	0.000503777		Csf2rb
					Etv6	0.2983	1.63363e-21																						Ric1	0.8862	5.69456e-22		Dhx40	0.2555	0.0216059		Stab1	0.636	0.0307773						Ddx27	0.5446	0.00052036		Rps10
					Appl2	0.2733	1.68029e-21																						Acot7	0.2995	6.52283e-22		Kpna4	0.4316	0.0262208		Plau	0.3427	0.0312426						Gm48678	0.3706	0.00053675		Pptc7
					Ccrl2	0.4136	2.91419e-21																						Rspry1	0.4715	7.53004e-22		Dleu2	0.5613	0.036072		Atp6ap1	0.3955	0.0329663						Ndufa4	0.8726	0.000548525		Trappc12
					Ell	0.3169	4.93923e-21																						Supt6	0.4049	8.33529e-22						Leprot	0.4779	0.0363579						Ube2s	0.8299	0.000575877		Ufl1
					Trpm7	0.2964	5.92409e-21																						Rpl35a	0.4568	9.72219e-22						Hk3	0.3874	0.0371164						Immp2l	0.9444	0.000581941		Acot7
					Iqgap1	0.2779	6.24897e-21																						Havcr2	1.0182	9.84767e-22						Arhgap21	0.2975	0.0382886						Fyttd1	0.7251	0.00058602		Med17
					Usp37	0.2784	7.32449e-21																						Fgr	0.8451	1.0623e-21						Adam15	0.433	0.0389202						Naga	0.6186	0.00059472		Ocstamp
					Scamp1	0.272	7.88309e-21																						Spint2	0.2751	1.15958e-21						Laptm4a	0.3652	0.0394532						Usp10	0.5556	0.000610401		Trim30a
					Plekho1	0.263	7.9348e-21																						Prpf38b	0.4828	1.18021e-21						Mpp5	0.473	0.0396324						Tuba1b	1.3368	0.000632126		Gm40645
					Rsbn1l	0.3307	1.0148e-20																						Nsa2	0.4474	2.18149e-21						Slc25a1	0.2912	0.0414264						Trmt61b	0.412	0.000640489		Uba52
					Kdm6a	0.3654	1.1634e-20																						Ccm2	0.4047	2.20607e-21						Ifi207	0.501	0.0417717						Tmem64	0.2675	0.000677272		Fgd3
					Fam172a	0.3211	1.60872e-20																						Mvp	0.4735	2.22654e-21						Vamp3	0.3132	0.0472532						Stk17b	1.2121	0.000688415		Avpi1
					Mpeg1	0.3619	1.8274e-20																						Stat2	0.332	2.37892e-21						B2m	0.3789	0.0482967						Utp6	0.4379	0.000693842		Rpl27a
					Ctsd	0.3626	1.92492e-20																						Myo1b	0.4015	2.83086e-21														Naa60	0.4203	0.000697899		Dusp5
					Sde2	0.3414	1.94851e-20																						Gm47283	0.9286	2.96661e-21														Polg	0.5072	0.000725295		C2cd5
					Ndfip1	0.2598	2.062e-20																						Sp110	0.3793	3.49053e-21														Ppfibp2	0.6404	0.000744795		Crip1
					Tnfrsf11a	0.3244	2.2067e-20																						Rps21	0.4995	4.39207e-21														Mrtfa	1.1148	0.00078891		Sema4a
					Gm26740	0.4415	2.26791e-20																						Sec61b	0.6433	6.36666e-21														Myo1b	0.3928	0.000810783		Khk
					Baz2b	0.3408	2.27598e-20																						Kmt2b	0.2531	7.9525e-21														Sdk1	0.3744	0.000813382		Alyref
					Lin54	0.3307	2.47058e-20																						Ifngr1	0.8168	8.238e-21														Exosc7	0.277	0.000834402		Sp100
					Pxk	0.3228	3.58196e-20																						Etnk1	0.4545	8.45694e-21														Snx25	0.6124	0.00084709		Cdc14a
					Tob2	0.3701	4.27766e-20																						Ssr4	0.5018	8.5809e-21														Dnajc1	0.8294	0.000860527		Commd6
					Gm6377	0.2587	6.00661e-20																						Rps14	0.4521	9.20351e-21														Abhd2	0.4753	0.000923506		Traf1
					Tcp11l2	0.2906	6.75163e-20																						Txndc11	0.3448	9.24821e-21														Trmt112	0.54	0.000929825		Spon1
					Rab1a	0.338	7.44613e-20																						Dip2b	0.7447	1.13937e-20														Ctnna1	0.9399	0.000932691		Atp5d
					Cttnbp2nl	0.3142	7.48677e-20																						Sod1	0.5678	1.19481e-20														Kpna1	1.0156	0.00104885		Ermp1
					Spi1	0.3037	7.49042e-20																						Ndufa6	0.523	1.32377e-20														Rpl22l1	0.8263	0.00107369		Auh
					Erp29	0.2506	7.68445e-20																						Tnip2	0.5025	1.40099e-20														Tcerg1	0.6026	0.00107679		Eva1b
					Scaf4	0.2736	9.11537e-20																						Tpm1	0.6893	1.4367e-20														Slc25a12	0.5138	0.00112304		Net1
					Acer3	0.3593	1.16095e-19																						Map3k3	0.5023	1.57026e-20														Hmgcr	0.6654	0.00115119		Rpl15
					Ranbp2	0.2851	1.36634e-19																						Stk11	0.3175	1.78987e-20														Srsf7	0.9153	0.00123053		Olfm1
					Pi4ka	0.3313	1.72359e-19																						Rpl22l1	0.5406	1.95184e-20														Ap4m1	0.3736	0.00127074		Gps1
					Snx30	0.2987	1.97581e-19																						Malat1	0.5033	2.46337e-20														Atp5g1	0.788	0.00129648		Irak4
					Trak1	0.282	2.06485e-19																						Mthfd2	0.3317	2.60938e-20														Tec	1.1104	0.00133707		Casc3
					Rab7	0.2664	2.06681e-19																						Mtmr1	0.3581	2.72962e-20														Nfyb	0.3146	0.00133813		Abhd17a
					Chmp4b	0.2818	3.16561e-19																						Rpl37	0.499	2.89154e-20														Hagh	0.2847	0.00140895		Arid4b
					Cyth4	0.2908	3.17947e-19																						Wasf2	0.4663	2.91986e-20														Ybx3	0.8277	0.00143946		Ubac2
					Phactr2	0.2977	3.61924e-19																						Gas5	0.4967	3.02462e-20														Lclat1	0.3936	0.00145741		Serf2
					Sh3bgrl	0.288	4.04234e-19																						Rps20	0.4561	3.02737e-20														1700025G04Rik	0.5445	0.00150247		Mfsd10
					Cfh	0.4957	4.0941e-19																						Med13l	0.5674	3.07732e-20														Parp3	0.2839	0.0015174		Sec61g
					Itgb1	0.2912	4.32255e-19																						Psme2	0.6962	3.27075e-20														Stk11	0.5765	0.00152956		Ezh2
					Taok3	0.287	4.92084e-19																						Mgat4a	0.454	4.73038e-20														Erf	0.37	0.00156585		Hfe
					Calm2	0.2885	8.58658e-19																						Tctex1d2	0.385	5.23086e-20														Pvt1	0.4267	0.00173946		Aph1c
					Arl6ip1	0.2551	1.01227e-18																						Arhgef2	0.4473	5.60127e-20														Med26	0.251	0.001831		Mcm6
					Ifngr2	0.2685	1.07929e-18																						Huwe1	0.5893	6.24744e-20														Hmgn1	0.7065	0.0019436		Rps23
					Iqgap2	0.3179	1.28757e-18																						Rps23	0.4683	6.30957e-20														Rhoq	0.7974	0.00195243		Me2
					Rap1b	0.2537	1.35971e-18																						Stk17b	0.7115	7.58277e-20														Klhl7	0.5694	0.00198309		Rps26
					Plekhm2	0.2705	1.40425e-18																						Pde7a	0.4355	8.54379e-20														Grk3	0.9162	0.00199381		Zfp106
					Dusp2	0.3373	1.40795e-18																						Rpl35	0.5795	1.05332e-19														Ifi202b	1.103	0.00209319		Trim12c
					Plekho2	0.273	1.42995e-18																						D8Ertd738e	0.475	1.06092e-19														Avpi1	0.7375	0.00226356		Arpc5l
					Snx3	0.287	1.45378e-18																						Csnk1g1	0.5145	1.29375e-19														Arfgap3	0.5174	0.00227968		Rpl23
					Spata5	0.2807	1.97916e-18																						Hax1	0.3358	1.35212e-19														Trim35	0.4031	0.00229253		Gosr2
					Gnaq	0.27	2.22414e-18																						Rps27rt	0.38	1.50307e-19														Gon4l	0.5609	0.00232304		Rps27a
					Ints6l	0.2998	3.15715e-18																						Pfdn5	0.4247	1.85223e-19														Smdt1	0.9393	0.00242235		Rps25
					Gtdc1	0.3992	3.95827e-18																						Def6	0.2999	1.85572e-19														Ryk	0.2881	0.00243816		Prcp
					Tent2	0.2919	4.03455e-18																						Zhx2	0.527	2.09675e-19														Srebf2	0.7542	0.00244285		Ifi205
					Itsn2	0.2888	4.75852e-18																						Ppm1g	0.3882	2.14364e-19														Suclg1	0.5264	0.00249667		Dock5
					Cd300c2	0.2849	5.37221e-18																						Ubxn7	0.4968	2.42745e-19														Sipa1l3	0.6116	0.00258752		Abca3
					Rb1	0.2915	5.51653e-18																						Ncoa2	0.5872	2.89957e-19														Uck2	0.9196	0.00272747		Ppme1
					Plcl2	0.3444	6.67746e-18																						Eef1b2	0.4833	3.5209e-19														Oat	0.5322	0.00272949		Rap2a
					Elovl5	0.2947	1.20098e-17																						Rpl9	0.4432	3.92979e-19														Prpf4b	0.8748	0.0027605		Sdccag8
					Clcn4	0.255	1.21444e-17																						Rps29	0.4853	3.98938e-19														Ssbp2	0.8337	0.0028759		Rps6
					Kdm6b	0.2721	1.45073e-17																						Rpl10a	0.5036	4.57548e-19														Rell1	1.3716	0.00293487		Vps9d1
					Npc1	0.2802	1.56894e-17																						Atp5d	0.4574	5.70682e-19														Cish	0.4035	0.00305378		Nck2
					Hpse	0.2744	1.59252e-17																						Donson	0.3151	6.49471e-19														Lmbrd2	0.6023	0.00312763		Pak1
					Ppm1h	0.2595	1.77501e-17																						St3gal4	0.9681	7.28614e-19														Fdps	0.5389	0.00313943		Park7
					Dip2b	0.2674	1.91569e-17																						Stat6	0.3731	8.50646e-19														Smc2	0.4143	0.00350405		Tomm70a
					Arhgap25	0.2561	1.93806e-17																						Rpl38	0.4581	9.99056e-19														Mxd4	0.4336	0.00354314		Sipa1l3
					Ccnl1	0.3096	4.10176e-17																						Slc38a9	0.4056	1.04469e-18														E130308A19Rik	0.5227	0.00356468		Rps15a
					Osbpl11	0.3237	4.28298e-17																						Alg9	0.2932	1.09732e-18														Smim3	0.8074	0.00381535		Rpl9
					Pias1	0.2571	4.33813e-17																						Arl3	0.285	1.14762e-18														Rfc1	0.4608	0.00390014		Mrpl58
					Cacul1	0.2757	5.575e-17																						Eya3	0.4558	2.6013e-18														Zfp414	0.3006	0.00408558		Fam98c
					Dock8	0.2873	6.04481e-17																						Flrt3	0.7359	2.8598e-18														Phlpp1	1.0457	0.00412013		Slc12a9
					Gab1	0.3829	6.84634e-17																						Zfc3h1	0.6752	3.29695e-18														Trp63	0.9792	0.0042379		Fli1
					Dync1li1	0.3424	7.87365e-17																						Tasor2	0.3449	3.45512e-18														Osgin2	0.5441	0.00426299		Hlx
					Lrp1	0.2894	8.4178e-17																						Fam117b	0.6151	3.71269e-18														Fam110a	0.3752	0.0042682		Mpp6
					Tom1	0.2534	8.76264e-17																						AA467197	0.4971	4.26307e-18														Scd2	0.4753	0.00451796		Cox5b
					Gpnmb	0.569	1.07595e-16																						Nub1	0.3536	5.5207e-18														Il7r	0.8958	0.00470787		B3gnt5
					Btbd1	0.2748	1.17143e-16																						Parp8	1.0619	7.17269e-18														Tmem11	0.4336	0.0047407		Rad17
					Atf3	0.3743	1.37549e-16																						Pdgfb	0.3209	7.2792e-18														4921524J17Rik	0.3125	0.00488055		Arid4a
					Pola1	0.2603	1.71877e-16																						Ppp4r3b	0.3436	7.57357e-18														Enah	0.7587	0.0050371		Rnf167
					Ifrd1	0.3461	2.34339e-16																						Nrip1	0.6582	8.48466e-18														Mbip	0.3497	0.00592883		Magohb
					Ptms	0.2594	2.78725e-16																						Rps6	0.4662	9.40657e-18														Tmcc3	0.8315	0.0059845		Setd7
					Dock2	0.2806	3.43215e-16																						Rpl4	0.4657	9.76754e-18														Mlec	0.4932	0.00602205		Akna
					Zfc3h1	0.2777	4.62023e-16																						Snrpg	0.3823	1.05777e-17														Ppp1r11	0.4933	0.00607139		Snrpe
					Ddi2	0.2717	4.63424e-16																						Scyl2	0.3995	1.12586e-17														Gnas	0.7999	0.00608919		Car5b
					Synj1	0.2642	5.09813e-16																						Arhgap30	0.4797	1.13244e-17														Mink1	0.483	0.00620369		Ssh2
					Scmh1	0.2775	6.92816e-16																						Hs6st1	0.3488	1.16286e-17														Hcar2	0.2855	0.00665151		Rpl35a
					Pi4k2a	0.2662	7.4302e-16																						Snx14	0.4156	1.42553e-17														Ppid	0.375	0.00666127		Hspa14
					Apc	0.2635	8.13361e-16																						Clec2d	0.5099	1.46634e-17														Tnip1	1.1378	0.00672965		Zfr2
					Wdr7	0.2515	8.57828e-16																						Arhgap28	0.6762	1.47864e-17														Gcnt2	1.1086	0.00694956		Osgep
					Atp6v1b2	0.2692	8.68539e-16																						Stat1	1.2118	1.60555e-17														Myo1e	0.9049	0.00698333		Rpl36al
					Jdp2	0.3863	9.42182e-16																						Smap2	0.4372	2.25502e-17														Tmem29	0.2772	0.00706885		Med27
					Sec24a	0.3302	9.76934e-16																						Gm11808	0.2795	2.43964e-17														Lactb	0.6525	0.00713466		Ssr4
					Mon2	0.2782	1.12917e-15																						Bzw2	0.4183	2.46713e-17														Ipo9	0.4796	0.0073903		Slc25a19
					Abcg1	0.2817	1.57064e-15																						Srsf3	0.4264	2.53721e-17														Zmynd15	0.8839	0.00751661		Msi2
					Antxr2	0.4707	1.60767e-15																						Swt1	0.3678	2.69197e-17														Slc35e4	0.3879	0.00768651		Dusp4
					Itprid2	0.2826	1.84351e-15																						Srgn	0.4621	2.95577e-17														Nt5dc3	0.5823	0.0078323		Rtn1
					Snx13	0.3013	1.96177e-15																						2005-03-01	0.3229	3.44001e-17														Trim36	0.3989	0.00787662		Rplp0
					Atad2	0.2717	2.44687e-15																						Large1	1.0914	3.87e-17														Pa2g4	0.3966	0.00810522		Elovl5
					Atp6v0d1	0.2571	3.22096e-15																						Fbxo11	0.6149	4.72469e-17														Rpl15	0.7903	0.00938035		Fmnl1
					Traf3	0.3645	3.26807e-15																						Cstf3	0.4012	4.94046e-17														Mki67	1.2829	0.00962131		Fdps
					Smyd3	0.3517	3.33022e-15																						Smad4	0.5256	5.60773e-17														Gtpbp1	0.257	0.00981966		Ero1lb
					Cxcl16	0.2676	3.60589e-15																						Kdm3b	0.4144	6.76463e-17														Trp53inp1	0.3854	0.00987104		Ppib
					Gpr137b	0.2672	4.23833e-15																						Taok3	0.5535	1.02455e-16														Casp8ap2	0.5139	0.0100626		Pfkp
					P2rx4	0.2808	5.8146e-15																						Rps26	0.3851	1.83461e-16														Upf1	0.4415	0.010332		Baz2b
					Eps15	0.2598	7.0417e-15																						Atg16l2	0.2648	2.08746e-16														Fam49a	1.0348	0.0116444		Cyth4
					Slmap	0.2845	8.93274e-15																						Polr2a	0.3247	2.08909e-16														Kdm5a	0.6041	0.0117408		Ndufb9
					Prdm2	0.2546	1.1396e-14																						Tbl1x	0.6742	2.17952e-16														Cdh13	0.9751	0.0118207		Orai1
					Atxn7l1	0.2841	1.70424e-14																						Itpr1	0.5569	2.20369e-16														Rel	1.1103	0.0119842		Gm46224
					Klf4	0.2996	3.23405e-14																						Ankrd13a	0.301	2.56484e-16														Synj1	0.7577	0.0123081		Rpl36
					Zfp326	0.2594	5.82466e-14																						Sumo1	0.3687	3.21738e-16														Imp3	0.3161	0.0123396		Wnk1
					Exoc5	0.2674	6.9186e-14																						Zfand6	0.6325	3.9934e-16														Psmd14	0.6032	0.012714		Ruvbl1
					4932438A13Rik	0.2937	7.362e-14																						Arid2	0.3897	4.09683e-16														Ppp1r13b	0.3822	0.0142481		Taz
					Rnf149	0.2525	7.83955e-14																						Tut4	0.5441	4.12314e-16														Ythdf2	0.5244	0.0145658		Rplp1
					Mpp5	0.2757	1.03739e-13																						Ppp1r12a	0.4623	6.02013e-16														Tanc1	0.3648	0.0148064		Borcs8
					Tra2a	0.3736	1.47352e-13																						Gpat4	0.2528	7.22706e-16														Pdcd4	0.2951	0.0155509		Rps19
					Kif2a	0.2713	1.9442e-13																						Prr14l	0.4019	7.47027e-16														Rasgrp4	0.4768	0.0157232		Cdc37
					Gm20732	0.2644	2.53004e-13																						Tmod3	0.4598	8.26581e-16														Fads1	0.2952	0.0161034		Trabd
					Zfand3	0.2848	3.25459e-13																						Il4ra	0.3209	8.38376e-16														Rpl14	0.6594	0.0161187		Psmb2
					Atg10	0.2643	3.37964e-13																						Casp6	0.2522	8.59246e-16														Cul2	0.4237	0.0163453		1700016P03Rik
					Arl4c	0.293	3.61852e-13																						Ext1	0.8003	9.65126e-16														Hist3h2a	0.6112	0.0164884		Senp7
					Mtmr3	0.2828	3.82e-13																						Rbm3	0.4203	1.34551e-15														Prelid3b	0.2905	0.0175265		Tomm34
					Dot1l	0.2813	4.00857e-13																						Ttc19	0.3558	1.34649e-15														Arl5a	1.0182	0.01764		Fcf1
					Ap3s1	0.2594	4.93248e-13																						Epb41	0.5725	1.48166e-15														Rps8	0.6218	0.0178512		Mbp
					Cbl	0.2902	8.70869e-13																						Rpl29	0.439	1.48494e-15														Ccdc174	0.43	0.0187005		Vrk3
					Arih2	0.2739	1.06769e-12																						Ripk2	0.5332	1.50645e-15														Vim	0.7997	0.019406		Prelid3b
					Lrrfip2	0.2809	1.11109e-12																						Tnrc18	0.6339	1.53158e-15														Lsg1	0.2707	0.0195057		Rpl34
					Uty	0.2787	1.13579e-12																						Dnajb14	0.3852	1.65815e-15														Denr	0.4507	0.0199848		Ndufv1
					Ikzf1	0.3119	1.61304e-12																						Nfkbid	0.4249	1.78161e-15														Tubb4b	0.6752	0.0201471		Hlcs
					Jak1	0.279	2.2298e-12																						Rprd2	0.3018	1.9661e-15														Rabgap1l	0.8769	0.0203122		Ndufb2
					Senp2	0.2505	2.95654e-12																						Tnip1	0.4553	2.07429e-15														Snx20	0.8529	0.0203629		Ikbkb
					Bcas3	0.2949	4.34785e-12																						Zbtb1	0.2569	2.11563e-15														Edil3	0.6625	0.0220835		Immp2l
					Mef2a	0.3465	6.57506e-12																						Paxbp1	0.3869	2.33028e-15														Cyp4f16	0.2884	0.0228416		Tnfaip8
					Nr4a2	0.2748	8.86058e-12																						Kmt2e	0.4385	2.38556e-15														Vgll4	0.8452	0.0231321		Nacc1
					Arih1	0.2755	8.91734e-12																						Olfm1	0.3416	2.81027e-15														Cse1l	0.5805	0.0231621		Rps16
					Larp4b	0.2509	1.39465e-11																						Gdi2	0.5701	2.95765e-15														Mrpl51	0.4093	0.0232217		Atp5c1
					Usp9x	0.2835	1.91663e-11																						Son	0.3818	2.98865e-15														Nedd4l	0.8214	0.0234629		Fau
					Ankrd11	0.2676	2.55291e-11																						Ubxn4	0.475	3.50255e-15														Tpm2	0.4547	0.0235209		Hspa5
					Stam2	0.2711	3.35393e-11																						Mysm1	0.342	3.99963e-15														Ppp1r14c	0.9416	0.023885		Trmt13
					Zswim6	0.3293	3.35865e-11																						Sf3b1	0.3823	4.23962e-15														Hspa5	1.0143	0.0240198		Sirt7
					Fbxl17	0.2627	4.44883e-11																						Rnaset2a	0.3956	4.59004e-15														Zcchc17	0.3286	0.0240423		Rps20
					Acap2	0.2955	1.09235e-10																						Adap1	0.6592	5.56097e-15														Ttc3	0.4236	0.0245028		Def6
					Mat2a	0.2611	1.84995e-10																						Spag9	0.517	5.57914e-15														Spred2	0.67	0.0252642		Eipr1
					Sel1l3	0.3022	5.44012e-10																						Dmtf1	0.2566	5.80905e-15														Npat	0.4336	0.0255748		Rab8a
					St18	0.3973	6.47689e-10																						Rpl22	0.4017	6.27992e-15														Slit3	0.7688	0.02582		Bicra
					Mid1	0.3014	1.4791e-09																						Myl12b	0.4386	6.36315e-15														C2cd5	0.406	0.0263037		Rtl5
					Dusp1	0.3184	1.74472e-09																						Cox17	0.4536	7.20098e-15														Tnfaip2	1.3187	0.0266786		Mfsd14a
					Peli1	0.3515	1.84234e-09																						Ube2j2	0.3919	7.96369e-15														Nudt9	0.5772	0.0274401		Ndufb7
					Ndrg1	0.2861	6.83766e-09																						Tacc1	0.395	8.00174e-15														Sec22a	0.2859	0.0280561		Fbl
					Mmp19	0.6246	1.36249e-08																						Upf2	0.2764	9.69163e-15														Wdr37	0.5259	0.0280646		Itpk1
					St3gal1	0.2638	1.76612e-08																						Pde6d	0.2618	1.09881e-14														Baz1a	0.6727	0.0281773		Rpl26
					Sptlc2	0.3286	3.48677e-08																						Rps12	0.3849	1.10727e-14														Tbce	0.3502	0.0283231		Atp5e
					Isy1	0.2569	4.2884e-08																						Lrch1	0.546	1.2862e-14														Zfp263	0.802	0.0284335		Pdia3
					Ubash3b	0.3413	6.10612e-08																						Gabpb1	0.3914	1.33469e-14														S100a4	1.122	0.0289502		1110059G10Rik
					Dgkh	0.2707	1.07668e-07																						Raet1e	0.3321	1.37155e-14														Sf3b3	0.4223	0.0292337		Ndufab1
					Immp2l	0.3242	1.7308e-07																						Wdr33	0.3688	1.37943e-14														Cmc2	0.3446	0.0319468		Hps5
					Crem	0.2562	2.74791e-07																						Nae1	0.3263	1.53632e-14														Rcl1	0.3069	0.0350349		Erh
					Wac	0.2653	9.4688e-07																						Gtpbp4	0.2908	1.5496e-14														Taf3	0.4753	0.0363048		Synj1
					Eprs	0.3324	4.34364e-05																						Pus10	0.2649	1.55604e-14														Cdv3	0.6908	0.0371472		Nudc
					Rps6ka3	0.2958	0.000139344																						Mau2	0.2964	1.78293e-14														Smg5	0.4543	0.037765		Sh3bgrl3
																													Cnot1	0.3399	1.89416e-14														Arl6ip5	0.6448	0.0383983		Nectin1
																													Limd1	0.3858	2.33695e-14														Ccnd3	0.6245	0.0388777		Sys1
																													Kpna4	0.5619	3.09544e-14														Eif4a3	0.5014	0.0440421		Zfp516
																													Eprs	0.7113	3.10107e-14														Vasp	0.7831	0.0444604		Aim2
																													Rpl6	0.3951	3.41416e-14														Anp32e	0.6865	0.0447801		Trpv2
																													Rps6ka5	0.6658	4.32099e-14														Abca7	0.2593	0.0451855		Ciao2b
																													Mpp7	0.8567	4.35038e-14														Il1rl2	0.8128	0.0452104		Synrg
																													Gpatch2l	0.2803	4.66778e-14														Hdac1	0.5646	0.0452336		Itgb7
																													2007-03-01	0.4688	5.00692e-14														Asap1	0.8432	0.0455724		Aif1
																													Immp2l	0.6737	5.30996e-14														Hdlbp	0.6154	0.045791		Cul2
																													Nup98	0.4821	5.34123e-14														1810037I17Rik	0.7572	0.0481663		Dnajc2
																													Crem	0.5202	5.88822e-14																		Cops3
																													Ubald2	0.4905	6.85471e-14																		Map3k1
																													Tle3	0.42	6.93983e-14																		Ssr2
																													Mink1	0.3068	7.03072e-14																		Supt4a
																													Stxbp3	0.5232	7.28805e-14																		Lmtk2
																													Ahcyl2	0.5414	7.43262e-14																		Tbca
																													Rpl8	0.4244	7.70903e-14																		Klhl5
																													Slc38a1	0.5027	7.85605e-14																		Prkab2
																													Ccdc186	0.264	1.23834e-13																		Suds3
																													Rps2	0.4337	1.28031e-13																		D8Ertd738e
																													Cep350	0.4453	1.49058e-13																		Med20
																													Nap1l1	0.4283	1.51261e-13																		Suclg1
																													Sri	0.4196	1.8685e-13																		R3hdm1
																													Marcks	0.5827	1.91817e-13																		Lclat1
																													Isg15	0.4021	2.23563e-13																		Mlec
																													Irak4	0.3128	2.25675e-13																		Tyk2
																													Crip1	0.9307	2.39496e-13																		Nfatc3
																													Slc9a1	0.414	2.59568e-13																		Trim44
																													Dad1	0.3715	2.90064e-13																		Psma3
																													Tcf20	0.4043	2.98868e-13																		Etv3
																													Hspa5	0.8687	3.12905e-13																		Cux1
																													Ccdc6	0.4212	3.82357e-13																		Cs
																													Ank	0.2884	3.85434e-13																		Rexo1
																													Arfgap3	0.435	4.10058e-13																		Rps21
																													Tnrc6b	0.4773	4.15212e-13																		Ubxn4
																													Golgb1	0.4509	4.53069e-13																		Bccip
																													Adora2a	0.2956	4.9554e-13																		Snrpf
																													Rab11fip1	0.3925	5.10724e-13																		Fam129a
																													Procr	0.8201	5.18332e-13																		Gripap1
																													Zfp451	0.3169	5.63694e-13																		Rps27
																													Tnfsf9	0.427	6.26377e-13																		Sri
																													Sec61g	0.4026	7.11638e-13																		Smim3
																													Ddx5	0.329	8.82137e-13																		Mef2c
																													Tmem258	0.2754	1.03693e-12																		Irf5
																													Fbrsl1	0.2778	1.51039e-12																		Cox7b
																													Ndrg1	0.8023	1.53334e-12																		Gm11361
																													Mbp	0.511	1.62274e-12																		Erp29
																													Stx12	0.394	1.97067e-12																		Cldnd1
																													Ago2	0.4076	2.54181e-12																		Fam168a
																													Ubl5	0.367	2.61472e-12																		Appl1
																													Abhd2	0.2601	3.41185e-12																		Rnh1
																													Rpl13a	0.3412	3.4444e-12																		Rps3a1
																													Dusp5	0.6253	3.58317e-12																		Ssbp2
																													Zfand3	0.4071	4.71204e-12																		Cluap1
																													Arrb2	0.3428	4.71591e-12																		Gm2a
																													Rtf1	0.3059	4.82826e-12																		Laptm4b
																													Setd2	0.4028	5.04869e-12																		Trim12a
																													Dusp16	0.5237	5.95429e-12																		Cd80
																													Gabarapl2	0.2544	6.39472e-12																		Tmem120b
																													Apobec3	0.4245	6.89194e-12																		Ppp4r3b
																													Mta3	0.4058	7.11898e-12																		Dennd4b
																													Trim24	0.3748	7.62116e-12																		Bzw2
																													AU020206	0.3669	7.84252e-12																		Mrpl54
																													Fam107b	0.5931	9.5134e-12																		Gm43661
																													Nt5c2	0.3446	1.0594e-11																		Nme2
																													Nfkb2	0.3736	1.08105e-11																		Ifitm6
																													Gm2a	0.5751	1.10717e-11																		Rps12
																													Tbc1d1	0.4937	1.17021e-11																		Eif3g
																													Rictor	0.3477	1.18581e-11																		Foxn3
																													Sel1l	0.4657	1.23505e-11																		Micos10
																													Rab21	0.4242	1.26569e-11																		Ino80b
																													Rin2	1.0701	1.28233e-11																		Vhl
																													Cdc27	0.2581	1.2869e-11																		Manf
																													Ndufb1-ps	0.3958	1.37499e-11																		Myo9a
																													Zfp62	0.2507	1.39783e-11																		Prkra
																													Ppdpf	0.4076	1.45572e-11																		Wdr1
																													Mthfsl	0.2846	1.56357e-11																		Pfdn6
																													Kmt2a	0.3031	1.62428e-11																		Slc35e1
																													Gm2000	0.2846	1.82003e-11																		Mrpl12
																													Gm48678	0.3039	1.88293e-11																		Rps28
																													Dock5	0.4027	1.93457e-11																		Man2b1
																													Nfkbib	0.31	1.98823e-11																		Trappc4
																													Anxa11	0.581	2.13636e-11																		Bcl7c
																													Zkscan3	0.2741	2.18482e-11																		Emc2
																													Zup1	0.29	2.44584e-11																		Ccdc86
																													Gorasp2	0.2774	2.45165e-11																		Gm15987
																													Abcf1	0.2631	2.74623e-11																		Mea1
																													Alcam	0.7281	2.81743e-11																		Clcn3
																													Serf2	0.3288	2.84395e-11																		Btf3
																													Cop1	0.4282	2.8452e-11																		Slk
																													Ppfibp1	0.304	2.98273e-11																		Abcc4
																													Dnajc10	0.3906	3.19327e-11																		Acss1
																													Cnot6l	0.3122	3.54579e-11																		Ikzf1
																													Prcp	0.382	3.96992e-11																		Rack1
																													Plxnd1	0.3907	4.16456e-11																		Atp5b
																													Zranb1	0.3202	4.26254e-11																		Nemf
																													Wdr37	0.2698	5.14906e-11																		Btbd1
																													Uty	0.5199	5.54323e-11																		Utrn
																													Stk24	0.4684	5.58187e-11																		Lpin1
																													Pfkp	0.4035	6.3447e-11																		Nudt21
																													Stx5a	0.2841	6.50262e-11																		Fuca1
																													Kdm1a	0.2726	6.88389e-11																		Micos13
																													Cnot4	0.3458	7.19096e-11																		Hax1
																													Rpl23a	0.3217	7.61503e-11																		Mplkip
																													Ccnd3	0.2617	7.68219e-11																		Mrpl57
																													Chd7	0.4842	9.20503e-11																		Slc30a7
																													Zfp52	0.3686	1.06474e-10																		Znrd1
																													Gan	0.5396	1.473e-10																		Wrn
																													Cdyl	0.5057	1.831e-10
																													Glipr2	0.4453	2.15079e-10
																													Cnot6	0.2527	2.21034e-10
																													Zfx	0.2878	2.35881e-10
																													St7	0.4277	2.44176e-10
																													Sarnp	0.3189	2.73496e-10
																													Ppib	0.3189	3.27617e-10
																													Ranbp2	0.8568	3.49737e-10
																													Creb1	0.3532	3.57109e-10
																													Actn1	0.952	3.91989e-10
																													Phldb1	0.2715	3.96649e-10
																													Abtb2	0.7121	4.7579e-10
																													Spi1	0.3863	5.02744e-10
																													Psd4	0.2949	6.02017e-10
																													Rnf216	0.3251	6.27908e-10
																													Slc29a3	0.2516	6.43297e-10
																													Maco1	0.312	6.50536e-10
																													Vti1a	0.839	7.51461e-10
																													Dnajc8	0.268	7.57221e-10
																													Gabarapl1	0.4332	8.34694e-10
																													Klhl5	0.2888	8.41438e-10
																													Ankrd44	0.7645	9.77465e-10
																													Pou2f1	0.5055	1.04575e-09
																													Gngt2	0.3914	1.13485e-09
																													Sumo2	0.3402	1.22717e-09
																													Cd47	0.4369	1.25584e-09
																													H13	0.2986	1.3947e-09
																													Atrx	0.4402	1.42842e-09
																													Snap23	0.3439	1.52335e-09
																													Rbm5	0.3081	1.55716e-09
																													Parp4	0.2571	1.63896e-09
																													Zfp263	0.3255	2.19983e-09
																													Mthfs	0.434	2.60716e-09
																													Myh9	0.3907	2.62451e-09
																													Setd7	0.2603	3.05281e-09
																													Pex13	0.27	3.06365e-09
																													Lemd3	0.3917	3.0787e-09
																													Bcl2a1b	0.8098	3.09437e-09
																													Ddit4	0.3379	3.1018e-09
																													Dnaja1	0.3979	3.51855e-09
																													Cdk19	0.3531	4.0284e-09
																													Prnp	0.4322	4.09189e-09
																													Rpl24	0.2879	4.366e-09
																													Fcho2	0.4297	5.92518e-09
																													Tyrobp	0.3789	6.27102e-09
																													Actb	0.5561	6.76606e-09
																													Acin1	0.2836	6.92525e-09
																													Manf	0.4429	8.32538e-09
																													Zmym2	0.2579	9.06687e-09
																													Mir155hg	0.6023	1.05059e-08
																													Csf2ra	0.2598	1.17959e-08
																													2410006H16Rik	0.3067	1.19505e-08
																													Cox5b	0.2903	1.23497e-08
																													Senp6	0.3713	1.26199e-08
																													Tpm4	0.3352	1.26949e-08
																													Naca	0.2935	1.29857e-08
																													Arhgap15	0.6917	1.34169e-08
																													Sbds	0.2722	1.42673e-08
																													Aim2	0.2654	1.45612e-08
																													1810026B05Rik	0.272	1.46142e-08
																													Srp72	0.2621	1.79638e-08
																													Dnajc1	0.9309	1.86595e-08
																													Nfil3	0.3131	1.91324e-08
																													4932438A13Rik	0.425	2.03202e-08
																													Cdk17	0.4151	2.16326e-08
																													Cul1	0.2628	2.16982e-08
																													Rps3a1	0.2883	2.19548e-08
																													Nfkbie	0.3129	2.29634e-08
																													Ash1l	0.316	2.32953e-08
																													Kdm5a	0.3052	2.44876e-08
																													Orai1	0.3438	2.47644e-08
																													Ralgapb	0.2704	2.71582e-08
																													Rpl3	0.348	2.8353e-08
																													Zfp609	0.4249	3.86604e-08
																													Smurf1	0.5147	4.20465e-08
																													Pan3	0.3501	4.2801e-08
																													Myl12a	0.3321	4.40792e-08
																													Rp9	0.2594	5.11536e-08
																													Mtmr6	0.2669	5.39507e-08
																													N4bp2l1	0.2988	5.6782e-08
																													Adipor2	0.4013	6.53956e-08
																													Slc38a2	0.4355	7.1551e-08
																													Atxn7	0.3443	8.20049e-08
																													Yme1l1	0.2667	8.28739e-08
																													Coro2a	0.2777	8.37917e-08
																													Arid4b	0.3295	8.81452e-08
																													Smc1a	0.2628	9.80243e-08
																													Tor1aip2	0.2757	1.17812e-07
																													Phactr2	0.4332	1.2834e-07
																													Rbm27	0.265	1.34046e-07
																													Top1	0.3184	1.41481e-07
																													Wrn	0.2539	1.4155e-07
																													Plekha2	0.3072	1.48752e-07
																													Atp5e	0.3084	1.72479e-07
																													Heatr5a	0.3429	1.93159e-07
																													Lrch3	0.3605	2.20002e-07
																													Abhd17b	0.4576	2.40584e-07
																													Zfr	0.3507	2.47886e-07
																													Rai1	0.2581	2.66241e-07
																													Tnfaip8	0.5433	3.02598e-07
																													Ythdc1	0.3185	3.57965e-07
																													Tax1bp1	0.2921	4.448e-07
																													Rpl36al	0.337	4.46171e-07
																													Abi3	0.2788	4.67426e-07
																													Relch	0.273	5.29933e-07
																													Ralgapa1	0.3006	5.48051e-07
																													Epb41l2	0.3527	6.53855e-07
																													Rps8	0.2781	9.00159e-07
																													Ebi3	0.363	9.31172e-07
																													Zfp638	0.2816	9.39595e-07
																													Nedd4l	0.4315	1.22877e-06
																													Lmo4	0.322	1.24854e-06
																													Lats2	0.263	1.45948e-06
																													Bin1	0.3169	1.53852e-06
																													Alpk1	0.3012	1.73046e-06
																													Ccr5	0.7394	1.80754e-06
																													Dapk1	0.5897	2.02643e-06
																													Tnfrsf11a	0.5856	2.17619e-06
																													Nsd3	0.3815	2.362e-06
																													Ahr	0.5069	2.52706e-06
																													Gm15726	0.5428	2.67376e-06
																													Gatad2b	0.3135	2.96321e-06
																													Ldlrad4	0.4919	2.97169e-06
																													Hsp90ab1	0.281	3.10775e-06
																													Dhx40	0.7026	3.18482e-06
																													B3gnt5	0.3061	3.18758e-06
																													Mbnl2	0.4426	4.45788e-06
																													Ncor1	0.3037	4.86834e-06
																													Smdt1	0.2988	5.22961e-06
																													Ero1lb	0.3143	5.34887e-06
																													Ptges3	0.2533	5.53799e-06
																													Tnks	0.3674	5.89209e-06
																													Trerf1	0.5462	5.97144e-06
																													Nlk	0.3149	6.26013e-06
																													Rpl7a	0.2716	7.10722e-06
																													Cers6	0.7836	7.72075e-06
																													Atxn7l1	0.4717	8.08662e-06
																													Resf1	0.284	8.84163e-06
																													Kdm6a	0.275	1.04271e-05
																													Eml4	0.2847	1.16906e-05
																													Hspe1	0.273	1.18065e-05
																													Nme2	0.316	1.2843e-05
																													Sertad2	0.3387	1.328e-05
																													Rab10	0.4176	1.7347e-05
																													Zc3h7a	0.3506	1.75463e-05
																													Nfatc1	0.2742	1.75776e-05
																													Gmeb2	0.3007	1.79581e-05
																													Stard7	0.3527	1.83606e-05
																													Gm46224	0.2988	2.29896e-05
																													Lyn	0.5102	2.4615e-05
																													Sik2	0.3825	2.90881e-05
																													Crebbp	0.2843	3.21054e-05
																													Uqcrh	0.2611	3.60896e-05
																													Bmt2	0.3382	3.87299e-05
																													Crlf3	0.3217	4.08564e-05
																													Prex1	0.3912	4.24133e-05
																													Birc3	0.3718	4.76532e-05
																													Cnbp	0.2781	5.73821e-05
																													Gpd2	0.3696	5.87202e-05
																													Ambra1	0.2839	6.51852e-05
																													Rbm25	0.2832	6.7738e-05
																													Ctsh	0.2578	6.84524e-05
																													Pnpla8	0.2707	6.91528e-05
																													Rpl36a	0.272	7.45581e-05
																													Tmsb10	0.3324	7.77975e-05
																													Usp9x	0.2567	8.13178e-05
																													Ptma	0.2829	8.20496e-05
																													Pcyt1a	0.8643	8.71501e-05
																													Sbno2	0.3407	0.000102249
																													Cnnm2	0.4242	0.000134999
																													Rapgef2	0.4889	0.000138519
																													Sgk3	0.3012	0.00013919
																													Rps28	0.2733	0.00015298
																													Rps27l	0.6861	0.000156926
																													Tspo	0.3368	0.000161699
																													Nlrc5	0.3385	0.000162077
																													Fam114a1	0.2997	0.000209873
																													Got1	0.3835	0.000216475
																													Slc8a1	0.4158	0.000222152
																													Arhgef10l	0.2769	0.000233596
																													Arid1b	0.3431	0.000237582
																													Rdx	0.2687	0.000257201
																													Rpl31	0.3178	0.000269645
																													Tob2	0.2562	0.00027042
																													Fam193a	0.257	0.000292723
																													Arfgef1	0.4013	0.000303395
																													Gadd45b	0.4212	0.000365991
																													Mlxip	0.2718	0.000404909
																													Mllt10	0.3487	0.000522198
																													Slc39a14	0.4398	0.000636144
																													Nr4a2	0.4859	0.000681384
																													Far1	0.2696	0.000877816
																													Trappc9	0.269	0.000933422
																													Smc6	0.7945	0.000937306
																													Tbc1d15	0.2517	0.000972381
																													Tet2	0.2602	0.00107094
																													Rab8b	0.3087	0.00153638
																													Macrod2	0.4078	0.00239132
																													Ubb	0.2581	0.00295331
																													Sos1	0.2865	0.00307081
																													Olr1	0.329	0.0040742
																													Cyfip1	0.2525	0.00430353
																													Rhoq	0.5317	0.00445451
																													Ppp2r5a	0.266	0.00456817
																													Ifnar1	0.2761	0.00475822
																													Traf3	0.6547	0.00484681
																													Fxyd5	0.4519	0.00499883
																													Foxn2	0.2796	0.00531514
																													Piezo1	0.3392	0.00540137
																													Ogfrl1	0.4192	0.00557846
																													Nsf	0.4085	0.0056529
																													Cdk13	0.2648	0.00669987
																													Ywhah	0.2739	0.00691396
																													Fosl2	0.2656	0.0115339
																													Ncf1	0.5118	0.0126643
																													Neurl3	0.2748	0.012724
																													Micu1	0.56	0.0128149
																													Clcn5	0.4427	0.0137673
																													Arl5b	0.267	0.0138372
																													Itprid2	0.2812	0.0172775
																													Hacd2	0.2657	0.0175089
																													Chd4	0.2678	0.022161
																													Fam49b	0.3326	0.0250879
																													Castor2	0.346	0.0336702
																													Cask	0.4333	0.0354376
																													Ifitm3	0.5403	0.0377927
																													Glis3	0.8976	0.041991
																													Vcp	0.2588	0.0444047
[truncated: 2 more columns]
